# Supplementary material for: Transcriptome Profiling of a Salt Excluder Hybrid Grapevine Rootstock ‘Ruggeri’ throughout Salinity
Source: Plants (Basel). 2024 Mar 14;13(6):837. doi: 10.3390/plants13060837 (PMC10974295; doi:10.3390/plants13060837)
Supplement: Supplementary file 1 [file plants-13-00837-s001.zip]

Archive with 7 entries (7 files):
- Supplementary Figures.pdf
- Tabel S1.xlsx
- Tabel S2.xlsx
- Tabel S3.xlsx
- Tabel S4.xlsx
- Tabel S5.xlsx
- Tabel S6.xlsx
