# Supplementary material for: Transcriptome Profiling of a Salt Excluder Hybrid Grapevine Rootstock ‘Ruggeri’ throughout Salinity
Source: Plants (Basel). 2024 Mar 14;13(6):837. doi: 10.3390/plants13060837 (PMC10974295; doi:10.3390/plants13060837)
Supplement: Supplementary file 1 [file plants-13-00837-s001.zip › Tabel S1.xlsx]

## Sheet: Read mapping rate
Table S1: Summary of read mapping rate of RNA-Seq library of Ruggeri leaves at different time points of salt stress or recovery experiment.
Sample ID	Input Read Pairs	Both Surviving reads	Both Surviving reads (%)	STAR Alignment		Salmon after STAR
				Uniquely mapped reads number	Uniquely mapped reads %	Total mapped reads	Uniquely mapped reads	ambiguously mapped reads
1R_control_R1	28509798	28132723	0.9868	25427208	0.9038	13929231	7759059	6170172
1R_control_R2	30393211	29897469	0.9837	27060391	0.9051	15317418	8629624	6687794
1R_control_R3	35884978	35440319	0.9876	31995215	0.9028	16552754	9400139	7152615
2R_S0_R1	26267747	25866245	0.9847	22847937	0.8833	11697112	6266189	5430923
2R_S0_R2	30491856	30016183	0.9844	26995564	0.8994	14762735	7817841	6944894
2R_S0_R3	24126562	23645342	0.9801	21301899	0.9009	11909604	6399960	5509644
3R_S05_R1	28279547	27810874	0.9834	24835882	0.893	12748558	6612715	6135843
3R_S05_R2	28420846	27879028	0.9809	24568106	0.8812	11309548	5901562	5407986
3R_S05_R3	25566200	25127601	0.9828	22373203	0.8904	11384519	5909638	5474881
4R_S2h_R1	23891723	23535598	0.9851	19830271	0.8426	6983591	3603678	3379913
4R_S2h_R2	26076146	25675138	0.9846	22334483	0.8699	9712040	5002882	4709158
4R_S2h_R3	24409732	24060031	0.9857	21419622	0.8903	10502707	5435574	5067133
5R_S24h_R1	25416837	25004706	0.9838	22487626	0.8993	12661357	7534456	5126901
5R_S24h_R2	24296038	23904231	0.9839	21205942	0.8871	11010818	6544818	4466000
5R_S24h_R3	23133558	22701837	0.9813	19729254	0.8691	9337807	5661254	3676553
6R_S48h_R1	24761698	24375596	0.9844	21978264	0.9017	12343271	6746456	5596815
6R_S48h_R2	23550933	23109152	0.9812	20833054	0.9015	11720405	6466181	5254224
6R_S48h_R3	27028996	26620072	0.9849	24181641	0.9084	13074439	7409685	5664754
7R_S4d_R1	26042580	25840454	0.9922	23252436	0.8998	12291529	6623752	5667777
7R_S4d_R2	21407962	21150457	0.988	18830286	0.8903	9568513	5245045	4323468
7R_S4d_R3	24124165	23738448	0.984	21406179	0.9018	12273613	6725907	5547706
8R_S12d_R1	27226837	26536967	0.9747	23766626	0.8956	13099515	7199622	5899893
8R_S12d_R2	22774887	22245465	0.9768	19867990	0.8931	11227434	6247313	4980121
8R_S12d_R3	28253632	27811430	0.9843	25209523	0.9064	14552192	8243428	6308764
