# Supplementary material for: Transcriptome Profiling of a Salt Excluder Hybrid Grapevine Rootstock ‘Ruggeri’ throughout Salinity
Source: Plants (Basel). 2024 Mar 14;13(6):837. doi: 10.3390/plants13060837 (PMC10974295; doi:10.3390/plants13060837)
Supplement: Supplementary file 1 [file plants-13-00837-s001.zip › Tabel S2.xlsx]

## Sheet: DE_Genes
Table S2.1: Significantly expressed genes over the time course of salt stress and recovery in Ruggeri rootstock. By using DESeq2, each time point was compared to each consecutive one, resulting in 12760 unique significantly expressed genes with FDR < 0.05.
Condition	Sig. Genes	Up-regulated Genes	Down-regulated Genes
R2-R1	6654	3269	3385
R3-R2	2528	876	1652
R4-R3	1662	764	898
R5-R4	9138	4907	4231
R6-R5	6997	3375	3622
R7-R6	1361	637	724
R8-R7	5058	2764	2294
Total number of genes	33398	16592	16806
Unique genes	12760	10532	10888
Table S2.2: Commonly differentially expressed genes (DEGs) during salt stress and recovery procedure in Ruggeri rootstock (cut-off threshold, log2(FC) ≥ ±1.5; FDR < 0.05).
Condition	Total number of DEGs	Up-regulated Genes	Down-regulated Genes
R2-R1	2475	1058	1417
R3-R2	1031	201	830
R4-R3	390	161	229
R5-R4	4646	2627	2019
R6-R5	2539	1180	1359
R7-R6	353	61	292
R8-R7	1780	1217	563
Total number of genes	13214	6505	6709
Unique genes	6736	4950	5278

## Sheet: R2-R1
	GENE ID	base Mean	log2FoldChange	lfcSE	Stat	P value	P adj
1	VIT_219s0140g00230	13.495	9.09338	1.35331	6.71936	1.83e-11	3.41e-10
2	VIT_210s0003g03990	19.4171	8.99753	1.45578	6.18054	6.39e-10	9.66e-09
3	VIT_207s0005g03220	22.1086	8.95762	1.38011	6.49051	8.55e-11	1.45e-09
4	VIT_213s0019g04160	7.30821	8.5491	3.48339	2.45425	0.014118	0.0418799
5	VIT_210s0116g01316	6.67938	8.05581	3.2498	2.47886	0.0131802	0.0396092
6	VIT_204s0044g00840	7.13097	7.79392	1.85574	4.19991	2.67e-05	0.000176351
7	VIT_204s0023g00430	7.2869	7.71526	1.8636	4.13998	3.47e-05	0.000223814
8	VIT_208s0007g05840	8.38162	7.6885	1.51137	5.08712	3.64e-07	3.52e-06
9	VIT_218s0041g01773	5.38748	7.65674	1.9102	4.00834	6.11e-05	0.000369906
10	VIT_218s0041g02070	17.5746	7.50521	1.44163	5.20607	1.93e-07	1.96e-06
11	VIT_207s0005g03200	11.4226	7.48264	1.46134	5.12039	3.05e-07	3e-06
12	VIT_210s0116g01330	4.95969	7.41771	2.47341	2.99897	0.0027089	0.0104247
13	VIT_204s0008g03500	6.37845	7.3751	3.08626	2.38966	0.0168642	0.0486256
14	VIT_219s0027g00880	4.86882	7.29467	1.6994	4.2925	1.77e-05	0.00012056
15	VIT_210s0116g01360	3.10745	7.27886	2.4162	3.01252	0.00259086	0.0100414
16	VIT_216s0100g01000	24.3809	7.09826	1.29898	5.46448	4.64e-08	5.23e-07
17	VIT_216s0100g00840	40.354	6.83789	1.49582	4.57132	4.85e-06	3.75e-05
18	VIT_200s0258g00135	4.8911	6.79291	2.38745	2.84526	0.00443747	0.0158574
19	VIT_202s0025g03740	3.96363	6.78665	1.80144	3.76734	0.000164998	0.000895128
20	VIT_215s0045g00530	4.99418	6.70267	1.5506	4.32262	1.54e-05	0.000106938
21	VIT_216s0050g02600	2.96325	6.70148	2.04001	3.28502	0.00101974	0.00448309
22	VIT_217s0000g00931	3.53078	6.64254	2.27593	2.91861	0.00351599	0.0130655
23	VIT_212s0134g00590	4.61295	6.6105	1.8127	3.64677	0.000265554	0.00135984
24	VIT_210s0116g01375	2.56357	6.41102	2.25468	2.84343	0.00446305	0.0159317
25	VIT_216s0100g00920	14.6893	6.40332	1.98046	3.23325	0.00122391	0.00524531
26	VIT_218s0001g08820	12.7188	6.34454	1.43808	4.41181	1.03e-05	7.41e-05
27	VIT_205s0020g02730	3.95259	6.24472	2.21291	2.82195	0.00477321	0.0168685
28	VIT_215s0046g03332	7.42873	6.18504	1.96924	3.14083	0.00168469	0.00694102
29	VIT_216s0100g00800	45.3819	6.13829	2.02087	3.03745	0.00238589	0.00935335
30	VIT_206s0009g03013	15.15	6.13113	1.50941	4.06194	4.87e-05	0.000303058
31	VIT_214s0006g01670	2.77456	6.11753	2.51207	2.43526	0.0148812	0.0437764
32	VIT_209s0002g00540	2.73304	6.1172	2.01358	3.03796	0.00238182	0.00933933
33	VIT_216s0013g00280	3.25928	6.0967	2.00858	3.03533	0.00240274	0.00941554
34	VIT_201s0150g00300	3.44186	6.07607	1.99359	3.0478	0.00230523	0.00907055
35	VIT_219s0014g03950	4.10711	6.06804	1.8674	3.24946	0.00115625	0.00499688
36	VIT_218s0072g01090	3.63116	6.02307	1.88323	3.19826	0.00138257	0.00582677
37	VIT_215s0046g03420	5.12183	6.01209	1.62332	3.70357	0.000212584	0.00111431
38	VIT_211s0016g02070	395.751	5.93982	0.521622	11.3872	4.84e-30	4.55e-28
39	VIT_219s0090g01040	5.27026	5.93848	1.72081	3.45098	0.000558556	0.00263402
40	VIT_214s0036g01400	2.33264	5.93386	2.2598	2.62584	0.00864358	0.027811
41	VIT_211s0037g00470	14.1893	5.91967	1.35172	4.37936	1.19e-05	8.47e-05
42	VIT_210s0042g00840	50.5898	5.91905	0.796884	7.42775	1.1e-13	2.81e-12
43	VIT_211s0118g00580	10.7726	5.7494	1.25341	4.587	4.5e-06	3.5e-05
44	VIT_216s0022g02430	3.03242	5.74614	2.19888	2.61321	0.00896972	0.0287103
45	VIT_202s0012g03140	5.43677	5.73446	1.99674	2.87191	0.00408004	0.0148309
46	VIT_204s0069g00300	7.63292	5.67292	1.80943	3.1352	0.00171739	0.00704381
47	VIT_200s0424g00020	5.31898	5.65945	1.91865	2.94971	0.00318076	0.0119773
48	VIT_218s0001g11950	426.799	5.64977	0.361436	15.6314	4.45e-55	1.84e-52
49	VIT_208s0007g07390	6.94604	5.64643	1.30864	4.31472	1.6e-05	0.000110234
50	VIT_217s0053g00390	2.41831	5.63141	2.05861	2.73553	0.00622794	0.0211177
51	VIT_209s0002g06400	3.85374	5.59638	2.24052	2.4978	0.0124965	0.0379068
52	VIT_201s0010g01970	68.1313	5.58123	1.44884	3.8522	0.00011706	0.000658463
53	VIT_216s0100g00940	320.536	5.52341	1.26036	4.38241	1.17e-05	8.37e-05
54	VIT_203s0088g01090	3.05659	5.48582	2.04903	2.67728	0.00742234	0.0244549
55	VIT_216s0050g01920	6.16862	5.46655	1.56811	3.48608	0.000490156	0.00234332
56	VIT_200s0288g00020	4.81483	5.41602	1.91346	2.83049	0.00464769	0.0165105
57	VIT_207s0031g00705	71.5771	5.34392	1.81977	2.93659	0.00331839	0.0124366
58	VIT_213s0019g00300	6.85604	5.33367	1.37147	3.88902	0.000100651	0.000576383
59	VIT_208s0056g00630	4.45095	5.32131	1.99318	2.66976	0.00759048	0.0249185
60	VIT_204s0069g00880	7.66056	5.31076	1.36208	3.899	9.66e-05	0.000555783
61	VIT_201s0011g06565	9.51429	5.30686	1.35023	3.93035	8.48e-05	0.000495085
62	VIT_210s0042g00610	6.76448	5.30534	1.3804	3.84333	0.000121376	0.000680935
63	VIT_208s0058g00104	7.05331	5.29012	1.57878	3.35076	0.000805887	0.00363592
64	VIT_207s0005g06210	3.18174	5.26514	1.73867	3.02826	0.00245964	0.00960499
65	VIT_209s0002g07690	3.71177	5.23293	1.87539	2.79032	0.0052656	0.0183469
66	VIT_200s0187g00030	3.01546	5.1899	2.17859	2.38223	0.0172082	0.0494329
67	VIT_206s0080g00790	74.4193	5.15719	0.675936	7.6297	2.35e-14	6.34e-13
68	VIT_216s0100g00810	376.832	5.14579	0.746589	6.8924	5.49e-12	1.11e-10
69	VIT_217s0000g02150	4.44016	5.12291	2.08062	2.46221	0.0138084	0.0411664
70	VIT_216s0050g02060	14.3664	5.08555	1.26167	4.03082	5.56e-05	0.000340896
71	VIT_200s0772g00020	3.05627	5.05409	2.03085	2.48866	0.0128226	0.0386928
72	VIT_216s0100g00860	618.374	5.04633	0.707601	7.1316	9.92e-13	2.22e-11
73	VIT_218s0001g03410	11.11	4.95848	1.05273	4.71013	2.48e-06	2.02e-05
74	VIT_202s0012g00170	2456.75	4.94416	0.235055	21.034	3.2e-98	1.22e-94
75	VIT_212s0035g00200	2.57857	4.90848	1.93221	2.54034	0.0110744	0.0342963
76	VIT_200s0207g00180	24.878	4.89668	0.848579	5.77045	7.91e-09	1e-07
77	VIT_218s0001g03260	6.54687	4.84593	1.4235	3.40424	0.000663473	0.00306218
78	VIT_203s0091g01060	12.375	4.79327	1.45124	3.30288	0.000956984	0.00422864
79	VIT_209s0054g00199	10.628	4.79058	1.09193	4.38725	1.15e-05	8.19e-05
80	VIT_212s0057g00220	19.1015	4.76952	0.932571	5.11437	3.15e-07	3.09e-06
81	VIT_200s2659g00010	18.7194	4.76229	1.04793	4.54447	5.51e-06	4.2e-05
82	VIT_218s0089g00630	5.22329	4.72941	1.6552	2.8573	0.00427255	0.0154015
83	VIT_204s0069g00163	4.12373	4.72604	1.8643	2.53502	0.0112441	0.034726
84	VIT_210s0042g00920	152.573	4.70394	1.0821	4.34705	1.38e-05	9.67e-05
85	VIT_211s0016g02980	12.5232	4.69058	1.11629	4.20193	2.65e-05	0.000174968
86	VIT_216s0100g00930	371.92	4.68799	0.698435	6.71214	1.92e-11	3.58e-10
87	VIT_207s0005g02250	4.52402	4.65709	1.73089	2.69057	0.00713305	0.0236487
88	VIT_215s0048g00190	7.83019	4.56413	1.25931	3.62431	0.000289736	0.00146519
89	VIT_200s0271g00110	10.666	4.56199	1.67454	2.72433	0.00644326	0.0217051
90	VIT_206s0080g00970	3.88909	4.55553	1.86868	2.43784	0.0147755	0.0435258
91	VIT_204s0079g00810	15.9064	4.52069	0.90322	5.00508	5.58e-07	5.2e-06
92	VIT_209s0070g00650	13.5153	4.50521	1.64022	2.74671	0.00601971	0.020537
93	VIT_202s0087g00710	574.727	4.50093	0.510935	8.80921	1.26e-18	5.3e-17
94	VIT_211s0037g00670	40.6989	4.49674	0.722398	6.22475	4.82e-10	7.4e-09
95	VIT_216s0098g01380	5.71672	4.49368	1.44221	3.11584	0.00183421	0.00746836
96	VIT_209s0002g02760	181.585	4.49363	0.430893	10.4286	1.83e-25	1.33e-23
97	VIT_211s0016g05550	79.5446	4.47258	0.527107	8.48514	2.15e-17	8.21e-16
98	VIT_206s0004g01670	74.6006	4.46456	0.505024	8.84029	9.55e-19	4.04e-17
99	VIT_210s0003g00800	7.89963	4.45664	1.19993	3.7141	0.000203927	0.00107573
100	VIT_218s0122g00820	8.40053	4.44295	1.08549	4.09304	4.26e-05	0.000268803
101	VIT_218s0001g00400	20.0023	4.43065	1.19501	3.70764	0.000209202	0.00109961
102	VIT_201s0026g02365	25.4525	4.42251	0.782108	5.6546	1.56e-08	1.9e-07
103	VIT_214s0068g00291	14.8281	4.40886	0.989039	4.45772	8.28e-06	6.11e-05
104	VIT_218s0041g02010	30.1421	4.39554	0.877556	5.00884	5.48e-07	5.12e-06
105	VIT_211s0118g00050	6.79251	4.36696	1.64001	2.66276	0.00775038	0.0253779
106	VIT_219s0014g02520	10.976	4.28711	1.46792	2.92053	0.00349432	0.0130001
107	VIT_217s0000g03370	637.918	4.27751	0.430544	9.93512	2.93e-23	1.83e-21
108	VIT_210s0042g00910	7.46051	4.25488	1.45236	2.92964	0.00339352	0.0126808
109	VIT_203s0110g00170	26.8635	4.22198	0.851993	4.95541	7.22e-07	6.58e-06
110	VIT_217s0053g00506	36.0526	4.22123	0.636012	6.63702	3.2e-11	5.77e-10
111	VIT_210s0042g00930	138.031	4.19693	1.04584	4.01299	6e-05	0.000364187
112	VIT_209s0002g04560	334.512	4.19092	0.328831	12.7449	3.33e-37	4.88e-35
113	VIT_216s0148g00210	315.451	4.15215	0.270241	15.3646	2.83e-53	1.06e-50
114	VIT_210s0003g00770	24.2116	4.13297	0.603256	6.85111	7.33e-12	1.44e-10
115	VIT_218s0001g07380	121.429	4.1329	0.52926	7.80884	5.77e-15	1.67e-13
116	VIT_218s0166g00090	17.4689	4.13078	0.989098	4.17631	2.96e-05	0.000193526
117	VIT_201s0011g03800	7.19425	4.1252	1.56728	2.63207	0.00848654	0.0273889
118	VIT_204s0008g04820	13.0377	4.12149	1.22021	3.37769	0.000730975	0.00333262
119	VIT_214s0030g01410	6.30847	4.11833	1.60239	2.57013	0.0101662	0.03192
120	VIT_214s0081g00340	4.28086	4.11235	1.52565	2.69547	0.0070289	0.0233684
121	VIT_205s0020g03910	65.6806	4.1039	0.482439	8.50656	1.79e-17	6.88e-16
122	VIT_218s0041g00020	95.296	4.09304	0.552816	7.40399	1.32e-13	3.32e-12
123	VIT_205s0049g01020	321.731	4.03882	0.512896	7.87455	3.42e-15	1.01e-13
124	VIT_200s0409g00050	9.74019	4.00529	1.10932	3.61057	0.000305522	0.00153364
125	VIT_218s0041g01010	8.09989	3.96313	1.509	2.62633	0.00863099	0.0277752
126	VIT_205s0020g02920	62.0829	3.94714	0.667853	5.91019	3.42e-09	4.59e-08
127	VIT_210s0003g05230	4.45893	3.91924	1.52589	2.5685	0.010214	0.0320373
128	VIT_209s0018g00655	139.723	3.9145	0.673666	5.81075	6.22e-09	8.05e-08
129	VIT_210s0003g00380	29.4631	3.90936	0.887274	4.40604	1.05e-05	7.59e-05
130	VIT_205s0020g03680	7.3659	3.89159	1.47387	2.64039	0.00828105	0.0268346
131	VIT_204s0008g04940	20.1538	3.86764	1.02535	3.77201	0.000161935	0.000880261
132	VIT_209s0018g00735	257.399	3.85696	0.404462	9.53602	1.48e-21	8.09e-20
133	VIT_208s0007g07190	200.168	3.83165	0.410755	9.32832	1.08e-20	5.5e-19
134	VIT_208s0007g02510	91.7614	3.82899	0.454062	8.43275	3.38e-17	1.25e-15
135	VIT_200s0144g00220	324.788	3.8277	0.333162	11.489	1.5e-30	1.49e-28
136	VIT_216s0100g00850	195.016	3.79932	1.13215	3.35584	0.000791229	0.00357741
137	VIT_216s0100g01010	183.951	3.79864	0.79422	4.78285	1.73e-06	1.46e-05
138	VIT_203s0167g00220	5.63751	3.79752	1.48401	2.55897	0.0104984	0.0328268
139	VIT_205s0020g04670	110.756	3.79591	0.543965	6.97823	2.99e-12	6.26e-11
140	VIT_214s0108g01350	578.743	3.78693	0.285749	13.2527	4.35e-40	7.48e-38
141	VIT_200s0258g00140	124.036	3.77816	0.460225	8.20937	2.22e-16	7.58e-15
142	VIT_200s0275g00030	23.447	3.77516	1.03089	3.66203	0.000250223	0.00129116
143	VIT_218s0001g03400	26.0828	3.77488	1.05491	3.57839	0.000345716	0.00171376
144	VIT_215s0048g01080	42.71	3.76387	0.702681	5.35644	8.49e-08	9.15e-07
145	VIT_216s0098g00190	346.331	3.7615	0.286773	13.1166	2.64e-39	4.35e-37
146	VIT_201s0011g00120	13.9846	3.75864	1.17128	3.20901	0.00133192	0.00564234
147	VIT_219s0027g00230	14.2561	3.75425	1.03322	3.63355	0.000279544	0.00142005
148	VIT_209s0018g00670	224.721	3.73876	0.364909	10.2457	1.24e-24	8.61e-23
149	VIT_217s0000g08460	9.46683	3.71725	0.988181	3.76171	0.000168754	0.000913425
150	VIT_200s0411g00010	7.71201	3.7044	1.11641	3.31813	0.000906225	0.0040333
151	VIT_207s0104g01774	493.264	3.69354	0.282787	13.0612	5.48e-39	8.94e-37
152	VIT_219s0027g00870	11.2521	3.68586	1.00998	3.64944	0.000262813	0.00134834
153	VIT_216s0100g01040	66.4754	3.66281	0.717841	5.10254	3.35e-07	3.27e-06
154	VIT_206s0004g05650	84.108	3.66151	0.51098	7.16567	7.74e-13	1.76e-11
155	VIT_217s0000g02100	7.31193	3.6611	1.37794	2.65694	0.00788528	0.0257446
156	VIT_210s0042g00890	49.4223	3.6607	0.574793	6.36873	1.91e-10	3.08e-09
157	VIT_216s0148g00370	36.0742	3.64766	0.600459	6.07479	1.24e-09	1.79e-08
158	VIT_218s0089g00650	20.2146	3.64539	1.00747	3.61838	0.000296457	0.00149403
159	VIT_209s0002g03640	4769.21	3.62419	0.217998	16.6249	4.6e-62	2.37e-59
160	VIT_218s0122g00520	14.0258	3.62191	1.16381	3.1121	0.00185759	0.00754411
161	VIT_209s0002g01680	65.5347	3.62081	0.536975	6.74299	1.55e-11	2.94e-10
162	VIT_200s0174g00070	148.947	3.62048	0.455508	7.94821	1.89e-15	5.73e-14
163	VIT_216s0013g00495	8.49469	3.61474	1.29544	2.79035	0.00526506	0.0183469
164	VIT_218s0041g01770	16.4798	3.6145	0.771282	4.68635	2.78e-06	2.24e-05
165	VIT_205s0020g04990	8.92077	3.61024	1.28394	2.81185	0.00492569	0.0173111
166	VIT_218s0089g00660	109.809	3.60667	0.54056	6.67209	2.52e-11	4.63e-10
167	VIT_200s0144g00270	230.49	3.60474	0.400882	8.99203	2.43e-19	1.09e-17
168	VIT_209s0002g03570	517.285	3.60332	0.285519	12.6202	1.63e-36	2.29e-34
169	VIT_213s0106g00145	7.34764	3.60058	1.31653	2.7349	0.00623988	0.0211506
170	VIT_209s0002g03560	988.317	3.58558	0.255309	14.0441	8.37e-45	1.78e-42
171	VIT_219s0014g03070	5.74118	3.58267	1.33521	2.68323	0.00729144	0.0241092
172	VIT_218s0041g00030	170.043	3.57816	0.297284	12.0362	2.29e-33	2.68e-31
173	VIT_213s0067g00890	6.06763	3.57731	1.20387	2.97151	0.00296336	0.0112609
174	VIT_209s0018g00710	106.34	3.56089	0.435429	8.1779	2.89e-16	9.58e-15
175	VIT_219s0014g05150	128.697	3.55284	0.39412	9.01462	1.98e-19	8.95e-18
176	VIT_219s0014g02450	47.6123	3.53538	0.51723	6.83522	8.19e-12	1.61e-10
177	VIT_212s0059g02630	397.73	3.53019	0.271429	13.0059	1.13e-38	1.82e-36
178	VIT_200s0258g00010	197.163	3.52762	0.688552	5.12325	3e-07	2.96e-06
179	VIT_216s0050g01550	96.9413	3.52762	0.430273	8.19857	2.43e-16	8.2e-15
180	VIT_216s0098g00220	404.45	3.52708	0.283153	12.4565	1.29e-35	1.72e-33
181	VIT_212s0028g01290	18.5459	3.52349	0.931699	3.78179	0.000155707	0.000849795
182	VIT_200s0480g00020	7.26531	3.51665	1.40731	2.49885	0.0124596	0.037819
183	VIT_211s0016g04065	8.48431	3.50909	1.36409	2.57248	0.0100974	0.0317311
184	VIT_206s0004g01580	71.1598	3.49549	0.470039	7.43659	1.03e-13	2.64e-12
185	VIT_201s0010g03084	18.8965	3.48257	0.683547	5.09485	3.49e-07	3.39e-06
186	VIT_200s0144g00040	13.5122	3.47896	0.80115	4.34246	1.41e-05	9.86e-05
187	VIT_216s0050g02510	788.618	3.47171	0.300605	11.5491	7.46e-31	7.57e-29
188	VIT_203s0017g01420	17.4461	3.4627	0.744092	4.65359	3.26e-06	2.6e-05
189	VIT_207s0031g01130	897.493	3.45347	0.308208	11.205	3.85e-29	3.44e-27
190	VIT_209s0002g03550	1220.36	3.44238	0.318865	10.7957	3.61e-27	2.87e-25
191	VIT_211s0052g00230	165.89	3.44029	0.341512	10.0737	7.22e-24	4.7e-22
192	VIT_208s0007g02940	61.3474	3.4247	0.582618	5.87811	4.15e-09	5.49e-08
193	VIT_205s0124g00300	7.58572	3.42083	1.3796	2.47959	0.0131534	0.0395471
194	VIT_205s0020g03690	1468.73	3.42018	0.295428	11.577	5.39e-31	5.62e-29
195	VIT_205s0102g01066	9.1118	3.41971	1.36629	2.50291	0.0123178	0.0374719
196	VIT_213s0074g00540	9.1108	3.4111	0.900294	3.78887	0.000151335	0.000829498
197	VIT_208s0007g08230	300.098	3.40559	0.371452	9.16832	4.8e-20	2.3e-18
198	VIT_208s0007g06560	319.038	3.38667	0.310859	10.8945	1.22e-27	1.01e-25
199	VIT_207s0141g00840	12.2466	3.38047	1.34067	2.52147	0.0116867	0.0358896
200	VIT_219s0014g01830	157.827	3.37979	0.345467	9.78325	1.33e-22	7.83e-21
201	VIT_210s0003g00050	41.6175	3.37767	0.548292	6.16034	7.26e-10	1.09e-08
202	VIT_214s0081g00190	31.7325	3.37416	0.708524	4.76224	1.91e-06	1.61e-05
203	VIT_209s0002g08840	36.5964	3.37319	0.58569	5.75934	8.44e-09	1.06e-07
204	VIT_217s0000g01915	59.5494	3.36468	0.772849	4.3536	1.34e-05	9.42e-05
205	VIT_200s0409g00060	36.6346	3.35981	0.706196	4.75762	1.96e-06	1.64e-05
206	VIT_215s0048g00980	3.8844	3.34014	1.2912	2.58685	0.00968588	0.0306784
207	VIT_203s0038g03530	8109.93	3.33614	0.273725	12.1879	3.61e-34	4.41e-32
208	VIT_219s0085g00010	9.1126	3.33526	1.02452	3.25543	0.0011322	0.00491076
209	VIT_212s0057g00060	12.9333	3.33443	1.1474	2.90606	0.0036601	0.0135234
210	VIT_218s0001g08420	9.07442	3.31986	1.05864	3.13597	0.00171289	0.0070314
211	VIT_204s0069g00390	347.269	3.3131	0.290304	11.4125	3.62e-30	3.44e-28
212	VIT_218s0041g02430	12.6179	3.31104	1.17585	2.81588	0.00486439	0.0171367
213	VIT_209s0002g04540	39.9168	3.3106	0.881713	3.75473	0.000173526	0.000936068
214	VIT_219s0014g01770	7.97602	3.30632	1.06504	3.10442	0.00190653	0.00771342
215	VIT_205s0020g03290	44.3626	3.30019	0.50926	6.48037	9.15e-11	1.54e-09
216	VIT_218s0001g10870	13.8496	3.28939	0.921432	3.56987	0.000357158	0.00176406
217	VIT_200s0144g00190	69.259	3.28823	0.496838	6.61832	3.63e-11	6.44e-10
218	VIT_218s0117g00340	47.5394	3.26907	0.444237	7.35884	1.86e-13	4.55e-12
219	VIT_214s0068g02150	188.062	3.25738	0.400698	8.12928	4.32e-16	1.42e-14
220	VIT_208s0007g05050	6.05228	3.25098	1.2459	2.60935	0.00907143	0.0289873
221	VIT_211s0016g05410	1192.77	3.23608	0.221242	14.6269	1.89e-48	5.39e-46
222	VIT_209s0054g00245	149.199	3.23036	0.447941	7.21156	5.53e-13	1.28e-11
223	VIT_205s0020g02830	39.8146	3.22908	0.43129	7.48701	7.05e-14	1.83e-12
224	VIT_216s0098g00510	479.218	3.21602	0.329869	9.7494	1.86e-22	1.08e-20
225	VIT_205s0049g01200	62.568	3.21457	0.52309	6.14536	7.98e-10	1.19e-08
226	VIT_205s0102g00170	7.88023	3.21235	1.33643	2.40367	0.0162313	0.0470585
227	VIT_204s0008g05750	33.2631	3.20927	0.608103	5.27751	1.31e-07	1.38e-06
228	VIT_202s0025g00330	387.592	3.20842	0.272572	11.7709	5.51e-32	6.01e-30
229	VIT_218s0166g00050	34.2533	3.20736	0.848458	3.78023	0.000156686	0.000854408
230	VIT_218s0001g13780	35.9526	3.20354	0.820029	3.90661	9.36e-05	0.000540844
231	VIT_216s0050g02760	12.8953	3.18876	1.01124	3.15332	0.00161424	0.00668105
232	VIT_212s0059g02320	18.5519	3.17395	0.82555	3.84465	0.000120723	0.000677469
233	VIT_205s0165g00090	8.41037	3.15081	1.16973	2.69362	0.0070681	0.0234742
234	VIT_200s0269g00180	41.2959	3.14372	0.847652	3.70874	0.000208297	0.00109666
235	VIT_203s0038g01580	10.069	3.13745	1.02303	3.06681	0.00216355	0.00859295
236	VIT_209s0002g00370	9.72493	3.12831	0.877198	3.56625	0.000362128	0.00178676
237	VIT_200s0338g00030	114.101	3.12566	0.435517	7.17689	7.13e-13	1.62e-11
238	VIT_213s0074g00340	24.7256	3.11799	0.757747	4.11482	3.87e-05	0.000246525
239	VIT_212s0059g01720	76.9328	3.11346	0.424641	7.33197	2.27e-13	5.47e-12
240	VIT_201s0026g01730	314.004	3.11113	0.325282	9.5644	1.13e-21	6.21e-20
241	VIT_205s0020g03710	731.482	3.10769	0.487321	6.37709	1.8e-10	2.92e-09
242	VIT_210s0003g01410	1200.12	3.10651	0.218858	14.1942	9.96e-46	2.23e-43
243	VIT_212s0028g01030	12.6041	3.10542	1.23593	2.51261	0.0119842	0.0366499
244	VIT_201s0011g02790	18.1413	3.0934	0.703713	4.39583	1.1e-05	7.91e-05
245	VIT_209s0054g00021	80.435	3.09322	0.41785	7.4027	1.33e-13	3.34e-12
246	VIT_209s0054g00080	10.6641	3.08898	1.15105	2.68363	0.00728279	0.024095
247	VIT_216s0039g02820	150.309	3.08829	0.424293	7.27867	3.37e-13	7.96e-12
248	VIT_216s0013g01066	60.615	3.08756	1.06777	2.89159	0.00383292	0.014061
249	VIT_205s0049g00100	137.473	3.08233	0.378335	8.1471	3.73e-16	1.23e-14
250	VIT_216s0022g00540	446.343	3.08044	0.240055	12.8322	1.08e-37	1.63e-35
251	VIT_216s0039g01310	536.481	3.07239	0.235747	13.0325	7.99e-39	1.29e-36
252	VIT_216s0100g00270	79.5762	3.07159	0.381378	8.05393	8.02e-16	2.53e-14
253	VIT_200s0258g00130	14.3812	3.06099	0.853179	3.58775	0.000333548	0.00166034
254	VIT_216s0050g01680	128.422	3.05951	0.307124	9.96179	2.24e-23	1.42e-21
255	VIT_201s0010g00800	19.2271	3.05258	0.710442	4.29673	1.73e-05	0.000118582
256	VIT_201s0150g00410	52.8993	3.04622	0.736588	4.13559	3.54e-05	0.000227527
257	VIT_200s0229g00090	24.8414	3.04407	0.560766	5.42841	5.69e-08	6.33e-07
258	VIT_200s0748g00020	104.215	3.04095	0.448317	6.78304	1.18e-11	2.27e-10
259	VIT_216s0148g00290	116.856	3.01933	0.336679	8.96797	3.02e-19	1.35e-17
260	VIT_208s0007g08910	13.366	3.00813	0.871004	3.45363	0.000553097	0.0026128
261	VIT_202s0025g04320	32.3946	3.00609	0.578914	5.19264	2.07e-07	2.1e-06
262	VIT_212s0028g01870	6.75707	3.00037	1.26205	2.37737	0.0174365	0.0499982
263	VIT_204s0008g00150	67.8379	2.99793	0.404361	7.41398	1.23e-13	3.1e-12
264	VIT_218s0041g00040	53.2663	2.99699	0.637426	4.70171	2.58e-06	2.1e-05
265	VIT_208s0058g00690	3650.63	2.99673	0.252305	11.8774	1.55e-32	1.72e-30
266	VIT_209s0002g07620	43.7187	2.99666	0.417547	7.17682	7.13e-13	1.62e-11
267	VIT_213s0019g04060	504.637	2.98466	0.298865	9.98665	1.74e-23	1.11e-21
268	VIT_219s0014g01760	10.1279	2.97086	0.784394	3.78746	0.000152196	0.000833496
269	VIT_216s0050g00930	522.127	2.96635	0.242537	12.2305	2.14e-34	2.66e-32
270	VIT_208s0040g00480	6.5699	2.96524	1.1053	2.68275	0.00730201	0.0241335
271	VIT_219s0014g03180	10.7421	2.96126	1.14913	2.57695	0.00996753	0.0313881
272	VIT_201s0026g00900	372.567	2.95617	0.52011	5.68374	1.32e-08	1.62e-07
273	VIT_200s0353g00055	15.4368	2.95339	0.937088	3.15167	0.00162338	0.00671745
274	VIT_212s0034g01350	75.4312	2.9512	0.322803	9.14241	6.11e-20	2.91e-18
275	VIT_209s0018g00620	204.109	2.9354	0.374472	7.83876	4.55e-15	1.33e-13
276	VIT_204s0023g03470	1065.63	2.93348	0.465496	6.30185	2.94e-10	4.61e-09
277	VIT_210s0042g00700	523.437	2.92647	0.343224	8.52642	1.51e-17	5.85e-16
278	VIT_217s0000g02360	152.247	2.92597	0.350781	8.34129	7.35e-17	2.64e-15
279	VIT_218s0041g02410	36.5524	2.92224	0.710372	4.11367	3.89e-05	0.000247667
280	VIT_213s0067g00630	7.39081	2.91978	1.15931	2.51854	0.0117842	0.0361483
281	VIT_205s0102g01070	8.67401	2.91911	1.03361	2.82418	0.00474018	0.0167859
282	VIT_203s0017g01990	54.762	2.91762	0.571247	5.10746	3.27e-07	3.19e-06
283	VIT_213s0074g00760	66.1777	2.91704	0.472774	6.17005	6.83e-10	1.03e-08
284	VIT_216s0148g00360	41.1369	2.91588	0.522448	5.58118	2.39e-08	2.83e-07
285	VIT_218s0089g00680	38.1536	2.90789	0.59846	4.85895	1.18e-06	1.04e-05
286	VIT_200s0233g00030	45.6098	2.90545	0.531836	5.46305	4.68e-08	5.26e-07
287	VIT_218s0001g13200	13.2705	2.90068	1.0249	2.8302	0.00465184	0.0165222
288	VIT_200s0144g00120	291.984	2.89011	0.378981	7.626	2.42e-14	6.52e-13
289	VIT_209s0054g00260	10.2725	2.88806	1.0028	2.88	0.0039768	0.014507
290	VIT_203s0038g03950	60.3948	2.88731	0.429007	6.73022	1.69e-11	3.2e-10
291	VIT_200s0406g00010	52.8183	2.88563	0.634666	4.54669	5.45e-06	4.17e-05
292	VIT_204s0023g03230	8.71909	2.88456	1.03113	2.79747	0.00515043	0.0180081
293	VIT_218s0001g03620	662.406	2.88025	0.28668	10.0469	9.48e-24	6.13e-22
294	VIT_204s0023g02880	19.6878	2.87157	0.831688	3.45271	0.000554988	0.00262108
295	VIT_215s0024g00980	14.7536	2.86674	0.791322	3.62272	0.000291518	0.00147303
296	VIT_212s0034g02530	387.205	2.86118	0.252412	11.3354	8.77e-30	8.08e-28
297	VIT_206s0004g07410	23.0553	2.85549	0.894729	3.19146	0.00141557	0.00594782
298	VIT_206s0009g00230	113.266	2.85289	0.371007	7.68958	1.48e-14	4.04e-13
299	VIT_210s0092g00510	12.985	2.85157	1.0593	2.69193	0.00710391	0.0235767
300	VIT_203s0017g00900	11.2656	2.85093	1.15354	2.47146	0.0134564	0.0403059
301	VIT_202s0025g01350	7.58453	2.84909	1.13419	2.512	0.0120047	0.0367009
302	VIT_201s0011g06290	331.492	2.84615	0.270092	10.5377	5.79e-26	4.25e-24
303	VIT_215s0046g02000	67.048	2.84573	0.417074	6.82308	8.91e-12	1.74e-10
304	VIT_208s0040g02170	213.953	2.8378	0.387042	7.33202	2.27e-13	5.47e-12
305	VIT_214s0128g00790	696.235	2.83048	0.238791	11.8534	2.07e-32	2.27e-30
306	VIT_210s0003g00230	14.1199	2.83017	1.00098	2.8274	0.0046928	0.0166459
307	VIT_205s0020g03030	352.474	2.83001	0.258255	10.9582	6.07e-28	5.08e-26
308	VIT_209s0054g01220	1398.73	2.82322	0.436696	6.46496	1.01e-10	1.7e-09
309	VIT_216s0098g00030	353.226	2.82089	0.275623	10.2346	1.39e-24	9.63e-23
310	VIT_210s0003g00480	81.3813	2.81771	0.435272	6.47344	9.58e-11	1.61e-09
311	VIT_201s0010g03210	80.729	2.81541	0.605562	4.64925	3.33e-06	2.65e-05
312	VIT_213s0067g00220	86.1886	2.81463	0.419293	6.7128	1.91e-11	3.57e-10
313	VIT_219s0015g01543	492.507	2.81282	0.354958	7.92438	2.29e-15	6.91e-14
314	VIT_207s0005g00170	23.3015	2.81161	0.626899	4.48496	7.29e-06	5.43e-05
315	VIT_201s0146g00180	72.6559	2.81082	0.449999	6.2463	4.2e-10	6.49e-09
316	VIT_207s0151g01070	94.7115	2.80996	0.427563	6.57204	4.96e-11	8.62e-10
317	VIT_218s0166g00230	39.4603	2.80595	0.476715	5.88602	3.96e-09	5.25e-08
318	VIT_210s0116g00430	147.416	2.79836	0.27111	10.3219	5.61e-25	4e-23
319	VIT_208s0007g01650	1853.48	2.79692	0.198896	14.0622	6.48e-45	1.39e-42
320	VIT_200s0459g00020	7.3621	2.78691	1.10207	2.52879	0.0114458	0.0352518
321	VIT_214s0006g01250	257.612	2.78645	0.296949	9.38361	6.37e-21	3.3e-19
322	VIT_205s0020g01800	192.175	2.78382	0.257676	10.8036	3.31e-27	2.64e-25
323	VIT_208s0007g01090	1638.29	2.78167	0.22138	12.5651	3.28e-36	4.51e-34
324	VIT_210s0003g00780	488.466	2.77128	0.278289	9.95828	2.32e-23	1.46e-21
325	VIT_212s0035g01190	9.9191	2.77112	0.931925	2.97354	0.00294384	0.0112001
326	VIT_214s0108g00980	631.832	2.76674	0.185548	14.9111	2.79e-50	8.72e-48
327	VIT_215s0021g00850	8.74065	2.76539	1.09951	2.51511	0.0118996	0.0364536
328	VIT_212s0028g01860	171.027	2.76178	0.410639	6.72558	1.75e-11	3.29e-10
329	VIT_200s0179g00370	77.1834	2.75812	0.524281	5.26077	1.43e-07	1.5e-06
330	VIT_200s0424g00030	41.2955	2.75155	0.638075	4.31226	1.62e-05	0.000111267
331	VIT_200s0324g00060	90.3603	2.7383	0.539376	5.0768	3.84e-07	3.7e-06
332	VIT_218s0089g00690	69.404	2.73751	0.38613	7.08961	1.34e-12	2.95e-11
333	VIT_214s0066g02110	12.9082	2.73702	1.09914	2.49014	0.0127694	0.0385749
334	VIT_209s0070g00140	236.794	2.73076	0.284242	9.60718	7.46e-22	4.16e-20
335	VIT_208s0007g04770	105.986	2.7301	0.425873	6.41059	1.45e-10	2.39e-09
336	VIT_204s0008g01150	8.50204	2.72512	1.00058	2.72355	0.00645851	0.0217488
337	VIT_209s0002g03920	14.204	2.72379	0.903403	3.01503	0.00256951	0.00997077
338	VIT_212s0059g01900	13.8675	2.72218	0.871507	3.12353	0.00178695	0.00730244
339	VIT_212s0035g00006	10.173	2.71984	1.00708	2.70073	0.0069188	0.0230707
340	VIT_201s0011g01810	51.9985	2.71432	0.52426	5.17743	2.25e-07	2.26e-06
341	VIT_214s0128g00780	1495.77	2.71427	0.260843	10.4057	2.33e-25	1.67e-23
342	VIT_212s0059g01400	71.4182	2.71179	0.514762	5.26804	1.38e-07	1.44e-06
343	VIT_201s0127g00360	117.751	2.69921	0.367264	7.34949	1.99e-13	4.86e-12
344	VIT_204s0008g07150	2102.75	2.69823	0.274014	9.84706	7.06e-23	4.22e-21
345	VIT_204s0044g00270	34.5913	2.69778	0.785259	3.43552	0.00059141	0.00276843
346	VIT_212s0059g01580	153.432	2.69479	0.311306	8.65639	4.87e-18	1.96e-16
347	VIT_201s0026g02330	59.4735	2.69405	0.380392	7.08231	1.42e-12	3.1e-11
348	VIT_202s0236g00100	697.166	2.69026	0.345067	7.79635	6.37e-15	1.84e-13
349	VIT_219s0014g02120	35.6549	2.69006	0.570042	4.71906	2.37e-06	1.94e-05
350	VIT_213s0019g01240	199.275	2.68495	0.333821	8.04309	8.76e-16	2.74e-14
351	VIT_208s0007g02100	90.1383	2.6835	0.37499	7.1562	8.29e-13	1.88e-11
352	VIT_202s0012g01270	12.521	2.67888	1.00917	2.65453	0.00794191	0.0259073
353	VIT_207s0005g03260	119.623	2.66783	0.864552	3.0858	0.00203004	0.00813039
354	VIT_200s0409g00010	112.24	2.66743	0.365729	7.29347	3.02e-13	7.18e-12
355	VIT_216s0039g01880	5.58178	2.66726	1.00955	2.64204	0.0082408	0.0267405
356	VIT_216s0050g01890	11.7976	2.66243	0.984471	2.70443	0.00684215	0.0228311
357	VIT_209s0002g09276	39.8234	2.65827	0.617302	4.30628	1.66e-05	0.000113989
358	VIT_200s1217g00020	17.1441	2.65826	1.0438	2.54672	0.0108739	0.0338238
359	VIT_210s0003g00790	1944.06	2.65747	0.206783	12.8515	8.44e-38	1.28e-35
360	VIT_204s0008g07170	21.8538	2.65739	0.831226	3.19695	0.00138889	0.0058499
361	VIT_204s0008g03530	328.02	2.65393	0.293662	9.03736	1.61e-19	7.38e-18
362	VIT_213s0019g04070	2389.69	2.64843	0.151913	17.4339	4.56e-68	3.35e-65
363	VIT_204s0044g00680	13.0988	2.64483	0.885927	2.98538	0.00283225	0.010836
364	VIT_201s0150g00370	98.6633	2.63883	0.425783	6.19758	5.73e-10	8.71e-09
365	VIT_201s0011g02320	2049.3	2.63767	0.219197	12.0334	2.37e-33	2.74e-31
366	VIT_200s0144g00265	20.9377	2.63104	0.706527	3.72391	0.000196159	0.0010437
367	VIT_213s0019g04910	77.1506	2.62936	0.36761	7.15258	8.52e-13	1.92e-11
368	VIT_202s0109g00420	8.7085	2.62852	1.04556	2.51398	0.0119377	0.036537
369	VIT_207s0151g00440	17.1396	2.62665	0.935336	2.80824	0.00498129	0.0174904
370	VIT_218s0122g00240	212.805	2.62532	0.185058	14.1864	1.11e-45	2.47e-43
371	VIT_209s0054g00193	17.0965	2.61039	0.836299	3.12136	0.0018002	0.00734869
372	VIT_204s0079g00410	1203.83	2.60889	0.201331	12.9582	2.11e-38	3.33e-36
373	VIT_201s0011g03070	4604.62	2.60068	0.252251	10.3099	6.36e-25	4.51e-23
374	VIT_214s0108g01250	18.7594	2.59043	0.934879	2.77087	0.00559066	0.0192858
375	VIT_200s0256g00030	21.1247	2.588	0.599378	4.31781	1.58e-05	0.00010902
376	VIT_201s0011g00990	508.445	2.58761	0.349398	7.40592	1.3e-13	3.27e-12
377	VIT_215s0048g01350	94.7263	2.58587	0.569139	4.54348	5.53e-06	4.22e-05
378	VIT_216s0039g01070	195.321	2.58584	0.499774	5.17401	2.29e-07	2.3e-06
379	VIT_218s0001g14560	19.5488	2.58369	0.687531	3.75792	0.000171333	0.000926072
380	VIT_212s0121g00230	50.4863	2.57936	1.0278	2.50959	0.0120872	0.0369174
381	VIT_207s0031g01070	76.5222	2.57032	0.543851	4.72614	2.29e-06	1.88e-05
382	VIT_217s0000g03960	19.4797	2.56981	0.923683	2.78214	0.0054002	0.018744
383	VIT_216s0039g01330	1488.83	2.5653	0.190976	13.4326	3.89e-41	7.08e-39
384	VIT_204s0008g00310	21.8925	2.56496	0.631086	4.06436	4.82e-05	0.000300126
385	VIT_200s0294g00010	22.4422	2.55925	0.662604	3.86241	0.000112274	0.00063397
386	VIT_204s0008g07250	710.244	2.55217	0.325162	7.8489	4.2e-15	1.23e-13
387	VIT_218s0075g00530	21.5391	2.54897	0.909162	2.80364	0.0050529	0.0176995
388	VIT_210s0003g00760	1455.55	2.53989	0.19845	12.7987	1.67e-37	2.49e-35
389	VIT_219s0090g01800	34.3585	2.53714	0.707085	3.58817	0.000333002	0.00165806
390	VIT_216s0050g01530	1660.59	2.53324	0.24908	10.1704	2.69e-24	1.79e-22
391	VIT_209s0002g02680	70.769	2.53275	0.431495	5.86969	4.37e-09	5.76e-08
392	VIT_200s0179g00320	291.914	2.53009	0.263746	9.59287	8.57e-22	4.75e-20
393	VIT_208s0007g06030	131.311	2.52842	0.384627	6.57371	4.91e-11	8.54e-10
394	VIT_203s0038g00690	499.808	2.5269	0.176837	14.2894	2.55e-46	6.07e-44
395	VIT_214s0108g01020	28.7372	2.52163	0.802364	3.14275	0.00167369	0.00690314
396	VIT_217s0000g08720	153.079	2.51337	0.342834	7.33116	2.28e-13	5.5e-12
397	VIT_218s0001g11430	13.0425	2.51153	1.01801	2.46708	0.0136219	0.0407311
398	VIT_209s0002g03070	25.0577	2.5044	0.66333	3.7755	0.000159685	0.000869023
399	VIT_218s0001g06400	296.371	2.50067	0.353791	7.06822	1.57e-12	3.41e-11
400	VIT_213s0019g02010	12.4462	2.49698	1.03491	2.41274	0.015833	0.046107
401	VIT_204s0043g00370	904.518	2.49435	0.4741	5.26123	1.43e-07	1.49e-06
402	VIT_201s0026g00200	32.8371	2.49211	0.930725	2.6776	0.00741518	0.0244427
403	VIT_218s0001g12860	41.9048	2.48587	0.584303	4.25443	2.1e-05	0.000141154
404	VIT_200s0220g00180	503.616	2.4843	0.304118	8.16887	3.11e-16	1.03e-14
405	VIT_206s0004g08230	3386.46	2.48318	0.171735	14.4593	2.19e-47	5.57e-45
406	VIT_205s0029g00690	181.366	2.48219	0.332958	7.45496	8.99e-14	2.31e-12
407	VIT_200s0480g00010	37.3171	2.47997	0.716002	3.46364	0.000532914	0.00252872
408	VIT_217s0000g06920	14.2703	2.4796	0.846283	2.92999	0.00338974	0.0126692
409	VIT_209s0054g01520	15.3155	2.47686	0.748885	3.3074	0.000941652	0.00416678
410	VIT_208s0007g05030	47.9096	2.4757	0.421679	5.87106	4.33e-09	5.72e-08
411	VIT_200s0226g00045	180.948	2.47373	0.37011	6.68377	2.33e-11	4.29e-10
412	VIT_213s0019g04880	215.743	2.47373	0.335949	7.36339	1.79e-13	4.43e-12
413	VIT_215s0048g01365	211.511	2.47241	0.366121	6.75297	1.45e-11	2.76e-10
414	VIT_219s0015g02415	14.2896	2.47153	0.949283	2.60357	0.00922575	0.0293918
415	VIT_201s0011g02680	13.1266	2.47129	0.916683	2.69591	0.00701975	0.0233457
416	VIT_218s0001g00840	41.3322	2.46883	0.681972	3.62013	0.000294454	0.00148551
417	VIT_207s0141g00930	89.8998	2.46748	0.569337	4.33395	1.46e-05	0.000102136
418	VIT_205s0020g02770	3295.04	2.46721	0.190012	12.9845	1.5e-38	2.38e-36
419	VIT_218s0001g15650	13.9144	2.46507	0.938942	2.62537	0.0086555	0.02784
420	VIT_218s0001g12430	375.653	2.4617	0.27998	8.7924	1.46e-18	6.13e-17
421	VIT_208s0007g04790	1439.38	2.46132	0.387292	6.3552	2.08e-10	3.34e-09
422	VIT_217s0000g04370	283.948	2.46053	0.299416	8.21778	2.07e-16	7.09e-15
423	VIT_211s0118g00360	262.822	2.45819	0.272553	9.01911	1.9e-19	8.61e-18
424	VIT_212s0028g03520	75.4288	2.45381	0.401795	6.10712	1.01e-09	1.49e-08
425	VIT_216s0039g01060	155.67	2.45243	0.315646	7.76957	7.88e-15	2.26e-13
426	VIT_212s0055g01030	86.3196	2.4498	0.543484	4.50759	6.56e-06	4.93e-05
427	VIT_212s0028g02210	177.875	2.44866	0.265542	9.22137	2.93e-20	1.43e-18
428	VIT_213s0019g05010	84.2644	2.44264	0.422701	5.77865	7.53e-09	9.6e-08
429	VIT_218s0001g05370	8.792	2.44139	0.973322	2.50831	0.0121311	0.0370339
430	VIT_219s0015g00870	23.6806	2.43959	0.848819	2.8741	0.00405176	0.0147421
431	VIT_216s0148g00140	253.139	2.42932	0.290698	8.35684	6.44e-17	2.33e-15
432	VIT_206s0004g00065	15.2361	2.42731	0.881624	2.75322	0.00590118	0.0201819
433	VIT_202s0025g00540	18.2641	2.42545	0.790019	3.07011	0.00213978	0.00850919
434	VIT_203s0063g00530	85.7822	2.42506	0.533532	4.54529	5.49e-06	4.19e-05
435	VIT_210s0003g00680	1263.38	2.42461	0.221876	10.9278	8.49e-28	7.01e-26
436	VIT_204s0069g00200	12.5489	2.42245	0.748653	3.23575	0.00121325	0.00520432
437	VIT_209s0054g00365	91.4741	2.4222	0.473718	5.11316	3.17e-07	3.11e-06
438	VIT_211s0118g00310	73.5261	2.42215	0.292728	8.27442	1.29e-16	4.53e-15
439	VIT_217s0000g08240	31.4899	2.42019	0.591014	4.09498	4.22e-05	0.000267095
440	VIT_209s0002g07720	71.6203	2.41934	0.437885	5.52505	3.29e-08	3.8e-07
441	VIT_201s0011g03390	128.891	2.41811	0.343456	7.04051	1.92e-12	4.1e-11
442	VIT_210s0042g00770	177.393	2.41141	0.364121	6.62255	3.53e-11	6.29e-10
443	VIT_211s0016g01860	21.3859	2.4052	0.799356	3.00893	0.00262173	0.0101445
444	VIT_209s0054g00205	60.6108	2.40455	0.499084	4.81793	1.45e-06	1.25e-05
445	VIT_216s0098g00200	830.463	2.40289	0.216363	11.1058	1.18e-28	1.02e-26
446	VIT_206s0009g01660	19.8432	2.4028	0.695615	3.45421	0.0005519	0.00260779
447	VIT_208s0040g01470	897.819	2.40179	0.199459	12.0415	2.15e-33	2.53e-31
448	VIT_201s0010g03126	34.9541	2.40174	0.584116	4.11175	3.93e-05	0.000249652
449	VIT_218s0001g11470	376.663	2.39948	0.698667	3.43437	0.000593923	0.00277883
450	VIT_214s0081g00350	39.8389	2.39659	0.570895	4.19795	2.69e-05	0.00017764
451	VIT_200s0388g00090	142.546	2.39353	0.407818	5.86911	4.38e-09	5.78e-08
452	VIT_209s0002g03020	313.002	2.3918	0.339577	7.04346	1.88e-12	4.02e-11
453	VIT_206s0004g04000	45.4111	2.38608	0.474371	5.02999	4.91e-07	4.63e-06
454	VIT_216s0039g01120	191.374	2.38413	0.367982	6.47894	9.24e-11	1.56e-09
455	VIT_209s0002g01310	185.843	2.37096	0.434166	5.46094	4.74e-08	5.32e-07
456	VIT_219s0014g04090	355.347	2.3699	0.288324	8.21958	2.04e-16	7e-15
457	VIT_205s0051g00930	42.3751	2.36806	0.430093	5.50593	3.67e-08	4.22e-07
458	VIT_204s0008g06700	136.982	2.36101	0.304664	7.74953	9.22e-15	2.6e-13
459	VIT_202s0012g00550	1989.8	2.35894	0.165527	14.251	4.42e-46	1.02e-43
460	VIT_219s0015g00320	1348.11	2.34916	0.210973	11.1349	8.48e-29	7.46e-27
461	VIT_202s0241g00020	41.2336	2.34731	0.656353	3.57629	0.000348506	0.00172401
462	VIT_204s0069g00010	314.44	2.3395	0.211053	11.0849	1.49e-28	1.28e-26
463	VIT_212s0057g00410	21.1871	2.33796	0.549285	4.25637	2.08e-05	0.000140031
464	VIT_218s0001g06140	18.2247	2.3354	0.821009	2.84454	0.0044475	0.0158881
465	VIT_206s0009g00370	51.9429	2.33126	0.618492	3.76926	0.000163734	0.000889532
466	VIT_206s0004g01300	42.4076	2.32958	0.718264	3.24334	0.00118137	0.0050893
467	VIT_218s0001g08340	11.6702	2.32928	0.700909	3.32322	0.000889836	0.00396499
468	VIT_203s0091g00480	379.798	2.32535	0.200888	11.5753	5.5e-31	5.7e-29
469	VIT_200s0388g00050	383.536	2.32283	0.261366	8.8873	6.26e-19	2.7e-17
470	VIT_200s0398g00020	88.0703	2.31986	0.401534	5.77749	7.58e-09	9.66e-08
471	VIT_204s0069g00740	41.407	2.3185	0.542497	4.27376	1.92e-05	0.000130461
472	VIT_213s0067g03430	118.723	2.31492	0.493616	4.68973	2.74e-06	2.21e-05
473	VIT_200s0324g00050	280.346	2.31443	0.422682	5.47559	4.36e-08	4.94e-07
474	VIT_216s0039g01560	420.503	2.31223	0.242617	9.5304	1.57e-21	8.49e-20
475	VIT_205s0077g00520	182.714	2.31021	0.379299	6.09072	1.12e-09	1.64e-08
476	VIT_200s0246g00200	66.7309	2.30932	0.746838	3.09214	0.00198722	0.0079857
477	VIT_205s0062g01160	1069.56	2.30207	0.412781	5.57698	2.45e-08	2.89e-07
478	VIT_212s0057g00780	40.7238	2.30087	0.656953	3.50233	0.000461201	0.00222215
479	VIT_203s0063g00880	800.279	2.30009	0.434753	5.29057	1.22e-07	1.29e-06
480	VIT_218s0075g00700	138.529	2.29843	0.800269	2.87207	0.00407788	0.0148258
481	VIT_204s0044g00040	126.479	2.29841	0.390342	5.88818	3.9e-09	5.19e-08
482	VIT_211s0065g00350	139.354	2.29685	0.461448	4.97749	6.44e-07	5.91e-06
483	VIT_214s0060g00490	13.8221	2.29662	0.85072	2.69962	0.00694194	0.0231236
484	VIT_218s0001g04640	75.6609	2.29361	0.485534	4.72388	2.31e-06	1.9e-05
485	VIT_214s0068g01920	54.9979	2.29211	0.629849	3.63915	0.000273542	0.00139619
486	VIT_200s2254g00010	92.4553	2.28896	0.614742	3.72344	0.000196524	0.00104466
487	VIT_218s0001g12450	46.0205	2.28891	0.559796	4.08883	4.34e-05	0.00027304
488	VIT_219s0014g04930	300.26	2.28828	0.358396	6.38479	1.72e-10	2.79e-09
489	VIT_211s0052g00240	109.381	2.28649	0.36092	6.33518	2.37e-10	3.77e-09
490	VIT_213s0067g00240	24.0803	2.27841	0.836837	2.72265	0.00647607	0.0217925
491	VIT_212s0028g01920	21.9985	2.27704	0.633391	3.59501	0.000324385	0.0016198
492	VIT_203s0097g00110	40.8345	2.27645	0.56301	4.04335	5.27e-05	0.000325258
493	VIT_204s0008g05390	138.704	2.27494	0.699124	3.25398	0.00113798	0.00492687
494	VIT_215s0021g00890	19.3641	2.27327	0.844098	2.69313	0.00707837	0.0235009
495	VIT_200s0975g00020	13.2965	2.27203	0.941232	2.41389	0.0157832	0.0459868
496	VIT_217s0000g03380	281.662	2.27001	0.243492	9.32271	1.13e-20	5.77e-19
497	VIT_213s0074g00350	14.2117	2.26867	0.95252	2.38175	0.0172304	0.0494892
498	VIT_214s0030g00540	22.0966	2.26863	0.517884	4.38057	1.18e-05	8.43e-05
499	VIT_218s0041g00700	243.362	2.26769	0.294333	7.7045	1.31e-14	3.6e-13
500	VIT_201s0011g04240	51.3954	2.26738	0.504991	4.48994	7.12e-06	5.32e-05
501	VIT_218s0089g00700	72.8544	2.26671	0.599175	3.78305	0.000154917	0.000846676
502	VIT_213s0084g00140	50.7557	2.26656	0.409383	5.53652	3.09e-08	3.57e-07
503	VIT_201s0026g00470	47.0257	2.26648	0.488476	4.63991	3.49e-06	2.76e-05
504	VIT_201s0010g03296	85.1491	2.26634	0.525912	4.30935	1.64e-05	0.000112498
505	VIT_218s0001g11620	28.6023	2.26458	0.631579	3.58559	0.000336313	0.00167324
506	VIT_206s0080g00150	45.221	2.26076	0.512473	4.41147	1.03e-05	7.42e-05
507	VIT_208s0040g01930	164.26	2.25954	0.35537	6.35828	2.04e-10	3.28e-09
508	VIT_218s0001g06260	22.7737	2.25253	0.65089	3.4607	0.000538782	0.00255339
509	VIT_208s0056g01230	25.6746	2.25012	0.687977	3.27064	0.00107306	0.00468705
510	VIT_219s0014g00960	213.818	2.24638	0.268748	8.35871	6.34e-17	2.3e-15
511	VIT_219s0090g00600	31.9419	2.24621	0.626932	3.58285	0.000339865	0.0016887
512	VIT_214s0030g01800	217.839	2.24543	0.219862	10.2129	1.74e-24	1.19e-22
513	VIT_218s0001g00610	42.281	2.24249	0.563926	3.97657	6.99e-05	0.000416488
514	VIT_201s0010g03122	408.272	2.24102	0.303529	7.38321	1.55e-13	3.84e-12
515	VIT_218s0089g01330	21.0381	2.24055	0.759188	2.95124	0.00316501	0.0119274
516	VIT_201s0010g03293	486.509	2.2389	0.322884	6.93407	4.09e-12	8.43e-11
517	VIT_206s0004g06430	28.2074	2.23557	0.55197	4.05017	5.12e-05	0.000317059
518	VIT_200s0340g00060	60.7862	2.23448	0.396248	5.63911	1.71e-08	2.06e-07
519	VIT_214s0083g00580	2301.41	2.23356	0.147703	15.122	1.16e-51	3.95e-49
520	VIT_203s0017g00920	275.264	2.22838	0.286942	7.76596	8.1e-15	2.31e-13
521	VIT_216s0050g00390	2680.23	2.22555	0.19865	11.2034	3.93e-29	3.48e-27
522	VIT_200s0533g00010	35.3194	2.22292	0.84836	2.62026	0.00878627	0.0281846
523	VIT_218s0001g11520	105.831	2.22259	0.799326	2.78058	0.00542613	0.0188107
524	VIT_214s0081g00780	39.4296	2.22225	0.523463	4.24529	2.18e-05	0.000146411
525	VIT_200s0246g00230	27.1223	2.22018	0.757559	2.9307	0.00338202	0.0126453
526	VIT_208s0007g05810	294.716	2.21694	0.354809	6.24827	4.15e-10	6.42e-09
527	VIT_200s2588g00010	129.632	2.21464	0.490853	4.51181	6.43e-06	4.84e-05
528	VIT_214s0006g01610	28.8312	2.21385	0.622368	3.55714	0.000374919	0.00184415
529	VIT_212s0057g00950	152.103	2.2128	0.346939	6.37807	1.79e-10	2.91e-09
530	VIT_219s0014g04050	38.4657	2.21257	0.498538	4.43812	9.07e-06	6.64e-05
531	VIT_200s0179g00360	220.011	2.21091	0.272586	8.11087	5.03e-16	1.63e-14
532	VIT_218s0122g00450	120.463	2.20752	0.751784	2.93638	0.00332072	0.0124405
533	VIT_207s0005g02100	500.816	2.20701	0.298334	7.39778	1.38e-13	3.46e-12
534	VIT_205s0049g00930	419.28	2.20696	0.277071	7.96532	1.65e-15	5.03e-14
535	VIT_205s0094g01530	59.4286	2.20662	0.417519	5.28508	1.26e-07	1.32e-06
536	VIT_214s0066g01810	1708.24	2.20563	0.247039	8.92826	4.33e-19	1.89e-17
537	VIT_206s0009g02660	15.0995	2.20457	0.746005	2.95517	0.00312494	0.0117908
538	VIT_200s0404g00050	692.366	2.20271	0.293271	7.51083	5.88e-14	1.53e-12
539	VIT_208s0007g01040	197.764	2.2012	0.258992	8.49911	1.91e-17	7.31e-16
540	VIT_200s0413g00010	13.6037	2.19708	0.897011	2.44933	0.0143123	0.0423981
541	VIT_200s0276g00085	187.416	2.19673	0.397346	5.52852	3.23e-08	3.73e-07
542	VIT_219s0015g02410	166.341	2.1938	0.344978	6.35924	2.03e-10	3.27e-09
543	VIT_200s2526g00010	91.9002	2.18971	0.402161	5.44486	5.18e-08	5.78e-07
544	VIT_218s0001g04280	200.469	2.18912	0.689003	3.17723	0.00148688	0.00620991
545	VIT_205s0020g01395	75.4307	2.18872	0.507799	4.3102	1.63e-05	0.000112187
546	VIT_207s0031g01010	38.372	2.18813	0.562615	3.88921	0.000100573	0.000576257
547	VIT_206s0080g00780	1504.29	2.18783	0.270014	8.10266	5.38e-16	1.74e-14
548	VIT_211s0149g00400	16.246	2.18779	0.633262	3.45479	0.000550712	0.00260282
549	VIT_212s0028g01410	1381.18	2.18365	0.261757	8.34228	7.29e-17	2.62e-15
550	VIT_218s0001g03910	5826.73	2.18283	0.280402	7.78464	6.99e-15	2.01e-13
551	VIT_216s0148g00130	416.724	2.18275	0.316338	6.90007	5.2e-12	1.05e-10
552	VIT_208s0007g02520	72.3083	2.18243	0.48591	4.49142	7.07e-06	5.29e-05
553	VIT_209s0054g00910	77.8268	2.17503	0.428587	5.07488	3.88e-07	3.73e-06
554	VIT_209s0002g00700	194.956	2.16878	0.300305	7.22191	5.13e-13	1.19e-11
555	VIT_219s0014g04060	151.291	2.16261	0.325723	6.63942	3.15e-11	5.69e-10
556	VIT_216s0098g00210	57.9172	2.16155	0.59755	3.61736	0.000297624	0.00149872
557	VIT_200s0294g00100	36.9795	2.15716	0.539412	3.9991	6.36e-05	0.00038331
558	VIT_216s0050g00200	51.603	2.15495	0.448578	4.80395	1.56e-06	1.33e-05
559	VIT_216s0050g01700	813.903	2.15375	0.188701	11.4136	3.58e-30	3.41e-28
560	VIT_206s0004g06850	25.2403	2.15066	0.684685	3.1411	0.00168317	0.00693627
561	VIT_218s0041g01400	42.9058	2.1494	0.384074	5.59632	2.19e-08	2.6e-07
562	VIT_216s0148g00040	170.728	2.14799	0.352479	6.09397	1.1e-09	1.61e-08
563	VIT_217s0000g02950	1708.43	2.14235	0.156656	13.6755	1.42e-42	2.74e-40
564	VIT_217s0000g04400	526.056	2.14044	0.203793	10.503	8.37e-26	6.12e-24
565	VIT_207s0205g00030	222.502	2.13798	0.291459	7.33544	2.21e-13	5.36e-12
566	VIT_204s0044g01150	57.0487	2.13791	0.667185	3.20437	0.00135356	0.00571244
567	VIT_201s0146g00350	232.18	2.13496	0.856567	2.49246	0.0126862	0.0383784
568	VIT_208s0007g02810	30.1907	2.13466	0.644966	3.30972	0.0009339	0.00414102
569	VIT_217s0000g04880	198.815	2.13268	0.383676	5.55854	2.72e-08	3.19e-07
570	VIT_202s0033g00870	80.952	2.13025	0.448917	4.74532	2.08e-06	1.73e-05
571	VIT_214s0068g02300	13.7758	2.12963	0.805583	2.64359	0.00820331	0.026637
572	VIT_218s0001g05400	180.885	2.12676	0.318035	6.68719	2.27e-11	4.21e-10
573	VIT_207s0031g01040	57.4742	2.12601	0.563555	3.77249	0.000161628	0.000878844
574	VIT_200s1927g00020	48.2681	2.126	0.513094	4.14349	3.42e-05	0.000220938
575	VIT_203s0038g02450	18.9498	2.1227	0.640866	3.31223	0.000925557	0.00411071
576	VIT_205s0049g00950	47.1798	2.12206	0.644475	3.29269	0.000992337	0.00436564
577	VIT_205s0020g02500	1840.19	2.12163	0.167423	12.6723	8.43e-37	1.23e-34
578	VIT_202s0025g03070	32.4737	2.12042	0.669948	3.16504	0.0015506	0.00644563
579	VIT_204s0079g00630	18.5805	2.12041	0.755908	2.80511	0.00502991	0.0176449
580	VIT_208s0058g00790	16.0728	2.11757	0.866848	2.44284	0.014572	0.0430261
581	VIT_209s0002g07680	139.571	2.11704	0.385255	5.49517	3.9e-08	4.47e-07
582	VIT_203s0132g00380	47.3797	2.1135	0.442597	4.77523	1.8e-06	1.51e-05
583	VIT_211s0016g01640	63.8905	2.11327	0.544624	3.88023	0.000104356	0.000594861
584	VIT_215s0024g01670	62.4287	2.11111	0.685142	3.08127	0.00206123	0.00823973
585	VIT_212s0028g00860	298.45	2.11089	0.365545	5.77464	7.71e-09	9.8e-08
586	VIT_201s0010g03255	122.257	2.11009	0.359538	5.86891	4.39e-09	5.78e-08
587	VIT_213s0047g00822	31.3107	2.11002	0.798141	2.64367	0.00820127	0.0266349
588	VIT_200s0340g00050	293.453	2.10979	0.33178	6.35901	2.03e-10	3.27e-09
589	VIT_200s0211g00030	27.1751	2.10924	0.877704	2.40313	0.0162555	0.0471001
590	VIT_208s0040g02760	696.401	2.10378	0.204557	10.2846	8.27e-25	5.82e-23
591	VIT_211s0103g00520	49.5867	2.10124	0.518196	4.05492	5.02e-05	0.000311391
592	VIT_200s0425g00040	191.499	2.09719	0.267069	7.8526	4.07e-15	1.2e-13
593	VIT_218s0001g00550	79.9265	2.09686	0.381775	5.49239	3.97e-08	4.53e-07
594	VIT_217s0000g03390	1685.1	2.09542	0.371562	5.63948	1.71e-08	2.06e-07
595	VIT_213s0019g05070	588.202	2.09492	0.294788	7.10653	1.19e-12	2.64e-11
596	VIT_215s0021g01630	28.9546	2.09275	0.782028	2.67606	0.00744942	0.0245188
597	VIT_214s0108g00990	12.2983	2.09212	0.851991	2.45557	0.0140662	0.0417523
598	VIT_216s0148g00030	219.911	2.09209	0.416723	5.02033	5.16e-07	4.84e-06
599	VIT_202s0025g01670	378.874	2.0915	0.22266	9.39324	5.82e-21	3.03e-19
600	VIT_212s0034g02220	413.229	2.08851	0.301092	6.93643	4.02e-12	8.3e-11
601	VIT_211s0016g01520	392.475	2.08804	0.250154	8.34704	7e-17	2.52e-15
602	VIT_217s0000g07375	263.17	2.08747	0.311905	6.69265	2.19e-11	4.06e-10
603	VIT_205s0020g03270	2621.51	2.08743	0.210252	9.92824	3.14e-23	1.95e-21
604	VIT_205s0020g04280	86.1611	2.08143	0.614549	3.38692	0.000706827	0.00323334
605	VIT_200s0258g00090	913.219	2.07752	0.313497	6.62692	3.43e-11	6.12e-10
606	VIT_200s0674g00010	49.0518	2.07516	0.430797	4.81703	1.46e-06	1.25e-05
607	VIT_214s0060g00080	51.274	2.07431	0.492037	4.21576	2.49e-05	0.000165441
608	VIT_216s0148g00220	55.2973	2.07365	0.410012	5.05753	4.25e-07	4.04e-06
609	VIT_203s0088g01180	1410.67	2.07328	0.440023	4.71175	2.46e-06	2.01e-05
610	VIT_207s0031g01710	2545.13	2.07197	0.209209	9.9038	4.01e-23	2.47e-21
611	VIT_209s0054g01590	690	2.0694	0.197107	10.4988	8.75e-26	6.37e-24
612	VIT_218s0001g05230	38.1382	2.06617	0.510916	4.04405	5.25e-05	0.0003246
613	VIT_204s0008g03680	83.2436	2.06456	0.414936	4.9756	6.5e-07	5.97e-06
614	VIT_201s0011g03990	37.5112	2.05748	0.609767	3.3742	0.000740307	0.00336953
615	VIT_209s0002g00220	1570.83	2.05587	0.298866	6.87891	6.03e-12	1.21e-10
616	VIT_201s0026g02710	51.4718	2.05489	0.593315	3.46341	0.000533367	0.00253024
617	VIT_209s0002g06360	20.7166	2.05323	0.66275	3.09805	0.00194799	0.00784981
618	VIT_200s0454g00030	222.613	2.05177	0.250254	8.19877	2.43e-16	8.2e-15
619	VIT_201s0026g02470	1523.03	2.04959	0.242778	8.44225	3.11e-17	1.16e-15
620	VIT_214s0066g01000	93.9299	2.04795	0.417382	4.90667	9.26e-07	8.31e-06
621	VIT_206s0080g00460	43.2774	2.04422	0.395866	5.1639	2.42e-07	2.41e-06
622	VIT_206s0004g04560	28.1106	2.0441	0.613548	3.33161	0.000863466	0.00386282
623	VIT_210s0003g05450	3795.67	2.04335	0.237683	8.59693	8.19e-18	3.23e-16
624	VIT_218s0001g14440	157.469	2.04069	0.442679	4.60987	4.03e-06	3.15e-05
625	VIT_209s0002g07830	172.757	2.03985	0.352961	5.77927	7.5e-09	9.58e-08
626	VIT_201s0011g02470	375.633	2.03862	0.198175	10.287	8.07e-25	5.7e-23
627	VIT_208s0007g06020	34.3341	2.03848	0.544356	3.74477	0.000180562	0.000969912
628	VIT_219s0015g00060	60.058	2.03782	0.38124	5.34524	9.03e-08	9.71e-07
629	VIT_209s0002g04160	68.8742	2.03774	0.351125	5.80347	6.5e-09	8.39e-08
630	VIT_212s0028g01880	101.702	2.03761	0.324741	6.27458	3.51e-10	5.46e-09
631	VIT_202s0033g00800	108.542	2.03752	0.402262	5.06517	4.08e-07	3.9e-06
632	VIT_201s0010g03285	35.0189	2.03692	0.445496	4.57226	4.82e-06	3.73e-05
633	VIT_216s0050g00010	48.7385	2.03609	0.413712	4.92151	8.59e-07	7.72e-06
634	VIT_208s0007g07620	902.16	2.03532	0.305459	6.66316	2.68e-11	4.88e-10
635	VIT_202s0154g00110	61.4503	2.034	0.437662	4.64742	3.36e-06	2.67e-05
636	VIT_212s0059g02510	72.427	2.03295	0.4081	4.9815	6.31e-07	5.8e-06
637	VIT_210s0092g00710	686.164	2.03063	0.345169	5.88301	4.03e-09	5.34e-08
638	VIT_216s0022g00650	118.139	2.02798	0.305601	6.63605	3.22e-11	5.8e-10
639	VIT_213s0019g00420	37.1532	2.02727	0.588196	3.44659	0.000567708	0.00267321
640	VIT_204s0008g01140	94.2184	2.02568	0.436956	4.63588	3.55e-06	2.81e-05
641	VIT_212s0134g00270	25.9988	2.02562	0.65876	3.07491	0.00210569	0.00839286
642	VIT_200s0515g00030	74.5502	2.02298	0.33678	6.00683	1.89e-09	2.66e-08
643	VIT_216s0039g01260	36.2335	2.02249	0.727545	2.77989	0.00543777	0.0188367
644	VIT_201s0010g00710	112.896	2.01897	0.356758	5.65921	1.52e-08	1.85e-07
645	VIT_208s0007g08520	22.7379	2.0184	0.697431	2.89404	0.00380316	0.0139681
646	VIT_206s0009g03540	260.748	2.0176	0.274866	7.34031	2.13e-13	5.18e-12
647	VIT_204s0069g00540	1166.41	2.01553	0.186436	10.8108	3.06e-27	2.46e-25
648	VIT_212s0034g00280	17.14	2.01547	0.769158	2.62036	0.00878361	0.0281846
649	VIT_219s0014g04130	535.001	2.01528	0.225263	8.94636	3.67e-19	1.62e-17
650	VIT_200s0313g00010	14.7139	2.01502	0.682503	2.9524	0.00315309	0.0118872
651	VIT_209s0002g02320	588.53	2.01482	0.439574	4.58357	4.57e-06	3.55e-05
652	VIT_200s0471g00020	24.7517	2.00794	0.59955	3.34907	0.000810831	0.00365477
653	VIT_218s0001g00600	9.04857	2.00771	0.792212	2.53431	0.0112669	0.0347795
654	VIT_201s0010g01680	167.26	2.00753	0.284092	7.06648	1.59e-12	3.45e-11
655	VIT_216s0100g00900	483.952	2.00616	0.722489	2.77674	0.00549078	0.0189928
656	VIT_209s0002g03030	967.11	2.00524	0.258203	7.76614	8.09e-15	2.31e-13
657	VIT_206s0004g02790	16.3441	2.0051	0.712469	2.8143	0.00488842	0.0172055
658	VIT_210s0042g00590	192.667	2.00509	0.278086	7.21034	5.58e-13	1.29e-11
659	VIT_219s0014g04500	16.0302	2.00421	0.791709	2.5315	0.0113577	0.0350315
660	VIT_201s0011g04950	307.295	2.00377	0.190128	10.5391	5.7e-26	4.2e-24
661	VIT_201s0127g00590	141.035	1.99369	0.424822	4.69301	2.69e-06	2.18e-05
662	VIT_217s0000g03320	12.1679	1.99295	0.687272	2.8998	0.00373404	0.0137539
663	VIT_202s0012g02190	3590.19	1.99042	0.422256	4.71378	2.43e-06	1.99e-05
664	VIT_208s0007g00710	175.884	1.98695	0.471892	4.21061	2.55e-05	0.000168902
665	VIT_215s0046g03500	38.1928	1.98378	0.47806	4.14965	3.33e-05	0.000215656
666	VIT_214s0108g00890	971.602	1.98346	0.251584	7.88386	3.17e-15	9.45e-14
667	VIT_214s0066g02040	447.963	1.98269	0.197643	10.0317	1.11e-23	7.11e-22
668	VIT_201s0010g00760	28.1508	1.98005	0.686444	2.8845	0.00392039	0.0143309
669	VIT_201s0010g03175	39.8494	1.97974	0.496027	3.99118	6.57e-05	0.000394591
670	VIT_209s0002g09273	86.2206	1.97955	0.325898	6.07413	1.25e-09	1.8e-08
671	VIT_201s0011g00960	928.538	1.9786	0.213846	9.25245	2.19e-20	1.09e-18
672	VIT_200s0388g00020	256.835	1.97801	0.381229	5.18851	2.12e-07	2.14e-06
673	VIT_219s0014g05160	48.4676	1.97683	0.42485	4.653	3.27e-06	2.6e-05
674	VIT_211s0037g00660	32.4165	1.97296	0.47814	4.12633	3.69e-05	0.000235766
675	VIT_200s0485g00010	64.5743	1.96802	0.404386	4.86669	1.13e-06	9.99e-06
676	VIT_200s0225g00080	34.8848	1.96575	0.639433	3.07421	0.0021106	0.0084089
677	VIT_206s0061g00470	10.9152	1.96256	0.811915	2.4172	0.0156406	0.0456444
678	VIT_216s0022g01650	398.478	1.96146	0.35578	5.51314	3.52e-08	4.06e-07
679	VIT_212s0028g01650	191.482	1.95803	0.331335	5.90951	3.43e-09	4.61e-08
680	VIT_218s0001g00030	120.284	1.95736	0.539902	3.6254	0.000288517	0.00146009
681	VIT_213s0156g00580	512.864	1.95522	0.277164	7.05438	1.73e-12	3.73e-11
682	VIT_209s0002g07555	102.635	1.955	0.526729	3.71159	0.000205961	0.00108526
683	VIT_214s0066g01570	51.4891	1.95434	0.615089	3.17733	0.00148638	0.0062098
684	VIT_212s0142g00590	104.757	1.95071	0.406438	4.79952	1.59e-06	1.35e-05
685	VIT_206s0061g00760	77.5081	1.94192	0.45598	4.25879	2.06e-05	0.000138745
686	VIT_206s0004g01020	546.527	1.94052	0.436667	4.44393	8.83e-06	6.48e-05
687	VIT_210s0092g00240	330.08	1.93579	0.266379	7.26705	3.67e-13	8.65e-12
688	VIT_204s0008g01470	224.441	1.93573	0.3262	5.93418	2.95e-09	4.01e-08
689	VIT_206s0004g02850	196.147	1.93541	0.263569	7.34308	2.09e-13	5.08e-12
690	VIT_209s0002g07610	77.832	1.93509	0.436642	4.43175	9.35e-06	6.81e-05
691	VIT_201s0146g00330	724.624	1.93332	0.198701	9.72978	2.25e-22	1.3e-20
692	VIT_205s0051g00780	81.7011	1.93269	0.431141	4.48273	7.37e-06	5.48e-05
693	VIT_214s0030g01540	24.4805	1.93265	0.527632	3.66287	0.000249405	0.00128821
694	VIT_210s0003g01790	241.062	1.93178	0.247981	7.79004	6.7e-15	1.93e-13
695	VIT_202s0025g02850	76.3963	1.93032	0.505932	3.81538	0.000135973	0.000755055
696	VIT_218s0001g01370	198.056	1.93008	0.486351	3.96849	7.23e-05	0.000429645
697	VIT_202s0154g00260	255.646	1.92662	0.304597	6.32514	2.53e-10	4.01e-09
698	VIT_204s0008g05770	250.928	1.92567	0.228434	8.4299	3.46e-17	1.28e-15
699	VIT_208s0007g00140	1120.51	1.92552	0.180433	10.6717	1.38e-26	1.05e-24
700	VIT_200s0407g00020	845.271	1.92499	0.254238	7.57161	3.69e-14	9.76e-13
701	VIT_206s0004g01030	73.7576	1.92212	0.569313	3.37621	0.000734915	0.00334738
702	VIT_214s0068g01790	32.4884	1.92103	0.729087	2.63485	0.00841748	0.027189
703	VIT_208s0058g00470	116.215	1.92008	0.564499	3.40139	0.000670445	0.00309212
704	VIT_202s0012g02540	213.374	1.91762	0.283409	6.76628	1.32e-11	2.53e-10
705	VIT_201s0137g00080	10.5006	1.91756	0.659105	2.90934	0.00362195	0.0133954
706	VIT_200s0258g00100	269.979	1.91727	0.355635	5.39113	7e-08	7.69e-07
707	VIT_200s0388g00060	225.685	1.91706	0.248536	7.71341	1.22e-14	3.38e-13
708	VIT_219s0015g00550	2108.42	1.91704	0.177709	10.7875	3.94e-27	3.12e-25
709	VIT_212s0059g00710	780.57	1.91702	0.150024	12.7781	2.17e-37	3.21e-35
710	VIT_218s0001g14660	98.4163	1.91346	0.316169	6.05203	1.43e-09	2.04e-08
711	VIT_204s0210g00050	61.6348	1.91071	0.432029	4.42264	9.75e-06	7.08e-05
712	VIT_217s0000g10070	85.3627	1.91035	0.30477	6.26815	3.65e-10	5.68e-09
713	VIT_213s0156g00550	341.95	1.91034	0.20908	9.13686	6.43e-20	3.04e-18
714	VIT_202s0025g03000	269.557	1.91013	0.247672	7.71236	1.24e-14	3.4e-13
715	VIT_208s0040g03230	218.031	1.90996	0.278818	6.85019	7.38e-12	1.45e-10
716	VIT_203s0063g00780	48.5307	1.90961	0.469502	4.06731	4.76e-05	0.000296732
717	VIT_217s0000g09620	69.5335	1.90906	0.290341	6.57525	4.86e-11	8.47e-10
718	VIT_209s0002g07570	353.076	1.90719	0.321917	5.92449	3.13e-09	4.23e-08
719	VIT_202s0025g04570	242.829	1.90423	0.320655	5.93854	2.88e-09	3.91e-08
720	VIT_208s0007g02970	157.261	1.904	0.301093	6.32363	2.55e-10	4.03e-09
721	VIT_213s0156g00570	322.287	1.90352	0.25682	7.4119	1.25e-13	3.14e-12
722	VIT_218s0001g15660	950.672	1.9027	0.209906	9.06454	1.25e-19	5.81e-18
723	VIT_208s0007g06610	51.9241	1.90199	0.53614	3.54757	0.000388803	0.00190752
724	VIT_211s0016g04035	47.4148	1.90149	0.686765	2.76877	0.00562687	0.0193915
725	VIT_214s0066g01280	245.215	1.90111	0.277228	6.85758	7e-12	1.39e-10
726	VIT_217s0000g00730	42.2257	1.89792	0.464174	4.0888	4.34e-05	0.00027304
727	VIT_214s0068g01500	471.624	1.89719	0.376678	5.03664	4.74e-07	4.48e-06
728	VIT_201s0010g03870	38.3201	1.89377	0.595394	3.18069	0.00146924	0.0061449
729	VIT_218s0117g00550	54.5497	1.89277	0.52693	3.59208	0.000328052	0.00163683
730	VIT_204s0008g02670	261.49	1.89225	0.255846	7.39605	1.4e-13	3.5e-12
731	VIT_200s2745g00010	46.8767	1.89172	0.553445	3.41809	0.000630618	0.00293111
732	VIT_216s0148g00010	49.4279	1.89171	0.385934	4.90164	9.5e-07	8.51e-06
733	VIT_200s0340g00040	287.948	1.89035	0.354369	5.33441	9.59e-08	1.03e-06
734	VIT_205s0049g01290	166.988	1.89023	0.418881	4.51256	6.4e-06	4.82e-05
735	VIT_206s0004g03620	979.397	1.88921	0.226951	8.32432	8.48e-17	3.01e-15
736	VIT_201s0010g03143	156.555	1.88807	0.324168	5.82437	5.73e-09	7.47e-08
737	VIT_206s0004g06820	26.9439	1.88663	0.682332	2.76497	0.00569276	0.0195925
738	VIT_213s0067g03130	48.2546	1.88581	0.466495	4.0425	5.29e-05	0.000326228
739	VIT_205s0102g01062	55.0972	1.88293	0.39703	4.74254	2.11e-06	1.75e-05
740	VIT_213s0101g00460	50.8259	1.88275	0.456812	4.12149	3.76e-05	0.000240366
741	VIT_200s0258g00050	133.733	1.88237	0.393619	4.78222	1.73e-06	1.47e-05
742	VIT_205s0062g00740	51.3232	1.88232	0.408563	4.60718	4.08e-06	3.19e-05
743	VIT_217s0000g08600	14.3905	1.88185	0.634683	2.96503	0.0030265	0.0114778
744	VIT_205s0077g00920	841.339	1.88118	0.129047	14.5775	3.91e-48	1.1e-45
745	VIT_218s0001g10150	266.579	1.87928	0.384445	4.8883	1.02e-06	9.07e-06
746	VIT_209s0002g07750	476.729	1.87908	0.34937	5.37847	7.51e-08	8.21e-07
747	VIT_217s0000g06610	973.868	1.87784	0.145633	12.8943	4.85e-38	7.46e-36
748	VIT_201s0010g03680	40.8043	1.87311	0.585988	3.19649	0.00139109	0.00585656
749	VIT_216s0013g01780	34.9557	1.87201	0.473099	3.95691	7.59e-05	0.000448384
750	VIT_200s0218g00190	46.8198	1.87127	0.509716	3.6712	0.000241417	0.00125034
751	VIT_218s0041g01630	18.8604	1.87036	0.736932	2.53804	0.0111477	0.0344865
752	VIT_200s0425g00030	54.1307	1.86795	0.628206	2.97347	0.00294458	0.0112007
753	VIT_213s0019g02050	13951.7	1.86736	0.486278	3.8401	0.000122984	0.000689142
754	VIT_204s0023g03430	92.1092	1.86584	0.294408	6.3376	2.33e-10	3.72e-09
755	VIT_210s0003g03180	22.3645	1.86584	0.706629	2.64048	0.00827878	0.0268318
756	VIT_212s0059g01080	66.2012	1.86249	0.449305	4.14526	3.39e-05	0.000219535
757	VIT_212s0035g00920	58.0197	1.86204	0.36431	5.11114	3.2e-07	3.13e-06
758	VIT_208s0007g08840	671.172	1.86185	0.221052	8.42267	3.68e-17	1.36e-15
759	VIT_201s0026g00220	2656.69	1.86172	0.220301	8.45079	2.89e-17	1.09e-15
760	VIT_217s0000g05380	277.528	1.85853	0.193416	9.60899	7.33e-22	4.1e-20
761	VIT_208s0007g01400	16.9481	1.85754	0.728072	2.55131	0.0107317	0.0334578
762	VIT_216s0098g00690	749	1.85733	0.254829	7.28855	3.13e-13	7.43e-12
763	VIT_204s0023g01040	1294.57	1.85409	0.135075	13.7264	7.06e-43	1.37e-40
764	VIT_217s0000g07370	174.238	1.85393	0.278455	6.6579	2.78e-11	5.06e-10
765	VIT_206s0061g00710	39.5498	1.85382	0.54877	3.37813	0.000729794	0.00332882
766	VIT_217s0000g07250	30.8992	1.85291	0.582517	3.18087	0.00146835	0.00614255
767	VIT_217s0000g04360	135.457	1.85226	0.437432	4.2344	2.29e-05	0.000153204
768	VIT_218s0001g07690	518.041	1.85107	0.207061	8.93971	3.9e-19	1.71e-17
769	VIT_200s0424g00010	55.1034	1.85091	0.664766	2.7843	0.00536428	0.0186431
770	VIT_201s0011g00700	220.905	1.8503	0.231432	7.99502	1.3e-15	3.99e-14
771	VIT_218s0122g01260	659.604	1.84873	0.224914	8.21973	2.04e-16	7e-15
772	VIT_210s0003g02850	16.6325	1.84689	0.701415	2.63309	0.00846121	0.0273164
773	VIT_212s0034g00270	46.1104	1.84497	0.485149	3.80289	0.000143018	0.00078844
774	VIT_207s0031g02160	25.441	1.84415	0.610445	3.02099	0.00251948	0.00981056
775	VIT_219s0014g04080	70.8853	1.84393	0.372203	4.9541	7.27e-07	6.62e-06
776	VIT_206s0004g03140	466.924	1.84391	0.238674	7.72565	1.11e-14	3.09e-13
777	VIT_212s0034g01870	77.9532	1.84331	0.548718	3.35931	0.000781366	0.00353784
778	VIT_205s0029g01525	14.2628	1.84142	0.766104	2.40362	0.0162337	0.0470585
779	VIT_218s0001g04420	163.712	1.84022	0.267389	6.88217	5.89e-12	1.18e-10
780	VIT_216s0050g01690	3103.75	1.8384	0.237382	7.74446	9.6e-15	2.7e-13
781	VIT_200s0294g00040	380.615	1.83822	0.240721	7.63629	2.24e-14	6.04e-13
782	VIT_216s0039g01550	24.7394	1.83804	0.656833	2.79833	0.00513671	0.0179667
783	VIT_209s0002g07675	54.764	1.83441	0.548795	3.34262	0.000829907	0.00373018
784	VIT_213s0101g00250	26.2928	1.83437	0.736096	2.49203	0.0127016	0.0384129
785	VIT_206s0004g04080	432.722	1.83408	0.197914	9.26702	1.91e-20	9.51e-19
786	VIT_218s0072g00160	835.505	1.83261	0.300914	6.09013	1.13e-09	1.64e-08
787	VIT_201s0150g00120	30.6525	1.83023	0.712559	2.56854	0.0102129	0.0320373
788	VIT_204s0008g05350	606.567	1.82681	0.57781	3.1616	0.00156902	0.0065137
789	VIT_201s0011g04900	356.905	1.82572	0.178951	10.2023	1.94e-24	1.32e-22
790	VIT_206s0061g00180	946.24	1.82561	0.242432	7.53043	5.06e-14	1.32e-12
791	VIT_211s0206g00080	207.999	1.82492	0.422628	4.31803	1.57e-05	0.000108949
792	VIT_211s0206g00070	659.947	1.82302	0.240261	7.58767	3.26e-14	8.64e-13
793	VIT_200s0425g00035	76.8999	1.82118	0.527011	3.45567	0.00054893	0.00259568
794	VIT_219s0090g00840	232.788	1.82073	0.637643	2.8554	0.00429828	0.015468
795	VIT_200s0515g00020	82.9292	1.82022	0.364462	4.99426	5.91e-07	5.48e-06
796	VIT_211s0016g05440	266.298	1.81556	0.319121	5.68924	1.28e-08	1.58e-07
797	VIT_207s0151g00810	266.461	1.8155	0.257344	7.05475	1.73e-12	3.73e-11
798	VIT_216s0013g01760	293.745	1.81348	0.335934	5.3983	6.73e-08	7.41e-07
799	VIT_201s0127g00710	121.708	1.81122	0.268345	6.74961	1.48e-11	2.81e-10
800	VIT_209s0054g00900	85.256	1.81049	0.381416	4.74675	2.07e-06	1.72e-05
801	VIT_213s0084g00070	683.382	1.80783	0.257912	7.00948	2.39e-12	5.05e-11
802	VIT_200s0317g00110	1715.96	1.80439	0.222179	8.12134	4.61e-16	1.5e-14
803	VIT_216s0098g00070	13.5992	1.80381	0.739715	2.43852	0.0147474	0.0434498
804	VIT_213s0019g03020	157.692	1.80368	0.251748	7.16463	7.8e-13	1.77e-11
805	VIT_205s0062g00720	25.5381	1.80067	0.713223	2.52469	0.0115801	0.0356196
806	VIT_216s0022g00660	2699.99	1.80056	0.246588	7.30189	2.84e-13	6.75e-12
807	VIT_211s0052g00450	1694.28	1.79591	0.200306	8.96583	3.08e-19	1.38e-17
808	VIT_216s0148g00320	231.093	1.79542	0.349202	5.14148	2.73e-07	2.7e-06
809	VIT_203s0017g00670	406.539	1.79329	0.195564	9.16982	4.74e-20	2.28e-18
810	VIT_219s0014g04190	434.382	1.79038	0.279516	6.40528	1.5e-10	2.46e-09
811	VIT_201s0011g02860	13530.6	1.78575	0.156297	11.4254	3.12e-30	3.01e-28
812	VIT_207s0005g00380	47.143	1.78519	0.553535	3.22507	0.00125942	0.00537696
813	VIT_200s0250g00020	855.981	1.78357	0.184929	9.64463	5.18e-22	2.93e-20
814	VIT_213s0067g03780	856	1.78054	0.213072	8.35649	6.46e-17	2.33e-15
815	VIT_215s0048g02410	30310.8	1.78	0.112891	15.7674	5.21e-56	2.31e-53
816	VIT_214s0108g01070	143.106	1.77795	0.418803	4.24531	2.18e-05	0.000146411
817	VIT_206s0004g06170	301.388	1.77775	0.320282	5.55058	2.85e-08	3.32e-07
818	VIT_205s0020g03300	23.4039	1.77742	0.708694	2.50802	0.0121411	0.0370359
819	VIT_206s0004g03100	2883.19	1.77675	0.194418	9.13882	6.31e-20	3e-18
820	VIT_218s0122g00220	72.8174	1.76311	0.313092	5.6313	1.79e-08	2.15e-07
821	VIT_216s0039g01100	950.986	1.76253	0.482908	3.64984	0.000262408	0.00134707
822	VIT_216s0098g00400	455.695	1.76147	0.25988	6.77803	1.22e-11	2.34e-10
823	VIT_219s0015g01900	133.954	1.76083	0.297749	5.91381	3.34e-09	4.5e-08
824	VIT_209s0002g07710	109.333	1.75985	0.399939	4.40029	1.08e-05	7.77e-05
825	VIT_200s0125g00090	1654.73	1.75835	0.263785	6.66586	2.63e-11	4.81e-10
826	VIT_205s0102g01068	19.6222	1.75814	0.618575	2.84224	0.00447977	0.0159824
827	VIT_207s0129g00240	991.51	1.75496	0.196065	8.95091	3.53e-19	1.56e-17
828	VIT_200s0294g00080	34.3093	1.75266	0.639144	2.7422	0.00610292	0.0207741
829	VIT_216s0148g00120	724.206	1.75153	0.186259	9.40372	5.27e-21	2.77e-19
830	VIT_212s0028g02530	306.658	1.74896	0.334459	5.22922	1.7e-07	1.75e-06
831	VIT_218s0001g03610	28.9659	1.7477	0.662706	2.63721	0.00835905	0.0270355
832	VIT_207s0031g00080	768.609	1.74735	0.250111	6.9863	2.82e-12	5.93e-11
833	VIT_206s0004g01040	48.6817	1.74497	0.694066	2.51413	0.0119326	0.0365273
834	VIT_219s0027g00390	234.451	1.74475	0.264352	6.60009	4.11e-11	7.23e-10
835	VIT_204s0069g00970	68.0185	1.7432	0.560749	3.1087	0.00187915	0.00762131
836	VIT_202s0025g04890	66.6612	1.74201	0.409445	4.25456	2.09e-05	0.000141121
837	VIT_216s0098g00390	110.416	1.74166	0.329529	5.28532	1.25e-07	1.32e-06
838	VIT_202s0025g04490	202.904	1.74002	0.276737	6.28764	3.22e-10	5.03e-09
839	VIT_213s0074g00570	52.9867	1.73723	0.458062	3.79257	0.000149096	0.00081887
840	VIT_216s0098g00120	759.431	1.73621	0.300921	5.76966	7.94e-09	1.01e-07
841	VIT_212s0059g02280	810.845	1.73603	0.162324	10.6948	1.08e-26	8.25e-25
842	VIT_212s0059g01600	88.3921	1.73355	0.322846	5.36958	7.89e-08	8.57e-07
843	VIT_212s0142g00700	17.4443	1.73347	0.661051	2.62229	0.00873415	0.0280552
844	VIT_205s0049g01070	51.6757	1.73262	0.547253	3.16603	0.00154537	0.00642948
845	VIT_201s0011g05420	35.3039	1.72784	0.657328	2.62858	0.00857411	0.0276341
846	VIT_205s0077g00030	6625.13	1.72582	0.176116	9.79933	1.13e-22	6.72e-21
847	VIT_211s0052g00620	201.739	1.72578	0.692849	2.49085	0.0127437	0.0385097
848	VIT_206s0004g07920	1628.12	1.72435	0.170365	10.1215	4.44e-24	2.92e-22
849	VIT_204s0044g00720	496.243	1.72286	0.260308	6.61855	3.63e-11	6.44e-10
850	VIT_201s0011g00950	228.236	1.72215	0.230923	7.45767	8.81e-14	2.26e-12
851	VIT_208s0007g01070	757.206	1.72036	0.291884	5.89401	3.77e-09	5.03e-08
852	VIT_214s0108g00290	50.4421	1.7202	0.549533	3.1303	0.00174629	0.00714696
853	VIT_201s0011g02480	2493.52	1.71744	0.284213	6.0428	1.51e-09	2.15e-08
854	VIT_204s0023g00050	20.1676	1.71735	0.600887	2.85802	0.00426292	0.0153697
855	VIT_201s0011g04840	64.0662	1.71707	0.31268	5.49147	3.99e-08	4.55e-07
856	VIT_210s0003g02880	1117.37	1.71611	0.184928	9.27989	1.7e-20	8.52e-19
857	VIT_201s0011g03960	81.7353	1.71381	0.314567	5.44814	5.09e-08	5.69e-07
858	VIT_219s0027g01170	59.8158	1.71365	0.52606	3.25752	0.0011239	0.0048792
859	VIT_206s0080g00980	1201.52	1.71294	0.118711	14.4295	3.37e-47	8.36e-45
860	VIT_217s0000g07030	27.4716	1.71207	0.692182	2.47344	0.013382	0.0401335
861	VIT_219s0014g03130	124.418	1.71194	0.695697	2.46075	0.0138646	0.0413081
862	VIT_201s0026g01050	2765.91	1.7118	0.203941	8.3936	4.71e-17	1.72e-15
863	VIT_219s0015g00340	36.5365	1.71153	0.582926	2.93609	0.00332377	0.0124495
864	VIT_213s0156g00610	68.8098	1.70996	0.37117	4.60694	4.09e-06	3.19e-05
865	VIT_205s0020g05060	120.672	1.7082	0.408676	4.17984	2.92e-05	0.000190877
866	VIT_203s0038g00960	132.184	1.70755	0.251089	6.80058	1.04e-11	2.01e-10
867	VIT_206s0061g01070	84.3742	1.70741	0.343855	4.96549	6.85e-07	6.27e-06
868	VIT_213s0084g00560	128.329	1.70614	0.315392	5.40959	6.32e-08	6.99e-07
869	VIT_213s0156g00590	553.466	1.70573	0.35048	4.86685	1.13e-06	9.99e-06
870	VIT_217s0000g05820	55.9856	1.70542	0.412733	4.13202	3.6e-05	0.00023077
871	VIT_200s1553g00010	72.3647	1.70465	0.355022	4.80155	1.57e-06	1.34e-05
872	VIT_212s0035g00610	79.6166	1.70307	0.631203	2.69814	0.0069728	0.0232143
873	VIT_209s0002g04610	107.755	1.70098	0.288891	5.88796	3.91e-09	5.19e-08
874	VIT_218s0072g01220	49.1299	1.69962	0.449874	3.778	0.000158093	0.000860847
875	VIT_204s0043g00850	50.419	1.69891	0.415411	4.0897	4.32e-05	0.000272256
876	VIT_201s0011g02330	704.498	1.69874	0.205226	8.27743	1.26e-16	4.42e-15
877	VIT_206s0004g05670	15.9332	1.69854	0.712796	2.38292	0.0171759	0.0493785
878	VIT_216s0098g01650	3542.62	1.68954	0.146015	11.571	5.78e-31	5.96e-29
879	VIT_213s0019g01670	784.397	1.68917	0.156665	10.7821	4.18e-27	3.28e-25
880	VIT_201s0011g00460	686.116	1.68896	0.206215	8.19027	2.61e-16	8.71e-15
881	VIT_205s0020g02360	270.772	1.68844	0.212657	7.93972	2.03e-15	6.13e-14
882	VIT_201s0011g06310	144.167	1.68821	0.469108	3.59877	0.000319728	0.00159864
883	VIT_218s0001g13300	207.682	1.68615	0.319977	5.26961	1.37e-07	1.43e-06
884	VIT_208s0040g03220	545.285	1.68291	0.184233	9.13467	6.56e-20	3.09e-18
885	VIT_216s0050g02350	1612.28	1.68105	0.193894	8.66993	4.32e-18	1.75e-16
886	VIT_205s0020g05050	323.716	1.67944	0.248575	6.75627	1.42e-11	2.7e-10
887	VIT_218s0001g12520	4786	1.67851	0.350574	4.78788	1.69e-06	1.43e-05
888	VIT_214s0006g02990	222.608	1.67746	0.409829	4.09309	4.26e-05	0.000268803
889	VIT_219s0090g01870	400.152	1.67685	0.233012	7.19643	6.18e-13	1.42e-11
890	VIT_207s0031g03150	104.463	1.67673	0.2809	5.96912	2.39e-09	3.28e-08
891	VIT_217s0000g07780	953.936	1.67513	0.152351	10.9952	4.03e-28	3.42e-26
892	VIT_202s0025g04850	59.8419	1.675	0.318575	5.25779	1.46e-07	1.52e-06
893	VIT_214s0068g00100	92.7253	1.67482	0.346571	4.83254	1.35e-06	1.17e-05
894	VIT_214s0068g00070	155.399	1.67419	0.336977	4.96826	6.76e-07	6.19e-06
895	VIT_217s0000g05630	1147.9	1.67084	0.166361	10.0435	9.82e-24	6.33e-22
896	VIT_217s0000g02370	131.051	1.67043	0.344944	4.84261	1.28e-06	1.12e-05
897	VIT_209s0002g03340	58.0798	1.66875	0.537501	3.10464	0.00190511	0.00770932
898	VIT_202s0033g00270	69.9133	1.66831	0.305587	5.45936	4.78e-08	5.36e-07
899	VIT_212s0028g01430	38.5709	1.66775	0.574166	2.90466	0.00367657	0.0135737
900	VIT_219s0014g04150	1065.67	1.66735	0.201272	8.28406	1.19e-16	4.19e-15
901	VIT_208s0058g01290	718.542	1.66629	0.195159	8.53812	1.36e-17	5.3e-16
902	VIT_203s0038g03410	3746.92	1.66304	0.235545	7.06036	1.66e-12	3.59e-11
903	VIT_216s0098g00660	769.105	1.66224	0.156057	10.6515	1.72e-26	1.29e-24
904	VIT_216s0050g01780	1338.42	1.66193	0.173422	9.58317	9.41e-22	5.2e-20
905	VIT_211s0037g01120	12.8198	1.66178	0.684714	2.42698	0.0152252	0.0446129
906	VIT_201s0127g00160	593.266	1.66157	0.21393	7.76692	8.04e-15	2.3e-13
907	VIT_204s0210g00030	38.6483	1.65851	0.457895	3.62202	0.000292308	0.00147663
908	VIT_218s0001g00110	92.1698	1.65841	0.310376	5.34322	9.13e-08	9.81e-07
909	VIT_212s0059g02520	145.825	1.6563	0.250337	6.61631	3.68e-11	6.52e-10
910	VIT_214s0060g01460	253.183	1.65529	0.165289	10.0145	1.32e-23	8.42e-22
911	VIT_205s0049g00780	70.6209	1.65441	0.562352	2.94195	0.00326156	0.0122477
912	VIT_207s0191g00050	440.304	1.651	0.211368	7.81099	5.67e-15	1.65e-13
913	VIT_211s0118g00780	604.45	1.64925	0.255322	6.45948	1.05e-10	1.76e-09
914	VIT_204s0044g00050	49.1553	1.64652	0.453038	3.6344	0.000278624	0.00141651
915	VIT_200s2380g00010	49.885	1.6458	0.442543	3.71896	0.000200049	0.00105937
916	VIT_214s0219g00230	20.8743	1.64541	0.654783	2.5129	0.0119742	0.0366252
917	VIT_219s0090g01580	81.1485	1.64292	0.383722	4.28153	1.86e-05	0.000126254
918	VIT_201s0011g01000	437.879	1.64269	0.18232	9.00989	2.06e-19	9.33e-18
919	VIT_208s0007g08260	1655.04	1.64265	0.160837	10.2131	1.73e-24	1.19e-22
920	VIT_204s0069g00790	39.4788	1.64199	0.435205	3.77291	0.000161356	0.000877617
921	VIT_216s0050g02700	159.286	1.64108	0.373669	4.3918	1.12e-05	8.04e-05
922	VIT_200s2620g00010	27.615	1.64038	0.566073	2.89782	0.00375763	0.0138248
923	VIT_216s0050g01390	1012.41	1.63811	0.262384	6.2432	4.29e-10	6.61e-09
924	VIT_207s0031g01380	544.899	1.6381	0.339974	4.81831	1.45e-06	1.25e-05
925	VIT_206s0061g01140	142.985	1.63542	0.379225	4.31252	1.61e-05	0.000111176
926	VIT_207s0031g02400	156.637	1.63487	0.405951	4.02726	5.64e-05	0.000345315
927	VIT_200s0434g00090	103.446	1.63442	0.365884	4.46705	7.93e-06	5.87e-05
928	VIT_200s0187g00210	188.442	1.63317	0.234775	6.95632	3.49e-12	7.27e-11
929	VIT_204s0008g00290	51.8374	1.6331	0.439016	3.71992	0.000199286	0.00105651
930	VIT_209s0002g05560	772.55	1.63233	0.408503	3.99589	6.45e-05	0.000387927
931	VIT_205s0051g00640	49.1608	1.62952	0.437761	3.72239	0.000197343	0.00104796
932	VIT_205s0102g01100	132.751	1.6272	0.37066	4.39	1.13e-05	8.1e-05
933	VIT_212s0028g02660	1067.05	1.62283	0.183347	8.85114	8.66e-19	3.7e-17
934	VIT_206s0004g04620	510.933	1.62123	0.160531	10.0991	5.57e-24	3.65e-22
935	VIT_207s0104g00610	332.34	1.61908	0.281073	5.76035	8.39e-09	1.06e-07
936	VIT_211s0016g01160	164.797	1.61874	0.280198	5.77714	7.6e-09	9.67e-08
937	VIT_215s0021g01880	569.955	1.61578	0.496571	3.25387	0.00113843	0.0049277
938	VIT_200s0258g00040	99.3352	1.61494	0.499975	3.23003	0.00123775	0.00529751
939	VIT_205s0029g00040	192.777	1.61467	0.23295	6.93138	4.17e-12	8.56e-11
940	VIT_207s0104g00950	132.77	1.61341	0.318859	5.05995	4.19e-07	3.99e-06
941	VIT_219s0015g02910	896.339	1.61246	0.2565	6.28638	3.25e-10	5.07e-09
942	VIT_211s0016g04910	26.1883	1.61121	0.586832	2.7456	0.00603994	0.02059
943	VIT_202s0025g04200	371.605	1.61008	0.152683	10.5453	5.34e-26	3.95e-24
944	VIT_218s0001g12000	1158.28	1.60923	0.194185	8.2871	1.16e-16	4.09e-15
945	VIT_214s0066g02250	1416.56	1.60859	0.131827	12.2023	3.02e-34	3.74e-32
946	VIT_219s0090g01690	36.3867	1.60692	0.525377	3.0586	0.00222373	0.00879534
947	VIT_219s0014g04040	417.401	1.6059	0.225933	7.10785	1.18e-12	2.61e-11
948	VIT_204s0023g01720	396.437	1.60567	0.182494	8.79852	1.39e-18	5.81e-17
949	VIT_216s0039g01200	122.586	1.60217	0.29177	5.49122	3.99e-08	4.56e-07
950	VIT_203s0017g00650	2983.97	1.60195	0.237028	6.75845	1.39e-11	2.67e-10
951	VIT_207s0095g00640	151.904	1.60176	0.23335	6.86419	6.69e-12	1.33e-10
952	VIT_206s0061g01480	1112.46	1.60066	0.297368	5.38277	7.33e-08	8.02e-07
953	VIT_217s0000g09710	5944.94	1.60001	0.162166	9.86648	5.82e-23	3.52e-21
954	VIT_200s0218g00170	138.582	1.6	0.324359	4.9328	8.11e-07	7.33e-06
955	VIT_200s0388g00085	116.526	1.5985	0.384267	4.15987	3.18e-05	0.00020708
956	VIT_216s0148g00050	39.4524	1.59691	0.535724	2.98085	0.00287448	0.0109831
957	VIT_204s0008g00440	1187.01	1.59548	0.19303	8.26542	1.39e-16	4.86e-15
958	VIT_200s0291g00060	4164.62	1.59544	0.133596	11.9423	7.13e-33	8.05e-31
959	VIT_216s0098g00010	183.316	1.59483	0.391338	4.07531	4.6e-05	0.000287654
960	VIT_204s0008g01070	8880.18	1.59359	0.194222	8.20502	2.31e-16	7.84e-15
961	VIT_200s1364g00010	371.879	1.59233	0.217945	7.3061	2.75e-13	6.57e-12
962	VIT_209s0002g01750	278.379	1.59181	0.214772	7.41164	1.25e-13	3.14e-12
963	VIT_212s0028g01535	26.9949	1.59113	0.544813	2.92051	0.00349462	0.0130001
964	VIT_211s0052g01250	259.756	1.59084	0.395087	4.02655	5.66e-05	0.000346134
965	VIT_206s0004g05800	56.7952	1.58837	0.366952	4.32854	1.5e-05	0.000104485
966	VIT_203s0063g01780	2292.41	1.58787	0.217455	7.30207	2.83e-13	6.75e-12
967	VIT_203s0132g00450	128.748	1.58745	0.324196	4.89658	9.75e-07	8.71e-06
968	VIT_200s0659g00010	17.3794	1.58693	0.572215	2.77332	0.00554881	0.0191659
969	VIT_200s2539g00010	44.9381	1.58539	0.583279	2.71806	0.00656653	0.0220696
970	VIT_201s0026g00840	1043.18	1.58529	0.168758	9.39388	5.78e-21	3.02e-19
971	VIT_212s0028g00610	375.957	1.58418	0.272111	5.82181	5.82e-09	7.57e-08
972	VIT_213s0084g00800	22.3305	1.58252	0.541786	2.92093	0.00348993	0.0129902
973	VIT_200s0160g00090	27.4477	1.58152	0.554096	2.85424	0.00431399	0.015507
974	VIT_210s0597g00020	204.505	1.58129	0.229539	6.88899	5.62e-12	1.13e-10
975	VIT_209s0070g00405	34.1255	1.58091	0.612381	2.58158	0.00983501	0.0310682
976	VIT_211s0118g00470	1568.83	1.57809	0.147685	10.6855	1.19e-26	9.04e-25
977	VIT_208s0056g00290	3917.16	1.5779	0.194794	8.10032	5.48e-16	1.77e-14
978	VIT_201s0010g00400	48.6567	1.57722	0.440558	3.58006	0.000343521	0.00170421
979	VIT_218s0075g00480	1026.48	1.5745	0.202816	7.76321	8.28e-15	2.34e-13
980	VIT_219s0014g04510	24.635	1.57379	0.538177	2.92429	0.00345238	0.0128655
981	VIT_208s0007g02800	213.073	1.57371	0.225838	6.96832	3.21e-12	6.68e-11
982	VIT_211s0052g00870	48.5919	1.57367	0.475579	3.30896	0.000936447	0.00414942
983	VIT_218s0001g12660	102.868	1.57191	0.396691	3.96256	7.42e-05	0.000438567
984	VIT_207s0031g01370	354.362	1.56753	0.227012	6.90504	5.02e-12	1.02e-10
985	VIT_208s0032g01220	2547.99	1.56708	0.405408	3.86543	0.000110892	0.000627469
986	VIT_200s0357g00080	125.381	1.56624	0.537494	2.91398	0.00356858	0.013216
987	VIT_208s0007g07400	854.128	1.56487	0.218239	7.17042	7.48e-13	1.7e-11
988	VIT_204s0008g02460	14939.6	1.5648	0.171143	9.14324	6.06e-20	2.9e-18
989	VIT_206s0004g04150	93.8485	1.56463	0.474719	3.2959	0.000981079	0.00432609
990	VIT_219s0085g00860	26.2063	1.56382	0.569412	2.74639	0.00602559	0.0205447
991	VIT_218s0001g10120	139.706	1.5631	0.30512	5.12292	3.01e-07	2.96e-06
992	VIT_217s0000g05320	179	1.56258	0.266829	5.85613	4.74e-09	6.23e-08
993	VIT_200s0895g00010	65.407	1.5615	0.508367	3.07159	0.00212923	0.0084725
994	VIT_201s0011g00720	251.779	1.5608	0.225623	6.91774	4.59e-12	9.39e-11
995	VIT_205s0077g01800	75.883	1.56017	0.289347	5.39206	6.97e-08	7.66e-07
996	VIT_216s0148g00410	50.2016	1.56015	0.55632	2.80441	0.00504084	0.0176678
997	VIT_200s0204g00020	154.03	1.5586	0.254926	6.11395	9.72e-10	1.43e-08
998	VIT_212s0055g00460	858.044	1.55839	0.199354	7.81721	5.4e-15	1.58e-13
999	VIT_201s0011g05600	196.419	1.55811	0.310467	5.0186	5.21e-07	4.88e-06
1000	VIT_213s0074g00420	31.3721	1.55419	0.573308	2.71092	0.00670964	0.0224399
1001	VIT_217s0000g03330	1064.64	1.55363	0.188036	8.26243	1.43e-16	4.98e-15
1002	VIT_200s0270g00130	66.9857	1.55259	0.350287	4.43233	9.32e-06	6.8e-05
1003	VIT_218s0001g12620	762.08	1.55251	0.223601	6.94319	3.83e-12	7.92e-11
1004	VIT_218s0001g14030	64.561	1.55173	0.410186	3.78299	0.000154958	0.000846676
1005	VIT_203s0017g02170	5692.89	1.55126	0.211497	7.33463	2.22e-13	5.38e-12
1006	VIT_209s0096g00200	57.4876	1.54971	0.380718	4.0705	4.69e-05	0.000293186
1007	VIT_210s0003g00630	28.3081	1.5496	0.515723	3.0047	0.0026584	0.0102552
1008	VIT_204s0044g01760	38.361	1.54639	0.458684	3.37136	0.00074798	0.00340039
1009	VIT_205s0020g04000	543.88	1.54448	0.240985	6.40904	1.46e-10	2.41e-09
1010	VIT_207s0031g03090	2860.77	1.54393	0.166604	9.26705	1.91e-20	9.51e-19
1011	VIT_204s0008g04810	56.2009	1.54371	0.504271	3.06127	0.00220401	0.00873363
1012	VIT_202s0087g00840	75.8899	1.54302	0.393799	3.91828	8.92e-05	0.000518144
1013	VIT_207s0005g01290	58.0712	1.5419	0.510203	3.02213	0.00251004	0.00978177
1014	VIT_200s2349g00010	2664.51	1.5418	0.233458	6.6042	4e-11	7.04e-10
1015	VIT_200s0256g00050	32.2771	1.53939	0.501643	3.0687	0.00214993	0.00854774
1016	VIT_218s0001g08230	1612.56	1.53872	0.369247	4.16719	3.08e-05	0.000201158
1017	VIT_201s0026g01040	146.82	1.53833	0.21806	7.05461	1.73e-12	3.73e-11
1018	VIT_216s0050g02660	144.457	1.5383	0.339529	4.53069	5.88e-06	4.47e-05
1019	VIT_200s1830g00010	32.3239	1.53778	0.407439	3.77425	0.000160488	0.000873142
1020	VIT_212s0035g00140	67.0794	1.53771	0.468929	3.2792	0.001041	0.004565
1021	VIT_200s0220g00120	3808.85	1.53331	0.11855	12.9338	2.9e-38	4.5e-36
1022	VIT_213s0074g00390	77.1583	1.53299	0.527108	2.9083	0.00363396	0.0134346
1023	VIT_217s0000g06710	598.817	1.53113	0.231235	6.62155	3.55e-11	6.32e-10
1024	VIT_202s0025g01470	168.671	1.53067	0.336253	4.55213	5.31e-06	4.07e-05
1025	VIT_201s0026g00360	36.0319	1.52996	0.620336	2.46634	0.0136501	0.0407882
1026	VIT_205s0049g00840	163.606	1.52976	0.620797	2.46419	0.0137322	0.0410097
1027	VIT_205s0020g04560	1113.4	1.52947	0.211134	7.24409	4.35e-13	1.02e-11
1028	VIT_211s0016g03080	895.597	1.52943	0.271093	5.64174	1.68e-08	2.03e-07
1029	VIT_201s0011g00380	709.19	1.52797	0.226642	6.74179	1.56e-11	2.96e-10
1030	VIT_214s0068g00690	159.911	1.52653	0.249435	6.11994	9.36e-10	1.38e-08
1031	VIT_218s0001g06340	202.028	1.5259	0.223937	6.81398	9.49e-12	1.85e-10
1032	VIT_209s0002g03270	65.6242	1.52576	0.348703	4.37554	1.21e-05	8.6e-05
1033	VIT_217s0000g02920	33.4957	1.52369	0.456894	3.33489	0.000853326	0.00382194
1034	VIT_202s0025g03300	3922.71	1.5236	0.208639	7.30257	2.82e-13	6.73e-12
1035	VIT_207s0130g00460	42.4481	1.52196	0.473822	3.2121	0.00131769	0.00559073
1036	VIT_213s0019g03180	49.7708	1.52159	0.532057	2.85982	0.00423884	0.0153003
1037	VIT_219s0014g04460	66.9929	1.51939	0.434045	3.50055	0.000464302	0.00223484
1038	VIT_218s0089g00600	343.665	1.51604	0.262305	5.77969	7.48e-09	9.56e-08
1039	VIT_218s0001g10520	58.7608	1.51585	0.383757	3.95003	7.81e-05	0.000459172
1040	VIT_214s0068g00150	60.5975	1.51477	0.415006	3.65	0.000262242	0.00134707
1041	VIT_200s1679g00010	48.0041	1.51312	0.568698	2.66067	0.00779864	0.0254966
1042	VIT_203s0132g00150	393.474	1.51086	0.227763	6.63347	3.28e-11	5.88e-10
1043	VIT_216s0148g00260	252.559	1.51012	0.323218	4.67213	2.98e-06	2.39e-05
1044	VIT_211s0016g00050	34.2434	1.50728	0.437369	3.44625	0.000568419	0.00267524
1045	VIT_213s0019g04610	1291.39	1.50687	0.1479	10.1885	2.23e-24	1.52e-22
1046	VIT_212s0059g00250	259.899	1.50642	0.24719	6.09419	1.1e-09	1.61e-08
1047	VIT_205s0049g00330	22.6284	1.50613	0.533796	2.82155	0.00477928	0.0168837
1048	VIT_217s0000g05020	60.5429	1.50575	0.365669	4.11778	3.83e-05	0.000243944
1049	VIT_216s0050g01420	2544.04	1.5056	0.216729	6.94689	3.73e-12	7.74e-11
1050	VIT_211s0037g00850	5138.59	1.50536	0.198188	7.59564	3.06e-14	8.15e-13
1051	VIT_210s0071g00440	53.389	1.5046	0.35234	4.2703	1.95e-05	0.000132265
1052	VIT_218s0041g00520	47.4562	1.50393	0.488046	3.08153	0.00205937	0.00823403
1053	VIT_200s0629g00020	79.9208	1.50349	0.563927	2.6661	0.00767374	0.0251572
1054	VIT_210s0092g00250	162.847	1.50271	0.273802	5.4883	4.06e-08	4.62e-07
1055	VIT_206s0061g00440	1136.92	1.50243	0.302891	4.96031	7.04e-07	6.42e-06
1056	VIT_212s0034g00660	146.792	1.50213	0.264716	5.67451	1.39e-08	1.7e-07
1057	VIT_211s0016g03650	718.776	1.50204	0.176988	8.48668	2.13e-17	8.11e-16
1058	VIT_202s0025g01610	392.304	1.50017	0.222144	6.75315	1.45e-11	2.75e-10
1	VIT_216s0022g02140	69.8248	-1.50011	0.364003	-4.12114	3.77e-05	0.000240656
2	VIT_209s0002g06060	93.1278	-1.5022	0.346249	-4.33849	1.43e-05	0.000100266
3	VIT_202s0012g02240	337.316	-1.50234	0.188203	-7.98255	1.43e-15	4.4e-14
4	VIT_218s0001g10080	335.115	-1.50253	0.294155	-5.10797	3.26e-07	3.18e-06
5	VIT_216s0013g01520	200.762	-1.50397	0.355728	-4.22787	2.36e-05	0.000157498
6	VIT_217s0000g09840	1750.13	-1.5054	0.13616	-11.0561	2.05e-28	1.75e-26
7	VIT_213s0064g01800	84.3351	-1.50651	0.356634	-4.22425	2.4e-05	0.00015974
8	VIT_207s0104g00130	68.2588	-1.50824	0.410451	-3.6746	0.000238221	0.0012358
9	VIT_219s0090g00270	610.276	-1.51017	0.207397	-7.28153	3.3e-13	7.81e-12
10	VIT_218s0041g00600	52.3639	-1.51054	0.465969	-3.24173	0.00118808	0.00511359
11	VIT_200s0323g00030	738.423	-1.51091	0.177267	-8.52337	1.55e-17	6e-16
12	VIT_212s0035g01180	705.395	-1.51309	0.213011	-7.10335	1.22e-12	2.7e-11
13	VIT_209s0002g07130	38.0196	-1.51311	0.482061	-3.13883	0.00169624	0.00697807
14	VIT_208s0105g00190	2262.6	-1.51368	0.234274	-6.46116	1.04e-10	1.74e-09
15	VIT_212s0059g01560	454.897	-1.51433	0.262337	-5.77246	7.81e-09	9.92e-08
16	VIT_218s0001g10130	185.978	-1.51484	0.245055	-6.18165	6.34e-10	9.6e-09
17	VIT_200s0394g00020	114.283	-1.51793	0.28016	-5.4181	6.02e-08	6.69e-07
18	VIT_216s0098g00890	128.166	-1.52383	0.315033	-4.83706	1.32e-06	1.14e-05
19	VIT_207s0104g00700	127.604	-1.52405	0.274998	-5.54202	2.99e-08	3.47e-07
20	VIT_200s0291g00070	129.669	-1.52552	0.38303	-3.98276	6.81e-05	0.000407571
21	VIT_207s0005g01040	110.484	-1.52744	0.313729	-4.86866	1.12e-06	9.91e-06
22	VIT_209s0002g06530	37.3125	-1.52781	0.624914	-2.44483	0.014492	0.0428495
23	VIT_217s0000g07260	28.9563	-1.5329	0.597928	-2.56368	0.0103568	0.0324266
24	VIT_219s0090g00820	1827	-1.53339	0.556341	-2.7562	0.00584777	0.020037
25	VIT_207s0104g01060	232.822	-1.53373	0.215336	-7.12253	1.06e-12	2.37e-11
26	VIT_219s0015g00780	86.2535	-1.53457	0.273561	-5.60959	2.03e-08	2.42e-07
27	VIT_207s0141g00360	1171.57	-1.53682	0.292293	-5.2578	1.46e-07	1.52e-06
28	VIT_211s0103g00210	32.0084	-1.5369	0.605339	-2.5389	0.0111201	0.0344212
29	VIT_214s0066g00840	45.4181	-1.53786	0.504128	-3.05054	0.00228431	0.00900075
30	VIT_208s0007g07480	113.869	-1.53803	0.295427	-5.20613	1.93e-07	1.96e-06
31	VIT_208s0007g07410	89.6526	-1.53851	0.275403	-5.58641	2.32e-08	2.75e-07
32	VIT_218s0001g12870	81.2118	-1.53975	0.503331	-3.05911	0.00221994	0.008784
33	VIT_218s0089g00370	38.6509	-1.5403	0.553592	-2.78237	0.00539639	0.0187342
34	VIT_201s0011g01350	234.287	-1.54091	0.308388	-4.99668	5.83e-07	5.41e-06
35	VIT_205s0077g01310	57.0213	-1.54146	0.435674	-3.53811	0.000403	0.00196958
36	VIT_207s0005g02440	84.4634	-1.54149	0.565886	-2.72404	0.0064489	0.0217202
37	VIT_212s0057g00970	53.4155	-1.54311	0.449903	-3.42987	0.000603862	0.00281773
38	VIT_214s0066g02190	5678.65	-1.5435	0.180617	-8.54573	1.28e-17	4.97e-16
39	VIT_208s0007g04350	71.7068	-1.54476	0.478632	-3.22745	0.001249	0.00533726
40	VIT_208s0007g05970	167.138	-1.54478	0.301711	-5.12007	3.05e-07	3e-06
41	VIT_211s0206g00120	1229.51	-1.545	0.202365	-7.63471	2.26e-14	6.11e-13
42	VIT_213s0047g00480	19.4582	-1.54513	0.584106	-2.6453	0.00816197	0.026548
43	VIT_205s0020g01530	91.5164	-1.54516	0.318214	-4.85573	1.2e-06	1.05e-05
44	VIT_204s0008g06150	267.778	-1.54563	0.36207	-4.26888	1.96e-05	0.000133061
45	VIT_208s0040g03040	1707.76	-1.54653	0.244642	-6.32161	2.59e-10	4.07e-09
46	VIT_213s0064g00190	267.665	-1.54765	0.224886	-6.88195	5.9e-12	1.18e-10
47	VIT_218s0001g06940	134.907	-1.55102	0.368885	-4.20461	2.62e-05	0.000173084
48	VIT_207s0005g06420	6006.53	-1.55146	0.215391	-7.20298	5.89e-13	1.35e-11
49	VIT_202s0025g00950	23.282	-1.55428	0.60296	-2.57775	0.00994466	0.0313213
50	VIT_208s0007g01330	264.858	-1.55607	0.21114	-7.36987	1.71e-13	4.22e-12
51	VIT_201s0244g00170	589.569	-1.55612	0.256057	-6.07722	1.22e-09	1.77e-08
52	VIT_218s0157g00020	4714.54	-1.55676	0.170944	-9.10684	8.48e-20	3.97e-18
53	VIT_203s0038g02280	1866.43	-1.55761	0.181162	-8.59787	8.12e-18	3.21e-16
54	VIT_212s0059g02270	646.194	-1.55872	0.21237	-7.33963	2.14e-13	5.2e-12
55	VIT_214s0060g01230	388.539	-1.5592	0.221412	-7.04207	1.89e-12	4.06e-11
56	VIT_218s0001g06060	555.315	-1.56138	0.171403	-9.10937	8.29e-20	3.88e-18
57	VIT_205s0020g02540	2835.63	-1.56243	0.127488	-12.2555	1.57e-34	1.97e-32
58	VIT_215s0021g02460	32.5958	-1.56266	0.372327	-4.197	2.7e-05	0.000178261
59	VIT_218s0089g00300	14.5585	-1.56488	0.585448	-2.67296	0.00751852	0.024712
60	VIT_216s0050g00880	598.253	-1.56644	0.165662	-9.4556	3.21e-21	1.72e-19
61	VIT_201s0150g00250	324.295	-1.56685	0.274974	-5.6982	1.21e-08	1.5e-07
62	VIT_207s0129g00480	32.2887	-1.56846	0.499232	-3.14174	0.00167945	0.00692393
63	VIT_212s0028g01150	91.1701	-1.56918	0.536506	-2.92482	0.00344654	0.0128462
64	VIT_200s1937g00010	422.175	-1.57051	0.242852	-6.46694	1e-10	1.68e-09
65	VIT_215s0024g01440	135.645	-1.57085	0.286861	-5.476	4.35e-08	4.93e-07
66	VIT_205s0102g00590	548.095	-1.57198	0.272468	-5.76943	7.95e-09	1.01e-07
67	VIT_208s0040g01770	94.0807	-1.57202	0.396463	-3.9651	7.34e-05	0.000434729
68	VIT_203s0017g02290	72.1298	-1.57277	0.396426	-3.96737	7.27e-05	0.000431268
69	VIT_213s0019g03190	185.029	-1.57945	0.39951	-3.95347	7.7e-05	0.000453459
70	VIT_206s0061g00230	379.316	-1.58162	0.207736	-7.61358	2.67e-14	7.14e-13
71	VIT_214s0036g00630	375.07	-1.58168	0.232099	-6.81468	9.45e-12	1.84e-10
72	VIT_218s0001g12280	28.363	-1.58365	0.585015	-2.70703	0.00678881	0.022661
73	VIT_207s0005g01320	539.004	-1.58575	0.252177	-6.28825	3.21e-10	5.02e-09
74	VIT_205s0020g04500	555.596	-1.58859	0.21884	-7.25917	3.89e-13	9.15e-12
75	VIT_217s0000g02010	24.4488	-1.5889	0.648945	-2.44844	0.0143476	0.042475
76	VIT_200s0187g00360	672.489	-1.58929	0.415168	-3.82806	0.000129159	0.000720781
77	VIT_218s0001g14080	159.217	-1.59031	0.275674	-5.76881	7.98e-09	1.01e-07
78	VIT_200s0379g00070	67.4361	-1.59092	0.453566	-3.50757	0.000452215	0.00218492
79	VIT_210s0042g01390	39.1845	-1.59111	0.537272	-2.96147	0.00306176	0.0115924
80	VIT_212s0035g01950	100.726	-1.59465	0.361254	-4.4142	1.01e-05	7.34e-05
81	VIT_209s0002g07510	32.8297	-1.59557	0.391833	-4.07206	4.66e-05	0.000291323
82	VIT_219s0014g02900	493.824	-1.59572	0.323247	-4.93653	7.95e-07	7.2e-06
83	VIT_202s0012g01040	33.2888	-1.59627	0.616255	-2.59028	0.00958979	0.0304094
84	VIT_202s0012g01550	87.0355	-1.59683	0.360635	-4.42784	9.52e-06	6.92e-05
85	VIT_210s0003g04270	321.536	-1.59763	0.371268	-4.30318	1.68e-05	0.000115514
86	VIT_214s0108g00100	34.4654	-1.59849	0.514295	-3.10813	0.00188278	0.00763353
87	VIT_217s0000g03940	2915.27	-1.60086	0.228372	-7.00988	2.39e-12	5.05e-11
88	VIT_207s0005g03930	481.431	-1.60298	0.147543	-10.8645	1.7e-27	1.39e-25
89	VIT_206s0004g04100	198.212	-1.60342	0.318948	-5.02722	4.98e-07	4.69e-06
90	VIT_210s0003g00660	27.7706	-1.60579	0.494927	-3.24449	0.00117661	0.00506994
91	VIT_207s0129g01050	2953.46	-1.60623	0.1793	-8.95833	3.3e-19	1.47e-17
92	VIT_219s0014g04710	1118.64	-1.60723	0.148476	-10.8249	2.62e-27	2.12e-25
93	VIT_217s0000g02200	101.137	-1.60748	0.381895	-4.20922	2.56e-05	0.000169769
94	VIT_219s0014g04850	48.4012	-1.6078	0.660583	-2.43391	0.0149367	0.0438923
95	VIT_202s0025g03170	220.818	-1.60792	0.242795	-6.62254	3.53e-11	6.29e-10
96	VIT_214s0060g01220	25.5058	-1.60828	0.578256	-2.78126	0.0054148	0.018781
97	VIT_207s0005g04340	482.515	-1.60863	0.226038	-7.11661	1.11e-12	2.47e-11
98	VIT_200s0525g00020	47.387	-1.60871	0.497773	-3.23181	0.00123009	0.00527062
99	VIT_209s0002g06540	51.5269	-1.60973	0.38406	-4.19134	2.77e-05	0.00018258
100	VIT_202s0087g00170	593.98	-1.61146	0.195058	-8.26143	1.44e-16	5.01e-15
101	VIT_200s0463g00020	7341.26	-1.61276	0.188626	-8.55004	1.23e-17	4.81e-16
102	VIT_201s0010g00060	539.778	-1.61356	0.50246	-3.21131	0.0013213	0.00559981
103	VIT_215s0048g02970	48.8617	-1.615	0.582279	-2.77358	0.00554439	0.0191574
104	VIT_211s0016g02830	2247.06	-1.61593	0.180435	-8.95578	3.37e-19	1.5e-17
105	VIT_216s0039g02110	122.474	-1.61609	0.281315	-5.74474	9.21e-09	1.15e-07
106	VIT_211s0052g00100	5222.86	-1.61634	0.279139	-5.79045	7.02e-09	9.01e-08
107	VIT_200s0533g00050	303.18	-1.61786	0.322492	-5.01674	5.26e-07	4.92e-06
108	VIT_211s0016g03010	220.73	-1.61806	0.299858	-5.3961	6.81e-08	7.49e-07
109	VIT_207s0130g00180	104.547	-1.6197	0.340814	-4.75245	2.01e-06	1.68e-05
110	VIT_214s0128g00850	184.987	-1.62167	0.249527	-6.49899	8.09e-11	1.37e-09
111	VIT_202s0025g00220	22.1098	-1.62585	0.676516	-2.40327	0.0162494	0.0470896
112	VIT_206s0004g01460	220.916	-1.62675	0.254385	-6.39482	1.61e-10	2.62e-09
113	VIT_214s0083g01020	500.988	-1.62712	0.19517	-8.33692	7.62e-17	2.72e-15
114	VIT_211s0103g00550	252.898	-1.628	0.423176	-3.84711	0.000119518	0.000671302
115	VIT_200s0214g00160	68.8046	-1.62856	0.493014	-3.30327	0.000955656	0.00422375
116	VIT_205s0020g02210	185.937	-1.63077	0.349802	-4.66197	3.13e-06	2.5e-05
117	VIT_203s0088g00620	775.24	-1.63155	0.453594	-3.59694	0.00032198	0.00160906
118	VIT_219s0015g00460	144.891	-1.63199	0.224163	-7.28035	3.33e-13	7.87e-12
119	VIT_214s0030g02110	37.0602	-1.63229	0.636974	-2.56257	0.01039	0.0325251
120	VIT_206s0004g07770	101.408	-1.63353	0.5042	-3.23984	0.00119597	0.00514525
121	VIT_213s0084g00160	2434.89	-1.63496	0.137226	-11.9144	9.96e-33	1.12e-30
122	VIT_212s0055g00830	70.4006	-1.6351	0.379799	-4.30518	1.67e-05	0.000114513
123	VIT_200s1217g00010	781.976	-1.63546	0.161157	-10.1483	3.37e-24	2.24e-22
124	VIT_216s0098g01810	594.98	-1.63727	0.233252	-7.01933	2.23e-12	4.73e-11
125	VIT_214s0066g01640	31.1523	-1.63772	0.508152	-3.22289	0.00126904	0.00541228
126	VIT_211s0118g00590	251.626	-1.63835	0.248048	-6.60498	3.98e-11	7.01e-10
127	VIT_202s0012g01590	51.2329	-1.6384	0.665029	-2.46364	0.0137532	0.0410532
128	VIT_208s0007g07060	78.3177	-1.63961	0.434699	-3.77184	0.00016205	0.000880638
129	VIT_203s0063g00520	28.1977	-1.642	0.523509	-3.13653	0.00170957	0.00702231
130	VIT_219s0014g01710	1448.9	-1.64454	0.205145	-8.01648	1.09e-15	3.38e-14
131	VIT_213s0067g02690	87.6233	-1.64516	0.292979	-5.61529	1.96e-08	2.35e-07
132	VIT_218s0001g07770	1298.43	-1.6454	0.240144	-6.85173	7.3e-12	1.44e-10
133	VIT_214s0060g01820	28.0302	-1.64567	0.687366	-2.39417	0.016658	0.0481129
134	VIT_206s0004g02390	435.474	-1.64802	0.271773	-6.06396	1.33e-09	1.91e-08
135	VIT_200s0299g00070	45.8761	-1.64829	0.527785	-3.12303	0.00179002	0.00731185
136	VIT_210s0042g00100	68.9757	-1.64855	0.374651	-4.40022	1.08e-05	7.77e-05
137	VIT_207s0005g01750	21.8888	-1.64948	0.690067	-2.39032	0.0168336	0.0485539
138	VIT_204s0023g00760	129.661	-1.65045	0.337045	-4.89681	9.74e-07	8.71e-06
139	VIT_211s0016g03590	91.743	-1.65054	0.404604	-4.07939	4.52e-05	0.000283499
140	VIT_209s0002g05490	1680.22	-1.65239	0.428098	-3.85985	0.000113458	0.000640086
141	VIT_218s0001g01940	814.819	-1.65305	0.214324	-7.71286	1.23e-14	3.39e-13
142	VIT_204s0008g00120	48.5145	-1.65365	0.636887	-2.59646	0.00941907	0.0299477
143	VIT_203s0063g02040	351.203	-1.6566	0.197146	-8.40289	4.36e-17	1.6e-15
144	VIT_217s0000g08080	3288.54	-1.65729	0.262079	-6.32361	2.56e-10	4.03e-09
145	VIT_215s0107g00300	15.159	-1.65874	0.675452	-2.45575	0.0140592	0.0417378
146	VIT_200s2582g00010	81.0613	-1.6623	0.30726	-5.41008	6.3e-08	6.97e-07
147	VIT_207s0104g00600	228.851	-1.66318	0.418357	-3.9755	7.02e-05	0.000417971
148	VIT_208s0007g07590	100.263	-1.66366	0.359604	-4.62638	3.72e-06	2.93e-05
149	VIT_217s0000g09190	1417.59	-1.66607	0.186972	-8.91082	5.07e-19	2.2e-17
150	VIT_204s0008g01880	470.428	-1.66639	0.203196	-8.20087	2.39e-16	8.1e-15
151	VIT_217s0000g09760	144.488	-1.66904	0.409504	-4.07576	4.59e-05	0.000287193
152	VIT_214s0060g02090	37.4193	-1.66943	0.68153	-2.44954	0.0143039	0.0423917
153	VIT_216s0100g00400	1171.89	-1.6698	0.418474	-3.9902	6.6e-05	0.000396098
154	VIT_206s0080g01120	28.401	-1.67038	0.610207	-2.73739	0.00619282	0.0210247
155	VIT_212s0028g03020	135.249	-1.67166	0.378763	-4.41348	1.02e-05	7.36e-05
156	VIT_207s0031g01760	154.791	-1.67733	0.318263	-5.27028	1.36e-07	1.43e-06
157	VIT_215s0046g01420	42.9392	-1.67934	0.637884	-2.63267	0.00847175	0.0273458
158	VIT_215s0048g01830	52.3052	-1.67941	0.420617	-3.99274	6.53e-05	0.000392631
159	VIT_215s0046g00030	17.8993	-1.68139	0.684439	-2.45659	0.0140261	0.041672
160	VIT_214s0128g00700	13.4094	-1.6818	0.6581	-2.55554	0.0106022	0.0331111
161	VIT_217s0000g03610	699.234	-1.68206	0.13334	-12.6148	1.75e-36	2.42e-34
162	VIT_212s0057g00570	215.372	-1.68232	0.271044	-6.20684	5.41e-10	8.24e-09
163	VIT_208s0007g04780	59.9339	-1.6837	0.592612	-2.84114	0.00449521	0.0160255
164	VIT_201s0011g05380	78.7359	-1.68583	0.590212	-2.85632	0.00428589	0.0154409
165	VIT_207s0005g00160	20.9786	-1.68677	0.584213	-2.88726	0.00388615	0.0142181
166	VIT_215s0021g01150	29.6822	-1.68801	0.44902	-3.75932	0.000170374	0.000921151
167	VIT_216s0013g01510	15.7012	-1.68857	0.666669	-2.53285	0.0113141	0.0349195
168	VIT_219s0090g00920	204.54	-1.69025	0.284945	-5.93183	3e-09	4.06e-08
169	VIT_214s0006g00520	16.7364	-1.69098	0.71026	-2.38079	0.0172756	0.0496039
170	VIT_215s0045g01340	118.211	-1.69102	0.336539	-5.02473	5.04e-07	4.74e-06
171	VIT_208s0007g07130	409.19	-1.69182	0.25033	-6.75835	1.4e-11	2.67e-10
172	VIT_206s0009g02840	75.6131	-1.69432	0.673702	-2.51494	0.0119054	0.0364556
173	VIT_201s0026g00670	115.333	-1.69816	0.33292	-5.10081	3.38e-07	3.29e-06
174	VIT_214s0066g00200	225.704	-1.69817	0.209605	-8.10175	5.42e-16	1.75e-14
175	VIT_214s0068g01240	36.7702	-1.69817	0.440591	-3.8543	0.000116063	0.000653625
176	VIT_216s0039g01910	184.049	-1.69824	0.510002	-3.32987	0.000868868	0.00388426
177	VIT_202s0087g00910	6846.45	-1.70024	0.175023	-9.71437	2.62e-22	1.51e-20
178	VIT_206s0004g04140	79.4202	-1.70113	0.461665	-3.68476	0.000228918	0.00119142
179	VIT_200s0270g00090	22.2485	-1.7013	0.589914	-2.88398	0.00392688	0.0143507
180	VIT_218s0041g02270	181.103	-1.70572	0.352319	-4.8414	1.29e-06	1.12e-05
181	VIT_219s0014g01470	57.6362	-1.70612	0.480967	-3.54726	0.000389261	0.00190928
182	VIT_214s0108g01450	211.615	-1.70977	0.329695	-5.18592	2.15e-07	2.16e-06
183	VIT_218s0001g13250	4414.38	-1.71148	0.178031	-9.61341	7.02e-22	3.94e-20
184	VIT_214s0171g00140	39.6006	-1.7123	0.591022	-2.89719	0.00376527	0.0138476
185	VIT_202s0025g03680	60.0375	-1.71459	0.455579	-3.76354	0.000167526	0.000907552
186	VIT_218s0089g01050	72.0181	-1.71529	0.549202	-3.12324	0.00178874	0.00730819
187	VIT_214s0066g00850	381.694	-1.71626	0.238558	-7.1943	6.28e-13	1.44e-11
188	VIT_208s0040g01620	19.5314	-1.71657	0.698296	-2.45823	0.0139624	0.0415345
189	VIT_204s0008g01480	107.719	-1.71676	0.303315	-5.65998	1.51e-08	1.84e-07
190	VIT_211s0016g04640	55.917	-1.71784	0.393426	-4.36636	1.26e-05	8.94e-05
191	VIT_208s0056g01270	231.03	-1.71796	0.274893	-6.24954	4.12e-10	6.37e-09
192	VIT_213s0019g00590	381.198	-1.71798	0.214632	-8.00434	1.2e-15	3.71e-14
193	VIT_216s0022g00960	65.02	-1.72397	0.609059	-2.83055	0.00464677	0.0165103
194	VIT_208s0040g01920	44.2289	-1.72448	0.448078	-3.84863	0.000118782	0.00066736
195	VIT_201s0026g01280	22.8275	-1.72458	0.532933	-3.23601	0.00121213	0.0052042
196	VIT_214s0066g00360	131.389	-1.72469	0.326019	-5.29015	1.22e-07	1.29e-06
197	VIT_217s0000g03790	1358.43	-1.72489	0.249798	-6.90514	5.02e-12	1.02e-10
198	VIT_214s0030g01370	28.2323	-1.73418	0.443863	-3.90701	9.34e-05	0.000540109
199	VIT_212s0028g03790	688.304	-1.7371	0.250089	-6.94593	3.76e-12	7.79e-11
200	VIT_218s0001g05810	629.906	-1.73719	0.251454	-6.90861	4.89e-12	9.97e-11
201	VIT_218s0001g09090	31.1231	-1.73732	0.621562	-2.79508	0.00518866	0.0181172
202	VIT_215s0048g02220	42.8818	-1.73791	0.427903	-4.06147	4.88e-05	0.00030357
203	VIT_210s0116g00900	59.1414	-1.73922	0.444457	-3.91313	9.11e-05	0.000527892
204	VIT_218s0041g00630	219.253	-1.74096	0.271734	-6.40685	1.49e-10	2.44e-09
205	VIT_211s0016g04270	257.424	-1.74196	0.248775	-7.00214	2.52e-12	5.31e-11
206	VIT_219s0014g01740	187.655	-1.74227	0.286199	-6.08762	1.15e-09	1.66e-08
207	VIT_218s0001g03080	19.0601	-1.74335	0.498596	-3.49652	0.000471363	0.00226482
208	VIT_209s0002g06030	248.505	-1.74497	0.26214	-6.65663	2.8e-11	5.09e-10
209	VIT_212s0142g00200	119.78	-1.74527	0.33189	-5.25857	1.45e-07	1.51e-06
210	VIT_203s0038g00400	172.842	-1.74757	0.274961	-6.35569	2.07e-10	3.34e-09
211	VIT_203s0091g00440	304.601	-1.74915	0.262036	-6.67522	2.47e-11	4.54e-10
212	VIT_204s0044g01260	477.353	-1.74993	0.206749	-8.46404	2.58e-17	9.76e-16
213	VIT_200s0956g00010	29.1725	-1.74999	0.584002	-2.99656	0.00273046	0.010495
214	VIT_212s0035g00350	233.152	-1.7509	0.252737	-6.92777	4.28e-12	8.76e-11
215	VIT_210s0003g02890	31937.6	-1.75096	0.15513	-11.287	1.52e-29	1.38e-27
216	VIT_200s0229g00100	31.6744	-1.75126	0.59992	-2.91916	0.00350978	0.0130488
217	VIT_203s0063g00680	6878.19	-1.75171	0.151452	-11.5661	6.12e-31	6.28e-29
218	VIT_200s0194g00190	49.4571	-1.75233	0.60375	-2.90241	0.00370304	0.0136595
219	VIT_209s0002g04020	636.304	-1.75301	0.222125	-7.89201	2.97e-15	8.91e-14
220	VIT_213s0047g00080	98.7412	-1.75388	0.460747	-3.80661	0.000140887	0.000778039
221	VIT_217s0000g06600	37.3441	-1.75428	0.497303	-3.52758	0.000419372	0.00203811
222	VIT_203s0038g02520	1109.34	-1.75444	0.213164	-8.23049	1.86e-16	6.41e-15
223	VIT_205s0020g01840	290.059	-1.75451	0.218163	-8.04219	8.82e-16	2.76e-14
224	VIT_214s0128g00820	19.8045	-1.7559	0.715166	-2.45523	0.0140795	0.0417853
225	VIT_214s0066g01480	59.5915	-1.75725	0.499334	-3.51919	0.000432861	0.00209672
226	VIT_219s0014g03190	114.403	-1.75749	0.430954	-4.07814	4.54e-05	0.000284787
227	VIT_213s0064g00580	268.501	-1.76	0.264956	-6.64259	3.08e-11	5.57e-10
228	VIT_211s0016g01300	668.698	-1.76023	0.303309	-5.80343	6.5e-09	8.39e-08
229	VIT_208s0007g03670	44.1593	-1.76159	0.613608	-2.87087	0.00409347	0.014874
230	VIT_210s0071g00770	42.3217	-1.76265	0.609714	-2.89095	0.00384076	0.0140818
231	VIT_204s0008g01740	19.4085	-1.7627	0.626513	-2.81351	0.00490038	0.0172381
232	VIT_212s0055g00020	3355.44	-1.76473	0.202287	-8.72388	2.69e-18	1.11e-16
233	VIT_207s0031g01400	22.0813	-1.76975	0.558321	-3.16978	0.00152556	0.0063554
234	VIT_209s0096g00490	372.486	-1.77023	0.366636	-4.8283	1.38e-06	1.19e-05
235	VIT_201s0150g00280	86.1231	-1.77138	0.383177	-4.62286	3.78e-06	2.98e-05
236	VIT_214s0081g00500	1501.44	-1.77232	0.19222	-9.22027	2.96e-20	1.44e-18
237	VIT_218s0001g12800	724.95	-1.77587	0.316507	-5.61082	2.01e-08	2.41e-07
238	VIT_213s0019g02940	474.516	-1.77868	0.448219	-3.96833	7.24e-05	0.00042981
239	VIT_203s0063g01790	507.919	-1.78301	0.321359	-5.54835	2.88e-08	3.36e-07
240	VIT_205s0020g00880	394.863	-1.78388	0.131365	-13.5796	5.29e-42	1e-39
241	VIT_204s0023g01060	46.3062	-1.78592	0.538731	-3.31506	0.000916248	0.00407411
242	VIT_201s0010g03600	8342.63	-1.78684	0.185767	-9.61873	6.67e-22	3.75e-20
243	VIT_206s0004g06840	6901.05	-1.78993	0.220242	-8.12712	4.4e-16	1.44e-14
244	VIT_213s0019g00850	134.261	-1.79688	0.260658	-6.89365	5.44e-12	1.1e-10
245	VIT_214s0066g01430	191.435	-1.79778	0.236607	-7.59816	3e-14	8e-13
246	VIT_217s0000g01640	340.246	-1.79902	0.274581	-6.55188	5.68e-11	9.82e-10
247	VIT_204s0023g00750	294.154	-1.79952	0.218628	-8.23097	1.86e-16	6.4e-15
248	VIT_214s0171g00120	143.188	-1.80116	0.331043	-5.44085	5.3e-08	5.91e-07
249	VIT_208s0007g07540	148.219	-1.802	0.208727	-8.63329	5.96e-18	2.39e-16
250	VIT_215s0048g02820	219.826	-1.80723	0.329302	-5.48806	4.06e-08	4.63e-07
251	VIT_212s0028g01740	4078.09	-1.80733	0.160366	-11.2701	1.84e-29	1.66e-27
252	VIT_219s0027g00350	64.7415	-1.80892	0.448501	-4.03325	5.5e-05	0.000338144
253	VIT_203s0017g02000	1480.61	-1.80918	0.298045	-6.07016	1.28e-09	1.84e-08
254	VIT_212s0057g00630	12917.8	-1.81059	0.191948	-9.43275	3.99e-21	2.12e-19
255	VIT_200s0434g00010	23.2145	-1.81167	0.639202	-2.83427	0.00459299	0.0163314
256	VIT_202s0025g00150	32.2157	-1.81666	0.513091	-3.54063	0.000399179	0.00195241
257	VIT_202s0033g01190	111.255	-1.81709	0.32054	-5.66883	1.44e-08	1.76e-07
258	VIT_208s0007g07960	26.9694	-1.81954	0.552929	-3.29072	0.000999308	0.00439529
259	VIT_215s0046g01560	60977.6	-1.82004	0.22195	-8.20025	2.4e-16	8.12e-15
260	VIT_200s0780g00020	34.1927	-1.82015	0.480299	-3.78961	0.000150886	0.000827271
261	VIT_205s0077g01000	332.529	-1.82485	0.245093	-7.44555	9.65e-14	2.47e-12
262	VIT_205s0020g04220	50.6066	-1.82621	0.499978	-3.65257	0.000259627	0.00133486
263	VIT_207s0031g00850	45.6357	-1.82936	0.503891	-3.63046	0.000282915	0.00143564
264	VIT_217s0000g03890	83.2145	-1.82965	0.435751	-4.19885	2.68e-05	0.000176995
265	VIT_215s0048g00810	20.3654	-1.83044	0.752209	-2.43342	0.0149569	0.0439312
266	VIT_218s0041g00420	248.686	-1.83078	0.276159	-6.62944	3.37e-11	6.03e-10
267	VIT_206s0004g06900	12.7652	-1.83373	0.705997	-2.59736	0.00939433	0.0298889
268	VIT_208s0007g02380	71.7476	-1.83499	0.627084	-2.92622	0.00343108	0.0127994
269	VIT_212s0055g00050	746.219	-1.83675	0.207343	-8.8585	8.11e-19	3.48e-17
270	VIT_203s0063g00050	2252.03	-1.83734	0.17368	-10.5789	3.73e-26	2.78e-24
271	VIT_218s0001g13210	222.224	-1.83762	0.307781	-5.97055	2.36e-09	3.26e-08
272	VIT_211s0016g02960	160.293	-1.84294	0.277429	-6.64292	3.08e-11	5.57e-10
273	VIT_211s0149g00300	49.3837	-1.84307	0.50272	-3.66619	0.000246191	0.00127403
274	VIT_210s0003g04180	4234.44	-1.84323	0.238889	-7.71586	1.2e-14	3.32e-13
275	VIT_202s0025g04920	103.772	-1.84348	0.442235	-4.16855	3.07e-05	0.000200032
276	VIT_211s0016g05810	32.8412	-1.84456	0.551238	-3.34621	0.000819232	0.00368655
277	VIT_205s0020g03850	27.4811	-1.84472	0.704646	-2.61794	0.00884625	0.0283579
278	VIT_212s0034g00030	3720.64	-1.84651	0.178575	-10.3402	4.63e-25	3.31e-23
279	VIT_204s0023g02440	31.811	-1.84737	0.466872	-3.9569	7.59e-05	0.000448384
280	VIT_206s0004g08070	23.8021	-1.849	0.594166	-3.11193	0.00185872	0.0075456
281	VIT_210s0003g02900	9450.97	-1.84909	0.183765	-10.0623	8.11e-24	5.26e-22
282	VIT_201s0011g05310	36.0686	-1.84954	0.55725	-3.31904	0.000903265	0.00402107
283	VIT_206s0009g03050	34.2647	-1.85059	0.617451	-2.99714	0.00272525	0.0104792
284	VIT_215s0048g01130	88.7964	-1.85156	0.409953	-4.51652	6.29e-06	4.75e-05
285	VIT_206s0061g00790	1605.92	-1.85236	0.125188	-14.7966	1.54e-49	4.66e-47
286	VIT_200s1356g00010	38.1494	-1.85366	0.706881	-2.62232	0.00873344	0.0280552
287	VIT_206s0080g00310	299.355	-1.85493	0.245016	-7.57065	3.71e-14	9.81e-13
288	VIT_218s0001g12090	64.0389	-1.85506	0.459105	-4.04061	5.33e-05	0.000328763
289	VIT_212s0055g00320	64.2659	-1.85617	0.492584	-3.76822	0.000164418	0.000892739
290	VIT_209s0002g00750	48.038	-1.85661	0.475318	-3.90604	9.38e-05	0.000541638
291	VIT_212s0028g01980	180.196	-1.8576	0.230064	-8.07428	6.79e-16	2.17e-14
292	VIT_206s0061g00890	351.975	-1.85871	0.188298	-9.87107	5.56e-23	3.38e-21
293	VIT_210s0003g01760	16.2778	-1.85925	0.648415	-2.86737	0.00413899	0.0150137
294	VIT_213s0067g02100	33.7306	-1.86292	0.409093	-4.55378	5.27e-06	4.04e-05
295	VIT_207s0197g00060	102.119	-1.86379	0.77514	-2.40445	0.0161968	0.04698
296	VIT_201s0026g02210	29.3868	-1.86388	0.517134	-3.60425	0.000313056	0.00156808
297	VIT_213s0047g01110	169.414	-1.86488	0.230386	-8.09459	5.75e-16	1.85e-14
298	VIT_209s0002g06970	271.935	-1.86544	0.29732	-6.27417	3.51e-10	5.47e-09
299	VIT_219s0014g04770	75.6243	-1.86716	0.349468	-5.34286	9.15e-08	9.82e-07
300	VIT_202s0033g00930	47.9825	-1.86804	0.611356	-3.05557	0.00224631	0.00886993
301	VIT_218s0001g14500	3323.92	-1.86813	0.259132	-7.20917	5.63e-13	1.3e-11
302	VIT_219s0014g05340	14.8495	-1.86819	0.760719	-2.45582	0.0140564	0.0417378
303	VIT_206s0004g00590	54.5994	-1.86851	0.403328	-4.63274	3.61e-06	2.85e-05
304	VIT_206s0004g03170	54.0845	-1.86919	0.387661	-4.82172	1.42e-06	1.23e-05
305	VIT_208s0056g01410	51.0316	-1.87131	0.405607	-4.61361	3.96e-06	3.1e-05
306	VIT_208s0040g01760	1098.61	-1.87573	0.188905	-9.92944	3.1e-23	1.93e-21
307	VIT_218s0001g11990	49.3397	-1.87678	0.5088	-3.68864	0.000225456	0.00117533
308	VIT_216s0039g02570	235.579	-1.87771	0.227587	-8.25053	1.58e-16	5.48e-15
309	VIT_209s0002g05400	4408.2	-1.87851	0.597586	-3.14351	0.00166937	0.00688684
310	VIT_213s0156g00120	568.554	-1.87864	0.223208	-8.41657	3.88e-17	1.43e-15
311	VIT_206s0004g00045	25.9949	-1.87902	0.599286	-3.13543	0.00171605	0.00703981
312	VIT_213s0156g00030	15.9868	-1.87925	0.742723	-2.53022	0.0113992	0.0351312
313	VIT_203s0063g01150	1275.13	-1.88006	0.281891	-6.66944	2.57e-11	4.71e-10
314	VIT_214s0060g02200	76.7585	-1.88159	0.427474	-4.40164	1.07e-05	7.73e-05
315	VIT_214s0108g00690	64.5589	-1.88743	0.658117	-2.86792	0.00413181	0.0149933
316	VIT_210s0003g03790	413.764	-1.8882	0.538695	-3.50513	0.000456376	0.00220341
317	VIT_212s0055g00060	18.745	-1.88969	0.735871	-2.56797	0.0102297	0.0320812
318	VIT_212s0055g00070	44.3023	-1.88977	0.779718	-2.42366	0.015365	0.0449776
319	VIT_216s0039g00940	18.6179	-1.89307	0.707478	-2.67581	0.00745494	0.0245327
320	VIT_215s0046g02070	127.467	-1.89485	0.372798	-5.08277	3.72e-07	3.59e-06
321	VIT_214s0006g00920	267.634	-1.89558	0.26288	-7.21082	5.56e-13	1.28e-11
322	VIT_212s0035g00810	39.5593	-1.89703	0.513074	-3.69738	0.00021784	0.00113905
323	VIT_200s0283g00030	2043.74	-1.89715	0.252123	-7.52473	5.28e-14	1.38e-12
324	VIT_202s0087g00760	61.1991	-1.89836	0.465244	-4.08035	4.5e-05	0.000282542
325	VIT_208s0007g01270	153.806	-1.90065	0.344228	-5.52149	3.36e-08	3.88e-07
326	VIT_207s0005g04480	133.287	-1.90111	0.290602	-6.54195	6.07e-11	1.05e-09
327	VIT_218s0001g05530	230.635	-1.90368	0.390724	-4.87217	1.1e-06	9.76e-06
328	VIT_213s0084g00360	52.5821	-1.90537	0.537371	-3.54572	0.000391536	0.00191945
329	VIT_201s0011g04280	145.541	-1.90767	0.268878	-7.09491	1.29e-12	2.85e-11
330	VIT_210s0003g00160	54.6616	-1.90842	0.512982	-3.72025	0.000199024	0.00105571
331	VIT_209s0096g00090	1237.1	-1.90915	0.251177	-7.60083	2.94e-14	7.86e-13
332	VIT_206s0004g02640	68.025	-1.9092	0.408583	-4.67274	2.97e-06	2.38e-05
333	VIT_207s0005g00050	88.0823	-1.91119	0.336474	-5.68006	1.35e-08	1.66e-07
334	VIT_218s0001g15720	139.272	-1.91148	0.316309	-6.0431	1.51e-09	2.15e-08
335	VIT_209s0054g01410	53.5258	-1.91195	0.756775	-2.52645	0.0115221	0.0354585
336	VIT_205s0029g01130	22.4757	-1.91283	0.599012	-3.19331	0.00140654	0.00591508
337	VIT_215s0048g02860	129.434	-1.91517	0.478925	-3.99888	6.36e-05	0.000383541
338	VIT_206s0004g05170	48.5721	-1.91573	0.631332	-3.03443	0.00240994	0.00943989
339	VIT_206s0004g04130	66.731	-1.91669	0.487473	-3.93189	8.43e-05	0.000492075
340	VIT_219s0014g02920	27.1955	-1.91685	0.580026	-3.30476	0.000950576	0.00420227
341	VIT_216s0100g00720	497.578	-1.91735	0.28733	-6.67299	2.51e-11	4.6e-10
342	VIT_209s0002g00260	18.1408	-1.91885	0.70649	-2.71604	0.00660682	0.0221621
343	VIT_200s0415g00030	2894.37	-1.92093	0.143535	-13.3831	7.6e-41	1.34e-38
344	VIT_206s0004g05150	787.816	-1.92942	0.196438	-9.82202	9.05e-23	5.4e-21
345	VIT_218s0001g09290	52.1293	-1.93321	0.494911	-3.90619	9.38e-05	0.000541468
346	VIT_212s0059g01590	129.622	-1.93492	0.543375	-3.56093	0.000369546	0.00182007
347	VIT_207s0129g00400	940.316	-1.93575	0.133179	-14.535	7.27e-48	1.95e-45
348	VIT_206s0004g06480	309.773	-1.93773	0.368231	-5.26226	1.42e-07	1.49e-06
349	VIT_210s0003g01490	26.6896	-1.94745	0.762649	-2.55353	0.0106637	0.0332783
350	VIT_211s0016g05490	68.3622	-1.94745	0.346343	-5.62289	1.88e-08	2.25e-07
351	VIT_218s0001g13970	449.198	-1.95064	0.305328	-6.38865	1.67e-10	2.73e-09
352	VIT_214s0108g00150	172.729	-1.95098	0.415739	-4.69281	2.69e-06	2.18e-05
353	VIT_218s0072g00550	9295.33	-1.95109	0.182518	-10.6898	1.14e-26	8.67e-25
354	VIT_219s0014g01630	69.1222	-1.95149	0.335223	-5.82148	5.83e-09	7.58e-08
355	VIT_217s0000g00160	2528.7	-1.95431	0.148989	-13.1172	2.63e-39	4.35e-37
356	VIT_201s0010g00680	5586.54	-1.95488	0.133406	-14.6536	1.28e-48	3.75e-46
357	VIT_209s0002g08660	124.393	-1.95962	0.279657	-7.00722	2.43e-12	5.13e-11
358	VIT_210s0003g03510	1173.97	-1.96147	0.2098	-9.34923	8.83e-21	4.54e-19
359	VIT_206s0061g01390	2090.69	-1.96346	0.428976	-4.57709	4.71e-06	3.65e-05
360	VIT_217s0053g00670	31.6874	-1.96503	0.61817	-3.17879	0.00147893	0.00618272
361	VIT_215s0048g00680	65.5848	-1.96654	0.484931	-4.0553	5.01e-05	0.000311088
362	VIT_201s0026g01660	445.905	-1.96763	0.171546	-11.47	1.87e-30	1.84e-28
363	VIT_217s0000g01080	45.528	-1.97112	0.66752	-2.9529	0.003148	0.0118703
364	VIT_207s0185g00040	77.4628	-1.97116	0.376862	-5.23045	1.69e-07	1.74e-06
365	VIT_205s0020g01385	12.6084	-1.97185	0.706283	-2.79187	0.00524042	0.0182758
366	VIT_201s0010g00600	1175.54	-1.97273	0.193772	-10.1807	2.42e-24	1.64e-22
367	VIT_212s0028g02170	507.462	-1.97412	0.166484	-11.8577	1.96e-32	2.16e-30
368	VIT_218s0001g07750	47.71	-1.97462	0.49922	-3.95542	7.64e-05	0.000450186
369	VIT_201s0011g01680	58.5005	-1.97503	0.410989	-4.80557	1.54e-06	1.32e-05
370	VIT_217s0000g02430	34.8529	-1.98105	0.776628	-2.55084	0.0107463	0.0334922
371	VIT_212s0057g00613	149.749	-1.9852	0.419627	-4.73086	2.24e-06	1.84e-05
372	VIT_206s0009g03755	23.6785	-1.98546	0.655691	-3.02805	0.00246141	0.00960993
373	VIT_206s0009g03670	765.031	-1.98555	0.184646	-10.7533	5.72e-27	4.45e-25
374	VIT_201s0011g06020	36.0687	-1.98556	0.780252	-2.54477	0.010935	0.033975
375	VIT_200s2776g00010	71.0456	-1.98702	0.567587	-3.50081	0.00046384	0.00223318
376	VIT_207s0151g00540	334.353	-1.98911	0.256246	-7.76251	8.33e-15	2.35e-13
377	VIT_218s0001g06910	16.1904	-1.99244	0.825173	-2.41457	0.0157537	0.0459392
378	VIT_200s2851g00010	2068.17	-1.99343	0.83522	-2.38671	0.0169999	0.0489587
379	VIT_218s0001g04580	489.086	-1.99411	0.19758	-10.0926	5.95e-24	3.89e-22
380	VIT_207s0005g00470	64.6714	-1.99604	0.395506	-5.0468	4.49e-07	4.26e-06
381	VIT_204s0044g00300	37.9706	-1.99764	0.582145	-3.43151	0.000600225	0.00280487
382	VIT_200s1286g00010	2134.41	-1.99809	0.430016	-4.64655	3.38e-06	2.68e-05
383	VIT_219s0014g03500	233.721	-2.00079	0.29315	-6.82514	8.78e-12	1.72e-10
384	VIT_201s0011g05660	147.298	-2.00434	0.343404	-5.83668	5.33e-09	6.97e-08
385	VIT_212s0059g01370	14.7686	-2.0044	0.809575	-2.47587	0.0132913	0.0398901
386	VIT_201s0011g05670	176.487	-2.00639	0.313229	-6.40551	1.5e-10	2.46e-09
387	VIT_208s0058g00490	93.7815	-2.00923	0.395473	-5.08058	3.76e-07	3.63e-06
388	VIT_200s1274g00010	737.334	-2.01234	0.189507	-10.6188	2.44e-26	1.83e-24
389	VIT_211s0078g00180	16.0316	-2.01274	0.696127	-2.89134	0.00383599	0.014067
390	VIT_200s0346g00110	55.5069	-2.01343	0.626728	-3.21261	0.00131534	0.00558325
391	VIT_214s0081g00690	40.8206	-2.01411	0.531222	-3.79147	0.000149761	0.000821811
392	VIT_213s0084g00420	49.2009	-2.01509	0.594644	-3.38874	0.000702148	0.00321837
393	VIT_215s0107g00290	61.2228	-2.01814	0.527975	-3.82241	0.000132155	0.000735797
394	VIT_200s1251g00010	24.8755	-2.01827	0.630941	-3.19883	0.00137987	0.00581705
395	VIT_207s0031g01980	457.64	-2.01957	0.758186	-2.66369	0.00772879	0.0253121
396	VIT_201s0010g02480	343.398	-2.02004	0.235161	-8.59002	8.7e-18	3.42e-16
397	VIT_211s0016g02126	766.308	-2.02144	0.286728	-7.05001	1.79e-12	3.84e-11
398	VIT_207s0031g00500	31.1867	-2.02194	0.807333	-2.50446	0.0122637	0.037355
399	VIT_208s0058g01110	85.578	-2.02404	0.420969	-4.80805	1.52e-06	1.3e-05
400	VIT_214s0060g00870	20.0324	-2.02844	0.723265	-2.80456	0.00503854	0.0176654
401	VIT_202s0025g03950	67.4299	-2.02881	0.385285	-5.26573	1.4e-07	1.46e-06
402	VIT_200s0231g00070	149.307	-2.0324	0.338401	-6.00589	1.9e-09	2.68e-08
403	VIT_204s0008g02500	34.608	-2.03431	0.54373	-3.7414	0.000183001	0.000981081
404	VIT_218s0001g14760	55.9064	-2.03504	0.547715	-3.71551	0.000202794	0.00107064
405	VIT_205s0102g00130	725.841	-2.03534	0.222618	-9.14273	6.09e-20	2.9e-18
406	VIT_211s0037g00630	221.801	-2.03641	0.255818	-7.9604	1.71e-15	5.22e-14
407	VIT_211s0037g00820	55.6337	-2.03675	0.504712	-4.03547	5.45e-05	0.000335726
408	VIT_212s0134g00490	403.492	-2.03865	0.32978	-6.18183	6.34e-10	9.59e-09
409	VIT_218s0117g00160	160.245	-2.04033	0.270437	-7.54457	4.54e-14	1.19e-12
410	VIT_205s0077g00635	44.5203	-2.04154	0.616347	-3.31232	0.000925242	0.00411027
411	VIT_203s0038g00300	24.9179	-2.04491	0.850152	-2.40535	0.016157	0.0468861
412	VIT_214s0066g00920	115.302	-2.04979	0.365113	-5.61412	1.98e-08	2.36e-07
413	VIT_207s0104g00400	131.265	-2.0567	0.255975	-8.03477	9.38e-16	2.93e-14
414	VIT_210s0116g00540	34.0933	-2.05888	0.450821	-4.56696	4.95e-06	3.82e-05
415	VIT_203s0063g00750	1526.52	-2.06048	0.195074	-10.5625	4.44e-26	3.3e-24
416	VIT_209s0002g06810	1456.68	-2.06081	0.13473	-15.2958	8.15e-53	2.94e-50
417	VIT_211s0118g00230	149.23	-2.0614	0.357928	-5.75926	8.45e-09	1.06e-07
418	VIT_201s0011g03110	882.681	-2.06596	0.282091	-7.32374	2.41e-13	5.79e-12
419	VIT_216s0098g00950	991.343	-2.06618	0.209109	-9.88088	5.04e-23	3.09e-21
420	VIT_219s0090g01590	279.99	-2.06858	0.223872	-9.24004	2.46e-20	1.21e-18
421	VIT_213s0067g00570	41.7837	-2.0692	0.525998	-3.93386	8.36e-05	0.000488346
422	VIT_207s0141g00530	97.945	-2.07283	0.342444	-6.05306	1.42e-09	2.03e-08
423	VIT_219s0027g00750	22.4015	-2.07517	0.732373	-2.83348	0.00460438	0.0163658
424	VIT_219s0085g00350	666.791	-2.07582	0.171948	-12.0723	1.48e-33	1.76e-31
425	VIT_200s0199g00080	43.7843	-2.07619	0.807078	-2.57248	0.0100974	0.0317311
426	VIT_201s0011g05060	52.7631	-2.07911	0.43265	-4.80552	1.54e-06	1.32e-05
427	VIT_208s0056g00870	20.558	-2.08529	0.828766	-2.51614	0.0118649	0.0363667
428	VIT_219s0090g01650	79.4109	-2.08581	0.417122	-5.00049	5.72e-07	5.32e-06
429	VIT_214s0068g00810	172.79	-2.08622	0.268724	-7.76342	8.27e-15	2.34e-13
430	VIT_213s0067g00860	47.8293	-2.08695	0.363043	-5.74849	9e-09	1.13e-07
431	VIT_200s0181g00180	979.434	-2.08991	0.259459	-8.0549	7.95e-16	2.51e-14
432	VIT_217s0000g06000	23.9004	-2.09315	0.705958	-2.96498	0.00302705	0.0114778
433	VIT_208s0058g00830	16.5946	-2.09823	0.765332	-2.74159	0.0061142	0.0208059
434	VIT_218s0001g10330	882.083	-2.09832	0.480006	-4.37145	1.23e-05	8.75e-05
435	VIT_214s0081g00700	66.8759	-2.10061	0.388379	-5.40866	6.35e-08	7.02e-07
436	VIT_200s0317g00070	23.6771	-2.10099	0.87783	-2.39339	0.0166936	0.0482085
437	VIT_202s0025g04720	403.037	-2.1047	0.59466	-3.53934	0.000401129	0.00196144
438	VIT_206s0004g07820	13.0535	-2.11154	0.798114	-2.64566	0.00815306	0.0265235
439	VIT_219s0085g00490	238.82	-2.11301	0.233399	-9.05322	1.39e-19	6.4e-18
440	VIT_218s0001g09980	27.7947	-2.1143	0.766804	-2.75729	0.00582825	0.0199897
441	VIT_201s0011g00350	430.942	-2.11845	0.291894	-7.2576	3.94e-13	9.25e-12
442	VIT_217s0000g06805	27.1954	-2.12344	0.579837	-3.66213	0.000250128	0.00129116
443	VIT_215s0046g01070	350.414	-2.12437	0.215058	-9.8781	5.18e-23	3.17e-21
444	VIT_205s0077g01130	14.3241	-2.13017	0.756379	-2.81627	0.00485841	0.0171188
445	VIT_212s0059g00290	148.786	-2.13093	0.297248	-7.16886	7.56e-13	1.72e-11
446	VIT_204s0008g05870	960.65	-2.13177	0.235184	-9.06427	1.25e-19	5.81e-18
447	VIT_206s0004g05500	47.0689	-2.13755	0.506398	-4.2211	2.43e-05	0.00016174
448	VIT_212s0057g00900	59.6985	-2.14059	0.333969	-6.40955	1.46e-10	2.4e-09
449	VIT_213s0064g00680	48.3404	-2.14154	0.601832	-3.55836	0.000373174	0.00183604
450	VIT_219s0090g00420	2090.51	-2.14179	0.21718	-9.86184	6.09e-23	3.68e-21
451	VIT_218s0001g11640	65.9583	-2.14216	0.427828	-5.00706	5.53e-07	5.15e-06
452	VIT_217s0000g02050	2057.42	-2.14366	0.218843	-9.79544	1.18e-22	6.96e-21
453	VIT_200s0868g00020	1260.57	-2.14541	0.2022	-10.6103	2.67e-26	2e-24
454	VIT_217s0000g06660	37.4223	-2.1455	0.645237	-3.32514	0.000883756	0.0039425
455	VIT_218s0122g00180	3192.72	-2.15114	0.245311	-8.76902	1.8e-18	7.48e-17
456	VIT_210s0003g05670	232.135	-2.15455	0.351368	-6.1319	8.68e-10	1.29e-08
457	VIT_204s0023g02690	91.744	-2.15808	0.645121	-3.34523	0.000822142	0.0036979
458	VIT_212s0059g01190	30.5597	-2.16403	0.727735	-2.97365	0.00294276	0.0111982
459	VIT_209s0002g01030	68.8834	-2.16657	0.546111	-3.96727	7.27e-05	0.000431313
460	VIT_219s0014g01640	730.648	-2.16802	0.223701	-9.69158	3.27e-22	1.87e-20
461	VIT_200s0207g00190	153.113	-2.17262	0.338829	-6.41214	1.43e-10	2.37e-09
462	VIT_200s0194g00310	33.1091	-2.17322	0.733098	-2.96443	0.00303243	0.0114959
463	VIT_208s0007g06450	4112.82	-2.17325	0.152147	-14.2839	2.76e-46	6.5e-44
464	VIT_218s0001g14870	53.6135	-2.17564	0.532929	-4.08241	4.46e-05	0.000280296
465	VIT_219s0085g01200	236.79	-2.17677	0.23649	-9.20447	3.43e-20	1.67e-18
466	VIT_208s0040g00980	208.629	-2.17812	0.301923	-7.21415	5.43e-13	1.26e-11
467	VIT_209s0002g08260	1036.9	-2.17944	0.157	-13.8818	8.16e-44	1.66e-41
468	VIT_212s0055g00200	754.752	-2.18024	0.451027	-4.83394	1.34e-06	1.16e-05
469	VIT_213s0019g00330	119.29	-2.18073	0.512325	-4.25654	2.08e-05	0.000139978
470	VIT_208s0058g00120	1259.84	-2.18109	0.229024	-9.52341	1.68e-21	9.06e-20
471	VIT_217s0000g03520	13.3462	-2.18118	0.782566	-2.78721	0.00531635	0.0184933
472	VIT_217s0000g04090	49.5844	-2.18278	0.495602	-4.40429	1.06e-05	7.64e-05
473	VIT_207s0104g00350	91.4793	-2.18861	0.794272	-2.75549	0.00586046	0.0200678
474	VIT_208s0007g04590	113.673	-2.19284	0.364157	-6.02167	1.73e-09	2.44e-08
475	VIT_202s0241g00120	17.1662	-2.19302	0.76972	-2.84911	0.00438414	0.0156911
476	VIT_203s0097g00530	6740.83	-2.1941	0.15873	-13.8228	1.86e-43	3.69e-41
477	VIT_216s0039g01410	2072.04	-2.19772	0.178631	-12.3032	8.71e-35	1.12e-32
478	VIT_207s0130g00260	54.1525	-2.19962	0.421882	-5.21382	1.85e-07	1.89e-06
479	VIT_204s0008g04010	29.7243	-2.21356	0.663597	-3.3357	0.000850834	0.00381167
480	VIT_218s0122g00620	66.1971	-2.2197	0.649897	-3.41546	0.000636745	0.00295455
481	VIT_211s0016g02630	142.95	-2.21972	0.319224	-6.95348	3.56e-12	7.4e-11
482	VIT_206s0004g06630	39.6861	-2.22201	0.654194	-3.39656	0.000682385	0.00314036
483	VIT_209s0054g01690	18.4952	-2.22491	0.702082	-3.16902	0.00152955	0.00637064
484	VIT_213s0064g01165	25.7357	-2.22742	0.7499	-2.97029	0.00297519	0.0113013
485	VIT_217s0000g06290	205.027	-2.22929	0.263919	-8.44687	2.99e-17	1.12e-15
486	VIT_219s0014g02140	19.9907	-2.23087	0.743588	-3.00014	0.00269859	0.0103953
487	VIT_213s0067g01820	119.904	-2.23391	0.37433	-5.96775	2.41e-09	3.3e-08
488	VIT_211s0052g00500	52.3252	-2.2379	0.439403	-5.09304	3.52e-07	3.42e-06
489	VIT_204s0008g00480	148.757	-2.2383	0.273434	-8.1859	2.7e-16	8.98e-15
490	VIT_218s0041g01040	17.6144	-2.23923	0.837203	-2.67466	0.00748059	0.0246128
491	VIT_214s0066g01050	48.0431	-2.24194	0.491016	-4.56593	4.97e-06	3.84e-05
492	VIT_206s0009g02740	37.3894	-2.24315	0.580212	-3.8661	0.000110591	0.000626137
493	VIT_208s0040g01380	146.114	-2.24538	0.334743	-6.70776	1.98e-11	3.68e-10
494	VIT_202s0087g00090	39.8725	-2.24748	0.631199	-3.56065	0.000369935	0.00182151
495	VIT_206s0061g00040	315.884	-2.24915	0.290121	-7.75245	9.01e-15	2.54e-13
496	VIT_216s0022g02080	123.835	-2.25257	0.419093	-5.37486	7.66e-08	8.36e-07
497	VIT_212s0028g01370	12.3226	-2.25258	0.874549	-2.5757	0.0100037	0.0314864
498	VIT_200s1569g00010	1853.57	-2.25442	0.248841	-9.0597	1.31e-19	6.04e-18
499	VIT_205s0094g01200	32.1945	-2.26108	0.723483	-3.12527	0.0017764	0.00726088
500	VIT_206s0004g05810	33.4054	-2.26284	0.610223	-3.70822	0.000208725	0.0010977
501	VIT_200s0256g00100	40.7254	-2.26406	0.765065	-2.9593	0.00308339	0.0116636
502	VIT_210s0116g00910	21.7637	-2.26435	0.897849	-2.52198	0.0116698	0.0358434
503	VIT_215s0021g01920	9.38541	-2.2648	0.838682	-2.70043	0.00692498	0.0230833
504	VIT_207s0005g04395	107.437	-2.26483	0.428932	-5.28016	1.29e-07	1.36e-06
505	VIT_209s0002g07350	32.2677	-2.26812	0.672383	-3.37325	0.000742854	0.00338031
506	VIT_201s0146g00490	25.2268	-2.26865	0.514245	-4.41162	1.03e-05	7.42e-05
507	VIT_202s0033g01020	2118.48	-2.26879	0.235846	-9.6198	6.6e-22	3.72e-20
508	VIT_202s0033g01000	10459.7	-2.27215	0.179662	-12.6468	1.17e-36	1.68e-34
509	VIT_201s0127g00680	83.6665	-2.2835	0.570983	-3.99924	6.35e-05	0.000383213
510	VIT_214s0066g00470	96.412	-2.28402	0.350483	-6.51678	7.18e-11	1.22e-09
511	VIT_217s0000g09390	105.884	-2.28411	0.262422	-8.70396	3.21e-18	1.32e-16
512	VIT_200s0373g00010	30.7344	-2.28479	0.928825	-2.45987	0.0138987	0.0413774
513	VIT_206s0004g05240	62.8747	-2.28693	0.397671	-5.75081	8.88e-09	1.12e-07
514	VIT_205s0049g02090	98.8658	-2.28751	0.401817	-5.69292	1.25e-08	1.55e-07
515	VIT_203s0063g02620	19.1482	-2.28764	0.865681	-2.64259	0.00822754	0.0267062
516	VIT_217s0000g01790	114.156	-2.28768	0.381833	-5.9913	2.08e-09	2.91e-08
517	VIT_211s0016g02520	142.656	-2.28831	0.433287	-5.28128	1.28e-07	1.35e-06
518	VIT_214s0081g00360	91.0859	-2.28903	0.572449	-3.99867	6.37e-05	0.000383771
519	VIT_214s0060g00810	939.044	-2.28973	0.319673	-7.16272	7.91e-13	1.79e-11
520	VIT_208s0040g02320	11.0152	-2.29101	0.884509	-2.59015	0.00959339	0.0304157
521	VIT_207s0129g00330	1272.31	-2.29395	0.27866	-8.23207	1.84e-16	6.35e-15
522	VIT_207s0031g00040	34.6377	-2.29496	0.674499	-3.40246	0.000667816	0.00308148
523	VIT_204s0008g03770	1557.24	-2.30253	0.253943	-9.06711	1.22e-19	5.69e-18
524	VIT_200s0583g00030	20.6724	-2.30576	0.73895	-3.12032	0.00180652	0.00736978
525	VIT_214s0108g00570	80.5117	-2.31077	0.368922	-6.26357	3.76e-10	5.84e-09
526	VIT_213s0019g04750	16.83	-2.31131	0.943677	-2.44926	0.0143149	0.0423981
527	VIT_211s0016g03350	148.158	-2.32049	0.383315	-6.05375	1.42e-09	2.02e-08
528	VIT_209s0002g02240	78.3638	-2.32101	0.523028	-4.43764	9.09e-06	6.65e-05
529	VIT_201s0011g00590	27.8024	-2.32389	0.814524	-2.85306	0.00432998	0.0155381
530	VIT_205s0077g00500	86.527	-2.32435	0.656435	-3.54087	0.000398817	0.00195114
531	VIT_201s0011g01970	56.1882	-2.32935	0.434494	-5.36107	8.27e-08	8.95e-07
532	VIT_200s0181g00020	57.2458	-2.33089	0.560469	-4.15882	3.2e-05	0.000207889
533	VIT_205s0049g00210	487.125	-2.33296	0.266385	-8.75784	1.99e-18	8.22e-17
534	VIT_212s0034g01770	11.9452	-2.33795	0.917315	-2.54868	0.010813	0.0336561
535	VIT_214s0068g01440	84.7692	-2.3438	0.40399	-5.80164	6.57e-09	8.47e-08
536	VIT_208s0007g04860	5866.26	-2.34548	0.161945	-14.4832	1.55e-47	4.1e-45
537	VIT_204s0044g00890	127.493	-2.34814	0.288415	-8.14156	3.9e-16	1.29e-14
538	VIT_218s0122g01340	673.081	-2.35393	0.214753	-10.9611	5.88e-28	4.94e-26
539	VIT_206s0004g00240	12765.9	-2.35862	0.115619	-20.3999	1.67e-92	4.56e-89
540	VIT_205s0077g02180	33.3664	-2.35928	0.701748	-3.36201	0.000773777	0.00351181
541	VIT_212s0057g01440	60.9666	-2.35988	0.479542	-4.92111	8.61e-07	7.73e-06
542	VIT_214s0108g01150	52.2397	-2.36248	0.362441	-6.51824	7.11e-11	1.21e-09
543	VIT_206s0004g06220	996.633	-2.36335	0.162194	-14.5711	4.29e-48	1.19e-45
544	VIT_213s0084g00750	41.5691	-2.36369	0.653191	-3.61869	0.0002961	0.00149287
545	VIT_213s0067g02530	107.528	-2.37076	0.453381	-5.22907	1.7e-07	1.75e-06
546	VIT_216s0050g01260	66.1955	-2.37208	0.450602	-5.26424	1.41e-07	1.47e-06
547	VIT_208s0040g00670	1671.22	-2.37753	0.190521	-12.4791	9.7e-36	1.31e-33
548	VIT_207s0151g00280	1779.8	-2.38104	0.248486	-9.58219	9.5e-22	5.24e-20
549	VIT_218s0001g09040	230.795	-2.38392	0.241816	-9.8584	6.3e-23	3.79e-21
550	VIT_215s0046g03150	21.8777	-2.38419	0.859689	-2.77331	0.00554886	0.0191659
551	VIT_214s0083g00110	9850.66	-2.3888	0.25064	-9.53078	1.56e-21	8.49e-20
552	VIT_217s0000g00290	334.496	-2.38887	0.265732	-8.98977	2.48e-19	1.11e-17
553	VIT_215s0046g00420	126.63	-2.38969	0.31579	-7.56734	3.81e-14	1.01e-12
554	VIT_205s0049g00660	28.8841	-2.39172	0.897165	-2.66587	0.00767902	0.0251702
555	VIT_200s0317g00050	2914.5	-2.3954	0.195099	-12.2779	1.19e-34	1.51e-32
556	VIT_203s0038g03400	81.4128	-2.39658	0.854504	-2.80465	0.00503715	0.0176638
557	VIT_203s0038g00360	154.941	-2.39719	0.306087	-7.83172	4.81e-15	1.41e-13
558	VIT_216s0013g02090	11.9165	-2.39791	0.927806	-2.5845	0.00975206	0.0308437
559	VIT_207s0197g00010	116.813	-2.39824	0.388977	-6.1655	7.03e-10	1.05e-08
560	VIT_207s0151g00740	11.3346	-2.39946	0.965418	-2.48541	0.0129401	0.0389919
561	VIT_212s0057g01020	108.872	-2.40209	0.840702	-2.85725	0.00427336	0.0154015
562	VIT_203s0038g01830	57.7065	-2.40758	0.607853	-3.96079	7.47e-05	0.000441554
563	VIT_206s0009g02830	58.9886	-2.41151	0.603362	-3.99678	6.42e-05	0.000386713
564	VIT_209s0002g08590	24.7725	-2.4168	0.619804	-3.89929	9.65e-05	0.000555278
565	VIT_207s0141g00690	81.9242	-2.4176	0.633517	-3.81615	0.000135549	0.000753137
566	VIT_208s0007g00130	63777.9	-2.4177	0.183376	-13.1844	1.08e-39	1.82e-37
567	VIT_202s0087g00370	35.4606	-2.41852	0.636135	-3.8019	0.000143591	0.000790456
568	VIT_203s0063g00770	54.301	-2.42068	0.687694	-3.51999	0.000431561	0.00209096
569	VIT_217s0000g04750	29427.2	-2.42242	0.174321	-13.8964	6.67e-44	1.37e-41
570	VIT_205s0077g02260	47.9187	-2.42327	0.650185	-3.72704	0.000193738	0.0010314
571	VIT_201s0011g05970	526.039	-2.426	0.210057	-11.5493	7.44e-31	7.57e-29
572	VIT_211s0016g00650	2172.07	-2.42673	0.213602	-11.361	6.54e-30	6.09e-28
573	VIT_213s0019g02200	3021.57	-2.43316	0.214765	-11.3294	9.39e-30	8.57e-28
574	VIT_208s0007g03900	881.287	-2.43418	0.300882	-8.09015	5.96e-16	1.92e-14
575	VIT_206s0004g01450	7964.8	-2.43653	0.202788	-12.0151	2.96e-33	3.38e-31
576	VIT_204s0008g03890	144.66	-2.43705	0.282836	-8.61647	6.9e-18	2.76e-16
577	VIT_218s0041g00900	25.7062	-2.43791	0.983787	-2.47808	0.0132091	0.0396835
578	VIT_200s0194g00030	40925.9	-2.44113	0.180317	-13.538	9.33e-42	1.71e-39
579	VIT_204s0023g03370	204.44	-2.44561	0.483286	-5.06038	4.18e-07	3.99e-06
580	VIT_217s0000g09300	43.6977	-2.44595	0.427223	-5.72524	1.03e-08	1.29e-07
581	VIT_208s0007g08680	44.9693	-2.44786	0.601535	-4.06936	4.71e-05	0.000294431
582	VIT_210s0003g04560	86.8199	-2.44888	0.545796	-4.48681	7.23e-06	5.39e-05
583	VIT_206s0004g03420	12.1159	-2.45106	0.993674	-2.46666	0.013638	0.0407729
584	VIT_202s0025g02140	5536.21	-2.45399	0.213993	-11.4676	1.92e-30	1.88e-28
585	VIT_201s0137g00700	20.0093	-2.45481	0.942594	-2.60431	0.00920595	0.0293336
586	VIT_210s0003g00970	12.4457	-2.46143	0.9193	-2.6775	0.00741735	0.0244427
587	VIT_207s0005g06300	11.7789	-2.46625	1.03273	-2.3881	0.0169358	0.0488045
588	VIT_205s0049g01350	42.097	-2.46805	0.426988	-5.78013	7.46e-09	9.54e-08
589	VIT_210s0042g00960	249.886	-2.47121	0.266359	-9.27775	1.73e-20	8.67e-19
590	VIT_212s0059g00570	13.9702	-2.47504	0.841597	-2.94088	0.00327276	0.0122849
591	VIT_203s0088g00320	2491.57	-2.47802	0.244667	-10.1281	4.15e-24	2.74e-22
592	VIT_207s0289g00060	446.138	-2.48105	0.251753	-9.85511	6.51e-23	3.91e-21
593	VIT_218s0001g14420	157.7	-2.48128	0.351523	-7.05865	1.68e-12	3.63e-11
594	VIT_214s0006g02750	82.089	-2.48217	0.415131	-5.97923	2.24e-09	3.1e-08
595	VIT_213s0106g00500	191.695	-2.48279	0.24406	-10.1729	2.62e-24	1.75e-22
596	VIT_207s0141g00590	109.895	-2.48316	0.254168	-9.76979	1.52e-22	8.91e-21
597	VIT_205s0051g00050	74.2882	-2.49119	0.421719	-5.90722	3.48e-09	4.67e-08
598	VIT_200s0540g00050	18.3939	-2.4938	1.0158	-2.45501	0.014088	0.0418039
599	VIT_205s0051g00660	18.3674	-2.49757	0.879796	-2.83881	0.00452828	0.0161223
600	VIT_201s0011g02960	98.2634	-2.49757	0.783643	-3.18713	0.00143692	0.00602558
601	VIT_208s0040g01130	347.035	-2.49802	0.631961	-3.95281	7.72e-05	0.000454424
602	VIT_200s0391g00010	61.4742	-2.49902	0.37303	-6.69925	2.09e-11	3.89e-10
603	VIT_205s0049g01050	9.39376	-2.50907	0.890272	-2.81831	0.00482767	0.0170325
604	VIT_207s0031g02610	23572.7	-2.51202	0.229838	-10.9295	8.33e-28	6.91e-26
605	VIT_202s0025g05110	19.3487	-2.51357	0.902516	-2.78507	0.00535167	0.018606
606	VIT_205s0077g01770	182.31	-2.51906	0.258078	-9.76086	1.66e-22	9.7e-21
607	VIT_200s0194g00120	501.16	-2.52139	0.25879	-9.74302	1.98e-22	1.15e-20
608	VIT_218s0122g00300	3203.39	-2.52396	0.165309	-15.2681	1.25e-52	4.41e-50
609	VIT_218s0001g12880	64.9531	-2.5262	0.622545	-4.05786	4.95e-05	0.000307995
610	VIT_201s0010g03020	118.157	-2.53111	0.510183	-4.96117	7.01e-07	6.4e-06
611	VIT_207s0005g03190	24.2047	-2.53151	0.763587	-3.31529	0.000915487	0.00407168
612	VIT_211s0016g05430	1356.25	-2.53263	0.280258	-9.03676	1.61e-19	7.4e-18
613	VIT_217s0000g03830	13.4003	-2.53364	0.820089	-3.08946	0.00200518	0.00804317
614	VIT_208s0007g07270	15.4135	-2.53501	0.795769	-3.18561	0.00144451	0.00605343
615	VIT_213s0067g03470	731.715	-2.53819	0.177821	-14.2739	3.18e-46	7.41e-44
616	VIT_209s0054g01180	26.949	-2.54007	0.756492	-3.3577	0.000785939	0.00355686
617	VIT_210s0003g05770	17.085	-2.54775	0.904647	-2.81629	0.00485813	0.0171188
618	VIT_217s0000g07830	22.0571	-2.54846	0.649936	-3.92109	8.81e-05	0.000512297
619	VIT_208s0007g07140	35.1199	-2.54958	0.735003	-3.46881	0.000522776	0.00248556
620	VIT_218s0001g08250	815.673	-2.55109	0.293282	-8.69842	3.37e-18	1.38e-16
621	VIT_217s0000g05160	220.866	-2.55235	0.279392	-9.13538	6.52e-20	3.08e-18
622	VIT_212s0028g01140	433.975	-2.55455	0.162296	-15.74	8.04e-56	3.49e-53
623	VIT_200s0865g00030	137.968	-2.55648	0.358899	-7.12312	1.06e-12	2.36e-11
624	VIT_200s0337g00010	19.0498	-2.56021	0.830266	-3.08361	0.00204508	0.0081841
625	VIT_217s0000g01825	47.6097	-2.56388	0.793681	-3.23037	0.0012363	0.00529368
626	VIT_206s0004g06390	94.8702	-2.57753	0.409584	-6.29305	3.11e-10	4.87e-09
627	VIT_217s0000g06180	276.915	-2.57837	0.259959	-9.91835	3.46e-23	2.15e-21
628	VIT_218s0001g00450	22.3427	-2.58026	0.852469	-3.0268	0.00247154	0.00964551
629	VIT_208s0007g00100	61.3102	-2.58719	0.463605	-5.58059	2.4e-08	2.83e-07
630	VIT_200s1682g00020	129.526	-2.58732	0.418633	-6.1804	6.39e-10	9.66e-09
631	VIT_206s0009g01770	23.5978	-2.58795	0.968065	-2.67332	0.00751038	0.0246895
632	VIT_207s0005g00010	2283.53	-2.5889	0.204834	-12.639	1.29e-36	1.83e-34
633	VIT_200s0187g00260	46.6655	-2.59202	0.42233	-6.13743	8.39e-10	1.25e-08
634	VIT_200s0392g00030	18.4595	-2.5924	1.03697	-2.49997	0.0124205	0.0377241
635	VIT_211s0037g00620	13.2905	-2.59376	0.954761	-2.71666	0.00659434	0.0221436
636	VIT_219s0014g02100	26.7722	-2.59583	0.759315	-3.41865	0.000629317	0.00292577
637	VIT_200s0404g00100	80.9372	-2.5987	0.485642	-5.35105	8.74e-08	9.43e-07
638	VIT_208s0007g07550	50.1882	-2.59986	0.592367	-4.38894	1.14e-05	8.13e-05
639	VIT_211s0016g03370	9.28997	-2.60254	1.02074	-2.54967	0.0107826	0.0335779
640	VIT_214s0081g00420	90.59	-2.6059	0.647341	-4.02555	5.68e-05	0.000347394
641	VIT_215s0046g01390	110.371	-2.60813	0.432022	-6.03704	1.57e-09	2.23e-08
642	VIT_212s0057g00670	2476.04	-2.60832	0.134841	-19.3436	2.31e-83	3.38e-80
643	VIT_208s0040g01540	81.9736	-2.61919	0.474954	-5.51462	3.5e-08	4.02e-07
644	VIT_219s0014g01930	54.6742	-2.62108	0.453647	-5.77779	7.57e-09	9.65e-08
645	VIT_201s0010g01840	1929.01	-2.62574	0.19289	-13.6127	3.37e-42	6.43e-40
646	VIT_217s0000g05070	280.599	-2.62667	0.648419	-4.05088	5.1e-05	0.0003165
647	VIT_214s0171g00360	71.787	-2.63089	0.705138	-3.73103	0.000190695	0.00101675
648	VIT_212s0035g02060	14.1795	-2.63271	0.838567	-3.13954	0.00169216	0.00696419
649	VIT_219s0015g00300	14.5671	-2.63426	0.878979	-2.99696	0.00272687	0.0104833
650	VIT_212s0028g01720	266.658	-2.63534	0.344229	-7.65579	1.92e-14	5.21e-13
651	VIT_212s0142g00110	337.748	-2.63811	0.29608	-8.91011	5.1e-19	2.21e-17
652	VIT_206s0061g00270	11616	-2.63839	0.156546	-16.8538	9.84e-64	5.87e-61
653	VIT_206s0004g01220	731.899	-2.63956	0.191008	-13.8191	1.95e-43	3.85e-41
654	VIT_212s0028g01730	153.254	-2.64178	0.360561	-7.32688	2.36e-13	5.67e-12
655	VIT_206s0009g00580	16.5909	-2.64798	0.756253	-3.50145	0.000462728	0.00222838
656	VIT_200s0414g00040	15.0092	-2.64841	0.859239	-3.08228	0.00205424	0.00821697
657	VIT_211s0078g00260	1978.62	-2.65193	0.215016	-12.3336	5.97e-35	7.75e-33
658	VIT_214s0060g02340	337.329	-2.65754	0.294333	-9.02902	1.73e-19	7.89e-18
659	VIT_201s0011g03450	52.2075	-2.66094	0.595658	-4.46723	7.92e-06	5.87e-05
660	VIT_207s0005g00030	5853.06	-2.66319	0.188646	-14.1174	2.97e-45	6.43e-43
661	VIT_212s0034g00130	8766.21	-2.66917	0.207145	-12.8856	5.43e-38	8.29e-36
662	VIT_217s0000g04330	17.0139	-2.66999	0.915784	-2.91552	0.00355096	0.0131635
663	VIT_200s0572g00020	66.3633	-2.67348	0.996217	-2.68364	0.00728263	0.024095
664	VIT_216s0098g01805	37.9795	-2.69164	0.706229	-3.81129	0.000138243	0.000765652
665	VIT_218s0001g02300	11255.9	-2.69446	0.172145	-15.6523	3.21e-55	1.36e-52
666	VIT_215s0048g01750	18.2879	-2.69782	0.893834	-3.01825	0.00254238	0.00988962
667	VIT_217s0000g05840	104.852	-2.69806	0.42521	-6.34523	2.22e-10	3.55e-09
668	VIT_209s0002g06690	11.8016	-2.70304	0.987702	-2.7367	0.00620595	0.0210581
669	VIT_203s0038g03180	11.506	-2.70844	0.920342	-2.94286	0.00325198	0.0122189
670	VIT_214s0068g02200	119.563	-2.70971	0.300072	-9.03018	1.71e-19	7.82e-18
671	VIT_201s0011g04810	515.888	-2.71321	0.260373	-10.4205	2e-25	1.44e-23
672	VIT_202s0025g02200	48.9561	-2.71928	0.446422	-6.09129	1.12e-09	1.63e-08
673	VIT_219s0093g00320	29.8274	-2.72332	0.804038	-3.38706	0.00070646	0.00323244
674	VIT_207s0151g00640	37.258	-2.72587	0.574422	-4.74541	2.08e-06	1.73e-05
675	VIT_208s0105g00380	18.3608	-2.73119	1.06664	-2.56056	0.0104504	0.0326874
676	VIT_211s0065g01110	15.9813	-2.73876	0.933547	-2.93371	0.00334932	0.0125353
677	VIT_217s0000g01630	121.391	-2.74451	0.316992	-8.65797	4.8e-18	1.94e-16
678	VIT_218s0001g13230	46.9085	-2.74537	0.875708	-3.13503	0.00171836	0.00704627
679	VIT_203s0017g01300	2085.08	-2.7465	0.588064	-4.67041	3.01e-06	2.41e-05
680	VIT_202s0154g00080	22.9578	-2.74946	0.709933	-3.87284	0.000107573	0.000611408
681	VIT_215s0048g02620	31.9253	-2.75278	0.474896	-5.79659	6.77e-09	8.71e-08
682	VIT_206s0004g00960	109.239	-2.75382	0.590467	-4.6638	3.1e-06	2.48e-05
683	VIT_209s0002g00330	76.8799	-2.75861	0.518876	-5.31652	1.06e-07	1.13e-06
684	VIT_218s0001g09400	42.7343	-2.75991	0.742165	-3.71872	0.000200232	0.00105976
685	VIT_206s0004g07450	9.34418	-2.76538	0.919014	-3.00907	0.00262048	0.0101417
686	VIT_218s0001g02690	105.596	-2.7682	0.485084	-5.70663	1.15e-08	1.43e-07
687	VIT_207s0005g02130	4346.26	-2.76939	0.192043	-14.4206	3.84e-47	9.39e-45
688	VIT_205s0102g00460	24.4251	-2.77269	0.766898	-3.61547	0.000299807	0.00150892
689	VIT_214s0068g01520	22.5864	-2.77581	0.770991	-3.60031	0.000317839	0.00159003
690	VIT_208s0007g00740	5807.02	-2.78203	0.228174	-12.1926	3.4e-34	4.19e-32
691	VIT_215s0048g01895	43.5566	-2.78413	0.664961	-4.18691	2.83e-05	0.000185793
692	VIT_213s0084g00720	12.305	-2.78515	0.909479	-3.06235	0.00219605	0.00870754
693	VIT_215s0046g02380	117.545	-2.78906	0.420346	-6.63516	3.24e-11	5.82e-10
694	VIT_213s0019g00580	11.6509	-2.79047	0.921965	-3.02665	0.00247276	0.00964832
695	VIT_208s0007g03780	52.0395	-2.79727	0.66779	-4.18885	2.8e-05	0.000184339
696	VIT_204s0008g05050	48.7721	-2.79769	0.4028	-6.9456	3.77e-12	7.8e-11
697	VIT_206s0004g00810	111.719	-2.79884	0.408616	-6.84955	7.41e-12	1.46e-10
698	VIT_218s0041g02020	24245.4	-2.80123	0.275305	-10.175	2.56e-24	1.72e-22
699	VIT_208s0056g00610	19.3779	-2.80232	0.942579	-2.97303	0.00294874	0.011212
700	VIT_215s0048g01710	84.6279	-2.80481	0.422954	-6.63148	3.32e-11	5.95e-10
701	VIT_218s0001g02590	60.844	-2.80699	0.596228	-4.70791	2.5e-06	2.04e-05
702	VIT_206s0004g00490	82.1753	-2.80738	0.522834	-5.36955	7.89e-08	8.57e-07
703	VIT_212s0055g00180	903.643	-2.81065	0.300764	-9.34504	9.19e-21	4.71e-19
704	VIT_201s0011g00730	342.983	-2.81528	0.400144	-7.03567	1.98e-12	4.23e-11
705	VIT_205s0020g03530	11.6118	-2.81861	1.0391	-2.71254	0.00667691	0.0223501
706	VIT_200s1322g00010	16.2426	-2.82323	0.85017	-3.32079	0.000897642	0.0039979
707	VIT_213s0019g04220	134.833	-2.82844	0.334318	-8.46032	2.67e-17	1.01e-15
708	VIT_219s0090g01770	91.4142	-2.83085	0.320721	-8.82653	1.08e-18	4.55e-17
709	VIT_217s0000g00950	28.106	-2.83257	0.874784	-3.23802	0.00120364	0.00517239
710	VIT_212s0034g01230	22.2179	-2.83275	1.08225	-2.61747	0.00885855	0.0283926
711	VIT_208s0040g03050	117.219	-2.8382	0.890607	-3.18681	0.00143849	0.00602954
712	VIT_207s0129g00190	22.6615	-2.83874	0.678334	-4.18486	2.85e-05	0.000187216
713	VIT_200s0590g00010	72.2261	-2.84149	0.380724	-7.46337	8.43e-14	2.17e-12
714	VIT_214s0068g00740	12.5915	-2.84325	0.917105	-3.10024	0.00193363	0.00780321
715	VIT_212s0059g00080	14.2401	-2.84379	0.945785	-3.00681	0.00264008	0.0102013
716	VIT_216s0013g00890	3605.78	-2.84681	0.230257	-12.3636	4.11e-35	5.41e-33
717	VIT_210s0116g01040	30.8215	-2.8473	0.986135	-2.88733	0.00388523	0.0142175
718	VIT_218s0001g06820	24.7041	-2.84749	0.713698	-3.98977	6.61e-05	0.000396693
719	VIT_208s0217g00090	3153.82	-2.84793	0.189996	-14.9894	8.61e-51	2.78e-48
720	VIT_200s0958g00020	3769.22	-2.84892	0.203324	-14.0117	1.32e-44	2.77e-42
721	VIT_214s0060g02440	41.695	-2.85165	0.602742	-4.73114	2.23e-06	1.84e-05
722	VIT_213s0019g01070	350.525	-2.85328	0.197122	-14.4747	1.75e-47	4.52e-45
723	VIT_207s0005g05590	15.9517	-2.85844	0.775791	-3.68455	0.000229107	0.00119208
724	VIT_201s0011g01980	36.2547	-2.8586	0.512522	-5.57751	2.44e-08	2.88e-07
725	VIT_209s0002g04490	1423.47	-2.86213	0.407936	-7.01612	2.28e-12	4.84e-11
726	VIT_204s0023g02570	22.0848	-2.86548	0.888663	-3.22448	0.00126202	0.00538689
727	VIT_216s0050g00980	220.34	-2.86934	0.396815	-7.23091	4.8e-13	1.12e-11
728	VIT_205s0136g00260	582.424	-2.87008	0.794459	-3.61263	0.000303113	0.00152355
729	VIT_205s0062g00310	4590.23	-2.87358	0.227307	-12.6418	1.24e-36	1.78e-34
730	VIT_217s0000g00146	35.1518	-2.87649	0.615926	-4.67019	3.01e-06	2.41e-05
731	VIT_212s0028g03560	42.5548	-2.88202	0.642448	-4.48601	7.26e-06	5.41e-05
732	VIT_211s0016g05360	40.9499	-2.88406	0.589524	-4.89218	9.97e-07	8.9e-06
733	VIT_214s0066g01880	1373.86	-2.88476	0.31184	-9.25076	2.23e-20	1.1e-18
734	VIT_205s0020g04880	45.6354	-2.88494	0.47041	-6.13283	8.63e-10	1.28e-08
735	VIT_204s0008g02950	270.201	-2.88601	0.248801	-11.5997	4.14e-31	4.36e-29
736	VIT_212s0028g02710	13.3715	-2.88627	1.21139	-2.38261	0.0171904	0.0494021
737	VIT_201s0011g01910	18.7393	-2.89665	0.648329	-4.46786	7.9e-06	5.85e-05
738	VIT_214s0171g00170	491.582	-2.8999	0.193301	-15.002	7.12e-51	2.34e-48
739	VIT_208s0007g08780	17.7266	-2.90303	0.997067	-2.91157	0.00359621	0.0133053
740	VIT_207s0031g02250	12.5219	-2.9074	0.969121	-3.00003	0.0026995	0.0103953
741	VIT_206s0061g00510	10.7543	-2.91431	0.818549	-3.56034	0.00037038	0.00182324
742	VIT_209s0002g06490	5.82332	-2.91519	1.1496	-2.53582	0.0112183	0.03468
743	VIT_206s0004g05960	54.7869	-2.91603	0.572861	-5.09029	3.58e-07	3.46e-06
744	VIT_214s0066g01590	93.9535	-2.92096	0.426005	-6.85663	7.05e-12	1.4e-10
745	VIT_200s0769g00010	14000.5	-2.93021	0.174186	-16.8223	1.67e-63	9.4e-61
746	VIT_218s0041g00350	226.628	-2.93143	0.254254	-11.5295	9.36e-31	9.4e-29
747	VIT_211s0037g00530	53.7389	-2.93513	0.588529	-4.98724	6.12e-07	5.65e-06
748	VIT_213s0067g03860	15.8154	-2.93775	1.01696	-2.88876	0.00386765	0.0141613
749	VIT_201s0010g03040	44.6992	-2.94546	0.715791	-4.11498	3.87e-05	0.000246437
750	VIT_202s0012g00460	58.7803	-2.95225	0.613927	-4.8088	1.52e-06	1.3e-05
751	VIT_200s0459g00030	16.8936	-2.95576	1.07214	-2.75689	0.00583539	0.0200035
752	VIT_205s0051g00340	2253.84	-2.95637	0.189624	-15.5907	8.42e-55	3.35e-52
753	VIT_203s0063g00480	3200.33	-2.95693	0.209083	-14.1424	2.08e-45	4.56e-43
754	VIT_218s0001g06590	110.001	-2.9574	0.409024	-7.23038	4.82e-13	1.12e-11
755	VIT_216s0098g00330	2947.46	-2.96412	0.170742	-17.3602	1.65e-67	1.13e-64
756	VIT_207s0031g02480	24.9952	-2.96666	0.942277	-3.1484	0.00164168	0.00678435
757	VIT_218s0001g00320	25.4629	-2.96717	0.869439	-3.41274	0.000643126	0.00297981
758	VIT_211s0016g00660	2768.17	-2.97153	0.224522	-13.2349	5.52e-40	9.4e-38
759	VIT_214s0030g01210	25.6913	-2.97706	0.916611	-3.24789	0.00116263	0.00502103
760	VIT_202s0025g04460	1579.67	-2.99354	0.256094	-11.6892	1.45e-31	1.55e-29
761	VIT_208s0040g02590	8.47151	-2.99402	1.18075	-2.53569	0.0112225	0.0346873
762	VIT_214s0171g00440	9.36122	-2.99951	1.24023	-2.41852	0.0155839	0.0455207
763	VIT_214s0081g00600	11.2936	-3.00054	0.94822	-3.16439	0.00155407	0.00645726
764	VIT_204s0008g02450	46.9402	-3.00226	0.483238	-6.2128	5.2e-10	7.96e-09
765	VIT_207s0005g04110	42.0005	-3.00918	0.681729	-4.41404	1.01e-05	7.34e-05
766	VIT_218s0001g05930	122.415	-3.0144	0.343616	-8.7726	1.75e-18	7.27e-17
767	VIT_218s0001g08300	14.8761	-3.01529	0.914781	-3.29619	0.000980058	0.00432259
768	VIT_212s0028g01620	39.605	-3.02462	0.436359	-6.93151	4.16e-12	8.56e-11
769	VIT_210s0042g00220	29.8712	-3.02602	0.8838	-3.42387	0.000617355	0.00287366
770	VIT_200s0341g00070	9.60353	-3.02677	1.06952	-2.83001	0.00465461	0.0165258
771	VIT_201s0127g00300	223.931	-3.03291	0.264104	-11.4838	1.59e-30	1.57e-28
772	VIT_212s0055g00160	756.882	-3.03307	0.332699	-9.11656	7.75e-20	3.64e-18
773	VIT_206s0004g05870	120.702	-3.03748	0.410279	-7.40346	1.33e-13	3.33e-12
774	VIT_211s0016g00670	451.038	-3.04211	0.313792	-9.69468	3.18e-22	1.82e-20
775	VIT_211s0016g05770	5096.24	-3.04456	0.209247	-14.5501	5.83e-48	1.59e-45
776	VIT_219s0014g03160	574.772	-3.04772	0.283704	-10.7426	6.42e-27	4.96e-25
777	VIT_214s0060g01830	12.3546	-3.05214	1.1638	-2.62255	0.00872735	0.0280428
778	VIT_201s0011g04695	10.4915	-3.05702	0.843763	-3.62308	0.000291114	0.00147138
779	VIT_209s0002g00690	983.163	-3.06105	0.228323	-13.4066	5.53e-41	9.95e-39
780	VIT_217s0000g08960	245.768	-3.06108	0.430287	-7.11404	1.13e-12	2.51e-11
781	VIT_219s0015g00490	9.0096	-3.06456	1.28395	-2.38683	0.0169945	0.0489587
782	VIT_212s0059g01670	241.125	-3.07283	0.268619	-11.4394	2.66e-30	2.57e-28
783	VIT_210s0042g01260	34.298	-3.07492	0.788279	-3.90081	9.59e-05	0.000552476
784	VIT_203s0091g01290	177.879	-3.08026	1.00239	-3.07293	0.0021197	0.00843811
785	VIT_218s0089g01200	13.0269	-3.08055	0.863913	-3.56581	0.000362728	0.00178926
786	VIT_204s0023g01660	1627.69	-3.08502	0.202178	-15.259	1.44e-52	4.98e-50
787	VIT_212s0055g00290	694.553	-3.08764	0.250254	-12.3381	5.65e-35	7.38e-33
788	VIT_206s0004g06790	106.427	-3.09071	0.575222	-5.37307	7.74e-08	8.43e-07
789	VIT_210s0597g00040	27.2574	-3.09249	0.615599	-5.02354	5.07e-07	4.77e-06
790	VIT_202s0025g04060	1812.92	-3.09418	0.274707	-11.2636	1.99e-29	1.78e-27
791	VIT_204s0008g01940	7.37476	-3.09952	1.27209	-2.43654	0.0148283	0.0436656
792	VIT_206s0009g02020	330.749	-3.10046	0.245766	-12.6155	1.73e-36	2.42e-34
793	VIT_203s0038g01960	57.0982	-3.10897	0.491618	-6.32397	2.55e-10	4.03e-09
794	VIT_213s0019g03630	120.429	-3.11895	0.438334	-7.11546	1.12e-12	2.49e-11
795	VIT_202s0025g02590	1711.33	-3.12643	0.29093	-10.7463	6.17e-27	4.78e-25
796	VIT_200s2300g00010	1415.99	-3.13629	0.226652	-13.8375	1.51e-43	3.04e-41
797	VIT_202s0025g02650	12.8648	-3.14177	1.14011	-2.75568	0.00585705	0.0200597
798	VIT_201s0146g00360	45.8553	-3.14445	0.797664	-3.94207	8.08e-05	0.000473227
799	VIT_213s0101g00510	29.2158	-3.14672	0.656224	-4.79518	1.63e-06	1.38e-05
800	VIT_218s0001g07650	19.7744	-3.14937	1.13742	-2.76886	0.00562523	0.019391
801	VIT_201s0011g04620	318.482	-3.14972	0.561995	-5.60453	2.09e-08	2.49e-07
802	VIT_212s0028g03620	7.15028	-3.14999	1.30637	-2.41125	0.015898	0.0462469
803	VIT_206s0004g00170	232.588	-3.15088	0.28976	-10.8741	1.53e-27	1.25e-25
804	VIT_219s0090g01230	37.7798	-3.15241	0.64557	-4.88314	1.04e-06	9.28e-06
805	VIT_216s0050g02550	33.7792	-3.16188	0.521576	-6.06218	1.34e-09	1.92e-08
806	VIT_215s0024g01240	15.1683	-3.16983	0.912827	-3.47254	0.000515558	0.00245308
807	VIT_212s0059g00870	15.3794	-3.17331	1.17068	-2.71067	0.00671475	0.0224492
808	VIT_212s0035g01820	31.3233	-3.17415	0.97779	-3.24625	0.00116936	0.0050444
809	VIT_204s0023g01220	14.3946	-3.17856	1.02718	-3.09446	0.00197174	0.00793353
810	VIT_208s0007g05610	8.99051	-3.18079	0.994735	-3.19763	0.00138561	0.00583737
811	VIT_205s0051g00680	46.8525	-3.18434	0.670381	-4.75004	2.03e-06	1.69e-05
812	VIT_200s0918g00010	6.71365	-3.18502	1.17489	-2.71092	0.00670963	0.0224399
813	VIT_212s0055g00310	328.869	-3.19603	0.315545	-10.1286	4.12e-24	2.73e-22
814	VIT_207s0031g00530	6873.39	-3.19643	0.238453	-13.4048	5.66e-41	1.01e-38
815	VIT_206s0004g00955	31.0449	-3.21078	0.831337	-3.86219	0.000112373	0.000634342
816	VIT_200s0854g00045	15.8061	-3.21212	1.15376	-2.78405	0.00536846	0.0186542
817	VIT_201s0011g04990	180.989	-3.21319	0.436954	-7.35361	1.93e-13	4.72e-12
818	VIT_205s0062g00270	10924.2	-3.21493	0.241263	-13.3254	1.65e-40	2.86e-38
819	VIT_212s0059g01060	4339.52	-3.21634	0.225985	-14.2325	5.76e-46	1.31e-43
820	VIT_200s0225g00010	1817.61	-3.21752	0.16022	-20.0819	1.06e-89	2.54e-86
821	VIT_214s0108g00560	16.8347	-3.22154	1.22613	-2.6274	0.00860413	0.0277075
822	VIT_207s0129g00800	304.713	-3.22405	1.09321	-2.94916	0.00318642	0.0119938
823	VIT_205s0020g03190	3172.43	-3.23021	0.268425	-12.0339	2.36e-33	2.74e-31
824	VIT_206s0004g01510	10662.5	-3.23334	0.46148	-7.00647	2.44e-12	5.15e-11
825	VIT_200s0260g00070	140.767	-3.23644	0.474613	-6.81912	9.16e-12	1.79e-10
826	VIT_205s0020g04630	417.225	-3.24309	0.264471	-12.2626	1.44e-34	1.82e-32
827	VIT_200s0324g00080	24.6751	-3.2458	0.702273	-4.62185	3.8e-06	2.99e-05
828	VIT_200s0323g00050	14.8431	-3.25309	1.01215	-3.21402	0.00130889	0.00556204
829	VIT_200s0366g00015	13.8798	-3.25454	1.06662	-3.05127	0.00227874	0.00898129
830	VIT_206s0004g06130	742.387	-3.25596	0.264922	-12.2903	1.02e-34	1.31e-32
831	VIT_218s0122g00330	45.9846	-3.25942	0.858026	-3.79874	0.000145433	0.000799903
832	VIT_207s0031g00710	306.628	-3.26664	0.539652	-6.05323	1.42e-09	2.03e-08
833	VIT_216s0022g02370	52.1319	-3.27335	0.516986	-6.33161	2.43e-10	3.85e-09
834	VIT_219s0014g00970	15.0181	-3.30446	1.07083	-3.08589	0.00202941	0.00812957
835	VIT_200s0266g00035	48.5299	-3.30654	1.18128	-2.79911	0.00512431	0.0179332
836	VIT_202s0025g02460	44.1573	-3.30687	0.660104	-5.00962	5.45e-07	5.1e-06
837	VIT_202s0025g02190	8.18701	-3.30853	1.21792	-2.71654	0.00659688	0.0221443
838	VIT_219s0090g00660	63.5326	-3.31596	0.654327	-5.06773	4.03e-07	3.86e-06
839	VIT_213s0084g00240	10.3805	-3.32292	1.16198	-2.8597	0.00424042	0.0153031
840	VIT_212s0035g01463	11.1343	-3.32481	1.25572	-2.64772	0.00810361	0.0263851
841	VIT_219s0015g01230	5.08688	-3.32721	1.31469	-2.53079	0.0113806	0.0350794
842	VIT_217s0000g02230	2634.61	-3.33423	0.226843	-14.6984	6.6e-49	1.97e-46
843	VIT_216s0022g00700	14.3228	-3.33545	0.983451	-3.39158	0.000694909	0.00319073
844	VIT_218s0122g01300	334.473	-3.34593	0.396058	-8.44808	2.96e-17	1.11e-15
845	VIT_212s0035g00330	32.604	-3.35279	0.647136	-5.18097	2.21e-07	2.22e-06
846	VIT_214s0066g00250	21.1353	-3.35306	0.924893	-3.62535	0.000288574	0.00146009
847	VIT_208s0007g06710	4364.53	-3.36177	0.176835	-19.0107	1.39e-80	1.56e-77
848	VIT_204s0044g01370	13.5994	-3.36252	1.2383	-2.71543	0.00661889	0.0221909
849	VIT_215s0024g01760	6.18854	-3.3668	1.17438	-2.86688	0.00414539	0.0150312
850	VIT_207s0129g00560	22.4945	-3.37979	1.09972	-3.07331	0.00211698	0.0084308
851	VIT_204s0044g00560	10.0745	-3.38048	1.24749	-2.70983	0.00673172	0.0224901
852	VIT_219s0014g02970	31.9855	-3.38109	0.625728	-5.40344	6.54e-08	7.21e-07
853	VIT_201s0127g00410	405.461	-3.38269	0.214298	-15.785	3.95e-56	1.84e-53
854	VIT_212s0059g02670	314.157	-3.38647	0.271643	-12.4666	1.14e-35	1.53e-33
855	VIT_217s0000g07570	15.4542	-3.39924	0.869103	-3.91121	9.18e-05	0.000531787
856	VIT_207s0031g00610	151.234	-3.40173	0.280876	-12.1112	9.22e-34	1.11e-31
857	VIT_201s0011g05020	28.0609	-3.40279	0.742643	-4.582	4.61e-06	3.57e-05
858	VIT_208s0007g05360	38.6537	-3.41098	0.616755	-5.53052	3.19e-08	3.69e-07
859	VIT_206s0004g04470	82503.4	-3.42594	0.219434	-15.6126	5.97e-55	2.42e-52
860	VIT_203s0038g03600	12.7608	-3.42939	1.20458	-2.84697	0.0044138	0.0157913
861	VIT_219s0014g00930	15.1239	-3.4302	0.79607	-4.30891	1.64e-05	0.000112679
862	VIT_204s0023g01110	8.08171	-3.43165	1.12121	-3.06067	0.00220839	0.00874419
863	VIT_213s0019g03355	9.36544	-3.44246	1.12289	-3.06572	0.00217144	0.00862071
864	VIT_200s0271g00030	615.442	-3.45089	0.858721	-4.01864	5.85e-05	0.000356213
865	VIT_215s0046g03020	123.378	-3.45125	0.526896	-6.55015	5.75e-11	9.92e-10
866	VIT_216s0022g00890	41.1549	-3.45287	0.689609	-5.00699	5.53e-07	5.15e-06
867	VIT_206s0061g00250	10.1162	-3.46076	1.29191	-2.6788	0.00738872	0.024382
868	VIT_205s0062g00300	17371	-3.46108	0.168679	-20.5187	1.47e-93	4.66e-90
869	VIT_215s0021g01660	40.3372	-3.4614	0.782441	-4.42385	9.7e-06	7.05e-05
870	VIT_207s0005g03290	16.6918	-3.46193	0.888957	-3.89437	9.85e-05	0.000565471
871	VIT_214s0060g00230	1801.51	-3.46197	0.306803	-11.284	1.57e-29	1.42e-27
872	VIT_200s0229g00210	7.55942	-3.46207	1.31246	-2.63784	0.00834351	0.0269955
873	VIT_207s0151g00680	11.561	-3.46481	1.27526	-2.71695	0.00658865	0.0221323
874	VIT_205s0077g01050	14.702	-3.46722	0.949945	-3.64991	0.000262328	0.00134707
875	VIT_216s0013g01375	6.93136	-3.47446	1.39245	-2.49522	0.0125878	0.0381171
876	VIT_217s0000g09790	115.52	-3.48207	0.393133	-8.85724	8.2e-19	3.51e-17
877	VIT_203s0091g00310	523.527	-3.48893	0.462637	-7.54138	4.65e-14	1.22e-12
878	VIT_201s0011g03090	1067.54	-3.49274	0.70967	-4.92165	8.58e-07	7.72e-06
879	VIT_203s0088g00260	171.776	-3.4929	1.23522	-2.82775	0.0046877	0.016631
880	VIT_205s0094g01330	36.484	-3.49831	0.585284	-5.97711	2.27e-09	3.14e-08
881	VIT_218s0001g08460	18.4325	-3.50074	1.40491	-2.49179	0.0127101	0.0384324
882	VIT_210s0116g00590	19.7703	-3.50436	0.864638	-4.05298	5.06e-05	0.000313771
883	VIT_200s0455g00010	7.57381	-3.50973	1.31074	-2.67766	0.00741383	0.0244427
884	VIT_204s0008g02600	24.378	-3.52081	0.732786	-4.80469	1.55e-06	1.32e-05
885	VIT_214s0081g00400	59.5488	-3.53535	0.572817	-6.17187	6.75e-10	1.02e-08
886	VIT_214s0108g01530	12.9283	-3.53614	0.889237	-3.9766	6.99e-05	0.000416488
887	VIT_208s0040g02730	2593.4	-3.53817	0.485335	-7.29016	3.1e-13	7.35e-12
888	VIT_203s0038g01460	33.4101	-3.5421	0.804871	-4.40082	1.08e-05	7.75e-05
889	VIT_218s0001g12040	10.2191	-3.55425	1.3704	-2.59358	0.0094982	0.0301691
890	VIT_214s0060g00760	62.8315	-3.5625	0.754726	-4.72026	2.36e-06	1.93e-05
891	VIT_219s0093g00110	1011.86	-3.57146	0.425231	-8.39887	4.51e-17	1.65e-15
892	VIT_213s0019g02530	14.2897	-3.57695	1.26116	-2.83624	0.00456487	0.0162405
893	VIT_208s0007g04830	7.14347	-3.58112	1.48509	-2.41139	0.0158918	0.0462359
894	VIT_214s0081g00390	13.7257	-3.59367	1.03237	-3.481	0.000499546	0.00238283
895	VIT_215s0024g00740	10.2843	-3.60479	0.987855	-3.64911	0.000263148	0.0013497
896	VIT_208s0007g05200	8.15339	-3.60809	1.36268	-2.64779	0.00810208	0.0263846
897	VIT_217s0000g01050	13.0557	-3.61295	0.94033	-3.84221	0.000121931	0.000683643
898	VIT_211s0206g00110	25.9019	-3.61857	0.712433	-5.07918	3.79e-07	3.65e-06
899	VIT_201s0011g05210	328.597	-3.62939	0.336489	-10.7861	4.01e-27	3.16e-25
900	VIT_215s0046g00170	127.495	-3.65765	0.73032	-5.00829	5.49e-07	5.13e-06
901	VIT_200s0527g00030	4.73383	-3.66794	1.39648	-2.62656	0.00862523	0.0277661
902	VIT_215s0048g02900	7.88606	-3.67056	1.33996	-2.7393	0.00615707	0.0209182
903	VIT_208s0007g01810	26.2678	-3.67367	0.796163	-4.61421	3.95e-06	3.09e-05
904	VIT_208s0056g00820	25.0686	-3.67489	0.763036	-4.81614	1.46e-06	1.26e-05
905	VIT_218s0041g01230	7181.56	-3.67866	0.240398	-15.3024	7.37e-53	2.7e-50
906	VIT_210s0116g00050	8.047	-3.69021	1.294	-2.85179	0.00434742	0.015586
907	VIT_214s0083g00080	17.0405	-3.69547	1.00818	-3.6655	0.000246859	0.00127713
908	VIT_219s0093g00150	577.076	-3.69942	0.360207	-10.2703	9.59e-25	6.7e-23
909	VIT_203s0091g00670	7.02079	-3.70313	1.50547	-2.45978	0.0139023	0.0413816
910	VIT_206s0004g02100	30.9129	-3.70369	0.736857	-5.02634	5e-07	4.71e-06
911	VIT_207s0005g00580	75.121	-3.70403	0.543927	-6.80979	9.77e-12	1.9e-10
912	VIT_215s0021g00125	5.33801	-3.70985	1.49326	-2.4844	0.0129771	0.0390725
913	VIT_212s0059g02010	14.6428	-3.71174	1.25336	-2.96143	0.00306215	0.0115924
914	VIT_208s0007g06250	12.3445	-3.71229	1.39457	-2.66196	0.0077687	0.0254248
915	VIT_209s0018g01900	31.8173	-3.71886	0.700668	-5.30759	1.11e-07	1.18e-06
916	VIT_218s0089g01150	54.4496	-3.72008	1.21157	-3.07046	0.00213726	0.0085027
917	VIT_207s0005g00730	52.1455	-3.73394	1.13679	-3.28462	0.00102118	0.00448841
918	VIT_201s0026g02740	16.552	-3.74556	0.767509	-4.88015	1.06e-06	9.39e-06
919	VIT_203s0038g03550	4.22826	-3.7526	1.51841	-2.4714	0.0134586	0.0403059
920	VIT_200s0615g00010	77.5253	-3.76135	0.826943	-4.5485	5.4e-06	4.13e-05
921	VIT_210s0003g01560	32.0581	-3.77226	0.636181	-5.92955	3.04e-09	4.11e-08
922	VIT_211s0037g00290	207.434	-3.77554	0.91116	-4.14366	3.42e-05	0.000220844
923	VIT_207s0031g00750	12.2675	-3.77603	1.40302	-2.69136	0.00711609	0.0236048
924	VIT_201s0010g03010	21.6301	-3.77691	0.862458	-4.37924	1.19e-05	8.47e-05
925	VIT_200s0361g00060	42.4328	-3.78454	0.84229	-4.49315	7.02e-06	5.26e-05
926	VIT_207s0104g01000	18.148	-3.78458	1.07096	-3.5338	0.000409628	0.00199737
927	VIT_206s0004g00440	7.25686	-3.78594	1.23193	-3.07319	0.00211785	0.0084325
928	VIT_206s0061g00960	7.73373	-3.78721	1.57131	-2.41023	0.0159425	0.0463553
929	VIT_212s0055g00250	507.414	-3.7928	0.486589	-7.79467	6.46e-15	1.87e-13
930	VIT_200s0271g00060	4230.52	-3.8006	0.670488	-5.66841	1.44e-08	1.76e-07
931	VIT_206s0004g04440	61.0566	-3.80148	1.25617	-3.02625	0.00247603	0.00965911
932	VIT_201s0010g03910	4.48591	-3.80301	1.53406	-2.47905	0.0131735	0.0396013
933	VIT_208s0007g02920	48.0883	-3.81371	1.34538	-2.83467	0.00458732	0.0163143
934	VIT_206s0004g06930	4.73597	-3.81495	1.5503	-2.46078	0.0138635	0.0413081
935	VIT_215s0048g01800	4.60389	-3.83855	1.51768	-2.52922	0.0114315	0.035225
936	VIT_206s0004g05770	137.845	-3.83891	0.457962	-8.3826	5.18e-17	1.89e-15
937	VIT_208s0056g00210	21.4116	-3.84223	0.963189	-3.98908	6.63e-05	0.000397737
938	VIT_214s0108g00600	115.534	-3.85218	0.440766	-8.73975	2.34e-18	9.63e-17
939	VIT_201s0026g02540	1570.83	-3.85241	0.269542	-14.2924	2.44e-46	5.89e-44
940	VIT_212s0034g00140	3175.73	-3.86608	0.226426	-17.0744	2.3e-65	1.46e-62
941	VIT_212s0059g00770	9.92003	-3.86696	0.989942	-3.90625	9.37e-05	0.000541468
[truncated: 476 more rows]

## Sheet: R3-R2
	GENE ID	base Mean	log2FoldChange	lfcSE	Stat	P value	P adj
1	VIT_200s0642g00010	59.5965	20.7145	5.88974	3.51706	0.00043636	0.00523303
2	VIT_200s1871g00010	15.4439	18.6473	5.89249	3.16458	0.00155307	0.0156703
3	VIT_200s2038g00010	17.5685	7.34603	1.30311	5.63732	1.73e-08	4.83e-07
4	VIT_205s0049g02350	10.0239	7.19658	1.41924	5.07071	3.96e-07	8.95e-06
5	VIT_212s0059g00030	12.0557	7.17745	1.72004	4.17284	3.01e-05	0.000480722
6	VIT_201s0127g00400	7.08511	6.85484	1.72477	3.97435	7.06e-05	0.00104138
7	VIT_200s0327g00020	3.46751	6.62677	2.08343	3.1807	0.00146922	0.0149341
8	VIT_216s0039g02500	14.4848	6.43946	1.42206	4.52826	5.95e-06	0.000109423
9	VIT_207s0141g00300	3.7309	6.36867	2.07826	3.06443	0.00218085	0.0206607
10	VIT_203s0038g02960	7.88745	6.23775	1.70201	3.66493	0.000247403	0.00318089
11	VIT_213s0067g02400	4.13916	6.21687	1.5942	3.89968	9.63e-05	0.00138178
12	VIT_217s0000g09400	11.7727	6.20798	1.53444	4.04577	5.22e-05	0.000795387
13	VIT_207s0005g05680	15.9201	6.15315	1.51917	4.05032	5.11e-05	0.000782347
14	VIT_203s0110g00190	3.04564	6.1407	2.0738	2.96108	0.00306559	0.0272942
15	VIT_212s0059g01090	22.9585	6.12552	1.26339	4.84848	1.24e-06	2.62e-05
16	VIT_201s0182g00160	4.08095	6.08983	1.73299	3.51406	0.000441317	0.00528583
17	VIT_213s0067g03750	40.0449	6.0155	1.40917	4.26882	1.97e-05	0.000326602
18	VIT_202s0025g01950	3.97602	6.00149	1.90271	3.15418	0.00160948	0.0161403
19	VIT_201s0026g01420	6.25811	5.97505	1.45692	4.10117	4.11e-05	0.000640265
20	VIT_214s0060g01520	4.28562	5.93608	1.64773	3.60257	0.000315083	0.00392159
21	VIT_206s0004g08430	12.5219	5.92269	1.49878	3.95168	7.76e-05	0.0011329
22	VIT_212s0134g00090	3.23424	5.86889	2.03797	2.87977	0.00397968	0.0336728
23	VIT_210s0003g02990	3.64414	5.83841	1.79937	3.24469	0.00117577	0.0123395
24	VIT_205s0020g03340	13.5284	5.82613	1.5275	3.81417	0.000136639	0.00187155
25	VIT_203s0091g00530	2.93074	5.79932	1.99074	2.91314	0.00357808	0.0309294
26	VIT_207s0005g03300	13.0248	5.77201	1.48622	3.88369	0.000102884	0.00146604
27	VIT_212s0121g00240	5.55991	5.73129	1.59043	3.60362	0.000313819	0.0039084
28	VIT_216s0050g02160	5.47082	5.66754	1.73312	3.27014	0.00107494	0.0113691
29	VIT_200s0396g00020	5.67514	5.64318	1.6779	3.36325	0.000770316	0.00856505
30	VIT_208s0007g04380	8.26487	5.62119	1.53511	3.66175	0.000250496	0.00321417
31	VIT_200s0259g00170	8.11269	5.57253	1.57251	3.54371	0.000394542	0.00479482
32	VIT_209s0018g01175	2.88167	5.56942	2.03671	2.73451	0.00624724	0.0478088
33	VIT_209s0002g01400	6.93649	5.50932	1.8448	2.9864	0.00282282	0.0255137
34	VIT_208s0007g01300	4.45134	5.50103	1.83229	3.00227	0.00267975	0.0244523
35	VIT_216s0022g00060	4.74366	5.49111	1.89408	2.8991	0.00374239	0.0320344
36	VIT_218s0076g00200	4.48221	5.42549	1.74071	3.11683	0.0018281	0.0179424
37	VIT_212s0035g00250	6.78133	5.40422	1.61388	3.34858	0.000812261	0.00896353
38	VIT_219s0014g04690	6.50496	5.38038	1.51132	3.56005	0.000370778	0.0045349
39	VIT_200s0375g00030	6.93654	5.37581	1.70797	3.14748	0.00164682	0.0164385
40	VIT_211s0016g04930	7.67119	5.35157	1.55938	3.43185	0.000599477	0.00688623
41	VIT_210s0003g03490	3.46065	5.31212	1.91105	2.77969	0.0054411	0.0428284
42	VIT_219s0014g03820	3.25279	5.27399	1.93288	2.72857	0.00636105	0.04847
43	VIT_209s0002g01820	7.87696	5.26381	1.51509	3.47425	0.000512278	0.00602606
44	VIT_212s0034g01980	87.5042	5.25674	1.3212	3.97876	6.93e-05	0.00102784
45	VIT_205s0029g00355	4.2901	5.16851	1.87982	2.74947	0.00596916	0.0461473
46	VIT_219s0027g00620	6.60257	5.15948	1.53796	3.35476	0.000794342	0.00879121
47	VIT_204s0008g07370	6.03882	5.15395	1.75213	2.94154	0.00326589	0.0286893
48	VIT_203s0063g01940	8.62916	5.13218	1.54825	3.31483	0.000916983	0.00990716
49	VIT_200s0372g00070	28.1024	5.1058	1.37224	3.72077	0.000198615	0.00261349
50	VIT_212s0028g03190	7.76156	5.0823	1.4257	3.56478	0.000364155	0.00445961
51	VIT_215s0048g01605	5.89244	5.07875	1.73394	2.92902	0.00340029	0.0296676
52	VIT_219s0014g00480	3.58084	5.06491	1.77728	2.8498	0.00437467	0.0361974
53	VIT_200s0304g00060	19.4446	5.03768	1.34273	3.75181	0.000175561	0.00234573
54	VIT_214s0128g00430	3.02649	5.03336	1.73852	2.8952	0.00378917	0.0323768
55	VIT_208s0040g01390	6.03347	5.00928	1.72411	2.90543	0.00366748	0.0315489
56	VIT_201s0011g05480	5.95851	4.94012	1.64732	2.99889	0.00270969	0.0246744
57	VIT_207s0005g01430	4.89829	4.93033	1.74593	2.82389	0.00474442	0.0385535
58	VIT_208s0056g01530	27.3439	4.78869	1.45651	3.28778	0.0010098	0.0107817
59	VIT_218s0001g02060	6.31928	4.78614	1.5965	2.9979	0.00271843	0.0247342
60	VIT_212s0028g03030	7.71073	4.77369	1.48699	3.2103	0.00132594	0.0136751
61	VIT_217s0000g07470	14.203	4.77257	1.5636	3.0523	0.00227098	0.0214019
62	VIT_200s0945g00010	10.4094	4.74104	1.43259	3.30941	0.000934938	0.010084
63	VIT_202s0025g04600	7.67902	4.64446	1.67192	2.77792	0.00547073	0.0430262
64	VIT_215s0021g00125	5.33801	4.49333	1.4865	3.02276	0.00250482	0.0231662
65	VIT_207s0005g01480	16.8373	4.47606	1.18142	3.78872	0.000151428	0.00205576
66	VIT_208s0058g00110	4.83287	4.47247	1.56088	2.86535	0.00416553	0.0349253
67	VIT_203s0038g03980	13.7101	4.46229	1.54089	2.89591	0.00378055	0.0323321
68	VIT_204s0023g02260	11.0482	4.44448	1.62931	2.72783	0.00637517	0.0485195
69	VIT_213s0067g03230	5.85493	4.4237	1.59012	2.78199	0.00540263	0.0426136
70	VIT_216s0039g00880	8.34252	4.40783	1.34694	3.27248	0.00106607	0.0113067
71	VIT_206s0004g03870	4.57554	4.3805	1.57742	2.77699	0.0054864	0.0431289
72	VIT_213s0074g00730	13.4832	4.37991	1.54213	2.84017	0.00450897	0.0370505
73	VIT_214s0066g02510	6.09898	4.27706	1.40281	3.04892	0.00229665	0.0215736
74	VIT_218s0001g11310	25.9081	4.26944	1.55235	2.7503	0.00595402	0.0460664
75	VIT_214s0128g00270	7.62361	4.24643	1.48802	2.85374	0.00432081	0.0358908
76	VIT_211s0149g00210	45.8143	4.21091	1.3305	3.16491	0.00155128	0.0156606
77	VIT_203s0091g00670	7.02079	4.19377	1.50228	2.79161	0.00524461	0.041712
78	VIT_208s0007g08780	17.7266	4.14423	0.989924	4.18641	2.83e-05	0.000456309
79	VIT_206s0061g00730	25.9195	4.1428	1.40583	2.94686	0.0032102	0.0283174
80	VIT_200s0854g00045	15.8061	4.11199	1.1465	3.58655	0.000335084	0.00415156
81	VIT_200s0455g00010	7.57381	4.04986	1.30565	3.1018	0.00192346	0.0186862
82	VIT_208s0007g05200	8.15339	4.01871	1.36019	2.95453	0.0031315	0.0277773
83	VIT_216s0050g00070	14.346	4.01332	1.46729	2.73519	0.0062344	0.0477529
84	VIT_204s0044g01800	7.67314	3.96871	1.37954	2.87685	0.00401672	0.0338661
85	VIT_208s0007g02950	8.16402	3.96783	1.38692	2.86088	0.00422465	0.0352586
86	VIT_217s0000g00200	11.3795	3.91823	1.26839	3.08914	0.00200737	0.0193504
87	VIT_209s0018g01490	64.7609	3.90978	1.37597	2.84147	0.00449065	0.0369477
88	VIT_208s0007g03660	24.4528	3.86039	0.903067	4.27476	1.91e-05	0.000318668
89	VIT_209s0002g06790	118.617	3.85714	1.29723	2.97336	0.00294555	0.0264312
90	VIT_200s0572g00010	355.068	3.75609	0.917598	4.09339	4.25e-05	0.000661049
91	VIT_208s0007g02440	12.8582	3.73361	1.12226	3.32686	0.000878296	0.00957047
92	VIT_206s0061g01360	6.14829	3.64315	1.26154	2.88786	0.00387871	0.0330236
93	VIT_200s0266g00010	112.965	3.61148	1.17467	3.07446	0.00210881	0.020118
94	VIT_202s0025g05110	19.3487	3.53932	0.897822	3.94212	8.08e-05	0.00117545
95	VIT_215s0021g00360	16.9161	3.53059	1.0804	3.26786	0.00108363	0.0114422
96	VIT_214s0219g00090	16.4117	3.52774	1.25087	2.82022	0.00479902	0.0388482
97	VIT_210s0003g03030	30.8017	3.49108	1.23404	2.82897	0.00466977	0.0381395
98	VIT_214s0030g01210	25.6913	3.41897	0.914325	3.73934	0.000184504	0.00245491
99	VIT_219s0027g01780	10.3179	3.40696	1.16118	2.93403	0.00334587	0.029284
100	VIT_208s0007g00410	12.3096	3.38087	1.02851	3.28715	0.00101207	0.0107879
101	VIT_205s0020g01110	25.8744	3.35486	0.994925	3.37198	0.000746311	0.00833213
102	VIT_206s0004g08080	16.6547	3.34513	1.10964	3.0146	0.0025732	0.0236838
103	VIT_202s0087g00370	35.4606	3.28707	0.633213	5.19109	2.09e-07	5.01e-06
104	VIT_212s0035g00260	9.20632	3.25375	1.15294	2.82212	0.00477071	0.0386683
105	VIT_215s0048g00950	8.92961	3.24618	1.07677	3.01475	0.0025719	0.0236833
106	VIT_204s0008g02600	24.378	3.17466	0.738291	4.30001	1.71e-05	0.000287619
107	VIT_205s0077g02180	33.3664	3.17279	0.69839	4.54301	5.55e-06	0.000102334
108	VIT_204s0008g02120	158.662	3.12541	0.610322	5.12092	3.04e-07	7.01e-06
109	VIT_217s0000g01050	13.0557	3.07053	0.947222	3.24162	0.00118853	0.0124389
110	VIT_201s0113g00470	7.88805	3.07009	1.1231	2.73358	0.00626503	0.0479105
111	VIT_212s0059g00080	14.2401	3.05535	0.946328	3.22864	0.00124382	0.0129038
112	VIT_215s0024g00740	10.2843	3.04654	0.999073	3.04937	0.00229321	0.0215645
113	VIT_206s0061g00510	10.7543	3.04631	0.820698	3.71185	0.000205746	0.00269618
114	VIT_218s0001g08610	34.3586	3.0095	0.871459	3.45341	0.000553556	0.00644801
115	VIT_218s0122g00290	31.7652	3.00307	0.769743	3.9014	9.56e-05	0.00137615
116	VIT_200s0323g00050	14.8431	2.97864	1.02252	2.91304	0.00357926	0.0309294
117	VIT_209s0002g08590	24.7725	2.83437	0.61877	4.58065	4.64e-06	8.71e-05
118	VIT_211s0052g01650	272.078	2.78177	0.774862	3.59001	0.000330659	0.00410207
119	VIT_200s0385g00025	86.6808	2.74309	1.00216	2.73717	0.00619702	0.0474856
120	VIT_209s0002g06690	11.8016	2.69508	0.990549	2.7208	0.00651246	0.0492695
121	VIT_207s0005g01210	115.947	2.64109	0.722397	3.65601	0.000256172	0.00327598
122	VIT_207s0005g03290	16.6918	2.64072	0.90377	2.9219	0.00347907	0.0302143
123	VIT_201s0010g02070	9.9423	2.63208	0.887739	2.96492	0.00302757	0.0270567
124	VIT_201s0011g05810	71.538	2.62498	0.591629	4.43687	9.13e-06	0.000161377
125	VIT_219s0014g01910	17.6765	2.55909	0.69668	3.67326	0.000239477	0.00309568
126	VIT_218s0001g06820	24.7041	2.49988	0.718016	3.48166	0.000498325	0.00589463
127	VIT_218s0075g00250	65.4136	2.45877	0.578959	4.24688	2.17e-05	0.000357776
128	VIT_219s0014g03710	22.3602	2.45292	0.695449	3.5271	0.000420142	0.00505442
129	VIT_210s0116g00590	19.7703	2.43839	0.874157	2.78942	0.0052802	0.0418903
130	VIT_218s0041g01040	17.6144	2.43316	0.837921	2.9038	0.00368663	0.0316708
131	VIT_200s0274g00050	24.2235	2.42531	0.82383	2.94394	0.00324059	0.0285328
132	VIT_208s0007g01810	26.2678	2.42021	0.809237	2.99073	0.00278309	0.0252503
133	VIT_205s0020g04880	45.6354	2.33416	0.475639	4.90742	9.23e-07	1.97e-05
134	VIT_200s0323g00060	81.4399	2.33161	0.582657	4.00168	6.29e-05	0.000942655
135	VIT_202s0025g02460	44.1573	2.30045	0.668693	3.44021	0.000581261	0.00670524
136	VIT_211s0016g00790	18.0612	2.28675	0.725004	3.15412	0.0016098	0.0161403
137	VIT_204s0023g01930	14.7747	2.28288	0.764921	2.98447	0.00284073	0.0256512
138	VIT_206s0061g00590	19.8176	2.28181	0.740094	3.08314	0.00204831	0.0196676
139	VIT_206s0004g00820	20.9275	2.26445	0.813514	2.78354	0.00537693	0.0424635
140	VIT_204s0044g00970	14.2543	2.24271	0.80931	2.77114	0.00558603	0.0437707
141	VIT_216s0022g00890	41.1549	2.16926	0.695499	3.119	0.00181467	0.0178474
142	VIT_212s0059g01320	125.836	2.14817	0.568248	3.78034	0.000156613	0.00212229
143	VIT_202s0025g00290	106.933	2.12508	0.534087	3.97891	6.92e-05	0.00102784
144	VIT_202s0025g02570	2467.54	2.10135	0.29521	7.11815	1.09e-12	5.37e-11
145	VIT_200s0194g00190	49.4571	2.09503	0.603418	3.47194	0.000516711	0.00606699
146	VIT_210s0003g01310	17.0012	2.09021	0.691622	3.02218	0.00250957	0.0231989
147	VIT_206s0004g05810	33.4054	2.07833	0.615578	3.37622	0.000734891	0.00822871
148	VIT_214s0060g02440	41.695	2.07664	0.610502	3.40153	0.000670097	0.00760134
149	VIT_214s0081g00400	59.5488	2.04457	0.581681	3.51494	0.000439851	0.00527159
150	VIT_200s0525g00020	47.387	2.04103	0.496794	4.1084	3.98e-05	0.000623097
151	VIT_212s0055g00700	24.3513	2.01344	0.649194	3.10145	0.00192574	0.0186988
152	VIT_216s0039g02800	37.0926	2.0068	0.491599	4.08218	4.46e-05	0.000690955
153	VIT_210s0003g05130	26.281	1.99555	0.703688	2.83584	0.00457056	0.0374436
154	VIT_202s0025g00150	32.2157	1.99329	0.513793	3.87956	0.000104647	0.00148672
155	VIT_219s0027g00700	66.1296	1.99013	0.683781	2.91048	0.00360878	0.0311696
156	VIT_200s0505g00030	90.7641	1.98262	0.669296	2.96225	0.00305398	0.0272289
157	VIT_201s0011g01910	18.7393	1.96581	0.663524	2.96268	0.00304973	0.0272037
158	VIT_210s0003g05160	12.9392	1.95126	0.717444	2.71974	0.00653342	0.0493889
159	VIT_212s0035g01045	65.0681	1.95097	0.41894	4.65691	3.21e-06	6.22e-05
160	VIT_219s0014g04850	48.4012	1.94243	0.660085	2.94269	0.00325371	0.0286087
161	VIT_208s0007g05160	92.0645	1.94149	0.692872	2.80209	0.00507725	0.0407205
162	VIT_213s0156g00630	14.739	1.93576	0.706456	2.74009	0.00614216	0.047189
163	VIT_213s0084g00750	41.5691	1.92572	0.657851	2.92728	0.00341937	0.0297771
164	VIT_216s0098g00720	607.363	1.91954	0.214399	8.9531	3.46e-19	3.35e-17
165	VIT_208s0007g06870	129.388	1.88689	0.413804	4.55986	5.12e-06	9.5e-05
166	VIT_211s0103g00540	44.3917	1.85055	0.455443	4.0632	4.84e-05	0.000744817
167	VIT_218s0001g08690	179.407	1.84676	0.381085	4.84605	1.26e-06	2.65e-05
168	VIT_206s0009g02830	58.9886	1.81447	0.606952	2.98947	0.00279461	0.0253307
169	VIT_204s0023g03550	1669.35	1.81275	0.413003	4.38919	1.14e-05	0.000198068
170	VIT_218s0001g07850	37.3478	1.79226	0.61333	2.92219	0.00347582	0.0302135
171	VIT_211s0118g00390	23.9922	1.79204	0.633846	2.82725	0.00469503	0.0382825
172	VIT_213s0067g01450	154.538	1.78064	0.354308	5.02569	5.02e-07	1.11e-05
173	VIT_202s0025g01870	55.6702	1.74753	0.452169	3.86477	0.000111192	0.00156919
174	VIT_215s0048g02860	129.434	1.74234	0.479844	3.63106	0.000282265	0.00356008
175	VIT_211s0016g05490	68.3622	1.73883	0.349738	4.9718	6.63e-07	1.45e-05
176	VIT_209s0002g03460	268.691	1.73163	0.333506	5.1922	2.08e-07	4.99e-06
177	VIT_211s0016g02210	697.495	1.697	0.290809	5.83543	5.37e-09	1.62e-07
178	VIT_216s0050g02550	33.7792	1.67958	0.54786	3.06571	0.0021715	0.0205824
179	VIT_215s0046g02825	43.3344	1.64821	0.543574	3.03217	0.00242798	0.0226201
180	VIT_216s0050g00830	26.3846	1.63866	0.597452	2.74275	0.00609279	0.046913
181	VIT_205s0020g03970	168.756	1.63607	0.436285	3.74999	0.000176842	0.00236119
182	VIT_203s0038g02310	412.154	1.63311	0.267056	6.11523	9.64e-10	3.24e-08
183	VIT_215s0048g00680	65.5848	1.62493	0.487113	3.33584	0.000850417	0.00932526
184	VIT_219s0015g01140	21.2158	1.62273	0.594432	2.72988	0.0063357	0.0482961
185	VIT_200s0379g00070	67.4361	1.6191	0.45519	3.55697	0.00037516	0.00457969
186	VIT_207s0005g01050	40.9023	1.60349	0.555919	2.88439	0.00392173	0.0333304
187	VIT_204s0008g01290	579.9	1.59565	0.257699	6.19193	5.94e-10	2.05e-08
188	VIT_218s0001g08240	145.231	1.58068	0.331869	4.76298	1.91e-06	3.88e-05
189	VIT_201s0010g02480	343.398	1.56869	0.236301	6.63855	3.17e-11	1.26e-09
190	VIT_218s0001g07970	79.5918	1.56539	0.392364	3.98965	6.62e-05	0.00098869
191	VIT_208s0040g02260	152.004	1.55484	0.309434	5.02479	5.04e-07	1.12e-05
192	VIT_200s1353g00010	439.276	1.55139	0.187815	8.26022	1.45e-16	1.01e-14
193	VIT_214s0219g00040	59.7541	1.5384	0.449796	3.42021	0.000625733	0.0071491
194	VIT_203s0088g00300	49.1954	1.53764	0.485525	3.16696	0.00154041	0.0155672
195	VIT_200s0299g00070	45.8761	1.53221	0.531291	2.88394	0.00392737	0.0333337
196	VIT_200s0391g00010	61.4742	1.52308	0.38227	3.98431	6.77e-05	0.00100645
197	VIT_204s0008g02450	46.9402	1.52192	0.502295	3.02993	0.00244607	0.0227442
198	VIT_208s0058g01110	85.578	1.51589	0.423326	3.5809	0.000342411	0.00423308
199	VIT_218s0001g10690	305.632	1.51445	0.36774	4.11827	3.82e-05	0.000597485
200	VIT_212s0028g03350	95.9261	1.51251	0.372199	4.0637	4.83e-05	0.000743808
201	VIT_212s0035g00830	35.1549	1.50153	0.496019	3.02717	0.00246854	0.0228869
1	VIT_203s0132g00390	410.149	-1.50574	0.197289	-7.63211	2.31e-14	1.33e-12
2	VIT_214s0081g00730	59.6317	-1.50725	0.546121	-2.75991	0.00578166	0.0449646
3	VIT_206s0080g01230	26290.7	-1.50825	0.176207	-8.55955	1.13e-17	9.4e-16
4	VIT_212s0057g01430	741.278	-1.51155	0.227325	-6.64929	2.95e-11	1.18e-09
5	VIT_203s0038g00130	136.889	-1.51448	0.341234	-4.43826	9.07e-06	0.000160515
6	VIT_208s0040g00870	14053.6	-1.51588	0.1556	-9.74218	1.99e-22	2.73e-20
7	VIT_215s0046g02480	2536.92	-1.51769	0.166121	-9.13605	6.48e-20	6.5e-18
8	VIT_204s0044g01760	38.361	-1.52084	0.462603	-3.28757	0.00101055	0.0107838
9	VIT_200s0388g00020	256.835	-1.52665	0.380793	-4.00914	6.09e-05	0.00091698
10	VIT_217s0000g06960	108.037	-1.52876	0.304382	-5.0225	5.1e-07	1.13e-05
11	VIT_215s0048g00340	400.69	-1.52879	0.245188	-6.23517	4.51e-10	1.59e-08
12	VIT_205s0077g01720	1157.39	-1.52968	0.173446	-8.81937	1.15e-18	1.05e-16
13	VIT_213s0156g00150	408.334	-1.5309	0.226707	-6.75276	1.45e-11	6.14e-10
14	VIT_218s0001g02420	3089.84	-1.53266	0.20628	-7.43	1.09e-13	5.77e-12
15	VIT_207s0005g00660	3652.77	-1.53529	0.217955	-7.04407	1.87e-12	8.82e-11
16	VIT_213s0067g00700	733.565	-1.54188	0.204571	-7.53712	4.8e-14	2.69e-12
17	VIT_201s0026g01430	2663.27	-1.54229	0.211537	-7.29087	3.08e-13	1.58e-11
18	VIT_211s0016g03190	141.298	-1.54393	0.452198	-3.41428	0.000639506	0.00728403
19	VIT_214s0128g00120	12367.8	-1.54469	0.193849	-7.96854	1.61e-15	1.05e-13
20	VIT_215s0048g02260	386.821	-1.54471	0.254765	-6.0633	1.33e-09	4.42e-08
21	VIT_213s0019g04390	1490.53	-1.54636	0.301641	-5.12648	2.95e-07	6.84e-06
22	VIT_203s0017g02000	1480.61	-1.54702	0.304793	-5.07564	3.86e-07	8.75e-06
23	VIT_212s0034g00770	723.85	-1.54719	0.188463	-8.20952	2.22e-16	1.54e-14
24	VIT_216s0098g01000	71.6274	-1.55218	0.424734	-3.65447	0.00025771	0.00329344
25	VIT_203s0132g00340	2408.98	-1.55625	0.170817	-9.11061	8.19e-20	8.18e-18
26	VIT_212s0034g00850	196.319	-1.5603	0.333457	-4.67918	2.88e-06	5.63e-05
27	VIT_218s0001g11900	212.439	-1.56083	0.221578	-7.04414	1.87e-12	8.82e-11
28	VIT_209s0070g00490	1042.4	-1.56664	0.199489	-7.85327	4.05e-15	2.56e-13
29	VIT_214s0030g02090	71.0259	-1.56856	0.412962	-3.79831	0.000145686	0.00198549
30	VIT_215s0048g01365	211.511	-1.5696	0.354781	-4.42415	9.68e-06	0.000170112
31	VIT_218s0001g11130	959.589	-1.56985	0.309153	-5.0779	3.82e-07	8.66e-06
32	VIT_214s0066g01840	286.839	-1.57067	0.246278	-6.37764	1.8e-10	6.59e-09
33	VIT_205s0062g00270	10924.2	-1.57165	0.247205	-6.35771	2.05e-10	7.46e-09
34	VIT_204s0044g00750	718.307	-1.57268	0.225379	-6.97793	3e-12	1.38e-10
35	VIT_216s0050g00270	669.403	-1.57472	0.239805	-6.5667	5.14e-11	2e-09
36	VIT_210s0042g00770	177.393	-1.57497	0.36223	-4.34799	1.37e-05	0.000235741
37	VIT_212s0057g00010	5206.16	-1.57676	0.163591	-9.63844	5.5e-22	7.09e-20
38	VIT_205s0049g01200	62.568	-1.57909	0.507172	-3.11353	0.00184864	0.0180883
39	VIT_218s0089g00690	69.404	-1.58091	0.37817	-4.18043	2.91e-05	0.000466506
40	VIT_212s0059g01340	1052.64	-1.58183	0.226365	-6.98796	2.79e-12	1.29e-10
41	VIT_206s0004g06750	1281.66	-1.58293	0.178768	-8.85466	8.39e-19	7.74e-17
42	VIT_211s0016g04190	1230.66	-1.58458	0.392394	-4.03824	5.39e-05	0.000817449
43	VIT_206s0004g07930	351.515	-1.58481	0.265812	-5.96215	2.49e-09	7.98e-08
44	VIT_215s0048g02320	42.5424	-1.58517	0.48181	-3.29003	0.00100177	0.0107035
45	VIT_200s1830g00010	32.3239	-1.58856	0.412609	-3.85005	0.000118094	0.00165193
46	VIT_218s0001g11830	685.219	-1.58973	0.254151	-6.25507	3.97e-10	1.4e-08
47	VIT_219s0014g05170	482.083	-1.5941	0.252998	-6.30085	2.96e-10	1.06e-08
48	VIT_201s0026g02080	4355.96	-1.59431	0.205435	-7.76065	8.45e-15	5.18e-13
49	VIT_203s0091g00690	6366.6	-1.59844	0.169801	-9.41358	4.8e-21	5.51e-19
50	VIT_214s0060g01460	253.183	-1.60007	0.166691	-9.599	8.07e-22	1.02e-19
51	VIT_213s0019g05400	573.184	-1.60033	0.236237	-6.77427	1.25e-11	5.33e-10
52	VIT_206s0009g00680	1090.9	-1.60126	0.188521	-8.49377	2e-17	1.58e-15
53	VIT_219s0014g00810	42.2892	-1.60328	0.541783	-2.95927	0.00308367	0.0274295
54	VIT_202s0025g04060	1812.92	-1.61053	0.291386	-5.52714	3.25e-08	8.67e-07
55	VIT_215s0046g02110	1426.53	-1.61119	0.304161	-5.29716	1.18e-07	2.94e-06
56	VIT_205s0020g04670	110.756	-1.61162	0.52831	-3.05053	0.00228441	0.0214924
57	VIT_207s0005g02070	116.22	-1.61736	0.534502	-3.02593	0.0024787	0.022958
58	VIT_204s0008g01220	938.327	-1.62127	0.232712	-6.96688	3.24e-12	1.48e-10
59	VIT_204s0044g00050	49.1553	-1.62164	0.458249	-3.53878	0.000401985	0.00487286
60	VIT_215s0046g01390	110.371	-1.622	0.483355	-3.35572	0.000791591	0.00878114
61	VIT_209s0002g01090	1146.47	-1.62305	0.190394	-8.52466	1.53e-17	1.24e-15
62	VIT_219s0014g05160	48.4676	-1.6234	0.423822	-3.83039	0.000127942	0.0017715
63	VIT_212s0028g03580	1141.85	-1.62525	0.167812	-9.68497	3.49e-22	4.6e-20
64	VIT_213s0084g00670	720.508	-1.63289	0.311971	-5.23409	1.66e-07	4.05e-06
65	VIT_203s0132g00350	144.446	-1.63363	0.309242	-5.28269	1.27e-07	3.16e-06
66	VIT_214s0006g00180	1705.56	-1.63476	0.173239	-9.43643	3.86e-21	4.51e-19
67	VIT_204s0044g00730	698.276	-1.63485	0.272828	-5.99223	2.07e-09	6.71e-08
68	VIT_200s0620g00010	2469.63	-1.63541	0.212676	-7.68967	1.48e-14	8.74e-13
69	VIT_206s0004g08440	822.132	-1.63604	0.229553	-7.12707	1.03e-12	5.04e-11
70	VIT_209s0002g05360	236.61	-1.63607	0.260508	-6.28031	3.38e-10	1.2e-08
71	VIT_205s0102g00450	51.3135	-1.63762	0.516138	-3.17283	0.00150958	0.0152881
72	VIT_215s0045g00640	54.531	-1.63888	0.446663	-3.66916	0.000243349	0.00313723
73	VIT_211s0016g04700	6780.7	-1.63894	0.167942	-9.75894	1.69e-22	2.39e-20
74	VIT_214s0060g02390	395.916	-1.63901	0.273379	-5.99538	2.03e-09	6.59e-08
75	VIT_214s0060g02150	462.711	-1.63906	0.247303	-6.62772	3.41e-11	1.35e-09
76	VIT_217s0000g05850	1902.9	-1.64117	0.157482	-10.4214	1.98e-25	3.78e-23
77	VIT_208s0007g07670	185.839	-1.64144	0.433062	-3.79031	0.000150458	0.00204469
78	VIT_206s0004g01020	546.527	-1.64253	0.436621	-3.76191	0.000168619	0.00225931
79	VIT_201s0026g02310	762.342	-1.64394	0.240496	-6.83561	8.17e-12	3.53e-10
80	VIT_205s0077g01970	5001.48	-1.64474	0.198414	-8.28942	1.14e-16	7.98e-15
81	VIT_217s0000g03420	33.9802	-1.64714	0.516838	-3.18695	0.00143783	0.0146469
82	VIT_210s0003g00160	54.6616	-1.64756	0.571926	-2.88073	0.00396753	0.0336297
83	VIT_214s0066g01710	443.308	-1.65101	0.194777	-8.4764	2.32e-17	1.79e-15
84	VIT_210s0003g00390	806.847	-1.65179	0.268143	-6.16013	7.27e-10	2.48e-08
85	VIT_209s0002g00990	876.126	-1.65243	0.194784	-8.48341	2.19e-17	1.69e-15
86	VIT_216s0050g01250	1274.2	-1.65826	0.194058	-8.54519	1.28e-17	1.05e-15
87	VIT_212s0034g00660	146.792	-1.65891	0.267845	-6.19353	5.88e-10	2.04e-08
88	VIT_206s0004g06840	6901.05	-1.6595	0.221547	-7.49048	6.86e-14	3.76e-12
89	VIT_206s0004g05870	120.702	-1.66058	0.520308	-3.19154	0.00141516	0.0144314
90	VIT_204s0044g00040	126.479	-1.66095	0.38816	-4.27904	1.88e-05	0.000313325
91	VIT_219s0014g03290	1892.48	-1.66201	0.431318	-3.85333	0.000116522	0.00163476
92	VIT_213s0067g00260	25396.1	-1.66275	0.170473	-9.75375	1.78e-22	2.48e-20
93	VIT_200s0194g00120	501.16	-1.66341	0.316501	-5.25561	1.48e-07	3.63e-06
94	VIT_203s0180g00210	317.426	-1.66365	0.271013	-6.13864	8.32e-10	2.82e-08
95	VIT_204s0069g00920	2749.27	-1.66385	0.179535	-9.26755	1.9e-20	2e-18
96	VIT_218s0001g15270	2497.6	-1.66638	0.152509	-10.9264	8.62e-28	2.28e-25
97	VIT_211s0016g01810	27449.6	-1.66741	0.25049	-6.6566	2.8e-11	1.13e-09
98	VIT_201s0011g04650	160.622	-1.6679	0.350305	-4.76129	1.92e-06	3.91e-05
99	VIT_200s1787g00005	38.6482	-1.6697	0.472695	-3.53229	0.000411978	0.00496873
100	VIT_207s0031g02840	306.898	-1.67286	0.286464	-5.83969	5.23e-09	1.59e-07
101	VIT_213s0067g01070	32932.9	-1.67348	0.220743	-7.58111	3.43e-14	1.95e-12
102	VIT_216s0050g01390	1012.41	-1.6766	0.262702	-6.38215	1.75e-10	6.42e-09
103	VIT_217s0000g04750	29427.2	-1.67767	0.175322	-9.56905	1.08e-21	1.35e-19
104	VIT_207s0031g00080	768.609	-1.67925	0.250438	-6.70524	2.01e-11	8.3e-10
105	VIT_202s0033g01375	91.4561	-1.67979	0.367732	-4.56798	4.92e-06	9.17e-05
106	VIT_206s0004g06580	486.909	-1.6801	0.206627	-8.13106	4.26e-16	2.89e-14
107	VIT_214s0006g00450	111.458	-1.68069	0.432676	-3.88442	0.000102574	0.00146381
108	VIT_218s0072g00370	917.71	-1.68307	0.189459	-8.88356	6.48e-19	6.03e-17
109	VIT_206s0061g01430	74.2313	-1.68629	0.415558	-4.0579	4.95e-05	0.000759473
110	VIT_214s0006g01600	816.25	-1.6871	0.214306	-7.87241	3.48e-15	2.21e-13
111	VIT_205s0020g03190	3172.43	-1.68756	0.290593	-5.80728	6.35e-09	1.88e-07
112	VIT_206s0080g00790	74.4193	-1.68862	0.500129	-3.37637	0.000734502	0.00822871
113	VIT_215s0048g02070	1398.75	-1.68889	0.422044	-4.0017	6.29e-05	0.000942655
114	VIT_215s0046g00980	3526	-1.69152	0.141681	-11.9389	7.42e-33	3.95e-30
115	VIT_208s0007g05000	227.576	-1.69461	0.381671	-4.43999	9e-06	0.00015938
116	VIT_204s0069g00390	347.269	-1.69503	0.286547	-5.91537	3.31e-09	1.03e-07
117	VIT_202s0025g01360	45.7878	-1.69864	0.54789	-3.10034	0.00193301	0.0187408
118	VIT_212s0059g01580	153.432	-1.69888	0.304882	-5.57226	2.51e-08	6.84e-07
119	VIT_200s0160g00090	27.4477	-1.69929	0.56385	-3.01373	0.00258059	0.0237405
120	VIT_214s0066g02350	1743.99	-1.70215	0.181766	-9.36452	7.64e-21	8.38e-19
121	VIT_209s0096g00490	372.486	-1.70262	0.38336	-4.44131	8.94e-06	0.000158552
122	VIT_205s0051g00780	81.7011	-1.70367	0.431451	-3.9487	7.86e-05	0.00114448
123	VIT_219s0027g00390	234.451	-1.70716	0.265445	-6.4313	1.27e-10	4.75e-09
124	VIT_208s0058g00680	177.047	-1.7075	0.302061	-5.65284	1.58e-08	4.43e-07
125	VIT_204s0023g03420	2981.04	-1.70881	0.172032	-9.9331	2.99e-23	4.49e-21
126	VIT_207s0129g01110	1881.21	-1.70981	0.157476	-10.8576	1.83e-27	4.8e-25
127	VIT_216s0013g00220	131.984	-1.7126	0.320184	-5.34879	8.85e-08	2.24e-06
128	VIT_209s0054g00900	85.256	-1.71288	0.382774	-4.47491	7.64e-06	0.00013799
129	VIT_218s0001g14940	29.0369	-1.71378	0.548582	-3.12401	0.00178402	0.0175731
130	VIT_200s0374g00020	2402.57	-1.71472	0.217014	-7.90142	2.76e-15	1.78e-13
131	VIT_218s0166g00230	39.4603	-1.7153	0.465605	-3.68403	0.000229574	0.00298181
132	VIT_200s0456g00040	201.802	-1.7165	0.307753	-5.57754	2.44e-08	6.67e-07
133	VIT_209s0002g05600	17287.4	-1.72116	0.253448	-6.79099	1.11e-11	4.78e-10
134	VIT_219s0014g05430	1750.51	-1.72245	0.218681	-7.87654	3.37e-15	2.15e-13
135	VIT_211s0016g01520	392.475	-1.7234	0.249865	-6.89734	5.3e-12	2.36e-10
136	VIT_215s0045g00920	145.174	-1.72497	0.269513	-6.40031	1.55e-10	5.74e-09
137	VIT_204s0008g00440	1187.01	-1.72659	0.19345	-8.92528	4.45e-19	4.28e-17
138	VIT_216s0098g01150	57.6727	-1.72775	0.47694	-3.62257	0.000291687	0.00366144
139	VIT_217s0000g02085	252.059	-1.72883	0.301242	-5.73901	9.52e-09	2.74e-07
140	VIT_200s0179g00260	1633.44	-1.73228	0.251844	-6.87839	6.05e-12	2.68e-10
141	VIT_218s0041g00010	131.289	-1.734	0.370341	-4.68218	2.84e-06	5.55e-05
142	VIT_212s0055g00460	858.044	-1.73611	0.200119	-8.67541	4.12e-18	3.59e-16
143	VIT_215s0046g00470	550.516	-1.739	0.233863	-7.43597	1.04e-13	5.53e-12
144	VIT_211s0118g00470	1568.83	-1.73908	0.148279	-11.7284	9.11e-32	4.14e-29
145	VIT_203s0017g00920	275.264	-1.73912	0.286105	-6.07862	1.21e-09	4.03e-08
146	VIT_216s0039g01310	536.481	-1.73999	0.233202	-7.46132	8.57e-14	4.63e-12
147	VIT_200s2349g00010	2664.51	-1.74125	0.234047	-7.43974	1.01e-13	5.39e-12
148	VIT_215s0045g00680	317.838	-1.74217	0.232511	-7.49287	6.74e-14	3.71e-12
149	VIT_201s0146g00250	1654.06	-1.74308	0.213018	-8.18276	2.77e-16	1.91e-14
150	VIT_212s0034g00370	32.7936	-1.74362	0.635938	-2.74181	0.00611024	0.0470094
151	VIT_209s0002g00890	3248.72	-1.7444	0.223185	-7.81591	5.46e-15	3.4e-13
152	VIT_201s0011g03430	275.761	-1.74642	0.384874	-4.53765	5.69e-06	0.000104767
153	VIT_210s0116g00170	48.4906	-1.74687	0.577357	-3.02564	0.00248111	0.0229693
154	VIT_202s0025g05120	936.083	-1.74694	0.247035	-7.07162	1.53e-12	7.32e-11
155	VIT_202s0012g00550	1989.8	-1.74748	0.165195	-10.5783	3.76e-26	8.06e-24
156	VIT_206s0009g01620	2321.97	-1.74758	0.227882	-7.6688	1.74e-14	1.02e-12
157	VIT_205s0020g03030	352.474	-1.74804	0.25377	-6.88829	5.65e-12	2.51e-10
158	VIT_215s0046g03660	132.645	-1.75023	0.447597	-3.91029	9.22e-05	0.00132747
159	VIT_218s0001g08570	214.133	-1.75293	0.262621	-6.67478	2.48e-11	1.01e-09
160	VIT_203s0038g00490	1772.24	-1.75324	0.170142	-10.3046	6.72e-25	1.26e-22
161	VIT_209s0070g00160	10621.3	-1.76046	0.188536	-9.33749	9.86e-21	1.08e-18
162	VIT_210s0003g00580	658.663	-1.76075	0.262634	-6.70419	2.03e-11	8.35e-10
163	VIT_218s0001g06260	22.7737	-1.76082	0.646323	-2.72436	0.00644258	0.0488571
164	VIT_202s0025g01510	1021.54	-1.76209	0.207947	-8.47379	2.38e-17	1.82e-15
165	VIT_218s0122g00180	3192.72	-1.76453	0.248885	-7.08974	1.34e-12	6.49e-11
166	VIT_203s0017g00660	49.7897	-1.76513	0.442449	-3.98945	6.62e-05	0.000988731
167	VIT_200s0407g00020	845.271	-1.76531	0.254678	-6.93155	4.16e-12	1.88e-10
168	VIT_215s0046g00440	974.445	-1.76577	0.179133	-9.85733	6.37e-23	9.21e-21
169	VIT_200s1764g00020	58.6577	-1.76688	0.411396	-4.29484	1.75e-05	0.000294147
170	VIT_201s0146g00150	22203.4	-1.76734	0.392575	-4.50191	6.73e-06	0.000122962
171	VIT_207s0197g00240	4563.18	-1.76785	0.21355	-8.27841	1.25e-16	8.69e-15
172	VIT_207s0005g02100	500.816	-1.77181	0.297663	-5.95241	2.64e-09	8.36e-08
173	VIT_208s0040g00960	232.556	-1.77228	0.434643	-4.07754	4.55e-05	0.000704303
174	VIT_208s0007g06580	294.281	-1.77302	0.322014	-5.50605	3.67e-08	9.7e-07
175	VIT_207s0151g00810	266.461	-1.77801	0.25839	-6.88112	5.94e-12	2.63e-10
176	VIT_204s0023g02380	1169.25	-1.78435	0.222944	-8.00357	1.21e-15	7.98e-14
177	VIT_205s0077g01500	1210.3	-1.78557	0.205127	-8.7047	3.18e-18	2.83e-16
178	VIT_214s0066g02060	5507.38	-1.78771	0.165077	-10.8295	2.49e-27	6.18e-25
179	VIT_217s0000g06300	21.5471	-1.79065	0.605193	-2.95881	0.00308834	0.0274583
180	VIT_200s0294g00100	36.9795	-1.7908	0.538258	-3.32703	0.00087777	0.0095702
181	VIT_204s0008g00410	257.463	-1.79096	0.279694	-6.40326	1.52e-10	5.65e-09
182	VIT_208s0032g01150	5774.03	-1.79329	0.215616	-8.31706	9.02e-17	6.4e-15
183	VIT_212s0028g03010	5613.97	-1.79353	0.191356	-9.37272	7.07e-21	7.89e-19
184	VIT_208s0007g00100	61.3102	-1.79521	0.57898	-3.10064	0.00193104	0.0187312
185	VIT_214s0066g02090	142.853	-1.79547	0.38145	-4.70697	2.51e-06	4.97e-05
186	VIT_208s0105g00190	2262.6	-1.79712	0.238263	-7.54259	4.61e-14	2.59e-12
187	VIT_205s0020g03270	2621.51	-1.7989	0.210244	-8.55624	1.17e-17	9.63e-16
188	VIT_215s0048g01350	94.7263	-1.79941	0.555119	-3.24148	0.00118913	0.0124389
189	VIT_205s0020g04000	543.88	-1.802	0.24205	-7.44474	9.71e-14	5.22e-12
190	VIT_213s0156g00570	322.287	-1.8023	0.257407	-7.00176	2.53e-12	1.18e-10
191	VIT_202s0025g04460	1579.67	-1.80497	0.273475	-6.60014	4.11e-11	1.62e-09
192	VIT_203s0038g03410	3746.92	-1.81037	0.235647	-7.68255	1.56e-14	9.21e-13
193	VIT_212s0057g00250	97.4554	-1.81205	0.382611	-4.73602	2.18e-06	4.39e-05
194	VIT_212s0028g01860	171.027	-1.81225	0.407264	-4.44983	8.59e-06	0.000152959
195	VIT_216s0050g01420	2544.04	-1.81264	0.217029	-8.35205	6.71e-17	4.83e-15
196	VIT_219s0014g02850	169.105	-1.81387	0.41429	-4.37826	1.2e-05	0.000207314
197	VIT_216s0098g00710	92.1563	-1.81707	0.369443	-4.9184	8.73e-07	1.88e-05
198	VIT_207s0031g01710	2545.13	-1.81855	0.209221	-8.69199	3.56e-18	3.13e-16
199	VIT_218s0089g00660	109.809	-1.81909	0.532253	-3.41772	0.000631476	0.00721038
200	VIT_206s0004g04580	1470.82	-1.82198	0.151328	-12.0399	2.19e-33	1.27e-30
201	VIT_200s0477g00010	487.801	-1.82599	0.21514	-8.48747	2.11e-17	1.65e-15
202	VIT_219s0090g01490	5113.46	-1.82721	0.194566	-9.3912	5.93e-21	6.66e-19
203	VIT_204s0044g01000	656.604	-1.82848	0.219646	-8.32466	8.46e-17	6.04e-15
204	VIT_204s0044g01420	429.577	-1.83243	0.27002	-6.78629	1.15e-11	4.92e-10
205	VIT_200s0144g00220	324.788	-1.83294	0.321617	-5.69913	1.2e-08	3.42e-07
206	VIT_217s0000g04880	198.815	-1.84001	0.383582	-4.79691	1.61e-06	3.32e-05
207	VIT_211s0016g03900	499.297	-1.84225	0.274473	-6.71197	1.92e-11	7.96e-10
208	VIT_205s0020g01395	75.4307	-1.84236	0.50709	-3.63319	0.000279934	0.00353718
209	VIT_207s0141g00890	664.639	-1.84276	0.463224	-3.97812	6.95e-05	0.00102978
210	VIT_200s0353g00050	1332.53	-1.84311	0.212141	-8.68813	3.68e-18	3.22e-16
211	VIT_215s0046g02190	1011.67	-1.84392	0.268402	-6.86999	6.42e-12	2.82e-10
212	VIT_205s0020g04560	1113.4	-1.84428	0.212005	-8.69922	3.34e-18	2.95e-16
213	VIT_218s0001g11630	5100.49	-1.84446	0.364141	-5.06523	4.08e-07	9.19e-06
214	VIT_216s0098g00760	6538.86	-1.84689	0.182406	-10.1252	4.27e-24	7.21e-22
215	VIT_200s0301g00090	411.056	-1.84791	0.607746	-3.04059	0.00236113	0.0220836
216	VIT_216s0039g01850	623.575	-1.85028	0.194987	-9.48926	2.33e-21	2.79e-19
217	VIT_218s0122g00240	212.805	-1.85063	0.181991	-10.1688	2.73e-24	4.74e-22
218	VIT_213s0156g00590	553.466	-1.85184	0.351377	-5.27024	1.36e-07	3.37e-06
219	VIT_219s0014g04090	355.347	-1.85232	0.287423	-6.44458	1.16e-10	4.37e-09
220	VIT_208s0007g08840	671.172	-1.85282	0.22169	-8.3577	6.4e-17	4.64e-15
221	VIT_208s0007g06610	51.9241	-1.85472	0.538737	-3.44271	0.000575912	0.00665964
222	VIT_206s0061g01300	2529.22	-1.85633	0.208749	-8.89266	5.97e-19	5.64e-17
223	VIT_200s0199g00310	7112.77	-1.86103	0.241936	-7.69223	1.45e-14	8.62e-13
224	VIT_213s0019g01372	29.0439	-1.86141	0.614049	-3.03137	0.0024345	0.0226587
225	VIT_212s0028g01650	191.482	-1.86823	0.332123	-5.6251	1.85e-08	5.15e-07
226	VIT_215s0021g01150	29.6822	-1.86856	0.667542	-2.79916	0.00512355	0.040975
227	VIT_216s0050g01690	3103.75	-1.86954	0.237556	-7.86989	3.55e-15	2.25e-13
228	VIT_211s0206g00070	659.947	-1.87058	0.241703	-7.73914	1e-14	6.02e-13
229	VIT_216s0100g00720	497.578	-1.87124	0.311241	-6.01219	1.83e-09	5.98e-08
230	VIT_200s0160g00320	91.8711	-1.87726	0.445131	-4.21732	2.47e-05	0.000404542
231	VIT_215s0048g02310	100.501	-1.87734	0.463518	-4.05021	5.12e-05	0.000782347
232	VIT_211s0016g01190	1352.16	-1.88094	0.220779	-8.51957	1.6e-17	1.29e-15
233	VIT_205s0020g03480	46.3229	-1.88219	0.437117	-4.30591	1.66e-05	0.000280549
234	VIT_205s0077g02350	130.064	-1.88429	0.412101	-4.57241	4.82e-06	9.01e-05
235	VIT_206s0080g00910	75.9301	-1.88471	0.49194	-3.83118	0.00012753	0.00176709
236	VIT_205s0062g00310	4590.23	-1.88536	0.243549	-7.74119	9.85e-15	5.95e-13
237	VIT_211s0206g00080	207.999	-1.88546	0.425694	-4.42914	9.46e-06	0.000166677
238	VIT_204s0008g02510	1780.37	-1.88602	0.223717	-8.43037	3.45e-17	2.58e-15
239	VIT_201s0010g00060	539.778	-1.89018	0.512087	-3.69112	0.000223266	0.00290977
240	VIT_213s0084g00130	1736.91	-1.89255	0.261973	-7.22422	5.04e-13	2.53e-11
241	VIT_201s0011g03330	755.518	-1.89521	0.225373	-8.40919	4.13e-17	3.04e-15
242	VIT_219s0014g04080	70.8853	-1.89593	0.375869	-5.04413	4.56e-07	1.02e-05
243	VIT_208s0007g08230	300.098	-1.89807	0.365711	-5.19007	2.1e-07	5.02e-06
244	VIT_202s0012g00540	204.641	-1.90058	0.277209	-6.85613	7.08e-12	3.08e-10
245	VIT_211s0016g05480	1578.38	-1.90407	0.185286	-10.2764	9.01e-25	1.65e-22
246	VIT_211s0052g01220	181.933	-1.90581	0.428564	-4.44696	8.71e-06	0.000154868
247	VIT_216s0050g01400	3859.21	-1.90709	0.207267	-9.20112	3.54e-20	3.65e-18
248	VIT_200s0317g00060	1439.82	-1.9075	0.220491	-8.65113	5.1e-18	4.42e-16
249	VIT_204s0008g05510	3582.93	-1.9096	0.23024	-8.29397	1.1e-16	7.71e-15
250	VIT_205s0062g00790	1391.4	-1.90968	0.215109	-8.87772	6.82e-19	6.32e-17
251	VIT_210s0003g01990	31.7103	-1.90993	0.688239	-2.77509	0.00551858	0.0433311
252	VIT_201s0127g00130	75.289	-1.91589	0.40243	-4.7608	1.93e-06	3.92e-05
253	VIT_203s0091g00480	379.798	-1.91683	0.200366	-9.56661	1.1e-21	1.37e-19
254	VIT_217s0000g08370	168.951	-1.92013	0.363807	-5.2779	1.31e-07	3.24e-06
255	VIT_201s0011g04550	1942.08	-1.92078	0.16089	-11.9385	7.46e-33	3.95e-30
256	VIT_218s0072g00990	2547.43	-1.92091	0.179752	-10.6864	1.18e-26	2.64e-24
257	VIT_211s0052g01730	828.878	-1.92604	0.658666	-2.92415	0.00345398	0.0300374
258	VIT_207s0005g01950	45.524	-1.92614	0.61996	-3.10688	0.0018907	0.0183867
259	VIT_208s0007g08300	8014.05	-1.92736	0.19023	-10.1317	3.99e-24	6.85e-22
260	VIT_217s0000g02360	152.247	-1.9287	0.347269	-5.55391	2.79e-08	7.55e-07
261	VIT_218s0001g07090	8595.67	-1.93025	0.229237	-8.42034	3.75e-17	2.78e-15
262	VIT_204s0044g02010	36.8153	-1.93063	0.560854	-3.44231	0.000576774	0.00666478
263	VIT_207s0031g01040	57.4742	-1.93147	0.564202	-3.42336	0.000618524	0.00707521
264	VIT_208s0007g06030	131.311	-1.93162	0.383042	-5.04284	4.59e-07	1.02e-05
265	VIT_219s0014g04670	103.055	-1.93263	0.356536	-5.42057	5.94e-08	1.52e-06
266	VIT_205s0077g01690	70.6476	-1.93985	0.558524	-3.47318	0.000514336	0.00604282
267	VIT_218s0001g06170	1557.41	-1.94186	0.407361	-4.76693	1.87e-06	3.82e-05
268	VIT_213s0019g03130	41.9896	-1.94286	0.663139	-2.9298	0.00339184	0.029632
269	VIT_217s0000g07370	174.238	-1.94391	0.280175	-6.93817	3.97e-12	1.8e-10
270	VIT_207s0005g03340	697.578	-1.94567	0.489192	-3.97731	6.97e-05	0.00103249
271	VIT_219s0093g00550	2580.5	-1.9461	0.419547	-4.63857	3.51e-06	6.76e-05
272	VIT_207s0031g00670	1540.81	-1.94618	0.20499	-9.49405	2.22e-21	2.68e-19
273	VIT_211s0016g03330	2206.42	-1.94746	0.210123	-9.2682	1.89e-20	2e-18
274	VIT_200s0487g00030	1736.98	-1.95177	0.206938	-9.43165	4.04e-21	4.7e-19
275	VIT_218s0001g07380	121.429	-1.95384	0.517272	-3.7772	0.000158603	0.00214468
276	VIT_218s0089g00060	51.3482	-1.95403	0.536071	-3.64508	0.000267304	0.00339781
277	VIT_202s0012g00400	397.994	-1.95672	0.513673	-3.80928	0.000139374	0.00190627
278	VIT_210s0003g00680	1263.38	-1.96153	0.221642	-8.84999	8.75e-19	8.03e-17
279	VIT_201s0011g00990	508.445	-1.96337	0.348732	-5.63002	1.8e-08	5.03e-07
280	VIT_211s0052g00230	165.89	-1.96445	0.331689	-5.92256	3.17e-09	9.93e-08
281	VIT_213s0019g04060	504.637	-1.96541	0.295194	-6.65804	2.77e-11	1.12e-09
282	VIT_216s0148g00290	116.856	-1.96597	0.329914	-5.95903	2.54e-09	8.07e-08
283	VIT_204s0008g05970	202.977	-1.97032	0.330017	-5.97035	2.37e-09	7.6e-08
284	VIT_205s0102g01062	55.0972	-1.97147	0.401969	-4.90452	9.37e-07	2e-05
285	VIT_218s0041g01330	2630.09	-1.97377	0.211922	-9.31366	1.24e-20	1.33e-18
286	VIT_218s0122g00230	1049.95	-1.97639	0.207716	-9.51487	1.82e-21	2.21e-19
287	VIT_211s0052g01085	20.7836	-1.97671	0.696974	-2.83613	0.00456634	0.0374413
288	VIT_212s0142g00590	104.757	-1.97716	0.408555	-4.8394	1.3e-06	2.73e-05
289	VIT_219s0014g04940	18269.5	-1.97788	0.174646	-11.3251	9.86e-30	3.24e-27
290	VIT_212s0057g00615	328.547	-1.98066	0.3744	-5.29023	1.22e-07	3.05e-06
291	VIT_210s0003g03790	413.764	-1.9815	0.628695	-3.15177	0.00162282	0.0162452
292	VIT_210s0597g00020	204.505	-1.98394	0.235614	-8.42032	3.75e-17	2.78e-15
293	VIT_219s0140g00230	13.495	-1.98615	0.69058	-2.87606	0.00402672	0.0339204
294	VIT_218s0001g05250	5113.84	-1.98674	0.16013	-12.4071	2.39e-35	1.83e-32
295	VIT_218s0001g15120	5829.9	-1.99344	0.203933	-9.77499	1.44e-22	2.05e-20
296	VIT_218s0117g00360	475.106	-1.99571	0.206037	-9.68614	3.45e-22	4.58e-20
297	VIT_209s0002g00220	1570.83	-2.00186	0.299273	-6.68909	2.25e-11	9.19e-10
298	VIT_208s0007g06560	319.038	-2.00989	0.306952	-6.54792	5.83e-11	2.27e-09
299	VIT_200s0515g00020	82.9292	-2.01025	0.368477	-5.45557	4.88e-08	1.27e-06
300	VIT_201s0011g03985	34.0916	-2.0116	0.725171	-2.77397	0.00553765	0.043445
301	VIT_200s0181g00220	126.143	-2.01271	0.367377	-5.47858	4.29e-08	1.13e-06
302	VIT_215s0045g01020	128.32	-2.0132	0.40093	-5.02132	5.13e-07	1.13e-05
303	VIT_213s0156g00245	86.9521	-2.01496	0.454351	-4.43481	9.22e-06	0.00016265
304	VIT_201s0011g04990	180.989	-2.02283	0.59025	-3.42707	0.00061014	0.00699187
305	VIT_207s0005g04070	184.711	-2.02663	0.372534	-5.44012	5.32e-08	1.38e-06
306	VIT_208s0007g06570	24.6817	-2.02851	0.667974	-3.0368	0.00239102	0.0223302
307	VIT_219s0014g01530	99.581	-2.02884	0.353031	-5.74692	9.09e-09	2.62e-07
308	VIT_216s0148g00360	41.1369	-2.02923	0.512042	-3.96301	7.4e-05	0.00108708
309	VIT_216s0050g01700	813.903	-2.02969	0.189155	-10.7303	7.33e-27	1.75e-24
310	VIT_218s0001g06270	1780.29	-2.03355	0.190269	-10.6878	1.16e-26	2.64e-24
311	VIT_208s0007g01070	757.206	-2.03555	0.292609	-6.95654	3.49e-12	1.59e-10
312	VIT_212s0059g00280	466.842	-2.03567	0.330401	-6.16121	7.22e-10	2.46e-08
313	VIT_202s0025g00280	58441.1	-2.03663	0.370304	-5.49987	3.8e-08	1e-06
314	VIT_201s0011g04270	476.925	-2.04168	0.233002	-8.7625	1.91e-18	1.71e-16
315	VIT_202s0025g01670	378.874	-2.04311	0.223486	-9.14201	6.13e-20	6.19e-18
316	VIT_200s0181g00120	402.741	-2.04577	0.259577	-7.88118	3.24e-15	2.08e-13
317	VIT_212s0059g01380	6541.67	-2.04973	0.179096	-11.4448	2.5e-30	8.98e-28
318	VIT_211s0052g00450	1694.28	-2.05238	0.200869	-10.2175	1.66e-24	2.95e-22
319	VIT_209s0002g05370	451.824	-2.05632	0.681311	-3.01818	0.002543	0.0234512
320	VIT_218s0072g00980	765.177	-2.0662	0.232115	-8.90162	5.5e-19	5.25e-17
321	VIT_206s0004g00690	47.693	-2.06953	0.554553	-3.73188	0.000190054	0.00251472
322	VIT_206s0004g07500	10548.7	-2.06987	0.207335	-9.98321	1.81e-23	2.8e-21
323	VIT_212s0055g00320	64.2659	-2.07272	0.60057	-3.45125	0.000557999	0.00648394
324	VIT_212s0028g01640	228.047	-2.07471	0.355812	-5.83091	5.51e-09	1.66e-07
325	VIT_218s0001g04150	1025.59	-2.07546	0.198089	-10.4774	1.1e-25	2.18e-23
326	VIT_200s0434g00090	103.446	-2.07684	0.375806	-5.52636	3.27e-08	8.7e-07
327	VIT_216s0013g01920	4054.72	-2.07812	0.193249	-10.7535	5.7e-27	1.38e-24
328	VIT_206s0004g01010	235.912	-2.07945	0.369115	-5.63362	1.76e-08	4.93e-07
329	VIT_216s0098g00410	273.031	-2.08226	0.260907	-7.98085	1.45e-15	9.56e-14
330	VIT_200s0463g00030	1614.9	-2.0837	0.318482	-6.5426	6.05e-11	2.34e-09
331	VIT_202s0012g00150	1675.52	-2.08465	0.27579	-7.55884	4.07e-14	2.29e-12
332	VIT_207s0031g02390	5195.34	-2.08584	0.188213	-11.0824	1.53e-28	4.42e-26
333	VIT_213s0156g00550	341.95	-2.08798	0.210839	-9.90319	4.03e-23	5.96e-21
334	VIT_205s0049g00930	419.28	-2.0893	0.277455	-7.53022	5.07e-14	2.82e-12
335	VIT_217s0000g07375	263.17	-2.09511	0.31283	-6.69728	2.12e-11	8.71e-10
336	VIT_211s0118g00815	190.014	-2.0998	0.410465	-5.11568	3.13e-07	7.2e-06
337	VIT_202s0033g00870	80.952	-2.10103	0.45527	-4.61491	3.93e-06	7.5e-05
338	VIT_218s0001g06110	1213.04	-2.10228	0.221627	-9.48569	2.41e-21	2.87e-19
339	VIT_205s0094g01570	776.194	-2.10571	0.212668	-9.90136	4.11e-23	5.98e-21
340	VIT_203s0132g00450	128.748	-2.10823	0.330549	-6.37796	1.79e-10	6.59e-09
341	VIT_207s0129g00350	370.835	-2.10927	0.27625	-7.63537	2.25e-14	1.3e-12
342	VIT_218s0041g01340	1467.96	-2.10984	0.229431	-9.19595	3.72e-20	3.81e-18
343	VIT_204s0008g06730	306.067	-2.11324	0.250676	-8.43016	3.45e-17	2.58e-15
344	VIT_218s0089g01030	201.757	-2.11444	0.70656	-2.99258	0.00276627	0.0251296
345	VIT_212s0028g01920	21.9985	-2.11648	0.635783	-3.32894	0.000871769	0.00952109
346	VIT_212s0134g00450	4428.78	-2.11731	0.185755	-11.3984	4.26e-30	1.48e-27
347	VIT_200s0258g00140	124.036	-2.11776	0.450199	-4.70405	2.55e-06	5.04e-05
348	VIT_203s0132g00040	111.284	-2.12176	0.331901	-6.39276	1.63e-10	6.01e-09
349	VIT_218s0041g02020	24245.4	-2.12355	0.277646	-7.6484	2.03e-14	1.18e-12
350	VIT_217s0000g01630	121.391	-2.12411	0.448597	-4.73501	2.19e-06	4.39e-05
351	VIT_210s0116g01200	17278.1	-2.12565	0.213252	-9.96776	2.11e-23	3.19e-21
352	VIT_218s0001g01320	555.45	-2.12775	0.239273	-8.89259	5.97e-19	5.64e-17
353	VIT_201s0127g00360	117.751	-2.13106	0.365212	-5.83513	5.37e-09	1.62e-07
354	VIT_201s0026g01880	2561.51	-2.13633	0.181532	-11.7683	5.69e-32	2.71e-29
355	VIT_213s0064g01510	802.218	-2.13905	0.295634	-7.23549	4.64e-13	2.34e-11
356	VIT_203s0038g03960	6223.28	-2.1446	0.182818	-11.7308	8.86e-32	4.12e-29
357	VIT_206s0004g04150	93.8485	-2.14856	0.489104	-4.39285	1.12e-05	0.000194937
358	VIT_217s0000g06860	4768.3	-2.14957	0.163562	-13.1423	1.88e-39	2.57e-36
359	VIT_213s0158g00170	139.144	-2.15039	0.264432	-8.1321	4.22e-16	2.88e-14
360	VIT_217s0000g05030	11595.2	-2.15766	0.187398	-11.5138	1.12e-30	4.12e-28
361	VIT_206s0004g04850	140.35	-2.15933	0.331055	-6.52257	6.91e-11	2.67e-09
362	VIT_208s0007g02360	4914.05	-2.15939	0.288511	-7.48461	7.18e-14	3.92e-12
363	VIT_209s0018g01660	468.769	-2.15996	0.25694	-8.40646	4.23e-17	3.09e-15
364	VIT_201s0150g00440	195.699	-2.16247	0.387969	-5.57382	2.49e-08	6.8e-07
365	VIT_214s0108g00890	971.602	-2.16371	0.25274	-8.56101	1.12e-17	9.36e-16
366	VIT_205s0094g00300	235.651	-2.1659	0.315488	-6.86523	6.64e-12	2.91e-10
367	VIT_203s0038g03660	20.8915	-2.16974	0.687691	-3.15512	0.00160435	0.0161025
368	VIT_207s0031g01010	38.372	-2.17033	0.56716	-3.82666	0.000129895	0.00179204
369	VIT_218s0001g06560	473.232	-2.17054	0.284979	-7.6165	2.61e-14	1.5e-12
370	VIT_215s0048g02300	1981.13	-2.17397	0.21199	-10.2551	1.12e-24	2.04e-22
371	VIT_214s0066g01830	1112.66	-2.17756	0.16871	-12.9071	4.1e-38	3.91e-35
372	VIT_201s0011g03850	580.002	-2.17822	0.269455	-8.08379	6.28e-16	4.19e-14
373	VIT_218s0001g01370	198.056	-2.17835	0.488244	-4.46161	8.13e-06	0.000145739
374	VIT_205s0102g00210	816.972	-2.17892	0.218419	-9.9759	1.94e-23	2.99e-21
375	VIT_200s0226g00045	180.948	-2.17968	0.369997	-5.89108	3.84e-09	1.18e-07
376	VIT_213s0019g01180	109.9	-2.18025	0.460398	-4.73558	2.18e-06	4.39e-05
377	VIT_217s0000g06710	598.817	-2.18118	0.234328	-9.30823	1.3e-20	1.39e-18
378	VIT_219s0014g04050	38.4657	-2.18263	0.502858	-4.34046	1.42e-05	0.000242653
379	VIT_206s0004g03620	979.397	-2.18305	0.228027	-9.57363	1.03e-21	1.3e-19
380	VIT_218s0001g09390	691.336	-2.18671	0.233503	-9.36478	7.62e-21	8.38e-19
381	VIT_218s0001g08580	575.72	-2.18695	0.306272	-7.14053	9.3e-13	4.6e-11
382	VIT_207s0005g04080	56.2458	-2.18933	0.452197	-4.84154	1.29e-06	2.7e-05
383	VIT_213s0019g03990	2541.6	-2.19286	0.19322	-11.3491	7.5e-30	2.51e-27
384	VIT_211s0052g01450	17.9863	-2.1932	0.77606	-2.82607	0.00471224	0.0383737
385	VIT_212s0034g02220	413.229	-2.19686	0.302736	-7.25671	3.97e-13	2.01e-11
386	VIT_218s0001g06030	669.666	-2.20075	0.356642	-6.17074	6.8e-10	2.34e-08
387	VIT_217s0000g08080	3288.54	-2.20144	0.264476	-8.32379	8.52e-17	6.07e-15
388	VIT_201s0011g02480	2493.52	-2.20604	0.284878	-7.74379	9.65e-15	5.84e-13
389	VIT_216s0039g01420	388.382	-2.20747	0.546179	-4.04165	5.31e-05	0.000806918
390	VIT_204s0008g01470	224.441	-2.20793	0.328003	-6.73144	1.68e-11	7.06e-10
391	VIT_204s0043g00310	755.405	-2.20981	0.230093	-9.60397	7.69e-22	9.78e-20
392	VIT_206s0061g00440	1136.92	-2.21313	0.303891	-7.28266	3.27e-13	1.67e-11
393	VIT_215s0046g01140	4393.29	-2.21524	0.22326	-9.92225	3.33e-23	4.97e-21
394	VIT_208s0007g05810	294.716	-2.21526	0.355726	-6.22743	4.74e-10	1.66e-08
395	VIT_207s0197g00130	2068.14	-2.21563	0.21053	-10.5241	6.69e-26	1.42e-23
396	VIT_218s0041g00740	88.8027	-2.22035	0.482836	-4.59854	4.25e-06	8.05e-05
397	VIT_216s0098g00420	541.038	-2.22133	0.236535	-9.39115	5.93e-21	6.66e-19
398	VIT_204s0008g01580	8322.66	-2.22135	0.676255	-3.28478	0.00102061	0.0108668
399	VIT_207s0197g00230	38.0958	-2.22501	0.589268	-3.77589	0.00015944	0.00215447
400	VIT_211s0016g03080	895.597	-2.22847	0.273263	-8.15504	3.49e-16	2.4e-14
401	VIT_213s0067g00930	1417.77	-2.22893	0.233907	-9.52914	1.59e-21	1.94e-19
402	VIT_211s0065g00350	139.354	-2.22946	0.463048	-4.81474	1.47e-06	3.06e-05
403	VIT_209s0002g02320	588.53	-2.23361	0.440287	-5.07307	3.91e-07	8.86e-06
404	VIT_205s0049g01750	857.289	-2.23455	0.20874	-10.705	9.65e-27	2.24e-24
405	VIT_216s0148g00210	315.451	-2.23846	0.261494	-8.56025	1.13e-17	9.38e-16
406	VIT_204s0044g00220	14189.9	-2.23974	0.197186	-11.3585	6.73e-30	2.29e-27
407	VIT_201s0011g03760	535.144	-2.24641	0.276807	-8.11545	4.84e-16	3.27e-14
408	VIT_211s0016g01640	63.8905	-2.25145	0.549051	-4.10062	4.12e-05	0.000641244
409	VIT_215s0045g00880	249.95	-2.25803	0.329575	-6.85135	7.32e-12	3.18e-10
410	VIT_214s0066g02190	5678.65	-2.26017	0.184896	-12.224	2.31e-34	1.58e-31
411	VIT_217s0000g07420	109.543	-2.26281	0.352782	-6.41418	1.42e-10	5.3e-09
412	VIT_208s0105g00180	973.242	-2.26386	0.223917	-10.1103	4.97e-24	8.25e-22
413	VIT_212s0059g02630	397.73	-2.26474	0.268382	-8.43849	3.21e-17	2.42e-15
414	VIT_209s0002g05490	1680.22	-2.26481	0.473169	-4.78646	1.7e-06	3.49e-05
415	VIT_207s0031g00530	6873.39	-2.27261	0.243576	-9.33018	1.06e-20	1.15e-18
416	VIT_208s0007g01690	714.15	-2.28079	0.26702	-8.54162	1.32e-17	1.08e-15
417	VIT_218s0001g08230	1612.56	-2.28122	0.370179	-6.16248	7.16e-10	2.45e-08
418	VIT_200s0179g00150	9484.71	-2.28259	0.270295	-8.44481	3.05e-17	2.31e-15
419	VIT_203s0017g02110	935.4	-2.28343	0.298492	-7.64989	2.01e-14	1.17e-12
420	VIT_200s0409g00060	36.6346	-2.28415	0.692484	-3.29849	0.00097206	0.0104255
421	VIT_219s0014g04130	535.001	-2.28623	0.227202	-10.0626	8.09e-24	1.3e-21
422	VIT_219s0015g00320	1348.11	-2.28908	0.211276	-10.8346	2.36e-27	6.01e-25
423	VIT_217s0000g05360	179.56	-2.28954	0.363057	-6.30628	2.86e-10	1.02e-08
424	VIT_207s0005g01240	116.303	-2.29004	0.493291	-4.64237	3.44e-06	6.64e-05
425	VIT_218s0041g00020	95.296	-2.30256	0.537059	-4.28735	1.81e-05	0.000303963
426	VIT_201s0011g03990	37.5112	-2.30436	0.618699	-3.72451	0.000195691	0.00258036
427	VIT_208s0007g04570	319.384	-2.30674	0.294929	-7.82135	5.23e-15	3.27e-13
428	VIT_203s0132g00380	47.3797	-2.31014	0.450999	-5.12227	3.02e-07	6.97e-06
429	VIT_201s0011g00380	709.19	-2.31389	0.229099	-10.1	5.53e-24	9.09e-22
430	VIT_204s0008g01070	8880.18	-2.31433	0.1944	-11.905	1.11e-32	5.75e-30
431	VIT_203s0038g00760	22281.7	-2.31452	0.221445	-10.4519	1.44e-25	2.77e-23
432	VIT_211s0037g01060	13.7481	-2.31788	0.850474	-2.7254	0.00642243	0.0488023
433	VIT_214s0006g01250	257.612	-2.31955	0.295903	-7.8389	4.55e-15	2.85e-13
434	VIT_210s0003g05450	3795.67	-2.32119	0.23802	-9.75208	1.81e-22	2.5e-20
435	VIT_204s0008g05760	8451.62	-2.32391	0.179297	-12.9612	2.03e-38	2.58e-35
436	VIT_201s0026g00280	2216.33	-2.32604	0.273299	-8.51096	1.73e-17	1.38e-15
437	VIT_207s0197g00170	3484.3	-2.3261	0.179638	-12.9488	2.39e-38	2.73e-35
438	VIT_218s0001g14410	3042.79	-2.33003	0.219316	-10.6241	2.3e-26	5.05e-24
439	VIT_210s0003g00770	24.2116	-2.33229	0.532388	-4.38082	1.18e-05	0.000205086
440	VIT_200s0264g00020	1180.19	-2.33699	0.247204	-9.4537	3.27e-21	3.85e-19
441	VIT_203s0038g03570	181.332	-2.33738	0.326826	-7.15176	8.57e-13	4.25e-11
442	VIT_213s0067g01120	1147.88	-2.33772	0.392199	-5.96053	2.51e-09	8.02e-08
443	VIT_210s0003g00760	1455.55	-2.33819	0.198549	-11.7764	5.17e-32	2.53e-29
444	VIT_218s0041g00030	170.043	-2.33926	0.288588	-8.10588	5.24e-16	3.52e-14
445	VIT_200s2508g00010	45.7456	-2.34262	0.671273	-3.48982	0.000483354	0.00573888
446	VIT_214s0066g02100	241.02	-2.34513	0.27354	-8.57325	1.01e-17	8.49e-16
447	VIT_201s0011g06140	6237.63	-2.3457	0.22975	-10.2098	1.79e-24	3.17e-22
448	VIT_217s0000g07400	88.8636	-2.34753	0.395843	-5.93048	3.02e-09	9.48e-08
449	VIT_204s0008g07150	2102.75	-2.3477	0.273973	-8.56909	1.04e-17	8.77e-16
450	VIT_202s0025g01430	3149.16	-2.34838	0.210375	-11.1628	6.2e-29	1.88e-26
451	VIT_213s0074g00340	24.7256	-2.35124	0.74994	-3.13524	0.00171712	0.0170195
452	VIT_207s0005g00820	1011.38	-2.35284	0.323694	-7.2687	3.63e-13	1.84e-11
453	VIT_212s0057g00420	3619.73	-2.35288	0.167923	-14.0116	1.32e-44	3.61e-41
454	VIT_218s0001g12520	4786	-2.35702	0.350922	-6.71664	1.86e-11	7.75e-10
455	VIT_219s0015g01543	492.507	-2.36093	0.354297	-6.6637	2.67e-11	1.08e-09
456	VIT_216s0039g01870	3357.88	-2.36103	0.235714	-10.0165	1.29e-23	2.02e-21
457	VIT_211s0052g00240	109.381	-2.3615	0.364195	-6.48417	8.92e-11	3.4e-09
458	VIT_212s0028g03550	785.871	-2.36245	0.412774	-5.72336	1.04e-08	2.99e-07
459	VIT_201s0026g00190	809.396	-2.36441	0.280636	-8.42517	3.6e-17	2.68e-15
460	VIT_206s0004g05240	62.8747	-2.36591	0.584584	-4.04716	5.18e-05	0.000791955
461	VIT_200s2539g00010	44.9381	-2.36633	0.601421	-3.93456	8.33e-05	0.00121028
462	VIT_200s0174g00070	148.947	-2.36663	0.44744	-5.28927	1.23e-07	3.06e-06
463	VIT_201s0011g05030	431.718	-2.37038	0.236256	-10.0331	1.09e-23	1.72e-21
464	VIT_215s0045g00810	75.1738	-2.3722	0.464855	-5.1031	3.34e-07	7.65e-06
465	VIT_200s0487g00050	7661.81	-2.38011	0.179597	-13.2525	4.36e-40	6.4e-37
466	VIT_206s0004g01670	74.6006	-2.38201	0.476696	-4.99692	5.83e-07	1.28e-05
467	VIT_203s0063g00880	800.279	-2.38218	0.43518	-5.47401	4.4e-08	1.15e-06
468	VIT_218s0001g02480	275.097	-2.39051	0.317712	-7.52415	5.31e-14	2.93e-12
469	VIT_213s0019g01360	576.086	-2.40101	0.323369	-7.42499	1.13e-13	5.98e-12
470	VIT_204s0008g07250	710.244	-2.40319	0.32532	-7.38716	1.5e-13	7.86e-12
471	VIT_201s0026g01870	63.275	-2.41371	0.37013	-6.52125	6.97e-11	2.69e-09
472	VIT_207s0197g00096	2084.13	-2.4138	0.238255	-10.1311	4.02e-24	6.85e-22
473	VIT_202s0025g04490	202.904	-2.41472	0.284565	-8.48563	2.15e-17	1.67e-15
474	VIT_218s0001g06150	2656.45	-2.41824	0.364323	-6.63763	3.19e-11	1.27e-09
475	VIT_204s0008g00150	67.8379	-2.41929	0.40094	-6.03405	1.6e-09	5.27e-08
476	VIT_215s0024g00400	2032.39	-2.42145	0.236887	-10.2219	1.58e-24	2.85e-22
477	VIT_213s0067g03780	856	-2.42557	0.214939	-11.2849	1.56e-29	5.04e-27
478	VIT_216s0098g00510	479.218	-2.429	0.328523	-7.39368	1.43e-13	7.51e-12
479	VIT_213s0158g00340	2388.61	-2.43038	0.27728	-8.76507	1.87e-18	1.68e-16
480	VIT_200s0187g00040	12.9266	-2.43425	0.842605	-2.88896	0.0038652	0.0329232
481	VIT_218s0001g06240	2323.25	-2.43532	0.232076	-10.4936	9.24e-26	1.88e-23
482	VIT_205s0020g03240	1740.71	-2.43828	0.232785	-10.4744	1.13e-25	2.23e-23
483	VIT_207s0031g00720	786.838	-2.43871	0.655959	-3.71778	0.000200978	0.00263913
484	VIT_212s0034g02530	387.205	-2.44417	0.25171	-9.71025	2.73e-22	3.66e-20
485	VIT_213s0019g01366	300.526	-2.45009	0.347993	-7.04065	1.91e-12	8.99e-11
486	VIT_203s0091g00470	646.961	-2.45458	0.243513	-10.0799	6.78e-24	1.1e-21
487	VIT_207s0129g00180	12176.3	-2.45699	0.170508	-14.4098	4.49e-47	3.11e-43
488	VIT_211s0037g00660	32.4165	-2.45836	0.496687	-4.94952	7.44e-07	1.61e-05
489	VIT_208s0007g07390	6.94604	-2.45978	0.897722	-2.74002	0.00614347	0.047189
490	VIT_204s0008g01550	5462.03	-2.46938	0.446233	-5.53384	3.13e-08	8.37e-07
491	VIT_205s0020g03690	1468.73	-2.47012	0.293842	-8.4063	4.23e-17	3.09e-15
492	VIT_204s0008g07140	87.8664	-2.47205	0.467145	-5.29183	1.21e-07	3.03e-06
493	VIT_218s0122g00690	693.772	-2.47503	0.368591	-6.71484	1.88e-11	7.83e-10
494	VIT_205s0029g00690	181.366	-2.48205	0.334959	-7.41	1.26e-13	6.66e-12
495	VIT_200s0181g00080	1047.64	-2.48824	0.237386	-10.4818	1.05e-25	2.1e-23
496	VIT_218s0001g01960	664.188	-2.49024	0.491919	-5.06229	4.14e-07	9.3e-06
497	VIT_208s0007g01560	2088.25	-2.49038	0.239944	-10.379	3.09e-25	5.84e-23
498	VIT_210s0003g00780	488.466	-2.49159	0.27826	-8.95416	3.42e-19	3.33e-17
499	VIT_218s0001g06180	1516.4	-2.49522	0.457443	-5.45473	4.9e-08	1.28e-06
500	VIT_202s0033g01380	2672.97	-2.49644	0.282863	-8.8256	1.09e-18	9.94e-17
501	VIT_218s0166g00190	1094.36	-2.49998	0.227278	-10.9997	3.84e-28	1.05e-25
502	VIT_200s0743g00030	46.4711	-2.50066	0.601611	-4.15661	3.23e-05	0.000514438
503	VIT_203s0097g00710	2913.86	-2.50272	0.17893	-13.9872	1.87e-44	4.14e-41
504	VIT_210s0003g00790	1944.06	-2.50455	0.206913	-12.1043	1e-33	5.97e-31
505	VIT_201s0026g00900	372.567	-2.51019	0.519582	-4.83116	1.36e-06	2.83e-05
506	VIT_206s0004g04180	1361.22	-2.51141	0.174726	-14.3735	7.6e-47	3.11e-43
507	VIT_201s0010g02940	88.7825	-2.51584	0.53358	-4.71502	2.42e-06	4.8e-05
508	VIT_216s0098g00200	830.463	-2.51819	0.217939	-11.5545	7e-31	2.69e-28
509	VIT_212s0028g01930	14.9939	-2.52346	0.880854	-2.86479	0.00417289	0.034963
510	VIT_209s0054g00910	77.8268	-2.52665	0.433999	-5.82179	5.82e-09	1.74e-07
511	VIT_203s0038g01960	57.0982	-2.52777	0.805108	-3.13967	0.00169141	0.0167909
512	VIT_200s0131g00050	14.8299	-2.52896	0.895939	-2.82269	0.00476227	0.0386327
513	VIT_218s0041g02120	589.553	-2.53085	0.246253	-10.2774	8.91e-25	1.65e-22
514	VIT_211s0052g00100	5222.86	-2.53181	0.284768	-8.89077	6.07e-19	5.7e-17
515	VIT_204s0008g05750	33.2631	-2.53372	0.599098	-4.22922	2.35e-05	0.000384396
516	VIT_214s0066g02470	89.4639	-2.53557	0.492734	-5.14592	2.66e-07	6.25e-06
517	VIT_207s0129g00110	3361.98	-2.53886	0.205814	-12.3357	5.82e-35	4.27e-32
518	VIT_208s0007g01510	983.978	-2.54552	0.276629	-9.20192	3.52e-20	3.65e-18
519	VIT_203s0038g03800	3049.52	-2.55042	0.192263	-13.2653	3.68e-40	5.85e-37
520	VIT_202s0025g03300	3922.71	-2.55636	0.209518	-12.2012	3.06e-34	2.02e-31
521	VIT_210s0071g00190	656.55	-2.55722	0.231727	-11.0355	2.58e-28	7.23e-26
522	VIT_207s0031g02610	23572.7	-2.55957	0.231889	-11.0379	2.51e-28	7.14e-26
523	VIT_212s0028g00610	375.957	-2.56334	0.279453	-9.17272	4.61e-20	4.71e-18
524	VIT_201s0011g00690	7739.23	-2.56698	0.2221	-11.5577	6.75e-31	2.68e-28
525	VIT_207s0031g02400	156.637	-2.56914	0.429107	-5.98718	2.14e-09	6.9e-08
526	VIT_208s0007g01650	1853.48	-2.57124	0.198956	-12.9236	3.31e-38	3.32e-35
527	VIT_213s0019g01130	314.651	-2.58224	0.353145	-7.31213	2.63e-13	1.35e-11
528	VIT_212s0134g00490	403.492	-2.58355	0.366083	-7.05729	1.7e-12	8.1e-11
529	VIT_202s0025g00540	18.2641	-2.58373	0.799742	-3.23071	0.00123485	0.0128328
530	VIT_201s0127g00700	8380.13	-2.5861	0.213128	-12.134	6.97e-34	4.29e-31
531	VIT_203s0132g00050	2918.07	-2.58633	0.276052	-9.36902	7.32e-21	8.12e-19
532	VIT_211s0016g00710	10880.5	-2.58707	0.209909	-12.3248	6.66e-35	4.71e-32
533	VIT_216s0100g01020	124.789	-2.58942	0.724673	-3.57323	0.00035261	0.00433772
534	VIT_200s2563g00010	904.69	-2.59861	0.28356	-9.16421	4.99e-20	5.07e-18
535	VIT_214s0108g01590	16.3504	-2.59981	0.82306	-3.15871	0.00158467	0.0159349
536	VIT_219s0014g01830	157.827	-2.60174	0.341735	-7.61334	2.67e-14	1.53e-12
537	VIT_212s0028g01410	1381.18	-2.60295	0.262865	-9.90221	4.07e-23	5.98e-21
538	VIT_202s0236g00100	697.166	-2.61568	0.345393	-7.57306	3.65e-14	2.07e-12
539	VIT_209s0002g01080	34721.7	-2.61713	0.234109	-11.1791	5.16e-29	1.59e-26
540	VIT_208s0007g05580	1230.6	-2.61813	0.442679	-5.9143	3.33e-09	1.03e-07
541	VIT_203s0017g01990	54.762	-2.62177	0.570907	-4.59229	4.38e-06	8.27e-05
542	VIT_218s0041g00040	53.2663	-2.62196	0.63607	-4.12212	3.75e-05	0.000589517
543	VIT_214s0068g01490	4087.37	-2.62403	0.261533	-10.0333	1.09e-23	1.72e-21
544	VIT_218s0001g02030	35.4424	-2.62443	0.801677	-3.27368	0.00106157	0.0112651
545	VIT_201s0011g01810	51.9985	-2.6246	0.52858	-4.96537	6.86e-07	1.49e-05
546	VIT_212s0134g00480	352.571	-2.62923	0.40329	-6.51944	7.06e-11	2.71e-09
547	VIT_218s0001g06400	296.371	-2.63269	0.355129	-7.41333	1.23e-13	6.51e-12
548	VIT_204s0008g01380	3463.21	-2.6331	0.301549	-8.7319	2.5e-18	2.23e-16
549	VIT_208s0058g00150	2270.22	-2.63584	0.258822	-10.184	2.34e-24	4.09e-22
550	VIT_203s0038g00470	17.9708	-2.63789	0.946653	-2.78655	0.00532726	0.0421457
551	VIT_202s0025g01280	3534.72	-2.63846	0.24358	-10.832	2.43e-27	6.1e-25
552	VIT_218s0001g01300	281.55	-2.63964	0.371636	-7.10276	1.22e-12	5.95e-11
553	VIT_218s0122g01260	659.604	-2.64398	0.228508	-11.5706	5.81e-31	2.41e-28
554	VIT_219s0015g02410	166.341	-2.64574	0.35151	-7.52678	5.2e-14	2.88e-12
555	VIT_211s0052g01460	180.829	-2.64787	0.447226	-5.92067	3.21e-09	1e-07
556	VIT_218s0001g01310	1186.76	-2.65869	0.275738	-9.64207	5.31e-22	6.89e-20
557	VIT_202s0025g04130	5288.85	-2.65921	0.232533	-11.4358	2.77e-30	9.78e-28
558	VIT_217s0000g03380	281.662	-2.66187	0.247519	-10.7542	5.66e-27	1.38e-24
559	VIT_205s0020g04390	892.451	-2.66557	0.283359	-9.40701	5.1e-21	5.81e-19
560	VIT_213s0019g02760	3084.38	-2.6664	0.590686	-4.51408	6.36e-06	0.000116667
561	VIT_204s0008g01500	2647.1	-2.67252	0.662592	-4.03343	5.5e-05	0.000832374
562	VIT_214s0068g02150	188.062	-2.67495	0.398014	-6.72075	1.81e-11	7.58e-10
563	VIT_219s0090g00820	1827	-2.6753	0.6115	-4.37498	1.21e-05	0.000209891
564	VIT_210s0071g00150	404.087	-2.67638	0.284515	-9.40682	5.11e-21	5.81e-19
565	VIT_201s0127g00160	593.266	-2.67767	0.220522	-12.1424	6.29e-34	4e-31
566	VIT_206s0080g00090	2157.29	-2.68286	0.521045	-5.149	2.62e-07	6.17e-06
567	VIT_202s0025g04320	32.3946	-2.68741	0.577675	-4.65212	3.29e-06	6.36e-05
568	VIT_218s0001g09380	470.813	-2.69347	0.233275	-11.5464	7.7e-31	2.88e-28
569	VIT_214s0060g01470	5116.89	-2.69469	0.175022	-15.3963	1.73e-53	3.31e-49
570	VIT_200s0347g00060	19.1731	-2.69918	0.817424	-3.30205	0.000959796	0.0103055
571	VIT_214s0066g02660	53.0325	-2.70446	0.530776	-5.0953	3.48e-07	7.95e-06
572	VIT_213s0019g00480	541.283	-2.70954	0.271664	-9.97385	1.98e-23	3.03e-21
573	VIT_214s0066g01810	1708.24	-2.72584	0.247748	-11.0024	3.72e-28	1.03e-25
574	VIT_213s0156g00580	512.864	-2.73299	0.280097	-9.75729	1.72e-22	2.41e-20
575	VIT_216s0100g00380	2305.56	-2.73598	0.457566	-5.97943	2.24e-09	7.22e-08
576	VIT_209s0002g01680	65.5347	-2.73925	0.530685	-5.16172	2.45e-07	5.8e-06
577	VIT_208s0056g00430	75.2904	-2.73984	0.546547	-5.013	5.36e-07	1.18e-05
578	VIT_207s0031g00500	31.1867	-2.7437	1.00153	-2.73951	0.00615307	0.0472437
579	VIT_212s0034g01910	39.2063	-2.75027	0.940198	-2.92521	0.00344229	0.0299493
580	VIT_212s0034g01350	75.4312	-2.75428	0.324379	-8.49096	2.05e-17	1.61e-15
581	VIT_208s0007g00310	1647.96	-2.75706	0.455679	-6.05044	1.44e-09	4.78e-08
582	VIT_218s0001g06610	970.107	-2.75715	0.238078	-11.5809	5.15e-31	2.18e-28
583	VIT_200s0269g00180	41.2959	-2.77449	0.846417	-3.27793	0.00104573	0.0111156
584	VIT_211s0016g04490	1085.11	-2.77844	0.221091	-12.5669	3.21e-36	2.55e-33
585	VIT_203s0063g01780	2292.41	-2.79691	0.219602	-12.7363	3.72e-37	3.08e-34
586	VIT_202s0087g00330	11.5133	-2.79856	0.868841	-3.22103	0.00127733	0.0132166
587	VIT_202s0025g04280	171.509	-2.7997	0.397644	-7.04071	1.91e-12	8.99e-11
588	VIT_218s0001g03410	11.11	-2.80826	0.896766	-3.13154	0.00173892	0.017191
589	VIT_216s0039g01170	262.796	-2.81079	0.877808	-3.20206	0.0013645	0.0139746
590	VIT_209s0002g03920	14.204	-2.81387	0.912349	-3.0842	0.00204099	0.0196281
591	VIT_204s0008g03530	328.02	-2.81633	0.295537	-9.52954	1.58e-21	1.94e-19
592	VIT_201s0011g05580	1710.96	-2.82015	0.25433	-11.0886	1.43e-28	4.18e-26
593	VIT_203s0017g00650	2983.97	-2.82033	0.238673	-11.8167	3.2e-32	1.61e-29
594	VIT_201s0010g02930	70.8196	-2.8206	0.495982	-5.68689	1.29e-08	3.65e-07
595	VIT_200s0240g00050	25.6605	-2.82361	0.991813	-2.84692	0.00441451	0.0364154
596	VIT_205s0020g04280	86.1611	-2.84422	0.65014	-4.37478	1.22e-05	0.000209891
597	VIT_205s0020g03210	690.97	-2.84493	0.27192	-10.4624	1.29e-25	2.5e-23
598	VIT_218s0001g11950	426.799	-2.86526	0.344697	-8.31242	9.38e-17	6.63e-15
599	VIT_207s0129g01010	33.4292	-2.86758	0.658826	-4.35256	1.35e-05	0.000231292
600	VIT_208s0007g04790	1439.38	-2.87529	0.392505	-7.32548	2.38e-13	1.23e-11
601	VIT_218s0001g03810	929.082	-2.87541	0.200117	-14.3687	8.14e-47	3.11e-43
602	VIT_200s0207g00180	24.878	-2.8755	0.73144	-3.93129	8.45e-05	0.00122502
603	VIT_216s0039g02020	2418.9	-2.89108	0.355524	-8.13189	4.23e-16	2.88e-14
604	VIT_207s0197g00090	4742.23	-2.89469	0.208446	-13.887	7.6e-44	1.45e-40
605	VIT_210s0003g02030	1292.31	-2.90069	0.207431	-13.9839	1.95e-44	4.14e-41
606	VIT_205s0020g04300	564.834	-2.90103	0.307657	-9.42944	4.12e-21	4.77e-19
607	VIT_206s0004g03540	2645.26	-2.90669	0.250769	-11.5911	4.57e-31	1.98e-28
608	VIT_210s0003g03800	62.2455	-2.90844	0.772918	-3.76294	0.00016793	0.00225482
609	VIT_218s0001g02690	105.596	-2.91127	0.863172	-3.37275	0.000744207	0.0083135
610	VIT_203s0088g01180	1410.67	-2.9119	0.441642	-6.59336	4.3e-11	1.69e-09
611	VIT_209s0018g00240	4311.98	-2.91473	0.259771	-11.2203	3.24e-29	1.03e-26
612	VIT_210s0071g00300	1084.84	-2.91529	0.398531	-7.31508	2.57e-13	1.33e-11
613	VIT_206s0080g00450	1586.17	-2.92258	0.269612	-10.8399	2.23e-27	5.74e-25
614	VIT_203s0038g03530	8109.93	-2.92655	0.273672	-10.6937	1.09e-26	2.51e-24
615	VIT_213s0067g02630	419.959	-2.93273	0.278983	-10.5122	7.59e-26	1.59e-23
616	VIT_216s0050g01240	967.015	-2.933	0.30937	-9.48057	2.53e-21	3e-19
617	VIT_217s0000g03370	637.918	-2.94259	0.428816	-6.86213	6.78e-12	2.96e-10
618	VIT_216s0098g00190	346.331	-2.98115	0.283649	-10.51	7.77e-26	1.59e-23
619	VIT_207s0141g00360	1171.57	-2.98434	0.322682	-9.24856	2.28e-20	2.37e-18
620	VIT_213s0067g03130	48.2546	-2.99247	0.491817	-6.08452	1.17e-09	3.89e-08
621	VIT_216s0039g01110	402.321	-2.9941	0.533011	-5.61732	1.94e-08	5.36e-07
622	VIT_202s0087g00710	574.727	-3.00371	0.50738	-5.92005	3.22e-09	1e-07
623	VIT_200s0409g00010	112.24	-3.01416	0.372748	-8.08631	6.15e-16	4.12e-14
624	VIT_214s0128g00780	1495.77	-3.02367	0.261587	-11.5589	6.65e-31	2.68e-28
625	VIT_204s0008g00800	2537.85	-3.02659	0.210125	-14.4038	4.9e-47	3.11e-43
626	VIT_201s0026g01730	314.004	-3.03025	0.326763	-9.27353	1.8e-20	1.91e-18
627	VIT_203s0132g00090	73.9673	-3.03141	0.520217	-5.82721	5.64e-09	1.69e-07
628	VIT_218s0041g00700	243.362	-3.03322	0.310303	-9.77502	1.44e-22	2.05e-20
629	VIT_211s0052g01260	160.034	-3.03545	0.383375	-7.9177	2.42e-15	1.58e-13
630	VIT_200s0748g00020	104.215	-3.04447	0.451523	-6.74268	1.55e-11	6.55e-10
631	VIT_211s0016g05550	79.5446	-3.05606	0.497938	-6.13742	8.39e-10	2.84e-08
632	VIT_201s0010g00800	19.2271	-3.06074	0.719067	-4.25654	2.08e-05	0.000343267
633	VIT_218s0001g10870	13.8496	-3.06417	0.924792	-3.31336	0.00092181	0.00995367
634	VIT_208s0040g01930	164.26	-3.06653	0.367751	-8.33861	7.52e-17	5.39e-15
635	VIT_216s0100g00400	1171.89	-3.07466	0.436261	-7.04776	1.82e-12	8.63e-11
636	VIT_212s0028g01720	266.658	-3.07985	0.489421	-6.29284	3.12e-10	1.11e-08
637	VIT_200s0404g00100	80.9372	-3.10449	0.807794	-3.84317	0.000121453	0.00168944
638	VIT_200s0288g00070	15.7005	-3.11024	1.01879	-3.05287	0.00226665	0.0213878
639	VIT_214s0128g00790	696.235	-3.11307	0.240443	-12.9473	2.44e-38	2.73e-35
640	VIT_211s0016g00670	451.038	-3.12124	0.410491	-7.60366	2.88e-14	1.64e-12
641	VIT_200s0424g00030	41.2955	-3.1256	0.64704	-4.83062	1.36e-06	2.83e-05
642	VIT_206s0004g05660	34.107	-3.12587	0.956551	-3.26786	0.00108365	0.0114422
643	VIT_203s0038g03430	770.962	-3.1311	0.294556	-10.6299	2.16e-26	4.8e-24
644	VIT_206s0004g01580	71.1598	-3.14289	0.468382	-6.71011	1.94e-11	8.05e-10
645	VIT_210s0042g00600	17.5454	-3.14649	0.989291	-3.18055	0.00146993	0.0149341
646	VIT_216s0039g01100	950.986	-3.14856	0.487284	-6.46146	1.04e-10	3.93e-09
647	VIT_207s0031g01070	76.5222	-3.14911	0.553412	-5.69035	1.27e-08	3.59e-07
648	VIT_201s0026g02470	1523.03	-3.15726	0.246203	-12.8238	1.21e-37	1.1e-34
649	VIT_216s0050g02510	788.618	-3.15796	0.300462	-10.5103	7.74e-26	1.59e-23
650	VIT_201s0011g02360	110.306	-3.16176	0.568012	-5.56636	2.6e-08	7.05e-07
651	VIT_218s0001g11680	1221.39	-3.16544	0.29562	-10.7078	9.35e-27	2.2e-24
652	VIT_206s0080g00780	1504.29	-3.1669	0.271746	-11.6539	2.19e-31	9.73e-29
653	VIT_218s0001g03620	662.406	-3.17159	0.288742	-10.9842	4.55e-28	1.22e-25
654	VIT_202s0012g02190	3590.19	-3.17585	0.423483	-7.49936	6.41e-14	3.54e-12
655	VIT_210s0042g00700	523.437	-3.20908	0.345745	-9.28164	1.67e-20	1.78e-18
656	VIT_206s0009g03540	260.748	-3.20948	0.288241	-11.1347	8.5e-29	2.53e-26
657	VIT_208s0058g00690	3650.63	-3.22046	0.252633	-12.7476	3.22e-37	2.79e-34
658	VIT_204s0069g00200	12.5489	-3.22878	0.819182	-3.94147	8.1e-05	0.00117773
659	VIT_201s0244g00090	367.314	-3.23464	0.418019	-7.73803	1.01e-14	6.06e-13
660	VIT_202s0012g01960	1722.11	-3.24828	0.251322	-12.9248	3.26e-38	3.32e-35
661	VIT_216s0098g00210	57.9172	-3.26381	0.638701	-5.11007	3.22e-07	7.4e-06
662	VIT_209s0002g04560	334.512	-3.28413	0.324785	-10.1117	4.9e-24	8.21e-22
663	VIT_216s0100g00900	483.952	-3.29119	0.725096	-4.53897	5.65e-06	0.00010421
664	VIT_208s0040g00480	6.5699	-3.29641	1.14476	-2.87957	0.00398214	0.0336787
665	VIT_208s0058g01160	91.0957	-3.2988	0.564626	-5.84246	5.14e-09	1.57e-07
666	VIT_201s0010g03020	118.157	-3.31262	0.748219	-4.42734	9.54e-06	0.000167919
667	VIT_219s0140g00120	2032.38	-3.31383	0.462317	-7.16787	7.62e-13	3.79e-11
668	VIT_217s0000g03390	1685.1	-3.3198	0.372464	-8.91307	4.96e-19	4.76e-17
669	VIT_201s0146g00480	403.344	-3.3234	0.593868	-5.59619	2.19e-08	6.02e-07
670	VIT_218s0001g01500	28.0965	-3.3237	0.647388	-5.13401	2.84e-07	6.6e-06
671	VIT_215s0046g02170	112.558	-3.32415	0.561375	-5.92145	3.19e-09	9.98e-08
672	VIT_211s0016g04750	73.3591	-3.32514	0.624377	-5.32553	1.01e-07	2.53e-06
673	VIT_214s0006g02083	59.0936	-3.35739	0.538434	-6.23547	4.5e-10	1.59e-08
674	VIT_206s0061g01390	2090.69	-3.35889	0.451433	-7.44052	1e-13	5.38e-12
675	VIT_212s0059g01720	76.9328	-3.35964	0.435835	-7.70852	1.27e-14	7.61e-13
676	VIT_218s0001g04640	75.6609	-3.3621	0.547682	-6.13878	8.32e-10	2.82e-08
677	VIT_201s0011g00740	18.2667	-3.36528	0.961647	-3.49949	0.000466147	0.00556228
678	VIT_219s0015g02415	14.2896	-3.36608	0.997068	-3.37598	0.000735541	0.00823115
679	VIT_205s0020g04330	365.972	-3.36688	0.584125	-5.76396	8.22e-09	2.39e-07
680	VIT_211s0016g01970	623.423	-3.36763	0.349886	-9.62493	6.28e-22	8.04e-20
681	VIT_207s0005g05780	79.0129	-3.37927	0.593201	-5.69667	1.22e-08	3.47e-07
682	VIT_207s0104g00350	91.4793	-3.38024	0.883115	-3.82763	0.000129384	0.00178758
683	VIT_216s0148g00370	36.0742	-3.38951	0.60071	-5.6425	1.68e-08	4.7e-07
684	VIT_213s0073g00186	22.7529	-3.3917	0.743339	-4.56278	5.05e-06	9.38e-05
685	VIT_211s0016g02070	395.751	-3.39208	0.504859	-6.71887	1.83e-11	7.66e-10
686	VIT_205s0049g01020	321.731	-3.39973	0.510876	-6.65471	2.84e-11	1.15e-09
687	VIT_200s0258g00130	14.3812	-3.40214	0.875949	-3.88395	0.000102774	0.00146557
688	VIT_217s0000g04360	135.457	-3.42307	0.45834	-7.46842	8.12e-14	4.4e-12
689	VIT_216s0050g00410	267.304	-3.4261	0.37823	-9.05823	1.33e-19	1.31e-17
690	VIT_205s0029g00926	8.17297	-3.43413	1.019	-3.37011	0.000751394	0.00837419
691	VIT_203s0063g01560	107.736	-3.45512	1.22743	-2.81492	0.00487889	0.0393279
692	VIT_201s0010g02270	20.6363	-3.47622	0.90412	-3.84487	0.000120617	0.00168229
693	VIT_205s0020g03710	731.482	-3.48035	0.491932	-7.07485	1.5e-12	7.19e-11
694	VIT_216s0050g02400	441.664	-3.48279	0.89476	-3.89243	9.92e-05	0.00141843
695	VIT_207s0151g00640	37.258	-3.48972	1.16994	-2.98283	0.00285601	0.0257771
696	VIT_212s0055g01010	44.7837	-3.52164	1.25515	-2.80576	0.00501988	0.0403622
697	VIT_204s0069g00970	68.0185	-3.52568	0.585684	-6.01977	1.75e-09	5.73e-08
698	VIT_201s0011g02790	18.1413	-3.53098	0.730601	-4.83298	1.35e-06	2.81e-05
699	VIT_218s0001g11430	13.0425	-3.53127	1.11285	-3.17318	0.00150777	0.0152828
700	VIT_208s0007g02940	61.3474	-3.54331	0.588774	-6.01812	1.76e-09	5.77e-08
701	VIT_200s0347g00080	9.38621	-3.56827	1.23159	-2.89729	0.00376403	0.0322053
702	VIT_207s0031g01130	897.493	-3.57099	0.309072	-11.5539	7.05e-31	2.69e-28
703	VIT_211s0052g01300	71.131	-3.57602	0.600773	-5.95237	2.64e-09	8.36e-08
704	VIT_218s0041g01770	16.4798	-3.58502	0.782755	-4.58	4.65e-06	8.73e-05
705	VIT_208s0007g07190	200.168	-3.61472	0.411105	-8.79269	1.46e-18	1.32e-16
706	VIT_207s0005g03260	119.623	-3.62844	0.878286	-4.13128	3.61e-05	0.000569328
707	VIT_214s0060g02320	686.457	-3.64387	0.671835	-5.42376	5.84e-08	1.5e-06
708	VIT_201s0127g00480	5.29986	-3.65544	1.32487	-2.7591	0.00579611	0.0449991
709	VIT_204s0008g07170	21.8538	-3.68961	0.889112	-4.14977	3.33e-05	0.000527842
710	VIT_211s0052g01180	61.7052	-3.69356	0.744914	-4.95837	7.11e-07	1.54e-05
711	VIT_206s0009g03470	20.3778	-3.70649	1.01034	-3.66856	0.000243921	0.00314036
712	VIT_214s0006g01925	9.07886	-3.7133	1.05714	-3.5126	0.000443753	0.00530502
713	VIT_200s2659g00010	18.7194	-3.72707	1.01311	-3.67883	0.000234304	0.00303911
714	VIT_203s0097g00130	10.5931	-3.7306	0.933001	-3.99849	6.37e-05	0.000953954
715	VIT_216s0100g00990	36.6012	-3.73076	0.939701	-3.97015	7.18e-05	0.00105663
716	VIT_203s0017g00900	11.2656	-3.76069	1.19286	-3.15266	0.00161789	0.0162129
717	VIT_203s0038g01650	9.79084	-3.7726	1.32247	-2.85269	0.00433508	0.035978
718	VIT_201s0010g00760	28.1508	-3.80318	0.741521	-5.12889	2.91e-07	6.77e-06
719	VIT_211s0052g01200	96.0123	-3.82359	0.575197	-6.64745	2.98e-11	1.19e-09
720	VIT_202s0025g04360	10.0759	-3.83352	1.32062	-2.90283	0.00369807	0.0317405
721	VIT_216s0098g00220	404.45	-3.87817	0.289918	-13.3768	8.27e-41	1.43e-37
722	VIT_216s0100g01010	183.951	-3.87891	0.795971	-4.87319	1.1e-06	2.32e-05
723	VIT_218s0041g01310	15.0184	-3.91033	1.23212	-3.17367	0.00150526	0.0152687
724	VIT_216s0039g01120	191.374	-3.94882	0.408672	-9.66255	4.35e-22	5.68e-20
725	VIT_204s0023g01715	29.8306	-3.9641	1.0291	-3.85203	0.000117143	0.00164225
726	VIT_206s0004g00020	1846.24	-3.99194	0.520478	-7.66977	1.72e-14	1.01e-12
727	VIT_216s0100g00940	320.536	-4.01165	1.25422	-3.19852	0.00138137	0.0141322
728	VIT_201s0011g05020	28.0609	-4.04034	1.38603	-2.91505	0.0035563	0.0307869
729	VIT_203s0063g00700	140.966	-4.05565	1.25406	-3.23401	0.00122067	0.0127131
730	VIT_210s0003g03810	256.462	-4.0978	0.476857	-8.59336	8.45e-18	7.16e-16
731	VIT_205s0020g04780	3761.09	-4.11214	0.633146	-6.49477	8.32e-11	3.19e-09
732	VIT_216s0100g01000	24.3809	-4.12851	0.902249	-4.5758	4.74e-06	8.87e-05
733	VIT_206s0009g00370	51.9429	-4.13512	0.662887	-6.23805	4.43e-10	1.56e-08
734	VIT_204s0044g01300	66.9323	-4.14885	1.02032	-4.06621	4.78e-05	0.000736456
735	VIT_217s0000g05270	25.6739	-4.16753	1.39265	-2.99252	0.00276683	0.0251296
736	VIT_210s0116g00710	78.0615	-4.17426	1.30205	-3.20591	0.00134636	0.0138259
737	VIT_210s0042g00930	138.031	-4.1759	1.05024	-3.97614	7e-05	0.00103678
738	VIT_203s0038g01390	10.7905	-4.18034	1.45137	-2.88028	0.00397325	0.0336333
739	VIT_207s0005g01360	240.775	-4.18702	0.471076	-8.88821	6.21e-19	5.81e-17
740	VIT_216s0100g00860	618.374	-4.20241	0.705106	-5.95997	2.52e-09	8.04e-08
741	VIT_216s0100g00810	376.832	-4.2458	0.742832	-5.7157	1.09e-08	3.12e-07
742	VIT_215s0024g01670	62.4287	-4.2666	0.758493	-5.6251	1.85e-08	5.15e-07
743	VIT_219s0090g00600	31.9419	-4.26773	0.762597	-5.59631	2.19e-08	6.02e-07
744	VIT_216s0100g01040	66.4754	-4.28948	0.736838	-5.82146	5.83e-09	1.74e-07
745	VIT_208s0007g00750	22.7916	-4.3207	1.51899	-2.84446	0.00444871	0.0366817
746	VIT_208s0032g01220	2547.99	-4.33921	0.408806	-10.6143	2.56e-26	5.54e-24
747	VIT_216s0100g00880	30.0596	-4.34038	0.799457	-5.42916	5.66e-08	1.46e-06
748	VIT_215s0046g03430	28.3222	-4.40288	0.869233	-5.06525	4.08e-07	9.19e-06
749	VIT_211s0052g01320	32.2541	-4.40783	0.793656	-5.55383	2.79e-08	7.55e-07
750	VIT_202s0025g04420	4054.93	-4.41728	0.438128	-10.0822	6.62e-24	1.08e-21
751	VIT_211s0052g01330	82.3957	-4.44741	0.624936	-7.11658	1.11e-12	5.4e-11
752	VIT_212s0057g00613	149.749	-4.47981	0.571342	-7.84087	4.47e-15	2.82e-13
753	VIT_218s0089g01270	673.88	-4.48362	1.43997	-3.1137	0.0018476	0.0180873
754	VIT_216s0100g00930	371.92	-4.49495	0.698889	-6.43156	1.26e-10	4.75e-09
755	VIT_211s0052g01190	552.102	-4.51163	0.319634	-14.115	3.07e-45	9.77e-42
756	VIT_206s0004g01570	11.1677	-4.51776	1.33937	-3.37306	0.000743383	0.00830917
757	VIT_200s0226g00100	13.4661	-4.52694	1.0738	-4.21582	2.49e-05	0.000406549
758	VIT_218s0001g03400	26.0828	-4.545	1.08201	-4.20051	2.66e-05	0.000431343
759	VIT_204s0069g00210	13.5763	-4.55871	1.24554	-3.66003	0.000252186	0.0032315
760	VIT_201s0026g00950	6.75994	-4.59874	1.48533	-3.0961	0.00196087	0.0189525
761	VIT_214s0066g00430	41.7808	-4.60648	1.42633	-3.2296	0.00123964	0.0128686
762	VIT_218s0001g09350	12.8464	-4.61222	1.57024	-2.93727	0.00331118	0.029047
763	VIT_211s0052g01280	63.7629	-4.62264	0.637127	-7.25544	4e-13	2.02e-11
764	VIT_215s0046g03500	38.1928	-4.68496	0.697519	-6.71661	1.86e-11	7.75e-10
765	VIT_210s0042g00920	152.573	-4.691	1.08735	-4.31416	1.6e-05	0.000271233
766	VIT_213s0084g00315	44.6747	-4.74433	1.3057	-3.63354	0.000279556	0.00353475
767	VIT_218s0001g00680	8.11	-4.76997	1.75465	-2.71848	0.00655834	0.0495577
768	VIT_203s0091g00310	523.527	-4.77107	0.798038	-5.9785	2.25e-09	7.25e-08
769	VIT_216s0100g00840	40.354	-4.82151	1.39369	-3.45953	0.000541109	0.00633008
770	VIT_218s0001g13510	27.3869	-4.8259	1.22077	-3.95318	7.71e-05	0.00112841
771	VIT_204s0008g01510	2783.11	-4.8604	1.41179	-3.44273	0.000575873	0.00665964
772	VIT_219s0085g01050	2321.19	-4.86547	0.842644	-5.77406	7.74e-09	2.26e-07
773	VIT_218s0001g04660	22.6942	-4.892	1.44394	-3.38796	0.000704157	0.0079358
774	VIT_204s0008g01520	3000.34	-4.92686	1.44645	-3.40617	0.000658816	0.00749119
775	VIT_215s0024g01700	37.2082	-4.92696	0.779638	-6.31955	2.62e-10	9.42e-09
776	VIT_200s0463g00025	16.3291	-4.93533	1.35921	-3.63102	0.000282306	0.00356008
777	VIT_208s0007g08000	8.67737	-4.94471	1.72854	-2.86063	0.00422806	0.0352586
778	VIT_212s0055g01030	86.3196	-4.94542	0.638264	-7.74824	9.32e-15	5.7e-13
779	VIT_208s0007g05840	8.38162	-4.99972	1.265	-3.95234	7.74e-05	0.00113151
780	VIT_218s0089g01150	54.4496	-5.03214	1.68766	-2.98173	0.00286625	0.0258451
781	VIT_201s0010g03670	73.1967	-5.05626	1.31567	-3.84311	0.000121484	0.00168944
782	VIT_212s0057g00620	7.4207	-5.06992	1.61083	-3.1474	0.0016473	0.0164385
783	VIT_204s0008g07220	15.2396	-5.12395	1.74672	-2.93347	0.00335201	0.0293243
784	VIT_216s0100g00850	195.016	-5.16541	1.14573	-4.50841	6.53e-06	0.000119713
785	VIT_218s0001g08820	12.7188	-5.2131	1.35602	-3.84441	0.000120845	0.00168424
786	VIT_210s0116g00140	10.9865	-5.3058	1.42906	-3.7128	0.000204982	0.00268801
787	VIT_212s0057g00510	101.581	-5.32413	1.25515	-4.24185	2.22e-05	0.000364954
788	VIT_205s0062g00710	91.3359	-5.33764	1.68986	-3.15863	0.00158514	0.0159349
789	VIT_213s0019g03050	872.363	-5.36194	1.20149	-4.46274	8.09e-06	0.000145104
790	VIT_218s0041g02010	30.1421	-5.36984	1.08108	-4.96712	6.8e-07	1.48e-05
791	VIT_209s0002g02760	181.585	-5.4645	0.454545	-12.0219	2.73e-33	1.53e-30
792	VIT_201s0010g03040	44.6992	-5.51017	1.37514	-4.007	6.15e-05	0.000924606
793	VIT_200s1557g00010	4.38557	-5.52342	1.93031	-2.86141	0.00421761	0.0352484
794	VIT_212s0059g01500	4.95895	-5.52865	1.75788	-3.14507	0.00166045	0.0165523
795	VIT_219s0014g02120	35.6549	-5.5333	0.790209	-7.00233	2.52e-12	1.18e-10
796	VIT_216s0050g02230	9.43212	-5.5739	1.52894	-3.6456	0.000266768	0.00339382
797	VIT_214s0108g00690	64.5589	-5.63078	1.34298	-4.19276	2.76e-05	0.000444841
798	VIT_215s0046g03420	5.12183	-5.74497	1.62334	-3.53899	0.000401665	0.00487207
799	VIT_204s0069g00060	10.1431	-5.75248	1.81488	-3.16963	0.00152635	0.0154333
800	VIT_218s0041g02210	12.3005	-5.77293	1.37195	-4.20784	2.58e-05	0.000418409
801	VIT_213s0064g01370	3.06444	-5.89667	2.05737	-2.86612	0.0041554	0.0348812
802	VIT_218s0117g00290	7.24561	-5.92343	1.79198	-3.30551	0.000948023	0.0102021
803	VIT_217s0000g06480	5.69656	-6.02643	2.01385	-2.99249	0.00276715	0.0251296
804	VIT_200s2849g00010	29.0258	-6.03253	1.83611	-3.2855	0.00101802	0.0108453
805	VIT_216s0148g00420	4.43307	-6.03578	2.0422	-2.95553	0.00312135	0.027713
806	VIT_207s0031g00705	71.5771	-6.03861	1.81978	-3.31831	0.000905643	0.00980684
807	VIT_205s0020g03680	7.3659	-6.05955	1.69188	-3.58155	0.000341563	0.00422634
808	VIT_211s0016g02800	21.7188	-6.07105	1.35517	-4.47991	7.47e-06	0.000135438
809	VIT_212s0059g00210	5.4556	-6.2185	1.66734	-3.7296	0.000191782	0.00253232
810	VIT_205s0165g00090	8.41037	-6.23709	1.60198	-3.89336	9.89e-05	0.00141618
811	VIT_201s0010g01970	68.1313	-6.23802	1.49401	-4.17537	2.98e-05	0.000476212
812	VIT_210s0042g00840	50.5898	-6.26858	0.905129	-6.92563	4.34e-12	1.95e-10
813	VIT_218s0041g02070	17.5746	-6.27629	1.44164	-4.35357	1.34e-05	0.000230436
814	VIT_210s0003g04200	3.33001	-6.31447	2.20827	-2.85946	0.0042436	0.0353541
815	VIT_210s0003g00700	3.97908	-6.44356	2.09551	-3.07493	0.0021055	0.0200965
816	VIT_201s0011g03090	1067.54	-6.45558	1.37406	-4.69819	2.62e-06	5.16e-05
817	VIT_210s0042g00910	7.46051	-6.45571	1.67786	-3.84759	0.000119286	0.00166495
818	VIT_212s0035g01910	4721.88	-6.5777	1.25449	-5.24332	1.58e-07	3.86e-06
819	VIT_200s0288g00020	4.81483	-6.9802	1.99726	-3.49489	0.000474265	0.00564854
820	VIT_211s0052g01270	23.5685	-6.98512	1.44602	-4.83058	1.36e-06	2.83e-05
821	VIT_212s0055g01020	38.4549	-7.03753	1.35579	-5.19071	2.09e-07	5.02e-06
822	VIT_202s0025g04440	11.5696	-7.19659	1.42533	-5.04907	4.44e-07	9.95e-06
823	VIT_200s0409g00050	9.74019	-7.42423	1.57089	-4.72614	2.29e-06	4.57e-05
824	VIT_201s0010g02990	14.5139	-7.44312	1.51537	-4.91174	9.03e-07	1.94e-05
825	VIT_208s0056g00630	4.45095	-7.53249	2.16412	-3.48062	0.00050026	0.00591385
826	VIT_218s0001g14420	157.7	-7.56828	1.22808	-6.16268	7.15e-10	2.45e-08
827	VIT_207s0005g03220	22.1086	-7.7287	1.38013	-5.6	2.14e-08	5.9e-07
828	VIT_218s0041g02260	228.548	-8.06152	1.55576	-5.18172	2.2e-07	5.24e-06
829	VIT_215s0021g01630	28.9546	-8.37251	1.39957	-5.98221	2.2e-09	7.11e-08
830	VIT_210s0042g00890	49.4223	-9.15465	1.2839	-7.13033	1e-12	4.94e-11

## Sheet: R4-R3
	GENE ID	base Mean	log2FoldChange	lfcSE	Stat	P value	P adj
1	VIT_212s0035g01910	4721.88	9.02636	1.24299	7.26178	3.82e-13	5.51e-11
2	VIT_204s0008g01510	2783.11	6.64586	1.38467	4.79959	1.59e-06	6.34e-05
3	VIT_214s0068g02080	10.8941	6.04545	1.59943	3.77976	0.000156981	0.00343995
4	VIT_218s0041g02260	228.548	6.00883	1.57644	3.81165	0.000138041	0.00306009
5	VIT_207s0151g00680	11.561	5.51802	1.60526	3.43745	0.000587213	0.00998552
6	VIT_202s0154g00490	398.069	5.41613	1.32599	4.08461	4.42e-05	0.00115833
7	VIT_219s0085g01050	2321.19	5.20049	0.843555	6.16497	7.05e-10	5.52e-08
8	VIT_208s0007g07490	21.2307	5.06019	1.35517	3.73398	0.000188477	0.00402726
9	VIT_204s0008g01520	3000.34	4.75889	1.46866	3.2403	0.00119405	0.0171443
10	VIT_207s0129g00760	67.5756	4.71232	1.38581	3.40042	0.000672835	0.0110792
11	VIT_218s0089g01270	673.88	4.66237	1.45176	3.21154	0.00132026	0.0185377
12	VIT_208s0058g00210	160.338	4.64943	1.53523	3.02848	0.00245788	0.0300801
13	VIT_214s0060g01960	9.88913	4.62924	1.62681	2.84559	0.00443295	0.0465202
14	VIT_204s0008g01580	8322.66	4.60238	0.660602	6.96695	3.24e-12	3.91e-10
15	VIT_212s0134g00040	3112.23	4.59718	0.413382	11.1209	9.93e-29	1e-25
16	VIT_202s0087g00586	9.24316	4.55866	1.52932	2.98085	0.00287454	0.0339212
17	VIT_200s0179g00150	9484.71	4.54573	0.268676	16.919	3.26e-64	2.79e-60
18	VIT_202s0025g00280	58441.1	4.2947	0.368927	11.6411	2.55e-31	3.12e-28
19	VIT_216s0050g01150	44631.2	4.21902	0.330955	12.748	3.2e-37	6.1e-34
20	VIT_200s0220g00150	26.4911	4.21593	1.40316	3.00459	0.00265939	0.0318643
21	VIT_213s0019g03160	767.474	4.17476	1.05204	3.96825	7.24e-05	0.00174479
22	VIT_203s0063g00700	140.966	4.15937	1.26088	3.29878	0.000971044	0.0148919
23	VIT_202s0087g00280	21.0157	4.09902	1.25682	3.26143	0.00110854	0.0163404
24	VIT_204s0044g01300	66.9323	4.01135	1.02964	3.89587	9.78e-05	0.00227483
25	VIT_214s0108g00590	3058.16	3.93437	0.265997	14.791	1.67e-49	5.74e-46
26	VIT_218s0001g11430	13.0425	3.90051	1.11372	3.50225	0.000461353	0.00827157
27	VIT_204s0008g01110	14388.4	3.87767	0.246144	15.7536	6.48e-56	3.71e-52
28	VIT_200s0347g00080	9.38621	3.82956	1.23424	3.10278	0.00191712	0.0248631
29	VIT_217s0000g07190	47314	3.78589	0.345989	10.9422	7.24e-28	6.9e-25
30	VIT_218s0001g12040	10.2191	3.78367	1.2516	3.02307	0.0025022	0.0304704
31	VIT_204s0008g01490	6681.66	3.68236	0.40265	9.14531	5.95e-20	2.32e-17
32	VIT_205s0020g00480	105.627	3.60423	0.659075	5.46863	4.54e-08	2.53e-06
33	VIT_214s0060g01490	968.561	3.56819	0.296677	12.0272	2.56e-33	3.99e-30
34	VIT_201s0011g04820	1904.44	3.48334	0.510674	6.82106	9.04e-12	9.81e-10
35	VIT_203s0063g00370	951.443	3.4629	0.568917	6.08683	1.15e-09	8.59e-08
36	VIT_204s0008g01530	3074.28	3.45068	0.873386	3.95093	7.78e-05	0.00186036
37	VIT_201s0010g02290	6246.83	3.40361	0.365659	9.30816	1.3e-20	5.58e-18
38	VIT_201s0146g00150	22203.4	3.37705	0.391255	8.63133	6.06e-18	1.76e-15
39	VIT_201s0146g00340	34.7465	3.37111	0.773584	4.35778	1.31e-05	0.000409135
40	VIT_203s0088g01130	9.975	3.35117	1.15406	2.9038	0.00368667	0.040863
41	VIT_205s0102g00620	258.525	3.34958	0.380046	8.81362	1.21e-18	3.65e-16
42	VIT_205s0077g00635	44.5203	3.33384	1.01461	3.28584	0.00101678	0.0153168
43	VIT_213s0019g02740	4985.86	3.29472	0.45755	7.20079	5.99e-13	8.28e-11
44	VIT_216s0050g00070	14.346	3.25568	0.893999	3.64171	0.000270837	0.00535845
45	VIT_207s0005g01080	84.2779	3.22849	0.834337	3.86953	0.000109046	0.00250541
46	VIT_204s0008g01570	5971.28	3.20128	0.95122	3.36544	0.000764213	0.0121597
47	VIT_213s0047g00050	29.0199	3.17601	1.03431	3.07067	0.00213581	0.0270452
48	VIT_204s0008g01500	2647.1	3.14211	0.6625	4.74282	2.11e-06	8.24e-05
49	VIT_207s0005g01980	1689.79	3.13737	0.390156	8.04132	8.89e-16	1.84e-13
50	VIT_213s0019g02930	8135.15	3.11059	0.290022	10.7254	7.74e-27	6.64e-24
51	VIT_213s0047g00110	888.787	3.09092	0.348792	8.86176	7.88e-19	2.5e-16
52	VIT_207s0005g01970	2903.2	3.08068	0.23933	12.8721	6.46e-38	1.39e-34
53	VIT_213s0019g02780	20954.3	3.0499	0.268686	11.3511	7.32e-30	7.85e-27
54	VIT_204s0008g01550	5462.03	3.04943	0.445443	6.84582	7.6e-12	8.53e-10
55	VIT_218s0001g12880	64.9531	3.04803	0.649205	4.69501	2.67e-06	0.00010053
56	VIT_213s0019g02760	3084.38	3.02647	0.591183	5.11934	3.07e-07	1.42e-05
57	VIT_218s0001g07440	19.7435	2.95951	0.898833	3.29262	0.000992598	0.015085
58	VIT_213s0019g02850	3372.26	2.89196	0.289879	9.97645	1.93e-23	1.18e-20
59	VIT_205s0029g00802	17.0267	2.84487	0.767786	3.70529	0.000211148	0.00443759
60	VIT_213s0019g03000	2912.18	2.79248	0.304111	9.18247	4.21e-20	1.68e-17
61	VIT_205s0020g03330	2397.02	2.78222	0.385247	7.22191	5.13e-13	7.15e-11
62	VIT_211s0037g00510	34099.2	2.72003	0.236567	11.4979	1.35e-30	1.55e-27
63	VIT_200s0743g00030	46.4711	2.71796	0.603919	4.50053	6.78e-06	0.000229681
64	VIT_209s0002g00690	983.163	2.68634	0.230457	11.6566	2.12e-31	3.04e-28
65	VIT_211s0016g04080	3134.04	2.6598	0.246645	10.784	4.1e-27	3.7e-24
66	VIT_216s0022g00510	13297.3	2.61903	0.340328	7.69559	1.41e-14	2.42e-12
67	VIT_200s0260g00070	140.767	2.61255	0.530911	4.92088	8.62e-07	3.71e-05
68	VIT_204s0008g04480	4906.65	2.54797	0.132791	19.1877	4.69e-82	8.04e-78
69	VIT_204s0008g01590	3416.48	2.53089	0.516356	4.90143	9.51e-07	4.06e-05
70	VIT_213s0019g03090	3886.15	2.51062	0.60054	4.18061	2.91e-05	0.000807179
71	VIT_200s0347g00060	19.1731	2.49429	0.828535	3.01049	0.00260829	0.0313836
72	VIT_201s0011g04990	180.989	2.47337	0.59035	4.18967	2.79e-05	0.000785774
73	VIT_209s0002g00670	15.047	2.45849	0.754137	3.26001	0.00111409	0.0163746
74	VIT_200s2851g00010	2068.17	2.44163	0.837502	2.91537	0.00355271	0.0397635
75	VIT_200s0203g00120	10.5482	2.41651	0.77638	3.11254	0.00185484	0.0243633
76	VIT_209s0002g00640	5487.81	2.40973	0.276822	8.70496	3.18e-18	9.4e-16
77	VIT_213s0019g02840	4135.81	2.39937	0.425027	5.64523	1.65e-08	1e-06
78	VIT_213s0019g02820	5297.84	2.39563	0.545277	4.39342	1.12e-05	0.000355201
79	VIT_206s0004g08080	16.6547	2.3914	0.751191	3.18347	0.00145519	0.0199267
80	VIT_200s0591g00020	58.0394	2.38059	0.538942	4.41715	1e-05	0.000324389
81	VIT_210s0003g00260	10625.6	2.34202	0.24083	9.7248	2.36e-22	1.16e-19
82	VIT_206s0004g04470	82503.4	2.33615	0.219685	10.6341	2.07e-26	1.69e-23
83	VIT_205s0102g00600	70.9197	2.32341	0.482986	4.8105	1.51e-06	6.08e-05
84	VIT_218s0041g01230	7181.56	2.2921	0.241468	9.49237	2.26e-21	1.02e-18
85	VIT_214s0128g00700	13.4094	2.23144	0.768566	2.90338	0.00369154	0.0408906
86	VIT_211s0016g01020	57.8348	2.19556	0.681035	3.22385	0.00126478	0.0179052
87	VIT_202s0154g00480	7352.31	2.18324	0.27666	7.89141	2.99e-15	5.83e-13
88	VIT_202s0025g04060	1812.92	2.17204	0.291033	7.46319	8.45e-14	1.29e-11
89	VIT_206s0004g05770	137.845	2.12119	0.552994	3.83583	0.00012514	0.00281041
90	VIT_204s0044g00120	21.4717	2.09472	0.57743	3.62767	0.000285993	0.00559988
91	VIT_208s0007g05360	38.6537	2.0914	0.655242	3.19179	0.00141394	0.0194862
92	VIT_214s0006g01090	25.0267	2.08176	0.735912	2.82881	0.00467211	0.0485843
93	VIT_202s0025g01360	45.7878	2.07328	0.549239	3.77482	0.000160123	0.00350432
94	VIT_200s0225g00010	1817.61	2.07007	0.162733	12.7207	4.54e-37	7.79e-34
95	VIT_206s0004g05170	48.5721	2.05263	0.665864	3.08265	0.00205164	0.026153
96	VIT_212s0028g01720	266.658	2.05198	0.514601	3.9875	6.68e-05	0.00163201
97	VIT_200s2300g00010	1415.99	2.0392	0.225991	9.02338	1.82e-19	6.52e-17
98	VIT_202s0025g00620	21.1666	2.02925	0.601876	3.37154	0.000747505	0.0119591
99	VIT_207s0005g00010	2283.53	2.02186	0.206226	9.80409	1.08e-22	5.62e-20
100	VIT_210s0597g00040	27.2574	2.01272	0.620894	3.24165	0.00118839	0.0170917
101	VIT_205s0020g03480	46.3229	2.00821	0.441586	4.54772	5.42e-06	0.000189124
102	VIT_200s0187g00260	46.6655	2.00621	0.440643	4.55293	5.29e-06	0.000185253
103	VIT_207s0005g05780	79.0129	1.98784	0.621365	3.19915	0.00137834	0.0191339
104	VIT_219s0014g04670	103.055	1.98608	0.359605	5.52294	3.33e-08	1.93e-06
105	VIT_201s0127g00410	405.461	1.97905	0.217369	9.10454	8.66e-20	3.16e-17
106	VIT_218s0122g01340	673.081	1.96429	0.212924	9.22534	2.83e-20	1.15e-17
107	VIT_205s0051g00340	2253.84	1.9522	0.190849	10.2291	1.47e-24	1.01e-21
108	VIT_201s0026g02540	1570.83	1.9383	0.270615	7.16259	7.92e-13	1.08e-10
109	VIT_206s0004g00820	20.9275	1.92866	0.644905	2.99062	0.00278415	0.033082
110	VIT_209s0002g06790	118.617	1.92298	0.586177	3.28054	0.00103607	0.0154926
111	VIT_202s0025g02200	48.9561	1.92064	0.477122	4.02548	5.69e-05	0.00141851
112	VIT_208s0007g03900	881.287	1.906	0.344165	5.53804	3.06e-08	1.77e-06
113	VIT_215s0048g02780	85.0503	1.89241	0.393044	4.81476	1.47e-06	5.98e-05
114	VIT_208s0007g06710	4364.53	1.89141	0.181775	10.4052	2.35e-25	1.75e-22
115	VIT_213s0139g00360	3846.62	1.85156	0.120894	15.3156	6.02e-53	2.58e-49
116	VIT_213s0019g03170	2980.47	1.85066	0.221082	8.37096	5.72e-17	1.4e-14
117	VIT_209s0002g02240	78.3638	1.82275	0.529169	3.44455	0.000572016	0.00979506
118	VIT_212s0057g00670	2476.04	1.82053	0.136039	13.3824	7.66e-41	1.88e-37
119	VIT_206s0004g06130	742.387	1.77973	0.265061	6.71444	1.89e-11	1.94e-09
120	VIT_210s0116g00530	961.998	1.77824	0.245615	7.23993	4.49e-13	6.37e-11
121	VIT_204s0044g00300	37.9706	1.77421	0.608352	2.91643	0.00354066	0.0397025
122	VIT_212s0059g01670	241.125	1.76205	0.272481	6.46668	1e-10	9.6e-09
123	VIT_202s0033g00320	40.3092	1.7549	0.465754	3.76788	0.000164642	0.00358493
124	VIT_212s0059g02670	314.157	1.75227	0.283376	6.18356	6.27e-10	5.12e-08
125	VIT_208s0007g04000	98.3674	1.73695	0.595907	2.9148	0.00355911	0.0397857
126	VIT_219s0090g01770	91.4142	1.73496	0.318889	5.44064	5.31e-08	2.91e-06
127	VIT_210s0003g00160	54.6616	1.72807	0.577502	2.99232	0.00276868	0.0329421
128	VIT_208s0007g08380	210.854	1.72753	0.276104	6.25683	3.93e-10	3.4e-08
129	VIT_216s0098g00950	991.343	1.72601	0.212443	8.12461	4.49e-16	9.75e-14
130	VIT_210s0116g00170	48.4906	1.72287	0.580861	2.96607	0.00301634	0.0350164
131	VIT_209s0054g01030	62.0792	1.71033	0.496131	3.44733	0.000566152	0.00974326
132	VIT_214s0081g00500	1501.44	1.70494	0.191617	8.89765	5.7e-19	1.88e-16
133	VIT_200s0769g00010	14000.5	1.69812	0.174517	9.73041	2.24e-22	1.13e-19
134	VIT_204s0008g05050	48.7721	1.69626	0.389346	4.35669	1.32e-05	0.000410429
135	VIT_217s0000g09790	115.52	1.69434	0.395886	4.27988	1.87e-05	0.000552234
136	VIT_212s0057g00900	59.6985	1.685	0.348702	4.83221	1.35e-06	5.54e-05
137	VIT_215s0024g01440	135.645	1.68455	0.287809	5.853	4.83e-09	3.27e-07
138	VIT_210s0003g02150	91.2486	1.6836	0.356822	4.7183	2.38e-06	9.09e-05
139	VIT_200s0662g00030	494.499	1.68345	0.227228	7.40864	1.28e-13	1.9e-11
140	VIT_201s0127g00300	223.931	1.6769	0.271395	6.1788	6.46e-10	5.19e-08
141	VIT_208s0007g00130	63777.9	1.67575	0.183767	9.11886	7.59e-20	2.83e-17
142	VIT_201s0011g00350	430.942	1.67568	0.293133	5.71643	1.09e-08	6.71e-07
143	VIT_204s0008g05870	960.65	1.67252	0.236678	7.06662	1.59e-12	2.02e-10
144	VIT_208s0007g04600	256.627	1.6654	0.492826	3.3793	0.000726715	0.0117632
145	VIT_214s0081g00700	66.8759	1.65981	0.401406	4.13499	3.55e-05	0.000962159
146	VIT_217s0000g08080	3288.54	1.65324	0.26502	6.23817	4.43e-10	3.76e-08
147	VIT_205s0051g00050	74.2882	1.64819	0.417724	3.94565	7.96e-05	0.00189412
148	VIT_209s0018g01680	217.094	1.64683	0.266455	6.1805	6.39e-10	5.19e-08
149	VIT_213s0019g00860	467.028	1.64364	0.516089	3.18481	0.00144851	0.019851
150	VIT_207s0005g00030	5853.06	1.63674	0.189662	8.62979	6.15e-18	1.76e-15
151	VIT_206s0004g03650	3388.94	1.62257	0.112799	14.3846	6.47e-47	1.85e-43
152	VIT_204s0008g02950	270.201	1.61423	0.254043	6.35416	2.1e-10	1.86e-08
153	VIT_217s0000g02030	81.7885	1.60186	0.41038	3.90336	9.49e-05	0.00221757
154	VIT_214s0030g00420	65.4765	1.60149	0.401735	3.98643	6.71e-05	0.00163707
155	VIT_208s0007g00930	1868.38	1.57445	0.164368	9.57883	9.82e-22	4.55e-19
156	VIT_200s1682g00020	129.526	1.55663	0.419551	3.71024	0.000207066	0.00437004
157	VIT_205s0049g02090	98.8658	1.5521	0.409663	3.78872	0.000151424	0.00332667
158	VIT_207s0031g00610	151.234	1.54713	0.283781	5.45184	4.99e-08	2.76e-06
159	VIT_200s0194g00030	40925.9	1.5264	0.180556	8.45389	2.82e-17	7.44e-15
160	VIT_206s0004g00810	111.719	1.51342	0.404092	3.74522	0.000180233	0.00388224
161	VIT_200s0865g00030	137.968	1.50497	0.385943	3.89945	9.64e-05	0.00225063
1	VIT_211s0016g00710	10880.5	-1.50161	0.214891	-6.98778	2.79e-12	3.4e-10
2	VIT_200s0194g00120	501.16	-1.50457	0.468232	-3.21331	0.00131215	0.0184389
3	VIT_211s0016g00960	80.8566	-1.50643	0.492216	-3.06049	0.00220972	0.0279398
4	VIT_214s0068g01490	4087.37	-1.51983	0.28123	-5.40422	6.51e-08	3.47e-06
5	VIT_203s0063g00880	800.279	-1.52829	0.442359	-3.45487	0.000550559	0.00952692
6	VIT_204s0044g00730	698.276	-1.52943	0.279904	-5.46411	4.65e-08	2.59e-06
7	VIT_200s0487g00050	7661.81	-1.53468	0.182641	-8.40273	4.36e-17	1.1e-14
8	VIT_211s0016g05330	267.542	-1.5419	0.417625	-3.69206	0.000222441	0.00462583
9	VIT_201s0011g04650	160.622	-1.55205	0.401355	-3.86704	0.000110166	0.00252367
10	VIT_215s0046g02110	1426.53	-1.56488	0.32732	-4.7809	1.75e-06	6.95e-05
11	VIT_211s0037g00950	640.95	-1.56803	0.191073	-8.20643	2.28e-16	5.14e-14
12	VIT_216s0013g00990	287.384	-1.57037	0.530301	-2.96129	0.00306354	0.0354684
13	VIT_214s0066g02610	1112.97	-1.57282	0.288347	-5.45461	4.91e-08	2.73e-06
14	VIT_204s0023g02380	1169.25	-1.57538	0.230353	-6.83897	7.98e-12	8.89e-10
15	VIT_207s0005g04080	56.2458	-1.57729	0.555592	-2.83894	0.00452636	0.0473268
16	VIT_219s0140g00120	2032.38	-1.57778	0.480211	-3.28559	0.00101769	0.0153172
17	VIT_203s0132g00350	144.446	-1.58157	0.352534	-4.4863	7.25e-06	0.000243812
18	VIT_210s0003g01580	261.579	-1.58589	0.335878	-4.72163	2.34e-06	8.98e-05
19	VIT_202s0025g01240	1784.36	-1.60084	0.200767	-7.97365	1.54e-15	3.11e-13
20	VIT_202s0025g00360	2259.76	-1.60119	0.224536	-7.13112	9.96e-13	1.31e-10
21	VIT_213s0067g03050	42.3668	-1.60333	0.403705	-3.97154	7.14e-05	0.00172573
22	VIT_214s0108g01350	578.743	-1.61526	0.278272	-5.80461	6.45e-09	4.27e-07
23	VIT_207s0031g01710	2545.13	-1.61951	0.213018	-7.60266	2.9e-14	4.61e-12
24	VIT_200s0179g00320	291.914	-1.6213	0.260195	-6.2311	4.63e-10	3.9e-08
25	VIT_214s0083g01220	627.188	-1.63006	0.295451	-5.51719	3.44e-08	1.98e-06
26	VIT_211s0065g00350	139.354	-1.63062	0.50858	-3.20623	0.00134486	0.0187909
27	VIT_218s0001g03620	662.406	-1.63176	0.313341	-5.20761	1.91e-07	9.43e-06
28	VIT_213s0156g00150	408.334	-1.63727	0.250171	-6.54462	5.96e-11	5.82e-09
29	VIT_219s0014g04650	1432.14	-1.63921	0.265322	-6.17817	6.48e-10	5.19e-08
30	VIT_213s0158g00090	77.9213	-1.63965	0.496229	-3.30422	0.000952417	0.0146299
31	VIT_202s0025g04420	4054.93	-1.6422	0.5038	-3.25962	0.00111563	0.0163746
32	VIT_203s0063g00530	85.7822	-1.65594	0.531663	-3.11465	0.00184163	0.0242322
33	VIT_207s0005g04070	184.711	-1.6572	0.408325	-4.05853	4.94e-05	0.00125958
34	VIT_202s0234g00130	9442.3	-1.66055	0.238777	-6.95439	3.54e-12	4.19e-10
35	VIT_204s0023g01150	84.7044	-1.66348	0.552981	-3.00821	0.00262794	0.0315316
36	VIT_201s0011g00960	928.538	-1.66405	0.216441	-7.68824	1.49e-14	2.53e-12
37	VIT_212s0059g01580	153.432	-1.66613	0.341546	-4.8782	1.07e-06	4.52e-05
38	VIT_212s0034g02530	387.205	-1.67039	0.276969	-6.03097	1.63e-09	1.18e-07
39	VIT_206s0080g00090	2157.29	-1.67194	0.585098	-2.85753	0.00426948	0.0453877
40	VIT_212s0028g03550	785.871	-1.6777	0.452808	-3.70511	0.000211302	0.00443759
41	VIT_210s0116g01200	17278.1	-1.68214	0.216147	-7.78237	7.12e-15	1.3e-12
42	VIT_201s0011g06140	6237.63	-1.6883	0.243093	-6.9451	3.78e-12	4.41e-10
43	VIT_205s0020g03690	1468.73	-1.69059	0.304594	-5.55032	2.85e-08	1.66e-06
44	VIT_213s0067g03140	621.321	-1.69647	0.233512	-7.26502	3.73e-13	5.42e-11
45	VIT_206s0004g02830	766.082	-1.6988	0.313723	-5.41497	6.13e-08	3.3e-06
46	VIT_213s0067g01070	32932.9	-1.70853	0.22104	-7.72952	1.08e-14	1.87e-12
47	VIT_218s0001g11680	1221.39	-1.71645	0.325601	-5.27165	1.35e-07	6.78e-06
48	VIT_213s0074g00190	34.8883	-1.71864	0.509086	-3.37594	0.000735639	0.0118629
49	VIT_203s0091g00480	379.798	-1.73306	0.220887	-7.84589	4.3e-15	8.2e-13
50	VIT_213s0067g00140	29.4861	-1.74477	0.57031	-3.05933	0.00221829	0.0279863
51	VIT_214s0030g01230	68.1564	-1.74683	0.575061	-3.03765	0.00238429	0.0293892
52	VIT_204s0008g01070	8880.18	-1.75189	0.195947	-8.94067	3.87e-19	1.33e-16
53	VIT_203s0132g00340	2408.98	-1.75254	0.176682	-9.91916	3.44e-23	1.97e-20
54	VIT_216s0013g01000	3282.97	-1.75943	0.476811	-3.68999	0.000224264	0.00464165
55	VIT_216s0013g01110	648.958	-1.75992	0.330163	-5.33046	9.8e-08	5.05e-06
56	VIT_218s0001g11830	685.219	-1.77385	0.263138	-6.74113	1.57e-11	1.65e-09
57	VIT_218s0001g09230	6741.94	-1.77442	0.207458	-8.55315	1.2e-17	3.26e-15
58	VIT_205s0020g04390	892.451	-1.77874	0.341324	-5.21129	1.88e-07	9.3e-06
59	VIT_203s0038g03570	181.332	-1.78254	0.426367	-4.18075	2.91e-05	0.000807179
60	VIT_208s0007g04790	1439.38	-1.79091	0.449569	-3.98362	6.79e-05	0.0016542
61	VIT_202s0025g04460	1579.67	-1.79335	0.339999	-5.27459	1.33e-07	6.69e-06
62	VIT_212s0028g01640	228.047	-1.79436	0.383742	-4.67594	2.93e-06	0.000109381
63	VIT_214s0066g01810	1708.24	-1.79621	0.255195	-7.03856	1.94e-12	2.44e-10
64	VIT_216s0013g01050	992.645	-1.80073	0.433553	-4.15343	3.28e-05	0.000899171
65	VIT_210s0003g00390	806.847	-1.80192	0.294513	-6.1183	9.46e-10	7.15e-08
66	VIT_218s0166g00190	1094.36	-1.81065	0.254319	-7.11959	1.08e-12	1.42e-10
67	VIT_216s0013g00950	2072.36	-1.82085	0.439395	-4.14401	3.41e-05	0.000930969
68	VIT_200s0487g00010	2314.82	-1.84578	0.263982	-6.99209	2.71e-12	3.32e-10
69	VIT_204s0008g06150	267.778	-1.86555	0.433306	-4.30538	1.67e-05	0.000500921
70	VIT_218s0041g01290	5935.4	-1.87576	0.241387	-7.77075	7.8e-15	1.39e-12
71	VIT_205s0051g00780	81.7011	-1.88217	0.479854	-3.92239	8.77e-05	0.00207498
72	VIT_216s0013g01120	2169.99	-1.88732	0.237192	-7.95692	1.76e-15	3.52e-13
73	VIT_201s0150g00440	195.699	-1.88876	0.465724	-4.05554	5e-05	0.00127143
74	VIT_206s0004g04560	28.1106	-1.89814	0.62479	-3.03804	0.00238124	0.0293726
75	VIT_216s0013g01064	1188.67	-1.89876	0.43826	-4.33249	1.47e-05	0.000451713
76	VIT_208s0032g01220	2547.99	-1.89899	0.427406	-4.44306	8.87e-06	0.000292073
77	VIT_202s0025g04250	91.7685	-1.91468	0.568941	-3.36533	0.000764514	0.0121597
78	VIT_216s0013g00900	304.778	-1.91614	0.621197	-3.0846	0.00203827	0.0260601
79	VIT_207s0197g00240	4563.18	-1.9219	0.217228	-8.84742	8.96e-19	2.79e-16
80	VIT_211s0016g01810	27449.6	-1.92762	0.251902	-7.65223	1.98e-14	3.26e-12
81	VIT_210s0003g00140	611.221	-1.9279	0.228606	-8.43328	3.36e-17	8.74e-15
82	VIT_207s0197g00130	2068.14	-1.93168	0.218495	-8.84084	9.5e-19	2.91e-16
83	VIT_216s0013g00970	131.465	-1.941	0.448471	-4.32805	1.5e-05	0.000459291
84	VIT_218s0001g06030	669.666	-1.94576	0.43598	-4.46295	8.08e-06	0.000269331
85	VIT_212s0059g01720	76.9328	-1.94811	0.591765	-3.29204	0.000994651	0.0151029
86	VIT_202s0025g04270	998.425	-1.95462	0.628774	-3.10863	0.00187958	0.0244874
87	VIT_212s0059g01340	1052.64	-1.95586	0.254753	-7.67749	1.62e-14	2.73e-12
88	VIT_201s0011g03070	4604.62	-1.96514	0.253808	-7.74264	9.74e-15	1.7e-12
89	VIT_217s0000g03390	1685.1	-1.96625	0.379577	-5.1801	2.22e-07	1.07e-05
90	VIT_217s0000g02050	2057.42	-1.96874	0.234124	-8.40895	4.14e-17	1.06e-14
91	VIT_201s0011g00950	228.236	-1.9723	0.245158	-8.04501	8.62e-16	1.8e-13
92	VIT_203s0132g00380	47.3797	-1.97798	0.582753	-3.39419	0.000688308	0.0112798
93	VIT_202s0154g00070	25.7755	-1.98775	0.546317	-3.63845	0.00027428	0.00541554
94	VIT_206s0009g01110	23.7594	-1.98905	0.667722	-2.97887	0.00289318	0.0340708
95	VIT_218s0001g00990	29.1844	-1.98924	0.695532	-2.86002	0.00423617	0.0452017
96	VIT_205s0062g01160	1069.56	-1.99014	0.411881	-4.83184	1.35e-06	5.54e-05
97	VIT_208s0007g01090	1638.29	-1.99159	0.223733	-8.90163	5.5e-19	1.85e-16
98	VIT_205s0077g01470	3771.41	-1.99907	0.232427	-8.60087	7.91e-18	2.23e-15
99	VIT_205s0020g04000	543.88	-2.00668	0.259089	-7.74512	9.55e-15	1.69e-12
100	VIT_216s0039g02750	47.5171	-2.0179	0.435315	-4.6355	3.56e-06	0.000129988
101	VIT_216s0013g01090	551.604	-2.01803	0.373577	-5.40192	6.59e-08	3.49e-06
102	VIT_207s0031g01130	897.493	-2.01939	0.327999	-6.1567	7.43e-10	5.71e-08
103	VIT_202s0025g02510	34.67	-2.02229	0.486056	-4.16061	3.17e-05	0.000874138
104	VIT_215s0045g00640	54.531	-2.0255	0.557421	-3.6337	0.000279388	0.0054911
105	VIT_209s0002g04560	334.512	-2.02594	0.361696	-5.60121	2.13e-08	1.27e-06
106	VIT_208s0007g06560	319.038	-2.0462	0.324436	-6.30692	2.85e-10	2.49e-08
107	VIT_214s0068g01500	471.624	-2.05148	0.384455	-5.33607	9.5e-08	4.92e-06
108	VIT_203s0132g00050	2918.07	-2.052	0.289359	-7.09153	1.33e-12	1.71e-10
109	VIT_213s0084g00670	720.508	-2.0574	0.333947	-6.16087	7.23e-10	5.62e-08
110	VIT_202s0236g00100	697.166	-2.07136	0.359175	-5.76699	8.07e-09	5.19e-07
111	VIT_205s0020g04420	74.1572	-2.08121	0.726161	-2.86604	0.00415637	0.0447959
112	VIT_214s0108g01000	1109.39	-2.08561	0.390371	-5.34265	9.16e-08	4.76e-06
113	VIT_218s0001g01310	1186.76	-2.1109	0.296004	-7.13132	9.94e-13	1.31e-10
114	VIT_202s0025g05080	18.7113	-2.11171	0.651827	-3.23969	0.00119661	0.0171667
115	VIT_216s0050g01390	1012.41	-2.11288	0.2716	-7.77938	7.29e-15	1.32e-12
116	VIT_211s0016g01660	17.4095	-2.12444	0.724384	-2.93275	0.00335971	0.0382774
117	VIT_216s0013g01060	42.0444	-2.13899	0.610415	-3.50416	0.000458052	0.00823822
118	VIT_218s0001g01300	281.55	-2.15585	0.425144	-5.07087	3.96e-07	1.8e-05
119	VIT_210s0003g00130	81.3968	-2.16244	0.44525	-4.85669	1.19e-06	4.96e-05
120	VIT_204s0008g05510	3582.93	-2.19576	0.244099	-8.99539	2.35e-19	8.24e-17
121	VIT_216s0098g00190	346.331	-2.20424	0.32499	-6.78248	1.18e-11	1.27e-09
122	VIT_216s0050g02510	788.618	-2.2056	0.327236	-6.74009	1.58e-11	1.66e-09
123	VIT_209s0002g00220	1570.83	-2.21162	0.316174	-6.99496	2.65e-12	3.28e-10
124	VIT_215s0046g01140	4393.29	-2.22581	0.22639	-9.83175	8.22e-23	4.55e-20
125	VIT_202s0012g00170	2456.75	-2.23256	0.232609	-9.59792	8.16e-22	3.89e-19
126	VIT_201s0137g00360	57.4359	-2.25014	0.551401	-4.08077	4.49e-05	0.00117519
127	VIT_202s0025g04130	5288.85	-2.25472	0.24278	-9.28709	1.59e-20	6.64e-18
128	VIT_201s0011g04660	29.561	-2.2633	0.715664	-3.16251	0.00156414	0.0211864
129	VIT_208s0007g01070	757.206	-2.26569	0.305765	-7.40988	1.26e-13	1.9e-11
130	VIT_217s0000g03370	637.918	-2.26773	0.438741	-5.16873	2.36e-07	1.12e-05
131	VIT_211s0016g05550	79.5446	-2.27807	0.634624	-3.58964	0.000331138	0.00631999
132	VIT_216s0050g00410	267.304	-2.28327	0.503184	-4.53763	5.69e-06	0.000197592
133	VIT_209s0002g00320	22.5955	-2.3355	0.793485	-2.94334	0.00324693	0.0372648
134	VIT_214s0081g00190	31.7325	-2.33555	0.764948	-3.05321	0.00226405	0.0283759
135	VIT_201s0011g00990	508.445	-2.33661	0.363986	-6.41951	1.37e-10	1.25e-08
136	VIT_206s0004g05670	15.9332	-2.33857	0.770219	-3.03624	0.00239545	0.0294632
137	VIT_211s0052g01190	552.102	-2.35534	0.474148	-4.96751	6.78e-07	2.94e-05
138	VIT_206s0080g00780	1504.29	-2.36966	0.291275	-8.13548	4.1e-16	9.03e-14
139	VIT_205s0020g04780	3761.09	-2.40023	0.684296	-3.50758	0.000452199	0.00815004
140	VIT_213s0067g03130	48.2546	-2.49279	0.727628	-3.4259	0.000612755	0.0103176
141	VIT_202s0025g01280	3534.72	-2.51358	0.252643	-9.94915	2.54e-23	1.5e-20
142	VIT_206s0009g03540	260.748	-2.51486	0.413328	-6.08441	1.17e-09	8.68e-08
143	VIT_208s0007g00890	15.688	-2.51864	0.871364	-2.89045	0.0038469	0.0422298
144	VIT_218s0001g06150	2656.45	-2.52401	0.37672	-6.69997	2.08e-11	2.12e-09
145	VIT_216s0100g01010	183.951	-2.52493	0.855447	-2.95159	0.00316146	0.0364545
146	VIT_202s0025g04260	76.8314	-2.53468	0.881335	-2.87596	0.00402805	0.0437426
147	VIT_205s0020g03710	731.482	-2.53786	0.581041	-4.36778	1.26e-05	0.000393718
148	VIT_205s0020g03910	65.6806	-2.54408	0.494085	-5.14907	2.62e-07	1.23e-05
149	VIT_218s0001g06170	1557.41	-2.54971	0.421574	-6.04806	1.47e-09	1.07e-07
150	VIT_205s0049g01020	321.731	-2.57613	0.562741	-4.57783	4.7e-06	0.000166211
151	VIT_204s0069g00970	68.0185	-2.63157	0.804661	-3.27041	0.00107391	0.0159396
152	VIT_218s0001g15420	38.288	-2.67267	0.639504	-4.17928	2.92e-05	0.000810578
153	VIT_201s0010g02940	88.7825	-2.68053	0.673012	-3.98289	6.81e-05	0.00165695
154	VIT_213s0156g00630	14.739	-2.68228	0.787871	-3.40446	0.000662948	0.0109902
155	VIT_206s0061g00440	1136.92	-2.71491	0.32074	-8.46452	2.57e-17	6.9e-15
156	VIT_208s0058g00690	3650.63	-2.78429	0.262711	-10.5983	3.03e-26	2.37e-23
157	VIT_216s0100g00810	376.832	-2.81593	0.804521	-3.50013	0.000465028	0.00832875
158	VIT_201s0010g02930	70.8196	-2.82605	0.682807	-4.13887	3.49e-05	0.00094756
159	VIT_216s0100g00930	371.92	-2.84472	0.777424	-3.65916	0.000253041	0.0050639
160	VIT_208s0007g07190	200.168	-2.87997	0.496382	-5.80192	6.56e-09	4.33e-07
161	VIT_203s0038g03430	770.962	-2.91575	0.476289	-6.1218	9.25e-10	7.02e-08
162	VIT_200s1365g00010	11.378	-2.9684	1.04927	-2.82901	0.00466921	0.0485836
163	VIT_207s0005g01760	282.614	-2.99176	0.953319	-3.13826	0.00169956	0.0226405
164	VIT_216s0100g00860	618.374	-2.99582	0.757364	-3.95559	7.63e-05	0.00183209
165	VIT_218s0001g06140	18.2247	-3.0454	0.977156	-3.11659	0.00182953	0.0241284
166	VIT_216s0100g00380	2305.56	-3.06164	0.480399	-6.37312	1.85e-10	1.66e-08
167	VIT_214s0083g00440	8.5733	-3.13016	1.11097	-2.81749	0.00483999	0.0499667
168	VIT_200s0253g00040	17.8478	-3.1461	1.04827	-3.00123	0.00268895	0.0321961
169	VIT_206s0004g06850	25.2403	-3.16859	0.790564	-4.00801	6.12e-05	0.00150951
170	VIT_208s0007g08520	22.7379	-3.20217	0.873146	-3.66739	0.000245034	0.0049814
171	VIT_216s0100g00400	1171.89	-3.21793	0.617013	-5.21534	1.83e-07	9.12e-06
172	VIT_205s0020g01395	75.4307	-3.21987	0.645027	-4.99183	5.98e-07	2.62e-05
173	VIT_216s0013g00980	14.4555	-3.22592	1.12565	-2.86583	0.00415916	0.0447978
174	VIT_200s0583g00030	20.6724	-3.37641	1.06845	-3.16011	0.0015771	0.0213406
175	VIT_209s0054g00214	28.0178	-3.42078	1.18983	-2.87503	0.00403991	0.0438159
176	VIT_211s0118g00815	190.014	-3.52194	0.817436	-4.30852	1.64e-05	0.000494714
177	VIT_218s0041g00700	243.362	-3.58363	0.62503	-5.73353	9.84e-09	6.16e-07
178	VIT_205s0020g04220	50.6066	-3.6705	0.967896	-3.79224	0.000149292	0.00328826
179	VIT_210s0003g04210	178.655	-3.68367	0.512342	-7.18987	6.49e-13	8.9e-11
180	VIT_211s0149g00210	45.8143	-3.75967	1.33051	-2.82574	0.00471716	0.0489934
181	VIT_205s0020g04300	564.834	-3.89497	0.709016	-5.49349	3.94e-08	2.25e-06
182	VIT_211s0052g01260	160.034	-3.96904	0.908415	-4.36919	1.25e-05	0.000391901
183	VIT_207s0031g02055	11.3695	-4.00637	1.40598	-2.84953	0.00437845	0.0461742
184	VIT_205s0020g02650	19.2671	-4.01796	1.40807	-2.85352	0.00432379	0.0458514
185	VIT_213s0074g00340	24.7256	-4.10867	1.09849	-3.7403	0.000183801	0.00393714
186	VIT_211s0052g01180	61.7052	-4.15546	1.39151	-2.9863	0.00282374	0.0334598
187	VIT_211s0052g01280	63.7629	-4.15717	1.33686	-3.10966	0.00187306	0.0244209
188	VIT_218s0001g06020	208.129	-4.16282	0.581252	-7.16181	7.96e-13	1.08e-10
189	VIT_214s0108g00560	16.8347	-4.18107	1.38564	-3.01743	0.00254928	0.0308684
190	VIT_210s0003g03810	256.462	-4.19606	1.26903	-3.30652	0.000944634	0.0145363
191	VIT_205s0165g00230	7.51691	-4.21139	1.44484	-2.91479	0.00355933	0.0397857
192	VIT_209s0096g00490	372.486	-4.23345	0.690864	-6.12777	8.91e-10	6.8e-08
193	VIT_201s0010g03590	16.3075	-4.26141	1.40338	-3.03654	0.00239312	0.0294557
194	VIT_208s0007g05610	8.99051	-4.31797	1.41828	-3.04452	0.00233054	0.0289554
195	VIT_207s0031g03220	8.62344	-4.32896	1.23788	-3.49707	0.000470404	0.00839032
196	VIT_202s0025g00120	7.26063	-4.3425	1.49725	-2.90031	0.00372797	0.0411675
197	VIT_204s0079g00810	15.9064	-4.42739	1.2865	-3.44143	0.000578638	0.00986715
198	VIT_212s0055g01030	86.3196	-4.43566	1.3382	-3.31463	0.00091763	0.0141935
199	VIT_215s0024g01670	62.4287	-4.4499	1.39867	-3.18151	0.00146508	0.0200302
200	VIT_210s0003g01220	9.20408	-4.48659	1.53696	-2.91913	0.00351004	0.0394145
201	VIT_209s0002g00760	12.2864	-4.49344	1.51632	-2.96339	0.00304267	0.0352744
202	VIT_215s0048g02070	1398.75	-4.54433	0.444546	-10.2224	1.57e-24	1.04e-21
203	VIT_218s0001g11170	22.3492	-4.58255	1.43964	-3.18312	0.00145696	0.019935
204	VIT_200s0304g00060	19.4446	-4.58643	1.34274	-3.41571	0.00063615	0.0106281
205	VIT_210s0003g04230	133.348	-4.61405	0.591914	-7.79513	6.43e-15	1.19e-12
206	VIT_216s0100g00940	320.536	-4.61823	1.39353	-3.31404	0.00091957	0.0142016
207	VIT_201s0026g01870	63.275	-4.63083	1.07754	-4.29761	1.73e-05	0.000515197
208	VIT_216s0039g02690	11.9805	-4.75842	1.39783	-3.40414	0.000663719	0.0109924
209	VIT_218s0001g02490	8.44781	-4.84319	1.51318	-3.20066	0.00137112	0.0190646
210	VIT_207s0031g00710	306.628	-4.848	1.32036	-3.67174	0.000240903	0.00490903
211	VIT_200s0288g00070	15.7005	-4.86701	1.55386	-3.1322	0.00173503	0.0230407
212	VIT_210s0003g03030	30.8017	-4.90332	1.37052	-3.57772	0.000346605	0.00657133
213	VIT_208s0058g01160	91.0957	-5.03313	1.30299	-3.86277	0.000112108	0.00255452
214	VIT_219s0014g02350	8.40972	-5.041	1.45818	-3.45706	0.000546107	0.00948391
215	VIT_203s0038g01460	33.4101	-5.04253	1.40527	-3.5883	0.000332839	0.00633133
216	VIT_201s0011g02360	110.306	-5.10721	1.30431	-3.91565	9.02e-05	0.00213086
217	VIT_204s0008g06140	7.10795	-5.1291	1.61603	-3.1739	0.00150406	0.0204977
218	VIT_216s0022g00700	14.3228	-5.16588	1.45583	-3.54842	0.000387553	0.00720437
219	VIT_211s0052g01200	96.0123	-5.24506	1.30891	-4.00718	6.14e-05	0.00151265
220	VIT_208s0040g01040	39.2701	-5.30811	1.67839	-3.16263	0.00156353	0.0211864
221	VIT_211s0052g01330	82.3957	-5.34995	1.33229	-4.0156	5.93e-05	0.00147017
222	VIT_211s0052g01300	71.131	-5.37638	1.32019	-4.07243	4.65e-05	0.00120769
223	VIT_216s0050g02060	14.3664	-5.38467	1.66592	-3.23225	0.0012282	0.0175029
224	VIT_211s0078g00290	10.9365	-5.46302	1.68713	-3.23806	0.00120347	0.017222
225	VIT_210s0042g00930	138.031	-5.61139	1.57716	-3.55791	0.000373811	0.00701734
226	VIT_207s0005g05680	15.9201	-5.7019	1.51919	-3.75325	0.000174553	0.00377202
227	VIT_201s0010g02950	29.5127	-5.99675	1.3453	-4.45757	8.29e-06	0.000275635
228	VIT_216s0098g00220	404.45	-6.16265	1.05958	-5.81611	6.02e-09	4.02e-07
229	VIT_200s0642g00010	59.5965	-22.6218	5.8898	-3.84085	0.000122609	0.00277171

## Sheet: R5-R4
	GENE ID	base Mean	log2FoldChange	lfcSE	Stat	P value	P adj
1	VIT_200s0642g00010	59.5965	21.1928	5.88979	3.59823	0.00032039	0.00105503
2	VIT_216s0050g02400	441.664	13.3035	1.3621	9.76689	1.56e-22	2.2e-21
3	VIT_217s0000g01490	316.429	13.2108	2.61255	5.05668	4.27e-07	2.11e-06
4	VIT_213s0019g03050	872.363	12.3847	1.05349	11.7558	6.59e-32	1.29e-30
5	VIT_204s0008g01520	3000.34	12.2414	0.877198	13.9552	2.93e-44	8.72e-43
6	VIT_200s0271g00060	4230.52	12.2378	0.764519	16.0072	1.14e-57	5.14e-56
7	VIT_201s0011g03090	1067.54	12.0873	1.00054	12.0808	1.33e-33	2.77e-32
8	VIT_203s0091g00310	523.527	11.7691	1.10371	10.6632	1.51e-26	2.47e-25
9	VIT_218s0001g14420	157.7	11.6161	1.22089	9.51444	1.83e-21	2.46e-20
10	VIT_210s0003g03790	413.764	11.5472	1.14284	10.1039	5.31e-24	7.86e-23
11	VIT_207s0031g00710	306.628	11.3483	1.28323	8.84349	9.28e-19	1.1e-17
12	VIT_200s0271g00030	615.442	11.3201	1.10417	10.2521	1.16e-24	1.76e-23
13	VIT_212s0057g00510	101.581	11.0554	1.21932	9.0668	1.23e-19	1.53e-18
14	VIT_208s0007g06080	52.487	10.8667	1.96413	5.53259	3.16e-08	1.76e-07
15	VIT_204s0008g01530	3074.28	10.7276	0.485221	22.1087	2.61e-108	4.01e-106
16	VIT_202s0033g01030	2630.28	10.7034	0.654227	16.3604	3.67e-60	1.78e-58
17	VIT_210s0003g03800	62.2455	10.5271	1.28892	8.16734	3.15e-16	3.25e-15
18	VIT_212s0055g01030	86.3196	10.5248	1.28963	8.16111	3.32e-16	3.41e-15
19	VIT_219s0014g05420	65.8042	10.5127	1.24225	8.46266	2.61e-17	2.86e-16
20	VIT_201s0011g02360	110.306	10.5006	1.27377	8.24376	1.67e-16	1.75e-15
21	VIT_209s0002g00550	56.2116	10.4457	1.3442	7.77094	7.79e-15	7.37e-14
22	VIT_202s0025g04420	4054.93	10.415	0.488657	21.3134	8.52e-101	1.08e-98
23	VIT_201s0010g03670	73.1967	10.3596	1.2748	8.12645	4.42e-16	4.5e-15
24	VIT_218s0089g01270	673.88	10.2836	0.8487	12.1169	8.59e-34	1.8e-32
25	VIT_200s0404g00100	80.9372	10.1886	1.25435	8.12261	4.56e-16	4.64e-15
26	VIT_204s0008g01510	2783.11	10.0146	0.727911	13.758	4.56e-43	1.3e-41
27	VIT_219s0015g00530	201.423	9.94509	0.779892	12.7519	3.04e-37	7.17e-36
28	VIT_211s0149g00210	45.8143	9.85851	1.25161	7.87668	3.36e-15	3.24e-14
29	VIT_218s0001g06120	88.1289	9.71835	2.53701	3.83063	0.000127815	0.00045137
30	VIT_219s0090g00820	1827	9.69786	0.60581	16.0081	1.12e-57	5.07e-56
31	VIT_205s0020g04780	3761.09	9.68696	0.677295	14.3024	2.11e-46	6.75e-45
32	VIT_208s0007g00750	22.7916	9.57914	1.45978	6.56206	5.31e-11	3.79e-10
33	VIT_219s0015g00510	20.1335	9.54557	3.97018	2.40432	0.0162027	0.0366481
34	VIT_214s0006g02950	325.02	9.53568	0.955592	9.97882	1.89e-23	2.74e-22
35	VIT_215s0024g01670	62.4287	9.4914	1.35416	7.00905	2.4e-12	1.91e-11
36	VIT_207s0151g00640	37.258	9.44406	1.27382	7.41397	1.23e-13	1.07e-12
37	VIT_204s0008g01570	5971.28	9.33032	0.902109	10.3428	4.51e-25	6.99e-24
38	VIT_216s0100g00400	1171.89	9.31015	0.604533	15.4006	1.62e-53	6.49e-52
39	VIT_207s0129g00550	21.5124	9.30193	1.38193	6.73112	1.68e-11	1.26e-10
40	VIT_208s0007g08040	26.8171	9.21341	1.38745	6.64053	3.13e-11	2.29e-10
41	VIT_201s0010g03040	44.6992	9.19525	1.34901	6.81629	9.34e-12	7.11e-11
42	VIT_210s0042g00930	138.031	9.1392	1.5617	5.8521	4.85e-09	2.95e-08
43	VIT_205s0020g03190	3172.43	9.1313	0.304728	29.9654	2.77e-197	3.24e-194
44	VIT_211s0016g05370	16.8757	9.1118	1.4612	6.23584	4.49e-10	3e-09
45	VIT_206s0061g01390	2090.69	9.09863	0.502329	18.1129	2.52e-73	1.71e-71
46	VIT_204s0008g01970	16.6439	9.0723	3.11091	2.91629	0.00354223	0.00942158
47	VIT_210s0003g03030	30.8017	9.05553	1.33924	6.7617	1.36e-11	1.03e-10
48	VIT_219s0015g02890	21.5212	9.04422	3.15026	2.87094	0.00409252	0.0107456
49	VIT_210s0003g03810	256.462	9.01956	1.23945	7.27706	3.41e-13	2.88e-12
50	VIT_216s0098g01060	1238.44	8.99923	0.723896	12.4317	1.76e-35	3.9e-34
51	VIT_218s0082g00270	146.833	8.96338	1.52508	5.87732	4.17e-09	2.56e-08
52	VIT_206s0080g00090	2157.29	8.94186	0.570268	15.6801	2.07e-55	8.78e-54
53	VIT_204s0008g01580	8322.66	8.93115	0.547866	16.3017	9.6e-60	4.59e-58
54	VIT_208s0058g01030	28.1922	8.91339	1.2715	7.01016	2.38e-12	1.89e-11
55	VIT_216s0100g00710	17.6891	8.91043	1.61603	5.51378	3.51e-08	1.95e-07
56	VIT_211s0052g01280	63.7629	8.86208	1.28052	6.92069	4.49e-12	3.5e-11
57	VIT_211s0052g01200	96.0123	8.83736	1.28463	6.87933	6.01e-12	4.65e-11
58	VIT_211s0052g01300	71.131	8.83329	1.29863	6.80199	1.03e-11	7.82e-11
59	VIT_214s0108g00560	16.8347	8.82691	1.33242	6.6247	3.48e-11	2.53e-10
60	VIT_201s0010g03020	118.157	8.81109	1.27275	6.92287	4.43e-12	3.45e-11
61	VIT_204s0008g02020	14.437	8.76836	1.71213	5.12132	3.03e-07	1.53e-06
62	VIT_206s0004g00250	146.823	8.76359	0.869358	10.0805	6.74e-24	9.93e-23
63	VIT_208s0058g01160	91.0957	8.68253	1.27448	6.81262	9.58e-12	7.28e-11
64	VIT_202s0154g00490	398.069	8.67476	0.609194	14.2397	5.19e-46	1.64e-44
65	VIT_209s0002g05400	4408.2	8.63066	0.605312	14.2582	3.99e-46	1.26e-44
66	VIT_208s0007g04200	62.8423	8.58705	1.12115	7.65914	1.87e-14	1.73e-13
67	VIT_214s0066g00430	41.7808	8.57181	1.37782	6.22129	4.93e-10	3.29e-09
68	VIT_204s0008g01500	2647.1	8.56456	0.55107	15.5417	1.81e-54	7.5e-53
69	VIT_213s0019g03090	3886.15	8.50833	0.55902	15.2201	2.6e-52	9.95e-51
70	VIT_213s0064g01250	19.8498	8.48509	1.33774	6.34284	2.26e-10	1.54e-09
71	VIT_207s0141g00360	1171.57	8.47286	0.369114	22.9546	1.33e-116	2.48e-114
72	VIT_209s0002g05490	1680.22	8.4706	0.455667	18.5894	3.91e-77	2.96e-75
73	VIT_218s0041g02060	8866.59	8.45844	0.360962	23.4331	1.97e-121	4.15e-119
74	VIT_205s0020g04300	564.834	8.45335	0.695231	12.1591	5.13e-34	1.08e-32
75	VIT_212s0035g01910	4721.88	8.43628	0.396902	21.2553	2.94e-100	3.7e-98
76	VIT_219s0015g02730	535.377	8.43185	0.81636	10.3286	5.23e-25	8.06e-24
77	VIT_213s0067g01880	14.7324	8.42938	1.41297	5.9657	2.44e-09	1.53e-08
78	VIT_213s0084g00315	44.6747	8.40256	1.25884	6.67483	2.48e-11	1.82e-10
79	VIT_206s0004g01565	10.9868	8.36864	1.61971	5.16674	2.38e-07	1.21e-06
80	VIT_219s0085g01050	2321.19	8.36755	0.444525	18.8236	4.84e-79	3.81e-77
81	VIT_212s0034g01980	87.5042	8.36189	0.891681	9.37767	6.74e-21	8.84e-20
82	VIT_206s0004g00020	1846.24	8.35272	0.552906	15.1069	1.46e-51	5.45e-50
83	VIT_212s0055g01020	38.4549	8.33523	1.35677	6.14344	8.08e-10	5.28e-09
84	VIT_218s0001g08460	18.4325	8.3174	1.50564	5.52415	3.31e-08	1.84e-07
85	VIT_204s0008g01550	5462.03	8.30641	0.384132	21.6239	1.07e-103	1.48e-101
86	VIT_213s0067g00780	11.5143	8.30266	1.49776	5.54337	2.97e-08	1.66e-07
87	VIT_203s0038g01960	57.0982	8.28253	1.10564	7.49113	6.83e-14	6.06e-13
88	VIT_210s0116g00710	78.0615	8.26732	1.49027	5.54755	2.9e-08	1.62e-07
89	VIT_200s0199g00080	43.7843	8.26236	1.24014	6.66243	2.69e-11	1.98e-10
90	VIT_205s0062g00310	4590.23	8.23347	0.263648	31.229	4.31e-214	6.57e-211
91	VIT_218s0072g00260	275.079	8.20198	1.32923	6.17047	6.81e-10	4.49e-09
92	VIT_201s0011g06650	15.0615	8.18099	1.45474	5.62368	1.87e-08	1.07e-07
93	VIT_208s0056g00720	18.4945	8.17164	1.29631	6.30376	2.91e-10	1.97e-09
94	VIT_217s0000g05270	25.6739	8.16812	1.32476	6.16575	7.02e-10	4.62e-09
95	VIT_211s0016g04100	15.9914	8.16687	1.60329	5.09383	3.51e-07	1.75e-06
96	VIT_205s0020g03710	731.482	8.16413	0.570557	14.3091	1.92e-46	6.16e-45
97	VIT_200s0317g00070	23.6771	8.15554	1.44252	5.65368	1.57e-08	9.02e-08
98	VIT_206s0080g01020	19.2601	8.15363	1.66514	4.89668	9.75e-07	4.63e-06
99	VIT_201s0146g00480	403.344	8.14055	0.650939	12.5059	6.93e-36	1.56e-34
100	VIT_205s0062g00270	10924.2	8.13771	0.253751	32.0697	1.17e-225	2.11e-222
101	VIT_208s0056g01130	11.1979	8.1312	1.42186	5.71872	1.07e-08	6.29e-08
102	VIT_207s0005g02310	10.7642	8.11218	1.51425	5.35721	8.45e-08	4.51e-07
103	VIT_212s0028g01460	9.94236	8.0923	1.77265	4.5651	4.99e-06	2.16e-05
104	VIT_218s0001g13590	14.768	8.09203	1.47739	5.47723	4.32e-08	2.37e-07
105	VIT_213s0019g03070	18.2759	8.04763	1.45954	5.5138	3.51e-08	1.95e-07
106	VIT_207s0005g04770	18.3666	7.98318	1.48338	5.38176	7.38e-08	3.96e-07
107	VIT_216s0098g00220	404.45	7.97538	1.0572	7.5439	4.56e-14	4.11e-13
108	VIT_208s0040g01040	39.2701	7.97069	1.66343	4.79171	1.65e-06	7.61e-06
109	VIT_206s0004g04400	8.9765	7.95114	1.80293	4.41012	1.03e-05	4.27e-05
110	VIT_217s0000g02870	11.4571	7.94827	1.50608	5.27746	1.31e-07	6.87e-07
111	VIT_210s0116g00620	37.0024	7.9374	1.27243	6.23797	4.43e-10	2.96e-09
112	VIT_205s0049g00920	7.54572	7.9248	2.9475	2.68865	0.00717415	0.0178388
113	VIT_210s0116g01710	12.2805	7.9229	1.38853	5.70594	1.16e-08	6.74e-08
114	VIT_218s0001g01960	664.188	7.89746	0.519029	15.2158	2.78e-52	1.06e-50
115	VIT_214s0108g00690	64.5589	7.88368	1.01808	7.74368	9.66e-15	9.08e-14
116	VIT_202s0025g03575	7.89433	7.88309	1.76056	4.4776	7.55e-06	3.18e-05
117	VIT_217s0000g08550	11.9767	7.87355	1.35958	5.79118	6.99e-09	4.17e-08
118	VIT_206s0004g04440	61.0566	7.86947	1.41256	5.57108	2.53e-08	1.43e-07
119	VIT_211s0052g01730	828.878	7.86758	0.670386	11.7359	8.34e-32	1.61e-30
120	VIT_201s0011g05240	12.1724	7.86548	1.44891	5.42856	5.68e-08	3.08e-07
121	VIT_218s0001g11630	5100.49	7.85651	0.36819	21.3382	5.02e-101	6.52e-99
122	VIT_210s0042g00920	152.573	7.84705	1.47874	5.30658	1.12e-07	5.89e-07
123	VIT_208s0058g00210	160.338	7.8335	0.985236	7.95089	1.85e-15	1.81e-14
124	VIT_218s0001g12890	156.913	7.82868	1.01796	7.69055	1.47e-14	1.36e-13
125	VIT_210s0042g01230	12.438	7.82795	1.5218	5.14386	2.69e-07	1.36e-06
126	VIT_201s0010g03590	16.3075	7.82374	1.35847	5.75923	8.45e-09	5e-08
127	VIT_200s0304g00060	19.4446	7.82091	1.30725	5.98272	2.19e-09	1.38e-08
128	VIT_211s0052g01320	32.2541	7.81833	1.32632	5.89475	3.75e-09	2.31e-08
129	VIT_218s0072g00490	16.2459	7.81309	1.40511	5.56049	2.69e-08	1.51e-07
130	VIT_200s0317g00080	15.5955	7.80737	1.418	5.50588	3.67e-08	2.03e-07
131	VIT_214s0068g01490	4087.37	7.79208	0.276129	28.219	3.42e-175	2.2e-172
132	VIT_208s0040g02730	2593.4	7.77313	0.495874	15.6756	2.22e-55	9.4e-54
133	VIT_211s0052g01330	82.3957	7.76851	1.31546	5.90556	3.51e-09	2.17e-08
134	VIT_202s0012g00320	19.5534	7.76001	1.35761	5.71592	1.09e-08	6.39e-08
135	VIT_208s0058g00660	15.2373	7.74983	1.48466	5.21993	1.79e-07	9.27e-07
136	VIT_218s0001g09705	5.87994	7.72833	1.8402	4.19973	2.67e-05	0.000104675
137	VIT_205s0049g00500	14.273	7.72601	1.47562	5.23577	1.64e-07	8.53e-07
138	VIT_208s0007g04790	1439.38	7.72478	0.437814	17.644	1.13e-69	7.13e-68
139	VIT_205s0062g00300	17371	7.72073	0.17719	43.5732	0	0
140	VIT_209s0018g01490	64.7609	7.7158	0.806439	9.56775	1.09e-21	1.48e-20
141	VIT_218s0072g00480	16.3315	7.71556	1.51225	5.10204	3.36e-07	1.68e-06
142	VIT_218s0082g00027	12.798	7.71155	1.43303	5.38128	7.4e-08	3.97e-07
143	VIT_219s0015g00540	34.4949	7.71042	1.02584	7.51622	5.64e-14	5.04e-13
144	VIT_207s0031g02610	23572.7	7.69113	0.233707	32.9092	1.62e-237	4.02e-234
145	VIT_218s0041g02020	24245.4	7.65723	0.279263	27.4195	1.61e-165	9.12e-163
146	VIT_209s0096g00490	372.486	7.65693	0.682771	11.2145	3.46e-29	6.21e-28
147	VIT_200s0533g00030	8.26351	7.64947	1.63417	4.68094	2.86e-06	1.27e-05
148	VIT_209s0070g00390	10.918	7.64926	2.42124	3.15924	0.00158183	0.00452963
149	VIT_201s0011g02240	8.50635	7.62102	1.74809	4.35963	1.3e-05	5.32e-05
150	VIT_204s0044g01230	61.9271	7.60613	1.31237	5.79572	6.8e-09	4.06e-08
151	VIT_200s0199g00100	7.04455	7.60554	1.83928	4.13507	3.55e-05	0.0001364
152	VIT_216s0022g00700	14.3228	7.59512	1.43825	5.2808	1.29e-07	6.75e-07
153	VIT_211s0052g00100	5222.86	7.59238	0.293809	25.8412	3.05e-147	1.17e-144
154	VIT_203s0038g01460	33.4101	7.58706	1.38456	5.47974	4.26e-08	2.34e-07
155	VIT_205s0124g00230	12.5093	7.57929	1.57468	4.81322	1.49e-06	6.88e-06
156	VIT_218s0001g06300	7.35394	7.5783	1.79401	4.22422	2.4e-05	9.46e-05
157	VIT_201s0010g02270	20.6363	7.5543	1.33716	5.64951	1.61e-08	9.24e-08
158	VIT_214s0068g01290	11.3465	7.55399	1.73561	4.35234	1.35e-05	5.49e-05
159	VIT_200s0125g00410	22.0222	7.54301	1.31898	5.71882	1.07e-08	6.29e-08
160	VIT_208s0007g00310	1647.96	7.5408	0.473951	15.9105	5.36e-57	2.38e-55
161	VIT_203s0038g01400	19.5179	7.53183	1.37753	5.46762	4.56e-08	2.5e-07
162	VIT_202s0025g00280	58441.1	7.53168	0.360666	20.8827	7.7e-97	9.37e-95
163	VIT_214s0083g00110	9850.66	7.52243	0.253297	29.6981	8.13e-194	8.07e-191
164	VIT_212s0057g00620	7.4207	7.51115	1.58604	4.73579	2.18e-06	9.86e-06
165	VIT_208s0040g03180	7.51473	7.49512	1.61714	4.63479	3.57e-06	1.58e-05
166	VIT_201s0026g01870	63.275	7.49031	1.06665	7.02229	2.18e-12	1.74e-11
167	VIT_215s0046g03080	7.67248	7.47876	1.66085	4.50298	6.7e-06	2.84e-05
168	VIT_205s0077g01950	13.4938	7.46868	1.66882	4.47543	7.63e-06	3.21e-05
169	VIT_210s0042g00890	49.4223	7.46851	1.29342	5.77422	7.73e-09	4.59e-08
170	VIT_218s0001g10110	13.2475	7.45973	1.44068	5.17794	2.24e-07	1.15e-06
171	VIT_203s0063g00040	319.107	7.45918	0.380009	19.6289	8.75e-86	8.56e-84
172	VIT_208s0040g01820	13.5391	7.45379	1.39317	5.35025	8.78e-08	4.68e-07
173	VIT_203s0063g00720	209.647	7.4491	1.01251	7.35704	1.88e-13	1.62e-12
174	VIT_218s0001g02690	105.596	7.44681	0.610694	12.194	3.35e-34	7.15e-33
175	VIT_208s0007g00760	7.40589	7.44333	1.72792	4.30769	1.65e-05	6.65e-05
176	VIT_207s0005g01380	4.77604	7.43098	2.29401	3.2393	0.00119823	0.0035138
177	VIT_215s0021g01630	28.9546	7.42085	1.40705	5.27407	1.33e-07	7e-07
178	VIT_211s0016g02800	21.7188	7.41281	1.34689	5.50365	3.72e-08	2.06e-07
179	VIT_206s0004g07490	60.7223	7.39039	1.00611	7.34554	2.05e-13	1.76e-12
180	VIT_216s0013g00190	7.08663	7.38908	1.56672	4.71626	2.4e-06	1.08e-05
181	VIT_203s0063g01990	20.3278	7.3853	1.31665	5.60916	2.03e-08	1.16e-07
182	VIT_208s0040g03050	117.219	7.38286	0.972084	7.59488	3.08e-14	2.8e-13
183	VIT_215s0021g01520	4.93821	7.35224	2.11676	3.47335	0.000514	0.00162389
184	VIT_213s0019g02760	3084.38	7.34166	0.545743	13.4526	2.97e-41	8.06e-40
185	VIT_217s0000g00310	5.07189	7.32171	2.17285	3.36963	0.000752683	0.00229752
186	VIT_213s0019g03160	767.474	7.29856	0.861978	8.46722	2.51e-17	2.75e-16
187	VIT_213s0019g02820	5297.84	7.2875	0.528134	13.7986	2.6e-43	7.52e-42
188	VIT_212s0057g00150	5.66715	7.28623	2.31147	3.15221	0.00162039	0.00463068
189	VIT_202s0025g03500	82.1181	7.28501	0.714917	10.19	2.2e-24	3.3e-23
190	VIT_207s0005g05680	15.9201	7.28347	1.51279	4.8146	1.47e-06	6.84e-06
191	VIT_209s0002g05370	451.824	7.27115	0.642087	11.3242	9.95e-30	1.82e-28
192	VIT_200s0346g00110	55.5069	7.26878	0.865885	8.39463	4.67e-17	5.04e-16
193	VIT_219s0015g02700	2258.07	7.26017	0.285481	25.4313	1.14e-142	4.1e-140
194	VIT_212s0057g00613	149.749	7.25889	0.837724	8.66502	4.51e-18	5.13e-17
195	VIT_201s0026g01200	8.04739	7.25152	1.53074	4.73728	2.17e-06	9.8e-06
196	VIT_218s0041g00740	88.8027	7.24484	0.758452	9.55214	1.27e-21	1.72e-20
197	VIT_206s0009g01650	19.5046	7.23975	1.58231	4.57544	4.75e-06	2.06e-05
198	VIT_206s0004g04450	4.44343	7.23022	2.16871	3.33388	0.000856432	0.00258597
199	VIT_210s0042g00840	50.5898	7.22564	1.30604	5.53247	3.16e-08	1.76e-07
200	VIT_211s0052g01260	160.034	7.22131	0.893693	8.08031	6.46e-16	6.52e-15
201	VIT_214s0171g00440	9.36122	7.21584	1.54916	4.6579	3.19e-06	1.42e-05
202	VIT_214s0036g00870	4.93663	7.21061	2.00155	3.60251	0.000315164	0.00103903
203	VIT_200s0194g00120	501.16	7.1836	0.431006	16.6671	2.28e-62	1.17e-60
204	VIT_217s0000g05060	355.267	7.17581	0.402682	17.8201	4.94e-71	3.2e-69
205	VIT_201s0011g06140	6237.63	7.16719	0.240055	29.8564	7.25e-196	8e-193
206	VIT_203s0038g03430	770.962	7.16184	0.462619	15.4811	4.66e-54	1.92e-52
207	VIT_219s0027g00900	4.45759	7.1555	2.2651	3.15902	0.00158302	0.00453238
208	VIT_201s0011g05800	5.15413	7.15421	1.9376	3.69231	0.000222226	0.000752762
209	VIT_217s0000g03005	5.07703	7.14546	1.92628	3.70947	0.000207698	0.000708628
210	VIT_214s0060g02320	686.457	7.13923	0.695437	10.2658	1e-24	1.53e-23
211	VIT_201s0010g03010	21.6301	7.13667	1.17488	6.07438	1.24e-09	8.01e-09
212	VIT_205s0062g00610	11.267	7.11377	1.55481	4.57532	4.75e-06	2.06e-05
213	VIT_201s0026g01670	5.14066	7.11287	1.54493	4.60401	4.14e-06	1.81e-05
214	VIT_214s0066g01880	1373.86	7.11094	0.307833	23.1	4.63e-118	9.09e-116
215	VIT_209s0002g00760	12.2864	7.11012	1.4875	4.7799	1.75e-06	8.03e-06
216	VIT_204s0043g00820	34.9155	7.10692	1.07661	6.60118	4.08e-11	2.94e-10
217	VIT_212s0028g01670	83.5399	7.09849	0.961326	7.38406	1.54e-13	1.33e-12
218	VIT_213s0047g00060	46.2166	7.08983	0.915866	7.74113	9.85e-15	9.26e-14
219	VIT_218s0001g11310	25.9081	7.08623	1.49954	4.7256	2.29e-06	1.03e-05
220	VIT_201s0011g06640	38.6292	7.08622	0.951119	7.4504	9.31e-14	8.2e-13
221	VIT_207s0104g01376	9.99447	7.08573	1.39254	5.08835	3.61e-07	1.8e-06
222	VIT_202s0025g03200	7.81107	7.08034	1.84071	3.84652	0.000119808	0.000425209
223	VIT_218s0001g06090	57.9633	7.07663	1.53036	4.62415	3.76e-06	1.65e-05
224	VIT_207s0104g01000	18.148	7.07595	1.2182	5.80852	6.3e-09	3.78e-08
225	VIT_206s0004g03960	8.19028	7.06227	1.56133	4.52325	6.09e-06	2.6e-05
226	VIT_202s0025g02960	189.718	7.03533	0.966797	7.27694	3.41e-13	2.88e-12
227	VIT_212s0034g02000	62.487	7.02784	1.25869	5.58344	2.36e-08	1.33e-07
228	VIT_201s0127g00700	8380.13	7.02185	0.219209	32.0327	3.83e-225	6.33e-222
229	VIT_214s0108g00630	196.871	7.02122	0.770131	9.11691	7.73e-20	9.74e-19
230	VIT_219s0015g02610	12.9831	7.00456	1.60372	4.36769	1.26e-05	5.14e-05
231	VIT_218s0001g04640	75.6609	6.99704	0.773777	9.04272	1.53e-19	1.9e-18
232	VIT_215s0046g01590	8.31014	6.99518	1.49296	4.68545	2.79e-06	1.25e-05
233	VIT_213s0158g00340	2388.61	6.99003	0.269429	25.9438	2.13e-148	8.31e-146
234	VIT_200s1380g00020	4.84655	6.98873	1.7309	4.03762	5.4e-05	0.000202082
235	VIT_213s0019g02740	4985.86	6.98625	0.42355	16.4945	4.02e-61	1.99e-59
236	VIT_211s0078g00290	10.9365	6.97114	1.68098	4.14707	3.37e-05	0.000130066
237	VIT_218s0001g12900	1046.9	6.96892	0.471125	14.7921	1.65e-49	5.8e-48
238	VIT_206s0080g00450	1586.17	6.95858	0.283992	24.5028	1.38e-132	3.65e-130
239	VIT_209s0002g02260	7.47603	6.95615	1.82794	3.80546	0.000141539	0.000496036
240	VIT_203s0017g01400	6.60721	6.95194	1.76348	3.94218	8.07e-05	0.000293927
241	VIT_210s0071g00300	1084.84	6.94945	0.412611	16.8426	1.19e-63	6.45e-62
242	VIT_218s0041g00700	243.362	6.94048	0.612657	11.3285	9.48e-30	1.73e-28
243	VIT_211s0118g00815	190.014	6.93893	0.800373	8.66962	4.34e-18	4.94e-17
244	VIT_201s0011g05020	28.0609	6.93576	1.17252	5.91525	3.31e-09	2.06e-08
245	VIT_215s0048g00330	13.6737	6.93542	1.49741	4.6316	3.63e-06	1.6e-05
246	VIT_216s0100g00420	3.73193	6.93339	2.25854	3.06986	0.00214157	0.00596802
247	VIT_216s0039g02690	11.9805	6.92881	1.37619	5.03477	4.78e-07	2.35e-06
248	VIT_208s0058g00295	4.4935	6.91867	2.06884	3.34423	0.000825122	0.0025008
249	VIT_203s0063g01560	107.736	6.91765	1.19775	5.77552	7.67e-09	4.56e-08
250	VIT_219s0015g02880	603.051	6.91736	0.862081	8.02403	1.02e-15	1.02e-14
251	VIT_200s2540g00005	4.94903	6.91424	2.18159	3.16935	0.00152778	0.00439004
252	VIT_200s0181g00045	6.88938	6.90863	1.66596	4.14694	3.37e-05	0.000130098
253	VIT_205s0020g03530	11.6118	6.90091	1.52184	4.53457	5.77e-06	2.47e-05
254	VIT_209s0002g02730	32.9816	6.88852	1.11995	6.15072	7.71e-10	5.06e-09
255	VIT_216s0100g01000	24.3809	6.88473	1.44243	4.77302	1.81e-06	8.3e-06
256	VIT_213s0156g00155	12.2772	6.86897	1.38405	4.96296	6.94e-07	3.35e-06
257	VIT_201s0146g00150	22203.4	6.86253	0.38274	17.93	6.88e-72	4.53e-70
258	VIT_216s0100g00940	320.536	6.85035	1.39114	4.92427	8.47e-07	4.05e-06
259	VIT_214s0066g01010	3.33157	6.84071	2.33501	2.92963	0.00339365	0.00905673
260	VIT_218s0001g11050	8.92047	6.82188	1.79192	3.80703	0.000140647	0.000493171
261	VIT_212s0059g02570	6.065	6.81922	1.75557	3.88434	0.000102609	0.000368183
262	VIT_211s0016g03810	9.20183	6.81426	1.54771	4.4028	1.07e-05	4.41e-05
263	VIT_205s0049g00490	4.79912	6.80824	1.75915	3.87019	0.00010875	0.000388115
264	VIT_202s0025g00240	5.85935	6.79988	1.86712	3.6419	0.000270632	0.000903016
265	VIT_208s0007g04680	8.42709	6.79852	1.51961	4.47387	7.68e-06	3.23e-05
266	VIT_210s0116g01390	6.95493	6.78003	1.72017	3.94149	8.1e-05	0.00029472
267	VIT_211s0052g01180	61.7052	6.7631	1.37123	4.93213	8.13e-07	3.9e-06
268	VIT_218s0076g00340	20.9191	6.76007	1.31194	5.15275	2.57e-07	1.3e-06
269	VIT_218s0089g01150	54.4496	6.75842	1.37901	4.90091	9.54e-07	4.53e-06
270	VIT_201s0026g00830	3.92183	6.75057	1.75166	3.85382	0.00011629	0.000413462
271	VIT_202s0025g04600	7.67902	6.74612	1.64042	4.11244	3.92e-05	0.000149478
272	VIT_204s0008g01590	3416.48	6.74234	0.496174	13.5887	4.68e-42	1.3e-40
273	VIT_206s0061g00960	7.73373	6.72508	1.5123	4.44693	8.71e-06	3.64e-05
274	VIT_208s0058g01100	583.571	6.71366	0.49531	13.5545	7.46e-42	2.05e-40
275	VIT_211s0052g01340	34.8391	6.70779	1.08914	6.15882	7.33e-10	4.82e-09
276	VIT_212s0035g00630	4.83356	6.69002	1.77963	3.75922	0.000170446	0.000589845
277	VIT_202s0087g00750	1430.73	6.67725	0.461571	14.4663	1.98e-47	6.63e-46
278	VIT_203s0038g00530	4.40284	6.67261	2.20427	3.02712	0.00246893	0.00679068
279	VIT_218s0122g00690	693.772	6.6703	0.380879	17.5129	1.14e-68	6.97e-67
280	VIT_207s0005g05040	5.93945	6.66012	1.71119	3.89211	9.94e-05	0.000357169
281	VIT_212s0028g03390	5.425	6.64963	1.60855	4.13392	3.57e-05	0.000137004
282	VIT_210s0116g00470	8.21051	6.64623	1.56919	4.23545	2.28e-05	9.04e-05
283	VIT_211s0016g01140	8.96234	6.64258	1.73527	3.82798	0.000129197	0.00045568
284	VIT_209s0002g01080	34721.7	6.63737	0.235211	28.2188	3.44e-175	2.2e-172
285	VIT_211s0149g00350	34.0979	6.63728	2.72047	2.43976	0.0146971	0.033587
286	VIT_208s0058g00150	2270.22	6.63087	0.277472	23.8974	3.26e-126	7.79e-124
287	VIT_213s0147g00130	4.81939	6.62455	1.80594	3.6682	0.000244268	0.000821363
288	VIT_200s0615g00010	77.5253	6.62375	0.825679	8.02218	1.04e-15	1.03e-14
289	VIT_214s0066g02190	5678.65	6.60772	0.194286	34.0103	1.57e-253	7.8e-250
290	VIT_204s0069g00210	13.5763	6.59756	1.36592	4.83011	1.36e-06	6.35e-06
291	VIT_211s0052g00090	1466.49	6.59321	0.289	22.8138	3.34e-115	6.09e-113
292	VIT_200s0437g00070	23.2149	6.58922	1.54442	4.26646	1.99e-05	7.93e-05
293	VIT_219s0014g01820	5.14609	6.58607	2.063	3.19247	0.00141062	0.00407877
294	VIT_208s0007g05580	1230.6	6.57847	0.482718	13.628	2.73e-42	7.62e-41
295	VIT_204s0008g07220	15.2396	6.5781	1.73297	3.79584	0.000147142	0.000514312
296	VIT_204s0023g02060	3.79166	6.57704	2.33601	2.8155	0.00487015	0.0125859
297	VIT_218s0001g09600	3.57855	6.57135	2.38403	2.75641	0.00584405	0.0148419
298	VIT_219s0090g01250	6.65393	6.565	1.93383	3.39481	0.00068676	0.00211647
299	VIT_201s0011g06600	216.576	6.562	0.651385	10.0739	7.21e-24	1.06e-22
300	VIT_217s0000g07190	47314	6.56109	0.342082	19.1799	5.45e-82	4.79e-80
301	VIT_212s0057g00060	12.9333	6.55892	1.50917	4.34604	1.39e-05	5.64e-05
302	VIT_204s0008g04980	3.30108	6.55522	1.94694	3.36693	0.000760087	0.00231834
303	VIT_218s0001g00160	3.33854	6.55026	2.07936	3.15013	0.00163195	0.00466104
304	VIT_203s0063g00260	5.04951	6.54796	1.87324	3.49553	0.000473121	0.00150432
305	VIT_202s0241g00100	819.78	6.54515	0.278463	23.5046	3.66e-122	8.08e-120
306	VIT_204s0044g01030	4.47567	6.53601	1.81127	3.60852	0.000307943	0.00101742
307	VIT_200s2071g00010	4.24017	6.53211	1.7398	3.75453	0.000173669	0.000600474
308	VIT_209s0002g04490	1423.47	6.53166	0.404862	16.1331	1.49e-58	6.87e-57
309	VIT_219s0093g00110	1011.86	6.53003	0.427688	15.2682	1.25e-52	4.85e-51
310	VIT_202s0012g01960	1722.11	6.52349	0.263385	24.7679	1.99e-135	5.72e-133
311	VIT_213s0074g00730	13.4832	6.51664	1.49071	4.37151	1.23e-05	5.05e-05
312	VIT_200s0199g00090	4.19434	6.50917	2.15644	3.01847	0.00254051	0.00696631
313	VIT_208s0007g03760	4.029	6.48718	1.96185	3.30667	0.00094412	0.00282411
314	VIT_218s0001g11170	22.3492	6.48602	1.41954	4.56911	4.9e-06	2.12e-05
315	VIT_209s0002g08580	3.53188	6.46607	2.18162	2.96388	0.00303789	0.00819655
316	VIT_208s0040g01070	20.803	6.46541	1.47472	4.38417	1.16e-05	4.78e-05
317	VIT_219s0177g00160	122.868	6.46516	0.843717	7.66271	1.82e-14	1.68e-13
318	VIT_200s0301g00070	5.93309	6.4381	1.88683	3.41213	0.000644562	0.00199697
319	VIT_211s0037g00620	13.2905	6.42876	1.44692	4.44306	8.87e-06	3.7e-05
320	VIT_201s0010g02950	29.5127	6.42864	1.35237	4.7536	2e-06	9.09e-06
321	VIT_207s0141g00690	81.9242	6.4171	0.661423	9.70195	2.96e-22	4.1e-21
322	VIT_208s0056g01680	3.82227	6.41166	2.04027	3.14255	0.00167483	0.00477321
323	VIT_216s0050g02060	14.3664	6.40296	1.66497	3.84568	0.000120216	0.000426277
324	VIT_215s0021g02120	3.05823	6.3973	2.47352	2.58631	0.00970083	0.0233013
325	VIT_218s0001g09240	5.6039	6.3924	1.77236	3.6067	0.00031011	0.00102407
326	VIT_207s0129g00660	102.502	6.38559	1.36082	4.69244	2.7e-06	1.21e-05
327	VIT_201s0011g00970	2.72683	6.37074	2.70965	2.35113	0.0187164	0.0416876
328	VIT_209s0002g03630	6.23927	6.36476	2.07231	3.07134	0.00213101	0.00593943
329	VIT_219s0140g00120	2032.38	6.36364	0.476002	13.3689	9.18e-41	2.41e-39
330	VIT_218s0122g00980	4.82224	6.36052	2.02234	3.14512	0.00166017	0.00473685
331	VIT_208s0007g06250	12.3445	6.35222	1.50803	4.21227	2.53e-05	9.94e-05
332	VIT_210s0042g00910	7.46051	6.34924	1.68546	3.76706	0.000165184	0.000572936
333	VIT_206s0080g00840	4.08172	6.33899	1.8097	3.50278	0.000460422	0.001467
334	VIT_213s0067g01020	255.654	6.3342	0.653503	9.69268	3.24e-22	4.48e-21
335	VIT_210s0116g01200	17278.1	6.32781	0.215496	29.3639	1.59e-189	1.37e-186
336	VIT_202s0234g00130	9442.3	6.32235	0.237607	26.6084	5.43e-156	2.45e-153
337	VIT_209s0018g02030	2.87813	6.31936	2.46349	2.56521	0.0103114	0.0245805
338	VIT_209s0002g00230	343.348	6.31487	0.340788	18.5302	1.18e-76	8.7e-75
339	VIT_218s0001g02590	60.844	6.31427	0.790285	7.98987	1.35e-15	1.33e-14
340	VIT_211s0016g00710	10880.5	6.30965	0.213626	29.536	9.93e-192	8.96e-189
341	VIT_219s0093g00310	3305.16	6.30727	0.255837	24.6534	3.38e-134	9.45e-132
342	VIT_203s0063g02130	3.19793	6.30524	2.37328	2.65676	0.00788947	0.0194276
343	VIT_212s0028g03046	3.14106	6.30251	2.5207	2.5003	0.0124088	0.0289306
344	VIT_207s0141g00330	3.76479	6.2969	2.07562	3.03374	0.00241546	0.00666299
345	VIT_219s0093g00150	577.076	6.28248	0.363544	17.2812	6.52e-67	3.86e-65
346	VIT_209s0002g00900	5.90732	6.27922	1.97935	3.17236	0.00151204	0.00434922
347	VIT_210s0116g00140	10.9865	6.27125	1.40923	4.45011	8.58e-06	3.59e-05
348	VIT_211s0016g01970	623.423	6.2711	0.388016	16.162	9.35e-59	4.34e-57
349	VIT_204s0023g01715	29.8306	6.25542	0.819283	7.63524	2.25e-14	2.07e-13
350	VIT_207s0005g00730	52.1455	6.25392	1.17211	5.33563	9.52e-08	5.05e-07
351	VIT_213s0067g02030	28.1153	6.25336	1.16645	5.36101	8.28e-08	4.42e-07
352	VIT_218s0122g00800	6.37298	6.25143	1.65603	3.77495	0.000160041	0.000556458
353	VIT_215s0024g01700	37.2082	6.24172	0.916386	6.81124	9.68e-12	7.35e-11
354	VIT_207s0005g01745	4.65322	6.239	1.70769	3.65348	0.000258712	0.000866593
355	VIT_219s0015g02690	3.76003	6.2382	2.09275	2.98086	0.00287443	0.0077958
356	VIT_202s0154g00480	7352.31	6.23068	0.267641	23.28	7.08e-120	1.46e-117
357	VIT_216s0050g01150	44631.2	6.2253	0.326227	19.0827	3.51e-81	2.99e-79
358	VIT_212s0142g00280	6.59785	6.2249	1.69874	3.66443	0.000247886	0.000832015
359	VIT_207s0191g00100	3.71735	6.22384	2.19868	2.83071	0.00464445	0.0120481
360	VIT_201s0011g04220	2.93462	6.21959	2.47828	2.50964	0.0120853	0.028276
361	VIT_202s0025g04700	10.465	6.21797	1.48129	4.19768	2.7e-05	0.000105497
362	VIT_208s0007g04800	27.1565	6.2099	1.03682	5.98935	2.11e-09	1.33e-08
363	VIT_200s0463g00025	16.3291	6.20572	1.32026	4.70039	2.6e-06	1.16e-05
364	VIT_201s0011g04080	5.6532	6.20465	1.8396	3.37283	0.000743993	0.00227578
365	VIT_202s0025g04690	14.6325	6.20289	1.49015	4.16259	3.15e-05	0.000122061
366	VIT_207s0031g01980	457.64	6.20099	0.759526	8.16429	3.23e-16	3.33e-15
367	VIT_216s0050g01620	3.11451	6.1883	2.33117	2.65459	0.00794053	0.0195306
368	VIT_209s0002g00220	1570.83	6.18554	0.313738	19.7156	1.58e-86	1.58e-84
369	VIT_214s0060g00790	140.292	6.18386	1.0915	5.66548	1.47e-08	8.45e-08
370	VIT_203s0063g00250	4.94746	6.1823	1.67235	3.69678	0.000218348	0.000741778
371	VIT_204s0008g07230	18.6936	6.17954	1.67994	3.67844	0.000234665	0.000791386
372	VIT_200s0878g00030	4.08894	6.17909	2.34647	2.63336	0.00845458	0.0206323
373	VIT_216s0100g00850	195.016	6.17395	1.28109	4.81931	1.44e-06	6.69e-06
374	VIT_201s0011g04820	1904.44	6.16905	0.460161	13.4063	5.56e-41	1.48e-39
375	VIT_218s0001g02060	6.31928	6.16734	1.57616	3.91288	9.12e-05	0.00032993
376	VIT_206s0004g06460	3.99878	6.16592	1.92772	3.19856	0.00138117	0.00400179
377	VIT_202s0154g00510	3.44125	6.15761	1.9879	3.09755	0.00195131	0.00548477
378	VIT_214s0108g00900	3.14489	6.14759	2.3725	2.59119	0.00956452	0.0230072
379	VIT_200s0264g00015	17.6563	6.1473	1.03998	5.91099	3.4e-09	2.11e-08
380	VIT_205s0020g04220	50.6066	6.14594	0.953969	6.4425	1.18e-10	8.2e-10
381	VIT_215s0048g01350	94.7263	6.14046	0.636664	9.64474	5.17e-22	7.08e-21
382	VIT_201s0010g02290	6246.83	6.12624	0.349065	17.5504	5.9e-69	3.66e-67
383	VIT_216s0013g00440	5.98839	6.10618	1.89818	3.21686	0.001296	0.00377375
384	VIT_203s0063g00050	2252.03	6.10336	0.188552	32.3696	7.36e-230	1.46e-226
385	VIT_211s0052g00175	3.56448	6.09494	2.41608	2.52266	0.011647	0.0273667
386	VIT_216s0039g00230	2.97048	6.09471	2.31355	2.63435	0.00842993	0.0205772
387	VIT_204s0008g01490	6681.66	6.09338	0.384918	15.8303	1.92e-56	8.4e-55
388	VIT_200s0371g00050	55.8492	6.09277	1.46062	4.17136	3.03e-05	0.000117667
389	VIT_205s0020g02380	3.98084	6.08658	1.93631	3.14339	0.00167	0.00476082
390	VIT_205s0062g00710	91.3359	6.08394	1.25498	4.84784	1.25e-06	5.84e-06
391	VIT_203s0063g00700	140.966	6.08301	0.730055	8.33227	7.93e-17	8.46e-16
392	VIT_218s0001g00930	4.45153	6.07986	2.048	2.96868	0.00299086	0.00808946
393	VIT_203s0038g04340	11.9681	6.07686	1.37627	4.41546	1.01e-05	4.18e-05
394	VIT_209s0002g04290	24.7228	6.06138	1.11174	5.45218	4.98e-08	2.72e-07
395	VIT_212s0055g01010	44.7837	6.06089	1.49546	4.05286	5.06e-05	0.000189998
396	VIT_215s0046g01800	2.97918	6.05869	2.16282	2.8013	0.00508979	0.0130973
397	VIT_205s0062g00480	8.07951	6.0516	1.64813	3.67179	0.000240855	0.000810884
398	VIT_201s0011g02630	7.69815	6.0497	1.80771	3.34661	0.000818075	0.00248224
399	VIT_213s0019g02770	896.545	6.0493	0.60689	9.96771	2.11e-23	3.06e-22
400	VIT_207s0031g00530	6873.39	6.04333	0.243049	24.8647	1.79e-136	5.39e-134
401	VIT_218s0001g07090	8595.67	6.03255	0.231437	26.0656	8.95e-150	3.62e-147
402	VIT_202s0012g02190	3590.19	6.02872	0.428667	14.0639	6.33e-45	1.95e-43
403	VIT_210s0003g05820	2.84484	6.02544	2.15133	2.8008	0.00509763	0.013114
404	VIT_200s0238g00070	3.38519	6.01924	2.40302	2.50486	0.01225	0.0286039
405	VIT_204s0008g02230	197.257	6.01914	0.580467	10.3695	3.41e-25	5.32e-24
406	VIT_216s0039g01280	2.97089	6.01523	2.60316	2.31075	0.0208469	0.0458873
407	VIT_213s0019g03000	2912.18	6.0147	0.277343	21.6869	2.73e-104	3.84e-102
408	VIT_215s0048g00700	2.93071	6.01322	2.62999	2.2864	0.0222306	0.0485081
409	VIT_207s0205g00190	3.27318	6.01272	2.07576	2.89664	0.00377181	0.00996887
410	VIT_214s0108g01270	15.6775	5.99862	1.3101	4.57874	4.68e-06	2.03e-05
411	VIT_204s0043g01022	8.99609	5.99116	1.45939	4.10525	4.04e-05	0.000153758
412	VIT_215s0046g03420	5.12183	5.98969	1.62887	3.67722	0.000235794	0.000794652
413	VIT_211s0052g01190	552.102	5.98395	0.457548	13.0783	4.38e-39	1.1e-37
414	VIT_202s0025g04790	10.9262	5.97472	1.27456	4.68766	2.76e-06	1.23e-05
415	VIT_217s0000g04750	29427.2	5.96753	0.176937	33.7269	2.33e-249	7.71e-246
416	VIT_206s0004g02110	3.15743	5.96523	2.56387	2.32665	0.0199837	0.0441833
417	VIT_206s0061g00570	4.33333	5.9601	1.96508	3.03301	0.00242131	0.00667543
418	VIT_219s0090g01360	10.0976	5.95782	1.79928	3.31123	0.000928877	0.00278229
419	VIT_219s0014g02180	2.27416	5.95511	2.38815	2.49361	0.0126453	0.0294162
420	VIT_209s0018g00240	4311.98	5.95298	0.264073	22.5429	1.57e-112	2.67e-110
421	VIT_204s0008g01380	3463.21	5.95168	0.305161	19.5034	1.03e-84	9.71e-83
422	VIT_216s0050g00410	267.304	5.94354	0.488322	12.1714	4.42e-34	9.4e-33
423	VIT_205s0020g04280	86.1611	5.9434	0.723003	8.22044	2.03e-16	2.11e-15
424	VIT_219s0014g04940	18269.5	5.93776	0.175712	33.7927	2.53e-250	1e-246
425	VIT_208s0032g01220	2547.99	5.93715	0.424144	13.998	1.6e-44	4.84e-43
426	VIT_211s0016g04400	3.69996	5.93562	2.18776	2.7131	0.00666561	0.0166914
427	VIT_200s0805g00010	6.04767	5.93508	1.73675	3.41734	0.000632355	0.00196282
428	VIT_212s0055g00950	3.8006	5.93231	2.16748	2.73696	0.0062009	0.015645
429	VIT_205s0077g02320	519.845	5.92932	0.358578	16.5357	2.03e-61	1.01e-59
430	VIT_213s0019g02840	4135.81	5.92906	0.414202	14.3144	1.78e-46	5.72e-45
431	VIT_208s0007g05610	8.99051	5.91614	1.40889	4.19915	2.68e-05	0.000104894
432	VIT_211s0016g04740	3.85947	5.90183	2.2397	2.6351	0.00841124	0.0205417
433	VIT_217s0000g01140	3.38356	5.89781	2.16647	2.72232	0.00648259	0.0162844
434	VIT_210s0071g00130	4.33479	5.8879	1.95851	3.00631	0.00264439	0.00722124
435	VIT_200s0922g00010	26.0874	5.88689	1.08022	5.44974	5.04e-08	2.75e-07
436	VIT_205s0049g01560	5.04319	5.88188	1.84485	3.18827	0.00143125	0.0041318
437	VIT_205s0020g03330	2397.02	5.87825	0.363568	16.1682	8.45e-59	3.95e-57
438	VIT_206s0004g00875	3.4375	5.87706	1.85592	3.16666	0.00154202	0.00442903
439	VIT_218s0001g11680	1221.39	5.87292	0.319568	18.3777	1.98e-75	1.41e-73
440	VIT_202s0025g04510	3.34786	5.85768	1.72335	3.39901	0.000676307	0.00208717
441	VIT_208s0105g00400	185.901	5.85253	0.496978	11.7762	5.18e-32	1.01e-30
442	VIT_200s0240g00050	25.6605	5.85214	0.926431	6.31687	2.67e-10	1.82e-09
443	VIT_210s0116g00940	2335.05	5.85051	0.269106	21.7405	8.5e-105	1.22e-102
444	VIT_208s0040g01130	347.035	5.84052	0.682264	8.56051	1.12e-17	1.25e-16
445	VIT_207s0005g04390	27.1594	5.8394	0.992586	5.88302	4.03e-09	2.47e-08
446	VIT_217s0000g07770	2.72163	5.83599	2.22781	2.61961	0.00880303	0.0213854
447	VIT_205s0077g00500	86.527	5.83596	0.688118	8.48105	2.23e-17	2.45e-16
448	VIT_204s0023g01980	5.22421	5.83186	1.56799	3.71933	0.000199751	0.000683441
449	VIT_212s0035g02100	5.4773	5.8301	1.81899	3.20514	0.00134999	0.00391888
450	VIT_213s0019g02930	8135.15	5.83008	0.279216	20.8802	8.11e-97	9.82e-95
451	VIT_209s0002g00890	3248.72	5.82626	0.226959	25.671	2.47e-145	9.24e-143
452	VIT_217s0119g00120	3.50653	5.82364	2.04952	2.84146	0.00449068	0.0116737
453	VIT_206s0004g01010	235.912	5.82275	0.410202	14.1948	9.86e-46	3.1e-44
454	VIT_212s0028g02740	5.22432	5.82021	2.03354	2.86211	0.00420834	0.0110133
455	VIT_215s0021g01660	40.3372	5.81307	0.718533	8.09019	5.96e-16	6.02e-15
456	VIT_218s0001g06030	669.666	5.8095	0.422983	13.7346	6.3e-43	1.79e-41
457	VIT_206s0004g05870	120.702	5.80018	0.504171	11.5044	1.25e-30	2.35e-29
458	VIT_218s0041g02070	17.5746	5.79169	1.46733	3.9471	7.91e-05	0.000288695
459	VIT_218s0001g05890	2.93579	5.78137	2.35391	2.45607	0.0140465	0.0322541
460	VIT_212s0028g01720	266.658	5.77508	0.377995	15.2782	1.07e-52	4.17e-51
461	VIT_201s0026g00970	4.8636	5.7741	1.84115	3.13613	0.00171193	0.00486846
462	VIT_211s0016g01230	4204	5.77237	0.186553	30.9422	3.24e-210	4.01e-207
463	VIT_213s0067g01960	848.15	5.77157	0.305646	18.8832	1.57e-79	1.27e-77
464	VIT_216s0050g01310	14.4017	5.76868	1.66709	3.46033	0.000539504	0.00169717
465	VIT_208s0007g03900	881.287	5.75731	0.294416	19.555	3.74e-85	3.58e-83
466	VIT_218s0041g02260	228.548	5.75607	1.04868	5.48887	4.05e-08	2.23e-07
467	VIT_218s0001g11280	3.062	5.75003	2.08896	2.75258	0.00591273	0.0149895
468	VIT_209s0054g00214	28.0178	5.74999	1.17111	4.90985	9.11e-07	4.34e-06
469	VIT_207s0031g00750	12.2675	5.74981	1.77242	3.24404	0.00117847	0.003462
470	VIT_200s0477g00010	487.801	5.74926	0.250132	22.9849	6.6e-117	1.27e-114
471	VIT_216s0098g01090	21.128	5.74443	1.20467	4.76847	1.86e-06	8.48e-06
472	VIT_201s0011g03800	7.19425	5.73349	1.77811	3.22448	0.00126202	0.00368454
473	VIT_200s0317g00060	1439.82	5.72064	0.225641	25.3529	8.35e-142	2.91e-139
474	VIT_201s0010g01840	1929.01	5.71989	0.197566	28.9518	2.66e-184	1.96e-181
475	VIT_205s0049g00740	2.389	5.70673	2.48648	2.29511	0.0217269	0.0475501
476	VIT_207s0141g00100	3.28997	5.70521	2.10393	2.7117	0.00669393	0.0167559
477	VIT_202s0154g00600	91.8052	5.70478	0.629008	9.06949	1.2e-19	1.5e-18
478	VIT_203s0017g01450	4.69568	5.68871	2.13397	2.66579	0.00768079	0.0189561
479	VIT_215s0046g03500	38.1928	5.68618	0.77952	7.29446	3e-13	2.54e-12
480	VIT_217s0000g07570	15.4542	5.68453	1.09041	5.2132	1.86e-07	9.6e-07
481	VIT_201s0011g05680	80.6443	5.67786	1.04785	5.41858	6.01e-08	3.25e-07
482	VIT_211s0016g01800	2.65619	5.66556	2.39254	2.36801	0.0178839	0.0399994
483	VIT_204s0008g03000	2.25161	5.66284	2.10154	2.69461	0.00704709	0.0175558
484	VIT_201s0011g04620	318.482	5.66277	0.555198	10.1996	1.99e-24	3e-23
485	VIT_213s0067g02630	419.959	5.65472	0.315989	17.8953	1.28e-71	8.4e-70
486	VIT_216s0100g00860	618.374	5.65038	0.754056	7.49332	6.72e-14	5.97e-13
487	VIT_213s0084g00240	10.3805	5.64804	1.56079	3.6187	0.000296083	0.000980686
488	VIT_219s0014g04620	2.97083	5.64355	2.10116	2.68592	0.0072331	0.0179719
489	VIT_207s0005g03340	697.578	5.62795	0.492756	11.4214	3.27e-30	6.05e-29
490	VIT_214s0066g02100	241.02	5.62735	0.339571	16.5719	1.11e-61	5.56e-60
491	VIT_214s0068g01350	7.30722	5.62102	1.71767	3.27247	0.00106611	0.00315668
492	VIT_200s0463g00030	1614.9	5.61888	0.325296	17.2732	7.49e-67	4.43e-65
493	VIT_205s0049g01140	7.62562	5.5966	1.76991	3.16208	0.00156647	0.00449146
494	VIT_207s0129g00800	304.713	5.59607	1.0169	5.50308	3.73e-08	2.06e-07
495	VIT_201s0011g04990	180.989	5.59491	0.434349	12.8811	5.75e-38	1.38e-36
496	VIT_207s0005g01640	3.64768	5.58795	2.19925	2.54084	0.0110586	0.0261264
497	VIT_211s0016g01290	2.43078	5.58179	2.29652	2.43055	0.0150761	0.034367
498	VIT_200s0181g00080	1047.64	5.58049	0.250869	22.2446	1.27e-109	2.05e-107
499	VIT_207s0005g03220	22.1086	5.57059	1.41815	3.92806	8.56e-05	0.000310869
500	VIT_218s0041g02210	12.3005	5.5642	1.52465	3.64948	0.000262769	0.000878997
501	VIT_202s0025g02590	1711.33	5.56209	0.302056	18.4141	1.01e-75	7.26e-74
502	VIT_213s0067g01120	1147.88	5.55472	0.399518	13.9036	6.03e-44	1.78e-42
503	VIT_210s0116g01870	16.6747	5.53479	1.15618	4.78715	1.69e-06	7.77e-06
504	VIT_219s0014g03290	1892.48	5.53084	0.430986	12.833	1.07e-37	2.55e-36
505	VIT_219s0014g05030	5.24478	5.53058	1.72946	3.19787	0.00138448	0.00401019
506	VIT_206s0004g01135	2.53018	5.52155	2.37205	2.32775	0.0199254	0.0440837
507	VIT_205s0049g02120	3.05017	5.51526	1.90403	2.89662	0.0037721	0.00996887
508	VIT_202s0012g01540	4.03997	5.5137	1.94638	2.8328	0.00461418	0.0119727
509	VIT_211s0037g00510	34099.2	5.51316	0.234638	23.4964	4.44e-122	9.47e-120
510	VIT_207s0129g00210	554.815	5.50751	0.313389	17.574	3.89e-69	2.43e-67
511	VIT_202s0033g01020	2118.48	5.50617	0.242148	22.7388	1.85e-114	3.25e-112
512	VIT_211s0016g01810	27449.6	5.5041	0.251657	21.8714	4.86e-106	7.25e-104
513	VIT_200s0199g00310	7112.77	5.50156	0.243503	22.5934	5.03e-113	8.61e-111
514	VIT_214s0066g02590	2.66269	5.49774	2.31962	2.3701	0.0177833	0.0398014
515	VIT_217s0000g01800	60.5816	5.49157	0.687259	7.99054	1.34e-15	1.33e-14
516	VIT_214s0036g00930	29139.7	5.48529	0.150562	36.4321	1.32e-290	8.74e-287
517	VIT_203s0063g00060	539.315	5.4821	0.278467	19.6868	2.8e-86	2.78e-84
518	VIT_204s0023g01890	8.04757	5.47804	1.9213	2.85122	0.00435522	0.0113602
519	VIT_209s0002g06790	118.617	5.46377	0.455637	11.9915	3.94e-33	8.05e-32
520	VIT_205s0020g04330	365.972	5.45996	0.596383	9.15512	5.43e-20	6.89e-19
521	VIT_206s0009g03420	187.981	5.43353	0.67366	8.06569	7.28e-16	7.33e-15
522	VIT_212s0028g01450	1.92772	5.4333	2.32983	2.33206	0.0196976	0.0436333
523	VIT_206s0004g00370	5.87689	5.43138	1.63801	3.31584	0.000913688	0.00274217
524	VIT_210s0116g01520	2.45508	5.4294	2.35005	2.31033	0.0208699	0.0459277
525	VIT_200s0572g00020	66.3633	5.42865	1.00967	5.37665	7.59e-08	4.07e-07
526	VIT_215s0046g02190	1011.67	5.4199	0.272112	19.9179	2.85e-88	2.91e-86
527	VIT_209s0002g07950	2.41047	5.41939	2.33271	2.32321	0.0201677	0.0445552
528	VIT_219s0014g02900	493.824	5.40138	0.334009	16.1713	8.03e-59	3.77e-57
529	VIT_202s0012g01640	703.741	5.39556	0.252072	21.4048	1.2e-101	1.59e-99
530	VIT_210s0071g00850	3.81099	5.3938	1.81163	2.97732	0.00290782	0.00787775
531	VIT_206s0004g00130	209.616	5.39052	0.358787	15.0243	5.09e-51	1.87e-49
532	VIT_212s0028g03550	785.871	5.3854	0.444727	12.1095	9.41e-34	1.97e-32
533	VIT_212s0059g01370	14.7686	5.38274	1.28274	4.19628	2.71e-05	0.000106064
534	VIT_200s0372g00070	28.1024	5.38232	0.791106	6.80354	1.02e-11	7.74e-11
535	VIT_214s0219g00090	16.4117	5.37864	1.22922	4.37565	1.21e-05	4.97e-05
536	VIT_204s0044g00220	14189.9	5.37454	0.197979	27.147	2.74e-162	1.43e-159
537	VIT_207s0104g00050	6.7201	5.37286	1.51693	3.54192	0.000397225	0.00128189
538	VIT_202s0012g00390	26.4435	5.37173	1.00499	5.34505	9.04e-08	4.81e-07
539	VIT_207s0031g00705	71.5771	5.3712	1.56137	3.44005	0.000581614	0.00181955
540	VIT_203s0038g00300	24.9179	5.36987	0.932658	5.75759	8.53e-09	5.04e-08
541	VIT_211s0052g01410	11.3319	5.36696	1.7164	3.12687	0.00176679	0.00501084
542	VIT_208s0040g00960	232.556	5.36502	0.438515	12.2345	2.03e-34	4.38e-33
543	VIT_201s0010g01650	3.59298	5.36259	1.95046	2.74939	0.00597062	0.0151266
544	VIT_204s0008g03640	8.19811	5.35792	1.39986	3.82745	0.000129476	0.000456582
545	VIT_205s0020g04420	74.1572	5.35502	0.699587	7.65455	1.94e-14	1.79e-13
546	VIT_203s0063g00460	5692.25	5.35272	0.282822	18.9261	6.95e-80	5.7e-78
547	VIT_211s0052g01270	23.5685	5.35247	1.15714	4.62561	3.73e-06	1.64e-05
548	VIT_204s0069g00520	2.35776	5.34479	2.28083	2.34335	0.0191115	0.0424582
549	VIT_204s0008g03770	1557.24	5.34446	0.259135	20.6242	1.66e-94	1.94e-92
550	VIT_200s0572g00010	355.068	5.34158	0.843043	6.33607	2.36e-10	1.61e-09
551	VIT_211s0052g01085	20.7836	5.34075	1.03586	5.15587	2.52e-07	1.28e-06
552	VIT_213s0019g02540	15.6893	5.33304	1.68084	3.17285	0.00150951	0.00434259
553	VIT_200s0385g00025	86.6808	5.33088	0.908677	5.86664	4.45e-09	2.72e-08
554	VIT_213s0067g00260	25396.1	5.32499	0.171324	31.0814	4.29e-212	6.08e-209
555	VIT_203s0038g00760	22281.7	5.32073	0.222381	23.9262	1.63e-126	4e-124
556	VIT_215s0046g02110	1426.53	5.31677	0.322	16.5117	3.02e-61	1.5e-59
557	VIT_217s0000g02150	4.44016	5.31559	2.08332	2.5515	0.010726	0.0254252
558	VIT_203s0038g02180	2.81819	5.31352	1.95406	2.71922	0.00654356	0.0164168
559	VIT_216s0022g02370	52.1319	5.31145	0.588668	9.02283	1.83e-19	2.27e-18
560	VIT_210s0003g01580	261.579	5.3079	0.326455	16.2592	1.92e-59	9.15e-58
561	VIT_216s0039g01120	191.374	5.30674	0.477747	11.1078	1.15e-28	2.02e-27
562	VIT_202s0025g04460	1579.67	5.30592	0.32821	16.1662	8.73e-59	4.07e-57
563	VIT_216s0050g02230	9.43212	5.29159	1.40643	3.76243	0.000168267	0.00058261
564	VIT_201s0011g03760	535.144	5.28984	0.286948	18.4348	6.9e-76	4.96e-74
565	VIT_206s0004g01320	4.38815	5.28597	2.17766	2.42737	0.0152089	0.0346411
566	VIT_201s0010g01430	5738.72	5.28479	0.196898	26.8402	1.1e-158	5.31e-156
567	VIT_216s0013g00890	3605.78	5.28427	0.238067	22.1966	3.7e-109	5.88e-107
568	VIT_204s0008g07010	3.56507	5.27973	2.15084	2.45473	0.0140991	0.0323506
569	VIT_200s0583g00030	20.6724	5.27569	1.05698	4.99129	6e-07	2.92e-06
570	VIT_200s0267g00030	13.2706	5.27332	1.49268	3.53278	0.000411218	0.00132382
571	VIT_216s0013g01500	6.19044	5.2601	1.80017	2.922	0.00347796	0.00926429
572	VIT_202s0033g01060	2767.51	5.25785	0.160271	32.806	4.83e-236	1.07e-232
573	VIT_206s0004g05120	8.40955	5.25735	1.52774	3.44125	0.000579026	0.00181202
574	VIT_216s0039g01420	388.382	5.25637	0.559916	9.38778	6.13e-21	8.06e-20
575	VIT_203s0038g02370	6.99306	5.25621	1.79132	2.93427	0.00334337	0.00894178
576	VIT_218s0122g00300	3203.39	5.2507	0.176889	29.6836	1.25e-193	1.18e-190
577	VIT_212s0057g00180	12.2197	5.24515	1.46188	3.58793	0.000333308	0.00109304
578	VIT_215s0048g01320	11.8078	5.23837	1.30646	4.0096	6.08e-05	0.000225874
579	VIT_215s0021g01150	29.6822	5.23223	0.681637	7.67597	1.64e-14	1.52e-13
580	VIT_201s0150g00440	195.699	5.22431	0.453263	11.526	9.75e-31	1.83e-29
581	VIT_209s0002g00640	5487.81	5.22075	0.268611	19.4361	3.82e-84	3.53e-82
582	VIT_216s0022g00510	13297.3	5.22004	0.337468	15.4682	5.69e-54	2.33e-52
583	VIT_217s0000g04330	17.0139	5.21872	1.34744	3.87307	0.000107472	0.000384244
584	VIT_203s0097g00710	2913.86	5.21735	0.188778	27.6375	3.94e-168	2.45e-165
585	VIT_207s0005g03230	100.824	5.21376	1.03205	5.05184	4.38e-07	2.16e-06
586	VIT_218s0041g01310	15.0184	5.21197	1.16738	4.46469	8.02e-06	3.37e-05
587	VIT_213s0064g00910	5.19794	5.20876	2.03783	2.55603	0.0105875	0.025139
588	VIT_215s0048g01365	211.511	5.20735	0.379454	13.7233	7.37e-43	2.09e-41
589	VIT_218s0001g10480	9.11138	5.20184	1.3682	3.80196	0.000143554	0.000502478
590	VIT_214s0128g00390	500.869	5.18808	0.300206	17.2818	6.46e-67	3.84e-65
591	VIT_217s0000g01630	121.391	5.18564	0.412677	12.5659	3.25e-36	7.45e-35
592	VIT_202s0025g04060	1812.92	5.18394	0.273977	18.9211	7.65e-80	6.25e-78
593	VIT_208s0007g07520	1283.33	5.18348	0.255653	20.2755	2.12e-91	2.27e-89
594	VIT_201s0011g02260	3.82844	5.18201	2.06255	2.51242	0.0119905	0.0280773
595	VIT_217s0000g09290	10.8722	5.18157	1.40559	3.6864	0.000227445	0.000768361
596	VIT_216s0039g01100	950.986	5.18139	0.495244	10.4623	1.29e-25	2.03e-24
597	VIT_205s0077g00510	3236.49	5.1779	0.173802	29.7919	4.97e-195	5.19e-192
598	VIT_205s0020g02650	19.2671	5.1754	1.40592	3.68116	0.000232175	0.000783388
599	VIT_206s0004g03680	11.1675	5.16506	1.37104	3.76726	0.000165046	0.000572555
600	VIT_203s0063g01790	507.919	5.16481	0.334072	15.4602	6.44e-54	2.62e-52
601	VIT_200s0189g00010	2.94837	5.16385	2.22795	2.31775	0.0204627	0.0451366
602	VIT_207s0005g01240	116.303	5.15853	0.52528	9.82053	9.19e-23	1.3e-21
603	VIT_217s0000g05030	11595.2	5.15221	0.188606	27.3173	2.64e-164	1.46e-161
604	VIT_201s0026g02080	4355.96	5.147	0.20548	25.0487	1.8e-138	5.59e-136
605	VIT_206s0004g05770	137.845	5.1455	0.420405	12.2394	1.91e-34	4.13e-33
606	VIT_200s0266g00035	48.5299	5.14288	1.09637	4.69084	2.72e-06	1.22e-05
607	VIT_214s0066g02050	4.35753	5.14121	1.9436	2.6452	0.0081642	0.0200123
608	VIT_210s0003g04540	3745.24	5.13006	0.380652	13.477	2.14e-41	5.81e-40
609	VIT_214s0066g01590	93.9535	5.12644	0.561116	9.13614	6.47e-20	8.18e-19
610	VIT_216s0039g01110	402.321	5.11997	0.554994	9.22527	2.83e-20	3.63e-19
611	VIT_211s0016g03190	141.298	5.11588	0.516296	9.90881	3.81e-23	5.49e-22
612	VIT_206s0009g03540	260.748	5.10761	0.403489	12.6586	1e-36	2.34e-35
613	VIT_216s0050g01240	967.015	5.09489	0.330049	15.4368	9.26e-54	3.74e-52
614	VIT_207s0005g01360	240.775	5.09259	0.50971	9.99116	1.67e-23	2.42e-22
615	VIT_217s0053g00610	4.77612	5.0914	1.93435	2.6321	0.00848601	0.0207014
616	VIT_214s0108g00030	2.92921	5.08899	2.07014	2.45828	0.0139603	0.0320842
617	VIT_205s0165g00230	7.51691	5.08785	1.44622	3.51804	0.000434754	0.00139281
618	VIT_216s0100g00930	371.92	5.08486	0.772783	6.57994	4.71e-11	3.38e-10
619	VIT_201s0011g06360	3.78352	5.08401	1.84865	2.75013	0.00595719	0.0150964
620	VIT_200s0229g00200	4.29363	5.08295	1.72197	2.95183	0.00315897	0.00848978
621	VIT_212s0134g00480	352.571	5.0819	0.41913	12.1249	7.8e-34	1.64e-32
622	VIT_202s0025g00420	113.223	5.0775	1.11341	4.56031	5.11e-06	2.2e-05
623	VIT_200s0407g00020	845.271	5.06854	0.265165	19.1147	1.91e-81	1.65e-79
624	VIT_218s0001g02300	11255.9	5.06459	0.173259	29.2314	7.75e-188	6.41e-185
625	VIT_201s0026g01690	4.00125	5.06257	2.03558	2.48704	0.0128809	0.0298978
626	VIT_207s0031g02055	11.3695	5.06075	1.40366	3.6054	0.000311669	0.00102819
627	VIT_216s0100g00810	376.832	5.05524	0.800762	6.31304	2.74e-10	1.86e-09
628	VIT_210s0003g01250	15.4736	5.04584	1.22238	4.12788	3.66e-05	0.000140301
629	VIT_207s0005g06420	6006.53	5.04499	0.216048	23.3512	1.34e-120	2.8e-118
630	VIT_212s0057g00140	25.6673	5.04221	1.43066	3.5244	0.00042444	0.00136285
631	VIT_206s0004g07190	2.99219	5.0359	1.99538	2.52378	0.01161	0.0272861
632	VIT_214s0219g00270	2.60252	5.03453	2.19747	2.29106	0.0219601	0.0480022
633	VIT_212s0028g02710	13.3715	5.03017	1.32059	3.80903	0.000139515	0.000489461
634	VIT_201s0026g00910	14.7752	5.02974	1.1745	4.28247	1.85e-05	7.4e-05
635	VIT_217s0000g03940	2915.27	5.02509	0.227608	22.0778	5.17e-108	7.89e-106
636	VIT_207s0141g00920	4562.43	5.02154	0.198958	25.2392	1.49e-140	4.93e-138
637	VIT_214s0060g02140	11474	5.01958	0.182274	27.5386	6.06e-167	3.65e-164
638	VIT_218s0041g02010	30.1421	5.01331	1.22625	4.08833	4.34e-05	0.000164814
639	VIT_204s0069g00670	3.55506	4.99572	1.79128	2.78891	0.0052885	0.0135524
640	VIT_204s0008g05890	19.5076	4.98916	1.00265	4.97598	6.49e-07	3.15e-06
641	VIT_206s0009g00370	51.9429	4.98711	0.792647	6.29172	3.14e-10	2.12e-09
642	VIT_218s0001g09340	121.908	4.98666	0.370723	13.4512	3.03e-41	8.2e-40
643	VIT_218s0166g00190	1094.36	4.98486	0.249801	19.9553	1.35e-88	1.39e-86
644	VIT_218s0001g02580	4.54703	4.98408	1.96753	2.53316	0.0113038	0.0266327
645	VIT_206s0004g04970	42.0647	4.97463	0.647638	7.68119	1.58e-14	1.46e-13
646	VIT_206s0004g06840	6901.05	4.97454	0.223991	22.2086	2.84e-109	4.54e-107
647	VIT_210s0003g05480	18.5682	4.952	1.17535	4.21322	2.52e-05	9.9e-05
648	VIT_216s0039g01170	262.796	4.94437	0.892886	5.53752	3.07e-08	1.72e-07
649	VIT_219s0093g00320	29.8274	4.94152	0.85635	5.77045	7.91e-09	4.69e-08
650	VIT_201s0011g05250	864.201	4.93584	0.252239	19.5681	2.89e-85	2.79e-83
651	VIT_208s0007g00740	5807.02	4.93552	0.227805	21.6655	4.34e-104	6.02e-102
652	VIT_204s0023g01060	46.3062	4.93479	0.554293	8.90286	5.44e-19	6.55e-18
653	VIT_207s0005g01760	282.614	4.92833	0.947547	5.20114	1.98e-07	1.02e-06
654	VIT_201s0026g00820	2010.13	4.9268	0.201933	24.3982	1.79e-131	4.67e-129
655	VIT_202s0012g00890	4.78433	4.9238	1.9682	2.50167	0.0123607	0.0288354
656	VIT_202s0025g03660	8511.86	4.92118	0.133195	36.9473	8.06e-299	8e-295
657	VIT_215s0046g02170	112.558	4.92111	0.533223	9.22899	2.73e-20	3.51e-19
658	VIT_207s0005g03430	46.7462	4.91778	0.584177	8.41832	3.82e-17	4.13e-16
659	VIT_202s0025g04130	5288.85	4.91307	0.241661	20.3304	6.92e-92	7.47e-90
660	VIT_213s0019g00860	467.028	4.9066	0.496276	9.88684	4.75e-23	6.79e-22
661	VIT_218s0001g06180	1516.4	4.8944	0.469477	10.4252	1.9e-25	2.98e-24
662	VIT_207s0005g01080	84.2779	4.89429	0.592416	8.26158	1.44e-16	1.51e-15
663	VIT_204s0044g01880	274.126	4.88361	0.432349	11.2955	1.38e-29	2.51e-28
664	VIT_207s0197g00090	4742.23	4.88341	0.212223	23.0108	3.64e-117	7.08e-115
665	VIT_217s0000g05840	104.852	4.88103	0.44813	10.892	1.26e-27	2.12e-26
666	VIT_214s0006g01925	9.07886	4.87981	1.5551	3.13793	0.00170145	0.00484211
667	VIT_209s0018g01290	11.1417	4.8785	1.26028	3.87096	0.000108409	0.000387034
668	VIT_205s0020g03640	4.99222	4.87375	1.93835	2.51438	0.011924	0.0279349
669	VIT_218s0001g06230	3.52204	4.87313	2.13611	2.28131	0.02253	0.0490751
670	VIT_212s0059g00880	1639.39	4.87296	0.379854	12.8285	1.13e-37	2.7e-36
671	VIT_219s0090g00800	3.30609	4.87121	2.00881	2.42492	0.0153119	0.0348556
672	VIT_218s0041g01230	7181.56	4.86732	0.237538	20.4907	2.6e-93	2.95e-91
673	VIT_213s0064g01370	3.06444	4.86656	2.08797	2.33077	0.0197657	0.0437645
674	VIT_215s0045g01010	4.5884	4.8662	1.87856	2.59039	0.00958675	0.0230532
675	VIT_216s0013g00080	3.06352	4.86614	1.87152	2.6001	0.00931968	0.0224864
676	VIT_214s0036g01020	39834.5	4.86468	0.156781	31.0286	2.22e-211	2.94e-208
677	VIT_213s0047g00100	12.3591	4.86432	1.30597	3.72467	0.000195572	0.000670092
678	VIT_206s0004g00690	47.693	4.86401	1.12696	4.31604	1.59e-05	6.42e-05
679	VIT_200s0527g00030	4.73383	4.85479	1.7014	2.8534	0.00432536	0.0112987
680	VIT_208s0007g08000	8.67737	4.85406	1.50703	3.22095	0.00127768	0.00372696
681	VIT_200s0398g00010	3.43287	4.85154	2.07412	2.33908	0.0193314	0.0428986
682	VIT_211s0118g00600	3.73152	4.85065	1.79528	2.70189	0.00689456	0.0172104
683	VIT_209s0002g00260	18.1408	4.84375	1.0586	4.57562	4.75e-06	2.06e-05
684	VIT_213s0019g03300	3.69113	4.84301	1.79865	2.69259	0.00709004	0.0176539
685	VIT_215s0046g03430	28.3222	4.84282	0.924292	5.2395	1.61e-07	8.37e-07
686	VIT_202s0012g00400	397.994	4.84107	0.488485	9.91037	3.75e-23	5.41e-22
687	VIT_200s2349g00010	2664.51	4.83067	0.237299	20.3569	4.03e-92	4.42e-90
688	VIT_203s0038g03570	181.332	4.82669	0.410592	11.7554	6.62e-32	1.29e-30
689	VIT_204s0008g01910	9.11342	4.8264	1.55856	3.09671	0.00195678	0.00549736
690	VIT_216s0100g00720	497.578	4.82515	0.301585	15.9993	1.29e-57	5.82e-56
691	VIT_211s0016g01950	4121.42	4.82422	0.167249	28.8445	5.94e-183	4.21e-180
692	VIT_205s0020g03690	1468.73	4.81711	0.302604	15.9189	4.69e-57	2.09e-55
693	VIT_214s0006g00920	267.634	4.81648	0.319657	15.0676	2.64e-51	9.77e-50
694	VIT_205s0077g01050	14.702	4.81395	1.00453	4.79222	1.65e-06	7.59e-06
695	VIT_213s0019g05370	166.643	4.81134	0.397259	12.1113	9.2e-34	1.93e-32
696	VIT_216s0022g00770	4.60473	4.8065	2.07179	2.31998	0.0203422	0.0449007
697	VIT_215s0046g03020	123.378	4.80499	0.507635	9.46545	2.92e-21	3.9e-20
698	VIT_218s0001g02420	3089.84	4.80079	0.209041	22.9658	1.02e-116	1.95e-114
699	VIT_201s0011g06430	6.52615	4.80035	1.7141	2.80051	0.00510222	0.0131242
700	VIT_208s0007g06710	4364.53	4.7974	0.174641	27.4701	4e-166	2.34e-163
701	VIT_208s0007g04860	5866.26	4.795	0.164396	29.1674	5.02e-187	3.99e-184
702	VIT_213s0019g03190	185.029	4.79132	0.395058	12.1281	7.49e-34	1.57e-32
703	VIT_206s0004g08270	10.1305	4.78617	1.3925	3.43709	0.000587992	0.0018369
704	VIT_216s0039g01070	195.321	4.77873	0.495057	9.65289	4.78e-22	6.55e-21
705	VIT_208s0007g00960	8.15397	4.77621	1.3663	3.49572	0.000472792	0.00150351
706	VIT_207s0005g04420	1530.83	4.7759	0.164586	29.0176	3.95e-185	3.01e-182
707	VIT_200s2372g00005	2.6983	4.77531	1.9064	2.50488	0.0122492	0.0286039
708	VIT_207s0005g02110	7104.41	4.76785	0.177772	26.8201	1.89e-158	8.91e-156
709	VIT_201s0010g00060	539.778	4.75627	0.513679	9.25922	2.06e-20	2.66e-19
710	VIT_217s0000g04760	1880.05	4.75575	0.477242	9.96507	2.17e-23	3.14e-22
711	VIT_214s0060g02170	2932.51	4.73927	0.415264	11.4127	3.61e-30	6.68e-29
712	VIT_218s0001g06610	970.107	4.73852	0.248174	19.0936	2.85e-81	2.44e-79
713	VIT_218s0122g00180	3192.72	4.73246	0.248489	19.045	7.23e-81	6.08e-79
714	VIT_218s0001g13400	5.31481	4.72929	1.86201	2.53988	0.0110889	0.0261855
715	VIT_208s0007g00100	61.3102	4.72806	0.5261	8.98699	2.54e-19	3.12e-18
716	VIT_208s0058g00120	1259.84	4.72737	0.230454	20.5133	1.64e-93	1.87e-91
717	VIT_208s0007g05830	8.98918	4.72424	1.67571	2.81925	0.00481359	0.0124511
718	VIT_204s0023g01150	84.7044	4.72308	0.538246	8.77495	1.71e-18	2e-17
719	VIT_208s0007g04000	98.3674	4.71915	0.503397	9.37461	6.94e-21	9.09e-20
720	VIT_202s0025g01240	1784.36	4.71719	0.196328	24.0271	1.45e-127	3.64e-125
721	VIT_208s0217g00090	3153.82	4.71541	0.187487	25.1506	1.39e-139	4.52e-137
722	VIT_202s0025g00120	7.26063	4.71007	1.50911	3.12109	0.0018018	0.00510137
723	VIT_203s0091g00580	211.726	4.70717	0.426449	11.0381	2.5e-28	4.34e-27
724	VIT_216s0098g00760	6538.86	4.70605	0.183717	25.6158	1.02e-144	3.74e-142
725	VIT_200s0179g00260	1633.44	4.70574	0.252679	18.6234	2.08e-77	1.59e-75
726	VIT_200s0231g00070	149.307	4.70479	0.374643	12.5581	3.59e-36	8.2e-35
727	VIT_216s0050g00980	220.34	4.70322	0.402848	11.6749	1.71e-31	3.29e-30
728	VIT_211s0016g03900	499.297	4.70185	0.278492	16.8832	5.98e-64	3.27e-62
729	VIT_213s0019g03990	2541.6	4.69864	0.196776	23.8781	5.17e-126	1.22e-123
730	VIT_208s0007g04510	74.7035	4.69714	0.474715	9.89465	4.39e-23	6.3e-22
731	VIT_203s0017g01460	44.1973	4.69498	0.832718	5.63814	1.72e-08	9.84e-08
732	VIT_200s1322g00010	16.2426	4.69343	1.14395	4.10282	4.08e-05	0.000155265
733	VIT_219s0014g01220	17.6041	4.69185	1.16861	4.01488	5.95e-05	0.000221292
734	VIT_207s0129g00230	3.0844	4.69129	1.80973	2.59226	0.00953473	0.0229439
735	VIT_207s0104g00500	4.14098	4.68671	1.84929	2.53433	0.0112663	0.0265634
736	VIT_210s0003g01100	13.6858	4.67301	1.47724	3.16334	0.00155973	0.00447628
737	VIT_206s0004g03980	18.0307	4.67296	0.921418	5.07149	3.95e-07	1.96e-06
738	VIT_216s0100g00380	2305.56	4.6722	0.479657	9.7407	2.02e-22	2.83e-21
739	VIT_202s0033g01380	2672.97	4.66987	0.284629	16.4069	1.71e-60	8.33e-59
740	VIT_211s0016g04810	11.9045	4.66978	1.24703	3.74471	0.000180599	0.000621837
741	VIT_210s0597g00010	3.06304	4.66886	1.84406	2.53184	0.0113466	0.026724
742	VIT_200s0590g00015	3.94685	4.6628	1.94856	2.39295	0.0167137	0.0376879
743	VIT_212s0134g00490	403.492	4.65949	0.365029	12.7647	2.58e-37	6.1e-36
744	VIT_205s0020g03680	7.3659	4.65665	1.488	3.12946	0.00175129	0.00496972
745	VIT_206s0009g01770	23.5978	4.6565	1.10306	4.22143	2.43e-05	9.57e-05
746	VIT_219s0014g02120	35.6549	4.64963	0.905734	5.13355	2.84e-07	1.44e-06
747	VIT_211s0016g04490	1085.11	4.64639	0.236453	19.6504	5.74e-86	5.64e-84
748	VIT_201s0011g03850	580.002	4.64356	0.287192	16.1688	8.37e-59	3.92e-57
749	VIT_203s0017g01300	2085.08	4.6416	0.586749	7.91071	2.56e-15	2.48e-14
750	VIT_218s0001g05810	629.906	4.63872	0.249317	18.6057	2.89e-77	2.21e-75
751	VIT_212s0059g01640	24.7061	4.63599	1.00769	4.6006	4.21e-06	1.84e-05
752	VIT_218s0001g07610	113.207	4.63591	0.47723	9.71419	2.62e-22	3.65e-21
753	VIT_208s0007g00130	63777.9	4.63546	0.183366	25.2799	5.32e-141	1.79e-138
754	VIT_209s0002g07010	38.2793	4.63483	0.690674	6.7106	1.94e-11	1.44e-10
755	VIT_217s0000g08590	57.1846	4.63185	0.77269	5.99444	2.04e-09	1.29e-08
756	VIT_213s0019g03630	120.429	4.62621	0.446713	10.3561	3.93e-25	6.1e-24
757	VIT_203s0180g00210	317.426	4.62579	0.303245	15.2543	1.54e-52	5.98e-51
758	VIT_204s0023g02790	3.99598	4.62457	1.90861	2.423	0.0153928	0.0350118
759	VIT_219s0014g05040	1058.88	4.61994	0.242126	19.0807	3.65e-81	3.1e-79
760	VIT_211s0016g00580	708.95	4.61461	0.256396	17.998	2.02e-72	1.35e-70
761	VIT_212s0057g00520	560.06	4.6135	0.266666	17.3007	4.65e-67	2.77e-65
762	VIT_208s0007g05340	32.8967	4.6068	0.766526	6.00997	1.86e-09	1.18e-08
763	VIT_202s0012g01590	51.2329	4.60645	0.692067	6.65606	2.81e-11	2.07e-10
764	VIT_207s0031g02840	306.898	4.60391	0.30222	15.2337	2.11e-52	8.15e-51
765	VIT_200s0691g00010	1234.57	4.59976	0.300421	15.3111	6.45e-53	2.55e-51
766	VIT_212s0028g01240	11.5081	4.5945	1.04669	4.38955	1.14e-05	4.68e-05
767	VIT_203s0063g00030	31.5998	4.5907	0.895232	5.12794	2.93e-07	1.48e-06
768	VIT_218s0075g01040	7.01344	4.58962	1.54907	2.96282	0.00304834	0.00822251
769	VIT_213s0064g01010	4.02941	4.58426	1.72209	2.66203	0.00776719	0.019155
770	VIT_200s0288g00070	15.7005	4.58037	1.5956	2.87063	0.00409659	0.0107516
771	VIT_200s1373g00020	2.31466	4.57911	1.92304	2.38119	0.0172569	0.0387499
772	VIT_206s0004g04010	7246.89	4.57871	0.173378	26.4088	1.09e-153	4.79e-151
773	VIT_214s0060g00760	62.8315	4.57569	0.771283	5.93258	2.98e-09	1.85e-08
774	VIT_218s0001g07100	1555.17	4.56767	0.185605	24.6096	9.98e-134	2.71e-131
775	VIT_210s0003g00260	10625.6	4.56163	0.237772	19.1849	4.95e-82	4.36e-80
776	VIT_218s0089g01030	201.757	4.56146	0.754906	6.04243	1.52e-09	9.7e-09
777	VIT_213s0019g01340	12.0568	4.56132	1.41933	3.21372	0.0013103	0.00381481
778	VIT_210s0042g00700	523.437	4.55625	0.363585	12.5315	5.02e-36	1.14e-34
779	VIT_204s0008g06010	9.35372	4.55555	1.15212	3.95405	7.68e-05	0.000280996
780	VIT_205s0077g00635	44.5203	4.55273	0.586272	7.76555	8.13e-15	7.68e-14
781	VIT_210s0003g01220	9.20408	4.55055	1.57129	2.89607	0.00377869	0.00998364
782	VIT_218s0041g00710	643.749	4.54898	0.310341	14.658	1.2e-48	4.12e-47
783	VIT_204s0008g05510	3582.93	4.54511	0.242669	18.7297	2.84e-78	2.21e-76
784	VIT_215s0107g00210	87.0873	4.53485	0.57279	7.91713	2.43e-15	2.36e-14
785	VIT_206s0004g06930	4.73597	4.53238	1.68355	2.69216	0.00709919	0.0176741
786	VIT_207s0005g01970	2903.2	4.52936	0.222767	20.3323	6.67e-92	7.23e-90
787	VIT_218s0001g11130	959.589	4.52387	0.307699	14.7023	6.23e-49	2.16e-47
788	VIT_218s0041g02270	181.103	4.51366	0.361368	12.4905	8.42e-36	1.89e-34
789	VIT_218s0001g00470	66.1179	4.51248	1.10936	4.06765	4.75e-05	0.000178946
790	VIT_213s0067g00380	12.614	4.51085	1.16855	3.8602	0.000113294	0.000403387
791	VIT_217s0000g07630	14.9477	4.50886	0.946894	4.76174	1.92e-06	8.74e-06
792	VIT_217s0000g09480	426.908	4.50086	0.259013	17.377	1.23e-67	7.44e-66
793	VIT_202s0033g00305	3.85714	4.49849	1.97802	2.27424	0.0229518	0.04988
794	VIT_207s0151g00280	1779.8	4.49437	0.245537	18.3043	7.65e-75	5.35e-73
795	VIT_203s0017g00650	2983.97	4.4923	0.241881	18.5723	5.38e-77	4.05e-75
796	VIT_200s0487g00050	7661.81	4.4919	0.182027	24.6771	1.88e-134	5.34e-132
797	VIT_214s0060g02150	462.711	4.49111	0.26764	16.7804	3.4e-63	1.81e-61
798	VIT_213s0067g02500	6066.4	4.48978	0.267688	16.7724	3.88e-63	2.06e-61
799	VIT_203s0038g03600	12.7608	4.48931	1.1713	3.83275	0.000126717	0.000448125
800	VIT_207s0031g00040	34.6377	4.48534	0.713649	6.28508	3.28e-10	2.21e-09
801	VIT_218s0001g13510	27.3869	4.48211	0.80996	5.53374	3.13e-08	1.75e-07
802	VIT_213s0067g01270	2536.22	4.47361	0.189271	23.636	1.64e-123	3.79e-121
803	VIT_214s0066g02350	1743.99	4.47082	0.189615	23.5783	6.43e-123	1.43e-120
804	VIT_214s0030g01230	68.1564	4.46818	0.566603	7.88592	3.12e-15	3.02e-14
805	VIT_207s0141g00890	664.639	4.46767	0.464452	9.61923	6.63e-22	9.03e-21
806	VIT_215s0048g02510	5.37613	4.463	1.70507	2.61749	0.0088579	0.0215003
807	VIT_208s0040g01370	3724.72	4.46275	0.19228	23.2096	3.64e-119	7.31e-117
808	VIT_200s2376g00010	651.458	4.46267	0.235219	18.9724	2.89e-80	2.4e-78
809	VIT_201s0137g00330	12.4046	4.45506	1.26116	3.53251	0.000411631	0.00132472
810	VIT_201s0011g06565	9.51429	4.4533	1.67752	2.65469	0.0079382	0.0195282
811	VIT_200s0220g00150	26.4911	4.45306	0.774128	5.75235	8.8e-09	5.19e-08
812	VIT_208s0007g02380	71.7476	4.45258	0.622232	7.15581	8.32e-13	6.85e-12
813	VIT_219s0015g00130	3193.25	4.44827	0.170625	26.0705	7.88e-150	3.26e-147
814	VIT_208s0007g07250	4.27536	4.44664	1.74635	2.54624	0.0108889	0.0257653
815	VIT_212s0028g01230	32.8473	4.44432	0.730586	6.08323	1.18e-09	7.59e-09
816	VIT_218s0001g02490	8.44781	4.44396	1.53892	2.88772	0.00388042	0.0102306
817	VIT_217s0000g04360	135.457	4.44395	0.485053	9.16179	5.1e-20	6.49e-19
818	VIT_203s0017g02000	1480.61	4.43702	0.307449	14.4317	3.27e-47	1.09e-45
819	VIT_208s0105g00180	973.242	4.43618	0.240203	18.4685	3.7e-76	2.67e-74
820	VIT_200s0731g00010	7.4109	4.43484	1.74681	2.53882	0.0111226	0.0262587
821	VIT_209s0002g01110	32.8193	4.43189	0.890932	4.97445	6.54e-07	3.17e-06
822	VIT_214s0066g01220	8.3232	4.42933	1.47891	2.995	0.00274449	0.00747606
823	VIT_200s1286g00010	2134.41	4.42751	0.429621	10.3056	6.65e-25	1.02e-23
824	VIT_212s0034g02470	5.90553	4.41932	1.54774	2.85533	0.00429924	0.0112363
825	VIT_218s0001g06560	473.232	4.4079	0.302087	14.5915	3.18e-48	1.08e-46
826	VIT_214s0066g02470	89.4639	4.39871	0.499279	8.81012	1.25e-18	1.47e-17
827	VIT_204s0069g00060	10.1431	4.39871	1.53233	2.8706	0.004097	0.0107516
828	VIT_211s0016g04760	390.896	4.39443	0.301005	14.5992	2.84e-48	9.69e-47
829	VIT_213s0019g02780	20954.3	4.38529	0.266629	16.4471	8.79e-61	4.32e-59
830	VIT_208s0040g01110	43.6994	4.38424	1.20671	3.63323	0.000279901	0.000931907
831	VIT_206s0004g03615	8.82893	4.3839	1.49879	2.92496	0.00344502	0.00918147
832	VIT_206s0080g01230	26290.7	4.38067	0.176246	24.8554	2.26e-136	6.7e-134
833	VIT_214s0060g02390	395.916	4.37856	0.283068	15.4682	5.69e-54	2.33e-52
834	VIT_203s0180g00030	2555.46	4.37482	0.174453	25.0774	8.77e-139	2.81e-136
835	VIT_214s0068g01190	849.134	4.37412	0.262477	16.6648	2.36e-62	1.21e-60
836	VIT_212s0059g01480	10.986	4.37074	1.18181	3.69835	0.000217008	0.000737857
837	VIT_203s0088g01180	1410.67	4.3689	0.447313	9.76699	1.56e-22	2.19e-21
838	VIT_210s0003g02030	1292.31	4.36478	0.211391	20.648	1.02e-94	1.2e-92
839	VIT_208s0040g03040	1707.76	4.36247	0.248184	17.5776	3.66e-69	2.29e-67
840	VIT_205s0049g01020	321.731	4.35251	0.559991	7.77246	7.7e-15	7.29e-14
841	VIT_200s2648g00010	161.486	4.35094	0.319915	13.6003	3.99e-42	1.11e-40
842	VIT_208s0007g05880	2577.24	4.3449	0.223019	19.4822	1.55e-84	1.46e-82
843	VIT_200s0260g00070	140.767	4.3441	0.435767	9.96886	2.09e-23	3.02e-22
844	VIT_214s0066g02060	5507.38	4.34228	0.166268	26.1162	2.39e-150	1.01e-147
845	VIT_208s0007g02360	4914.05	4.33796	0.288511	15.0357	4.28e-51	1.58e-49
846	VIT_219s0014g04380	7.90743	4.33545	1.71129	2.53345	0.0112947	0.0266144
847	VIT_203s0017g02110	935.4	4.32881	0.305684	14.1611	1.6e-45	4.99e-44
848	VIT_206s0004g03540	2645.26	4.32714	0.257576	16.7995	2.46e-63	1.32e-61
849	VIT_206s0009g03670	765.031	4.32293	0.202659	21.3311	5.84e-101	7.53e-99
850	VIT_214s0081g00730	59.6317	4.31705	0.557633	7.74173	9.81e-15	9.22e-14
851	VIT_201s0011g03500	98.6103	4.31482	0.610175	7.07146	1.53e-12	1.24e-11
852	VIT_201s0011g00690	7739.23	4.31378	0.223613	19.2913	6.36e-83	5.71e-81
853	VIT_200s2849g00010	29.0258	4.30912	1.60081	2.69184	0.00710589	0.0176868
854	VIT_218s0001g13610	3165.71	4.30842	0.17829	24.1652	5.17e-129	1.33e-126
855	VIT_212s0059g00280	466.842	4.30476	0.320467	13.4328	3.89e-41	1.05e-39
856	VIT_213s0047g00110	888.787	4.30419	0.319082	13.4893	1.81e-41	4.93e-40
857	VIT_204s0008g02120	158.662	4.30123	0.442145	9.7281	2.29e-22	3.19e-21
858	VIT_211s0016g05420	79.1991	4.2981	0.464497	9.25324	2.18e-20	2.81e-19
859	VIT_201s0026g00280	2216.33	4.29749	0.27383	15.694	1.66e-55	7.07e-54
860	VIT_206s0004g04470	82503.4	4.29436	0.219355	19.5772	2.42e-85	2.34e-83
861	VIT_213s0064g01660	82.6616	4.2926	1.16223	3.69341	0.000221268	0.000750285
862	VIT_214s0006g02820	504.118	4.29151	0.23226	18.4772	3.15e-76	2.28e-74
863	VIT_213s0019g02850	3372.26	4.29103	0.279981	15.3262	5.11e-53	2.02e-51
864	VIT_202s0033g01000	10459.7	4.29041	0.180499	23.7697	6.88e-125	1.61e-122
865	VIT_218s0001g02030	35.4424	4.29019	0.85373	5.02523	5.03e-07	2.47e-06
866	VIT_200s0179g00150	9484.71	4.28995	0.257088	16.6867	1.64e-62	8.44e-61
867	VIT_218s0001g00290	3645.29	4.28708	0.160598	26.6946	5.44e-157	2.51e-154
868	VIT_200s0189g00050	58.0574	4.28619	0.735482	5.82773	5.62e-09	3.39e-08
869	VIT_200s0615g00020	834.343	4.27855	0.230445	18.5665	6e-77	4.5e-75
870	VIT_214s0108g00450	10.0172	4.27809	1.18592	3.60739	0.000309295	0.00102155
871	VIT_207s0197g00096	2084.13	4.27766	0.243064	17.5989	2.51e-69	1.58e-67
872	VIT_206s0004g01580	71.1598	4.27439	0.54749	7.80726	5.84e-15	5.57e-14
873	VIT_200s0301g00090	411.056	4.26859	0.607897	7.0219	2.19e-12	1.74e-11
874	VIT_218s0001g09350	12.8464	4.26473	1.13907	3.74405	0.000181077	0.000623267
875	VIT_207s0129g00180	12176.3	4.25881	0.171417	24.8447	2.95e-136	8.61e-134
876	VIT_207s0005g01980	1689.79	4.25633	0.375397	11.3382	8.49e-30	1.55e-28
877	VIT_201s0011g00440	628.389	4.25558	0.258495	16.4629	6.78e-61	3.34e-59
878	VIT_211s0016g00670	451.038	4.2493	0.358136	11.865	1.8e-32	3.58e-31
879	VIT_202s0012g00150	1675.52	4.24754	0.279354	15.2049	3.28e-52	1.25e-50
880	VIT_218s0001g04150	1025.59	4.24465	0.203318	20.8769	8.68e-97	1.04e-94
881	VIT_217s0000g02085	252.059	4.24127	0.306861	13.8215	1.89e-43	5.51e-42
882	VIT_204s0008g01110	14388.4	4.23613	0.241177	17.5645	4.61e-69	2.87e-67
883	VIT_207s0129g00110	3361.98	4.23365	0.207957	20.3582	3.92e-92	4.35e-90
884	VIT_210s0003g00410	719.265	4.23316	0.297427	14.2326	5.75e-46	1.82e-44
885	VIT_219s0014g01710	1448.9	4.23165	0.208051	20.3395	5.75e-92	6.28e-90
886	VIT_200s0333g00040	15.3538	4.23149	0.884196	4.7857	1.7e-06	7.82e-06
887	VIT_211s0016g00660	2768.17	4.22476	0.233211	18.1156	2.4e-73	1.63e-71
888	VIT_205s0020g04090	22.2575	4.22216	1.0486	4.02646	5.66e-05	0.000211313
889	VIT_212s0059g01340	1052.64	4.21958	0.251417	16.7832	3.24e-63	1.73e-61
890	VIT_216s0100g00990	36.6012	4.21899	1.08797	3.87784	0.000105389	0.000377134
891	VIT_214s0108g00590	3058.16	4.21817	0.242851	17.3694	1.41e-67	8.47e-66
892	VIT_203s0132g00090	73.9673	4.21662	0.685604	6.15023	7.74e-10	5.07e-09
893	VIT_203s0038g03400	81.4128	4.21236	0.898154	4.69002	2.73e-06	1.22e-05
894	VIT_214s0083g00980	4.19334	4.21201	1.82085	2.31321	0.0207111	0.0456339
895	VIT_218s0001g01310	1186.76	4.21157	0.294083	14.321	1.62e-46	5.22e-45
896	VIT_205s0020g04390	892.451	4.21059	0.333482	12.6262	1.51e-36	3.52e-35
897	VIT_207s0005g00820	1011.38	4.20755	0.327528	12.8464	9.01e-38	2.15e-36
898	VIT_211s0016g01280	5.8252	4.20372	1.79465	2.34236	0.0191624	0.042557
899	VIT_201s0011g04200	1164.69	4.19805	0.275954	15.2129	2.9e-52	1.11e-50
900	VIT_200s0262g00080	40.4221	4.19464	0.731931	5.73092	9.99e-09	5.87e-08
901	VIT_207s0104g00470	7.74023	4.19205	1.56368	2.68089	0.00734276	0.0182238
902	VIT_208s0105g00190	2262.6	4.18297	0.2429	17.221	1.85e-66	1.08e-64
903	VIT_213s0019g03170	2980.47	4.18221	0.212738	19.6589	4.85e-86	4.79e-84
904	VIT_214s0030g01510	9.65276	4.17652	1.46514	2.85059	0.0043638	0.0113755
905	VIT_201s0011g01360	2072.04	4.16956	0.214221	19.4639	2.22e-84	2.07e-82
906	VIT_207s0104g00350	91.4793	4.16621	0.810274	5.14172	2.72e-07	1.38e-06
907	VIT_206s0061g00730	25.9195	4.15995	1.31641	3.16008	0.00157726	0.00451839
908	VIT_200s1372g00020	4.47285	4.15435	1.63368	2.54294	0.0109925	0.0259824
909	VIT_206s0004g02410	1731.02	4.15418	0.180958	22.9566	1.27e-116	2.39e-114
910	VIT_218s0041g01290	5935.4	4.14308	0.241005	17.1908	3.11e-66	1.79e-64
911	VIT_208s0007g04180	7.1109	4.141	1.22694	3.37506	0.000738008	0.00226037
912	VIT_205s0020g03140	12807	4.13944	0.213697	19.3707	1.37e-83	1.24e-81
913	VIT_204s0008g04480	4906.65	4.12585	0.124435	33.1567	4.53e-241	1.29e-237
914	VIT_203s0038g04390	11.0197	4.11803	1.11772	3.68431	0.000229322	0.000774287
915	VIT_204s0069g00200	12.5489	4.11752	0.955049	4.31132	1.62e-05	6.55e-05
916	VIT_200s0353g00050	1332.53	4.11533	0.213402	19.2844	7.27e-83	6.5e-81
917	VIT_201s0026g02470	1523.03	4.11454	0.257504	15.9786	1.8e-57	8.08e-56
918	VIT_212s0059g01060	4339.52	4.11362	0.224201	18.3479	3.43e-75	2.43e-73
919	VIT_200s0958g00020	3769.22	4.11107	0.201298	20.4228	1.05e-92	1.18e-90
920	VIT_208s0007g08610	35.3298	4.11012	0.700267	5.86936	4.37e-09	2.67e-08
921	VIT_208s0040g03100	2707.32	4.10687	0.205313	20.003	5.19e-89	5.39e-87
922	VIT_218s0001g00990	29.1844	4.10398	0.681899	6.01847	1.76e-09	1.12e-08
923	VIT_209s0002g02740	6.83951	4.10181	1.51398	2.70928	0.00674294	0.016868
924	VIT_204s0008g05760	8451.62	4.09772	0.18178	22.5422	1.6e-112	2.7e-110
925	VIT_211s0016g05110	10.8225	4.09751	1.53586	2.66789	0.00763282	0.0188447
926	VIT_218s0001g02480	275.097	4.09621	0.323936	12.6451	1.19e-36	2.78e-35
927	VIT_218s0001g00730	9.3507	4.09067	1.30885	3.1254	0.00177565	0.0050345
928	VIT_213s0147g00160	12.8596	4.08805	1.15644	3.53504	0.000407719	0.00131426
929	VIT_218s0072g00550	9295.33	4.08796	0.184542	22.1519	1e-108	1.55e-106
930	VIT_207s0031g01700	333.152	4.08402	0.296647	13.7673	4.01e-43	1.15e-41
931	VIT_219s0014g02270	4.82084	4.08055	1.66678	2.44817	0.0143584	0.0328925
932	VIT_203s0038g00470	17.9708	4.07589	0.8383	4.86209	1.16e-06	5.46e-06
933	VIT_218s0001g08610	34.3586	4.07587	0.616003	6.61664	3.67e-11	2.66e-10
934	VIT_202s0025g01280	3534.72	4.07539	0.252233	16.1572	1.01e-58	4.66e-57
935	VIT_208s0058g00540	9.85046	4.07185	1.16496	3.49527	0.000473577	0.00150552
936	VIT_206s0004g05020	804.312	4.06833	0.271514	14.9839	9.36e-51	3.42e-49
937	VIT_212s0178g00160	4.99263	4.06824	1.74642	2.32947	0.0198341	0.0438957
938	VIT_208s0007g05050	6.05228	4.06392	1.68764	2.40804	0.0160383	0.0363206
939	VIT_212s0057g00420	3619.73	4.06338	0.169866	23.921	1.85e-126	4.48e-124
940	VIT_215s0048g02070	1398.75	4.05716	0.445761	9.10166	8.9e-20	1.12e-18
941	VIT_204s0069g00880	7.66056	4.05207	1.74344	2.32418	0.0201159	0.0444458
942	VIT_205s0020g02040	33.2379	4.04865	0.952677	4.24976	2.14e-05	8.51e-05
943	VIT_205s0049g01750	857.289	4.04841	0.214408	18.8818	1.61e-79	1.29e-77
944	VIT_203s0091g00470	646.961	4.04812	0.264721	15.292	8.64e-53	3.4e-51
945	VIT_202s0025g02540	18.9962	4.04788	1.27792	3.16754	0.00153732	0.00441618
946	VIT_204s0008g06590	5.92743	4.04217	1.69154	2.38964	0.0168648	0.037994
947	VIT_216s0098g00200	830.463	4.0421	0.23049	17.537	7.48e-69	4.61e-67
948	VIT_200s1356g00010	38.1494	4.04025	0.702557	5.75077	8.88e-09	5.24e-08
949	VIT_213s0064g01440	6.35829	4.04022	1.62179	2.49121	0.012731	0.0295925
950	VIT_215s0046g01570	591.281	4.03835	0.238567	16.9275	2.82e-64	1.56e-62
951	VIT_201s0026g01580	8.4025	4.03736	1.43132	2.82071	0.0047917	0.0123977
952	VIT_205s0094g00360	2192.47	4.03701	0.416843	9.68473	3.5e-22	4.84e-21
953	VIT_218s0001g04130	10.3526	4.03656	1.43974	2.80367	0.00505241	0.0130044
954	VIT_211s0016g05770	5096.24	4.03503	0.209376	19.2717	9.28e-83	8.26e-81
955	VIT_200s0615g00030	31349.8	4.03369	0.14933	27.012	1.07e-160	5.43e-158
956	VIT_200s0769g00010	14000.5	4.03339	0.17337	23.2646	1.01e-119	2.07e-117
957	VIT_209s0002g05570	502.698	4.03173	0.301449	13.3745	8.52e-41	2.25e-39
958	VIT_200s0264g00020	1180.19	4.02908	0.249846	16.1262	1.67e-58	7.65e-57
959	VIT_206s0061g00440	1136.92	4.02757	0.320317	12.5737	2.95e-36	6.75e-35
960	VIT_207s0129g00760	67.5756	4.02396	0.925681	4.34703	1.38e-05	5.62e-05
961	VIT_211s0052g01780	58.0452	4.02094	0.741186	5.42501	5.79e-08	3.14e-07
962	VIT_216s0039g02020	2418.9	4.02077	0.360399	11.1565	6.66e-29	1.18e-27
963	VIT_201s0011g01810	51.9985	4.0159	0.592744	6.7751	1.24e-11	9.38e-11
964	VIT_212s0028g00610	375.957	4.0119	0.293289	13.679	1.36e-42	3.81e-41
965	VIT_216s0050g00400	91.2717	4.01023	0.519962	7.71254	1.23e-14	1.15e-13
966	VIT_208s0056g01530	27.3439	4.00665	0.868097	4.61544	3.92e-06	1.72e-05
967	VIT_212s0057g00250	97.4554	4.00448	0.388622	10.3043	6.74e-25	1.03e-23
968	VIT_206s0004g01510	10662.5	3.9994	0.461358	8.66875	4.37e-18	4.97e-17
969	VIT_205s0094g00966	8.60556	3.99884	1.19713	3.34037	0.000836672	0.00253247
970	VIT_200s0434g00010	23.2145	3.99438	0.768554	5.19727	2.02e-07	1.04e-06
971	VIT_213s0019g01280	7.59174	3.99322	1.68269	2.37312	0.0176387	0.0395237
972	VIT_216s0013g00390	95.5118	3.99023	0.561098	7.11147	1.15e-12	9.32e-12
973	VIT_204s0008g04710	7.36184	3.98666	1.38409	2.88036	0.00397227	0.010452
974	VIT_208s0007g01560	2088.25	3.97583	0.242486	16.3962	2.04e-60	9.91e-59
975	VIT_218s0001g12520	4786	3.97578	0.352382	11.2826	1.6e-29	2.9e-28
976	VIT_204s0044g01500	8.08741	3.97538	1.13835	3.49224	0.000478996	0.00152178
977	VIT_204s0008g00800	2537.85	3.97433	0.213628	18.604	2.98e-77	2.27e-75
978	VIT_211s0016g02126	766.308	3.97142	0.286186	13.877	8.73e-44	2.57e-42
979	VIT_208s0007g08900	7.43412	3.97046	1.18736	3.34393	0.000826017	0.00250251
980	VIT_202s0025g01320	11020.2	3.96834	0.183052	21.6787	3.26e-104	4.55e-102
981	VIT_214s0068g02010	30.7836	3.96726	0.760358	5.21762	1.81e-07	9.38e-07
982	VIT_218s0001g06310	2096.58	3.95948	0.183343	21.596	1.96e-103	2.66e-101
983	VIT_205s0020g00670	14651.8	3.9538	0.170936	23.1303	2.3e-118	4.56e-116
984	VIT_218s0001g05530	230.635	3.95175	0.395498	9.99183	1.65e-23	2.41e-22
985	VIT_218s0001g01300	281.55	3.94804	0.421284	9.37144	7.16e-21	9.36e-20
986	VIT_217s0000g06620	8.38853	3.94768	1.69643	2.32705	0.0199627	0.0441515
987	VIT_217s0000g09760	144.488	3.94391	0.445353	8.85569	8.32e-19	9.88e-18
988	VIT_205s0077g01470	3771.41	3.94188	0.231926	16.9962	8.76e-65	4.87e-63
989	VIT_213s0064g00050	1816.02	3.93929	0.182504	21.5847	2.5e-103	3.38e-101
990	VIT_218s0001g10080	335.115	3.93583	0.292836	13.4404	3.51e-41	9.46e-40
991	VIT_209s0002g08110	9.88365	3.93524	1.43321	2.74575	0.0060373	0.0152741
992	VIT_215s0048g00860	23.8688	3.93447	0.90594	4.34297	1.41e-05	5.72e-05
993	VIT_214s0128g00190	7.25175	3.93335	1.42813	2.7542	0.00588353	0.0149269
994	VIT_208s0007g05940	218.963	3.93139	0.272525	14.4258	3.56e-47	1.18e-45
995	VIT_200s2851g00010	2068.17	3.91825	0.834882	4.69318	2.69e-06	1.2e-05
996	VIT_214s0108g01450	211.615	3.91365	0.359374	10.8902	1.28e-27	2.17e-26
997	VIT_210s0003g04230	133.348	3.90945	0.604157	6.47092	9.74e-11	6.83e-10
998	VIT_219s0093g00550	2580.5	3.90827	0.419158	9.32409	1.12e-20	1.46e-19
999	VIT_212s0059g01080	66.2012	3.90777	0.498137	7.84478	4.34e-15	4.16e-14
1000	VIT_209s0002g05850	228.936	3.90482	0.308347	12.6637	9.39e-37	2.2e-35
1001	VIT_204s0079g00790	1113.73	3.90481	0.386325	10.1076	5.11e-24	7.58e-23
1002	VIT_217s0000g09495	7.53159	3.90399	1.60747	2.42866	0.0151548	0.0345338
1003	VIT_208s0040g01390	6.03347	3.90022	1.36717	2.85277	0.00433396	0.0113151
1004	VIT_205s0049g00210	487.125	3.89425	0.272053	14.3143	1.78e-46	5.72e-45
1005	VIT_205s0077g00730	458.713	3.89286	0.286725	13.577	5.48e-42	1.51e-40
1006	VIT_205s0049g00460	121.943	3.88242	0.500368	7.75912	8.55e-15	8.06e-14
1007	VIT_216s0100g00900	483.952	3.88132	0.734311	5.28567	1.25e-07	6.58e-07
1008	VIT_203s0132g00050	2918.07	3.87252	0.288265	13.4339	3.83e-41	1.03e-39
1009	VIT_208s0040g01540	81.9736	3.86933	0.510642	7.57738	3.53e-14	3.19e-13
1010	VIT_207s0031g02400	156.637	3.86849	0.433902	8.91559	4.85e-19	5.87e-18
1011	VIT_204s0008g06730	306.067	3.86823	0.251927	15.3546	3.3e-53	1.32e-51
1012	VIT_219s0014g00840	31.1951	3.86565	0.84301	4.58554	4.53e-06	1.97e-05
1013	VIT_218s0001g10870	13.8496	3.86088	1.02087	3.78195	0.000155604	0.00054236
1014	VIT_201s0127g00680	83.6665	3.86027	0.549009	7.03135	2.05e-12	1.63e-11
1015	VIT_218s0001g01500	28.0965	3.84248	0.72447	5.30385	1.13e-07	5.98e-07
1016	VIT_201s0137g00700	20.0093	3.83931	1.12394	3.41593	0.000635648	0.00197212
1017	VIT_208s0058g00690	3650.63	3.8388	0.262637	14.6164	2.21e-48	7.57e-47
1018	VIT_200s0533g00010	35.3194	3.83809	0.92913	4.13084	3.61e-05	0.000138745
1019	VIT_201s0026g00190	809.396	3.8332	0.280476	13.6668	1.6e-42	4.49e-41
1020	VIT_212s0057g01440	60.9666	3.8285	0.613414	6.24131	4.34e-10	2.91e-09
1021	VIT_216s0098g00210	57.9172	3.82759	0.826932	4.62867	3.68e-06	1.62e-05
1022	VIT_219s0014g02850	169.105	3.82467	0.412658	9.26839	1.89e-20	2.44e-19
1023	VIT_202s0012g02000	6.12305	3.82291	1.42506	2.68262	0.00730476	0.0181385
1024	VIT_218s0001g01130	12.2773	3.81765	1.00341	3.80468	0.000141985	0.000497424
1025	VIT_210s0003g05430	12.4085	3.81757	1.18152	3.23106	0.00123333	0.00360714
1026	VIT_215s0046g01560	60977.6	3.8112	0.221973	17.1696	4.48e-66	2.55e-64
1027	VIT_208s0007g00830	34.8071	3.81004	0.837468	4.54948	5.38e-06	2.31e-05
1028	VIT_200s0181g00120	402.741	3.8098	0.261362	14.5767	3.95e-48	1.34e-46
1029	VIT_200s0181g00220	126.143	3.80932	0.378527	10.0635	8.01e-24	1.18e-22
1030	VIT_218s0089g01200	13.0269	3.80646	1.0675	3.56576	0.000362803	0.00117905
1031	VIT_206s0004g07500	10548.7	3.80578	0.208124	18.2862	1.07e-74	7.43e-73
1032	VIT_209s0002g05830	235.831	3.80496	0.332167	11.455	2.22e-30	4.13e-29
1033	VIT_218s0041g00280	3949.97	3.80285	0.174499	21.793	2.7e-105	3.95e-103
1034	VIT_212s0028g01730	153.254	3.80223	0.366304	10.38	3.06e-25	4.78e-24
1035	VIT_200s0233g00010	10.0847	3.79243	1.01927	3.72072	0.000198657	0.000680005
1036	VIT_202s0025g02920	86.9767	3.78596	0.553947	6.83452	8.23e-12	6.28e-11
1037	VIT_204s0008g05700	157.166	3.78382	0.306659	12.3389	5.59e-35	1.22e-33
1038	VIT_201s0011g03430	275.761	3.77785	0.370218	10.2044	1.89e-24	2.86e-23
1039	VIT_208s0007g05160	92.0645	3.77738	0.568454	6.64499	3.03e-11	2.22e-10
1040	VIT_207s0005g03190	24.2047	3.77565	0.753268	5.01236	5.38e-07	2.63e-06
1041	VIT_212s0059g01720	76.9328	3.77373	0.579289	6.51443	7.3e-11	5.17e-10
1042	VIT_207s0005g03260	119.623	3.77076	0.914274	4.12433	3.72e-05	0.000142265
1043	VIT_201s0011g05030	431.718	3.76931	0.256297	14.7068	5.83e-49	2.03e-47
1044	VIT_206s0004g04180	1361.22	3.76899	0.183671	20.5204	1.42e-93	1.63e-91
1045	VIT_210s0003g00390	806.847	3.76638	0.291566	12.9177	3.57e-38	8.69e-37
1046	VIT_207s0005g00300	446.34	3.76335	0.199623	18.8523	2.81e-79	2.25e-77
1047	VIT_207s0005g00660	3652.77	3.76142	0.218757	17.1945	2.92e-66	1.68e-64
1048	VIT_210s0003g00490	48.5732	3.76125	0.717539	5.24187	1.59e-07	8.27e-07
1049	VIT_204s0044g01130	54.8018	3.7607	0.452803	8.30538	9.95e-17	1.06e-15
1050	VIT_200s0266g00090	6.07855	3.75851	1.51099	2.48745	0.0128662	0.0298742
1051	VIT_211s0016g01190	1352.16	3.75396	0.223917	16.7649	4.4e-63	2.32e-61
1052	VIT_205s0020g00480	105.627	3.7522	0.513661	7.30481	2.78e-13	2.36e-12
1053	VIT_202s0025g05120	936.083	3.74559	0.250419	14.9573	1.4e-50	5.04e-49
1054	VIT_200s0266g00010	112.965	3.74412	1.0251	3.65244	0.000259763	0.000869674
1055	VIT_212s0035g00340	61.6453	3.74225	0.620966	6.02649	1.68e-09	1.07e-08
1056	VIT_201s0011g00730	342.983	3.73061	0.396294	9.41373	4.79e-21	6.32e-20
1057	VIT_200s0203g00070	133.813	3.72667	0.477001	7.81272	5.6e-15	5.34e-14
1058	VIT_216s0050g02680	21.2741	3.72302	1.08462	3.43255	0.000597935	0.00186408
1059	VIT_205s0077g00280	19080.4	3.71807	0.146919	25.307	2.67e-141	9.15e-139
1060	VIT_208s0007g03690	156.618	3.71666	0.301261	12.337	5.73e-35	1.25e-33
1061	VIT_208s0056g01410	51.0316	3.71621	0.421949	8.80723	1.28e-18	1.51e-17
1062	VIT_202s0025g03300	3922.71	3.7116	0.211656	17.536	7.61e-69	4.68e-67
1063	VIT_218s0001g00450	22.3427	3.70325	0.681184	5.43649	5.43e-08	2.96e-07
1064	VIT_200s0420g00005	11.5051	3.70022	1.22142	3.02943	0.00245015	0.00674556
1065	VIT_211s0016g04080	3134.04	3.69582	0.239263	15.4467	7.94e-54	3.22e-52
1066	VIT_210s0003g01380	7.54873	3.69284	1.28346	2.87725	0.00401164	0.0105472
1067	VIT_212s0059g01380	6541.67	3.6878	0.180323	20.4511	5.87e-93	6.62e-91
1068	VIT_209s0002g04680	11098.5	3.68643	0.135354	27.2355	2.47e-163	1.32e-160
1069	VIT_206s0004g05660	34.107	3.68516	0.869196	4.23973	2.24e-05	8.89e-05
1070	VIT_212s0055g00060	18.745	3.68248	1.09772	3.35466	0.00079463	0.00241516
1071	VIT_203s0088g00620	775.24	3.68151	0.459937	8.00436	1.2e-15	1.19e-14
1072	VIT_211s0065g00350	139.354	3.68122	0.502623	7.32401	2.41e-13	2.06e-12
1073	VIT_203s0038g03530	8109.93	3.67555	0.274828	13.374	8.58e-41	2.26e-39
1074	VIT_201s0011g02480	2493.52	3.67498	0.286064	12.8467	8.98e-38	2.15e-36
1075	VIT_202s0025g02800	44.0591	3.67399	0.619533	5.93026	3.02e-09	1.88e-08
1076	VIT_209s0002g02760	181.585	3.67356	0.516501	7.11239	1.14e-12	9.26e-12
1077	VIT_207s0005g05590	15.9517	3.67346	0.768827	4.77801	1.77e-06	8.1e-06
1078	VIT_200s2681g00005	4.67064	3.67284	1.38652	2.64895	0.0080742	0.0198137
1079	VIT_211s0016g03080	895.597	3.66461	0.279146	13.1279	2.28e-39	5.77e-38
1080	VIT_214s0066g01150	552.786	3.66412	0.264379	13.8594	1.12e-43	3.28e-42
1081	VIT_201s0011g04510	1359.01	3.6638	0.157584	23.2498	1.43e-119	2.9e-117
1082	VIT_212s0028g03010	5613.97	3.66277	0.193322	18.9465	4.72e-80	3.89e-78
1083	VIT_216s0100g01020	124.789	3.66105	0.77136	4.74622	2.07e-06	9.39e-06
1084	VIT_216s0100g01040	66.4754	3.66077	0.809295	4.5234	6.09e-06	2.6e-05
1085	VIT_208s0056g01660	115.611	3.65796	0.400762	9.12751	7.01e-20	8.84e-19
1086	VIT_214s0006g02240	1377.41	3.656	0.192437	18.9985	1.76e-80	1.46e-78
1087	VIT_214s0036g00630	375.07	3.65249	0.222943	16.3831	2.53e-60	1.23e-58
1088	VIT_202s0025g02620	7.80681	3.64781	1.54943	2.35429	0.0185582	0.0413585
1089	VIT_203s0063g00480	3200.33	3.64363	0.211689	17.2122	2.15e-66	1.25e-64
1090	VIT_201s0011g00400	152.598	3.6385	0.380875	9.55301	1.26e-21	1.71e-20
1091	VIT_208s0058g01090	4490.97	3.6376	0.162685	22.3598	9.7e-111	1.59e-108
1092	VIT_218s0001g11290	3288.33	3.63633	0.172789	21.045	2.54e-98	3.15e-96
1093	VIT_211s0052g01220	181.933	3.63361	0.422554	8.59917	8.03e-18	9.01e-17
1094	VIT_208s0056g00210	21.4116	3.62812	1.01764	3.56525	0.000363516	0.00118118
1095	VIT_212s0142g00110	337.748	3.6177	0.278887	12.9719	1.77e-38	4.33e-37
1096	VIT_211s0016g01300	668.698	3.6168	0.300156	12.0497	1.95e-33	4.03e-32
1097	VIT_218s0001g01980	141.391	3.61608	0.33521	10.7875	3.94e-27	6.55e-26
1098	VIT_201s0146g00250	1654.06	3.61215	0.215301	16.7772	3.58e-63	1.9e-61
1099	VIT_203s0038g04100	9134.38	3.61155	0.160633	22.4833	6.05e-112	1e-109
1100	VIT_212s0059g02150	380.288	3.60956	0.263621	13.6923	1.13e-42	3.18e-41
1101	VIT_204s0043g00310	755.405	3.60179	0.224924	16.0133	1.03e-57	4.67e-56
1102	VIT_208s0007g00200	132.976	3.59733	0.379828	9.47095	2.77e-21	3.7e-20
1103	VIT_210s0003g00130	81.3968	3.59403	0.440376	8.16129	3.31e-16	3.41e-15
1104	VIT_203s0063g01820	46.0752	3.59303	1.2061	2.97906	0.00289133	0.00783629
1105	VIT_207s0005g02800	7.9889	3.59229	1.28332	2.79921	0.00512273	0.0131633
1106	VIT_200s1389g00010	13.7107	3.59168	1.4976	2.3983	0.0164716	0.0371842
1107	VIT_211s0037g01020	560.071	3.58999	0.195953	18.3206	5.66e-75	4e-73
1108	VIT_217s0000g00070	7.37878	3.5884	1.21899	2.94375	0.00324262	0.00869811
1109	VIT_218s0001g12310	7.36102	3.58519	1.57405	2.27769	0.0227451	0.0494732
1110	VIT_207s0104g00640	23.2349	3.58425	0.870867	4.11573	3.86e-05	0.00014739
1111	VIT_203s0132g00040	111.284	3.58166	0.449591	7.96649	1.63e-15	1.6e-14
1112	VIT_202s0154g00090	127.746	3.58119	0.704879	5.08058	3.76e-07	1.87e-06
1113	VIT_211s0078g00260	1978.62	3.58098	0.214292	16.7108	1.09e-62	5.7e-61
1114	VIT_204s0023g02290	8.50489	3.5802	1.5696	2.28096	0.0225505	0.0491035
1115	VIT_205s0051g00010	1608	3.57532	0.177071	20.1914	1.17e-90	1.24e-88
1116	VIT_205s0062g00980	291.125	3.57279	0.548661	6.51183	7.42e-11	5.25e-10
1117	VIT_217s0000g02410	27.7272	3.57133	0.730703	4.88752	1.02e-06	4.83e-06
1118	VIT_202s0025g03180	12.5406	3.56889	1.14889	3.10638	0.00189396	0.00534249
1119	VIT_200s1569g00010	1853.57	3.56588	0.248375	14.3568	9.65e-47	3.15e-45
1120	VIT_201s0010g00650	6.97231	3.56425	1.43934	2.47631	0.0132749	0.0306689
1121	VIT_202s0033g00010	5.12035	3.56396	1.37369	2.59445	0.00947436	0.0228208
1122	VIT_207s0031g00670	1540.81	3.56129	0.205394	17.3388	2.4e-67	1.44e-65
1123	VIT_202s0012g01630	810.759	3.55847	0.221833	16.0412	6.59e-58	3e-56
1124	VIT_218s0001g04660	22.6942	3.55656	0.992846	3.58219	0.000340725	0.00111534
1125	VIT_201s0026g01430	2663.27	3.5548	0.213695	16.6349	3.89e-62	1.98e-60
1126	VIT_218s0001g06270	1780.29	3.55466	0.190493	18.6603	1.04e-77	8.04e-76
1127	VIT_219s0014g02350	8.40972	3.55455	1.52345	2.33322	0.0196366	0.0435174
1128	VIT_214s0083g01170	285.906	3.55172	0.282847	12.557	3.64e-36	8.29e-35
1129	VIT_208s0007g05840	8.38162	3.55119	1.40218	2.53262	0.0113215	0.0266681
1130	VIT_218s0001g06020	208.129	3.54968	0.595453	5.96132	2.5e-09	1.57e-08
1131	VIT_212s0034g01230	22.2179	3.54923	0.991268	3.58049	0.000342944	0.00112149
1132	VIT_209s0002g05600	17287.4	3.54681	0.253376	13.9982	1.6e-44	4.83e-43
1133	VIT_214s0108g00890	971.602	3.54438	0.257272	13.7768	3.52e-43	1.01e-41
1134	VIT_214s0066g01190	584.217	3.54305	0.266929	13.2734	3.3e-40	8.55e-39
1135	VIT_212s0059g01100	1227.72	3.53895	0.173837	20.3579	3.95e-92	4.36e-90
1136	VIT_218s0001g09380	470.813	3.53498	0.251502	14.0554	7.13e-45	2.2e-43
1137	VIT_201s0146g00440	151.277	3.53414	0.350918	10.0711	7.41e-24	1.09e-22
1138	VIT_203s0017g01410	48.6745	3.53371	0.496591	7.11594	1.11e-12	9.04e-12
1139	VIT_205s0077g00810	10336.1	3.53221	0.154409	22.8757	8.11e-116	1.5e-113
1140	VIT_209s0002g01150	7949.5	3.52979	0.143221	24.6457	4.09e-134	1.13e-131
1141	VIT_204s0008g05970	202.977	3.52853	0.351596	10.0358	1.06e-23	1.56e-22
1142	VIT_207s0031g01130	897.493	3.52474	0.3269	10.7823	4.17e-27	6.91e-26
1143	VIT_207s0005g04395	107.437	3.52462	0.411365	8.5681	1.05e-17	1.17e-16
1144	VIT_214s0108g01660	29.4542	3.52354	0.879905	4.00445	6.22e-05	0.000230335
1145	VIT_206s0004g05240	62.8747	3.51446	0.526206	6.67887	2.41e-11	1.78e-10
1146	VIT_209s0070g00300	16.1451	3.51172	0.787475	4.45946	8.22e-06	3.44e-05
1147	VIT_218s0001g14410	3042.79	3.51145	0.218966	16.0365	7.1e-58	3.23e-56
1148	VIT_200s1881g00010	15.4279	3.5114	0.919766	3.81771	0.000134694	0.00047372
1149	VIT_218s0001g07250	68.8299	3.51062	0.381473	9.2028	3.49e-20	4.46e-19
1150	VIT_200s0587g00030	1545.6	3.50974	0.221125	15.8722	9.87e-57	4.36e-55
1151	VIT_203s0091g00370	51.9285	3.50878	0.523297	6.70515	2.01e-11	1.49e-10
1152	VIT_212s0028g03560	42.5548	3.50825	0.598552	5.86123	4.59e-09	2.8e-08
1153	VIT_211s0016g00650	2172.07	3.50367	0.212447	16.492	4.19e-61	2.07e-59
1154	VIT_217s0000g01825	47.6097	3.50083	0.831813	4.20867	2.57e-05	0.000100871
1155	VIT_207s0005g02130	4346.26	3.49314	0.193964	18.0092	1.65e-72	1.1e-70
1156	VIT_213s0019g00440	7.00087	3.49259	1.49868	2.33044	0.0197827	0.0437924
1157	VIT_214s0068g02040	3240.38	3.49128	0.160341	21.7741	4.08e-105	5.92e-103
1158	VIT_218s0001g07320	32216.3	3.48798	0.159244	21.9034	2.41e-106	3.62e-104
1159	VIT_200s2634g00010	12.7347	3.48539	1.50898	2.30977	0.0209011	0.0459862
1160	VIT_213s0084g00670	720.508	3.48498	0.332806	10.4715	1.17e-25	1.85e-24
1161	VIT_213s0158g00090	77.9213	3.48443	0.486569	7.16122	8e-13	6.59e-12
1162	VIT_200s2563g00010	904.69	3.4831	0.29426	11.8368	2.52e-32	4.99e-31
1163	VIT_209s0018g01800	389.973	3.48309	1.28723	2.70589	0.00681222	0.0170198
1164	VIT_208s0007g02330	375.415	3.48286	0.289349	12.0369	2.27e-33	4.69e-32
1165	VIT_200s0229g00210	7.55942	3.48171	1.28769	2.70384	0.00685426	0.0171141
1166	VIT_201s0011g04660	29.561	3.47979	0.711654	4.88972	1.01e-06	4.79e-06
1167	VIT_201s0011g00890	17.8426	3.47873	0.991912	3.5071	0.000453019	0.00144619
1168	VIT_219s0090g01280	119.081	3.4784	0.523434	6.64534	3.03e-11	2.22e-10
1169	VIT_213s0019g00930	21.2618	3.47825	0.956471	3.63655	0.000276317	0.000920902
1170	VIT_202s0025g01720	27742.1	3.47777	0.163157	21.3154	8.16e-101	1.05e-98
1171	VIT_206s0009g03470	20.3778	3.47435	0.875918	3.96652	7.29e-05	0.000267484
1172	VIT_205s0102g01130	1690.67	3.47362	0.209591	16.5733	1.09e-61	5.44e-60
1173	VIT_213s0147g00120	606.876	3.47289	0.290789	11.943	7.06e-33	1.43e-31
1174	VIT_211s0016g02340	348.535	3.46815	0.411759	8.42276	3.68e-17	3.98e-16
1175	VIT_206s0004g08430	12.5219	3.46648	1.03612	3.34563	0.000820948	0.00248905
1176	VIT_201s0011g05970	526.039	3.4661	0.217213	15.9571	2.54e-57	1.14e-55
1177	VIT_202s0033g01050	4253.27	3.46465	0.160846	21.5402	6.55e-103	8.78e-101
1178	VIT_216s0039g01910	184.049	3.46122	0.511954	6.76081	1.37e-11	1.03e-10
1179	VIT_217s0000g06710	598.817	3.45993	0.238059	14.5339	7.39e-48	2.49e-46
1180	VIT_213s0158g00170	139.144	3.45976	0.296733	11.6595	2.05e-31	3.93e-30
1181	VIT_213s0019g01130	314.651	3.45514	0.384284	8.99112	2.45e-19	3.01e-18
1182	VIT_212s0057g00010	5206.16	3.45415	0.164244	21.0305	3.45e-98	4.25e-96
1183	VIT_219s0014g00260	14.27	3.44977	1.03956	3.31849	0.00090507	0.00272001
1184	VIT_208s0007g00970	523.01	3.44905	0.246263	14.0056	1.44e-44	4.36e-43
1185	VIT_209s0002g05590	1159.54	3.44733	0.24048	14.3352	1.32e-46	4.28e-45
1186	VIT_202s0025g03600	1458.39	3.44096	0.151411	22.726	2.48e-114	4.28e-112
1187	VIT_203s0038g03800	3049.52	3.43747	0.194619	17.6626	8.14e-70	5.18e-68
1188	VIT_218s0122g01310	63.5871	3.43688	0.770609	4.45996	8.2e-06	3.44e-05
1189	VIT_218s0001g13250	4414.38	3.43611	0.177655	19.3415	2.4e-83	2.18e-81
1190	VIT_201s0010g00800	19.2271	3.43485	0.893732	3.84326	0.000121409	0.000430198
1191	VIT_217s0000g05740	15.0845	3.43372	0.997932	3.44084	0.000579915	0.00181452
1192	VIT_215s0046g00470	550.516	3.43035	0.238449	14.3861	6.33e-47	2.09e-45
1193	VIT_219s0014g03790	11.7903	3.42801	1.16777	2.93553	0.00332977	0.00890901
1194	VIT_204s0008g00480	148.757	3.42797	0.282408	12.1384	6.61e-34	1.39e-32
1195	VIT_209s0002g05360	236.61	3.42772	0.263063	13.03	8.26e-39	2.05e-37
1196	VIT_213s0019g00330	119.29	3.42529	0.519358	6.59523	4.25e-11	3.06e-10
1197	VIT_203s0091g01040	102.164	3.4222	0.434787	7.87098	3.52e-15	3.39e-14
1198	VIT_212s0034g01970	9.31893	3.42074	1.45171	2.35635	0.0184554	0.0411525
1199	VIT_203s0063g01830	10.0275	3.42066	1.2508	2.73478	0.00624227	0.0157385
1200	VIT_212s0057g01230	29.7094	3.41944	0.639728	5.34515	9.03e-08	4.81e-07
1201	VIT_214s0036g00420	257.005	3.41832	0.41106	8.31587	9.11e-17	9.68e-16
1202	VIT_219s0177g00070	41775.5	3.4179	0.13173	25.9462	2e-148	7.96e-146
1203	VIT_211s0016g05480	1578.38	3.41768	0.189924	17.995	2.13e-72	1.42e-70
1204	VIT_213s0064g01510	802.218	3.41308	0.303996	11.2274	2.99e-29	5.38e-28
1205	VIT_210s0003g01990	31.7103	3.41059	0.770227	4.42803	9.51e-06	3.95e-05
1206	VIT_215s0046g01390	110.371	3.40987	0.506539	6.73171	1.68e-11	1.25e-10
1207	VIT_200s0823g00010	9.23758	3.40878	1.27737	2.6686	0.00761685	0.01881
1208	VIT_210s0092g00150	20.6641	3.40813	0.859422	3.96561	7.32e-05	0.000268467
1209	VIT_210s0003g00330	15.3619	3.40752	0.911692	3.73757	0.000185806	0.000638548
1210	VIT_216s0050g01690	3103.75	3.40567	0.240079	14.1856	1.12e-45	3.53e-44
1211	VIT_202s0025g00290	106.933	3.40395	0.440764	7.72284	1.14e-14	1.06e-13
1212	VIT_203s0132g00380	47.3797	3.40387	0.576144	5.90801	3.46e-09	2.14e-08
1213	VIT_201s0010g03600	8342.63	3.40379	0.185806	18.3191	5.83e-75	4.1e-73
1214	VIT_211s0103g00210	32.0084	3.40117	0.648576	5.24405	1.57e-07	8.18e-07
1215	VIT_202s0012g00540	204.641	3.40074	0.292492	11.6268	3.01e-31	5.74e-30
1216	VIT_211s0016g00960	80.8566	3.39984	0.485558	7.00193	2.52e-12	2e-11
1217	VIT_214s0006g02910	1986.57	3.39784	0.178175	19.0702	4.47e-81	3.77e-79
1218	VIT_210s0042g01180	81.0982	3.39732	0.333015	10.2017	1.95e-24	2.93e-23
1219	VIT_210s0071g00150	404.087	3.39729	0.303528	11.1926	4.43e-29	7.9e-28
1220	VIT_204s0008g02660	17.9833	3.39678	1.00604	3.37638	0.000734451	0.00225191
1221	VIT_201s0127g00160	593.266	3.39598	0.231472	14.6713	9.85e-49	3.39e-47
1222	VIT_201s0010g02450	10.7888	3.3949	1.3645	2.48801	0.012846	0.0298403
1223	VIT_210s0116g00840	16.7993	3.38082	0.967899	3.49294	0.000477725	0.00151847
1224	VIT_218s0001g04160	7198.22	3.37952	0.141094	23.9523	8.75e-127	2.17e-124
1225	VIT_209s0002g04930	35.5688	3.37858	0.698597	4.83623	1.32e-06	6.17e-06
1226	VIT_210s0116g01790	12.5113	3.37584	1.28477	2.62758	0.00859953	0.02095
1227	VIT_215s0048g01080	42.71	3.37497	0.690803	4.88558	1.03e-06	4.88e-06
1228	VIT_205s0102g00450	51.3135	3.3747	0.546211	6.17839	6.48e-10	4.28e-09
1229	VIT_208s0007g06460	30.2556	3.37439	0.85917	3.9275	8.58e-05	0.000311478
1230	VIT_208s0056g01600	38.9767	3.37236	0.623706	5.40696	6.41e-08	3.46e-07
1231	VIT_211s0206g00070	659.947	3.37116	0.252173	13.3685	9.24e-41	2.43e-39
1232	VIT_213s0064g01165	25.7357	3.36996	0.792912	4.25011	2.14e-05	8.5e-05
1233	VIT_206s0080g00780	1504.29	3.36676	0.29119	11.5621	6.41e-31	1.21e-29
1234	VIT_213s0067g00930	1417.77	3.36143	0.239359	14.0435	8.45e-45	2.59e-43
1235	VIT_217s0000g03010	27.5327	3.36097	0.601825	5.58463	2.34e-08	1.32e-07
1236	VIT_206s0004g04110	144.974	3.35724	0.379421	8.84833	8.88e-19	1.05e-17
1237	VIT_201s0010g01180	1415.72	3.35554	0.230165	14.5788	3.83e-48	1.3e-46
1238	VIT_217s0000g00150	5.53269	3.35525	1.28803	2.60495	0.00918872	0.022212
1239	VIT_218s0001g09290	52.1293	3.35414	0.528338	6.34847	2.17e-10	1.49e-09
1240	VIT_218s0122g00371	9.30052	3.35311	1.21317	2.76391	0.00571128	0.0145438
1241	VIT_207s0031g00720	786.838	3.35253	0.642283	5.21971	1.79e-07	9.28e-07
1242	VIT_207s0005g04410	43.8884	3.35217	0.579594	5.78366	7.31e-09	4.35e-08
1243	VIT_210s0003g00150	1525.79	3.34469	0.18018	18.563	6.4e-77	4.77e-75
1244	VIT_200s0194g00030	40925.9	3.34384	0.180271	18.5489	8.32e-77	6.16e-75
1245	VIT_210s0003g00580	658.663	3.34333	0.266691	12.5364	4.72e-36	1.07e-34
1246	VIT_213s0067g03130	48.2546	3.34328	0.729487	4.58306	4.58e-06	1.99e-05
1247	VIT_200s1455g00010	10.1181	3.34275	1.28271	2.60601	0.00916036	0.0221586
1248	VIT_208s0007g06800	17.0943	3.33818	1.0144	3.2908	0.000999022	0.0029731
1249	VIT_204s0023g00640	14.6834	3.33618	1.20118	2.77741	0.00547935	0.0139945
1250	VIT_208s0007g07490	21.2307	3.33309	0.686052	4.85836	1.18e-06	5.56e-06
1251	VIT_200s0218g00010	483.824	3.33146	0.373733	8.914	4.92e-19	5.95e-18
1252	VIT_208s0007g07690	17.962	3.326	1.09003	3.05129	0.00227861	0.00631261
1253	VIT_208s0007g08310	1971.15	3.32576	0.442074	7.52309	5.35e-14	4.79e-13
1254	VIT_200s0253g00140	61.8869	3.32514	0.65573	5.07091	3.96e-07	1.96e-06
1255	VIT_217s0053g00980	48.5045	3.32194	0.497154	6.6819	2.36e-11	1.74e-10
1256	VIT_216s0050g00430	43.0343	3.32131	0.689993	4.81354	1.48e-06	6.87e-06
1257	VIT_219s0090g01530	465.304	3.31989	0.51383	6.46106	1.04e-10	7.27e-10
1258	VIT_218s0001g03810	929.082	3.31917	0.214601	15.4667	5.82e-54	2.38e-52
1259	VIT_206s0004g03470	11.5705	3.31909	1.07127	3.09829	0.00194644	0.00547341
1260	VIT_211s0037g00810	1544.74	3.31758	0.177053	18.7378	2.44e-78	1.9e-76
1261	VIT_205s0049g01420	71.8981	3.31479	0.490204	6.76206	1.36e-11	1.02e-10
1262	VIT_205s0049g00510	15.55	3.30439	1.14236	2.89258	0.00382089	0.0100871
1263	VIT_204s0008g06920	2281.24	3.30037	0.165398	19.9541	1.38e-88	1.42e-86
1264	VIT_210s0003g02190	6.80403	3.29889	1.45055	2.27423	0.0229523	0.04988
1265	VIT_201s0010g02940	88.7825	3.2981	0.676891	4.87242	1.1e-06	5.19e-06
1266	VIT_203s0063g00880	800.279	3.29748	0.441523	7.46842	8.12e-14	7.18e-13
1267	VIT_210s0116g00560	6.38366	3.28854	1.35617	2.42487	0.015314	0.0348565
1268	VIT_219s0014g00290	3491.4	3.28761	0.148207	22.1826	5.06e-109	7.91e-107
1269	VIT_217s0000g06000	23.9004	3.28074	0.844814	3.88338	0.000103013	0.000369433
1270	VIT_213s0047g00090	10.2156	3.2785	1.33774	2.45078	0.0142548	0.0326702
1271	VIT_211s0016g02850	2211.71	3.2755	0.136159	24.0564	7.15e-128	1.82e-125
1272	VIT_209s0002g00990	876.126	3.27352	0.197705	16.5576	1.41e-61	7.04e-60
1273	VIT_204s0008g00690	562.915	3.2696	0.194398	16.8191	1.77e-63	9.54e-62
1274	VIT_201s0010g02930	70.8196	3.26515	0.690164	4.73098	2.23e-06	1.01e-05
1275	VIT_202s0033g00800	108.542	3.26505	0.407062	8.02103	1.05e-15	1.04e-14
1276	VIT_204s0069g01010	368.282	3.26367	0.406333	8.03203	9.59e-16	9.58e-15
1277	VIT_212s0028g02650	21.7907	3.26126	0.871777	3.74093	0.000183341	0.000630512
1278	VIT_200s2527g00010	15.9439	3.26098	1.19017	2.73994	0.0061451	0.0155211
1279	VIT_206s0004g07450	9.34418	3.26047	1.09886	2.96714	0.00300589	0.00812055
1280	VIT_218s0001g05250	5113.84	3.25733	0.159554	20.4152	1.22e-92	1.37e-90
1281	VIT_213s0156g00630	14.739	3.2542	0.792692	4.10525	4.04e-05	0.000153758
1282	VIT_217s0000g08150	522.514	3.2542	0.218697	14.8799	4.45e-50	1.59e-48
1283	VIT_202s0012g01320	9327.17	3.24767	0.217174	14.9542	1.46e-50	5.27e-49
1284	VIT_208s0007g01510	983.978	3.24546	0.27788	11.6794	1.63e-31	3.13e-30
1285	VIT_201s0010g03750	19.0951	3.24537	0.942064	3.44496	0.000571143	0.00178905
1286	VIT_208s0007g05560	16.9726	3.24388	0.811368	3.99804	6.39e-05	0.000236133
1287	VIT_211s0149g00330	7.52489	3.24384	1.28016	2.53393	0.0112791	0.0265871
1288	VIT_202s0033g00870	80.952	3.24258	0.45405	7.14145	9.24e-13	7.57e-12
1289	VIT_204s0023g03170	523.147	3.24209	0.249897	12.9737	1.72e-38	4.24e-37
1290	VIT_216s0098g00710	92.1563	3.2394	0.405128	7.99598	1.29e-15	1.27e-14
1291	VIT_212s0035g01180	705.395	3.23768	0.225394	14.3645	8.64e-47	2.83e-45
1292	VIT_208s0007g08350	113.068	3.23666	0.37714	8.58212	9.31e-18	1.04e-16
1293	VIT_205s0102g00130	725.841	3.2332	0.220298	14.6765	9.12e-49	3.15e-47
1294	VIT_211s0016g02830	2247.06	3.23027	0.180641	17.8823	1.62e-71	1.06e-69
1295	VIT_208s0007g08590	498.324	3.22929	0.274938	11.7455	7.45e-32	1.45e-30
1296	VIT_200s0945g00010	10.4094	3.22315	0.872969	3.69217	0.000222349	0.000753051
1297	VIT_207s0005g01450	663.532	3.22104	0.242034	13.3082	2.07e-40	5.39e-39
1298	VIT_209s0002g05840	113.143	3.22031	0.378428	8.5097	1.74e-17	1.93e-16
1299	VIT_216s0050g01920	6.16862	3.2203	1.26656	2.54256	0.0110045	0.0260077
1300	VIT_202s0012g00410	44.3607	3.22009	0.51254	6.28262	3.33e-10	2.24e-09
1301	VIT_209s0002g08540	124.979	3.21963	0.396518	8.11976	4.67e-16	4.75e-15
1302	VIT_214s0066g02110	12.9082	3.21813	1.13695	2.83051	0.00464743	0.0120543
1303	VIT_208s0007g08580	134.397	3.21504	0.39824	8.07313	6.85e-16	6.91e-15
1304	VIT_211s0016g02980	12.5232	3.21367	1.05051	3.05916	0.0022196	0.0061647
1305	VIT_212s0035g01120	15.1288	3.21203	0.934976	3.43541	0.000591654	0.00184688
1306	VIT_200s0620g00010	2469.63	3.21156	0.214365	14.9818	9.66e-51	3.52e-49
1307	VIT_218s0001g09850	1754.25	3.20751	0.223134	14.3749	7.44e-47	2.45e-45
1308	VIT_201s0011g05580	1710.96	3.20658	0.262894	12.1972	3.22e-34	6.88e-33
1309	VIT_214s0068g01520	22.5864	3.20554	0.893188	3.58887	0.000332116	0.00108985
1310	VIT_204s0044g01290	3420.18	3.20547	0.121856	26.3055	1.66e-152	7.17e-150
1311	VIT_218s0001g00700	41.4964	3.20492	0.557569	5.74802	9.03e-09	5.32e-08
1312	VIT_214s0128g00780	1495.77	3.20406	0.266325	12.0306	2.45e-33	5.05e-32
1313	VIT_208s0007g08300	8014.05	3.20374	0.191032	16.7707	4e-63	2.11e-61
1314	VIT_218s0001g06240	2323.25	3.20319	0.236436	13.5478	8.16e-42	2.24e-40
1315	VIT_215s0048g01230	432.611	3.20292	0.165026	19.4086	6.53e-84	6e-82
1316	VIT_204s0044g01420	429.577	3.20277	0.274582	11.6642	1.94e-31	3.72e-30
1317	VIT_204s0008g01130	39.7274	3.20192	0.536584	5.96724	2.41e-09	1.51e-08
1318	VIT_208s0040g00680	38.4321	3.20175	0.676274	4.7344	2.2e-06	9.93e-06
1319	VIT_202s0025g01430	3149.16	3.19621	0.212872	15.0147	5.88e-51	2.16e-49
1320	VIT_211s0037g00300	5671.16	3.1956	0.111252	28.7238	1.92e-181	1.32e-178
1321	VIT_209s0002g01890	16.2298	3.19336	1.02231	3.12366	0.00178618	0.0050622
1322	VIT_206s0004g03630	14.5366	3.19082	0.907969	3.51423	0.000441027	0.00141132
1323	VIT_209s0002g05080	104.73	3.18964	0.500851	6.36845	1.91e-10	1.31e-09
1324	VIT_214s0066g01320	3381.99	3.18658	0.186834	17.0557	3.17e-65	1.78e-63
1325	VIT_200s0179g00350	137.453	3.18577	0.422583	7.53881	4.74e-14	4.27e-13
1326	VIT_208s0007g07820	16.669	3.18505	0.761382	4.18325	2.87e-05	0.000112049
1327	VIT_201s0150g00330	9172.66	3.18195	0.214129	14.86	6e-50	2.13e-48
1328	VIT_204s0008g02450	46.9402	3.18188	0.454886	6.9949	2.65e-12	2.1e-11
1329	VIT_213s0064g01260	9.51272	3.18019	1.29881	2.44853	0.0143439	0.0328631
1330	VIT_201s0010g03640	1349.02	3.17546	0.241912	13.1265	2.32e-39	5.87e-38
1331	VIT_208s0040g02430	20.1085	3.17509	0.796697	3.98532	6.74e-05	0.000248412
1332	VIT_208s0056g00870	20.558	3.17394	0.930438	3.41124	0.00064669	0.00200325
1333	VIT_216s0100g00880	30.0596	3.17254	0.761163	4.16801	3.07e-05	0.000119265
1334	VIT_206s0004g03010	28.5344	3.1684	0.858471	3.69074	0.0002236	0.00075677
1335	VIT_200s1274g00010	737.334	3.16771	0.184226	17.1947	2.91e-66	1.68e-64
1336	VIT_218s0157g00190	1055.11	3.16376	0.174924	18.0865	4.07e-73	2.75e-71
1337	VIT_201s0026g02540	1570.83	3.16333	0.26461	11.9547	6.13e-33	1.24e-31
1338	VIT_206s0061g00040	315.884	3.16179	0.288897	10.9443	7.07e-28	1.21e-26
1339	VIT_218s0001g00320	25.4629	3.15748	0.993727	3.17742	0.00148594	0.00428036
1340	VIT_202s0025g02805	2166.59	3.15567	0.217394	14.516	9.6e-48	3.23e-46
1341	VIT_207s0031g01930	36.313	3.15389	0.494572	6.37701	1.81e-10	1.24e-09
1342	VIT_200s0415g00030	2894.37	3.15192	0.142028	22.1923	4.08e-109	6.43e-107
1343	VIT_206s0004g08440	822.132	3.14855	0.234084	13.4505	3.06e-41	8.27e-40
1344	VIT_216s0050g01250	1274.2	3.14698	0.202233	15.5611	1.34e-54	5.6e-53
1345	VIT_203s0063g00770	54.301	3.14668	0.684796	4.59507	4.33e-06	1.88e-05
1346	VIT_218s0041g02080	3436.66	3.14574	0.174441	18.0332	1.07e-72	7.17e-71
1347	VIT_216s0100g01010	183.951	3.14457	0.857398	3.66758	0.000244858	0.000823104
1348	VIT_205s0051g00340	2253.84	3.14378	0.185973	16.9045	4.17e-64	2.3e-62
1349	VIT_204s0008g07170	21.8538	3.14207	1.1032	2.84815	0.00439741	0.0114507
1350	VIT_203s0091g00690	6366.6	3.14203	0.172071	18.2601	1.72e-74	1.19e-72
1351	VIT_210s0042g00600	17.5454	3.14196	1.04225	3.0146	0.00257322	0.00704627
1352	VIT_216s0098g01150	57.6727	3.14101	0.473887	6.62819	3.4e-11	2.47e-10
1353	VIT_202s0012g00830	31.1027	3.13848	0.900003	3.48718	0.000488134	0.00154784
1354	VIT_209s0002g07890	202.909	3.13663	0.31891	9.83546	7.92e-23	1.12e-21
1355	VIT_209s0070g00380	574.849	3.13563	0.23445	13.3744	8.53e-41	2.25e-39
1356	VIT_212s0134g00240	3440.32	3.13516	0.21012	14.9208	2.42e-50	8.65e-49
1357	VIT_213s0019g03040	918.366	3.13026	0.264812	11.8207	3.05e-32	6.03e-31
1358	VIT_206s0061g01300	2529.22	3.12638	0.211011	14.8162	1.15e-49	4.07e-48
1359	VIT_206s0004g07630	45.6155	3.1204	0.432991	7.20662	5.74e-13	4.75e-12
1360	VIT_208s0058g00680	177.047	3.11699	0.269543	11.564	6.27e-31	1.18e-29
1361	VIT_213s0019g02040	1884.8	3.11536	0.142844	21.8095	1.89e-105	2.77e-103
1362	VIT_203s0063g00150	249.35	3.11448	0.287938	10.8165	2.88e-27	4.8e-26
1363	VIT_207s0005g00580	75.121	3.11423	0.512265	6.07934	1.21e-09	7.77e-09
1364	VIT_216s0098g01000	71.6274	3.1141	0.47048	6.61899	3.62e-11	2.62e-10
1365	VIT_204s0008g05870	960.65	3.11303	0.229261	13.5785	5.37e-42	1.48e-40
1366	VIT_201s0010g03930	541.623	3.11182	0.34512	9.01663	1.94e-19	2.39e-18
1367	VIT_218s0001g06150	2656.45	3.10845	0.377191	8.24107	1.71e-16	1.79e-15
1368	VIT_218s0001g00440	331.393	3.1069	0.219591	14.1486	1.9e-45	5.94e-44
1369	VIT_200s0216g00060	21.8332	3.10612	1.00651	3.08603	0.00202845	0.00567429
1370	VIT_213s0019g01180	109.9	3.1023	0.472231	6.56945	5.05e-11	3.62e-10
1371	VIT_206s0061g00270	11616	3.09638	0.156114	19.8341	1.51e-87	1.52e-85
1372	VIT_218s0001g14700	3886.42	3.09534	0.153619	20.1495	2.72e-90	2.89e-88
1373	VIT_214s0066g02090	142.853	3.09325	0.385594	8.02205	1.04e-15	1.04e-14
1374	VIT_203s0063g02090	19.4546	3.0812	0.840749	3.66483	0.000247505	0.000831157
1375	VIT_201s0011g04810	515.888	3.07979	0.25305	12.1707	4.45e-34	9.47e-33
1376	VIT_212s0134g00450	4428.78	3.07969	0.187373	16.4361	1.05e-60	5.17e-59
1377	VIT_213s0147g00150	566.707	3.07963	0.272577	11.2982	1.34e-29	2.43e-28
1378	VIT_215s0046g00320	2498.53	3.07619	0.200645	15.3315	4.71e-53	1.87e-51
1379	VIT_217s0000g05530	1719.23	3.07575	0.174162	17.6602	8.49e-70	5.38e-68
1380	VIT_217s0000g06590	1772.07	3.0746	0.163266	18.8318	4.14e-79	3.28e-77
1381	VIT_214s0068g01500	471.624	3.07227	0.384369	7.99301	1.32e-15	1.3e-14
1382	VIT_211s0016g02580	3021.12	3.07151	0.180304	17.0352	4.5e-65	2.52e-63
1383	VIT_218s0122g00500	2652.04	3.06732	0.164483	18.6483	1.3e-77	1e-75
1384	VIT_214s0068g02150	188.062	3.06684	0.413422	7.41818	1.19e-13	1.04e-12
1385	VIT_209s0070g00490	1042.4	3.06426	0.200492	15.2837	9.82e-53	3.84e-51
1386	VIT_219s0014g01640	730.648	3.0635	0.219725	13.9424	3.5e-44	1.04e-42
1387	VIT_217s0000g08370	168.951	3.05607	0.360491	8.47754	2.3e-17	2.53e-16
1388	VIT_212s0028g03190	7.76156	3.05046	0.96159	3.17231	0.00151232	0.00434939
1389	VIT_202s0025g00820	5.28955	3.05021	1.23623	2.46734	0.013612	0.031371
1390	VIT_213s0019g01980	3940.41	3.05004	0.147812	20.6346	1.34e-94	1.58e-92
1391	VIT_201s0011g03370	2425.27	3.04287	0.171486	17.7441	1.91e-70	1.23e-68
1392	VIT_214s0066g01850	9.88931	3.04254	1.11573	2.72695	0.00639229	0.0160759
1393	VIT_206s0004g04480	826.536	3.04228	0.164202	18.5276	1.24e-76	9.08e-75
1394	VIT_209s0002g05870	1368.49	3.04183	0.182066	16.7073	1.16e-62	6.03e-61
1395	VIT_211s0037g00860	348.68	3.04139	0.234484	12.9706	1.8e-38	4.4e-37
1396	VIT_200s0373g00010	30.7344	3.04081	0.918606	3.31024	0.000932154	0.00279042
1397	VIT_214s0068g02120	12.4127	3.04011	1.13905	2.66899	0.00760796	0.0187927
1398	VIT_214s0060g00810	939.044	3.0339	0.320045	9.47962	2.55e-21	3.41e-20
1399	VIT_205s0077g01860	12.1568	3.03296	1.17684	2.57721	0.00996021	0.0238464
1400	VIT_218s0001g08230	1612.56	3.02695	0.373178	8.11128	5.01e-16	5.08e-15
1401	VIT_213s0019g01310	82.2586	3.02643	0.470777	6.42859	1.29e-10	8.97e-10
1402	VIT_214s0171g00320	44.2272	3.02575	0.566605	5.34013	9.29e-08	4.93e-07
1403	VIT_208s0007g04570	319.384	3.02417	0.305746	9.89109	4.55e-23	6.53e-22
1404	VIT_201s0011g03110	882.681	3.01967	0.292012	10.3409	4.6e-25	7.11e-24
1405	VIT_204s0044g02010	36.8153	3.01776	0.511596	5.89872	3.66e-09	2.26e-08
1406	VIT_205s0077g00650	654.973	3.01448	0.163002	18.4935	2.33e-76	1.69e-74
1407	VIT_212s0059g00870	15.3794	3.00853	1.0864	2.76927	0.0056182	0.0143233
1408	VIT_201s0150g00410	52.8993	3.00822	0.735294	4.09118	4.29e-05	0.000162924
1409	VIT_208s0040g00870	14053.6	3.00559	0.156011	19.2652	1.05e-82	9.32e-81
1410	VIT_211s0016g05550	79.5446	3.00341	0.637855	4.70861	2.49e-06	1.12e-05
1411	VIT_219s0014g05430	1750.51	3.0023	0.224299	13.3853	7.37e-41	1.96e-39
1412	VIT_210s0116g01040	30.8215	3.00205	1.24767	2.40613	0.0161225	0.0364833
1413	VIT_200s1206g00015	10.0815	3.00177	1.19994	2.50161	0.012363	0.0288373
1414	VIT_210s0003g00140	611.221	2.99821	0.228247	13.1358	2.05e-39	5.21e-38
1415	VIT_211s0016g04700	6780.7	2.99177	0.169119	17.6904	4.97e-70	3.17e-68
1416	VIT_204s0044g01120	9.24372	2.99151	0.895354	3.34115	0.000834333	0.00252578
1417	VIT_217s0000g00330	12.0663	2.99005	1.04427	2.86328	0.00419276	0.0109768
1418	VIT_206s0061g01120	1985.34	2.98951	0.163233	18.3144	6.35e-75	4.45e-73
1419	VIT_204s0008g01150	8.50204	2.98913	1.15339	2.59159	0.00955329	0.0229858
1420	VIT_209s0054g00105	61.9585	2.98866	0.655629	4.55846	5.15e-06	2.22e-05
1421	VIT_200s2508g00010	45.7456	2.98384	0.73115	4.08102	4.48e-05	0.000169663
1422	VIT_217s0000g07680	13.5357	2.98348	1.03928	2.87071	0.00409545	0.0107516
1423	VIT_207s0005g02070	116.22	2.9821	0.54559	5.46582	4.61e-08	2.52e-07
1424	VIT_201s0011g05570	1358.86	2.97942	0.213278	13.9697	2.39e-44	7.15e-43
1425	VIT_215s0021g02790	719.772	2.97512	0.199611	14.9046	3.08e-50	1.1e-48
1426	VIT_206s0080g00170	30.3732	2.97378	0.8112	3.6659	0.000246471	0.000827966
1427	VIT_208s0007g01930	139.609	2.972	0.693863	4.28327	1.84e-05	7.38e-05
1428	VIT_208s0007g08500	13.0586	2.96736	0.869098	3.41429	0.000639474	0.00198275
1429	VIT_200s0317g00050	2914.5	2.96639	0.194053	15.2865	9.4e-53	3.68e-51
1430	VIT_203s0017g01940	2183.44	2.96574	0.17615	16.8364	1.32e-63	7.14e-62
1431	VIT_204s0008g05030	925.043	2.96344	0.143764	20.6132	2.09e-94	2.41e-92
1432	VIT_209s0002g04560	334.512	2.9611	0.36177	8.18505	2.72e-16	2.82e-15
1433	VIT_203s0091g00670	7.02079	2.96026	1.25163	2.36513	0.0180237	0.0402669
1434	VIT_216s0098g00370	1115.87	2.95767	0.189991	15.5674	1.21e-54	5.08e-53
1435	VIT_216s0050g02190	2019.26	2.95656	0.125825	23.4974	4.34e-122	9.36e-120
1436	VIT_218s0001g10230	45.3163	2.95348	0.517	5.71272	1.11e-08	6.5e-08
1437	VIT_214s0068g00890	557.441	2.95205	0.235429	12.539	4.56e-36	1.04e-34
1438	VIT_219s0027g00750	22.4015	2.95157	0.763745	3.8646	0.000111273	0.00039662
1439	VIT_200s0160g00130	21.8127	2.94802	1.06089	2.77882	0.00545575	0.0139414
1440	VIT_217s0000g06860	4768.3	2.94773	0.165022	17.8627	2.3e-71	1.5e-69
1441	VIT_210s0597g00020	204.505	2.94662	0.249579	11.8063	3.62e-32	7.13e-31
1442	VIT_213s0067g00700	733.565	2.94045	0.214369	13.7168	8.06e-43	2.28e-41
1443	VIT_209s0018g01900	31.8173	2.93861	0.602059	4.88093	1.06e-06	4.98e-06
1444	VIT_201s0137g00460	1370.52	2.93779	0.194418	15.1107	1.38e-51	5.16e-50
1445	VIT_218s0001g09230	6741.94	2.93772	0.207403	14.1643	1.52e-45	4.77e-44
1446	VIT_208s0007g06560	319.038	2.93356	0.324585	9.03788	1.6e-19	1.99e-18
1447	VIT_214s0006g00450	111.458	2.93327	0.460425	6.3708	1.88e-10	1.29e-09
1448	VIT_214s0108g00110	18.1129	2.933	0.995695	2.94568	0.00322241	0.00864741
1449	VIT_205s0077g01500	1210.3	2.93088	0.209214	14.009	1.37e-44	4.16e-43
1450	VIT_200s0429g00010	41.6778	2.93041	0.569268	5.14768	2.64e-07	1.34e-06
1451	VIT_213s0064g00560	12.5737	2.92951	1.12367	2.60709	0.00913159	0.0220997
1452	VIT_217s0000g04380	22.9594	2.92738	1.0586	2.76533	0.00568645	0.0144843
1453	VIT_211s0052g00450	1694.28	2.92586	0.205673	14.2258	6.34e-46	2e-44
1454	VIT_207s0197g00230	38.0958	2.92501	0.652343	4.48386	7.33e-06	3.09e-05
1455	VIT_206s0004g04510	40401.8	2.92444	0.15257	19.1679	6.86e-82	6e-80
1456	VIT_211s0016g02970	9.77094	2.92336	1.05798	2.76315	0.00572467	0.0145704
1457	VIT_214s0066g01810	1708.24	2.92011	0.255013	11.4508	2.33e-30	4.33e-29
1458	VIT_210s0003g05450	3795.67	2.91914	0.239769	12.1748	4.24e-34	9.03e-33
1459	VIT_201s0010g03880	126.301	2.91896	0.356835	8.18015	2.83e-16	2.94e-15
1460	VIT_210s0071g00190	656.55	2.91865	0.244808	11.9222	9.07e-33	1.82e-31
1461	VIT_217s0000g00400	3151.53	2.91755	0.127917	22.8082	3.8e-115	6.86e-113
1462	VIT_203s0063g00280	261.596	2.91511	0.229182	12.7196	4.6e-37	1.08e-35
1463	VIT_205s0077g01690	70.6476	2.9138	0.570749	5.10523	3.3e-07	1.66e-06
1464	VIT_218s0001g00360	2286.91	2.91276	0.203137	14.3389	1.25e-46	4.06e-45
1465	VIT_203s0038g02280	1866.43	2.91209	0.183462	15.873	9.75e-57	4.32e-55
1466	VIT_215s0046g03180	869.294	2.9068	0.235565	12.3397	5.54e-35	1.21e-33
1467	VIT_204s0008g00700	18.4881	2.90178	1.05087	2.76132	0.00575682	0.014641
1468	VIT_201s0137g00780	67.5233	2.90043	0.570669	5.08251	3.72e-07	1.85e-06
1469	VIT_219s0014g02240	4309.81	2.89587	0.160238	18.0723	5.27e-73	3.55e-71
1470	VIT_214s0083g00080	17.0405	2.89333	0.914282	3.1646	0.00155299	0.00445989
1471	VIT_218s0001g02570	379.73	2.89299	0.286368	10.1023	5.39e-24	7.98e-23
1472	VIT_201s0011g04550	1942.08	2.89082	0.165904	17.4247	5.36e-68	3.25e-66
1473	VIT_201s0011g06210	3209.37	2.88571	0.172904	16.6897	1.56e-62	8.05e-61
1474	VIT_206s0004g06660	129.471	2.88493	0.457911	6.3002	2.97e-10	2.01e-09
1475	VIT_211s0206g00080	207.999	2.8846	0.435095	6.62982	3.36e-11	2.45e-10
1476	VIT_200s0291g00070	129.669	2.88357	0.392403	7.3485	2e-13	1.72e-12
1477	VIT_201s0026g01950	74.28	2.88206	0.469351	6.14052	8.22e-10	5.37e-09
1478	VIT_219s0090g00420	2090.51	2.87845	0.215972	13.3279	1.59e-40	4.17e-39
1479	VIT_216s0050g02510	788.618	2.87789	0.328143	8.77025	1.78e-18	2.08e-17
1480	VIT_213s0019g04390	1490.53	2.87698	0.304253	9.45588	3.2e-21	4.27e-20
1481	VIT_208s0007g06550	305.125	2.87314	0.222029	12.9404	2.66e-38	6.49e-37
1482	VIT_211s0206g00030	131.574	2.872	0.785858	3.65461	0.000257574	0.000862927
1483	VIT_207s0005g00030	5853.06	2.87108	0.187775	15.29	8.92e-53	3.5e-51
1484	VIT_208s0040g00010	565.21	2.87079	0.247705	11.5895	4.66e-31	8.81e-30
1485	VIT_214s0006g00180	1705.56	2.87071	0.176853	16.2322	2.99e-59	1.42e-57
1486	VIT_205s0094g00340	462.117	2.86883	0.591005	4.85415	1.21e-06	5.67e-06
1487	VIT_212s0028g03800	279.605	2.86785	0.29801	9.62333	6.37e-22	8.69e-21
1488	VIT_218s0001g00790	25.9579	2.86426	0.894204	3.20314	0.00135936	0.00394435
1489	VIT_212s0028g03310	1927.31	2.86327	0.138338	20.6976	3.64e-95	4.32e-93
1490	VIT_219s0138g00140	1937.96	2.86014	0.164076	17.4318	4.73e-68	2.87e-66
1491	VIT_212s0055g00090	13.1485	2.85946	1.03527	2.76204	0.00574422	0.0146127
1492	VIT_206s0009g00680	1090.9	2.8593	0.191152	14.9583	1.38e-50	4.97e-49
1493	VIT_214s0036g00990	4198.58	2.85723	0.112455	25.4077	2.08e-142	7.36e-140
1494	VIT_208s0040g00670	1671.22	2.85707	0.189579	15.0706	2.53e-51	9.37e-50
1495	VIT_208s0007g05000	227.576	2.85607	0.384116	7.43544	1.04e-13	9.15e-13
1496	VIT_217s0000g00010	4747.86	2.8518	0.16886	16.8885	5.47e-64	3.01e-62
1497	VIT_201s0011g03860	17.4911	2.8509	1.02224	2.78887	0.00528924	0.0135525
1498	VIT_204s0044g01300	66.9323	2.85034	0.62328	4.57313	4.8e-06	2.08e-05
1499	VIT_204s0023g00730	643.572	2.85018	0.211974	13.4459	3.26e-41	8.79e-40
1500	VIT_202s0033g00130	762.117	2.84703	0.207356	13.7301	6.7e-43	1.9e-41
1501	VIT_208s0007g01650	1853.48	2.84653	0.205001	13.8854	7.76e-44	2.29e-42
1502	VIT_217s0000g07740	28.6818	2.84635	0.713038	3.99186	6.56e-05	0.000242239
1503	VIT_209s0070g00160	10621.3	2.84544	0.189397	15.0237	5.14e-51	1.89e-49
1504	VIT_219s0014g02170	131.401	2.84418	0.318164	8.93935	3.91e-19	4.75e-18
1505	VIT_214s0068g01470	934.872	2.83794	0.153201	18.5244	1.31e-76	9.62e-75
1506	VIT_216s0013g00450	117.305	2.83443	0.463515	6.11507	9.65e-10	6.27e-09
1507	VIT_208s0032g00680	130.127	2.83372	0.344156	8.23383	1.81e-16	1.89e-15
1508	VIT_217s0000g03520	13.3462	2.83299	0.867936	3.26405	0.00109832	0.00324477
1509	VIT_206s0004g04990	24.4256	2.83154	0.781005	3.62551	0.000288393	0.000957611
1510	VIT_208s0056g00610	19.3779	2.83017	0.944917	2.99515	0.00274308	0.00747326
1511	VIT_212s0059g01300	1206.02	2.82817	0.170547	16.583	9.26e-62	4.66e-60
1512	VIT_213s0073g00186	22.7529	2.82813	0.696623	4.05977	4.91e-05	0.000184812
1513	VIT_209s0002g00750	48.038	2.8215	0.541198	5.21344	1.85e-07	9.59e-07
1514	VIT_219s0014g04930	300.26	2.8212	0.355455	7.93687	2.07e-15	2.03e-14
1515	VIT_217s0000g03720	393.767	2.81781	0.217724	12.9421	2.6e-38	6.36e-37
1516	VIT_212s0134g00460	88.0513	2.81594	0.446239	6.31039	2.78e-10	1.89e-09
1517	VIT_213s0019g01430	61509.9	2.81472	0.119783	23.4984	4.23e-122	9.23e-120
1518	VIT_210s0003g05330	1693.22	2.81416	0.181228	15.5283	2.23e-54	9.23e-53
1519	VIT_205s0077g02010	7.20549	2.80533	1.17749	2.38246	0.0171976	0.0386255
1520	VIT_206s0004g07930	351.515	2.80281	0.273685	10.241	1.3e-24	1.97e-23
1521	VIT_211s0016g05060	331.711	2.80209	0.236865	11.8299	2.73e-32	5.41e-31
1522	VIT_212s0059g01280	14.2666	2.80175	0.983473	2.84884	0.00438793	0.011429
1523	VIT_205s0020g00840	22.5664	2.80146	0.775375	3.61303	0.000302635	0.00100105
1524	VIT_200s0204g00120	8.88381	2.79891	1.08171	2.5875	0.0096676	0.0232299
1525	VIT_205s0077g01850	157.003	2.79621	0.2812	9.94388	2.68e-23	3.87e-22
1526	VIT_218s0001g06110	1213.04	2.79519	0.224664	12.4416	1.55e-35	3.46e-34
1527	VIT_201s0146g00020	578.772	2.79411	0.183536	15.2238	2.46e-52	9.42e-51
1528	VIT_219s0014g02580	52.451	2.79355	0.577058	4.84102	1.29e-06	6.03e-06
1529	VIT_200s0304g00070	223.921	2.79246	0.381883	7.31235	2.63e-13	2.24e-12
1530	VIT_212s0028g01410	1381.18	2.79064	0.265614	10.5064	8.07e-26	1.29e-24
1531	VIT_217s0000g01290	63.2386	2.78895	0.969365	2.87709	0.00401356	0.0105508
1532	VIT_201s0011g04630	2743.88	2.78733	0.140582	19.827	1.74e-87	1.74e-85
1533	VIT_213s0084g00810	123.376	2.78706	0.412869	6.75046	1.47e-11	1.1e-10
1534	VIT_215s0048g02260	386.821	2.78635	0.269626	10.3342	4.94e-25	7.62e-24
1535	VIT_213s0047g01210	779.956	2.78633	0.239675	11.6255	3.06e-31	5.82e-30
1536	VIT_208s0007g07190	200.168	2.78198	0.504903	5.50993	3.59e-08	1.99e-07
1537	VIT_207s0031g00500	31.1867	2.77619	1.20407	2.30567	0.0211292	0.046421
1538	VIT_211s0206g00120	1229.51	2.77593	0.200676	13.8329	1.61e-43	4.72e-42
1539	VIT_201s0026g00980	1359.02	2.77576	0.20744	13.381	7.81e-41	2.07e-39
1540	VIT_203s0088g00320	2491.57	2.77313	0.241523	11.4818	1.63e-30	3.04e-29
1541	VIT_218s0082g00018	20.5685	2.77227	0.731408	3.79032	0.000150451	0.000525581
1542	VIT_211s0016g02950	1013.27	2.77058	0.21987	12.601	2.08e-36	4.82e-35
1543	VIT_207s0005g06010	14.426	2.76893	1.01748	2.72135	0.00650155	0.0163258
1544	VIT_219s0014g02630	81.9513	2.7601	0.330256	8.35746	6.41e-17	6.87e-16
1545	VIT_207s0197g00130	2068.14	2.76008	0.218639	12.6239	1.56e-36	3.61e-35
1546	VIT_202s0025g03520	2680.17	2.7575	0.166381	16.5734	1.08e-61	5.44e-60
1547	VIT_200s0480g00040	183.13	2.75714	0.735747	3.7474	0.000178678	0.00061565
1548	VIT_207s0129g00350	370.835	2.75573	0.284785	9.67652	3.79e-22	5.23e-21
1549	VIT_207s0005g04880	41.8656	2.75205	0.589695	4.6669	3.06e-06	1.36e-05
1550	VIT_213s0064g00270	295.004	2.75063	0.341827	8.04685	8.5e-16	8.52e-15
1551	VIT_207s0104g01460	358.365	2.75008	0.214258	12.8354	1.04e-37	2.48e-36
1552	VIT_207s0151g00590	17.9595	2.74965	0.737411	3.72879	0.000192398	0.000659765
1553	VIT_206s0004g03670	976.539	2.74884	0.186334	14.7522	2.98e-49	1.04e-47
1554	VIT_207s0197g00170	3484.3	2.74452	0.183796	14.9325	2.03e-50	7.28e-49
1555	VIT_205s0165g00220	13.5492	2.74299	1.04103	2.63487	0.00841695	0.0205506
1556	VIT_203s0017g00660	49.7897	2.74121	0.465845	5.88437	4e-09	2.46e-08
1557	VIT_203s0091g00050	537.519	2.74087	0.185645	14.764	2.5e-49	8.75e-48
1558	VIT_210s0003g03510	1173.97	2.74011	0.207416	13.2107	7.61e-40	1.96e-38
1559	VIT_208s0056g00430	75.2904	2.74002	0.547067	5.00857	5.48e-07	2.68e-06
1560	VIT_207s0129g01050	2953.46	2.73846	0.18043	15.1774	4.99e-52	1.89e-50
1561	VIT_217s0000g01930	42.243	2.73705	0.662972	4.12845	3.65e-05	0.00013998
1562	VIT_218s0001g03990	932.496	2.73451	0.146469	18.6695	8.77e-78	6.8e-76
1563	VIT_213s0019g03120	163.578	2.73416	0.376933	7.25372	4.05e-13	3.4e-12
1564	VIT_207s0005g01140	40.1	2.73359	0.70453	3.88002	0.000104447	0.000374169
1565	VIT_202s0087g00586	9.24316	2.73325	0.998948	2.73613	0.0062167	0.01568
1566	VIT_210s0003g01680	3042.41	2.73269	0.175653	15.5573	1.42e-54	5.92e-53
1567	VIT_212s0034g02400	19.5164	2.72966	0.803026	3.39922	0.000675774	0.00208585
1568	VIT_207s0141g00490	17.508	2.72925	0.801656	3.40452	0.000662798	0.00205026
1569	VIT_213s0064g01750	32.6774	2.7267	1.01166	2.69527	0.00703312	0.0175232
1570	VIT_200s0590g00010	72.2261	2.72146	0.348915	7.7998	6.2e-15	5.89e-14
1571	VIT_206s0004g06580	486.909	2.72113	0.209241	13.0047	1.15e-38	2.84e-37
1572	VIT_211s0016g03590	91.743	2.71907	0.424202	6.40983	1.46e-10	1.01e-09
1573	VIT_213s0019g00580	11.6509	2.71785	0.890202	3.05307	0.00226514	0.00628152
1574	VIT_206s0004g05090	4971.96	2.71632	0.17927	15.1521	7.34e-52	2.76e-50
1575	VIT_216s0098g00190	346.331	2.71319	0.327291	8.28984	1.13e-16	1.2e-15
1576	VIT_203s0038g01390	10.7905	2.71246	1.13654	2.38659	0.0170056	0.0382765
1577	VIT_207s0185g00040	77.4628	2.71141	0.358021	7.57331	3.64e-14	3.29e-13
1578	VIT_218s0001g05710	1994.32	2.70982	0.15906	17.0365	4.4e-65	2.47e-63
1579	VIT_213s0019g04710	2197.97	2.70932	0.211449	12.8131	1.38e-37	3.29e-36
1580	VIT_215s0046g02380	117.545	2.7093	0.438675	6.17609	6.57e-10	4.34e-09
1581	VIT_204s0044g00560	10.0745	2.70832	1.15284	2.34927	0.0188103	0.0418779
1582	VIT_207s0005g06500	28.738	2.70812	0.685424	3.95101	7.78e-05	0.000284487
1583	VIT_215s0048g01420	55.9881	2.70777	0.569419	4.75532	1.98e-06	9.02e-06
1584	VIT_205s0020g00620	10.2223	2.70706	1.12195	2.41282	0.0158298	0.0359029
1585	VIT_202s0236g00100	697.166	2.70479	0.359787	7.51777	5.57e-14	4.98e-13
1586	VIT_213s0084g00130	1736.91	2.70425	0.264856	10.2103	1.78e-24	2.69e-23
1587	VIT_208s0007g06610	51.9241	2.69992	0.603416	4.47439	7.66e-06	3.23e-05
1588	VIT_217s0000g00290	334.496	2.69816	0.26651	10.124	4.32e-24	6.42e-23
1589	VIT_213s0019g02200	3021.57	2.69729	0.213786	12.6168	1.71e-36	3.95e-35
1590	VIT_214s0068g00300	47.0532	2.69564	0.603864	4.46399	8.04e-06	3.37e-05
1591	VIT_214s0066g02080	1057.83	2.69002	0.205478	13.0915	3.68e-39	9.25e-38
1592	VIT_202s0025g04280	171.509	2.68861	0.430111	6.25096	4.08e-10	2.74e-09
1593	VIT_217s0000g03930	19.4943	2.6885	0.71507	3.75978	0.000170065	0.000588628
1594	VIT_213s0019g00480	541.283	2.68805	0.283363	9.48623	2.4e-21	3.21e-20
1595	VIT_214s0108g01590	16.3504	2.68749	0.837512	3.20889	0.00133247	0.00387368
1596	VIT_206s0004g06850	25.2403	2.68714	0.808706	3.32277	0.000891298	0.00268227
1597	VIT_208s0040g00990	562.443	2.68409	0.16976	15.8111	2.61e-56	1.14e-54
1598	VIT_207s0031g01505	46.7329	2.67987	0.540805	4.95534	7.22e-07	3.48e-06
1599	VIT_208s0007g01690	714.15	2.67825	0.268653	9.96918	2.08e-23	3.02e-22
1600	VIT_205s0062g00790	1391.4	2.67768	0.217053	12.3365	5.76e-35	1.25e-33
1601	VIT_215s0024g00400	2032.39	2.67592	0.241207	11.0939	1.34e-28	2.35e-27
1602	VIT_203s0038g03960	6223.28	2.67544	0.183802	14.5561	5.34e-48	1.81e-46
1603	VIT_218s0041g01340	1467.96	2.67542	0.232199	11.5221	1.02e-30	1.91e-29
1604	VIT_216s0013g00070	17.7423	2.67381	1.14044	2.34454	0.0190506	0.0423417
1605	VIT_202s0033g01375	91.4561	2.67234	0.365982	7.30184	2.84e-13	2.41e-12
1606	VIT_218s0041g02120	589.553	2.67216	0.254391	10.5041	8.27e-26	1.32e-24
1607	VIT_211s0016g05070	51.6065	2.669	0.406472	6.56625	5.16e-11	3.69e-10
1608	VIT_218s0001g07770	1298.43	2.66726	0.239225	11.1496	7.2e-29	1.27e-27
1609	VIT_217s0000g09190	1417.59	2.66543	0.189362	14.0759	5.34e-45	1.65e-43
1610	VIT_208s0007g07670	185.839	2.66308	0.433515	6.143	8.1e-10	5.29e-09
1611	VIT_207s0151g00680	11.561	2.65959	1.1021	2.41321	0.0158128	0.0358724
1612	VIT_204s0008g05350	606.567	2.6582	0.577528	4.60273	4.17e-06	1.82e-05
1613	VIT_201s0011g01110	355.515	2.64933	0.237927	11.1351	8.47e-29	1.49e-27
1614	VIT_218s0001g12090	64.0389	2.64796	0.456227	5.80405	6.47e-09	3.88e-08
1615	VIT_201s0011g00740	18.2667	2.64716	0.953141	2.7773	0.00548122	0.0139974
1616	VIT_202s0033g01150	1028.81	2.64667	0.15775	16.7776	3.56e-63	1.89e-61
1617	VIT_212s0059g01630	2973.2	2.64582	0.112075	23.6075	3.23e-123	7.36e-121
1618	VIT_207s0031g02240	300.369	2.64537	0.264061	10.018	1.27e-23	1.86e-22
1619	VIT_213s0101g00510	29.2158	2.64511	0.638466	4.14292	3.43e-05	0.000132094
1620	VIT_211s0016g03330	2206.42	2.64433	0.213082	12.4099	2.31e-35	5.1e-34
1621	VIT_218s0089g00010	15.5266	2.64407	0.784027	3.37242	0.000745102	0.00227858
1622	VIT_214s0006g01400	554.398	2.64276	0.229349	11.5229	1.01e-30	1.9e-29
1623	VIT_216s0022g00680	37.8056	2.63752	0.755606	3.4906	0.000481942	0.00152991
1624	VIT_206s0080g00910	75.9301	2.63533	0.475416	5.5432	2.97e-08	1.66e-07
1625	VIT_205s0020g01400	2648.16	2.63437	0.171175	15.3899	1.91e-53	7.64e-52
1626	VIT_204s0023g00390	15.3989	2.63228	0.811585	3.24338	0.00118122	0.00346905
1627	VIT_203s0097g00570	8749.1	2.63164	0.138735	18.9689	3.08e-80	2.55e-78
1628	VIT_205s0020g00440	77.1293	2.63051	0.485931	5.41334	6.19e-08	3.34e-07
1629	VIT_218s0001g07500	1345.13	2.62842	0.189314	13.884	7.92e-44	2.34e-42
1630	VIT_207s0141g00770	524.016	2.62808	0.215902	12.1726	4.35e-34	9.27e-33
1631	VIT_212s0134g00160	37.343	2.62802	0.960019	2.73747	0.00619145	0.0156302
1632	VIT_202s0025g03290	805.564	2.62552	0.189866	13.8282	1.72e-43	5.02e-42
1633	VIT_214s0066g02180	21.1348	2.62432	0.819825	3.20107	0.00136918	0.00396995
1634	VIT_212s0035g00330	32.604	2.62371	0.665415	3.94297	8.05e-05	0.000293118
1635	VIT_206s0004g08200	721.953	2.62089	0.221617	11.8262	2.86e-32	5.65e-31
1636	VIT_206s0004g01520	17.1652	2.6151	0.740468	3.53169	0.000412917	0.00132864
1637	VIT_217s0000g05410	293.211	2.61302	0.266671	9.79868	1.14e-22	1.61e-21
1638	VIT_205s0020g04930	13.2651	2.61217	0.787941	3.31519	0.000915809	0.00274729
1639	VIT_203s0038g01380	4058.51	2.61149	0.151894	17.1928	3.01e-66	1.73e-64
1640	VIT_219s0027g00840	10.9893	2.61093	0.890306	2.93262	0.00336114	0.00898327
1641	VIT_213s0019g04200	602.391	2.61009	0.242262	10.7738	4.58e-27	7.56e-26
1642	VIT_212s0028g01390	147.936	2.60842	0.471985	5.5265	3.27e-08	1.82e-07
1643	VIT_214s0006g03180	18.9689	2.60637	0.901563	2.89095	0.00384079	0.0101356
1644	VIT_206s0004g08260	6517.42	2.60555	0.160927	16.1909	5.85e-59	2.75e-57
1645	VIT_203s0063g01780	2292.41	2.60533	0.221661	11.7536	6.76e-32	1.31e-30
1646	VIT_215s0045g00640	54.531	2.60528	0.563102	4.62665	3.72e-06	1.63e-05
1647	VIT_218s0001g07780	1159.74	2.60434	0.159292	16.3495	4.39e-60	2.11e-58
1648	VIT_214s0068g01450	215.391	2.60406	0.266211	9.78192	1.35e-22	1.9e-21
1649	VIT_203s0091g00160	864.938	2.60389	0.445891	5.83975	5.23e-09	3.17e-08
1650	VIT_213s0019g01360	576.086	2.6035	0.328136	7.93421	2.12e-15	2.07e-14
1651	VIT_201s0026g01880	2561.51	2.59852	0.1837	14.1455	1.99e-45	6.2e-44
1652	VIT_218s0001g11900	212.439	2.59815	0.25577	10.1581	3.05e-24	4.56e-23
1653	VIT_215s0046g00310	124.152	2.5973	0.498589	5.20931	1.9e-07	9.79e-07
1654	VIT_218s0001g12950	365.776	2.5958	0.202809	12.7992	1.66e-37	3.93e-36
1655	VIT_207s0129g01010	33.4292	2.59493	0.751535	3.45285	0.000554705	0.00174168
1656	VIT_210s0003g04270	321.536	2.59492	0.377685	6.8706	6.39e-12	4.93e-11
1657	VIT_206s0004g07870	20056.8	2.59104	0.130636	19.8341	1.51e-87	1.52e-85
1658	VIT_208s0007g01940	226.421	2.58912	0.298518	8.67324	4.2e-18	4.8e-17
1659	VIT_217s0000g07750	10.0668	2.58888	1.03583	2.49934	0.0124426	0.0289958
1660	VIT_202s0012g00840	109.972	2.5876	0.32774	7.89528	2.9e-15	2.8e-14
1661	VIT_208s0058g01440	514.707	2.58735	0.212027	12.2029	3e-34	6.42e-33
1662	VIT_203s0132g00340	2408.98	2.58732	0.1768	14.6342	1.7e-48	5.84e-47
1663	VIT_204s0023g02950	2288.72	2.587	0.1672	15.4725	5.32e-54	2.19e-52
1664	VIT_206s0004g03620	979.397	2.58585	0.232889	11.1033	1.21e-28	2.12e-27
1665	VIT_201s0011g00420	1900.89	2.58515	0.172607	14.9771	1.04e-50	3.77e-49
1666	VIT_205s0020g01750	17.8871	2.5809	1.11336	2.31811	0.0204432	0.0450986
1667	VIT_213s0019g03930	18.9842	2.57686	0.993578	2.59351	0.00950011	0.0228717
1668	VIT_206s0061g01490	42.4269	2.57636	0.468712	5.49668	3.87e-08	2.14e-07
1669	VIT_202s0025g02460	44.1573	2.57361	0.617288	4.16922	3.06e-05	0.000118684
1670	VIT_212s0028g03720	2675.74	2.57359	0.183491	14.0257	1.09e-44	3.32e-43
1671	VIT_214s0128g00790	696.235	2.57286	0.247674	10.3881	2.81e-25	4.39e-24
1672	VIT_218s0041g01330	2630.09	2.57055	0.213422	12.0444	2.07e-33	4.29e-32
1673	VIT_203s0091g00480	379.798	2.56989	0.221272	11.6141	3.49e-31	6.63e-30
1674	VIT_207s0005g05780	79.0129	2.56767	0.506694	5.0675	4.03e-07	2e-06
1675	VIT_202s0025g00690	1051.43	2.56526	0.152803	16.788	2.99e-63	1.6e-61
1676	VIT_211s0016g02960	160.293	2.56382	0.283012	9.05904	1.32e-19	1.65e-18
1677	VIT_214s0060g02340	337.329	2.56091	0.285979	8.9549	3.4e-19	4.14e-18
1678	VIT_211s0016g00540	14.8857	2.56089	1.05539	2.4265	0.0152453	0.0347121
1679	VIT_206s0004g03370	172.943	2.55998	0.306898	8.34147	7.34e-17	7.86e-16
1680	VIT_206s0004g06630	39.6861	2.55941	0.666432	3.84046	0.000122804	0.00043483
1681	VIT_201s0011g00820	34.1409	2.55852	0.576519	4.43788	9.08e-06	3.79e-05
1682	VIT_201s0011g06270	450.676	2.55469	0.241806	10.5651	4.33e-26	6.96e-25
1683	VIT_207s0197g00150	35.3766	2.55158	0.640635	3.98289	6.81e-05	0.000250874
1684	VIT_205s0094g01330	36.484	2.55019	0.538472	4.73598	2.18e-06	9.86e-06
1685	VIT_208s0032g00760	72.7867	2.54934	0.378809	6.72989	1.7e-11	1.27e-10
1686	VIT_212s0059g01460	733.442	2.54831	0.182126	13.992	1.74e-44	5.24e-43
1687	VIT_200s0366g00015	13.8798	2.54826	0.924139	2.75744	0.00582556	0.0147987
1688	VIT_214s0060g01470	5116.89	2.54581	0.177973	14.3045	2.05e-46	6.57e-45
1689	VIT_200s0207g00190	153.113	2.54542	0.365904	6.95653	3.49e-12	2.74e-11
1690	VIT_213s0019g00310	1603.9	2.54379	0.166857	15.2453	1.77e-52	6.86e-51
1691	VIT_210s0003g02170	20.4867	2.53687	0.775836	3.26986	0.00107602	0.00318316
1692	VIT_208s0007g03380	36.1699	2.53544	0.559205	4.534	5.79e-06	2.48e-05
1693	VIT_212s0028g00930	714.157	2.53454	0.262729	9.64698	5.06e-22	6.94e-21
1694	VIT_217s0000g01830	1465.7	2.53311	0.134125	18.8862	1.48e-79	1.2e-77
1695	VIT_206s0004g00170	232.588	2.53242	0.282701	8.95795	3.31e-19	4.03e-18
1696	VIT_204s0069g00920	2749.27	2.53238	0.180727	14.0121	1.31e-44	3.99e-43
1697	VIT_202s0025g03100	655.648	2.53119	0.320548	7.89644	2.87e-15	2.78e-14
1698	VIT_215s0048g01600	56.7623	2.5299	0.514406	4.91811	8.74e-07	4.17e-06
1699	VIT_213s0067g03660	2703.32	2.52968	0.168624	15.0019	7.13e-51	2.61e-49
1700	VIT_206s0004g04500	10.6696	2.52937	1.00827	2.50862	0.0121203	0.0283477
1701	VIT_213s0019g00340	604.177	2.52784	0.193765	13.0459	6.71e-39	1.67e-37
1702	VIT_218s0001g08580	575.72	2.52495	0.316716	7.97229	1.56e-15	1.53e-14
1703	VIT_209s0096g00100	44.7434	2.52478	0.698877	3.61263	0.000303112	0.00100246
1704	VIT_217s0000g04840	391.492	2.52303	0.230438	10.9489	6.73e-28	1.16e-26
1705	VIT_200s0404g00040	306.671	2.52262	0.20249	12.458	1.26e-35	2.82e-34
1706	VIT_201s0026g00150	104.601	2.52259	0.334638	7.53825	4.76e-14	4.28e-13
1707	VIT_214s0128g00120	12367.8	2.52257	0.194446	12.9731	1.74e-38	4.27e-37
1708	VIT_201s0011g01350	234.287	2.52224	0.340304	7.41174	1.25e-13	1.09e-12
1709	VIT_214s0060g01980	30.1351	2.52145	0.542378	4.64887	3.34e-06	1.48e-05
1710	VIT_205s0020g01450	13.0273	2.52044	0.910009	2.76969	0.00561096	0.0143085
1711	VIT_204s0023g00290	315.219	2.5192	0.260477	9.67151	3.98e-22	5.49e-21
1712	VIT_202s0025g01510	1021.54	2.51744	0.209027	12.0436	2.09e-33	4.33e-32
1713	VIT_214s0068g01440	84.7692	2.51575	0.395562	6.35994	2.02e-10	1.39e-09
1714	VIT_219s0015g02410	166.341	2.51455	0.369852	6.7988	1.05e-11	7.99e-11
1715	VIT_219s0014g00810	42.2892	2.51151	0.544348	4.6138	3.95e-06	1.73e-05
1716	VIT_211s0016g00480	303.398	2.50878	0.200192	12.5319	4.99e-36	1.13e-34
1717	VIT_213s0156g00030	15.9868	2.50658	0.792242	3.16391	0.00155664	0.00446908
1718	VIT_219s0014g00270	28.2279	2.50587	0.691188	3.62546	0.000288453	0.000957649
1719	VIT_207s0129g00420	46.6075	2.50514	0.579925	4.31976	1.56e-05	6.32e-05
1720	VIT_219s0014g02640	1386.62	2.50277	0.162031	15.4462	8e-54	3.24e-52
1721	VIT_206s0004g04850	140.35	2.50258	0.334482	7.48195	7.32e-14	6.49e-13
1722	VIT_207s0005g04510	15.3811	2.49926	0.978282	2.55474	0.0106267	0.0252139
1723	VIT_216s0013g00220	131.984	2.49724	0.342137	7.29894	2.9e-13	2.46e-12
1724	VIT_206s0004g04120	21.3167	2.495	0.932615	2.67527	0.00746693	0.0184996
1725	VIT_214s0006g01990	2517.5	2.49399	0.171695	14.5257	8.33e-48	2.81e-46
1726	VIT_213s0074g00580	1932.63	2.48659	0.190328	13.0648	5.23e-39	1.3e-37
1727	VIT_214s0060g00890	48.6811	2.48286	0.537173	4.62209	3.8e-06	1.67e-05
1728	VIT_209s0002g08020	80.0877	2.48048	0.479727	5.17062	2.33e-07	1.19e-06
1729	VIT_200s0225g00010	1817.61	2.48039	0.156356	15.8637	1.13e-56	4.97e-55
1730	VIT_219s0090g01490	5113.46	2.47927	0.194162	12.7691	2.44e-37	5.77e-36
1731	VIT_216s0013g01930	159.068	2.47924	0.279222	8.87913	6.74e-19	8.04e-18
1732	VIT_214s0006g01390	72.5598	2.47769	0.390471	6.34539	2.22e-10	1.52e-09
1733	VIT_212s0035g00350	233.152	2.47727	0.283415	8.74079	2.31e-18	2.68e-17
1734	VIT_211s0016g01720	735.29	2.47699	0.188897	13.1129	2.78e-39	7e-38
1735	VIT_219s0015g01543	492.507	2.47635	0.360214	6.87468	6.21e-12	4.8e-11
1736	VIT_211s0016g02920	95.4574	2.47419	0.510177	4.84966	1.24e-06	5.79e-06
1737	VIT_201s0026g00900	372.567	2.47161	0.527109	4.68899	2.75e-06	1.23e-05
1738	VIT_202s0025g04390	37.9102	2.47074	0.552846	4.46913	7.85e-06	3.3e-05
1739	VIT_210s0003g03750	709.993	2.46836	0.277288	8.9018	5.49e-19	6.61e-18
1740	VIT_213s0067g01070	32932.9	2.46708	0.22105	11.1607	6.35e-29	1.12e-27
1741	VIT_218s0001g05820	25.2027	2.46272	0.518773	4.7472	2.06e-06	9.35e-06
1742	VIT_209s0070g00290	9.44591	2.46046	0.999909	2.46068	0.0138674	0.0318967
1743	VIT_214s0108g01520	708.754	2.45899	0.189216	12.9957	1.29e-38	3.19e-37
1744	VIT_218s0072g00470	107.85	2.45829	0.361418	6.8018	1.03e-11	7.83e-11
1745	VIT_201s0026g01730	314.004	2.4582	0.341647	7.19517	6.24e-13	5.16e-12
1746	VIT_209s0002g01030	68.8834	2.45786	0.53977	4.55354	5.28e-06	2.27e-05
1747	VIT_213s0067g01650	174.018	2.4577	0.245617	10.0062	1.43e-23	2.09e-22
1748	VIT_216s0050g01700	813.903	2.45706	0.195056	12.5967	2.2e-36	5.09e-35
1749	VIT_213s0073g00550	22.2981	2.45585	0.734959	3.34148	0.000833327	0.00252311
1750	VIT_210s0003g01600	1099.81	2.45498	0.183191	13.4012	5.95e-41	1.59e-39
1751	VIT_209s0002g04690	42.5255	2.45413	0.430638	5.69884	1.21e-08	7.02e-08
1752	VIT_218s0122g00990	130.058	2.4541	0.30904	7.94105	2e-15	1.96e-14
1753	VIT_215s0024g00800	234.881	2.4505	0.218854	11.197	4.22e-29	7.54e-28
1754	VIT_208s0040g01290	9.79169	2.45025	1.00536	2.43719	0.0148021	0.0338075
1755	VIT_216s0050g02480	8963.8	2.44915	0.185406	13.2096	7.72e-40	1.98e-38
1756	VIT_201s0011g03070	4604.62	2.44854	0.253957	9.64153	5.34e-22	7.29e-21
1757	VIT_201s0137g00670	368.885	2.4465	0.280553	8.7203	2.77e-18	3.19e-17
1758	VIT_208s0007g00480	688.781	2.44615	0.176987	13.8211	1.9e-43	5.52e-42
1759	VIT_219s0014g03380	62.8254	2.44419	0.454208	5.38122	7.4e-08	3.97e-07
1760	VIT_213s0047g00080	98.7412	2.44096	0.462052	5.28288	1.27e-07	6.68e-07
1761	VIT_210s0116g00080	21.2695	2.43975	0.74561	3.27215	0.00106735	0.00315938
1762	VIT_211s0016g00820	1474.48	2.4383	0.149126	16.3506	4.31e-60	2.08e-58
1763	VIT_204s0069g00780	31.2182	2.43814	1.01587	2.40005	0.016393	0.0370362
1764	VIT_203s0097g00530	6740.83	2.43553	0.15791	15.4235	1.14e-53	4.57e-52
1765	VIT_218s0072g00100	667.883	2.43552	0.186497	13.0593	5.63e-39	1.4e-37
1766	VIT_216s0022g02060	612.703	2.43226	0.150045	16.2102	4.27e-59	2.02e-57
1767	VIT_219s0014g02550	96.3599	2.43048	0.538736	4.51145	6.44e-06	2.74e-05
1768	VIT_218s0001g15120	5829.9	2.42614	0.205541	11.8037	3.73e-32	7.34e-31
1769	VIT_215s0046g03190	8.76582	2.42487	1.01348	2.39261	0.0167289	0.037718
1770	VIT_205s0062g01190	265.068	2.42482	0.328694	7.37715	1.62e-13	1.4e-12
1771	VIT_205s0029g01270	24.0047	2.42379	0.755465	3.20835	0.00133501	0.00388049
1772	VIT_209s0054g00910	77.8268	2.42284	0.464106	5.22044	1.78e-07	9.25e-07
1773	VIT_217s0000g03380	281.662	2.421	0.272386	8.88815	6.21e-19	7.43e-18
1774	VIT_202s0025g03590	153.159	2.42021	0.31501	7.68296	1.55e-14	1.44e-13
1775	VIT_217s0000g00140	207.448	2.42004	0.28835	8.3927	4.75e-17	5.12e-16
1776	VIT_205s0049g00090	114.652	2.41793	0.413546	5.84682	5.01e-09	3.04e-08
1777	VIT_203s0017g02140	92.3713	2.41784	0.44163	5.4748	4.38e-08	2.4e-07
1778	VIT_214s0108g00600	115.534	2.41755	0.415929	5.81242	6.16e-09	3.7e-08
1779	VIT_204s0008g06310	698.536	2.41705	0.193506	12.4908	8.38e-36	1.88e-34
1780	VIT_210s0071g01060	33.4219	2.41538	0.52663	4.5865	4.51e-06	1.96e-05
1781	VIT_216s0100g00470	1814.91	2.41366	0.172205	14.0162	1.24e-44	3.78e-43
1782	VIT_218s0001g01940	814.819	2.41272	0.211983	11.3817	5.16e-30	9.48e-29
1783	VIT_208s0007g08410	918.363	2.41247	0.170551	14.1452	2e-45	6.21e-44
1784	VIT_218s0001g06460	95.4992	2.4123	0.388131	6.21517	5.13e-10	3.41e-09
1785	VIT_206s0004g06320	271.456	2.41158	0.201467	11.9701	5.1e-33	1.04e-31
1786	VIT_212s0057g00670	2476.04	2.41142	0.131923	18.279	1.22e-74	8.42e-73
1787	VIT_217s0000g02020	375.402	2.41102	0.244642	9.85528	6.5e-23	9.26e-22
1788	VIT_208s0007g06580	294.281	2.40794	0.338696	7.10943	1.17e-12	9.44e-12
1789	VIT_204s0008g05930	9.71245	2.40705	0.8397	2.86656	0.00414965	0.0108769
1790	VIT_200s1665g00010	3523.35	2.40703	0.189969	12.6706	8.6e-37	2.02e-35
1791	VIT_207s0104g00850	13.7013	2.40463	1.0164	2.36582	0.0179901	0.0401963
1792	VIT_214s0066g00170	139.825	2.40437	0.234958	10.2332	1.41e-24	2.13e-23
1793	VIT_214s0006g02750	82.089	2.39582	0.409289	5.85361	4.81e-09	2.93e-08
1794	VIT_214s0006g01030	218.331	2.39372	0.283458	8.44468	3.05e-17	3.32e-16
1795	VIT_217s0000g02050	2057.42	2.39353	0.235289	10.1728	2.62e-24	3.94e-23
1796	VIT_217s0000g09120	1551.01	2.39239	0.152198	15.7189	1.12e-55	4.81e-54
1797	VIT_204s0008g05850	2243.12	2.39025	0.191075	12.5095	6.62e-36	1.49e-34
1798	VIT_218s0072g00370	917.71	2.3878	0.192879	12.3797	3.36e-35	7.39e-34
1799	VIT_210s0003g01730	10148.1	2.38703	0.202634	11.78	4.95e-32	9.69e-31
1800	VIT_204s0023g00690	3308.91	2.38677	0.168903	14.131	2.45e-45	7.58e-44
1801	VIT_212s0055g00250	507.414	2.38453	0.490931	4.85717	1.19e-06	5.59e-06
1802	VIT_207s0197g00240	4563.18	2.3842	0.217535	10.96	5.95e-28	1.02e-26
1803	VIT_204s0008g02510	1780.37	2.38188	0.22726	10.4808	1.06e-25	1.68e-24
1804	VIT_202s0012g02700	45.5806	2.37931	0.446939	5.32356	1.02e-07	5.38e-07
1805	VIT_218s0001g05220	4437.38	2.37919	0.155459	15.3043	7.16e-53	2.82e-51
1806	VIT_200s0978g00020	32.4146	2.37629	0.643766	3.69124	0.000223165	0.000755427
1807	VIT_214s0006g02083	59.0936	2.37567	0.502007	4.73234	2.22e-06	1e-05
1808	VIT_219s0090g00600	31.9419	2.37123	0.694773	3.41295	0.000642633	0.00199161
1809	VIT_204s0044g00050	49.1553	2.36557	0.506596	4.66955	3.02e-06	1.34e-05
1810	VIT_217s0000g01810	4255.16	2.36499	0.144941	16.3169	7.49e-60	3.59e-58
1811	VIT_208s0007g03330	35.9262	2.36248	0.482047	4.90093	9.54e-07	4.53e-06
1812	VIT_204s0023g00280	182.144	2.36049	0.234343	10.0728	7.29e-24	1.07e-22
1813	VIT_200s2539g00010	44.9381	2.36034	0.639253	3.69234	0.000222202	0.000752762
1814	VIT_208s0032g01150	5774.03	2.3602	0.217176	10.8677	1.64e-27	2.76e-26
1815	VIT_214s0171g00380	2798.69	2.35963	0.121665	19.3945	8.59e-84	7.85e-82
1816	VIT_205s0094g01570	776.194	2.35943	0.217779	10.8341	2.37e-27	3.97e-26
1817	VIT_219s0014g03840	40.3042	2.35871	0.556726	4.23675	2.27e-05	9e-05
1818	VIT_204s0008g01070	8880.18	2.35657	0.196044	12.0206	2.77e-33	5.68e-32
1819	VIT_217s0000g01970	4545.15	2.35599	0.172309	13.673	1.47e-42	4.13e-41
1820	VIT_204s0008g06250	257.544	2.35566	0.249435	9.44399	3.59e-21	4.77e-20
1821	VIT_203s0088g01200	470.404	2.35554	0.158915	14.8227	1.05e-49	3.7e-48
[truncated: 2,825 more rows]

## Sheet: R6-R5
	GENE ID	base Mean	log2FoldChange	lfcSE	Stat	P value	P adj
[truncated: 2,539 more rows]

[truncated: 2 more sheets: R7-R6, R8-R7]
