# Supplementary material for: Transcriptome Profiling of a Salt Excluder Hybrid Grapevine Rootstock ‘Ruggeri’ throughout Salinity
Source: Plants (Basel). 2024 Mar 14;13(6):837. doi: 10.3390/plants13060837 (PMC10974295; doi:10.3390/plants13060837)
Supplement: Supplementary file 1 [file plants-13-00837-s001.zip › Tabel S3.xlsx]

## Sheet: K1
Table S3: The gene list of each K-mean cluster including their transcript per million (TPM) values and annotation information. Each sheet tab contains gene list of each cluster (K1 - K15).
	GENE ID	Sample Time Points								X.pacId	Transcript Name	Peptide Name	Pfam	Panther	KOG	ec	KO	GO	Best Hit Arabi. Name	Arabi Symbol	Arabi. Defline	Fit Cluster
		Control	Salt Stress					Recovery
			0 h	0.5 h	2 h	24 h	48 h	4 d	12 d
1	VIT_200s0125g00170	10.1624	12.4901	11.8844	11.5434	11.9192	10.5364	11.8415	14.5644	38047470	VIT_200s0125g00170.1	VIT_200s0125g00170.1	PF09262,PF00004	PTHR23077,PTHR23077:SF12			K13338	GO:0007031,GO:0005777,GO:0005524,GO:0042623,GO:0006625,GO:0005778	AT5G08470.1	PEX1	peroxisome 1	K1
2	VIT_200s0169g00040	0.887028	0.133497	0.511093	0.694242	0.835081	0.563554	0.0544957	1.45009	38048245	VIT_200s0169g00040.1	VIT_200s0169g00040.1	PF16987	PTHR33137					AT1G15780.1			K1
3	VIT_200s0179g00140	5.2181	2.06225	2.75684	3.70675	3.66278	3.58979	4.83274	5.27096	38049703	VIT_200s0179g00140.1	VIT_200s0179g00140.1	PF00481	PTHR13832,PTHR13832:SF347	KOG0698	3.1.3.16		GO:0003824,GO:0006470,GO:0004722	AT3G63340.1		Protein phosphatase 2C family protein	K1
4	VIT_200s0179g00210	11.4411	14.0178	13.5946	14.1189	15.1416	12.8569	15.4815	15.9429	38048310	VIT_200s0179g00210.1	VIT_200s0179g00210.1	PF00400,PF14844,PF02138	PTHR13743,PTHR13743:SF84				GO:0005515	AT4G02660.1		Beige/BEACH domain ;WD domain, G-beta repeat protein	K1
5	VIT_200s0179g00260	19.0899	15.7821	4.96463	4.85041	73.4962	11.4436	11.4383	125.11	38050179	VIT_200s0179g00260.1	VIT_200s0179g00260.1	PF00690,PF12710,PF00689,PF00122	PTHR24093,PTHR24093:SF292		3.6.3.8	K01537	GO:0046872,GO:0000166	AT3G63380.1		ATPase E1-E2 type family protein / haloacid dehalogenase-like hydrolase family protein	K1
6	VIT_200s0179g00350	7.21267	3.6666	3.33604	2.62899	11.3039	3.20425	2.14653	14.7597	38050588	VIT_200s0179g00350.1	VIT_200s0179g00350.1	PF02887,PF00224	PTHR11817,PTHR11817:SF14	KOG2323	2.7.1.40	K00873	GO:0030955,GO:0006096,GO:0004743,GO:0000287	AT3G22960.1	PKP-ALPHA,PKP1	Pyruvate kinase family protein	K1
7	VIT_200s0181g00050	1.24811	0.296022	0.851514	2.18157	1.68402	0.226852	0.894589	3.35606	38047523	VIT_200s0181g00050.1	VIT_200s0181g00050.1		PTHR37746,PTHR37746:SF1					AT4G21500.1			K1
8	VIT_200s0181g00220	4.12446	6.9062	1.76905	1.56503	12.3631	5.52229	3.49875	8.75529	38049524	VIT_200s0181g00220.1	VIT_200s0181g00220.1	PF07887	PTHR31713,PTHR31713:SF12				GO:0006950,GO:0005516	AT2G18750.2		Calmodulin-binding protein	K1
9	VIT_200s0181g00250	8.0887	7.70314	4.12877	6.11757	12.9617	8.28583	7.84035	13.208	38047806	VIT_200s0181g00250.1	VIT_200s0181g00250.1	PF00781	PTHR12358,PTHR12358:SF42		2.7.1.91	K04718	GO:0016301	AT4G21540.1	SPHK1	sphingosine kinase 1	K1
10	VIT_200s0181g00260	10.795	13.2097	14.0662	14.8834	16.2721	11.9054	13.733	22.7388	38049836	VIT_200s0181g00260.1	VIT_200s0181g00260.1	PF02362	PTHR23336,PTHR23336:SF10				GO:0003677	AT4G32010.1	HSI2-L1,HSL1,VAL2	HSI2-like 1	K1
11	VIT_200s0187g00290	8.8765	11.4319	11.1834	15.2267	18.606	7.46469	10.9781	25.3293	38048304	VIT_200s0187g00290.1	VIT_200s0187g00290.1	PF02179	PTHR33322,PTHR33322:SF5				GO:0051087	AT1G12060.1	ATBAG5,BAG5	BCL-2-associated athanogene 5	K1
12	VIT_200s0193g00160	3.56658	3.87919	2.8727	2.38204	3.45716	1.5892	2.3703	5.19572	38047814	VIT_200s0193g00160.1	VIT_200s0193g00160.1		PTHR24177,PTHR24177:SF32					AT3G18670.1		Ankyrin repeat family protein	K1
13	VIT_200s0199g00090	0	0	0	0	1.52844	0.121526	0.29285	1.27143	38048201	VIT_200s0199g00090.1	VIT_200s0199g00090.1		PTHR31110,PTHR31110:SF4					AT4G24610.2			K1
14	VIT_200s0203g00100	17.7805	19.5225	14.3786	18.3189	14.4164	15.1565	20.1026	19.2575	38047862	VIT_200s0203g00100.1	VIT_200s0203g00100.1	PF03109	PTHR10566,PTHR10566:SF93	KOG1236	3.6.3.46	K08869		AT1G11390.1		Protein kinase superfamily protein	K1
15	VIT_200s0203g00170	10.9173	4.95078	3.35465	4.7571	9.36726	6.12688	6.81851	13.0292	38049975	VIT_200s0203g00170.1	VIT_200s0203g00170.1	PF00249	PTHR10641,PTHR10641:SF586	KOG0048		K09422		AT4G05100.1	AtMYB74,MYB74	myb domain protein 74	K1
16	VIT_200s0214g00150	5.77773	2.20295	1.96744	3.08608	5.28529	4.01344	2.27196	10.7466	38050743	VIT_200s0214g00150.1	VIT_200s0214g00150.1	PF14299	PTHR32278,PTHR32278:SF6					AT2G02230.1	AtPP2-B1,PP2-B1	phloem protein 2-B1	K1
17	VIT_200s0214g00160	7.97072	2.7286	3.8965	5.82916	7.38901	4.14609	4.75494	10.7762	38050385	VIT_200s0214g00160.1	VIT_200s0214g00160.1	PF00646,PF14299	PTHR32278,PTHR32278:SF6				GO:0005515	AT2G02230.1	AtPP2-B1,PP2-B1	phloem protein 2-B1	K1
18	VIT_200s0218g00010	27.9451	11.4809	4.62434	12.3458	71.3616	21.6296	40.3211	80.7164	38048725	VIT_200s0218g00010.1	VIT_200s0218g00010.1	PF00107,PF08240	PTHR11695,PTHR11695:SF588	KOG0023	1.1.1.195		GO:0055114,GO:0016491,GO:0008270	AT4G39330.1	ATCAD9,CAD9	cinnamyl alcohol dehydrogenase 9	K1
19	VIT_200s0220g00150	0.720037	0.0227017	0	0.225488	2.99102	1.86562	1.76595	5.71907	38048048	VIT_200s0220g00150.1	VIT_200s0220g00150.1	PF12708	PTHR31375,PTHR31375:SF27		3.2.1.15			AT3G59850.1		Pectin lyase-like superfamily protein	K1
20	VIT_200s0229g00200	1.70171	0.219362	0.11831	0.145766	3.17304	1.8688	0.533848	2.80258	38050735	VIT_200s0229g00200.1	VIT_200s0229g00200.1		PTHR11361,PTHR11361:SF21					AT4G17380.1	ATMSH4,MSH4	MUTS-like protein 4	K1
21	VIT_200s0231g00070	10.7341	2.78774	1.78251	1.52193	22.9542	5.40669	4.10686	29.2906	38049476	VIT_200s0231g00070.1	VIT_200s0231g00070.1	PF03188,PF04526	PTHR23130,PTHR23130:SF95	KOG4293			GO:0016021	AT3G25290.2		Auxin-responsive family protein	K1
22	VIT_200s0238g00070	0	0.194466	0	0	0.489033	0.0439657	0.0339933	0.462479	38047377	VIT_200s0238g00070.1	VIT_200s0238g00070.1		PTHR11017,PTHR11017:SF169					AT4G19510.1		Disease resistance protein (TIR-NBS-LRR class)	K1
23	VIT_200s0245g00050	27.9141	13.9644	17.0474	16.1633	31.4739	21.9354	19.324	30.0587	38050638	VIT_200s0245g00050.1	VIT_200s0245g00050.1	PF01643	PTHR31727,PTHR31727:SF6		3.1.2.14	K10782	GO:0016790,GO:0006633	AT3G25110.1	AtFaTA,FaTA	fatA acyl-ACP thioesterase	K1
24	VIT_200s0250g00030	3.95461	7.94353	3.93337	3.53034	5.64316	4.17288	4.52775	5.54091	38050071	VIT_200s0250g00030.1	VIT_200s0250g00030.1	PF00534	PTHR12526,PTHR12526:SF354					AT5G04480.1		UDP-Glycosyltransferase superfamily protein	K1
25	VIT_200s0262g00080	0.92846	0.455589	0.150277	0.323056	3.18559	0.460615	0.232921	5.18883	38050750	VIT_200s0262g00080.1	VIT_200s0262g00080.1	PF01657,PF07714	PTHR27002,PTHR27002:SF122	KOG1187	2.7.11.1		GO:0006468,GO:0004672	AT4G21410.1	CRK29	cysteine-rich RLK (RECEPTOR-like protein kinase) 29	K1
26	VIT_200s0265g00120	1.8445	1.92469	2.23435	2.93436	4.53317	2.52401	2.09342	3.96429	38047001	VIT_200s0265g00120.1	VIT_200s0265g00120.1	PF04765	PTHR12956,PTHR12956:SF19					AT1G28240.1		Protein of unknown function (DUF616)	K1
27	VIT_200s0299g00010	73.0713	35.9894	54.1612	49.158	82.6408	64.7712	36.3336	115.987	38047667	VIT_200s0299g00010.1	VIT_200s0299g00010.1	PF14749						AT4G16760.1	ACX1,ATACX1	acyl-CoA oxidase 1	K1
28	VIT_200s0301g00070	6.09497	0	0	0	38.6956	36.642	2.03312	47.9855	38049602	VIT_200s0301g00070.1	VIT_200s0301g00070.1		PTHR36615,PTHR36615:SF2								K1
29	VIT_200s0301g00090	9.2479	14.2108	4.15297	4.634	49.3737	12.1687	3.74604	39.1041	38048804	VIT_200s0301g00090.1	VIT_200s0301g00090.1	PF00070	PTHR22912		1.6.5.9	K17871	GO:0055114,GO:0016491	AT2G29990.1	NDA2	alternative NAD(P)H dehydrogenase 2	K1
30	VIT_200s0302g00050	9.67873	7.17945	8.19663	8.06221	8.36841	8.64123	7.93493	10.0661	38049429	VIT_200s0302g00050.1	VIT_200s0302g00050.1	PF01529	PTHR22883		2.3.1.225	K18932	GO:0008270	AT3G51390.1		DHHC-type zinc finger family protein	K1
31	VIT_200s0304g00060	0.839518	0	0.210239	0	1.12442	0.743138	0.783718	1.32774	38047253	VIT_200s0304g00060.1	VIT_200s0304g00060.1	PF13371,PF00085,PF07719,PF13414	PTHR22904,PTHR22904:SF358	KOG0907,KOG0548		K09527	GO:0045454	AT5G65160.1		tetratricopeptide repeat (TPR)-containing protein	K1
32	VIT_200s0304g00070	59.1359	38.7643	26.7587	19.4939	74.285	51.2939	49.8396	81.8647	38050413	VIT_200s0304g00070.1	VIT_200s0304g00070.1	PF01477	PTHR31718,PTHR31718:SF0				GO:0005515	AT2G22170.1		Lipase/lipooxygenase, PLAT/LH2 family protein	K1
33	VIT_200s0316g00026	0.765327	1.41132	0.931368	1.23498	1.24451	0.821795	0.810584	1.592	38049091	VIT_200s0316g00026.1	VIT_200s0316g00026.1	PF00560,PF13855	PTHR27004,PTHR27004:SF21	KOG0472	2.7.11.1		GO:0005515	AT2G34930.1		disease resistance family protein / LRR family protein	K1
34	VIT_200s0317g00070	2.5663	0.66224	0.253514	0	3.24382	0.867796	0.929239	5.28739	38050051	VIT_200s0317g00070.1	VIT_200s0317g00070.1	PF03018	PTHR21495,PTHR21495:SF41					AT1G07730.2		Disease resistance-responsive (dirigent-like protein) family protein	K1
35	VIT_200s0317g00080	1.17088	0.507068	0.082715	0	2.52359	0.781928	0.923164	2.77001	38049080	VIT_200s0317g00080.1	VIT_200s0317g00080.1	PF03018	PTHR21495,PTHR21495:SF51					AT2G39430.1		Disease resistance-responsive (dirigent-like protein) family protein	K1
36	VIT_200s0335g00020	3.12828	2.82901	1.57083	1.36315	2.80719	3.67801	1.50419	4.26963	38049577	VIT_200s0335g00020.1	VIT_200s0335g00020.1		PTHR11017,PTHR11017:SF159					AT4G19530.1		disease resistance protein (TIR-NBS-LRR class) family	K1
37	VIT_200s0346g00110	1.71432	0.584526	0.480024	0.196524	12.9274	2.04982	1.79158	10.3848	38047466	VIT_200s0346g00110.1	VIT_200s0346g00110.1	PF00107,PF08240	PTHR11695,PTHR11695:SF588		1.1.1.195	K00083	GO:0055114,GO:0016491,GO:0008270	AT4G37990.1	ATCAD8,CAD-B2,ELI3,ELI3-2	elicitor-activated gene 3-2	K1
38	VIT_200s0353g00050	18.921	31.1056	9.05313	8.55888	85.5003	21.2672	14.8051	80.9707	38049926	VIT_200s0353g00050.1	VIT_200s0353g00050.1	PF11883,PF08276,PF00954,PF01453,PF07714	PTHR27002,PTHR27002:SF66	KOG1187	2.7.11.1		GO:0004674,GO:0048544,GO:0006468,GO:0004672	AT4G21390.1	B120	S-locus lectin protein kinase family protein	K1
39	VIT_200s0361g00100	5.10528	7.34801	6.45456	6.64507	8.78609	4.87846	4.71426	12.8309	38050114	VIT_200s0361g00100.1	VIT_200s0361g00100.1	PF07721,PF01363	PTHR22835,PTHR22835:SF225				GO:0042802,GO:0046872	AT1G61690.1		phosphoinositide binding	K1
40	VIT_200s0370g00020	16.6673	20.9307	16.6777	12.5903	29.6504	16.7017	18.362	50.9344	38049806	VIT_200s0370g00020.1	VIT_200s0370g00020.1	PF01086	PTHR10639,PTHR10639:SF7				GO:0030132,GO:0030130,GO:0016192,GO:0006886,GO:0005198	AT2G20760.1		Clathrin light chain protein	K1
41	VIT_200s0371g00050	0.683516	0.0645333	0.31047	0.386297	14.7527	2.1717	0.691018	9.54772	38050225	VIT_200s0371g00050.1	VIT_200s0371g00050.1	PF00107,PF08240	PTHR11695,PTHR11695:SF588		1.1.1.195	K00083	GO:0055114,GO:0016491,GO:0008270	AT4G37990.1	ATCAD8,CAD-B2,ELI3,ELI3-2	elicitor-activated gene 3-2	K1
42	VIT_200s0372g00010	6.92412	7.46978	10.154	10.0653	11.8784	6.52542	6.80814	13.3442	38050506	VIT_200s0372g00010.1	VIT_200s0372g00010.1							AT1G61690.1		phosphoinositide binding	K1
43	VIT_200s0373g00010	3.05637	0.662402	0.958369	1.13007	5.31901	1.37857	0.743387	7.1134	38048709	VIT_200s0373g00010.1	VIT_200s0373g00010.1	PF03953,PF00091	PTHR11588,PTHR11588:SF101			K07374	GO:0003924,GO:0007017,GO:0005874	AT1G50010.1	TUA2	tubulin alpha-2 chain	K1
44	VIT_200s0379g00020	9.92309	8.19503	9.67555	10.1393	12.6796	9.70484	11.3903	13.8175	38047092	VIT_200s0379g00020.1	VIT_200s0379g00020.1		PTHR19878,PTHR19878:SF4					AT3G50590.1		Transducin/WD40 repeat-like superfamily protein	K1
45	VIT_200s0379g00070	11.9653	4.15488	13.2376	13.9524	13.1571	12.5282	11.9118	16.896	38049398	VIT_200s0379g00070.1	VIT_200s0379g00070.1		PTHR24349,PTHR24349:SF115	KOG0028,KOG0027	2.7.11.1			AT3G50530.2	CRK	CDPK-related kinase	K1
46	VIT_200s0389g00020	21.9436	19.4843	14.0549	16.6214	30.7282	18.9738	13.6584	32.9654	38050547	VIT_200s0389g00020.1	VIT_200s0389g00020.1	PF01756	PTHR10909,PTHR10909:SF250			K00232	GO:0055114,GO:0006635,GO:0005777,GO:0003997	AT4G16760.1	ACX1,ATACX1	acyl-CoA oxidase 1	K1
47	VIT_200s0404g00100	7.74937	1.37346	0.157437	0	16.5246	4.90575	6.59999	19.7754	38049147	VIT_200s0404g00100.1	VIT_200s0404g00100.1	PF05739,PF00804	PTHR19957,PTHR19957:SF125	KOG0810		K08486	GO:0005515,GO:0016020	AT1G61290.1	ATSYP124,SYP124	syntaxin of plants 124	K1
48	VIT_200s0407g00020	70.7487	279.697	83.5479	39.0062	736.5	123.527	172.023	684.191	38050512	VIT_200s0407g00020.1	VIT_200s0407g00020.1	PF00153	PTHR24089,PTHR24089:SF392			K15104		AT2G22500.1	ATPUMP5,DIC1,UCP5	uncoupling protein 5	K1
49	VIT_200s0429g00010	0.968631	1.36888	0.582649	0.603598	2.71343	0.627554	0.338666	4.56717	38048723	VIT_200s0429g00010.1	VIT_200s0429g00010.1	PF01657,PF07714	PTHR27002,PTHR27002:SF122	KOG1187	2.7.11.1		GO:0006468,GO:0004672	AT4G21410.1	CRK29	cysteine-rich RLK (RECEPTOR-like protein kinase) 29	K1
50	VIT_200s0434g00060	11.3201	10.5909	7.03251	9.41862	16.8351	10.627	12.3463	25.3087	38049679	VIT_200s0434g00060.1	VIT_200s0434g00060.1	PF13967,PF02714	PTHR13018,PTHR13018:SF52				GO:0016020	AT4G35870.1		early-responsive to dehydration stress protein (ERD4)	K1
51	VIT_200s0455g00010	3.72851	0.271001	4.62116	4.56315	3.28731	3.53089	3.28435	4.37653	38047698	VIT_200s0455g00010.1	VIT_200s0455g00010.1	PF00071	PTHR24073,PTHR24073:SF545				GO:0007264,GO:0005525	AT4G17170.1	AT-RAB2,ATRAB-B1B,ATRAB2A,ATRABB1C,RAB-B1B,RAB2A,RABB1C	RAB GTPase homolog B1C	K1
52	VIT_200s0462g00010	24.5784	17.3442	16.9127	13.6306	35.2754	20.4126	24.2806	51.2372	38047728	VIT_200s0462g00010.1	VIT_200s0462g00010.1							AT4G35870.1		early-responsive to dehydration stress protein (ERD4)	K1
53	VIT_200s0463g00025	6.46919	9.06535	0.287725	0.563665	18.1435	4.15776	2.54677	11.8573	38050473	VIT_200s0463g00025.1	VIT_200s0463g00025.1	PF00689	PTHR24093,PTHR24093:SF325		3.6.3.8			AT3G63380.1		ATPase E1-E2 type family protein / haloacid dehalogenase-like hydrolase family protein	K1
54	VIT_200s0467g00020	12.1971	20.8782	5.63312	11.1634	20.8028	4.92575	8.98297	31.8513	38048364	VIT_200s0467g00020.1	VIT_200s0467g00020.1										K1
55	VIT_200s0531g00010	33.2632	31.8751	37.9409	34.8313	30.3647	31.7852	36.8044	41.2468	38050036	VIT_200s0531g00010.1	VIT_200s0531g00010.1		PTHR12663,PTHR12663:SF0			K11267		AT5G47690.3		binding	K1
56	VIT_200s0540g00050	3.681	0.685924	1.0593	1.51259	4.14834	1.71837	0.45648	4.62432	38049050	VIT_200s0540g00050.1	VIT_200s0540g00050.1	PF00704	PTHR11177,PTHR11177:SF219			K01183	GO:0005975,GO:0004553	AT4G19810.1		Glycosyl hydrolase family protein with chitinase insertion domain	K1
57	VIT_200s0583g00030	2.23121	0.4926	1.27227	0.125788	2.65702	1.92355	1.95464	3.43848	38049239	VIT_200s0583g00030.1	VIT_200s0583g00030.1	PF08557,PF00487	PTHR12879			K04712	GO:0006629	AT4G04930.1	DES-1-LIKE	fatty acid desaturase family protein	K1
58	VIT_200s0587g00030	51.0246	27.3964	31.7452	41.7855	272.695	49.4485	60.436	251.391	38050378	VIT_200s0587g00030.1	VIT_200s0587g00030.1		PTHR13780,PTHR13780:SF39					AT5G53750.1		CBS domain-containing protein	K1
59	VIT_200s0615g00010	2.64213	0.262802	0.59474	0.331749	14.3412	2.13444	4.34369	29.3349	38047495	VIT_200s0615g00010.1	VIT_200s0615g00010.1	PF08240,PF00107	PTHR11695,PTHR11695:SF588	KOG0023	1.1.1.195		GO:0055114,GO:0016491,GO:0008270	AT4G37990.1	ATCAD8,CAD-B2,ELI3,ELI3-2	elicitor-activated gene 3-2	K1
60	VIT_200s0615g00020	34.1431	21.574	16.1004	10.8518	121.689	45.5498	52.2076	174.607	38047987	VIT_200s0615g00020.1	VIT_200s0615g00020.1	PF00107,PF08240	PTHR11695,PTHR11695:SF588		1.1.1.195	K00083	GO:0055114,GO:0016491,GO:0008270	AT4G37990.1	ATCAD8,CAD-B2,ELI3,ELI3-2	elicitor-activated gene 3-2	K1
61	VIT_200s0647g00010	16.1253	8.46116	10.7882	12.1383	19.8547	13.0654	13.0977	21.2236	38048397	VIT_200s0647g00010.1	VIT_200s0647g00010.1		PTHR35130,PTHR35130:SF1					AT4G04920.1	SFR6	sensitive to freezing 6	K1
62	VIT_200s0734g00030	18.0036	15.1824	14.8545	8.22333	16.5578	14.7306	12.0493	18.6139	38047929	VIT_200s0734g00030.1	VIT_200s0734g00030.1		PTHR34208,PTHR34208:SF1					AT3G49720.2			K1
63	VIT_200s0743g00030	5.0313	3.91576	0.726986	4.74654	4.96124	4.4505	1.61922	7.17835	38048029	VIT_200s0743g00030.1	VIT_200s0743g00030.1	PF08276,PF07714	PTHR27002,PTHR27002:SF84		2.7.11.1		GO:0006468,GO:0004672	AT1G11330.1		S-locus lectin protein kinase family protein	K1
64	VIT_200s0771g00020	16.5491	20.579	14.9709	11.5718	16.9378	19.1982	13.4458	20.1336	38049261	VIT_200s0771g00020.1	VIT_200s0771g00020.1		PTHR34208,PTHR34208:SF1					AT3G49720.1			K1
65	VIT_200s0862g00010	21.3376	20.8671	19.9003	25.0275	26.094	22.5131	29.7657	30.0276	38047715	VIT_200s0862g00010.1	VIT_200s0862g00010.1		PTHR12663,PTHR12663:SF0			K11267		AT5G47690.3		binding	K1
66	VIT_200s0945g00010	1.77289	0	1.01117	0.916042	4.99535	1.21623	1.93391	3.7273	38050324	VIT_200s0945g00010.1	VIT_200s0945g00010.1	PF04784	PTHR23054,PTHR23054:SF29					AT4G37080.2		Protein of unknown function, DUF547	K1
67	VIT_200s1372g00020	3.21951	12.2893	18.3523	3.94796	38.2531	6.99955	29.3149	23.5902	38048365	VIT_200s1372g00020.1	VIT_200s1372g00020.1		PTHR24073,PTHR24073:SF520					AT1G02130.1	ARA-5,ARA5,ATRAB1B,ATRABD2A,RA-5,RABD2A	RAS 5	K1
68	VIT_200s1389g00010	0.546326	0.549368	0.126526	0.388632	2.33435	0.066534	0.963591	4.1749	38047220	VIT_200s1389g00010.1	VIT_200s1389g00010.1	PF00107,PF08240	PTHR11695,PTHR11695:SF588		1.1.1.195	K00083	GO:0055114,GO:0016491,GO:0008270	AT4G37990.1	ATCAD8,CAD-B2,ELI3,ELI3-2	elicitor-activated gene 3-2	K1
69	VIT_200s1397g00010	10.2221	15.7065	13.7427	18.9642	15.8136	12.1863	17.4489	26.004	38050532	VIT_200s1397g00010.1	VIT_200s1397g00010.1		PTHR19845,PTHR19845:SF5			K18643		AT1G61210.1		Transducin/WD40 repeat-like superfamily protein	K1
70	VIT_200s1405g00010	13.8692	14.909	11.7588	13.8451	19.5424	15.1353	16.7194	19.5575	38049214	VIT_200s1405g00010.1	VIT_200s1405g00010.1		PTHR35130,PTHR35130:SF1					AT4G04920.1	SFR6	sensitive to freezing 6	K1
71	VIT_200s1679g00010	5.42443	16.111	12.1041	12.7092	24.3113	10.9621	5.94006	30.0503	38048825	VIT_200s1679g00010.1	VIT_200s1679g00010.1	PF05340	PTHR34046,PTHR34046:SF1					AT1G35210.1			K1
72	VIT_200s1683g00010	15.852	16.1999	10.1368	12.0844	29.4492	16.8087	10.2413	41.0103	38050160	VIT_200s1683g00010.1	VIT_200s1683g00010.1	PF02151,PF02577	PTHR15160,PTHR15160:SF6			K08999	GO:0005515,GO:0004518	AT5G66050.1		Wound-responsive family protein	K1
73	VIT_200s1737g00010	12.0309	7.67491	7.6177	7.87908	12.0981	8.94045	12.637	14.8388	38050549	VIT_200s1737g00010.1	VIT_200s1737g00010.1	PF01529	PTHR22883,PTHR22883:SF66		2.3.1.225		GO:0008270	AT3G60800.1		DHHC-type zinc finger family protein	K1
74	VIT_200s1787g00005	5.60632	7.5342	2.42316	3.17545	5.13731	3.55443	5.59445	6.56409	38050096	VIT_200s1787g00005.1	VIT_200s1787g00005.1	PF11145	PTHR33389,PTHR33389:SF1					AT4G21700.1		Protein of unknown function (DUF2921)	K1
75	VIT_200s1851g00005	4.1411	5.83924	2.66343	2.96938	4.81925	5.14253	3.22438	7.12706	38047840	VIT_200s1851g00005.1	VIT_200s1851g00005.1	PF13855	PTHR11017,PTHR11017:SF169				GO:0005515	AT4G19500.1		nucleoside-triphosphatases;transmembrane receptors;nucleotide binding;ATP binding	K1
76	VIT_200s2349g00010	68.4498	214.453	66.8056	33.0339	538.543	104.329	134.794	613.426	38050043	VIT_200s2349g00010.1	VIT_200s2349g00010.1	PF00153	PTHR24089,PTHR24089:SF392	KOG0759		K15104		AT2G22500.1	ATPUMP5,DIC1,UCP5	uncoupling protein 5	K1
77	VIT_200s2376g00010	33.3187	52.4304	24.9628	20.2543	250.395	58.3914	50.4228	250.305	38047082	VIT_200s2376g00010.1	VIT_200s2376g00010.1	PF07992	PTHR10632		1.6.5.9	K17871	GO:0055114,GO:0016491	AT4G05020.1	NDB2	NAD(P)H dehydrogenase B2	K1
78	VIT_200s2648g00010	48.2131	66.8825	28.3955	26.3207	290.936	69.1722	67.6578	302.243	38047635	VIT_200s2648g00010.1	VIT_200s2648g00010.1	PF07992			1.6.5.9		GO:0055114,GO:0016491	AT4G28220.1	NDB1	NAD(P)H dehydrogenase B1	K1
79	VIT_201s0010g00060	34.1636	11.926	3.35533	3.33364	51.0361	25.1515	16.6193	49.9287	38028586	VIT_201s0010g00060.1	VIT_201s0010g00060.1	PF13704	PTHR21461,PTHR21461:SF12					AT5G44670.1		Domain of unknown function (DUF23)	K1
80	VIT_201s0010g00630	2.7501	1.46465	2.27943	2.69734	2.48654	2.80182	3.28763	2.88291	38027586	VIT_201s0010g00630.1	VIT_201s0010g00630.1	PF01535,PF13041	PTHR24015,PTHR24015:SF309					AT1G13630.1		Tetratricopeptide repeat (TPR)-like superfamily protein	K1
81	VIT_201s0010g00650	0.732548	0.0782543	0.252602	0.129889	0.922267	0.212916	0.476282	1.29542	38027376	VIT_201s0010g00650.1	VIT_201s0010g00650.1	PF00657	PTHR22835,PTHR22835:SF163		3.1.1.3		GO:0016788	AT5G15720.1	GLIP7	GDSL-motif lipase 7	K1
82	VIT_201s0010g01130	79.56	86.7258	71.9466	67.2527	146.863	67.053	47.3557	168.635	38029452	VIT_201s0010g01130.1	VIT_201s0010g01130.1	PF03446,PF00393	PTHR11811,PTHR11811:SF33		1.1.1.44	K00033	GO:0055114,GO:0004616,GO:0050661,GO:0006098	AT3G02360.2		6-phosphogluconate dehydrogenase family protein	K1
83	VIT_201s0010g01180	122.784	63.6094	44.4564	44.5934	261.38	134.155	79.7915	222.127	38026740	VIT_201s0010g01180.1	VIT_201s0010g01180.1	PF08241,PF05093	PTHR13273	KOG4020			GO:0008168,GO:0008152,GO:0051536,GO:0016226,GO:0005737	AT5G18400.2		Cytokine-induced anti-apoptosis inhibitor 1, Fe-S biogenesis	K1
84	VIT_201s0010g01230	23.8666	22.2894	23.2037	30.3981	20.5322	21.0444	26.195	28.5528	38029033	VIT_201s0010g01230.1	VIT_201s0010g01230.1		PTHR33644,PTHR33644:SF1					AT3G19895.1		RING/U-box superfamily protein	K1
85	VIT_201s0010g01290	7.0173	10.1097	9.43008	5.96702	8.49277	9.20286	8.08009	10.7277	38026741	VIT_201s0010g01290.1	VIT_201s0010g01290.1	PF02622	PTHR31984,PTHR31984:SF5					AT3G19780.1			K1
86	VIT_201s0010g01310	5.30136	6.38445	5.08503	6.01301	5.69313	4.71634	4.72004	6.22306	38027054	VIT_201s0010g01310.1	VIT_201s0010g01310.1		PTHR18929,PTHR18929:SF92		5.3.4.1			AT3G19780.1			K1
87	VIT_201s0010g01430	22.9165	42.3124	32.7763	30.1813	679.307	39.4429	38.6021	530.396	38027205	VIT_201s0010g01430.1	VIT_201s0010g01430.1	PF00168	PTHR10774,PTHR10774:SF82				GO:0005515	AT3G19830.2	NTMC2T5.2,NTMC2TYPE5.2	Calcium-dependent lipid-binding (CaLB domain) family protein	K1
88	VIT_201s0010g01440	12.5053	17.1477	16.662	18.1234	12.1175	14.6325	16.3632	18.0729	38028320	VIT_201s0010g01440.1	VIT_201s0010g01440.1	PF00397,PF01846	PTHR15377,PTHR15377:SF3	KOG0155		K12824	GO:0005515	AT3G19840.1	ATPRP40C,PRP40C	pre-mRNA-processing protein 40C	K1
89	VIT_201s0010g01480	9.59623	12.4261	10.393	12.4709	9.65295	8.55844	8.35327	11.7948	38026547	VIT_201s0010g01480.1	VIT_201s0010g01480.1	PF12796,PF00169,PF16746,PF01412	PTHR23180,PTHR23180:SF244	KOG0521		K12489	GO:0005096	AT1G10870.1	AGD4	ARF-GAP domain 4	K1
90	VIT_201s0010g01710	2.30741	3.37449	2.43828	4.26013	8.76746	2.34699	1.46855	8.18945	38028584	VIT_201s0010g01710.1	VIT_201s0010g01710.1	PF13855,PF00069	PTHR27000,PTHR27000:SF204	KOG1187	2.7.11.1		GO:0005515,GO:0006468,GO:0005524,GO:0004672	AT2G02220.1	ATPSKR1,PSKR1	phytosulfokin receptor 1	K1
91	VIT_201s0010g02160	12.0604	15.157	9.49556	13.1728	11.0564	12.319	7.73887	13.5693	38028233	VIT_201s0010g02160.1	VIT_201s0010g02160.1	PF00615	PTHR10845,PTHR10845:SF44					AT3G26090.1	ATRGS1,RGS1	G-protein coupled receptors;GTPase activators	K1
92	VIT_201s0010g02730	1.46232	1.22788	2.63676	1.08533	2.31951	1.56905	1.26913	2.45788	38028726	VIT_201s0010g02730.1	VIT_201s0010g02730.1	PF14363,PF00004	PTHR23070,PTHR23070:SF12				GO:0005524	AT3G50930.1	BCS1	cytochrome BC1 synthesis	K1
93	VIT_201s0010g03590	0.490096	0.518941	0.253074	0	1.59657	0.381776	0.844532	2.00352	38028651	VIT_201s0010g03590.1	VIT_201s0010g03590.1	PF02301						AT1G67370.1	ASY1,ATASY1	DNA-binding HORMA family protein	K1
94	VIT_201s0010g03880	25.2299	27.7844	35.0047	26.3472	101.917	26.5161	27.7804	126.273	38029377	VIT_201s0010g03880.1	VIT_201s0010g03880.1		PTHR34781,PTHR34781:SF2					AT1G27290.2			K1
95	VIT_201s0010g03930	41.6929	96.3413	46.1899	43.0322	211.59	87.5183	40.6695	249.834	38026596	VIT_201s0010g03930.1	VIT_201s0010g03930.1	PF03106	PTHR31221,PTHR31221:SF25				GO:0043565,GO:0006355,GO:0003700	AT5G13080.1	ATWRKY75,WRKY75	WRKY DNA-binding protein 75	K1
96	VIT_201s0011g00050	12.8606	10.6848	11.3605	11.5525	9.97761	11.0773	13.1763	16.5438	38027791	VIT_201s0011g00050.1	VIT_201s0011g00050.1		PTHR36335,PTHR36335:SF1					AT1G69060.1		Chaperone DnaJ-domain superfamily protein	K1
97	VIT_201s0011g00390	7.92616	9.12876	9.02966	7.31338	8.8253	7.43905	7.7588	9.06434	38027136	VIT_201s0011g00390.1	VIT_201s0011g00390.1	PF13537,PF00733	PTHR11772,PTHR11772:SF3	KOG0573			GO:0006529,GO:0004066	AT2G03667.1		Asparagine synthase family protein	K1
98	VIT_201s0011g00400	9.35621	11.9334	8.17074	3.17842	22.5578	9.4876	4.02645	20.6118	38028850	VIT_201s0011g00400.1	VIT_201s0011g00400.1	PF00076	PTHR10693,PTHR10693:SF27	KOG0121	3.6.4.13,3.6.4.12		GO:0003676	AT3G25150.2		Nuclear transport factor 2 (NTF2) family protein with RNA binding (RRM-RBD-RNP motifs) domain	K1
99	VIT_201s0011g00420	37.1193	71.7199	33.0663	18.0736	62.8729	52.7664	56.7673	72.7955	38028974	VIT_201s0011g00420.1	VIT_201s0011g00420.1	PF08263,PF13855,PF00069	PTHR27000,PTHR27000:SF205	KOG1187	2.7.11.1		GO:0005515,GO:0006468,GO:0005524,GO:0004672	AT3G02130.1	RPK2,TOAD2	receptor-like protein kinase 2	K1
100	VIT_201s0011g00640	41.5421	34.9622	19.4572	20.1672	46.9758	32.0809	27.7034	50.8451	38027865	VIT_201s0011g00640.1	VIT_201s0011g00640.1	PF00560,PF13855	PTHR27000,PTHR27000:SF120	KOG4579	2.7.11.1		GO:0005515	AT5G61240.1		Leucine-rich repeat (LRR) family protein	K1
101	VIT_201s0011g00680	34.663	45.5424	27.3372	31.9034	35.7806	40.3507	31.8323	51.271	38028830	VIT_201s0011g00680.1	VIT_201s0011g00680.1	PF01090	PTHR11710	KOG3411		K02966	GO:0006412,GO:0005840,GO:0003735	AT3G02080.1		Ribosomal protein S19e family protein	K1
102	VIT_201s0011g01290	19.9385	13.6633	22.3129	18.3434	38.9152	15.7644	12.687	37.13	38027265	VIT_201s0011g01290.1	VIT_201s0011g01290.1	PF07687,PF01546	PTHR32494,PTHR32494:SF7		3.5.3.9	K02083	GO:0016787,GO:0008152	AT4G20070.1	AAH,ATAAH	allantoate amidohydrolase	K1
103	VIT_201s0011g01360	19.6438	16.964	9.60757	10.9155	113.637	18.329	11.8973	147.691	38029019	VIT_201s0011g01360.1	VIT_201s0011g01360.1	PF12710,PF00403,PF00122	PTHR24093,PTHR24093:SF360		3.6.3.54	K17686	GO:0046872,GO:0030001,GO:0000166	AT5G44790.1	HMA7,RAN1	copper-exporting ATPase / responsive-to-antagonist 1 / copper-transporting ATPase (RAN1)	K1
104	VIT_201s0011g01810	4.21873	28.6968	4.84346	2.31072	21.3557	13.5962	6.42571	24.6891	38026577	VIT_201s0011g01810.1	VIT_201s0011g01810.1		PTHR35584								K1
105	VIT_201s0011g01930	9.12223	6.71745	6.26839	5.83074	6.43351	6.77716	8.83285	8.96945	38028473	VIT_201s0011g01930.1	VIT_201s0011g01930.1	PF04488,PF04572	PTHR12042,PTHR12042:SF13	KOG1928				AT4G19900.1		alpha 1,4-glycosyltransferase family protein	K1
106	VIT_201s0011g02060	5.57967	2.9712	4.02939	3.47318	4.66339	4.94149	6.82003	6.38084	38028377	VIT_201s0011g02060.1	VIT_201s0011g02060.1	PF00067	PTHR24296,PTHR24296:SF3	KOG0157	1.14.15.3	K15402	GO:0055114,GO:0020037,GO:0016705,GO:0005506	AT5G23190.1	CYP86B1	cytochrome P450, family 86, subfamily B, polypeptide 1	K1
107	VIT_201s0011g02080	3.85143	9.9876	10.7044	8.31383	13.1902	4.86647	3.05005	17.2276	38028252	VIT_201s0011g02080.1	VIT_201s0011g02080.1		PTHR10369,PTHR10369:SF3				GO:0006412,GO:0005840,GO:0005622,GO:0003735	AT5G08240.1			K1
108	VIT_201s0011g02130	6.24789	8.43449	6.21818	5.92065	9.43885	5.13393	4.98979	9.11987	38026474	VIT_201s0011g02130.1	VIT_201s0011g02130.1	PF01476	PTHR20932,PTHR20932:SF8					AT5G23130.1		Peptidoglycan-binding LysM domain-containing protein	K1
109	VIT_201s0011g02160	5.1575	5.56546	5.92517	5.78115	6.57532	5.41579	6.40336	8.69591	38028635	VIT_201s0011g02160.1	VIT_201s0011g02160.1	PF13920	PTHR15600,PTHR15600:SF28	KOG4172		K17592		AT5G23110.1		Zinc finger, C3HC4 type (RING finger) family protein	K1
110	VIT_201s0011g02220	16.3034	15.961	16.8622	19.8924	19.8804	16.02	18.8652	21.9166	38029310	VIT_201s0011g02220.1	VIT_201s0011g02220.1	PF00004	PTHR23074,PTHR23074:SF95		3.6.1.3		GO:0005524	AT3G19740.1		P-loop containing nucleoside triphosphate hydrolases superfamily protein	K1
111	VIT_201s0011g02230	4.59699	4.99678	4.13218	5.33703	6.38856	5.12386	5.70282	9.0366	38028917	VIT_201s0011g02230.1	VIT_201s0011g02230.1	PF01040	PTHR11048,PTHR11048:SF28	KOG1381	2.5.1.39	K06125	GO:0016021,GO:0004659	AT4G23660.1	AtPPT1,PPT1	polyprenyltransferase 1	K1
112	VIT_201s0011g02270	10.1607	11.5334	12.4254	11.8515	10.5931	11.5995	13.7608	14.8612	38027940	VIT_201s0011g02270.1	VIT_201s0011g02270.1	PF00069	PTHR24361,PTHR24361:SF326	KOG0198	2.7.11.1		GO:0006468,GO:0005524,GO:0004672	AT3G13530.1	MAP3KE1,MAPKKK7	mitogen-activated protein kinase kinase kinase 7	K1
113	VIT_201s0011g02340	6.46052	6.79912	8.66576	6.87147	5.4816	5.9026	7.53095	6.62944	38029591	VIT_201s0011g02340.1	VIT_201s0011g02340.1	PF03810	PTHR10997,PTHR10997:SF9				GO:0008536,GO:0006886	AT1G26170.1		ARM repeat superfamily protein	K1
114	VIT_201s0011g02360	8.79032	19.3172	2.21457	0	51.1614	35.7919	6.88406	79.5235	38029055	VIT_201s0011g02360.1	VIT_201s0011g02360.1	PF13639	PTHR14155,PTHR14155:SF110				GO:0008270,GO:0005515	AT2G01150.1	RHA2B	RING-H2 finger protein 2B	K1
115	VIT_201s0011g02480	19.0178	67.9673	15.4778	11.649	86.2196	38.4361	39.4121	96.1942	38028191	VIT_201s0011g02480.1	VIT_201s0011g02480.1	PF00122,PF12710,PF16209,PF16212	PTHR24092,PTHR24092:SF41		3.6.3.1		GO:0046872,GO:0000166,GO:0016021,GO:0015914,GO:0005524,GO:0004012,GO:0000287	AT1G68710.1		ATPase E1-E2 type family protein / haloacid dehalogenase-like hydrolase family protein	K1
116	VIT_201s0011g02810	28.5815	34.3559	33.5511	33.7499	29.8193	28.2435	32.1088	44.6171	38028370	VIT_201s0011g02810.1	VIT_201s0011g02810.1		PTHR31908,PTHR31908:SF4					AT1G67230.1	LINC1	little nuclei1	K1
117	VIT_201s0011g02970	12.941	12.9652	12.2315	12.0176	15.3284	12.0435	13.4078	24.7711	38027306	VIT_201s0011g02970.1	VIT_201s0011g02970.1	PF07842	PTHR12214,PTHR12214:SF0			K13211	GO:0006355,GO:0005634,GO:0003677,GO:0003700	AT5G08550.1	ILP1	GC-rich sequence DNA-binding factor-like protein	K1
118	VIT_201s0011g02980	12.4857	9.02657	8.2861	10.4664	14.2454	8.20596	8.27905	19.294	38028115	VIT_201s0011g02980.1	VIT_201s0011g02980.1	PF15458	PTHR12214,PTHR12214:SF0				GO:0071008,GO:0000390,GO:0006355,GO:0005634,GO:0003700,GO:0003677	AT5G08550.1	ILP1	GC-rich sequence DNA-binding factor-like protein	K1
119	VIT_201s0011g03090	21.812	2.02683	0	0.19709	539.471	11.3954	2.93222	248.239	38027623	VIT_201s0011g03090.1	VIT_201s0011g03090.1	PF06351	PTHR31843,PTHR31843:SF1		5.3.99.6	K10525	GO:0016853,GO:0009507	AT3G25780.1	AOC3	allene oxide cyclase 3	K1
120	VIT_201s0011g03370	66.3652	75.3387	34.6457	32.7425	150.157	76.0826	85.586	165.217	38027759	VIT_201s0011g03370.1	VIT_201s0011g03370.1	PF01426,PF05641	PTHR31917,PTHR31917:SF9		2.1.1.37		GO:0003682	AT1G68580.2		agenet domain-containing protein / bromo-adjacent homology (BAH) domain-containing protein	K1
121	VIT_201s0011g03500	13.2893	5.83675	2.01781	1.30229	15.2062	10.3969	12.576	19.2179	38026795	VIT_201s0011g03500.1	VIT_201s0011g03500.1	PF02574	PTHR21091,PTHR21091:SF114	KOG1579	2.1.1.10	K00547		AT3G25900.1	ATHMT-1,HMT-1	Homocysteine S-methyltransferase family protein	K1
122	VIT_201s0011g03620	5.09335	6.17126	4.41319	4.00298	5.31701	5.5661	5.39577	6.81482	38027540	VIT_201s0011g03620.1	VIT_201s0011g03620.1	PF12695	PTHR11614,PTHR11614:SF94		2.3.1.22			AT1G77420.1		alpha/beta-Hydrolases superfamily protein	K1
123	VIT_201s0011g03800	0.077117	1.41288	0.156735	0.0575787	1.43131	0.224603	0	1.83146	38028219	VIT_201s0011g03800.1	VIT_201s0011g03800.1	PF13947,PF14380	PTHR33138				GO:0030247	AT1G66940.1		protein kinase-related	K1
124	VIT_201s0011g03850	25.3527	43.2218	9.97675	4.3303	61.2231	34.7163	34.9995	83.1929	38027076	VIT_201s0011g03850.1	VIT_201s0011g03850.1	PF02485	PTHR31042,PTHR31042:SF7				GO:0016020,GO:0008375	AT1G68390.1		Core-2/I-branching beta-1,6-N-acetylglucosaminyltransferase family protein	K1
125	VIT_201s0011g04090	16.1601	17.1414	21.3986	18.867	35.5412	15.1199	18.0286	38.6983	38026582	VIT_201s0011g04090.1	VIT_201s0011g04090.1	PF12695	PTHR11005,PTHR11005:SF2					AT1G15060.1		Uncharacterised conserved protein UCP031088, alpha/beta hydrolase	K1
126	VIT_201s0011g04200	19.9749	43.9947	22.8474	13.8021	153.821	18.3872	9.84991	154.562	38026713	VIT_201s0011g04200.1	VIT_201s0011g04200.1	PF00324	PTHR11785,PTHR11785:SF367				GO:0055085,GO:0016020,GO:0006810,GO:0015171,GO:0003333	AT2G01170.1	BAT1	bidirectional amino acid transporter 1	K1
127	VIT_201s0011g04510	104.528	40.9978	30.789	36.3968	264.555	97.3937	78.2606	172.664	38027371	VIT_201s0011g04510.1	VIT_201s0011g04510.1							AT2G01100.2			K1
128	VIT_201s0011g04520	50.6797	52.6489	45.5379	49.8515	80.7512	48.1077	54.2585	78.6203	38027708	VIT_201s0011g04520.1	VIT_201s0011g04520.1	PF13949,PF03097	PTHR23030,PTHR23030:SF13			K12200	GO:0005515	AT1G15130.1		Endosomal targeting BRO1-like domain-containing protein	K1
129	VIT_201s0011g04870	6.06811	9.07136	10.9923	6.57338	12.5341	7.54643	7.47131	19.5797	38027229	VIT_201s0011g04870.1	VIT_201s0011g04870.1	PF02183,PF00046	PTHR24326,PTHR24326:SF114	KOG0483		K09338	GO:0043565,GO:0006355,GO:0003700,GO:0003677	AT2G01430.1	ATHB-17,ATHB17,HB17	homeobox-leucine zipper protein 17	K1
130	VIT_201s0011g05020	2.62916	0.252533	0	0.074367	5.50996	2.12732	2.39161	4.90062	38026914	VIT_201s0011g05020.1	VIT_201s0011g05020.1	PF00046	PTHR24326,PTHR24326:SF224				GO:0003677	AT3G18010.1	WOX1	WUSCHEL related homeobox 1	K1
131	VIT_201s0011g05240	4.28605	3.24496	9.11703	0	101.879	15.6591	10.4646	109.105	38026497	VIT_201s0011g05240.1	VIT_201s0011g05240.1							AT1G23149.1	CPuORF29	conserved peptide upstream open reading frame 29	K1
132	VIT_201s0011g05250	113.496	98.0034	85.1696	52.0313	868.82	122.039	100.5	792.133	38026534	VIT_201s0011g05250.1	VIT_201s0011g05250.1		PTHR33270,PTHR33270:SF5					AT1G70780.1			K1
133	VIT_201s0011g05520	10.1199	11.8136	9.80058	11.6211	13.0355	11.1913	10.6844	14.4064	38026899	VIT_201s0011g05520.1	VIT_201s0011g05520.1		PTHR12691,PTHR12691:SF10					AT1G23230.1			K1
134	VIT_201s0011g05570	57.5264	58.0033	29.3438	25.1727	112.907	78.8929	89.9912	132.638	38026544	VIT_201s0011g05570.1	VIT_201s0011g05570.1	PF09409	PTHR23153,PTHR23153:SF39	KOG2699				AT2G01650.1	PUX2	plant UBX domain-containing protein 2	K1
135	VIT_201s0011g05680	48.5368	112.188	21.4527	19.9052	539.037	69.8887	12.9916	316.538	38027099	VIT_201s0011g05680.1	VIT_201s0011g05680.1		PTHR34780,PTHR34780:SF2					AT1G67920.1			K1
136	VIT_201s0011g05690	21.2061	20.8421	26.2681	22.2834	22.6299	18.769	23.1302	26.1141	38026889	VIT_201s0011g05690.1	VIT_201s0011g05690.1	PF00856,PF09273	PTHR13271,PTHR13271:SF25	KOG1337	2.1.1.43		GO:0005515	AT1G24610.1		Rubisco methyltransferase family protein	K1
137	VIT_201s0011g05970	43.5199	8.79004	6.52374	7.90472	50.1608	20.3034	17.8277	103.628	38027852	VIT_201s0011g05970.1	VIT_201s0011g05970.1	PF00447	PTHR10015,PTHR10015:SF156	KOG0627		K09419	GO:0043565,GO:0006355,GO:0005634,GO:0003700	AT1G67970.1	AT-HSFA8,HSFA8	heat shock transcription factor A8	K1
138	VIT_201s0011g06090	20.8417	21.3346	20.4617	24.1231	30.8825	22.5227	25.7812	31.7824	38026968	VIT_201s0011g06090.1	VIT_201s0011g06090.1	PF11732,PF11262	PTHR21597			K12879		AT1G24706.1	AtTHO2,THO2	THO2	K1
139	VIT_201s0011g06120	11.4522	7.7435	7.56168	9.71086	14.8176	10.0829	10.4961	17.1774	38028288	VIT_201s0011g06120.1	VIT_201s0011g06120.1	PF11732,PF16134	PTHR21597,PTHR21597:SF0					AT1G24706.2	AtTHO2,THO2	THO2	K1
140	VIT_201s0011g06360	1.33624	0.214381	0	0	1.09362	0.815522	0.838674	2.08304	38027169	VIT_201s0011g06360.1	VIT_201s0011g06360.1	PF04770	PTHR31948,PTHR31948:SF7					AT1G75240.1	AtHB33,HB33	homeobox protein 33	K1
141	VIT_201s0011g06600	2.90023	2.24509	1.07961	0.736033	39.6273	2.21312	1.30229	22.5553	38029431	VIT_201s0011g06600.1	VIT_201s0011g06600.1	PF00282	PTHR11999,PTHR11999:SF92		4.1.1.15	K01580	GO:0030170,GO:0019752,GO:0016831	AT5G17330.1	GAD,GAD1	glutamate decarboxylase	K1
142	VIT_201s0026g00280	30.741	38.4029	8.09548	8.60164	98.8895	51.0141	68.4574	164.345	38028316	VIT_201s0026g00280.1	VIT_201s0026g00280.1	PF02358,PF00982	PTHR10788,PTHR10788:SF14		2.4.1.15,3.1.3.12	K16055	GO:0005992,GO:0003824	AT1G60140.1	ATTPS10,TPS10	trehalose phosphate synthase	K1
143	VIT_201s0026g00760	14.1614	14.1085	15.482	14.111	21.7407	14.2233	16.9912	21.5093	38027338	VIT_201s0026g00760.1	VIT_201s0026g00760.1	PF15912	PTHR23185,PTHR23185:SF0					AT3G05680.1	EMB2016	embryo defective 2016	K1
144	VIT_201s0026g00820	22.1469	14.893	8.30865	7.27927	127.272	33.3264	18.9407	136.15	38027775	VIT_201s0026g00820.1	VIT_201s0026g00820.1	PF07687,PF01546	PTHR11014,PTHR11014:SF85	KOG2275		K14664	GO:0016787,GO:0008152	AT1G51760.1	IAR3,JR3	peptidase M20/M25/M40 family protein	K1
145	VIT_201s0026g00910	21.175	14.4704	9.17455	2.93487	61.4165	32.6276	13.4249	49.5462	38027713	VIT_201s0026g00910.1	VIT_201s0026g00910.1		PTHR33386,PTHR33386:SF4					AT3G48180.1			K1
146	VIT_201s0026g01010	38.2688	35.9343	38.9767	44.7353	35.7762	38.5901	44.9958	55.669	38027080	VIT_201s0026g01010.1	VIT_201s0026g01010.1	PF08295,PF02671,PF16879	PTHR12346,PTHR12346:SF8	KOG4204		K11644	GO:0006355	AT1G70060.1	SNL4	SIN3-like 4	K1
147	VIT_201s0026g01960	33.3169	43.0823	27.2783	25.4583	59.3572	31.2545	30.396	92.111	38027962	VIT_201s0026g01960.1	VIT_201s0026g01960.1	PF07690	PTHR19432,PTHR19432:SF27	KOG0637		K15378	GO:0055085,GO:0016021,GO:0015770,GO:0008515,GO:0005887	AT2G02860.1	ATSUC3,ATSUT2,SUC3,SUT2	sucrose transporter 2	K1
148	VIT_201s0026g02080	95.2479	65.9666	22.7031	23.5116	480.536	134.219	109.282	533.72	38027582	VIT_201s0026g02080.1	VIT_201s0026g02080.1	PF01344	PTHR24413,PTHR24413:SF138				GO:0005515	AT2G02870.3		Galactose oxidase/kelch repeat superfamily protein	K1
149	VIT_201s0026g02340	11.6363	9.07201	5.54101	4.28511	10.9937	8.58236	5.7978	18.6331	38027212	VIT_201s0026g02340.1	VIT_201s0026g02340.1	PF03141	PTHR10108,PTHR10108:SF776		2.1.1.157		GO:0008168	AT1G26850.1		S-adenosyl-L-methionine-dependent methyltransferases superfamily protein	K1
150	VIT_201s0026g02720	22.3183	19.5437	18.3462	20.8211	21.808	19.2551	20.7584	25.9563	38027426	VIT_201s0026g02720.1	VIT_201s0026g02720.1	PF14443	PTHR14304,PTHR14304:SF11	KOG4246			GO:0006355	AT2G03150.1	emb1579	ATP/GTP-binding protein family	K1
151	VIT_201s0127g00700	580.936	264.624	46.0408	19.7516	1452.06	685.527	878.982	1220.8	38028899	VIT_201s0127g00700.1	VIT_201s0127g00700.1	PF07816	PTHR33095,PTHR33095:SF3					AT1G23710.1		Protein of unknown function (DUF1645)	K1
152	VIT_201s0137g00460	52.905	41.2282	40.2164	42.4599	187.355	39.7876	31.3052	214.548	38029533	VIT_201s0137g00460.1	VIT_201s0137g00460.1	PF13920,PF07002	PTHR10857,PTHR10857:SF34	KOG4172		K16280		AT5G14420.2	RGLG2	RING domain ligase2	K1
153	VIT_201s0146g00020	27.7643	37.029	31.5199	20.2561	80.9655	32.3415	34.9273	103.788	38027228	VIT_201s0146g00020.1	VIT_201s0146g00020.1		PTHR36068,PTHR36068:SF1					AT5G13100.1			K1
154	VIT_201s0146g00360	2.31166	0.292627	0.842695	1.7043	4.24745	1.94256	1.39968	6.61842	38028117	VIT_201s0146g00360.1	VIT_201s0146g00360.1	PF00643,PF06203	PTHR31717,PTHR31717:SF3				GO:0008270,GO:0005622,GO:0005515	AT2G33500.1		B-box type zinc finger protein with CCT domain	K1
155	VIT_201s0146g00440	1.874	3.05866	3.19892	2.43093	16.4681	2.79965	4.32275	9.35226	38027525	VIT_201s0146g00440.1	VIT_201s0146g00440.1	PF11443	PTHR31373,PTHR31373:SF0					AT5G13210.1		Uncharacterised conserved protein UCP015417, vWA	K1
156	VIT_202s0012g00240	5.42383	4.95251	6.78468	7.36016	8.81715	7.75272	7.43729	10.8028	38046856	VIT_202s0012g00240.1	VIT_202s0012g00240.1	PF06101	PTHR16166,PTHR16166:SF105					AT4G17140.3		pleckstrin homology (PH) domain-containing protein	K1
157	VIT_202s0012g00310	69.7995	66.2259	68.4552	68.8817	90.8206	59.435	73.6079	118.122	38045707	VIT_202s0012g00310.1	VIT_202s0012g00310.1	PF00004,PF02190,PF05362	PTHR10046,PTHR10046:SF24		3.4.21.53	K01338	GO:0005524,GO:0006508,GO:0004176,GO:0004252,GO:0030163	AT5G47040.1	LON2	lon protease 2	K1
158	VIT_202s0012g00320	1.8129	0	0.0866827	0	2.52256	1.16295	1.25856	4.82639	38045554	VIT_202s0012g00320.1	VIT_202s0012g00320.1	PF14226,PF03171	PTHR10209,PTHR10209:SF168	KOG0143	4.2.1.78		GO:0055114,GO:0016491	AT1G17020.1	ATSRG1,SRG1	senescence-related gene 1	K1
159	VIT_202s0012g00400	9.39836	6.21397	1.66094	4.2596	68.8772	22.1833	4.62555	113.793	38045524	VIT_202s0012g00400.1	VIT_202s0012g00400.1	PF14226,PF03171	PTHR10209,PTHR10209:SF168	KOG0143	4.2.1.78		GO:0055114,GO:0016491	AT1G17020.1	ATSRG1,SRG1	senescence-related gene 1	K1
160	VIT_202s0012g00540	10.1877	20.1706	5.61728	4.10128	24.9064	20.7645	22.9958	28.9011	38046061	VIT_202s0012g00540.1	VIT_202s0012g00540.1	PF00141	PTHR31388,PTHR31388:SF47		1.11.1.7	K00430	GO:0055114,GO:0020037,GO:0006979,GO:0004601	AT2G35380.1		Peroxidase superfamily protein	K1
161	VIT_202s0012g00840	5.49512	4.16845	2.31956	1.73028	5.82487	4.319	5.13557	7.76593	38046541	VIT_202s0012g00840.1	VIT_202s0012g00840.1	PF13041,PF01535	PTHR24015,PTHR24015:SF701					AT3G29230.1		Tetratricopeptide repeat (TPR)-like superfamily protein	K1
162	VIT_202s0012g01300	8.43935	8.11873	9.34176	6.10634	8.35938	6.63112	3.54231	13.2039	38046169	VIT_202s0012g01300.1	VIT_202s0012g01300.1										K1
163	VIT_202s0012g01330	70.6321	65.2346	66.7485	68.4048	112.138	64.5898	60.3196	114.31	38045196	VIT_202s0012g01330.1	VIT_202s0012g01330.1	PF01412	PTHR23180,PTHR23180:SF275	KOG0706		K12493	GO:0005096	AT4G17890.1	AGD8	ARF-GAP domain 8	K1
164	VIT_202s0012g01450	0.398069	0.052464	0.803742	0.325443	1.0498	0.0327127	0.210323	1.10513	38046908	VIT_202s0012g01450.1	VIT_202s0012g01450.1	PF00010	PTHR11969,PTHR11969:SF22				GO:0046983	AT5G46690.1	bHLH071	beta HLH protein 71	K1
165	VIT_202s0012g01540	1.06499	3.25543	0.169769	0	3.56617	2.75311	1.42425	4.12549	38044871	VIT_202s0012g01540.1	VIT_202s0012g01540.1							AT4G17920.1		RING/U-box superfamily protein	K1
166	VIT_202s0012g01640	19.0764	12.3825	8.2279	7.23424	173.889	18.2638	12.7507	101.501	38044907	VIT_202s0012g01640.1	VIT_202s0012g01640.1	PF05770	PTHR14217,PTHR14217:SF5		2.7.1.158,2.7.1.134,2.7.1.159	K00913	GO:0052726,GO:0052725,GO:0047325,GO:0032957,GO:0005622,GO:0005524,GO:0000287	AT5G16760.1		Inositol 1,3,4-trisphosphate 5/6-kinase family protein	K1
167	VIT_202s0012g01960	13.6208	36.5318	3.78542	2.60602	123.853	15.7693	12.9219	144.511	38045813	VIT_202s0012g01960.1	VIT_202s0012g01960.1	PF02928,PF02375,PF02373	PTHR10694,PTHR10694:SF33		1.14.11.27			AT5G46910.1		Transcription factor jumonji (jmj) family protein / zinc finger (C5HC2 type) family protein	K1
168	VIT_202s0025g00470	23.7204	14.9846	17.3162	22.6835	45.0638	22.0331	23.9377	36.694	38045732	VIT_202s0025g00470.1	VIT_202s0025g00470.1	PF02891	PTHR10782,PTHR10782:SF4			K04706	GO:0008270,GO:0019789	AT5G41580.1		RING/U-box superfamily protein	K1
169	VIT_202s0025g00510	14.2695	20.6238	12.8929	18.2645	17.9119	21.3643	20.9509	26.2448	38044945	VIT_202s0025g00510.1	VIT_202s0025g00510.1	PF01794,PF08022,PF08414,PF08030	PTHR11972,PTHR11972:SF69		1.6.3.1	K13447	GO:0055114,GO:0016491,GO:0050664,GO:0004601	AT1G64060.1	ATRBOH F,ATRBOHF,RBOH F,RBOHAP108,RBOHF	respiratory burst oxidase protein F	K1
170	VIT_202s0025g01020	7.02661	19.2997	19.9708	12.7725	19.3668	14.4795	14.7084	25.1112	38045624	VIT_202s0025g01020.1	VIT_202s0025g01020.1	PF16596,PF00170,PF07777	PTHR22952,PTHR22952:SF144	KOG3584		K09060	GO:0043565,GO:0006355,GO:0003700	AT2G46270.1	GBF3	G-box binding factor 3	K1
171	VIT_202s0025g01480	8.40974	10.2263	11.4509	11.1824	9.63262	8.8007	8.96367	13.6933	38046673	VIT_202s0025g01480.1	VIT_202s0025g01480.1		PTHR34837,PTHR34837:SF2					AT5G53440.1			K1
172	VIT_202s0025g02150	46.1322	52.2596	39.9407	40.8866	84.914	39.7002	45.4771	71.1682	38046210	VIT_202s0025g02150.1	VIT_202s0025g02150.1	PF00795,PF02540	PTHR23090,PTHR23090:SF9		6.3.5.1	K01950	GO:0016810,GO:0006807	AT1G55090.1		carbon-nitrogen hydrolase family protein	K1
173	VIT_202s0025g02620	0.543008	0	0.177792	0.106763	0.758878	0.376328	0.066174	1.17769	38045241	VIT_202s0025g02620.1	VIT_202s0025g02620.1	PF00561	PTHR10992,PTHR10992:SF881	KOG1454	3.7.1.9			AT4G24140.1		alpha/beta-Hydrolases superfamily protein	K1
174	VIT_202s0025g02660	81.1252	76.6568	81.1623	67.4227	124.326	62.8891	48.4433	175.982	38045247	VIT_202s0025g02660.1	VIT_202s0025g02660.1	PF10192	PTHR21229,PTHR21229:SF22				GO:0019236,GO:0007186,GO:0016021	AT5G42090.1		Lung seven transmembrane receptor family protein	K1
175	VIT_202s0025g02800	33.46	45.8117	24.2775	24.5058	168.75	51.4965	27.5454	127.291	38044877	VIT_202s0025g02800.1	VIT_202s0025g02800.1		PTHR34683,PTHR34683:SF1					AT4G28290.1			K1
176	VIT_202s0025g02920	2.37896	3.25872	2.85221	2.14692	17.2675	4.90153	1.22976	13.5606	38046746	VIT_202s0025g02920.1	VIT_202s0025g02920.1	PF08100,PF00891	PTHR11746,PTHR11746:SF81	KOG3178	2.1.1.68	K13066	GO:0046983,GO:0008171	AT5G54160.1	ATOMT1,OMT1	O-methyltransferase 1	K1
177	VIT_202s0025g02960	10.9371	5.79042	1.31724	0.516461	38.3425	5.37309	8.79895	37.2246	38046537	VIT_202s0025g02960.1	VIT_202s0025g02960.1	PF14226,PF03171	PTHR10209,PTHR10209:SF196	KOG0143	1.14.11.9		GO:0055114,GO:0016491	AT4G10490.1		2-oxoglutarate (2OG) and Fe(II)-dependent oxygenase superfamily protein	K1
178	VIT_202s0025g03100	42.0026	26.6855	34.3795	27.9866	93.4169	59.6169	34.7745	78.0262	38045375	VIT_202s0025g03100.1	VIT_202s0025g03100.1	PF00107,PF08240	PTHR11695,PTHR11695:SF543	KOG0023	1.1.1.183	K00083	GO:0055114,GO:0016491,GO:0008270	AT1G72680.1	ATCAD1,CAD1	cinnamyl-alcohol dehydrogenase	K1
179	VIT_202s0025g03200	0.0804673	0.166076	0	0	0.79088	0.310394	0.228885	0.617771	38046610	VIT_202s0025g03200.1	VIT_202s0025g03200.1	PF03141	PTHR10108,PTHR10108:SF801				GO:0008168	AT1G33170.1		S-adenosyl-L-methionine-dependent methyltransferases superfamily protein	K1
180	VIT_202s0025g03430	18.769	18.2586	18.4567	17.9115	17.0526	15.8266	18.1603	21.3603	38045135	VIT_202s0025g03430.1	VIT_202s0025g03430.1	PF07722,PF00958	PTHR11922,PTHR11922:SF2		6.3.5.2	K01951	GO:0016787,GO:0006541,GO:0006177,GO:0006164,GO:0005524,GO:0003922	AT1G63660.1		GMP synthase (glutamine-hydrolyzing), putative / glutamine amidotransferase, putative	K1
181	VIT_202s0025g03520	115.546	113.407	98.4391	124.076	477.652	136.726	97.9671	307.19	38046571	VIT_202s0025g03520.1	VIT_202s0025g03520.1	PF13419	PTHR18901,PTHR18901:SF4	KOG2914	3.1.3.58			AT4G11570.1		Haloacid dehalogenase-like hydrolase (HAD) superfamily protein	K1
182	VIT_202s0025g03530	53.104	76.8254	80.1601	74.535	72.3091	67.7816	71.6356	107.554	38045634	VIT_202s0025g03530.1	VIT_202s0025g03530.1	PF04107	PTHR34378,PTHR34378:SF1		6.3.2.2	K01919	GO:0042398,GO:0004357	AT4G23100.1	ATECS1,CAD2,GSH1,GSHA,PAD2,RML1	glutamate-cysteine ligase	K1
183	VIT_202s0025g03540	10.4532	4.11515	7.03906	5.31941	7.67562	3.57589	6.07772	10.6063	38046683	VIT_202s0025g03540.1	VIT_202s0025g03540.1	PF03953,PF00091	PTHR11588,PTHR11588:SF124		2.4.2.1	K07375	GO:0003924,GO:0007017,GO:0005874	AT5G12250.1	TUB6	beta-6 tubulin	K1
184	VIT_202s0025g03560	20.0539	18.1136	17.8855	21.6125	28.3456	19.466	23.1857	31.0688	38045736	VIT_202s0025g03560.1	VIT_202s0025g03560.1	PF01388,PF02928,PF02375,PF00628,PF02373,PF08429	PTHR10694,PTHR10694:SF8			K11446	GO:0003677,GO:0005515,GO:0055114,GO:0016706	AT1G63490.1		transcription factor jumonji (jmjC) domain-containing protein	K1
185	VIT_202s0025g04080	0.299928	0	0.143392	0.16783	0.968491	0.155043	0.414106	1.04518	38045525	VIT_202s0025g04080.1	VIT_202s0025g04080.1	PF00067	PTHR24286,PTHR24286:SF11	KOG0157			GO:0055114,GO:0020037,GO:0016705,GO:0005506	AT1G12740.2	CYP87A2	cytochrome P450, family 87, subfamily A, polypeptide 2	K1
186	VIT_202s0025g04110	1.97341	1.71916	1.92139	1.71427	2.98376	1.97801	1.33699	3.70856	38046866	VIT_202s0025g04110.1	VIT_202s0025g04110.1	PF00989,PF07714	PTHR23257,PTHR23257:SF434		2.7.11.1		GO:0006355,GO:0006468,GO:0004672	AT4G23050.1		PAS domain-containing protein tyrosine kinase family protein	K1
187	VIT_202s0025g04150	42.0419	46.4137	49.1601	43.3177	50.1476	36.7703	37.5859	55.4435	38046844	VIT_202s0025g04150.1	VIT_202s0025g04150.1	PF13639	PTHR14155,PTHR14155:SF186				GO:0008270,GO:0005515	AT4G11680.1		Zinc finger, C3HC4 type (RING finger) family protein	K1
188	VIT_202s0025g04160	4.84996	5.14292	6.87427	5.42384	5.70688	4.73522	4.92409	5.95499	38045095	VIT_202s0025g04160.1	VIT_202s0025g04160.1	PF05664	PTHR31280,PTHR31280:SF3					AT4G11670.1		Protein of unknown function (DUF810)	K1
189	VIT_202s0025g04360	0.457453	0.476702	0.033205	0.281336	0.727336	0.940615	0.285318	0.825054	38046413	VIT_202s0025g04360.1	VIT_202s0025g04360.1	PF00067	PTHR24298,PTHR24298:SF55	KOG0156			GO:0055114,GO:0020037,GO:0016705,GO:0005506	AT1G33720.1	CYP76C6	cytochrome P450, family 76, subfamily C, polypeptide 6	K1
190	VIT_202s0025g04420	24.5413	47.4315	2.31635	0.706552	574.437	28.8162	26.4909	612.339	38045795	VIT_202s0025g04420.1	VIT_202s0025g04420.1	PF01554	PTHR11206,PTHR11206:SF127	KOG1347		K03327	GO:0055085,GO:0016020,GO:0015297,GO:0015238,GO:0006855	AT4G23030.1		MATE efflux family protein	K1
191	VIT_202s0025g04500	15.9422	16.8302	19.4251	13.4633	16.0115	18.9562	18.8888	22.3006	38046910	VIT_202s0025g04500.1	VIT_202s0025g04500.1	PF00638	PTHR23138,PTHR23138:SF97	KOG2724		K14295	GO:0046907	AT4G11790.1		Pleckstrin homology (PH) domain superfamily protein	K1
192	VIT_202s0025g04780	0.713419	0.524443	1.08783	0.897211	1.68572	0.643274	1.33559	1.50843	38046222	VIT_202s0025g04780.1	VIT_202s0025g04780.1	PF02225,PF00082	PTHR10795,PTHR10795:SF374		3.4.21.25		GO:0006508,GO:0004252	AT1G04110.1	SDD1	Subtilase family protein	K1
193	VIT_202s0025g04990	20.4522	25.6187	20.6872	19.1181	18.2476	16.2503	17.0507	25.0877	38044988	VIT_202s0025g04990.1	VIT_202s0025g04990.1	PF09335	PTHR12677,PTHR12677:SF27					AT4G22850.1		SNARE associated Golgi protein family	K1
194	VIT_202s0025g05120	24.019	52.8259	17.5354	12.8341	95.9789	37.9266	44.1738	150.302	38045455	VIT_202s0025g05120.1	VIT_202s0025g05120.1	PF13740,PF01842	PTHR31096,PTHR31096:SF6		2.7.7.59		GO:0016597,GO:0008152	AT1G12420.1	ACR8	ACT domain repeat 8	K1
195	VIT_202s0033g00130	35.5925	24.6761	14.9715	13.7615	57.3482	30.5356	28.0842	92.5388	38046039	VIT_202s0033g00130.1	VIT_202s0033g00130.1	PF00201	PTHR11926,PTHR11926:SF366				GO:0016758,GO:0008152	AT2G36780.1		UDP-Glycosyltransferase superfamily protein	K1
196	VIT_202s0033g00180	28.9474	21.0596	18.1842	19.7809	56.7804	28.0194	21.147	64.7868	38045413	VIT_202s0033g00180.1	VIT_202s0033g00180.1	PF00201	PTHR11926,PTHR11926:SF366				GO:0016758,GO:0008152	AT5G03490.1		UDP-Glycosyltransferase superfamily protein	K1
197	VIT_202s0033g00670	0.466875	1.06987	1.10752	1.32311	2.76649	0.887634	0.294052	2.98577	38046300	VIT_202s0033g00670.1	VIT_202s0033g00670.1	PF00795	PTHR23088,PTHR23088:SF31	KOG0805	3.5.5.4,4.2.1.65	K13035	GO:0016810,GO:0006807	AT5G22300.1	AtNIT4,NIT4	nitrilase 4	K1
198	VIT_202s0033g01050	288.093	128.102	74.8111	69.2376	436.005	306.836	223.936	360.15	38045804	VIT_202s0033g01050.1	VIT_202s0033g01050.1	PF02458	PTHR31642,PTHR31642:SF36		2.3.1.232,2.3.1.196		GO:0016747	AT5G17540.1		HXXXD-type acyl-transferase family protein	K1
199	VIT_202s0033g01060	59.3066	37.3167	29.1048	20.59	450.279	92.113	68.5889	359.351	38046818	VIT_202s0033g01060.1	VIT_202s0033g01060.1	PF02458	PTHR31642,PTHR31642:SF36		2.3.1.232,2.3.1.196		GO:0016747	AT5G17540.1		HXXXD-type acyl-transferase family protein	K1
200	VIT_202s0033g01360	8.65473	6.34595	7.23864	8.87957	8.23257	8.53866	9.79659	8.99473	38046100	VIT_202s0033g01360.1	VIT_202s0033g01360.1	PF10409,PF02181	PTHR23213,PTHR23213:SF190					AT1G31810.1	AFH14	Formin Homology 14	K1
201	VIT_202s0033g01375	2.29623	4.89432	1.59057	2.07386	7.58429	2.83698	2.66447	7.30749	38045547	VIT_202s0033g01375.1	VIT_202s0033g01375.1	PF13041	PTHR24015,PTHR24015:SF547					AT1G12700.1		ATP binding;nucleic acid binding;helicases	K1
202	VIT_202s0033g01380	126.894	316.061	58.8032	39.7357	577.371	155.051	84.8477	390.186	38046255	VIT_202s0033g01380.1	VIT_202s0033g01380.1	PF01786	PTHR31803,PTHR31803:SF7		1.10.3.11	K17893	GO:0055114,GO:0009916	AT1G32350.1	AOX1D	alternative oxidase 1D	K1
203	VIT_202s0087g00390	13.7011	11.2725	9.91016	11.9649	11.9786	13.056	14.1475	19.2271	38045418	VIT_202s0087g00390.1	VIT_202s0087g00390.1	PF03372	PTHR12121,PTHR12121:SF42	KOG0620	3.1.13.4	K12603		AT1G31500.1		DNAse I-like superfamily protein	K1
204	VIT_202s0087g00760	2.1245	0.619819	0.702467	0.912671	2.11146	1.28338	0.979709	4.33943	38045227	VIT_202s0087g00760.1	VIT_202s0087g00760.1	PF13041,PF01535	PTHR24015,PTHR24015:SF402					AT4G19220.1		Tetratricopeptide repeat (TPR)-like superfamily protein	K1
205	VIT_202s0154g00170	1.14312	1.50261	0.858197	1.01251	2.51235	1.12514	0.529368	3.1248	38046905	VIT_202s0154g00170.1	VIT_202s0154g00170.1	PF07992	PTHR23023,PTHR23023:SF94	KOG1399			GO:0055114,GO:0016491	AT1G63370.1		Flavin-binding monooxygenase family protein	K1
206	VIT_202s0154g00510	0.111361	0	0.0386927	0	0.62509	0.100893	0.037476	0.481087	38045726	VIT_202s0154g00510.1	VIT_202s0154g00510.1	PF00650	PTHR23324,PTHR23324:SF63	KOG1471				AT5G47510.1		Sec14p-like phosphatidylinositol transfer family protein	K1
207	VIT_202s0154g00550	15.4591	10.5959	8.63525	13.9869	14.6789	14.6644	13.0322	16.9459	38046731	VIT_202s0154g00550.1	VIT_202s0154g00550.1	PF00226,PF11875	PTHR24078,PTHR24078:SF285			K09531		AT2G35720.1	OWL1	DNAJ heat shock N-terminal domain-containing protein	K1
208	VIT_202s0154g00600	15.1478	0.70515	0.157215	0.440492	17.1431	15.7653	10.8719	22.3998	38046405	VIT_202s0154g00600.1	VIT_202s0154g00600.1	PF01095	PTHR31321,PTHR31321:SF19		3.1.1.11		GO:0042545,GO:0030599,GO:0005618	AT5G47500.1		Pectin lyase-like superfamily protein	K1
209	VIT_203s0017g01240	9.09969	5.86447	7.12022	6.35073	17.7734	6.51761	5.04985	27.2933	38035375	VIT_203s0017g01240.1	VIT_203s0017g01240.1	PF03060	PTHR32332,PTHR32332:SF20		1.3.1.9		GO:0055114,GO:0018580	AT5G64250.2		Aldolase-type TIM barrel family protein	K1
210	VIT_203s0017g01280	69.1588	62.1538	75.444	73.2788	212.42	34.8279	54.3231	256.724	38034464	VIT_203s0017g01280.1	VIT_203s0017g01280.1	PF00005,PF01061	PTHR19241,PTHR19241:SF301	KOG0061	3.6.3.36		GO:0016887,GO:0005524,GO:0016020	AT1G17840.1	ABCG11,ATWBC11,COF1,DSO,WBC11	white-brown complex homolog protein 11	K1
211	VIT_203s0017g01400	2.68309	7.05989	0	0	30.2678	4.89377	7.52934	26.0029	38034962	VIT_203s0017g01400.1	VIT_203s0017g01400.1	PF12734	PTHR31568,PTHR31568:SF17					AT2G32210.1			K1
212	VIT_203s0017g01410	21.1089	16.7415	6.65293	28.4557	167.179	39.5073	19.9457	109.181	38034653	VIT_203s0017g01410.1	VIT_203s0017g01410.1	PF12734	PTHR31568,PTHR31568:SF17					AT2G32210.1			K1
213	VIT_203s0017g01840	0.257995	0.0241167	0.201207	0.427648	0.618769	0.020044	0	1.15076	38034596	VIT_203s0017g01840.1	VIT_203s0017g01840.1	PF00931	PTHR23155				GO:0043531	AT3G50950.1	ZAR1	HOPZ-ACTIVATED RESISTANCE 1	K1
214	VIT_203s0017g01940	247.525	483.198	211.894	132.416	585.545	355.755	370.055	449.505	38036023	VIT_203s0017g01940.1	VIT_203s0017g01940.1	PF05678	PTHR33179,PTHR33179:SF7					AT3G22160.1		VQ motif-containing protein	K1
215	VIT_203s0017g02140	2.94373	4.22291	4.19938	2.29114	7.0517	7.3703	4.90759	7.13317	38034344	VIT_203s0017g02140.1	VIT_203s0017g02140.1	PF00201	PTHR11926,PTHR11926:SF319				GO:0016758,GO:0008152	AT3G21790.1		UDP-Glycosyltransferase superfamily protein	K1
216	VIT_203s0017g02390	9.41316	10.108	9.45408	11.1785	12.7214	8.29018	10.5325	18.4326	38035453	VIT_203s0017g02390.1	VIT_203s0017g02390.1	PF11715	PTHR21286			K14303		AT1G33410.2	ATNUP160,NUP160,SAR1	SUPPRESSOR OF AUXIN RESISTANCE1	K1
217	VIT_203s0038g00150	0.148988	0	0.009906	0.041312	0.243803	0.107342	0.072091	0.293221	38035549	VIT_203s0038g00150.1	VIT_203s0038g00150.1	PF02140,PF01301	PTHR23421,PTHR23421:SF71		3.2.1.23		GO:0030246,GO:0005975,GO:0004553	AT4G36360.1	BGAL3	beta-galactosidase 3	K1
218	VIT_203s0038g00530	0	0.14292	0.354321	0	3.17935	0.381346	0.368494	1.93157	38034815	VIT_203s0038g00530.1	VIT_203s0038g00530.1	PF02902	PTHR12606		3.4.22.68		GO:0008234,GO:0006508	AT3G06910.1	ULP1A	UB-like protease 1A	K1
219	VIT_203s0038g00830	1.12047	1.0635	0.931969	0.785688	1.82716	0.752105	1.1171	2.04786	38055326	VIT_203s0038g00830.1	VIT_203s0038g00830.1	PF16488,PF08699,PF02170,PF16486,PF02171	PTHR22891,PTHR22891:SF9			K11593	GO:0005515,GO:0003676	AT1G69440.1	AGO7,ZIP	Argonaute family protein	K1
220	VIT_203s0038g00970	35.4218	43.0681	41.6333	37.9452	36.6979	38.6615	42.3862	48.1472	38055346	VIT_203s0038g00970.1	VIT_203s0038g00970.1	PF02212,PF00350,PF01031	PTHR11566,PTHR11566:SF75			K17065	GO:0005525,GO:0003924	AT4G33650.1	ADL2,DRP3A	dynamin-related protein 3A	K1
221	VIT_203s0038g01830	4.13967	0.853356	1.95993	1.97942	3.70845	1.96587	1.00203	7.71208	38036083	VIT_203s0038g01830.1	VIT_203s0038g01830.1	PF01190	PTHR33935					AT2G21140.1	ATPRP2,PRP2	proline-rich protein 2	K1
222	VIT_203s0038g01920	6.74046	7.46575	10.0892	8.06765	8.48021	6.6854	9.01905	8.95378	38034829	VIT_203s0038g01920.1	VIT_203s0038g01920.1		PTHR31431,PTHR31431:SF1			K14311		AT4G38760.1		Protein of unknown function (DUF3414)	K1
223	VIT_203s0038g01950	90.3578	86.5046	86.9453	86.2721	130.041	95.6293	104.883	145.899	38035547	VIT_203s0038g01950.1	VIT_203s0038g01950.1	PF06273	PTHR32091,PTHR32091:SF5					AT4G38710.2		glycine-rich protein	K1
224	VIT_203s0038g02280	120.063	43.7426	31.917	33.4938	145.82	126.664	153.492	202.202	38035435	VIT_203s0038g02280.1	VIT_203s0038g02280.1	PF06911	PTHR21068,PTHR21068:SF22					AT2G17840.1	ERD7	Senescence/dehydration-associated protein-related	K1
225	VIT_203s0038g02340	51.3587	53.5581	57.5518	62.5592	52.4325	54.0812	63.4467	70.0429	38034855	VIT_203s0038g02340.1	VIT_203s0038g02340.1	PF00632	PTHR11254,PTHR11254:SF73		6.3.2.19	K10590	GO:0004842	AT4G38600.1	KAK,UPL3	HEAT repeat ;HECT-domain (ubiquitin-transferase)	K1
226	VIT_203s0038g02440	78.043	102.781	89.2309	131.605	109.576	136.424	95.418	137.345	38035562	VIT_203s0038g02440.1	VIT_203s0038g02440.1	PF00403	PTHR22814,PTHR22814:SF155	KOG1603			GO:0046872,GO:0030001	AT4G38580.1	ATFP6,FP6,HIPP26	farnesylated protein 6	K1
227	VIT_203s0038g02830	21.5346	14.3293	15.5887	19.1431	21.6499	19.0031	21.8875	23.496	38035559	VIT_203s0038g02830.1	VIT_203s0038g02830.1	PF03810,PF02985,PF13513	PTHR10527,PTHR10527:SF3			K18752	GO:0008536,GO:0006886,GO:0005515	AT2G16950.2	ATTRN1,TRN1	transportin 1	K1
228	VIT_203s0038g03830	17.6727	12.9284	20.5709	12.6096	22.5191	19.8075	16.0132	22.3399	38035726	VIT_203s0038g03830.1	VIT_203s0038g03830.1	PF00439	PTHR22881,PTHR22881:SF16				GO:0005515	AT1G20670.1		DNA-binding bromodomain-containing protein	K1
229	VIT_203s0038g03840	7.08898	10.1412	9.79488	5.49203	9.53625	8.26758	6.4101	9.58026	38035132	VIT_203s0038g03840.1	VIT_203s0038g03840.1	PF05742	PTHR17985,PTHR17985:SF13					AT4G38260.1		Protein of unknown function (DUF833)	K1
230	VIT_203s0038g04340	0.55413	0	0.0550847	0.0166217	0.53365	0.56719	0.30453	0.543442	38035266	VIT_203s0038g04340.1	VIT_203s0038g04340.1	PF11721,PF07714	PTHR27003,PTHR27003:SF106	KOG1187	2.7.11.1		GO:0006468,GO:0004672	AT4G39110.1		Malectin/receptor-like protein kinase family protein	K1
231	VIT_203s0038g04390	3.64115	0	0	0.305057	3.3355	2.20967	2.97174	3.97293	38035598	VIT_203s0038g04390.1	VIT_203s0038g04390.1	PF00257	PTHR33346				GO:0009415,GO:0006950	AT2G21490.1	LEA	dehydrin LEA	K1
232	VIT_203s0038g04610	27.9069	16.5742	19.0427	27.3558	25.6624	24.3752	25.5425	32.7253	38036192	VIT_203s0038g04610.1	VIT_203s0038g04610.1	PF11861,PF01728,PF07780	PTHR10920,PTHR10920:SF13		2.1.1.167	K14857	GO:0032259,GO:0008168,GO:0006364,GO:0005634,GO:0001510,GO:0031167,GO:0008649	AT4G25730.1		FtsJ-like methyltransferase family protein	K1
233	VIT_203s0063g00030	4.82066	1.66114	1.70472	0.708199	9.54743	4.13142	2.42654	11.3637	38035749	VIT_203s0063g00030.1	VIT_203s0063g00030.1	PF04669	PTHR31444,PTHR31444:SF0					AT5G67210.1		Protein of unknown function (DUF579)	K1
234	VIT_203s0063g00050	60.1044	18.2996	13.6121	6.81321	266.447	72.1102	108.939	344.737	38035134	VIT_203s0063g00050.1	VIT_203s0063g00050.1	PF00201	PTHR11926,PTHR11926:SF411	KOG1192	2.4.1.263	K14595	GO:0016758,GO:0008152	AT2G15490.1	UGT73B4	UDP-glycosyltransferase 73B4	K1
235	VIT_203s0063g00060	13.9276	26.6937	11.9974	8.99185	226.974	24.7325	13.5675	210.086	38034442	VIT_203s0063g00060.1	VIT_203s0063g00060.1	PF00571	PTHR11911,PTHR11911:SF109					AT4G36910.1	CDCP2,LEJ2	Cystathionine beta-synthase (CBS) family protein	K1
236	VIT_203s0063g00080	87.3696	97.4192	92.3742	87.1984	239.487	88.1341	90.8702	194.816	38035163	VIT_203s0063g00080.1	VIT_203s0063g00080.1	PF12906	PTHR13145		6.3.2.19		GO:0008270	AT4G34100.2		RING/U-box superfamily protein	K1
237	VIT_203s0063g00180	78.3184	73.7283	99.3536	99.598	173.405	86.065	119.019	243.196	38034317	VIT_203s0063g00180.1	VIT_203s0063g00180.1	PF04564	PTHR22849,PTHR22849:SF52		6.3.2.19		GO:0016567,GO:0004842	AT1G49780.1	PUB26	plant U-box 26	K1
238	VIT_203s0063g00280	33.6738	23.5152	13.4663	20.6929	78.2167	45.9541	38.8713	76.7397	38035083	VIT_203s0063g00280.1	VIT_203s0063g00280.1	PF00085	PTHR10438,PTHR10438:SF233	KOG0910	1.8.1.8		GO:0045454,GO:0015035,GO:0006662	AT2G15570.2	ATHM3,ATM3,GAT1,TRX-M3	Thioredoxin superfamily protein	K1
239	VIT_203s0063g00600	10.0389	11.3503	11.9749	12.5273	23.473	11.2908	11.5	20.8236	38035793	VIT_203s0063g00600.1	VIT_203s0063g00600.1	PF12624,PF09333	PTHR13190,PTHR13190:SF1			K17906	GO:0006914	AT3G19190.1	ATATG2,ATG2	autophagy 2	K1
240	VIT_203s0063g00700	1.48116	0.964976	0.0580323	1.06418	42.3495	4.29417	1.58217	31.2717	38035166	VIT_203s0063g00700.1	VIT_203s0063g00700.1	PF00135	PTHR23024,PTHR23024:SF138	KOG1515	3.1.1.1			AT1G47480.1		alpha/beta-Hydrolases superfamily protein	K1
241	VIT_203s0063g00720	0.917961	0.253991	0.414133	0.624073	59.6484	1.78413	2.09443	58.0056	38034651	VIT_203s0063g00720.1	VIT_203s0063g00720.1	PF00135	PTHR23024,PTHR23024:SF138	KOG1515	3.1.1.1			AT1G47480.1		alpha/beta-Hydrolases superfamily protein	K1
242	VIT_203s0063g00770	4.23454	0.881863	0.718129	1.17843	6.56615	12.3433	2.4101	11.8758	38034894	VIT_203s0063g00770.1	VIT_203s0063g00770.1	PF00135	PTHR23024,PTHR23024:SF228	KOG1515	3.1.1.1			AT2G03550.1		alpha/beta-Hydrolases superfamily protein	K1
243	VIT_203s0063g01560	1.24336	0.999137	0.093999	0.15631	10.3611	0.581202	0.131758	18.0172	38034193	VIT_203s0063g01560.1	VIT_203s0063g01560.1	PF00067	PTHR24298,PTHR24298:SF102	KOG0156			GO:0055114,GO:0020037,GO:0016705,GO:0005506	AT4G31940.1	CYP82C4	cytochrome P450, family 82, subfamily C, polypeptide 4	K1
244	VIT_203s0063g01750	7.20331	6.12895	8.94522	9.10962	9.32719	7.83534	8.84574	12.8092	38035986	VIT_203s0063g01750.1	VIT_203s0063g01750.1	PF02260,PF00454	PTHR11139,PTHR11139:SF71		2.7.11.1	K08873	GO:0005515,GO:0016773	AT1G50030.1	TOR	target of rapamycin	K1
245	VIT_203s0063g01790	20.2547	6.29937	3.86077	3.65784	74.4685	10.172	10.5515	83.3135	38035054	VIT_203s0063g01790.1	VIT_203s0063g01790.1	PF00400	PTHR22844,PTHR22844:SF145	KOG0271	2.7.11.7		GO:0005515	AT2G26490.1		Transducin/WD40 repeat-like superfamily protein	K1
246	VIT_203s0063g02260	15.4879	16.8391	17.5488	17.0926	15.0212	15.2351	17.7324	20.3308	38034558	VIT_203s0063g02260.1	VIT_203s0063g02260.1	PF00613,PF00454	PTHR10048,PTHR10048:SF15		2.7.1.67	K00888	GO:0016773,GO:0048015,GO:0046854	AT1G49340.2	ATPI4K ALPHA	Phosphatidylinositol 3- and 4-kinase family protein	K1
247	VIT_203s0091g00050	30.3606	19.1435	20.3849	15.4927	58.9195	35.3445	30.8971	59.9585	38035340	VIT_203s0091g00050.1	VIT_203s0091g00050.1	PF04083	PTHR11005,PTHR11005:SF37	KOG2624	3.1.1.3	K01052	GO:0006629	AT2G15230.1	ATLIP1,LIP1	lipase 1	K1
248	VIT_203s0091g00160	77.7018	179.243	103.2	64.3519	224.496	70.9329	68.2124	212.942	38034557	VIT_203s0091g00160.1	VIT_203s0091g00160.1	PF04450	PTHR33321					AT2G15220.1		Plant basic secretory protein (BSP) family protein	K1
249	VIT_203s0091g00240	2.84423	1.30533	1.68083	1.72595	2.07862	1.21395	1.74876	3.05303	38035730	VIT_203s0091g00240.1	VIT_203s0091g00240.1	PF14498	PTHR31084,PTHR31084:SF0		3.2.1.51	K15923		AT4G34260.1	FUC95A	1,2-alpha-L-fucosidases	K1
250	VIT_203s0091g01040	126.147	111.282	58.3884	65.4177	375.26	157.452	83.2552	342.603	38035553	VIT_203s0091g01040.1	VIT_203s0091g01040.1		PTHR31568,PTHR31568:SF3								K1
251	VIT_203s0132g00210	13.323	10.1856	12.6706	12.8792	11.2746	11.2689	13.5301	14.5679	38034249	VIT_203s0132g00210.1	VIT_203s0132g00210.1	PF00171	PTHR11699,PTHR11699:SF183	KOG2450	1.2.1.27	K00140	GO:0055114,GO:0016491,GO:0008152	AT2G14170.1	ALDH6B2	aldehyde dehydrogenase 6B2	K1
252	VIT_203s0180g00010	90.9605	86.6817	74.0672	69.7768	110.731	81.7588	74.2863	161.611	38034328	VIT_203s0180g00010.1	VIT_203s0180g00010.1	PF00396,PF08246,PF00112	PTHR12411,PTHR12411:SF344	KOG1543	3.4.22.14		GO:0008234,GO:0006508	AT1G47128.1	RD21,RD21A	Granulin repeat cysteine protease family protein	K1
253	VIT_203s0180g00030	161.224	189.532	69.3424	66.1652	777.855	228.812	240.77	658.619	38034997	VIT_203s0180g00030.1	VIT_203s0180g00030.1	PF00168	PTHR10024				GO:0005515	AT4G34150.1		Calcium-dependent lipid-binding (CaLB domain) family protein	K1
254	VIT_203s0180g00210	26.0823	20.6527	6.78706	3.09545	42.8239	26.5218	39.9113	71.9566	38035866	VIT_203s0180g00210.1	VIT_203s0180g00210.1	PF00249	PTHR10641,PTHR10641:SF639	KOG0048		K09422		AT5G67300.1	ATMYB44,ATMYBR1,MYB44,MYBR1	myb domain protein r1	K1
255	VIT_204s0008g00180	12.3177	12.9905	12.1709	12.641	21.9963	11.0362	13.4958	22.6341	38067465	VIT_204s0008g00180.1	VIT_204s0008g00180.1	PF03949,PF00390	PTHR23406,PTHR23406:SF31		1.1.1.40		GO:0055114,GO:0051287,GO:0004471	AT5G11670.1	ATNADP-ME2,NADP-ME2	NADP-malic enzyme 2	K1
256	VIT_204s0008g00470	74.4278	46.1919	47.8894	63.5506	89.4201	62.1704	37.6156	115.964	38068627	VIT_204s0008g00470.1	VIT_204s0008g00470.1	PF03386	PTHR33605,PTHR33605:SF3					AT5G25940.1		early nodulin-related	K1
257	VIT_204s0008g00585	6.36961	5.36778	6.1387	6.4818	8.60607	6.10128	7.3063	10.4737	38067671	VIT_204s0008g00585.1	VIT_204s0008g00585.1		PTHR31513,PTHR31513:SF1					AT5G11700.2			K1
258	VIT_204s0008g01330	3.46439	2.07985	4.14286	3.13752	4.07232	2.37537	2.08365	5.69501	38069039	VIT_204s0008g01330.1	VIT_204s0008g01330.1	PF05608	PTHR20921	KOG3150				AT2G26070.1	RTE1	Protein of unknown function (DUF778)	K1
259	VIT_204s0008g02390	55.7124	72.876	63.5707	63.2166	164.123	74.2028	77.9532	168.789	38067766	VIT_204s0008g02390.1	VIT_204s0008g02390.1	PF13639	PTHR22937,PTHR22937:SF53				GO:0008270,GO:0005515	AT5G10650.2		RING/U-box superfamily protein	K1
260	VIT_204s0008g02540	23.6558	31.6798	33.8674	27.54	35.1506	23.2091	23.3403	37.943	38068681	VIT_204s0008g02540.1	VIT_204s0008g02540.1	PF12171,PF12756	PTHR13182,PTHR13182:SF8	KOG2785		K14816		AT4G31420.1		Zinc finger protein 622	K1
261	VIT_204s0008g02660	0.482183	0.331323	0.147654	0.189223	1.13006	0.725463	0.807749	1.08698	38068959	VIT_204s0008g02660.1	VIT_204s0008g02660.1	PF00515,PF07719	PTHR23083,PTHR23083:SF39				GO:0005515,GO:0035058,GO:0034464	AT2G43040.1	NPG1	tetratricopeptide repeat (TPR)-containing protein	K1
262	VIT_204s0008g03640	0.156061	0	0	0.0352267	0.876187	0.402388	0.273552	0.693965	38068124	VIT_204s0008g03640.1	VIT_204s0008g03640.1	PF01565,PF04030	PTHR13878,PTHR13878:SF51		1.1.3.8,1.1.3.37		GO:0055114,GO:0050660,GO:0016491,GO:0016020,GO:0003885	AT5G11540.1		D-arabinono-1,4-lactone oxidase family protein	K1
263	VIT_204s0008g04520	11.1121	11.7127	13.0563	12.7331	14.9401	12.1561	12.4547	16.9815	38069091	VIT_204s0008g04520.1	VIT_204s0008g04520.1		PTHR35478,PTHR35478:SF1			K19027		AT2G25730.2			K1
264	VIT_204s0008g05030	99.5795	84.3505	72.3545	74.4908	332.912	101.36	84.4115	216.122	38068131	VIT_204s0008g05030.1	VIT_204s0008g05030.1	PF00025	PTHR24071	KOG0096	4.2.1.17	K07936	GO:0005525	AT5G55190.1	ATRAN3,RAN3	RAN GTPase 3	K1
265	VIT_204s0008g05780	13.1163	12.1489	13.9845	13.5241	12.3088	12.093	12.7851	20.4146	38066799	VIT_204s0008g05780.1	VIT_204s0008g05780.1	PF00400,PF04494	PTHR19879,PTHR19879:SF1			K03130	GO:0005515,GO:0006355,GO:0005634	AT5G25150.1	TAF5	TBP-associated factor 5	K1
266	VIT_204s0008g05840	8.23451	9.92168	6.40412	7.09043	11.6084	6.11035	5.38908	12.7351	38066486	VIT_204s0008g05840.1	VIT_204s0008g05840.1	PF01578,PF10517,PF03351	PTHR23130,PTHR23130:SF84	KOG4731			GO:0020037,GO:0017004	AT5G54830.1		DOMON domain-containing protein / dopamine beta-monooxygenase N-terminal domain-containing protein	K1
267	VIT_204s0008g05880	12.4655	12.6744	13.3386	14.0577	14.8028	11.2275	13.3285	17.9487	38068654	VIT_204s0008g05880.1	VIT_204s0008g05880.1	PF00628,PF04851,PF00271,PF06465,PF00385,PF06461	PTHR10799,PTHR10799:SF741		3.6.4.12		GO:0005515,GO:0016787,GO:0005524,GO:0003677	AT2G25170.1	CHD3,CHR6,GYM,PKL,SSL2	chromatin remodeling factor CHD3 (PICKLE)	K1
268	VIT_204s0008g05920	27.2481	31.269	27.781	24.7965	28.8597	30.1401	26.7514	36.2234	38069150	VIT_204s0008g05920.1	VIT_204s0008g05920.1	PF10548,PF12352	PTHR21094,PTHR21094:SF1	KOG3208		K08495	GO:0016021,GO:0006888,GO:0005801,GO:0000139	AT1G15880.1	atgos11,GOS11	golgi snare 11	K1
269	VIT_204s0008g05990	8.60115	8.75323	13.857	11.9918	11.4245	6.16538	5.95515	15.9335	38066765	VIT_204s0008g05990.1	VIT_204s0008g05990.1	PF00291	PTHR10314,PTHR10314:SF125		4.2.3.1	K01733		AT4G29840.1	MTO2,TS	Pyridoxal-5\'-phosphate-dependent enzyme family protein	K1
270	VIT_204s0008g06180	3.00328	3.1934	4.1919	3.96831	4.75561	2.92705	4.68171	5.86271	38067674	VIT_204s0008g06180.1	VIT_204s0008g06180.1	PF13831,PF13832	PTHR13793,PTHR13793:SF87	KOG1973				AT1G05830.1	ATX2,SDG30	trithorax-like protein 2	K1
271	VIT_204s0008g06190	1.18137	1.25263	1.00696	1.34302	1.7202	1.22771	1.38841	2.17236	38066904	VIT_204s0008g06190.1	VIT_204s0008g06190.1	PF07727	PTHR11439,PTHR11439:SF163		2.7.7.49			AT4G23160.1	CRK8	cysteine-rich RLK (RECEPTOR-like protein kinase) 8	K1
272	VIT_204s0008g06250	13.9844	29.139	25.1832	31.5603	92.1082	23.1683	24.052	92.6938	38068345	VIT_204s0008g06250.1	VIT_204s0008g06250.1		PTHR33132,PTHR33132:SF12					AT5G11090.1		serine-rich protein-related	K1
273	VIT_204s0008g06310	17.3519	18.7906	9.89225	10.1601	31.4473	18.9689	20.3965	52.8259	38069331	VIT_204s0008g06310.1	VIT_204s0008g06310.1	PF00564,PF13414	PTHR22904,PTHR22904:SF367				GO:0005515	AT2G25290.1		Octicosapeptide/Phox/Bem1p (PB1) domain-containing protein / tetratricopeptide repeat (TPR)-containing protein	K1
274	VIT_204s0008g06810	23.2406	21.084	21.298	22.071	20.8521	21.4322	22.7716	25.7915	38069188	VIT_204s0008g06810.1	VIT_204s0008g06810.1	PF04818,PF08312,PF00076,PF01805	PTHR23140,PTHR23140:SF0			K12842	GO:0003676,GO:0006396,GO:0003723	AT5G25060.1		RNA recognition motif (RRM)-containing protein	K1
275	VIT_204s0008g06820	6.66197	4.07497	6.17727	5.90076	5.6386	6.61433	7.42253	9.07741	38067497	VIT_204s0008g06820.1	VIT_204s0008g06820.1	PF12776	PTHR31704,PTHR31704:SF10					AT2G24960.2			K1
276	VIT_204s0008g06970	29.6521	31.6754	16.9038	20.1059	52.9916	27.5497	20.2416	79.943	38067193	VIT_204s0008g06970.1	VIT_204s0008g06970.1		PTHR15852,PTHR15852:SF13					AT2G24860.1		DnaJ/Hsp40 cysteine-rich domain superfamily protein	K1
277	VIT_204s0023g00290	20.2466	16.4177	11.3602	15.1731	49.2151	19.5868	14.1218	51.2779	38067184	VIT_204s0023g00290.1	VIT_204s0023g00290.1	PF00005	PTHR24220,PTHR24220:SF441		3.6.3.25		GO:0016887,GO:0005524	AT1G65410.1	ATNAP11,NAP11,TGD3	non-intrinsic ABC protein 11	K1
278	VIT_204s0023g01150	8.57467	3.57677	2.77816	0.868736	13.1887	5.44225	4.11801	12.647	38066507	VIT_204s0023g01150.1	VIT_204s0023g01150.1	PF04678	PTHR13462,PTHR13462:SF4	KOG2966				AT2G23790.1		Protein of unknown function (DUF607)	K1
279	VIT_204s0023g01430	27.4142	24.7945	29.4326	25.7217	38.8011	28.0571	17.7659	44.3633	38067975	VIT_204s0023g01430.1	VIT_204s0023g01430.1	PF12171	PTHR10593,PTHR10593:SF28					AT5G66730.1		C2H2-like zinc finger protein	K1
280	VIT_204s0023g01460	8.75314	8.05948	11.5123	11.2517	9.95195	7.50459	4.99399	14.5082	38068829	VIT_204s0023g01460.1	VIT_204s0023g01460.1	PF01535,PF13041	PTHR24015,PTHR24015:SF506					AT4G36680.1		Tetratricopeptide repeat (TPR)-like superfamily protein	K1
281	VIT_204s0023g01890	0.723304	0.528873	0.192442	0.039936	0.867274	0.34643	0.638948	0.847184	38067253	VIT_204s0023g01890.1	VIT_204s0023g01890.1		PTHR23241,PTHR23241:SF62	KOG4744				AT4G36600.1		Late embryogenesis abundant (LEA) protein	K1
282	VIT_204s0023g02110	19.2038	34.9749	23.5025	19.6318	40.1013	21.4668	22.2045	40.9246	38067883	VIT_204s0023g02110.1	VIT_204s0023g02110.1		PTHR35490,PTHR35490:SF1					AT3G50910.1			K1
283	VIT_204s0023g02460	26.2832	29.015	27.1408	31.3208	21.4927	23.9231	28.8501	33.1991	38068491	VIT_204s0023g02460.1	VIT_204s0023g02460.1	PF00400	PTHR14091	KOG0270		K14791	GO:0005515	AT4G18905.1		Transducin/WD40 repeat-like superfamily protein	K1
284	VIT_204s0023g02950	19.9927	18.7267	14.8166	18.0609	62.5578	20.3922	23.7045	93.5088	38069215	VIT_204s0023g02950.1	VIT_204s0023g02950.1	PF02213,PF02201,PF03126	PTHR22884,PTHR22884:SF339	KOG1946			GO:0005515,GO:0003677	AT3G51120.1		DNA binding;zinc ion binding;nucleic acid binding;nucleic acid binding	K1
285	VIT_204s0023g03350	21.3528	23.1647	26.7038	29.5723	27.488	26.3786	30.2615	35.9555	38068784	VIT_204s0023g03350.1	VIT_204s0023g03350.1	PF00454,PF02259	PTHR11139,PTHR11139:SF1		2.7.11.1	K08874	GO:0016773,GO:0005515	AT2G17930.1		Phosphatidylinositol 3- and 4-kinase family protein with FAT domain	K1
286	VIT_204s0023g03920	10.6408	11.8835	12.8782	7.66285	20.0891	9.94449	10.3817	28.0494	38068307	VIT_204s0023g03920.1	VIT_204s0023g03920.1		PTHR22835,PTHR22835:SF196					AT1G20110.1		RING/FYVE/PHD zinc finger superfamily protein	K1
287	VIT_204s0043g00600	4.47736	5.26439	4.13908	4.95554	8.09609	4.62481	4.96997	7.92168	38067247	VIT_204s0043g00600.1	VIT_204s0043g00600.1	PF12074	PTHR23346,PTHR23346:SF19					AT1G64790.1	ILA	ILITYHIA	K1
288	VIT_204s0044g00030	11.475	9.86573	10.435	11.9307	15.5391	10.6886	11.3994	15.4048	38068257	VIT_204s0044g00030.1	VIT_204s0044g00030.1	PF02383	PTHR11200,PTHR11200:SF120		3.1.3.66		GO:0042578,GO:0052866	AT3G51460.1	RHD4	Phosphoinositide phosphatase family protein	K1
289	VIT_204s0044g00120	3.14949	3.7795	1.64366	6.96633	4.21907	5.03006	4.82251	5.25014	38068213	VIT_204s0044g00120.1	VIT_204s0044g00120.1	PF00004	PTHR20953		3.6.1.15	K06928	GO:0005524	AT5G66005.3		Expressed protein	K1
290	VIT_204s0044g01180	19.4417	17.68	14.9612	19.9904	20.4328	18.4795	18.3953	23.3054	38066965	VIT_204s0044g01180.1	VIT_204s0044g01180.1	PF05496	PTHR23076,PTHR23076:SF49	KOG0731			GO:0009378,GO:0006310,GO:0006281	AT5G64580.1		AAA-type ATPase family protein	K1
291	VIT_204s0044g01290	94.5996	94.4072	47.3612	41.2721	220.147	103.584	120.948	323.979	38068138	VIT_204s0044g01290.1	VIT_204s0044g01290.1	PF14531	PTHR24361,PTHR24361:SF310	KOG0198	2.7.11.25			AT1G53570.4	MAP3KA,MAPKKK3	mitogen-activated protein kinase kinase kinase 3	K1
292	VIT_204s0044g01420	16.9683	21.9655	6.44659	5.71623	30.2787	24.0065	25.7223	35.3276	38066462	VIT_204s0044g01420.1	VIT_204s0044g01420.1	PF12708	PTHR31339,PTHR31339:SF4					AT4G33440.1		Pectin lyase-like superfamily protein	K1
293	VIT_204s0044g01500	1.32916	0.059839	0.246293	0.211259	2.13963	1.22697	1.24645	4.519	38068890	VIT_204s0044g01500.1	VIT_204s0044g01500.1	PF02365	PTHR31719,PTHR31719:SF20				GO:0006355,GO:0003677	AT5G64530.1	ANAC104,XND1	xylem NAC domain 1	K1
294	VIT_204s0044g02010	2.39917	3.64331	0.870244	2.03293	9.27575	2.26985	1.92853	6.48596	38066738	VIT_204s0044g02010.1	VIT_204s0044g02010.1	PF14226,PF03171	PTHR10209,PTHR10209:SF108	KOG0143			GO:0055114,GO:0016491	AT1G14130.1		2-oxoglutarate (2OG) and Fe(II)-dependent oxygenase superfamily protein	K1
295	VIT_204s0069g00200	0.304972	1.85564	0.203329	0.117298	1.29894	0.583264	0.232543	1.25015	38067764	VIT_204s0069g00200.1	VIT_204s0069g00200.1	PF13458	PTHR18966,PTHR18966:SF204					AT5G27100.1	ATGLR2.1,GLR2.1	glutamate receptor 2.1	K1
296	VIT_204s0069g00210	0.606978	1.14558	0.0480987	0.043964	2.01343	0.31727	0.264496	2.93249	38066591	VIT_204s0069g00210.1	VIT_204s0069g00210.1	PF00497,PF00060	PTHR18966,PTHR18966:SF204				GO:0016020,GO:0004970	AT2G29110.1	ATGLR2.8,GLR2.8	glutamate receptor 2.8	K1
297	VIT_204s0069g00670	0.017858	0	0	0.00958433	0.218602	0.071889	0.04503	0.24684	38068876	VIT_204s0069g00670.1	VIT_204s0069g00670.1	PF00497,PF13458,PF00060	PTHR18966,PTHR18966:SF204	KOG1052			GO:0016020,GO:0004970	AT2G29110.1	ATGLR2.8,GLR2.8	glutamate receptor 2.8	K1
298	VIT_204s0069g00870	8.1516	8.63865	8.74865	10.5183	8.3296	8.40908	10.6974	12.3211	38068925	VIT_204s0069g00870.1	VIT_204s0069g00870.1		PTHR11915,PTHR11915:SF275	KOG0933,KOG4674				AT4G31570.1			K1
299	VIT_204s0069g00890	29.3149	32.1074	34.7207	37.011	28.7468	28.454	30.4571	40.2631	38068911	VIT_204s0069g00890.1	VIT_204s0069g00890.1	PF13476,PF13304,PF06470	PTHR18937,PTHR18937:SF8			K06669	GO:0005524,GO:0051276,GO:0005694,GO:0005515,GO:0008280,GO:0007064,GO:0006281,GO:0003682	AT2G27170.1	SMC3,TTN7	Structural maintenance of chromosomes (SMC) family protein	K1
300	VIT_204s0069g01010	17.3763	38.4385	25.807	18.1898	99.343	49.0407	19.8886	82.9096	38066898	VIT_204s0069g01010.1	VIT_204s0069g01010.1	PF03168	PTHR31852,PTHR31852:SF1					AT5G36970.1	NHL25	NDR1/HIN1-like 25	K1
301	VIT_204s0079g00200	17.0633	17.7921	19.982	17.7972	16.0257	14.7367	18.3246	20.7243	38067513	VIT_204s0079g00200.1	VIT_204s0079g00200.1	PF02309,PF02362,PF06507	PTHR31384,PTHR31384:SF2				GO:0006355,GO:0005634,GO:0003677,GO:0009725	AT5G37020.1	ARF8,ATARF8	auxin response factor 8	K1
302	VIT_204s0079g00790	44.0508	18.3668	11.834	11.1552	97.4587	22.1648	22.2872	123.077	38069068	VIT_204s0079g00790.1	VIT_204s0079g00790.1	PF13193,PF00501	PTHR24095,PTHR24095:SF189		6.2.1.12		GO:0008152,GO:0003824	AT1G65890.1	AAE12	acyl activating enzyme 12	K1
303	VIT_205s0020g00410	11.0394	12.6503	15.349	17.3258	14.6079	13.623	16.9368	19.6327	38073372	VIT_205s0020g00410.1	VIT_205s0020g00410.1	PF00168,PF06398,PF16909,PF06650,PF06101,PF12624,PF16910,PF16908	PTHR16166,PTHR16166:SF93	KOG1809			GO:0005515	AT1G48090.1		calcium-dependent lipid-binding family protein	K1
304	VIT_205s0020g00630	31.8752	40.1453	32.6284	33.3607	75.3435	29.8275	29.7652	68.9712	38072821	VIT_205s0020g00630.1	VIT_205s0020g00630.1	PF01833,PF00612,PF03859	PTHR23335,PTHR23335:SF10				GO:0005515,GO:0005634,GO:0003677	AT5G64220.1		Calmodulin-binding transcription activator protein with CG-1 and Ankyrin domains	K1
305	VIT_205s0020g00670	517.019	518.05	311.112	300.418	2652.06	522.715	425.664	1951.78	38074403	VIT_205s0020g00670.1	VIT_205s0020g00670.1	PF00438,PF02772,PF02773	PTHR11964,PTHR11964:SF16		2.5.1.6	K00789	GO:0006556,GO:0004478,GO:0005524	AT1G02500.2	AtSAM1,MAT1,SAM-1,SAM1	S-adenosylmethionine synthetase 1	K1
306	VIT_205s0020g00700	40.8954	47.5726	48.2484	45.9309	98.1107	43.5994	46.3198	153.15	38072522	VIT_205s0020g00700.1	VIT_205s0020g00700.1	PF03110	PTHR31251,PTHR31251:SF21				GO:0005634,GO:0003677	AT3G60030.1	SPL12	squamosa promoter-binding protein-like 12	K1
307	VIT_205s0020g01200	27.1677	24.7766	27.4391	25.5525	29.5182	21.7981	22.9595	50.5452	38071741	VIT_205s0020g01200.1	VIT_205s0020g01200.1	PF00225	PTHR24115,PTHR24115:SF511		3.6.4.4	K10393	GO:0008017,GO:0007018,GO:0005524,GO:0003777,GO:0005871	AT3G16630.2	ATKINESIN-13A,KINESIN-13A	P-loop containing nucleoside triphosphate hydrolases superfamily protein	K1
308	VIT_205s0020g01280	7.73061	9.23792	6.49853	7.767	8.62718	6.33044	8.71828	11.1294	38074302	VIT_205s0020g01280.1	VIT_205s0020g01280.1	PF11360	PTHR34962,PTHR34962:SF2					AT4G15820.1			K1
309	VIT_205s0020g01960	14.3484	10.3809	12.138	8.91892	20.775	11.5217	12.162	28.4504	38073680	VIT_205s0020g01960.1	VIT_205s0020g01960.1	PF00999	PTHR10110,PTHR10110:SF117				GO:0055085,GO:0016021,GO:0015299,GO:0006812	AT3G05030.1	ATNHX2,NHX2	sodium hydrogen exchanger 2	K1
310	VIT_205s0020g02420	15.6223	15.5221	21.6871	14.6887	14.1424	13.366	13.8018	20.5596	38073175	VIT_205s0020g02420.1	VIT_205s0020g02420.1	PF03909	PTHR16019,PTHR16019:SF7	KOG2690				AT1G03350.1		BSD domain-containing protein	K1
311	VIT_205s0020g02520	23.4873	16.2837	16.8217	17.8703	23.6661	21.4023	22.9579	26.0251	38073823	VIT_205s0020g02520.1	VIT_205s0020g02520.1	PF00651	PTHR24411,PTHR24411:SF33				GO:0005515	AT3G06190.1	ATBPM2,BPM2	BTB-POZ and MATH domain 2	K1
312	VIT_205s0020g02630	1.80858	1.57417	3.63105	1.21854	2.75671	1.33372	2.80037	4.03682	38072342	VIT_205s0020g02630.1	VIT_205s0020g02630.1	PF01715	PTHR11088,PTHR11088:SF30	KOG1384	2.5.1.27,2.5.1.112	K10760	GO:0008033	AT5G19040.1	ATIPT5,IPT5	isopentenyltransferase 5	K1
313	VIT_205s0020g02890	4.08948	1.36398	1.23038	1.90135	5.48454	2.04513	1.88004	5.03646	38071873	VIT_205s0020g02890.1	VIT_205s0020g02890.1		PTHR33976,PTHR33976:SF1					AT3G06035.1		Glycoprotein membrane precursor GPI-anchored	K1
314	VIT_205s0020g02960	22.7065	21.782	26.6808	24.299	20.8959	22.7354	27.0375	29.563	38073803	VIT_205s0020g02960.1	VIT_205s0020g02960.1	PF04851,PF14619,PF00271	PTHR10799,PTHR10799:SF640		3.6.4.12	K11647	GO:0016787,GO:0005524,GO:0003677,GO:0042393	AT3G06010.1	ATCHR12	Homeotic gene regulator	K1
315	VIT_205s0020g03090	30.8726	30.163	26.0359	23.3705	34.8418	25.1708	24.9676	41.2705	38073255	VIT_205s0020g03090.1	VIT_205s0020g03090.1	PF00571,PF00654	PTHR11689,PTHR11689:SF92			K05016	GO:0055085,GO:0016020,GO:0006821,GO:0005247	AT5G26240.1	ATCLC-D,CLC-D	chloride channel D	K1
316	VIT_205s0020g03150	53.6082	39.7439	53.0359	61.7595	65.4517	59.3359	61.9282	109.397	38073001	VIT_205s0020g03150.1	VIT_205s0020g03150.1		PTHR34798,PTHR34798:SF2					AT3G22380.1	TIC	time for coffee	K1
317	VIT_205s0020g03160	34.3147	34.942	29.1562	29.2565	61.1576	34.1283	32.9422	91.2578	38073956	VIT_205s0020g03160.1	VIT_205s0020g03160.1	PF09335	PTHR10281,PTHR10281:SF44	KOG1109				AT4G14950.1		SNARE associated Golgi protein family	K1
318	VIT_205s0020g03420	17.3934	21.0584	24.3937	25.7997	19.4665	17.666	20.86	26.0669	38071834	VIT_205s0020g03420.1	VIT_205s0020g03420.1	PF00628,PF16135	PTHR24098,PTHR24098:SF10		2.3.1.48		GO:0005515	AT4G14920.1		Acyl-CoA N-acyltransferase with RING/FYVE/PHD-type zinc finger protein	K1
319	VIT_205s0020g03600	7.10975	4.39199	3.93119	6.00264	6.59765	4.82174	6.18866	7.89829	38073358	VIT_205s0020g03600.1	VIT_205s0020g03600.1	PF07227	PTHR33345,PTHR33345:SF2					AT1G05410.1		Protein of unknown function (DUF1423)	K1
320	VIT_205s0020g03680	0.183007	2.87345	0	0.277345	4.29421	0.0827937	0	4.75296	38073751	VIT_205s0020g03680.1	VIT_205s0020g03680.1	PF13302	PTHR13256,PTHR13256:SF26				GO:0008080	AT3G22560.1		Acyl-CoA N-acyltransferases (NAT) superfamily protein	K1
321	VIT_205s0020g04460	43.502	40.8333	26.3781	32.8603	41.5492	33.1942	30.2218	64.8957	38074275	VIT_205s0020g04460.1	VIT_205s0020g04460.1	PF08477	PTHR11711,PTHR11711:SF31	KOG0070		K07950	GO:0007264,GO:0005525	AT3G22950.2	ARFC1,ATARFC1	ADP-ribosylation factor C1	K1
322	VIT_205s0020g04610	12.0052	13.0136	9.06654	8.41098	21.2156	13.4112	10.8021	30.8474	38074548	VIT_205s0020g04610.1	VIT_205s0020g04610.1	PF00069	PTHR27001,PTHR27001:SF241	KOG1187	2.7.11.1		GO:0006468,GO:0005524,GO:0004672	AT2G23770.1		protein kinase family protein / peptidoglycan-binding LysM domain-containing protein	K1
323	VIT_205s0020g04710	6.72331	9.73596	8.83819	9.51184	14.0017	7.06456	6.36095	11.9287	38072235	VIT_205s0020g04710.1	VIT_205s0020g04710.1	PF00626,PF04810,PF04815,PF08033,PF04811	PTHR11141,PTHR11141:SF4			K14006	GO:0030127,GO:0008270,GO:0006888,GO:0006886	AT5G43670.1		Sec23/Sec24 protein transport family protein	K1
324	VIT_205s0020g04990	0.657128	8.94236	1.98594	4.24016	8.32963	7.92285	2.88211	10.1961	38074007	VIT_205s0020g04990.1	VIT_205s0020g04990.1		PTHR33592,PTHR33592:SF2								K1
325	VIT_205s0029g00300	10.2244	11.6448	10.2443	11.7403	12.1728	11.3562	12.802	12.8022	38072991	VIT_205s0029g00300.1	VIT_205s0029g00300.1		PTHR18867,PTHR18867:SF12		3.6.3.25		GO:0030870,GO:0016887,GO:0006281,GO:0005634,GO:0000723	AT2G31970.1	ATRAD50,RAD50	DNA repair-recombination protein (RAD50)	K1
326	VIT_205s0029g00550	13.4626	9.31927	8.36612	11.9693	20.4645	10.9824	11.8751	17.948	38072676	VIT_205s0029g00550.1	VIT_205s0029g00550.1	PF07539	PTHR17695,PTHR17695:SF11	KOG1823		K14772		AT4G30990.1		ARM repeat superfamily protein	K1
327	VIT_205s0029g01070	20.7999	19.6669	20.952	22.801	21.4257	22.049	25.4609	26.7501	38072067	VIT_205s0029g01070.1	VIT_205s0029g01070.1	PF08142,PF04950	PTHR12858,PTHR12858:SF2	KOG1951		K14569	GO:0042254,GO:0005634	AT1G06720.1		P-loop containing nucleoside triphosphate hydrolases superfamily protein	K1
328	VIT_205s0029g01230	7.97891	6.35995	6.11978	8.61446	11.4366	6.25555	7.95447	10.5804	38073439	VIT_205s0029g01230.1	VIT_205s0029g01230.1	PF13020	PTHR32387,PTHR32387:SF0					AT4G13750.1	NOV	Histidine kinase-, DNA gyrase B-, and HSP90-like ATPase family protein	K1
329	VIT_205s0029g01240	3.92095	2.73671	2.29184	4.47875	5.338	3.58293	4.29649	5.44833	38073754	VIT_205s0029g01240.1	VIT_205s0029g01240.1		PTHR32387,PTHR32387:SF0					AT4G13750.1	NOV	Histidine kinase-, DNA gyrase B-, and HSP90-like ATPase family protein	K1
330	VIT_205s0029g01260	2.09357	1.92769	1.21494	2.0897	3.03425	1.93082	2.0365	4.69109	38072680	VIT_205s0029g01260.1	VIT_205s0029g01260.1		PTHR32387,PTHR32387:SF0					AT4G13750.1	NOV	Histidine kinase-, DNA gyrase B-, and HSP90-like ATPase family protein	K1
331	VIT_205s0029g01270	1.33502	1.4507	2.06519	1.42318	4.29098	1.77162	2.98096	5.41848	38072623	VIT_205s0029g01270.1	VIT_205s0029g01270.1		PTHR32387,PTHR32387:SF0					AT4G13750.1	NOV	Histidine kinase-, DNA gyrase B-, and HSP90-like ATPase family protein	K1
332	VIT_205s0049g00210	95.4215	18.2974	10.4667	16.4321	144.584	64.5187	69.8283	124.225	38071965	VIT_205s0049g00210.1	VIT_205s0049g00210.1	PF05514	PTHR31474,PTHR31474:SF3					AT4G14420.1		HR-like lesion-inducing protein-related	K1
333	VIT_205s0049g00500	3.24275	0.879679	0	0	9.04969	2.81551	2.80103	12.0803	38073477	VIT_205s0049g00500.1	VIT_205s0049g00500.1	PF00847	PTHR31190,PTHR31190:SF11				GO:0006355,GO:0003700	AT3G23230.1		Integrase-type DNA-binding superfamily protein	K1
334	VIT_205s0049g01140	0.102251	0	0.0711463	0.008448	0.301612	0.084108	0.217503	0.454056	38072614	VIT_205s0049g01140.1	VIT_205s0049g01140.1	PF16457,PF01363,PF13713,PF08381,PF00415	PTHR22870,PTHR22870:SF87	KOG1427			GO:0046872	AT3G23270.1		Regulator of chromosome condensation (RCC1) family with FYVE zinc finger domain	K1
335	VIT_205s0049g01220	8.91771	9.7538	10.3335	12.1825	13.0549	9.98438	9.13196	21.2667	38073140	VIT_205s0049g01220.1	VIT_205s0049g01220.1	PF00433,PF07714	PTHR24356,PTHR24356:SF208		2.7.11.1	K08790	GO:0006468,GO:0005524,GO:0004674,GO:0004672	AT4G14350.1		AGC (cAMP-dependent, cGMP-dependent and protein kinase C) kinase family protein	K1
336	VIT_205s0049g01420	5.93618	13.5465	5.38227	5.5771	30.1594	6.94571	2.38331	40.7203	38073442	VIT_205s0049g01420.1	VIT_205s0049g01420.1	PF04117	PTHR11266,PTHR11266:SF15	KOG1944		K13347	GO:0016021	AT4G14305.1		Peroxisomal membrane 22 kDa (Mpv17/PMP22) family protein	K1
337	VIT_205s0049g02360	11.8005	10.5904	10.8047	13.1176	13.422	11.9892	13.3979	19.0991	38072797	VIT_205s0049g02360.1	VIT_205s0049g02360.1	PF00271,PF00270	PTHR24031,PTHR24031:SF91	KOG0347	3.6.4.13	K14805	GO:0005524,GO:0003676	AT3G16840.1		P-loop containing nucleoside triphosphate hydrolases superfamily protein	K1
338	VIT_205s0051g00090	11.7752	10.9474	8.94459	11.2659	11.5856	11.2964	11.5771	16.0021	38073209	VIT_205s0051g00090.1	VIT_205s0051g00090.1		PTHR19306,PTHR19306:SF4	KOG1003				AT3G23980.1	BLI,KOS1	BLISTER	K1
339	VIT_205s0051g00140	1.25187	1.66491	0.983677	1.46582	1.69213	1.34264	1.19914	2.82882	38073117	VIT_205s0051g00140.1	VIT_205s0051g00140.1	PF05729,PF13676	PTHR11017,PTHR11017:SF169	KOG0472			GO:0007165,GO:0005515	AT5G17680.1		disease resistance protein (TIR-NBS-LRR class), putative	K1
340	VIT_205s0051g00230	0.326683	0.277178	0.352621	0.335602	0.768342	0.411143	0.397154	0.87777	38074511	VIT_205s0051g00230.1	VIT_205s0051g00230.1	PF05729	PTHR11017,PTHR11017:SF169	KOG0472				AT1G27170.1		transmembrane receptors;ATP binding	K1
341	VIT_205s0051g00750	10.3998	11.1752	10.8462	10.9718	11.167	9.40573	11.8002	14.5875	38073886	VIT_205s0051g00750.1	VIT_205s0051g00750.1							AT1G04790.1		RING/U-box superfamily protein	K1
342	VIT_205s0062g00610	1.17041	1.48748	0.262682	0	2.1555	0.700942	1.75707	1.777	38072820	VIT_205s0062g00610.1	VIT_205s0062g00610.1	PF06955,PF00722	PTHR31062,PTHR31062:SF34		2.4.1.207,3.2.1.151	K08235	GO:0048046,GO:0016762,GO:0006073,GO:0005618,GO:0005975,GO:0004553	AT3G23730.1	XTH16	xyloglucan endotransglucosylase/hydrolase 16	K1
343	VIT_205s0062g00710	0.941592	0.422806	0	0.301352	10.9401	1.07105	0.664891	22.2209	38074460	VIT_205s0062g00710.1	VIT_205s0062g00710.1	PF00201	PTHR11926,PTHR11926:SF98	KOG1192	2.4.1.271		GO:0016758,GO:0008152	AT4G15550.1	IAGLU	indole-3-acetate beta-D-glucosyltransferase	K1
344	VIT_205s0062g00820	34.6913	40.2006	28.6067	25.1713	55.4947	25.6308	41.158	93.5537	38071836	VIT_205s0062g00820.1	VIT_205s0062g00820.1	PF03819	PTHR14552,PTHR14552:SF17		3.6.1.12	K16904		AT3G25400.1			K1
345	VIT_205s0062g00860	5.98851	5.62006	6.92221	8.34304	6.73153	5.47243	7.30527	7.24787	38071812	VIT_205s0062g00860.1	VIT_205s0062g00860.1	PF01751,PF01131	PTHR11390,PTHR11390:SF20		5.99.1.2	K03165	GO:0006265,GO:0003916,GO:0003677,GO:0003917	AT2G32000.1		DNA topoisomerase, type IA, core	K1
346	VIT_205s0062g01000	47.9836	85.7489	73.257	56.8082	73.4998	65.7415	53.2874	81.2225	38074490	VIT_205s0062g01000.1	VIT_205s0062g01000.1	PF00248	PTHR11732,PTHR11732:SF226	KOG1575	1.1.1.317			AT1G60680.1		NAD(P)-linked oxidoreductase superfamily protein	K1
347	VIT_205s0062g01080	46.5132	39.9706	33.4868	40.8364	42.1935	39.5046	45.2791	52.8661	38074354	VIT_205s0062g01080.1	VIT_205s0062g01080.1	PF01398	PTHR10410,PTHR10410:SF3	KOG1560		K03247	GO:0005515,GO:0005852,GO:0005737,GO:0003743	AT1G10840.1	TIF3H1	translation initiation factor 3 subunit H1	K1
348	VIT_205s0062g01190	18.1497	9.94248	8.99331	20.1526	61.2677	16.3642	12.3032	62.327	38073008	VIT_205s0062g01190.1	VIT_205s0062g01190.1	PF02678,PF05726	PTHR13903,PTHR13903:SF5					AT2G43120.1		RmlC-like cupins superfamily protein	K1
349	VIT_205s0062g01370	20.5739	19.2146	19.6345	19.3937	15.054	18.2003	18.4196	21.7546	38072038	VIT_205s0062g01370.1	VIT_205s0062g01370.1	PF00026	PTHR13683,PTHR13683:SF288	KOG1339	3.4.23.12		GO:0006508,GO:0004190	AT1G05840.1		Eukaryotic aspartyl protease family protein	K1
350	VIT_205s0077g00500	5.23609	1.75254	0.293407	0.816752	28.3257	5.9629	1.23803	21.6388	38071844	VIT_205s0077g00500.1	VIT_205s0077g00500.1	PF00249	PTHR10641,PTHR10641:SF623			K09422		AT3G06490.1	AtMYB108,BOS1,MYB108	myb domain protein 108	K1
351	VIT_205s0077g00510	56.5358	25.502	13.204	12.0145	252.183	58.6993	56.0392	375.337	38074156	VIT_205s0077g00510.1	VIT_205s0077g00510.1	PF12899	PTHR31916,PTHR31916:SF9				GO:0033926	AT3G06500.1		Plant neutral invertase family protein	K1
352	VIT_205s0077g00550	24.6444	23.2936	26.3125	25.6872	22.6415	27.4551	19.8746	31.7496	38071948	VIT_205s0077g00550.1	VIT_205s0077g00550.1	PF00232	PTHR10353,PTHR10353:SF33	KOG0626	3.2.1.21		GO:0005975,GO:0004553	AT3G06510.1	ATSFR2,SFR2	Glycosyl hydrolase superfamily protein	K1
353	VIT_205s0077g00635	36.666	9.70658	1.54821	17.1205	211.992	41.816	24.6261	115.5	38071870	VIT_205s0077g00635.1	VIT_205s0077g00635.1		PTHR33726,PTHR33726:SF1					AT5G49525.1			K1
354	VIT_205s0077g00830	11.3906	19.1908	18.4585	13.489	15.5135	10.9986	12.5758	18.3796	38072203	VIT_205s0077g00830.1	VIT_205s0077g00830.1	PF00481	PTHR13832,PTHR13832:SF325	KOG0700	3.1.3.16	K01102	GO:0003824,GO:0006470,GO:0004722	AT3G17090.1		Protein phosphatase 2C family protein	K1
355	VIT_205s0077g01090	9.34328	14.9785	11.1966	8.74223	11.3963	13.8218	11.575	15.5051	38072019	VIT_205s0077g01090.1	VIT_205s0077g01090.1	PF01657,PF00069	PTHR27002,PTHR27002:SF46	KOG1187	2.7.11.1		GO:0006468,GO:0005524,GO:0004672	AT1G70520.1	CRK2	cysteine-rich RLK (RECEPTOR-like protein kinase) 2	K1
356	VIT_205s0077g01160	11.0795	9.08937	9.34949	12.0511	13.2568	10.5638	12.8005	15.2193	38074346	VIT_205s0077g01160.1	VIT_205s0077g01160.1	PF00439	PTHR16266			K11797	GO:0005515	AT5G49430.1		WD40/YVTN repeat-like-containing domain;Bromodomain	K1
357	VIT_205s0077g01180	63.9179	77.1016	68.9471	69.5657	95.0903	68.6005	64.4271	120.957	38073664	VIT_205s0077g01180.1	VIT_205s0077g01180.1	PF13917	PTHR13491					AT5G49400.1		zinc knuckle (CCHC-type) family protein	K1
358	VIT_205s0077g01200	30.2002	34.1584	31.697	32.1091	42.5104	31.9376	36.4664	59.5691	38073427	VIT_205s0077g01200.1	VIT_205s0077g01200.1	PF04802	PTHR23318,PTHR23318:SF0	KOG2175		K17491		AT3G06670.1		binding	K1
359	VIT_205s0077g01350	14.4479	20.6418	18.0179	15.1173	13.7997	15.1005	13.5752	18.5594	38073262	VIT_205s0077g01350.1	VIT_205s0077g01350.1	PF08969,PF01398	PTHR12947,PTHR12947:SF4	KOG2880	3.4.19.12	K11866	GO:0005515	AT4G16144.1	AMSH3	associated molecule with the SH3 domain of STAM 3	K1
360	VIT_205s0077g01710	16.4569	12.9456	9.26659	11.8655	27.7143	13.9364	12.8022	31.445	38071969	VIT_205s0077g01710.1	VIT_205s0077g01710.1	PF00400,PF04003	PTHR22847,PTHR22847:SF361	KOG4547		K14546	GO:0005515	AT5G11240.1		transducin family protein / WD-40 repeat family protein	K1
361	VIT_205s0077g01850	11.766	19.6017	21.0255	20.6008	79.3845	12.6124	10.9754	52.2713	38073684	VIT_205s0077g01850.1	VIT_205s0077g01850.1		PTHR36751,PTHR36751:SF1					AT3G06780.1		glycine-rich protein	K1
362	VIT_205s0077g01870	43.0331	31.6832	31.0005	34.5456	47.7192	30.705	27.4242	60.1543	38072802	VIT_205s0077g01870.1	VIT_205s0077g01870.1	PF13414	PTHR22904,PTHR22904:SF169					AT3G16760.1		Tetratricopeptide repeat (TPR)-like superfamily protein	K1
363	VIT_205s0094g00340	31.9213	44.5996	23.5649	27.2256	115.656	54.3525	15.4695	97.9357	38071759	VIT_205s0094g00340.1	VIT_205s0094g00340.1	PF00187,PF00182	PTHR22595,PTHR22595:SF37	KOG4742	3.2.1.14	K01183	GO:0008061,GO:0016998,GO:0006032,GO:0004568	AT3G54420.1	ATCHITIV,ATEP3,CHIV,EP3	homolog of carrot EP3-3 chitinase	K1
364	VIT_205s0094g00770	3.43067	1.94107	5.45992	4.15552	3.64356	3.49553	4.69475	6.52294	38074438	VIT_205s0094g00770.1	VIT_205s0094g00770.1	PF08659,PF00106	PTHR24322,PTHR24322:SF230	KOG1208			GO:0016491,GO:0008152	AT3G59710.1		NAD(P)-binding Rossmann-fold superfamily protein	K1
365	VIT_205s0094g00850	23.7906	19.8719	21.0731	23.5143	21.4749	22.9765	27.8312	35.8674	38074109	VIT_205s0094g00850.1	VIT_205s0094g00850.1	PF00397,PF02383	PTHR11200,PTHR11200:SF119				GO:0005515,GO:0042578	AT3G59770.1	SAC9	sacI homology domain-containing protein / WW domain-containing protein	K1
366	VIT_205s0094g00966	10.5948	22.2395	5.41227	1.60616	16.1778	12.1575	4.29215	20.5864	38072375	VIT_205s0094g00966.1	VIT_205s0094g00966.1	PF00071	PTHR24073,PTHR24073:SF525				GO:0007264,GO:0005525	AT1G02130.1	ARA-5,ARA5,ATRAB1B,ATRABD2A,RA-5,RABD2A	RAS 5	K1
367	VIT_205s0094g01070	27.1598	21.4926	21.2949	26.6273	28.4697	27.3245	25.4149	31.0564	38071809	VIT_205s0094g01070.1	VIT_205s0094g01070.1	PF07766	PTHR14009,PTHR14009:SF12	KOG1043		K17800		AT3G59820.1		LETM1-like protein	K1
368	VIT_205s0102g00130	138.236	35.7345	55.5558	62.756	334.409	162.488	100.385	221.73	38074371	VIT_205s0102g00130.1	VIT_205s0102g00130.1	PF07939	PTHR31865,PTHR31865:SF0					AT2G31560.2		Protein of unknown function (DUF1685)	K1
369	VIT_205s0102g00330	2.55482	3.52002	1.36913	5.66386	6.04782	1.70727	3.06036	5.5319	38073866	VIT_205s0102g00330.1	VIT_205s0102g00330.1		PTHR11042,PTHR11042:SF96					AT3G59410.2	GCN2	protein kinase family protein	K1
370	VIT_205s0102g00360	6.33065	7.03242	8.89854	7.83982	6.18114	4.46982	6.23303	7.84849	38072516	VIT_205s0102g00360.1	VIT_205s0102g00360.1	PF13393	PTHR11042,PTHR11042:SF96	KOG1936	2.7.11.1	K16196		AT3G59410.2	GCN2	protein kinase family protein	K1
371	VIT_205s0124g00250	6.52406	5.58764	5.38004	5.53637	6.54515	5.07186	6.29176	7.32684	38071929	VIT_205s0124g00250.1	VIT_205s0124g00250.1	PF13831,PF05964,PF05965,PF00856,PF00855,PF13771	PTHR13793,PTHR13793:SF100		2.1.1.43		GO:0005634,GO:0005515	AT1G05830.1	ATX2,SDG30	trithorax-like protein 2	K1
372	VIT_205s0124g00270	9.39481	11.2759	7.10194	8.13336	7.80919	9.43017	7.28851	9.71258	38072574	VIT_205s0124g00270.1	VIT_205s0124g00270.1		PTHR13343,PTHR13343:SF18					AT3G59300.1		Pentatricopeptide repeat (PPR) superfamily protein	K1
373	VIT_206s0004g00030	2.22602	1.66852	0.679793	1.27688	3.25841	1.79601	1.79043	3.35596	38062307	VIT_206s0004g00030.1	VIT_206s0004g00030.1	PF03492	PTHR31009,PTHR31009:SF17		2.1.1.275,2.1.1.276	K18886	GO:0008168	AT5G56300.1	GAMT2	gibberellic acid methyltransferase 2	K1
374	VIT_206s0004g00090	9.478	9.81674	11.7023	11.5515	10.2568	9.78963	12.3422	14.1732	38061343	VIT_206s0004g00090.1	VIT_206s0004g00090.1		PTHR34418,PTHR34418:SF1			K14317		AT1G55540.1	emb1011	Nuclear pore complex protein	K1
375	VIT_206s0004g00130	6.07166	2.66232	1.78457	0.861092	22.171	3.09971	4.49254	35.5597	38061820	VIT_206s0004g00130.1	VIT_206s0004g00130.1	PF02887,PF00224	PTHR11817,PTHR11817:SF5		2.7.1.40	K00873	GO:0030955,GO:0006096,GO:0004743,GO:0000287	AT5G56350.1		Pyruvate kinase family protein	K1
376	VIT_206s0004g00160	21.8583	21.7789	16.2845	8.93993	24.4776	25.5058	30.073	35.9301	38060919	VIT_206s0004g00160.1	VIT_206s0004g00160.1		PTHR10759,PTHR10759:SF2				GO:0006412,GO:0005840,GO:0005622,GO:0003735	AT3G01170.1		Ribosomal protein L34e superfamily protein	K1
377	VIT_206s0004g00450	18.6342	16.8092	20.662	19.8823	15.3771	18.1616	20.0488	21.4315	38060906	VIT_206s0004g00450.1	VIT_206s0004g00450.1	PF06333	PTHR10791,PTHR10791:SF60			K15164	GO:0016592,GO:0006357,GO:0001104	AT1G55325.2	GCT	RNA polymerase II transcription mediators	K1
378	VIT_206s0004g00500	42.4199	38.4578	38.495	37.509	47.8005	39.6498	44.1765	55.0969	38063646	VIT_206s0004g00500.1	VIT_206s0004g00500.1	PF02985,PF13646	PTHR10527,PTHR10527:SF29				GO:0005515	AT5G19820.1	emb2734	ARM repeat superfamily protein	K1
379	VIT_206s0004g01010	24.8339	27.2595	6.65336	3.40238	104.312	18.8054	6.82645	131.431	38061490	VIT_206s0004g01010.1	VIT_206s0004g01010.1	PF03018	PTHR21495,PTHR21495:SF77					AT1G58170.1		Disease resistance-responsive (dirigent-like protein) family protein	K1
380	VIT_206s0004g01135	0	0	0.379586	0	7.31601	0.743191	0	10.6351	38061534	VIT_206s0004g01135.1	VIT_206s0004g01135.1		PTHR34268,PTHR34268:SF2					AT2G31945.1			K1
381	VIT_206s0004g01200	24.2175	25.4091	26.1514	28.1237	23.8254	20.4916	25.24	28.6071	38061602	VIT_206s0004g01200.1	VIT_206s0004g01200.1	PF14288,PF02364	PTHR12741,PTHR12741:SF12		2.4.1.34	K11000	GO:0016020,GO:0006075,GO:0003843,GO:0000148	AT3G07160.1	ATGSL10,CALS9,gsl10	glucan synthase-like 10	K1
382	VIT_206s0004g01350	30.7345	43.4377	29.8189	28.0732	73.3099	25.4099	28.9129	75.2461	38062115	VIT_206s0004g01350.1	VIT_206s0004g01350.1	PF03735	PTHR33432,PTHR33432:SF3	KOG4675				AT5G13020.1		Emsy N Terminus (ENT)/ plant Tudor-like domains-containing protein	K1
383	VIT_206s0004g01720	9.58361	7.46433	8.13482	11.6423	11.1915	8.62391	5.66242	19.9383	38062508	VIT_206s0004g01720.1	VIT_206s0004g01720.1		PTHR33984,PTHR33984:SF2					AT4G12070.1			K1
384	VIT_206s0004g02410	21.9141	29.2937	23.5764	20.0413	207.096	21.971	17.9194	269.88	38061486	VIT_206s0004g02410.1	VIT_206s0004g02410.1	PF01513	PTHR20275,PTHR20275:SF0	KOG2178	2.7.1.23,2.7.1.86	K00858	GO:0008152,GO:0006741,GO:0003951	AT3G21070.2	ATNADK-1,NADK1	NAD kinase 1	K1
385	VIT_206s0004g02600	2.41291	1.89249	2.2867	3.44393	4.35965	2.45737	3.10881	4.71464	38063049	VIT_206s0004g02600.1	VIT_206s0004g02600.1	PF00271,PF00176,PF00385	PTHR10799,PTHR10799:SF620	KOG0383	3.6.4.12	K11643	GO:0005524	AT1G08060.1	MOM,MOM1	ATP-dependent helicase family protein	K1
386	VIT_206s0004g02610	9.36304	9.40979	9.59114	9.48172	11.7764	9.15268	9.91277	11.706	38063483	VIT_206s0004g02610.1	VIT_206s0004g02610.1		PTHR35116,PTHR35116:SF2					AT1G08060.2	MOM,MOM1	ATP-dependent helicase family protein	K1
387	VIT_206s0004g02730	13.1797	8.62777	8.7811	10.1344	20.4763	9.74966	9.01048	16.7444	38062077	VIT_206s0004g02730.1	VIT_206s0004g02730.1	PF00685	PTHR12812,PTHR12812:SF0		2.8.2.20		GO:0008146,GO:0016021	AT1G08030.1	TPST	tyrosylprotein sulfotransferase	K1
388	VIT_206s0004g03370	9.68334	13.2813	9.87922	8.25846	27.9085	11.4703	12.1317	43.5616	38061574	VIT_206s0004g03370.1	VIT_206s0004g03370.1	PF02121	PTHR10658	KOG3668			GO:0006810,GO:0005622				K1
389	VIT_206s0004g03615	11.4535	0	2.7061	3.7226	40.5207	7.61516	7.80614	30.3916	38062816	VIT_206s0004g03615.1	VIT_206s0004g03615.1										K1
390	VIT_206s0004g03670	42.3556	54.2438	24.9267	27.4053	105.348	54.7752	40.3445	109.736	38062197	VIT_206s0004g03670.1	VIT_206s0004g03670.1	PF00069	PTHR27001,PTHR27001:SF63	KOG1187	2.7.11.1		GO:0006468,GO:0005524,GO:0004672	AT1G07870.2		Protein kinase superfamily protein	K1
391	VIT_206s0004g03730	8.90847	5.09198	7.63993	11.2273	15.2369	7.0248	7.47922	12.5275	38063247	VIT_206s0004g03730.1	VIT_206s0004g03730.1	PF04998	PTHR19376,PTHR19376:SF32		2.7.7.6		GO:0006351,GO:0003899,GO:0003677	AT5G60040.1	NRPC1	nuclear RNA polymerase C1	K1
392	VIT_206s0004g03740	5.1215	3.75899	3.49669	4.40203	7.92042	4.15548	4.44585	7.37351	38062064	VIT_206s0004g03740.1	VIT_206s0004g03740.1	PF05000,PF04983,PF04998,PF00623,PF04997	PTHR19376,PTHR19376:SF32		2.7.7.6	K03018	GO:0006351,GO:0003899,GO:0003677	AT5G60040.1	NRPC1	nuclear RNA polymerase C1	K1
393	VIT_206s0004g03980	1.09983	0.485388	0.192053	0.122131	1.63134	0.681413	0.747694	1.40471	38062107	VIT_206s0004g03980.1	VIT_206s0004g03980.1	PF13962,PF12796	PTHR24186,PTHR24186:SF4	KOG0502,KOG0508,KOG4412				AT1G07710.1		Ankyrin repeat family protein	K1
394	VIT_206s0004g04010	274.919	125.864	47.4027	42.8068	589.566	301.019	327.162	466.827	38061472	VIT_206s0004g04010.1	VIT_206s0004g04010.1	PF03081	PTHR12542,PTHR12542:SF17			K07195	GO:0006887,GO:0000145	AT2G39380.1	ATEXO70H2,EXO70H2	exocyst subunit exo70 family protein H2	K1
395	VIT_206s0004g04350	6.10262	6.17963	5.64708	5.63224	15.1205	5.31384	7.11741	18.4029	38062371	VIT_206s0004g04350.1	VIT_206s0004g04350.1							AT5G59960.1			K1
396	VIT_206s0004g04480	54.812	20.977	13.7658	12.0182	53.4045	56.1178	54.494	77.6426	38062226	VIT_206s0004g04480.1	VIT_206s0004g04480.1		PTHR33981,PTHR33981:SF1					AT2G37570.1	SLT1	HSP20-like chaperones superfamily protein	K1
397	VIT_206s0004g04500	13.0071	15.8426	26.9686	5.4809	19.3175	3.84451	6.23821	21.8679	38061556	VIT_206s0004g04500.1	VIT_206s0004g04500.1	PF16860	PTHR28066,PTHR28066:SF1					AT1G47278.2			K1
398	VIT_206s0004g04850	3.90916	7.61749	1.84046	2.19183	7.04465	5.76502	3.88428	10.7817	38063062	VIT_206s0004g04850.1	VIT_206s0004g04850.1	PF03470,PF03468,PF03469	PTHR21596,PTHR21596:SF23				GO:0031047	AT3G48670.1	IDN2,RDM12	XH/XS domain-containing protein	K1
399	VIT_206s0004g04940	10.5526	20.2094	24.4537	25.8153	53.2174	16.4411	19.1774	58.196	38063003	VIT_206s0004g04940.1	VIT_206s0004g04940.1		PTHR21717,PTHR21717:SF9					AT1G07540.1	TRFL2	TRF-like 2	K1
400	VIT_206s0004g04980	45.5241	44.1646	54.3688	53.362	47.6032	37.3863	49.3194	77.615	38061698	VIT_206s0004g04980.1	VIT_206s0004g04980.1	PF03514	PTHR31636,PTHR31636:SF46					AT1G07530.1	ATGRAS2,GRAS2,SCL14	SCARECROW-like 14	K1
401	VIT_206s0004g05080	2.09885	3.48532	2.57107	2.49374	4.82934	3.34578	5.26819	5.63425	38063661	VIT_206s0004g05080.1	VIT_206s0004g05080.1	PF13639	PTHR22763,PTHR22763:SF30			K16283	GO:0008270,GO:0005515	AT3G55530.1	SDIR1	RING/U-box superfamily protein	K1
402	VIT_206s0004g05490	18.7432	18.1454	21.0967	22.0846	20.2247	20.7949	17.3991	23.9287	38062750	VIT_206s0004g05490.1	VIT_206s0004g05490.1							AT5G59210.1		myosin heavy chain-related	K1
403	VIT_206s0004g05700	9.57024	15.583	12.4576	9.49873	21.6566	21.7366	10.5741	32.2668	38062595	VIT_206s0004g05700.1	VIT_206s0004g05700.1	PF00043,PF13417	PTHR11260,PTHR11260:SF303	KOG0406	2.5.1.18	K00799	GO:0005515	AT2G29420.1	ATGSTU7,GST25,GSTU7	glutathione S-transferase tau 7	K1
404	VIT_206s0004g05970	7.04456	7.92757	8.49308	7.71526	7.81231	6.91078	7.88305	8.77003	38061055	VIT_206s0004g05970.1	VIT_206s0004g05970.1	PF00271,PF00270,PF13234,PF08148	PTHR12131,PTHR12131:SF4		3.6.4.13	K12599	GO:0005524,GO:0003676	AT3G46960.1		RNA helicase, ATP-dependent, SK12/DOB1 protein	K1
405	VIT_206s0004g06290	106.36	44.4914	80.2721	133.604	231.511	74.3327	62.3517	177.7	38061629	VIT_206s0004g06290.1	VIT_206s0004g06290.1	PF13432	PTHR26312,PTHR26312:SF87					AT2G29670.1		Tetratricopeptide repeat (TPR)-like superfamily protein	K1
406	VIT_206s0004g06480	20.7815	5.80842	10.3502	16.5789	22.1733	11.6526	3.78981	28.8706	38063201	VIT_206s0004g06480.1	VIT_206s0004g06480.1	PF00067	PTHR24298,PTHR24298:SF144				GO:0055114,GO:0020037,GO:0016705,GO:0005506	AT3G26300.1	CYP71B34	cytochrome P450, family 71, subfamily B, polypeptide 34	K1
407	VIT_206s0004g07490	0.380352	0.677511	0.287659	0.064032	6.53317	2.12463	1.82117	10.405	38063626	VIT_206s0004g07490.1	VIT_206s0004g07490.1	PF05050,PF08241	PTHR10108,PTHR10108:SF885				GO:0008168,GO:0008152	AT5G01710.1		methyltransferases	K1
408	VIT_206s0004g07570	13.671	18.6941	19.9499	17.5037	18.4646	14.8577	19.543	20.57	38062128	VIT_206s0004g07570.1	VIT_206s0004g07570.1	PF13639	PTHR12389	KOG0803			GO:0008270,GO:0005515	AT5G58410.1		HEAT/U-box domain-containing protein	K1
409	VIT_206s0004g07630	6.30217	3.8874	2.18857	4.19111	21.0149	5.95905	3.95093	20.6514	38063217	VIT_206s0004g07630.1	VIT_206s0004g07630.1	PF04525	PTHR31087,PTHR31087:SF16					AT2G30270.1		Protein of unknown function (DUF567)	K1
410	VIT_206s0004g07830	24.1089	27.6732	26.2979	28.2536	32.7542	25.3775	23.0007	41.3145	38061778	VIT_206s0004g07830.1	VIT_206s0004g07830.1	PF14531,PF03822	PTHR24347,PTHR24347:SF167	KOG0583	2.7.11.1	K07198	GO:0007165	AT5G58380.1	CIPK10,PKS2,SIP1,SNRK3.8	SOS3-interacting protein 1	K1
411	VIT_206s0004g07990	10.2251	13.1866	12.286	13.2599	10.5348	8.97031	12.2097	14.6566	38061619	VIT_206s0004g07990.1	VIT_206s0004g07990.1	PF05193,PF00675,PF16187	PTHR11851,PTHR11851:SF123		3.4.24.56	K01411		AT1G06900.1		Insulinase (Peptidase family M16) family protein	K1
412	VIT_206s0004g08170	11.2089	13.9864	7.40591	7.35065	12.515	10.2837	9.209	18.7294	38061689	VIT_206s0004g08170.1	VIT_206s0004g08170.1	PF07765	PTHR32258,PTHR32258:SF4					AT5G58320.1		Kinase interacting (KIP1-like) family protein	K1
413	VIT_206s0004g08330	10.3592	4.53931	4.45516	7.56345	19.2447	10.0864	11.7155	15.1886	38061435	VIT_206s0004g08330.1	VIT_206s0004g08330.1		PTHR22881,PTHR22881:SF17								K1
414	VIT_206s0009g00960	31.2629	35.1487	36.6867	38.1063	29.2635	29.8439	31.0742	39.2923	38063150	VIT_206s0009g00960.1	VIT_206s0009g00960.1	PF00443,PF14533,PF12436	PTHR24006,PTHR24006:SF445		3.4.19.12		GO:0036459,GO:0016579	AT3G11910.1	UBP13	ubiquitin-specific protease 13	K1
415	VIT_206s0009g01060	7.39303	6.50677	6.82739	7.44153	6.51062	6.15477	7.59731	10.2563	38063315	VIT_206s0009g01060.1	VIT_206s0009g01060.1	PF00069	PTHR22974,PTHR22974:SF23	KOG1151	2.7.11.1	K08864	GO:0006468,GO:0005524,GO:0004672	AT5G20930.1	TSL	Protein kinase superfamily protein	K1
416	VIT_206s0009g01600	28.1647	25.1533	29.0793	30.4982	25.3001	29.9482	32.2736	34.033	38061950	VIT_206s0009g01600.1	VIT_206s0009g01600.1	PF04783,PF04782	PTHR21450,PTHR21450:SF6					AT2G27090.1		Protein of unknown function (DUF630 and DUF632)	K1
417	VIT_206s0009g01720	6.72661	6.2302	5.84138	7.76302	7.57223	6.52842	6.17818	9.72019	38061664	VIT_206s0009g01720.1	VIT_206s0009g01720.1	PF01150	PTHR11782,PTHR11782:SF51	KOG1386	3.6.1.5	K01510	GO:0016787	AT2G02970.1		GDA1/CD39 nucleoside phosphatase family protein	K1
418	VIT_206s0009g01750	10.4346	9.25552	9.38271	11.1219	8.77102	11.6639	12.3784	11.2139	38061366	VIT_206s0009g01750.1	VIT_206s0009g01750.1	PF00271,PF00270,PF08148,PF13234			3.6.4.13	K12598	GO:0005524,GO:0003676	AT1G59760.1		RNA helicase, ATP-dependent, SK12/DOB1 protein	K1
419	VIT_206s0009g01810	9.70231	11.8852	8.39886	10.1794	9.40043	10.1577	6.63989	11.1142	38060908	VIT_206s0009g01810.1	VIT_206s0009g01810.1	PF07714	PTHR27001,PTHR27001:SF99	KOG1187	2.7.11.1	K04733	GO:0006468,GO:0004672	AT1G14370.1	APK2A,PBL2	protein kinase 2A	K1
420	VIT_206s0009g02340	18.2014	22.5296	25.198	23.2562	17.6299	17.8885	21.6946	25.3576	38062539	VIT_206s0009g02340.1	VIT_206s0009g02340.1	PF03222	PTHR35294,PTHR35294:SF1	KOG1305			GO:0003333	AT5G19500.1		Tryptophan/tyrosine permease	K1
421	VIT_206s0009g02510	12.6727	16.6708	16.7511	16.4984	15.0527	13.7285	19.3585	17.0339	38061390	VIT_206s0009g02510.1	VIT_206s0009g02510.1	PF13001	PTHR23346,PTHR23346:SF19			K11886		AT2G26780.1		ARM repeat superfamily protein	K1
422	VIT_206s0009g03750	26.5803	28.2704	28.4078	27.6711	36.1816	24.863	29.4338	41.1758	38062586	VIT_206s0009g03750.1	VIT_206s0009g03750.1	PF04851,PF13907,PF00385,PF00271	PTHR10799,PTHR10799:SF70		3.6.4.12	K11367	GO:0016787,GO:0005524,GO:0003677	AT2G13370.1	CHR5	chromatin remodeling 5	K1
423	VIT_206s0009g03810	19.0799	17.5586	20.7191	18.8155	18.8133	18.0441	17.9614	21.6578	38061423	VIT_206s0009g03810.1	VIT_206s0009g03810.1	PF02854,PF09090,PF09088	PTHR12412			K12882	GO:0005515,GO:0003723,GO:0016070,GO:0051028,GO:0045292,GO:0005846,GO:0000339	AT2G13540.1	ABH1,ATCBP80,CBP80,ENS	ARM repeat superfamily protein	K1
424	VIT_206s0061g00280	3.99848	2.08467	2.68371	3.10643	6.49983	2.8506	2.32707	5.58436	38061202	VIT_206s0061g00280.1	VIT_206s0061g00280.1	PF13207	PTHR33477,PTHR33477:SF3					AT5G60760.1		P-loop containing nucleoside triphosphate hydrolases superfamily protein	K1
425	VIT_206s0061g00570	0.372926	0	0.119676	0	1.12318	0.578392	0.389655	1.3141	38062198	VIT_206s0061g00570.1	VIT_206s0061g00570.1	PF03222	PTHR22950,PTHR22950:SF280			K15015	GO:0003333	AT3G28960.1		Transmembrane amino acid transporter family protein	K1
426	VIT_206s0061g00900	15.1222	19.1664	18.0266	18.904	15.3999	18.1038	20.1359	21.4263	38062255	VIT_206s0061g00900.1	VIT_206s0061g00900.1	PF10474,PF10475	PTHR13258,PTHR13258:SF0	KOG2939				AT2G27900.1			K1
427	VIT_206s0061g00940	13.7123	14.2213	16.8191	17.2	15.1775	15.8173	18.4264	17.7169	38062624	VIT_206s0061g00940.1	VIT_206s0061g00940.1	PF00637	PTHR12616				GO:0016192,GO:0006886	AT1G08190.1	ATVAM2,ATVPS41,VAM2,VPS41,ZIP2	vacuolar protein sorting 41	K1
428	VIT_206s0061g00960	0.114162	0	0	0	0.839698	0.292001	0.731545	1.01727	38063674	VIT_206s0061g00960.1	VIT_206s0061g00960.1	PF05577	PTHR11010,PTHR11010:SF40		3.4.16.2	K01285	GO:0008236,GO:0006508	AT5G22860.1		Serine carboxypeptidase S28 family protein	K1
429	VIT_206s0061g01030	23.2515	17.2378	13.9194	15.6256	27.1552	22.5534	21.6949	44.807	38062267	VIT_206s0061g01030.1	VIT_206s0061g01030.1	PF00026	PTHR13683,PTHR13683:SF348	KOG1339	3.4.23.12		GO:0006508,GO:0004190	AT5G22850.1		Eukaryotic aspartyl protease family protein	K1
430	VIT_206s0061g01210	57.5011	79.2062	76.3647	72.7019	69.9244	77.7417	66.5716	92.1905	38061403	VIT_206s0061g01210.1	VIT_206s0061g01210.1	PF01490	PTHR22950,PTHR22950:SF319	KOG1303				AT1G08230.2	ATGAT1,GAT1	Transmembrane amino acid transporter family protein	K1
431	VIT_206s0061g01390	160.906	44.5442	4.49675	1.7719	534.95	211.176	316.222	642.564	38063632	VIT_206s0061g01390.1	VIT_206s0061g01390.1	PF00847	PTHR31985,PTHR31985:SF27				GO:0006355,GO:0003700	AT5G51990.1	CBF4,DREB1D	C-repeat-binding factor 4	K1
432	VIT_206s0061g01490	0.48326	0.891899	0.43086	0.305262	0.920957	1.08983	0.38206	1.02574	38062517	VIT_206s0061g01490.1	VIT_206s0061g01490.1	PF14510,PF08370,PF00005,PF01061	PTHR19241,PTHR19241:SF261		3.6.3.34		GO:0016887,GO:0005524,GO:0016020	AT2G36380.1	ATPDR6,PDR6	pleiotropic drug resistance 6	K1
433	VIT_206s0080g00170	1.00071	0.911852	0.489203	0.524851	2.32113	1.46825	1.25074	3.87641	38061588	VIT_206s0080g00170.1	VIT_206s0080g00170.1	PF13515	PTHR31086,PTHR31086:SF8				GO:0015743	AT1G08440.1		Aluminium activated malate transporter family protein	K1
434	VIT_206s0080g00360	4.92834	4.7295	4.25399	3.22739	8.14319	7.98829	10.1761	15.0533	38062981	VIT_206s0080g00360.1	VIT_206s0080g00360.1	PF00170,PF14144	PTHR22952,PTHR22952:SF179			K14431	GO:0043565,GO:0006355,GO:0003700,GO:0006351	AT1G08320.1	bZIP21,TGA9	bZIP transcription factor family protein	K1
435	VIT_206s0080g00450	102.875	121.449	16.6226	9.55913	671.148	148.795	129.942	448.206	38061196	VIT_206s0080g00450.1	VIT_206s0080g00450.1	PF13202,PF13405	PTHR10183,PTHR10183:SF299	KOG0037		K13448	GO:0005509	AT2G27480.1		Calcium-binding EF-hand family protein	K1
436	VIT_206s0080g00830	18.4365	15.5576	12.7618	13.301	15.4863	18.6964	16.4482	20.1458	38063300	VIT_206s0080g00830.1	VIT_206s0080g00830.1	PF06258	PTHR33986,PTHR33986:SF3					AT5G22350.1	ELM1	Protein of unknown function (DUF1022)	K1
437	VIT_206s0080g00880	26.3876	31.1465	26.7451	29.8484	29.9164	28.2009	41.3965	36.841	38063292	VIT_206s0080g00880.1	VIT_206s0080g00880.1	PF05450	PTHR31826				GO:0016485,GO:0016021	AT3G44330.1			K1
438	VIT_206s0080g01020	0.658697	0.117702	0.114178	0	3.57693	2.40039	0.100198	5.17573	38062312	VIT_206s0080g01020.1	VIT_206s0080g01020.1	PF08659	PTHR24322,PTHR24322:SF600	KOG0725	1.1.1.198			AT3G51680.1		NAD(P)-binding Rossmann-fold superfamily protein	K1
439	VIT_207s0005g00030	1269.91	224.386	171.314	543.85	2340.56	1305.83	1053.41	1697.61	38057927	VIT_207s0005g00030.1	VIT_207s0005g00030.1	PF00043,PF02798	PTHR11260,PTHR11260:SF201	KOG0867	2.5.1.18	K00799	GO:0005515	AT2G47730.1	ATGSTF5,ATGSTF8,GST6,GSTF8	glutathione S-transferase phi 8	K1
440	VIT_207s0005g00220	3.262	4.42995	5.62428	3.64568	4.24065	2.44159	4.29736	4.76157	38057777	VIT_207s0005g00220.1	VIT_207s0005g00220.1	PF13589,PF01119	PTHR10073,PTHR10073:SF12			K10858	GO:0030983,GO:0006298,GO:0005524,GO:0032300	AT4G02460.1	PMS1	DNA mismatch repair protein, putative	K1
441	VIT_207s0005g00270	27.3664	16.7716	18.6854	20.6352	25.5391	20.6073	17.9903	31.5854	38055481	VIT_207s0005g00270.1	VIT_207s0005g00270.1	PF09420	PTHR13243	KOG4771		K14839		AT1G02870.1			K1
442	VIT_207s0005g00300	4.58358	3.30664	2.60252	2.41583	18.9951	3.24975	4.02677	37.887	38056587	VIT_207s0005g00300.1	VIT_207s0005g00300.1	PF00642,PF00270,PF00271	PTHR18934,PTHR18934:SF129	KOG0920	3.6.4.13		GO:0046872,GO:0005524,GO:0003676	AT2G47680.1		zinc finger (CCCH type) helicase family protein	K1
443	VIT_207s0005g00610	2.70312	2.3461	2.7923	2.19697	2.25198	2.86224	2.81121	2.87056	38056378	VIT_207s0005g00610.1	VIT_207s0005g00610.1	PF04130	PTHR19302,PTHR19302:SF27			K16571	GO:0005815,GO:0000922,GO:0000226	AT3G53760.1	ATGCP4,GCP4	GAMMA-TUBULIN COMPLEX PROTEIN 4	K1
444	VIT_207s0005g00620	28.4961	15.4255	16.985	23.8375	29.6663	25.1375	23.3318	31.9217	38055621	VIT_207s0005g00620.1	VIT_207s0005g00620.1	PF04615	PTHR14150,PTHR14150:SF12	KOG2172		K14567	GO:0032040,GO:0006364	AT4G02400.1		U3 ribonucleoprotein (Utp) family protein	K1
445	VIT_207s0005g00670	72.7901	54.8092	53.7046	58.3872	120.131	69.5545	53.541	193.711	38055769	VIT_207s0005g00670.1	VIT_207s0005g00670.1	PF04398	PTHR31676,PTHR31676:SF27					AT4G02370.1		Protein of unknown function, DUF538	K1
446	VIT_207s0005g00680	24.9591	33.4493	23.3203	21.389	42.3567	25.5875	30.0824	66.6344	38056882	VIT_207s0005g00680.1	VIT_207s0005g00680.1	PF04091	PTHR12702,PTHR12702:SF1				GO:0006904,GO:0000145	AT4G02350.1	SEC15B	exocyst complex component sec15B	K1
447	VIT_207s0005g00820	66.2564	100.14	20.2244	15.0707	156.276	76.8082	100.895	172.049	38057274	VIT_207s0005g00820.1	VIT_207s0005g00820.1	PF00847	PTHR31190,PTHR31190:SF27			K09286	GO:0006355,GO:0003700	AT3G16770.1	ATEBP,EBP,ERF72,RAP2.3	ethylene-responsive element binding protein	K1
448	VIT_207s0005g01710	5.02048	5.28272	5.14181	3.55761	10.2825	4.543	4.60875	18.5034	38057851	VIT_207s0005g01710.1	VIT_207s0005g01710.1	PF03106	PTHR31221,PTHR31221:SF13				GO:0043565,GO:0006355,GO:0003700	AT2G47260.1	ATWRKY23,WRKY23	WRKY DNA-binding protein 23	K1
449	VIT_207s0005g01770	64.8858	47.3215	47.6729	52.9041	76.4411	49.9296	47.6579	80.1237	38058188	VIT_207s0005g01770.1	VIT_207s0005g01770.1	PF00270,PF00271,PF07717,PF04408	PTHR18934		3.6.4.13	K12820	GO:0005524,GO:0003676,GO:0004386	AT3G62310.1		RNA helicase family protein	K1
450	VIT_207s0005g02110	467.696	351.002	134.217	77.0798	1137.6	463.357	559.757	1159.44	38057575	VIT_207s0005g02110.1	VIT_207s0005g02110.1	PF00481	PTHR13832,PTHR13832:SF165	KOG0698	3.1.3.16		GO:0003824,GO:0006470,GO:0004722	AT3G62260.2		Protein phosphatase 2C family protein	K1
451	VIT_207s0005g02190	28.5781	28.3808	34.5597	34.0821	41.1805	23.7907	21.1	49.7628	38057445	VIT_207s0005g02190.1	VIT_207s0005g02190.1		PTHR22938,PTHR22938:SF0	KOG2231				AT3G62240.1		RING/U-box superfamily protein	K1
452	VIT_207s0005g02310	0	0	0	0	4.98115	0.0688003	0.215379	3.24423	38056781	VIT_207s0005g02310.1	VIT_207s0005g02310.1	PF03330,PF01357	PTHR31867,PTHR31867:SF34					AT4G01630.1	ATEXP17,ATEXPA17,ATHEXP ALPHA 1.13,EXPA17	expansin A17	K1
453	VIT_207s0005g02730	14.7621	18.9177	34.8587	18.2243	20.6369	20.472	14.7862	32.7846	38058219	VIT_207s0005g02730.1	VIT_207s0005g02730.1	PF00249	PTHR24078,PTHR24078:SF255					AT1G75250.1	ATRL6,RL6,RSM3	RAD-like 6	K1
454	VIT_207s0005g02810	8.02092	10.4178	13.7103	10.5369	10.5808	8.00239	10.0181	11.3255	38055899	VIT_207s0005g02810.1	VIT_207s0005g02810.1	PF14566	PTHR23339,PTHR23339:SF54					AT3G62010.1			K1
455	VIT_207s0005g03300	2.25905	0	1.45212	1.28418	2.81175	1.77045	0.943201	4.19478	38055473	VIT_207s0005g03300.1	VIT_207s0005g03300.1	PF00083	PTHR24064,PTHR24064:SF279				GO:0055085,GO:0022857,GO:0016021	AT3G54700.1	PHT1;7	phosphate transporter 1;7	K1
456	VIT_207s0005g03340	31.9	33.5347	9.11384	7.70998	212.191	52.4527	16.3785	194.271	38058336	VIT_207s0005g03340.1	VIT_207s0005g03340.1	PF00249	PTHR10641,PTHR10641:SF650	KOG0048		K09422		AT2G31180.1	ATMYB14,MYB14,MYB14AT	myb domain protein 14	K1
457	VIT_207s0005g03380	10.9309	6.54825	10.1018	10.4782	10.7839	10.3378	10.9116	13.9326	38056406	VIT_207s0005g03380.1	VIT_207s0005g03380.1	PF04280	PTHR10721,PTHR10721:SF1	KOG2580		K17804		AT2G36070.1	ATTIM44-2,TIM44-2	translocase inner membrane subunit 44-2	K1
458	VIT_207s0005g03430	2.40802	0.0831723	0.388879	0.437549	7.70897	1.35399	2.03327	4.6519	38057354	VIT_207s0005g03430.1	VIT_207s0005g03430.1	PF03765,PF00650	PTHR23324,PTHR23324:SF82	KOG1471				AT1G30690.1		Sec14p-like phosphatidylinositol transfer family protein	K1
459	VIT_207s0005g03440	33.0926	39.0024	37.6942	39.8281	34.8985	33.9	36.9276	49.4289	38055541	VIT_207s0005g03440.1	VIT_207s0005g03440.1	PF02463	PTHR18937,PTHR18937:SF177			K06636		AT3G54670.3	ATSMC1,SMC1,TTN8	Structural maintenance of chromosomes (SMC) family protein	K1
460	VIT_207s0005g03450	21.6456	23.6	21.3302	25.8793	21.1261	20.209	25.4001	32.5442	38056423	VIT_207s0005g03450.1	VIT_207s0005g03450.1	PF06470	PTHR18937,PTHR18937:SF177				GO:0051276,GO:0005694,GO:0005524,GO:0005515	AT3G54670.1	ATSMC1,SMC1,TTN8	Structural maintenance of chromosomes (SMC) family protein	K1
461	VIT_207s0005g03570	7.26139	7.65713	6.56503	5.07232	10.816	5.42849	7.89671	18.6226	38055754	VIT_207s0005g03570.1	VIT_207s0005g03570.1	PF00571,PF01380	PTHR11911,PTHR11911:SF62		5.3.1.13	K06041	GO:0030246,GO:0005975	AT3G54690.1		Sugar isomerase (SIS) family protein	K1
462	VIT_207s0005g04040	0.793002	1.10472	0.991599	0.721111	1.03997	0.79652	0.948223	1.22359	38055498	VIT_207s0005g04040.1	VIT_207s0005g04040.1	PF08263,PF00560,PF00069,PF13855	PTHR27000,PTHR27000:SF44	KOG1187	2.7.11.1		GO:0005515,GO:0006468,GO:0005524,GO:0004672	AT4G08850.1		Leucine-rich repeat receptor-like protein kinase family protein	K1
463	VIT_207s0005g04620	0.360334	0	1.36393	1.40185	4.94061	2.2469	0	4.62446	38057449	VIT_207s0005g04620.1	VIT_207s0005g04620.1	PF05899	PTHR33271,PTHR33271:SF3					AT4G28703.1		RmlC-like cupins superfamily protein	K1
464	VIT_207s0005g04785	10.7906	7.29975	10.9943	12.9498	15.2932	10.5251	11.6431	14.8311	38056073	VIT_207s0005g04785.1	VIT_207s0005g04785.1	PF00063	PTHR13140,PTHR13140:SF256		3.6.4.1		GO:0016459,GO:0005524,GO:0003774	AT1G04600.1	ATXIA,XIA	myosin XI A	K1
465	VIT_207s0005g04790	21.1549	17.7947	17.3638	18.887	18.2509	19.5887	18.4288	22.265	38058329	VIT_207s0005g04790.1	VIT_207s0005g04790.1	PF00612,PF01843,PF00063	PTHR13140,PTHR13140:SF256	KOG1003	3.6.4.1		GO:0005515,GO:0016459,GO:0005524,GO:0003774	AT5G43900.3	ATMYA2,MYA2,XI-2,XI-6	myosin 2	K1
466	VIT_207s0005g05040	1.58543	0.108083	0	0	5.00324	0.827244	1.08625	5.56325	38057122	VIT_207s0005g05040.1	VIT_207s0005g05040.1	PF00072	PTHR24423				GO:0000160	AT5G26594.1	ARR24,RR24	response regulator 24	K1
467	VIT_207s0005g05680	1.68392	0	1.29842	0	2.34981	2.86143	1.30828	3.14898	38056213	VIT_207s0005g05680.1	VIT_207s0005g05680.1	PF13414	PTHR36326,PTHR36326:SF1					AT5G48850.1	ATSDI1	Tetratricopeptide repeat (TPR)-like superfamily protein	K1
468	VIT_207s0005g06500	0.656284	0.517042	1.26831	0.521934	1.28833	0.517107	0.712765	1.39537	38056572	VIT_207s0005g06500.1	VIT_207s0005g06500.1	PF13855,PF11721,PF00069	PTHR27003,PTHR27003:SF61	KOG1187	2.7.11.1		GO:0005515,GO:0006468,GO:0005524,GO:0004672	AT5G48740.1		Leucine-rich repeat protein kinase family protein	K1
469	VIT_207s0031g00030	41.6649	47.3571	43.8351	40.9612	39.3509	33.8318	36.0252	53.5882	38056848	VIT_207s0031g00030.1	VIT_207s0031g00030.1	PF03248	PTHR10743,PTHR10743:SF1	KOG1688			GO:0016021	AT4G39220.1	ATRER1A	Rer1 family protein	K1
470	VIT_207s0031g00250	6.62231	4.30868	4.43038	4.47917	5.80212	5.03778	6.39163	6.92196	38058277	VIT_207s0031g00250.1	VIT_207s0031g00250.1	PF05911	PTHR31580,PTHR31580:SF3					AT2G23360.1		Plant protein of unknown function (DUF869)	K1
471	VIT_207s0031g00830	0.216384	0.0487237	0.184551	0.170239	0.416759	0.063542	0.165824	0.496288	38055449	VIT_207s0031g00830.1	VIT_207s0031g00830.1	PF01734,PF12854,PF13041,PF01535	PTHR24015,PTHR24015:SF511	KOG0513			GO:0006629	AT4G37070.2	AtPLAIVA,PLA IVA,PLP1	Acyl transferase/acyl hydrolase/lysophospholipase superfamily protein	K1
472	VIT_207s0031g00880	2.95858	3.43748	5.53372	3.49904	3.91783	1.6841	1.79043	4.783	38056700	VIT_207s0031g00880.1	VIT_207s0031g00880.1	PF00685	PTHR32175,PTHR32175:SF6				GO:0008146	AT3G50620.1		P-loop containing nucleoside triphosphate hydrolases superfamily protein	K1
473	VIT_207s0031g01490	15.9496	15.6753	14.8308	18.4479	32.3881	17.5759	18.5925	35.8228	38056566	VIT_207s0031g01490.1	VIT_207s0031g01490.1	PF10408,PF00622	PTHR13363,PTHR13363:SF1	KOG4692		K12169	GO:0034450,GO:0016567,GO:0006511,GO:0000151,GO:0005515	AT2G22010.1	RKP	related to KPC1	K1
474	VIT_207s0031g01750	12.9243	11.9136	12.9566	15.4724	13.5648	14.8199	16.3361	15.4403	38056532	VIT_207s0031g01750.1	VIT_207s0031g01750.1	PF13725,PF08351,PF05127,PF13718	PTHR10925		2.3.1.193	K14521	GO:0008080	AT1G10490.1		Domain of unknown function (DUF1726) ;Putative ATPase (DUF699)	K1
475	VIT_207s0031g01810	15.731	21.1276	23.0435	21.1879	27.1257	16.5417	20.4545	26.2904	38055941	VIT_207s0031g01810.1	VIT_207s0031g01810.1	PF14649	PTHR13650,PTHR13650:SF0			K19026		AT4G39420.1			K1
476	VIT_207s0031g01830	2.63633	2.93684	3.42593	5.15273	6.32332	4.19229	5.55281	9.56905	38056054	VIT_207s0031g01830.1	VIT_207s0031g01830.1		PTHR13650,PTHR13650:SF2					AT4G39420.2			K1
477	VIT_207s0031g01980	7.91606	2.05468	1.81033	2.30177	98.2363	4.25361	0.824905	133.434	38055379	VIT_207s0031g01980.1	VIT_207s0031g01980.1	PF00847	PTHR31190				GO:0006355,GO:0003700	AT5G64750.1	ABR1	Integrase-type DNA-binding superfamily protein	K1
478	VIT_207s0031g02090	15.5127	14.6223	14.0932	17.8407	14.7735	14.4693	17.1231	20.4955	38057789	VIT_207s0031g02090.1	VIT_207s0031g02090.1	PF14604			2.7.10.2		GO:0005515	AT2G07360.1		SH3 domain-containing protein	K1
479	VIT_207s0031g02610	2271.79	434.508	78.8267	52.355	5879.4	2160.73	2278.61	3902.59	38057032	VIT_207s0031g02610.1	VIT_207s0031g02610.1	PF02365	PTHR31719,PTHR31719:SF16				GO:0006355,GO:0003677	AT1G01720.1	ANAC002,ATAF1	NAC (No Apical Meristem) domain transcriptional regulator superfamily protein	K1
480	VIT_207s0031g02680	30.3527	30.2245	32.627	29.9404	25.2313	30.6333	29.7964	33.5268	38056590	VIT_207s0031g02680.1	VIT_207s0031g02680.1	PF00069	PTHR24056,PTHR24056:SF92		2.7.11.22,2.7.11.23	K02208	GO:0006468,GO:0005524,GO:0004672	AT5G63610.1	ATCDK8,CDKE;1,HEN3	cyclin-dependent kinase E;1	K1
481	VIT_207s0031g03060	7.08755	17.98	13.313	8.93745	17.79	9.40562	6.52258	19.4739	38056661	VIT_207s0031g03060.1	VIT_207s0031g03060.1	PF01823	PTHR33199,PTHR33199:SF6					AT4G24290.2		MAC/Perforin domain-containing protein	K1
482	VIT_207s0104g00390	18.2464	18.1616	19.7298	20.277	21.0388	15.27	13.8496	24.0913	38058005	VIT_207s0104g00390.1	VIT_207s0104g00390.1		PTHR33739,PTHR33739:SF4					AT3G23590.1	MED33A,RFR1	REF4-related 1	K1
483	VIT_207s0104g00570	30.9423	38.6658	31.8464	30.7929	34.2193	25.5577	25.8819	42.2574	38057269	VIT_207s0104g00570.1	VIT_207s0104g00570.1	PF00651	PTHR24411,PTHR24411:SF33	KOG1987		K10523	GO:0005515	AT3G06190.1	ATBPM2,BPM2	BTB-POZ and MATH domain 2	K1
484	VIT_207s0104g00930	41.7228	55.3126	49.307	55.0241	75.1726	44.8039	26.5826	86.4268	38056846	VIT_207s0104g00930.1	VIT_207s0104g00930.1	PF00135	PTHR23024,PTHR23024:SF98	KOG1515	3.1.1.1	K14493		AT3G63010.1	ATGID1B,GID1B	alpha/beta-Hydrolases superfamily protein	K1
485	VIT_207s0104g00960	5.21256	0	1.18157	3.08559	5.60082	0.129601	1.92421	4.49063	38057275	VIT_207s0104g00960.1	VIT_207s0104g00960.1	PF00125,PF16211	PTHR23430	KOG1756		K11251	GO:0003677	AT1G08880.1	G-H2AX,GAMMA-H2AX,H2AXA,HTA5	Histone superfamily protein	K1
486	VIT_207s0104g01580	8.14241	6.7454	9.12078	9.39901	11.3941	8.05169	9.07905	10.4465	38057469	VIT_207s0104g01580.1	VIT_207s0104g01580.1		PTHR33400,PTHR33400:SF1					AT4G02560.1	LD	Homeodomain-like superfamily protein	K1
487	VIT_207s0129g00210	25.7307	12.6635	6.3434	4.34155	137.844	42.9044	25.581	102.115	38058148	VIT_207s0129g00210.1	VIT_207s0129g00210.1	PF00651,PF02135	PTHR24413,PTHR24413:SF129	KOG1778	2.3.1.48		GO:0005515,GO:0008270,GO:0006355,GO:0005634,GO:0004402,GO:0003712	AT5G67480.2	ATBT4,BT4	BTB and TAZ domain protein 4	K1
488	VIT_207s0129g00540	20.4275	20.8352	18.8489	21.0762	26.6878	20.5709	22.9317	32.3229	38057461	VIT_207s0129g00540.1	VIT_207s0129g00540.1	PF00515,PF13414	PTHR23083,PTHR23083:SF443	KOG0550,KOG0548			GO:0005515	AT4G37460.1	SRFR1	Tetratricopeptide repeat (TPR)-like superfamily protein	K1
489	VIT_207s0129g00760	0.424206	0.205037	0.033205	0.9083	8.46791	0.576334	0.522149	12.9868	38057746	VIT_207s0129g00760.1	VIT_207s0129g00760.1	PF00067	PTHR24298,PTHR24298:SF116		1.14.13.89		GO:0055114,GO:0020037,GO:0016705,GO:0005506	AT4G37370.1	CYP81D8	cytochrome P450, family 81, subfamily D, polypeptide 8	K1
490	VIT_207s0129g00800	1.70973	0.20011	0.401422	1.62483	44.3806	2.81758	2.58919	51.8408	38057124	VIT_207s0129g00800.1	VIT_207s0129g00800.1	PF00067	PTHR24298,PTHR24298:SF116		1.14.13.89		GO:0055114,GO:0020037,GO:0016705,GO:0005506	AT4G37370.1	CYP81D8	cytochrome P450, family 81, subfamily D, polypeptide 8	K1
491	VIT_207s0130g00070	29.3321	31.2456	30.0015	31.1321	25.7268	28.1051	29.9115	33.4374	38058249	VIT_207s0130g00070.1	VIT_207s0130g00070.1	PF00122,PF12710	PTHR24093,PTHR24093:SF82		3.6.3.8	K14950	GO:0046872,GO:0000166,GO:0016887,GO:0016021,GO:0006812	AT5G23630.1	MIA,PDR2	phosphate deficiency response 2	K1
492	VIT_207s0130g00370	9.56046	10.6664	15.7533	13.2027	12.3715	7.81478	7.96065	17.3344	38055640	VIT_207s0130g00370.1	VIT_207s0130g00370.1	PF01713,PF08590	PTHR13308	KOG2401				AT5G23520.1		smr (Small MutS Related) domain-containing protein	K1
493	VIT_207s0130g00390	1.87662	2.71767	2.70473	2.59438	2.1788	2.00271	2.72079	2.96574	38055912	VIT_207s0130g00390.1	VIT_207s0130g00390.1	PF01426,PF00145,PF12047	PTHR10629,PTHR10629:SF36		2.1.1.37	K00558	GO:0003682	AT5G49160.1	DDM2,DMT01,DMT1,MET1,MET2,METI	methyltransferase 1	K1
494	VIT_207s0141g00360	38.3816	14.1919	1.8632	0.853561	178.904	35.4277	24.2287	102.313	38057189	VIT_207s0141g00360.1	VIT_207s0141g00360.1	PF01764	PTHR31403,PTHR31403:SF7	KOG4569	3.1.1.32,3.1.1.26,3.1.1.3		GO:0006629	AT2G30550.2		alpha/beta-Hydrolases superfamily protein	K1
495	VIT_207s0141g00630	23.871	16.5782	15.2046	16.7192	24.026	20.1539	16.9464	30.2602	38056578	VIT_207s0141g00630.1	VIT_207s0141g00630.1	PF03208	PTHR19317,PTHR19317:SF3	KOG3142				AT1G55190.1	PRA1.F2,PRA7	PRA1 (Prenylated rab acceptor) family protein	K1
496	VIT_207s0141g00690	7.23532	1.44109	0.262583	1.31674	66.7556	2.99724	2.60968	49.5558	38055832	VIT_207s0141g00690.1	VIT_207s0141g00690.1	PF00847	PTHR31677				GO:0006355,GO:0003700	AT1G50640.1	ATERF3,ERF3	ethylene responsive element binding factor 3	K1
497	VIT_207s0151g00590	0.57486	0.637528	0.694925	0.414341	1.59256	0.160269	0.421481	1.6466	38055948	VIT_207s0151g00590.1	VIT_207s0151g00590.1	PF03372	PTHR11200,PTHR11200:SF159	KOG0565				AT2G32010.2	CVL1	CVP2 like 1	K1
498	VIT_207s0151g00930	0.575583	0.176509	0.313578	1.30715	1.75134	0.400279	0.91973	2.28449	38055435	VIT_207s0151g00930.1	VIT_207s0151g00930.1	PF05910	PTHR31972,PTHR31972:SF13					AT5G28150.1		Plant protein of unknown function (DUF868)	K1
499	VIT_207s0191g00100	0	0.307361	0	0	0.87867	0.0913747	0.15006	0.702221	38057056	VIT_207s0191g00100.1	VIT_207s0191g00100.1		PTHR35164,PTHR35164:SF1					AT4G40020.1		Myosin heavy chain-related protein	K1
500	VIT_207s0191g00170	26.4426	28.4434	29.6208	25.0631	26.1573	25.7032	28.0481	32.1946	38056550	VIT_207s0191g00170.1	VIT_207s0191g00170.1	PF04791	PTHR21355,PTHR21355:SF0	KOG2296				AT5G65290.1		LMBR1-like membrane protein	K1
501	VIT_207s0197g00150	13.971	9.09508	8.07222	2.98816	9.88241	9.21158	9.34805	13.0258	38057057	VIT_207s0197g00150.1	VIT_207s0197g00150.1	PF05659	PTHR23155,PTHR23155:SF543					AT5G66900.1		Disease resistance protein (CC-NBS-LRR class) family	K1
502	VIT_207s0205g00190	0.058216	0	0.0602333	0	0.780588	0.0596237	0.34232	0.579022	38057067	VIT_207s0205g00190.1	VIT_207s0205g00190.1	PF00010	PTHR23042,PTHR23042:SF61				GO:0046983	AT4G37850.1		basic helix-loop-helix (bHLH) DNA-binding superfamily protein	K1
503	VIT_207s0255g00120	11.9449	10.4407	11.4009	14.36	14.096	13.3894	14.3723	15.4581	38057864	VIT_207s0255g00120.1	VIT_207s0255g00120.1	PF16909,PF06650	PTHR16166,PTHR16166:SF98					AT3G50380.1		Protein of unknown function (DUF1162)	K1
504	VIT_208s0007g00010	80.7893	87.0384	63.8916	54.1857	136.87	63.2036	65.7114	175.726	38024837	VIT_208s0007g00010.1	VIT_208s0007g00010.1	PF01412	PTHR23180,PTHR23180:SF293	KOG0704		K12492	GO:0005096	AT3G53710.1	AGD6	ARF-GAP domain 6	K1
505	VIT_208s0007g00020	2.84337	2.2722	4.18574	3.08166	6.39403	5.96627	1.90268	5.891	38024104	VIT_208s0007g00020.1	VIT_208s0007g00020.1	PF00999	PTHR32468,PTHR32468:SF10				GO:0055085,GO:0016021,GO:0015299,GO:0006812	AT3G53720.1	ATCHX20,CHX20	cation/H+ exchanger 20	K1
506	VIT_208s0007g00030	20.164	28.3698	28.1465	19.784	22.9822	23.6926	21.6723	33.6097	38025634	VIT_208s0007g00030.1	VIT_208s0007g00030.1	PF00582,PF00999	PTHR32468,PTHR32468:SF10				GO:0006950,GO:0055085,GO:0016021,GO:0015299,GO:0006812	AT3G53720.1	ATCHX20,CHX20	cation/H+ exchanger 20	K1
507	VIT_208s0007g00050	7.47567	8.52597	5.94448	5.87993	17.2053	6.89262	6.81213	15.9259	38026252	VIT_208s0007g00050.1	VIT_208s0007g00050.1	PF09133	PTHR16124					AT5G02520.1			K1
508	VIT_208s0007g00200	6.95552	4.88556	2.50268	2.10129	14.2063	4.3009	2.15777	22.4045	38026401	VIT_208s0007g00200.1	VIT_208s0007g00200.1	PF12796	PTHR24128,PTHR24128:SF14	KOG4412				AT2G28840.1	XBAT31	XB3 ortholog 1 in Arabidopsis thaliana	K1
509	VIT_208s0007g00380	23.7941	25.5724	27.0803	31.9376	24.3612	25.9462	29.3799	32.8021	38024190	VIT_208s0007g00380.1	VIT_208s0007g00380.1		PTHR21497,PTHR21497:SF24	KOG1139	3.4.17.20			AT5G02310.1	PRT6	proteolysis 6	K1
510	VIT_208s0007g00480	28.873	33.243	23.0269	20.3957	61.9124	26.6568	22.5018	103.732	38026374	VIT_208s0007g00480.1	VIT_208s0007g00480.1	PF01237	PTHR10972	KOG2209				AT5G02100.1	ORP3A,UNE18	Oxysterol-binding family protein	K1
511	VIT_208s0007g00960	0.412566	0.0131547	0	0.0459237	0.593576	0.469445	0.161383	0.670176	38024786	VIT_208s0007g00960.1	VIT_208s0007g00960.1	PF13947,PF00069	PTHR27005,PTHR27005:SF11	KOG1187	2.7.11.1		GO:0030247,GO:0006468,GO:0005524,GO:0004672	AT5G02070.1		Protein kinase family protein	K1
512	VIT_208s0007g00970	31.1526	19.0916	12.3048	20.5064	127.694	25.9885	32.0508	114.676	38023566	VIT_208s0007g00970.1	VIT_208s0007g00970.1	PF00076,PF12353	PTHR10352	KOG0122		K03248	GO:0003676,GO:0005852,GO:0005737,GO:0003743	AT3G11400.1	ATEIF3G1,EIF3G1	eukaryotic translation initiation factor 3G1	K1
513	VIT_208s0007g01150	17.8198	19.6633	21.3314	16.6871	15.9475	17.666	19.7721	21.116	38026295	VIT_208s0007g01150.1	VIT_208s0007g01150.1	PF00069	PTHR24348	KOG0595	2.7.11.1	K08269	GO:0006468,GO:0005524,GO:0004672	AT2G37840.1		Protein kinase superfamily protein	K1
514	VIT_208s0007g01250	11.2822	7.66891	6.70647	7.98171	13.1334	7.73015	5.93437	12.6973	38025134	VIT_208s0007g01250.1	VIT_208s0007g01250.1	PF11891	PTHR31038,PTHR31038:SF1					AT2G37860.3	LCD1	Protein of unknown function (DUF3411)	K1
515	VIT_208s0007g01280	18.0665	15.2274	12.1679	13.9892	34.181	16.2653	17.8374	41.5828	38025710	VIT_208s0007g01280.1	VIT_208s0007g01280.1	PF00153	PTHR24089,PTHR24089:SF307	KOG0752				AT3G53940.1		Mitochondrial substrate carrier family protein	K1
516	VIT_208s0007g01680	2.98704	4.64613	2.27919	1.87045	5.23044	3.07806	3.53477	6.03229	38026424	VIT_208s0007g01680.1	VIT_208s0007g01680.1	PF17048,PF04734	PTHR12670,PTHR12670:SF4		3.5.1.23	K12349		AT1G07380.1		Neutral/alkaline non-lysosomal ceramidase	K1
517	VIT_208s0007g01750	5.69615	6.13726	7.74233	7.6662	7.11079	5.39464	5.93576	8.28648	38023577	VIT_208s0007g01750.1	VIT_208s0007g01750.1	PF01039	PTHR22855,PTHR22855:SF38		6.4.1.2	K01962		AT2G38040.2	CAC3	acetyl Co-enzyme a carboxylase carboxyltransferase alpha subunit	K1
518	VIT_208s0007g01790	24.8049	22.5172	19.2648	24.3195	19.8851	24.3372	24.661	28.2444	38025818	VIT_208s0007g01790.1	VIT_208s0007g01790.1		PTHR21419,PTHR21419:SF23		3.2.1.162			AT3G09090.1	DEX1	defective in exine formation protein (DEX1)	K1
519	VIT_208s0007g02100	1.63813	11.6634	5.75621	4.26302	8.48886	3.4574	2.08457	9.89857	38025517	VIT_208s0007g02100.1	VIT_208s0007g02100.1	PF04488,PF04572	PTHR12042,PTHR12042:SF18	KOG1928		K01988		AT3G09020.1		alpha 1,4-glycosyltransferase family protein	K1
520	VIT_208s0007g02130	20.6355	28.3406	24.9798	22.2318	22.9416	23.4803	24.4215	28.3225	38025023	VIT_208s0007g02130.1	VIT_208s0007g02130.1	PF00035,PF03031	PTHR23081,PTHR23081:SF1	KOG0323	3.1.3.16	K18998		AT5G01270.2	ATCPL2,CPL2	carboxyl-terminal domain (ctd) phosphatase-like 2	K1
521	VIT_208s0007g02230	11.209	7.93972	9.75527	12.9225	15.2966	12.1121	12.1506	16.9436	38023525	VIT_208s0007g02230.1	VIT_208s0007g02230.1	PF00153	PTHR24089,PTHR24089:SF190	KOG0752		K14684		AT5G01500.1	TAAC	thylakoid ATP/ADP carrier	K1
522	VIT_208s0007g02270	26.9032	18.5046	24.8455	23.4663	26.8325	23.4522	22.1155	30.4053	38024711	VIT_208s0007g02270.1	VIT_208s0007g02270.1	PF04791	PTHR31652			K14617		AT5G01460.1		LMBR1-like membrane protein	K1
523	VIT_208s0007g02310	9.7845	4.89956	6.86011	8.92573	11.2292	9.3914	9.71876	11.919	38025372	VIT_208s0007g02310.1	VIT_208s0007g02310.1	PF12333	PTHR16056,PTHR16056:SF2	KOG2149		K14827		AT5G06350.1		ARM repeat superfamily protein	K1
524	VIT_208s0007g02360	757.778	578.165	134.338	159.268	1834.31	1002.47	703.948	1127.76	38023839	VIT_208s0007g02360.1	VIT_208s0007g02360.1	PF03168	PTHR31415,PTHR31415:SF4					AT2G35980.1	ATNHL10,NHL10,YLS9	Late embryogenesis abundant (LEA) hydroxyproline-rich glycoprotein family	K1
525	VIT_208s0007g02820	7.13158	11.2785	8.52336	9.29122	10.4209	6.61406	9.6091	10.9264	38025899	VIT_208s0007g02820.1	VIT_208s0007g02820.1		PTHR36064					AT5G06240.1	emb2735	embryo defective 2735	K1
526	VIT_208s0007g03330	7.4801	10.6028	8.45881	5.09203	14.7766	8.38015	8.44034	18.0144	38025424	VIT_208s0007g03330.1	VIT_208s0007g03330.1	PF01521	PTHR10072,PTHR10072:SF46	KOG1119				AT5G03905.1		Iron-sulphur cluster biosynthesis family protein	K1
527	VIT_208s0007g03610	323.468	325.295	312.274	328.801	546.51	332.933	336.126	530.17	38023815	VIT_208s0007g03610.1	VIT_208s0007g03610.1	PF00070	PTHR22912,PTHR22912:SF144		1.6.5.4	K08232	GO:0055114,GO:0016491	AT3G52880.1	ATMDAR1,MDAR1	monodehydroascorbate reductase 1	K1
528	VIT_208s0007g03900	13.7803	2.53899	1.37248	4.50977	127.18	9.07876	4.40323	137.606	38024707	VIT_208s0007g03900.1	VIT_208s0007g03900.1		PTHR10015,PTHR10015:SF164					AT5G03720.1	AT-HSFA3,HSFA3	heat shock transcription factor A3	K1
529	VIT_208s0007g04630	8.59104	6.22192	7.96303	9.11832	7.44032	7.53379	7.95885	8.79299	38023951	VIT_208s0007g04630.1	VIT_208s0007g04630.1	PF00855	PTHR23120,PTHR23120:SF20	KOG2032				AT2G36810.1		ARM repeat superfamily protein	K1
530	VIT_208s0007g04800	2.1851	0	0.121	0.298223	9.61396	1.09615	1.48455	6.79434	38025579	VIT_208s0007g04800.1	VIT_208s0007g04800.1	PF00194	PTHR18952,PTHR18952:SF100	KOG0382	4.2.1.1			AT1G08080.1	ACA7,ATACA7	alpha carbonic anhydrase 7	K1
531	VIT_208s0007g04860	207.348	44.2779	47.9856	25.6677	409.125	233.347	212.046	443.865	38026134	VIT_208s0007g04860.1	VIT_208s0007g04860.1	PF06813	PTHR21576,PTHR21576:SF40					AT2G39210.1		Major facilitator superfamily protein	K1
532	VIT_208s0007g05200	3.07257	0.140197	2.88988	3.44257	2.88007	1.65479	1.98552	4.02815	38025979	VIT_208s0007g05200.1	VIT_208s0007g05200.1	PF00293	PTHR12629,PTHR12629:SF9	KOG2839		K07766	GO:0016787	AT3G12600.1	atnudt16,NUDT16	nudix hydrolase homolog 16	K1
533	VIT_208s0007g05250	26.2718	31.0812	30.2877	33.1717	50.2809	24.1917	31.0908	68.4622	38023262	VIT_208s0007g05250.1	VIT_208s0007g05250.1	PF10374,PF10373	PTHR15696,PTHR15696:SF0			K14409		AT5G19400.3	SMG7	Telomerase activating protein Est1	K1
534	VIT_208s0007g05550	33.9482	50.568	47.917	35.029	83.0612	37.8413	48.6712	96.0206	38023715	VIT_208s0007g05550.1	VIT_208s0007g05550.1	PF14852,PF14853	PTHR13247,PTHR13247:SF3	KOG3364		K17969	GO:0000266	AT3G57090.1	BIGYIN,FIS1A	Tetratricopeptide repeat (TPR)-like superfamily protein	K1
535	VIT_208s0007g05560	2.90491	2.64562	2.36338	1.39835	8.67565	4.48048	4.68967	10.5588	38024708	VIT_208s0007g05560.1	VIT_208s0007g05560.1	PF14852,PF14853	PTHR13247,PTHR13247:SF3	KOG3364		K17969	GO:0000266	AT3G57090.1	BIGYIN,FIS1A	Tetratricopeptide repeat (TPR)-like superfamily protein	K1
536	VIT_208s0007g05830	0.878558	0.774808	0.1658	0.197784	3.15877	1.12672	0	4.75786	38025811	VIT_208s0007g05830.1	VIT_208s0007g05830.1		PTHR38223,PTHR38223:SF1								K1
537	VIT_208s0007g06250	0.265175	0.0222483	0.076003	0.0193727	0.749001	0.419395	0.394786	1.03997	38025501	VIT_208s0007g06250.1	VIT_208s0007g06250.1	PF08263,PF13855,PF07714	PTHR27001,PTHR27001:SF8	KOG1187	2.7.11.1		GO:0005515,GO:0006468,GO:0004672	AT5G06820.1	SRF2	STRUBBELIG-receptor family 2	K1
538	VIT_208s0007g06800	0.808896	0.235106	0.30246	0.173817	0.98042	0.386354	0.56556	0.904117	38023518	VIT_208s0007g06800.1	VIT_208s0007g06800.1	PF00385,PF01426,PF00145	PTHR10629,PTHR10629:SF30		2.1.1.37	K00558	GO:0003682	AT1G69770.1	CMT3	chromomethylase 3	K1
539	VIT_208s0007g07120	21.3835	40.0893	51.0524	57.8756	127.524	33.7408	32.6663	128.644	38025493	VIT_208s0007g07120.1	VIT_208s0007g07120.1	PF00646,PF01344	PTHR24412,PTHR24412:SF230				GO:0005515	AT2G44130.1		Galactose oxidase/kelch repeat superfamily protein	K1
540	VIT_208s0007g07370	9.74335	9.49468	9.04441	10.4109	8.08943	7.16751	5.16396	11.094	38023527	VIT_208s0007g07370.1	VIT_208s0007g07370.1	PF13671	PTHR11055,PTHR11055:SF22	KOG0635	2.7.1.25	K00860		AT3G03900.1	APK3	adenosine-5\'-phosphosulfate (APS) kinase 3	K1
541	VIT_208s0007g07520	17.4304	22.9257	25.3128	23.9536	494.11	31.6426	9.57622	295.57	38024840	VIT_208s0007g07520.1	VIT_208s0007g07520.1	PF08659	PTHR24322,PTHR24322:SF429	KOG0725				AT4G13180.1		NAD(P)-binding Rossmann-fold superfamily protein	K1
542	VIT_208s0007g07560	11.3961	11.7948	14.649	15.2845	15.8911	13.2467	13.1713	29.0332	38024587	VIT_208s0007g07560.1	VIT_208s0007g07560.1	PF07983,PF00332	PTHR32227,PTHR32227:SF95		3.2.1.39		GO:0005975,GO:0004553	AT2G19440.1		O-Glycosyl hydrolases family 17 protein	K1
543	VIT_208s0007g08120	4.84728	2.72891	3.46231	4.9938	7.01291	3.74673	2.66137	8.99525	38025706	VIT_208s0007g08120.1	VIT_208s0007g08120.1	PF03016	PTHR11062,PTHR11062:SF21	KOG1021				AT3G57630.1		exostosin family protein	K1
544	VIT_208s0007g08610	2.45378	1.77078	2.49535	2.46326	24.7481	2.05913	2.32009	13.0809	38025912	VIT_208s0007g08610.1	VIT_208s0007g08610.1										K1
545	VIT_208s0007g08650	9.58423	8.57459	10.4517	9.7235	8.98482	8.25891	10.3974	12.6054	38024506	VIT_208s0007g08650.1	VIT_208s0007g08650.1	PF08161	PTHR21576,PTHR21576:SF19	KOG1248		K14794		AT4G23540.1		ARM repeat superfamily protein	K1
546	VIT_208s0007g08690	33.6402	29.4669	34.0636	31.7523	26.9648	31.6901	31.8876	39.8546	38023829	VIT_208s0007g08690.1	VIT_208s0007g08690.1	PF02209,PF00626	PTHR11977,PTHR11977:SF46				GO:0007010,GO:0003779	AT2G41740.1	ATVLN2,VLN2	villin 2	K1
547	VIT_208s0007g08730	11.4823	13.2375	14.0039	14.4489	12.9204	12.7621	12.3146	14.9184	38023264	VIT_208s0007g08730.1	VIT_208s0007g08730.1	PF13304,PF00005,PF12698	PTHR19229,PTHR19229:SF36	KOG0059			GO:0005524,GO:0016887,GO:0016021,GO:0006810,GO:0005215	AT2G41700.1	ABCA1,AtABCA1	ATP-binding cassette A1	K1
548	VIT_208s0007g08940	12.4928	10.5864	11.9731	14.3785	10.9593	11.5332	11.7144	14.3988	38024394	VIT_208s0007g08940.1	VIT_208s0007g08940.1	PF04097	PTHR11225			K14309	GO:0006810,GO:0005643	AT2G41620.1		Nucleoporin interacting component (Nup93/Nic96-like) family protein	K1
549	VIT_208s0007g08960	24.6439	26.171	21.4068	24.0834	24.7132	31.1015	31.2967	33.9016	38022954	VIT_208s0007g08960.1	VIT_208s0007g08960.1	PF00122,PF12710,PF00689	PTHR24093,PTHR24093:SF296	KOG0202	3.6.3.8		GO:0046872,GO:0000166	AT2G41560.1	ACA4	autoinhibited Ca(2+)-ATPase, isoform 4	K1
550	VIT_208s0007g09040	17.1324	18.2409	22.7882	21.0122	23.2497	14.6915	17.8708	29.9963	38024736	VIT_208s0007g09040.1	VIT_208s0007g09040.1	PF12171,PF00226	PTHR24078,PTHR24078:SF232			K09506		AT1G74250.1		DNAJ heat shock N-terminal domain-containing protein	K1
551	VIT_208s0032g00440	18.5561	29.1361	29.5409	28.835	25.4971	29.8632	27.7691	37.1912	38024166	VIT_208s0032g00440.1	VIT_208s0032g00440.1	PF05739,PF00804	PTHR19957,PTHR19957:SF131	KOG0810		K08486	GO:0005515,GO:0016020	AT3G03800.1	ATSYP131,SYP131	syntaxin of plants 131	K1
552	VIT_208s0032g00460	20.7297	26.6996	17.6682	17.8453	32.3163	27.1595	25.6617	39.4662	38023989	VIT_208s0032g00460.1	VIT_208s0032g00460.1	PF10536						AT1G48120.1		hydrolases;protein serine/threonine phosphatases	K1
553	VIT_208s0032g00760	8.28684	7.4814	6.56532	7.64708	24.7372	15.1151	12.1072	18.4321	38026369	VIT_208s0032g00760.1	VIT_208s0032g00760.1	PF04525	PTHR31087,PTHR31087:SF22					AT2G38640.1		Protein of unknown function (DUF567)	K1
554	VIT_208s0032g01140	11.4117	11.8531	11.8991	10.1269	14.4143	10.9832	11.8996	13.9751	38026418	VIT_208s0032g01140.1	VIT_208s0032g01140.1	PF08626,PF12739	PTHR12975,PTHR12975:SF6					AT5G16280.1		Tetratricopeptide repeat (TPR)-like superfamily protein	K1
555	VIT_208s0032g01210	34.0399	34.9326	30.9355	31.948	33.6228	29.4254	37.4351	42.6081	38024052	VIT_208s0032g01210.1	VIT_208s0032g01210.1		PTHR35722					AT2G35900.1			K1
556	VIT_208s0032g01230	15.8983	16.6161	17.1525	17.5588	15.1927	15.2322	17.5312	17.7801	38024269	VIT_208s0032g01230.1	VIT_208s0032g01230.1	PF00270,PF00271,PF07717,PF04408	PTHR18934,PTHR18934:SF100		3.6.4.13,3.6.4.12	K14442	GO:0005524,GO:0003676,GO:0004386	AT2G35920.1		RNA helicase family protein	K1
557	VIT_208s0040g00050	6.86033	8.10327	7.55575	6.07721	7.87536	5.19242	6.41648	12.0011	38023751	VIT_208s0040g00050.1	VIT_208s0040g00050.1							AT2G38580.1		Mitochondrial ATP synthase D chain-related protein	K1
558	VIT_208s0040g00960	3.97821	8.47359	2.58438	2.50409	57.4276	15.1679	4.3031	40.6676	38023146	VIT_208s0040g00960.1	VIT_208s0040g00960.1	PF00135	PTHR23024,PTHR23024:SF135	KOG1515	3.1.1.1			AT1G68620.1		alpha/beta-Hydrolases superfamily protein	K1
559	VIT_208s0040g00990	20.2132	20.6801	16.6038	14.697	56.6512	20.1954	17.4642	80.2934	38024498	VIT_208s0040g00990.1	VIT_208s0040g00990.1	PF08711	PTHR15141,PTHR15141:SF40				GO:0006351,GO:0005634,GO:0003677	AT5G05140.1		Transcription elongation factor (TFIIS) family protein	K1
560	VIT_208s0040g01370	159.225	93.0282	53.4161	62.909	790.12	190.733	119.074	675.12	38024880	VIT_208s0040g01370.1	VIT_208s0040g01370.1	PF00403	PTHR22814,PTHR22814:SF100	KOG1603			GO:0046872,GO:0030001	AT2G36950.1		Heavy metal transport/detoxification superfamily protein	K1
561	VIT_208s0040g01820	10.642	25.0684	6.73917	0	54.4719	21.6394	25.3466	76.1968	38023505	VIT_208s0040g01820.1	VIT_208s0040g01820.1		PTHR33659,PTHR33659:SF3								K1
562	VIT_208s0040g03100	235.559	99.0929	68.2288	80.819	787.9	259.986	303.337	914.069	38023445	VIT_208s0040g03100.1	VIT_208s0040g03100.1	PF13410,PF13417	PTHR11260,PTHR11260:SF294	KOG0406	2.5.1.18	K00799	GO:0005515	AT5G02790.1	GSTL3	Glutathione S-transferase family protein	K1
563	VIT_208s0056g00790	18.6879	19.3293	14.7063	11.3994	16.2073	15.6129	17.2884	21.4596	38025312	VIT_208s0056g00790.1	VIT_208s0056g00790.1	PF04727	PTHR12771,PTHR12771:SF25	KOG2998				AT3G03610.1		ELMO/CED-12 family protein	K1
564	VIT_208s0056g00870	1.98083	0.666741	0.662864	0.296735	1.29553	1.04803	0.832586	2.27177	38024253	VIT_208s0056g00870.1	VIT_208s0056g00870.1	PF01554	PTHR11206,PTHR11206:SF102	KOG1347		K03327	GO:0055085,GO:0016020,GO:0015297,GO:0015238,GO:0006855	AT1G33110.1		MATE efflux family protein	K1
565	VIT_208s0056g00890	0.143675	0	0	0.102735	0.848709	0	0	0.767116	38024108	VIT_208s0056g00890.1	VIT_208s0056g00890.1	PF01554	PTHR11206,PTHR11206:SF102	KOG1347			GO:0055085,GO:0016020,GO:0015297,GO:0015238,GO:0006855	AT1G33110.1		MATE efflux family protein	K1
566	VIT_208s0056g01110	11.736	11.7351	12.1271	13.606	12.2775	12.7335	14.3411	18.2721	38023353	VIT_208s0056g01110.1	VIT_208s0056g01110.1	PF13087,PF13086,PF16399	PTHR10887,PTHR10887:SF5			K12874	GO:0005681,GO:0000398	AT2G38770.1	EMB2765	P-loop containing nucleoside triphosphate hydrolases superfamily protein	K1
567	VIT_208s0056g01320	18.7079	22.69	19.9539	21.846	21.4579	20.3974	22.4423	30.0515	38024196	VIT_208s0056g01320.1	VIT_208s0056g01320.1	PF08066,PF00570,PF01612	PTHR12124,PTHR12124:SF47		3.1.13.5	K12591	GO:0006396,GO:0000176,GO:0005622,GO:0003676,GO:0008408,GO:0006139	AT5G35910.1		Polynucleotidyl transferase, ribonuclease H fold protein with HRDC domain	K1
568	VIT_208s0056g01410	5.98837	1.79313	1.90782	1.82525	13.5972	4.90866	3.94629	9.74673	38024402	VIT_208s0056g01410.1	VIT_208s0056g01410.1	PF00240	PTHR10666,PTHR10666:SF159	KOG0005,KOG0001			GO:0005515	AT4G05230.1		Ubiquitin-like superfamily protein	K1
569	VIT_208s0056g01530	0.898346	0	0.119417	0.148495	1.42865	0.353114	0.515329	1.24061	38025515	VIT_208s0056g01530.1	VIT_208s0056g01530.1	PF00168,PF08372	PTHR10024,PTHR10024:SF172				GO:0005515	AT3G03680.1		C2 calcium/lipid-binding plant phosphoribosyltransferase family protein	K1
570	VIT_208s0056g01700	23.0265	24.6435	18.7875	21.0959	21.6797	21.6608	23.9196	29.6446	38025298	VIT_208s0056g01700.1	VIT_208s0056g01700.1	PF13906,PF13520	PTHR11785,PTHR11785:SF411	KOG1286		K13863	GO:0016020,GO:0015171,GO:0003333	AT1G58030.1	CAT2	cationic amino acid transporter 2	K1
571	VIT_208s0058g00290	10.5053	24.8932	35.8782	33.2773	58.371	9.70806	9.32462	84.5634	38023825	VIT_208s0058g00290.1	VIT_208s0058g00290.1	PF00139,PF00069	PTHR27007,PTHR27007:SF43	KOG1187	2.7.11.1		GO:0030246,GO:0006468,GO:0005524,GO:0004672	AT5G01550.1	LECRKA4.2	lectin receptor kinase a4.1	K1
572	VIT_208s0058g00300	2.30537	5.85921	7.35861	5.90103	11.0806	1.66793	2.07823	16.1365	38025137	VIT_208s0058g00300.1	VIT_208s0058g00300.1	PF00139	PTHR27007,PTHR27007:SF43		2.7.11.1		GO:0030246	AT5G01550.1	LECRKA4.2	lectin receptor kinase a4.1	K1
573	VIT_208s0058g01090	156.172	91.8668	128.308	74.1746	532.19	181.066	229.032	509.04	38025082	VIT_208s0058g01090.1	VIT_208s0058g01090.1	PF14531,PF03822	PTHR24347,PTHR24347:SF189	KOG0583	2.7.11.1		GO:0007165	AT5G01820.1	ATCIPK14,ATSR1,CIPK14,SnRK3.15,SR1	serine/threonine protein kinase 1	K1
574	VIT_208s0058g01100	1.86074	2.13562	2.22701	1.09373	66.2581	4.1249	3.4727	59.9922	38024937	VIT_208s0058g01100.1	VIT_208s0058g01100.1	PF00514,PF04564	PTHR23315,PTHR23315:SF63		6.3.2.19		GO:0005515,GO:0016567,GO:0004842	AT5G01830.1		ARM repeat superfamily protein	K1
575	VIT_208s0058g01300	15.1186	19.7825	13.3758	14.2511	28.8778	14.9394	15.9005	38.6694	38023307	VIT_208s0058g01300.1	VIT_208s0058g01300.1	PF07496,PF02362	PTHR23336,PTHR23336:SF24				GO:0008270,GO:0003677	AT4G32010.1	HSI2-L1,HSL1,VAL2	HSI2-like 1	K1
576	VIT_208s0058g01440	8.94423	17.4371	18.7279	16.3275	56.6582	13.5578	14.4977	58.0135	38025595	VIT_208s0058g01440.1	VIT_208s0058g01440.1	PF14531	PTHR24351,PTHR24351:SF80	KOG0598	2.7.11.1	K04688		AT3G08720.1	ATPK19,ATPK2,ATS6K2,S6K2	serine/threonine protein kinase 2	K1
577	VIT_208s0105g00330	9.57628	8.16314	9.79235	13.2693	11.2624	9.66752	11.2572	15.3031	38024775	VIT_208s0105g00330.1	VIT_208s0105g00330.1	PF11935,PF12295	PTHR15245,PTHR15245:SF25	KOG1895		K06100		AT5G01400.1	ESP4	HEAT repeat-containing protein	K1
578	VIT_208s0105g00400	4.68167	6.73079	2.93675	1.65485	57.0468	5.05287	4.77948	59.7349	38023692	VIT_208s0105g00400.1	VIT_208s0105g00400.1	PF13837	PTHR10032,PTHR10032:SF215				GO:0006351,GO:0005634,GO:0003700	AT5G01380.1		Homeodomain-like superfamily protein	K1
579	VIT_208s0105g00570	23.3788	19.7974	26.8101	23.0027	24.5355	19.2245	23.2685	39.6069	38025233	VIT_208s0105g00570.1	VIT_208s0105g00570.1	PF00962	PTHR11359,PTHR11359:SF8		3.5.4.6,3.5.4.17	K01490	GO:0019239,GO:0032264,GO:0003876	AT2G38280.2	ATAMPD,FAC1	AMP deaminase, putative / myoadenylate deaminase, putative	K1
580	VIT_209s0002g00220	34.7917	154.175	40.4262	8.63345	357.818	42.2975	68.6341	389.832	38069700	VIT_209s0002g00220.1	VIT_209s0002g00220.1	PF13639	PTHR14155,PTHR14155:SF99				GO:0008270,GO:0005515	AT1G72310.1	ATL3	RING/U-box superfamily protein	K1
581	VIT_209s0002g00760	1.36613	0.0714307	0.27105	0	1.31968	0.324315	0.46593	1.46791	38070863	VIT_209s0002g00760.1	VIT_209s0002g00760.1	PF06075	PTHR31928,PTHR31928:SF2					AT3G14170.1		Plant protein of unknown function (DUF936)	K1
582	VIT_209s0002g00840	16.1138	13.375	16.2184	16.1731	12.7312	14.0006	16.1018	16.1891	38071089	VIT_209s0002g00840.1	VIT_209s0002g00840.1	PF04121	PTHR13003			K14301	GO:0006810,GO:0005643	AT3G14120.3			K1
583	VIT_209s0002g00880	85.3644	77.497	86.2176	91.1334	78.5773	78.9566	76.2044	108.992	38070607	VIT_209s0002g00880.1	VIT_209s0002g00880.1	PF00076	PTHR24012,PTHR24012:SF379	KOG0148		K13201	GO:0003676	AT1G17370.1	UBP1B	oligouridylate binding protein 1B	K1
584	VIT_209s0002g00890	173.727	137.784	44.2988	26.9826	931.525	259.215	149.136	1062.34	38070671	VIT_209s0002g00890.1	VIT_209s0002g00890.1	PF09425,PF06200	PTHR33077			K13464		AT1G19180.1	JAZ1,TIFY10A	jasmonate-zim-domain protein 1	K1
585	VIT_209s0002g00940	6.68008	3.82439	4.01594	5.45295	9.26488	4.97314	5.97004	8.17255	38070849	VIT_209s0002g00940.1	VIT_209s0002g00940.1		PTHR34045,PTHR34045:SF3					AT1G72490.1			K1
586	VIT_209s0002g00990	21.1512	37.032	12.2676	10.1749	56.2999	28.7938	32.5718	50.6505	38071094	VIT_209s0002g00990.1	VIT_209s0002g00990.1	PF03893,PF01764	PTHR21493,PTHR21493:SF121	KOG2088			GO:0016042,GO:0006629	AT3G14075.1		Mono-/di-acylglycerol lipase, N-terminal;Lipase, class 3	K1
587	VIT_209s0002g01020	18.0499	16.4381	15.0992	13.4832	18.2996	17.0151	19.2611	32.0657	38069551	VIT_209s0002g01020.1	VIT_209s0002g01020.1	PF01699	PTHR12266,PTHR12266:SF9	KOG2399		K13754	GO:0055085,GO:0016021	AT1G54115.1	ATCCX4,CCX4	cation calcium exchanger 4	K1
588	VIT_209s0002g01150	118.165	128.145	93.0222	96.8905	646.503	137.553	72.0735	631.899	38070277	VIT_209s0002g01150.1	VIT_209s0002g01150.1	PF01966,PF04607	PTHR21262,PTHR21262:SF14		2.7.6.5		GO:0015969	AT1G54130.1	AT-RSH3,ATRSH3,RSH3	RELA/SPOT homolog 3	K1
589	VIT_209s0002g01640	38.3541	33.8617	31.6244	30.3601	37.2111	34.7173	32.2964	45.3383	38070909	VIT_209s0002g01640.1	VIT_209s0002g01640.1	PF12656	PTHR15818,PTHR15818:SF2	KOG4315		K13101		AT1G33520.1	MOS2	D111/G-patch domain-containing protein	K1
590	VIT_209s0002g01770	27.5297	24.3185	22.1911	26.3938	26.2505	30.8662	31.8228	40.1186	38070054	VIT_209s0002g01770.1	VIT_209s0002g01770.1	PF01233,PF02799	PTHR11377		2.3.1.97	K00671	GO:0004379,GO:0006499	AT5G57020.1	ATNMT1,NMT1	myristoyl-CoA:protein N-myristoyltransferase	K1
591	VIT_209s0002g01910	31.7062	35.3375	31.2997	34.9991	34.5586	34.9397	36.5471	39.9518	38070483	VIT_209s0002g01910.1	VIT_209s0002g01910.1	PF02736,PF00612,PF01843,PF00063	PTHR13140,PTHR13140:SF390		3.6.4.1	K10357	GO:0016459,GO:0005524,GO:0003774,GO:0005515	AT5G20490.1	ATXIK,XI-17,XIK	Myosin family protein with Dil domain	K1
592	VIT_209s0002g02130	22.5939	36.9138	14.892	13.8997	31.003	22.8259	28.3292	42.2168	38069975	VIT_209s0002g02130.1	VIT_209s0002g02130.1		PTHR35991,PTHR35991:SF1					AT1G17665.1			K1
593	VIT_209s0002g02260	0	0	0	0	0.447436	0.26054	0.128292	0.477967	38070151	VIT_209s0002g02260.1	VIT_209s0002g02260.1	PF00690,PF00702,PF00122	PTHR24093,PTHR24093:SF355		3.6.3.6	K01535	GO:0046872,GO:0000166	AT1G80660.1	AHA9,HA9	H(+)-ATPase 9	K1
594	VIT_209s0002g02530	43.1485	61.2135	56.566	69.7939	78.1521	52.0255	48.4631	84.2523	38069553	VIT_209s0002g02530.1	VIT_209s0002g02530.1	PF02812,PF00208	PTHR11606,PTHR11606:SF4		1.4.1.4	K00262	GO:0055114,GO:0016491,GO:0006520	AT1G51720.1		Amino acid dehydrogenase family protein	K1
595	VIT_209s0002g02630	61.9038	51.5364	45.6936	43.8124	74.8635	67.8103	52.5326	124.538	38070955	VIT_209s0002g02630.1	VIT_209s0002g02630.1	PF07687,PF01546	PTHR11014,PTHR11014:SF55			K14664	GO:0016787,GO:0008152	AT1G51760.1	IAR3,JR3	peptidase M20/M25/M40 family protein	K1
596	VIT_209s0002g02930	30.4055	24.1559	27.2596	30.397	71.3412	30.9945	28.1948	59.5458	38069606	VIT_209s0002g02930.1	VIT_209s0002g02930.1	PF04934	PTHR13104			K15128	GO:0016592,GO:0006357,GO:0001104	AT3G21350.1	MED6	RNA polymerase transcriptional regulation mediator-related	K1
597	VIT_209s0002g03210	3.52431	4.45818	5.35596	5.33094	5.07309	2.98753	4.52375	5.11423	38070238	VIT_209s0002g03210.1	VIT_209s0002g03210.1	PF01535,PF13041	PTHR24015,PTHR24015:SF381					AT1G51965.1	ABO5	ABA Overly-Sensitive 5	K1
598	VIT_209s0002g03380	75.1374	71.3708	82.1646	90.6171	188.077	69.407	63.9934	212.785	38070129	VIT_209s0002g03380.1	VIT_209s0002g03380.1	PF01909,PF04926,PF04928	PTHR10682,PTHR10682:SF24		2.7.7.19	K14376	GO:0016779,GO:0043631,GO:0003723,GO:0004652,GO:0005634	AT4G32850.5	nPAP,PAP(IV)	nuclear poly(a) polymerase	K1
599	VIT_209s0002g03490	4.17648	2.26389	3.01465	3.6249	3.46334	3.45557	4.28892	4.24919	38071064	VIT_209s0002g03490.1	VIT_209s0002g03490.1	PF12460,PF14500	PTHR12891	KOG1967		K15075		AT5G48120.1		ARM repeat superfamily protein	K1
600	VIT_209s0002g04170	19.3125	20.3097	17.3984	21.2576	15.7187	17.2545	20.7196	24.1358	38069543	VIT_209s0002g04170.1	VIT_209s0002g04170.1	PF13193,PF00501	PTHR24095,PTHR24095:SF52	KOG1176	6.2.1.3	K18660	GO:0008152,GO:0003824	AT3G16170.1		AMP-dependent synthetase and ligase family protein	K1
601	VIT_209s0002g04930	2.78446	4.42019	2.32782	4.13357	25.4248	9.93835	2.79496	24.0465	38069855	VIT_209s0002g04930.1	VIT_209s0002g04930.1		PTHR24413,PTHR24413:SF93					AT1G80440.1		Galactose oxidase/kelch repeat superfamily protein	K1
602	VIT_209s0002g05080	2.34153	2.70474	2.23007	3.70761	19.6047	7.04699	1.94237	20.3708	38071057	VIT_209s0002g05080.1	VIT_209s0002g05080.1	PF01344	PTHR24413,PTHR24413:SF93				GO:0005515	AT1G80440.1		Galactose oxidase/kelch repeat superfamily protein	K1
603	VIT_209s0002g05110	19.3761	18.7787	20.6278	23.341	19.1586	20.185	20.7811	27.5566	38069942	VIT_209s0002g05110.1	VIT_209s0002g05110.1	PF00515,PF13976,PF00665,PF12569	PTHR22767,PTHR22767:SF2		2.3.1.88	K00670	GO:0005515,GO:0015074	AT1G80410.1	EMB2753	tetratricopeptide repeat (TPR)-containing protein	K1
604	VIT_209s0002g05360	1.64654	3.05804	1.02245	1.06023	6.57978	1.76384	1.35823	10.7303	38070615	VIT_209s0002g05360.1	VIT_209s0002g05360.1	PF14510,PF08370,PF00005,PF01061	PTHR19241,PTHR19241:SF219		3.6.3.25		GO:0016887,GO:0005524,GO:0016020	AT1G15520.1	ABCG40,ATABCG40,ATPDR12,PDR12	pleiotropic drug resistance 12	K1
605	VIT_209s0002g05370	1.02099	0.528365	0.134661	0.2751	24.2827	1.52527	0.589554	19.3141	38070167	VIT_209s0002g05370.1	VIT_209s0002g05370.1	PF14510,PF08370,PF00005,PF01061	PTHR19241,PTHR19241:SF219		3.6.3.25		GO:0016887,GO:0005524,GO:0016020	AT1G15520.1	ABCG40,ATABCG40,ATPDR12,PDR12	pleiotropic drug resistance 12	K1
606	VIT_209s0002g05400	7.63104	2.26613	0.78317	0.955153	218.705	12.0815	4.73237	169.56	38070169	VIT_209s0002g05400.1	VIT_209s0002g05400.1	PF14510,PF08370,PF00005,PF01061	PTHR19241,PTHR19241:SF219		3.6.3.25		GO:0016887,GO:0005524,GO:0016020	AT1G15520.1	ABCG40,ATABCG40,ATPDR12,PDR12	pleiotropic drug resistance 12	K1
607	VIT_209s0002g05490	4.51773	1.64345	0.338187	0.562429	112.907	6.28336	2.67182	95.3718	38070267	VIT_209s0002g05490.1	VIT_209s0002g05490.1	PF14510,PF08370,PF00005,PF01061	PTHR19241,PTHR19241:SF219		3.6.3.25		GO:0016887,GO:0005524,GO:0016020	AT1G15520.1	ABCG40,ATABCG40,ATPDR12,PDR12	pleiotropic drug resistance 12	K1
608	VIT_209s0002g05570	3.2809	4.59029	1.91032	1.76657	16.628	4.45336	2.30439	23.0186	38069469	VIT_209s0002g05570.1	VIT_209s0002g05570.1	PF14510,PF08370,PF00005,PF01061	PTHR19241,PTHR19241:SF219		3.6.3.44		GO:0016887,GO:0005524,GO:0016020	AT1G15520.1	ABCG40,ATABCG40,ATPDR12,PDR12	pleiotropic drug resistance 12	K1
609	VIT_209s0002g05590	7.01734	8.77252	4.31125	6.0875	38.3981	10.691	5.67571	52.6817	38069860	VIT_209s0002g05590.1	VIT_209s0002g05590.1	PF14510,PF08370,PF00005,PF01061	PTHR19241,PTHR19241:SF219		3.6.3.44		GO:0016887,GO:0005524,GO:0016020	AT1G15520.1	ABCG40,ATABCG40,ATPDR12,PDR12	pleiotropic drug resistance 12	K1
610	VIT_209s0002g05830	23.4739	15.5916	7.75483	7.21571	56.9815	34.0298	31.3459	66.5166	38069636	VIT_209s0002g05830.1	VIT_209s0002g05830.1	PF00931	PTHR23155,PTHR23155:SF639				GO:0043531	AT1G12210.1	RFL1	RPS5-like 1	K1
611	VIT_209s0002g05840	3.0087	1.96299	0.993595	0.844826	4.56897	2.56694	3.13368	4.96905	38070751	VIT_209s0002g05840.1	VIT_209s0002g05840.1	PF00931	PTHR23155,PTHR23155:SF639			K13459	GO:0043531	AT1G12220.1	RPS5	Disease resistance protein (CC-NBS-LRR class) family	K1
612	VIT_209s0002g05850	105.455	51.7044	25.3801	18.6242	152.448	103.224	97.1651	184.227	38069985	VIT_209s0002g05850.1	VIT_209s0002g05850.1		PTHR23155,PTHR23155:SF639					AT5G47260.1		ATP binding;GTP binding;nucleotide binding;nucleoside-triphosphatases	K1
613	VIT_209s0002g05870	25.6988	15.9067	10.4777	9.05687	43.1683	28.7957	28.4597	47.9345	38070063	VIT_209s0002g05870.1	VIT_209s0002g05870.1	PF00931	PTHR23155,PTHR23155:SF639	KOG4658		K13459	GO:0043531	AT1G12220.1	RPS5	Disease resistance protein (CC-NBS-LRR class) family	K1
614	VIT_209s0002g06070	1.22041	0.832582	0	0.244527	2.59252	0.492875	0	3.90996	38070823	VIT_209s0002g06070.1	VIT_209s0002g06070.1		PTHR23241					AT1G52690.2		Late embryogenesis abundant protein (LEA) family protein	K1
615	VIT_209s0002g06400	0	8.57004	0	2.18962	11.5389	1.11194	1.10259	8.45487	38069523	VIT_209s0002g06400.1	VIT_209s0002g06400.1	PF05553	PTHR33098,PTHR33098:SF6					AT1G15385.1			K1
616	VIT_209s0002g06510	3.63232	5.57407	3.07087	3.49856	7.48934	1.99688	2.46694	8.77607	38070651	VIT_209s0002g06510.1	VIT_209s0002g06510.1	PF10250	PTHR31741,PTHR31741:SF2					AT1G52630.2		O-fucosyltransferase family protein	K1
617	VIT_209s0002g06780	7.07288	6.31089	5.9272	7.30538	8.31348	6.95402	7.80007	8.15792	38070627	VIT_209s0002g06780.1	VIT_209s0002g06780.1	PF13259	PTHR33373,PTHR33373:SF1					AT5G25360.1			K1
618	VIT_209s0002g07010	4.65278	0.275764	0.0250797	0.325979	4.51996	3.8554	3.65158	5.27777	38070846	VIT_209s0002g07010.1	VIT_209s0002g07010.1	PF00571	PTHR13780,PTHR13780:SF51	KOG1764				AT1G15330.1		Cystathionine beta-synthase (CBS) protein	K1
619	VIT_209s0002g07860	7.18957	8.88325	10.0296	9.21533	8.47024	8.09808	7.33424	11.328	38070764	VIT_209s0002g07860.1	VIT_209s0002g07860.1	PF02782,PF00370	PTHR10196,PTHR10196:SF69		2.7.1.30	K00864	GO:0016773,GO:0005975	AT1G80460.1	GLI1,NHO1	Actin-like ATPase superfamily protein	K1
620	VIT_209s0002g07890	5.83558	4.03312	2.04774	1.61862	8.09331	7.87157	5.08977	8.64652	38071058	VIT_209s0002g07890.1	VIT_209s0002g07890.1	PF00931	PTHR23155,PTHR23155:SF494	KOG4658			GO:0043531	AT3G14470.1		NB-ARC domain-containing disease resistance protein	K1
621	VIT_209s0002g07950	0.291909	0.717358	0.194774	0	3.3526	0.70407	0.829274	3.35941	38071133	VIT_209s0002g07950.1	VIT_209s0002g07950.1										K1
622	VIT_209s0002g08020	2.19444	2.14428	1.252	0.703469	2.2917	2.70078	2.43017	2.82567	38069602	VIT_209s0002g08020.1	VIT_209s0002g08020.1	PF00931	PTHR23155,PTHR23155:SF494	KOG4658			GO:0043531	AT3G14470.1		NB-ARC domain-containing disease resistance protein	K1
623	VIT_209s0002g08110	1.72279	0.633238	0.201257	0.240784	1.87225	1.93607	2.01885	2.7523	38071145	VIT_209s0002g08110.1	VIT_209s0002g08110.1										K1
624	VIT_209s0002g08160	7.14494	11.4196	5.85935	5.83497	8.46394	9.76925	9.82582	11.2748	38070056	VIT_209s0002g08160.1	VIT_209s0002g08160.1	PF00931	PTHR23155,PTHR23155:SF494	KOG4658			GO:0043531	AT3G14470.1		NB-ARC domain-containing disease resistance protein	K1
625	VIT_209s0002g08240	7.11096	8.40128	5.56077	5.61886	7.37145	8.28702	8.2225	9.6082	38069565	VIT_209s0002g08240.1	VIT_209s0002g08240.1	PF00931	PTHR23155,PTHR23155:SF494	KOG4658			GO:0043531	AT3G14470.1		NB-ARC domain-containing disease resistance protein	K1
626	VIT_209s0002g08270	14.1631	17.5973	15.5575	17.5957	16.0473	17.8451	12.2904	18.8738	38070718	VIT_209s0002g08270.1	VIT_209s0002g08270.1	PF13516,PF13855	PTHR24006,PTHR24006:SF451	KOG1947			GO:0005515	AT1G15740.1		Leucine-rich repeat family protein	K1
627	VIT_209s0002g08290	7.37496	8.52845	4.60207	4.71475	10.1499	10.0997	10.0258	11.6984	38069918	VIT_209s0002g08290.1	VIT_209s0002g08290.1	PF00931	PTHR23155,PTHR23155:SF494	KOG4658			GO:0043531	AT3G14470.1		NB-ARC domain-containing disease resistance protein	K1
628	VIT_209s0002g08660	7.26731	2.04677	4.53976	5.8215	10.8915	3.21265	2.47775	17.3719	38070234	VIT_209s0002g08660.1	VIT_209s0002g08660.1		PTHR24006	KOG1947		K10268		AT1G80570.2		RNI-like superfamily protein	K1
629	VIT_209s0002g08940	8.61189	8.69986	9.97885	8.26971	6.84535	8.26205	10.4481	8.40884	38071071	VIT_209s0002g08940.1	VIT_209s0002g08940.1	PF04096,PF12110	PTHR23198,PTHR23198:SF0	KOG0845		K14297	GO:0006810,GO:0005643	AT1G80680.1	MOS3,NUP96,PRE,SAR3	SUPPRESSOR OF AUXIN RESISTANCE 3	K1
630	VIT_209s0002g09050	7.6575	3.81893	2.56262	3.67743	6.98585	5.63384	4.72478	7.4419	38069732	VIT_209s0002g09050.1	VIT_209s0002g09050.1	PF02330	PTHR10826,PTHR10826:SF14	KOG2536		K15414	GO:0005759	AT1G15870.1		Mitochondrial glycoprotein family protein	K1
631	VIT_209s0018g01870	12.9473	7.94321	11.2145	10.5616	11.0831	8.55536	5.20508	12.93	38069488	VIT_209s0018g01870.1	VIT_209s0018g01870.1	PF07991,PF01842,PF00389	PTHR10996,PTHR10996:SF159		1.1.1.95	K00058	GO:0016597,GO:0008152,GO:0055114,GO:0051287,GO:0016616	AT1G17745.1	PGDH	D-3-phosphoglycerate dehydrogenase	K1
632	VIT_209s0018g01920	15.4688	14.8381	15.2449	15.979	19.1838	14.9647	18.9832	26.6499	38070067	VIT_209s0018g01920.1	VIT_209s0018g01920.1	PF08700,PF16528	PTHR21426,PTHR21426:SF14					AT5G49830.1	EXO84B	exocyst complex component 84B	K1
633	VIT_209s0054g00760	2.10457	1.72605	1.81214	2.22059	3.70081	1.47017	2.63168	3.50172	38071427	VIT_209s0054g00760.1	VIT_209s0054g00760.1		PTHR10887,PTHR10887:SF140					AT1G16800.1		P-loop containing nucleoside triphosphate hydrolases superfamily protein	K1
634	VIT_209s0054g00770	0.606046	0.126902	0.831478	1.75869	2.27654	0.202824	0.645493	2.05777	38071022	VIT_209s0054g00770.1	VIT_209s0054g00770.1							AT1G16800.1		P-loop containing nucleoside triphosphate hydrolases superfamily protein	K1
635	VIT_209s0054g01880	32.9507	37.9441	41.1556	41.009	28.9972	35.3519	38.3909	43.8069	38069730	VIT_209s0054g01880.1	VIT_209s0054g01880.1	PF00240	PTHR15204,PTHR15204:SF1	KOG4248			GO:0005515	AT5G42220.1		Ubiquitin-like superfamily protein	K1
636	VIT_209s0070g00370	18.636	22.4235	23.1431	21.9871	19.2605	16.9846	20.3068	24.8852	38070364	VIT_209s0070g00370.1	VIT_209s0070g00370.1		PTHR31515,PTHR31515:SF2		2.7.7.9			AT5G58100.1			K1
637	VIT_209s0070g00380	72.2867	65.816	29.3766	52.1487	257.723	71.357	49.1817	178.457	38070356	VIT_209s0070g00380.1	VIT_209s0070g00380.1	PF09229	PTHR13009,PTHR13009:SF5	KOG2936			GO:0051087,GO:0001671	AT5G58110.1		chaperone binding;ATPase activators	K1
638	VIT_210s0003g00270	20.5392	20.2483	18.9596	21.7765	19.9683	18.6019	19.0753	24.9864	38054630	VIT_210s0003g00270.1	VIT_210s0003g00270.1	PF15612,PF15613,PF15614,PF05066	PTHR36968,PTHR36968:SF1		2.3.1.48		GO:0006355,GO:0006351	AT1G28420.1	HB-1	homeobox-1	K1
639	VIT_210s0003g00290	8.8796	7.17752	8.10129	11.1188	11.5997	8.65274	10.065	14.5496	38054885	VIT_210s0003g00290.1	VIT_210s0003g00290.1	PF00046,PF02791	PTHR36968,PTHR36968:SF1	KOG0484			GO:0003677	AT5G44180.2		Homeodomain-like transcriptional regulator	K1
640	VIT_210s0003g00330	0.181739	0.101713	0.371038	0.137678	0.830696	0.167142	0.227133	0.693202	38053870	VIT_210s0003g00330.1	VIT_210s0003g00330.1	PF08263,PF13855,PF00069	PTHR27000,PTHR27000:SF219	KOG1187	2.7.11.1	K00924	GO:0005515,GO:0006468,GO:0005524,GO:0004672	AT1G28440.1	HSL1	HAESA-like 1	K1
641	VIT_210s0003g01580	5.83347	17.0471	14.3636	4.82742	106.768	10.1312	15.1525	88.021	38054961	VIT_210s0003g01580.1	VIT_210s0003g01580.1	PF07939	PTHR31865,PTHR31865:SF7					AT2G42760.1			K1
642	VIT_210s0003g01600	83.2367	85.5086	64.5657	67.3114	201.354	89.279	110.775	298.868	38054249	VIT_210s0003g01600.1	VIT_210s0003g01600.1	PF03106	PTHR31282,PTHR31282:SF9				GO:0043565,GO:0006355,GO:0003700	AT1G29280.1	ATWRKY65,WRKY65	WRKY DNA-binding protein 65	K1
643	VIT_210s0003g01880	3.0419	2.52073	2.95723	2.57039	3.04413	2.9339	2.44875	4.80973	38053677	VIT_210s0003g01880.1	VIT_210s0003g01880.1	PF07714,PF11721	PTHR27006,PTHR27006:SF3	KOG1187	2.7.11.1		GO:0006468,GO:0004672	AT1G29750.2	RKF1	receptor-like kinase in flowers 1	K1
644	VIT_210s0003g01960	17.3614	26.5336	22.2969	19.1529	24.2196	18.34	11.8561	37.224	38054168	VIT_210s0003g01960.1	VIT_210s0003g01960.1	PF07714,PF11721	PTHR27006,PTHR27006:SF45	KOG1187	2.7.11.1		GO:0006468,GO:0004672	AT1G07650.1		Leucine-rich repeat transmembrane protein kinase	K1
645	VIT_210s0003g02030	12.4716	28.5448	3.9961	3.45932	41.2037	12.0853	10.6625	67.5577	38054911	VIT_210s0003g02030.1	VIT_210s0003g02030.1	PF01823,PF00854	PTHR11654,PTHR11654:SF131			K14638	GO:0016020,GO:0006810,GO:0005215	AT1G29690.1	CAD1	MAC/Perforin domain-containing protein	K1
646	VIT_210s0003g02060	18.3733	22.063	19.0333	17.3301	44.9549	15.9194	19.8357	80.0619	38053919	VIT_210s0003g02060.1	VIT_210s0003g02060.1	PF12796,PF07714	PTHR23257,PTHR23257:SF378	KOG0192	2.7.11.1		GO:0006468,GO:0004672	AT4G18950.1		Integrin-linked protein kinase family	K1
647	VIT_210s0003g02150	7.08392	3.93369	1.69161	5.35878	9.49981	6.41488	5.01687	11.3407	38054644	VIT_210s0003g02150.1	VIT_210s0003g02150.1	PF00982	PTHR10788,PTHR10788:SF6		2.4.1.15		GO:0005992,GO:0003824	AT1G78580.1	ATTPS1,TPS1	trehalose-6-phosphate synthase	K1
648	VIT_210s0003g02700	9.36432	5.46669	5.42743	6.28672	18.5265	7.15625	7.69082	15.2681	38055266	VIT_210s0003g02700.1	VIT_210s0003g02700.1		PTHR17204,PTHR17204:SF18	KOG1258		K13217		AT5G46400.1	AT PRP39-2,PRP39-2	Tetratricopeptide repeat (TPR)-like superfamily protein	K1
649	VIT_210s0003g03030	0.398242	0.01759	0.198491	0	2.00512	0.419044	0.642257	1.94848	38053848	VIT_210s0003g03030.1	VIT_210s0003g03030.1	PF00999	PTHR32468,PTHR32468:SF26				GO:0055085,GO:0016021,GO:0015299,GO:0006812	AT2G13620.1	ATCHX15,CHX15	cation/hydrogen exchanger 15	K1
650	VIT_210s0003g03170	1.33216	3.07598	1.33404	1.7855	2.78553	1.10701	0.675613	3.54053	38054388	VIT_210s0003g03170.1	VIT_210s0003g03170.1	PF00067	PTHR24286,PTHR24286:SF0	KOG0157		K09832	GO:0055114,GO:0020037,GO:0016705,GO:0005506	AT2G34500.1	CYP710A1	cytochrome P450, family 710, subfamily A, polypeptide 1	K1
651	VIT_210s0003g03790	41.2546	11.4016	2.85035	0.396388	695.127	60.3559	31.9078	369.514	38054499	VIT_210s0003g03790.1	VIT_210s0003g03790.1	PF09425,PF06200	PTHR33077,PTHR33077:SF17					AT1G30135.1	JAZ8,TIFY5A	jasmonate-zim-domain protein 8	K1
652	VIT_210s0003g04070	12.7828	17.4098	11.3328	11.5882	13.3077	13.7145	13.184	18.8048	38053787	VIT_210s0003g04070.1	VIT_210s0003g04070.1	PF12706	PTHR12553,PTHR12553:SF7					AT1G30300.1		Metallo-hydrolase/oxidoreductase superfamily protein	K1
653	VIT_210s0003g04540	44.9123	19.7749	17.7245	21.9766	447.424	26.6822	15.4405	462.351	38054604	VIT_210s0003g04540.1	VIT_210s0003g04540.1	PF13906,PF13520	PTHR11785,PTHR11785:SF230	KOG1286		K03294	GO:0016020,GO:0015171,GO:0003333	AT4G21120.1	AAT1,CAT1	amino acid transporter 1	K1
654	VIT_210s0003g05000	52.8868	64.6852	53.7041	50.2181	73.2418	41.7585	49.0702	91.8815	38054851	VIT_210s0003g05000.1	VIT_210s0003g05000.1		PTHR20884,PTHR20884:SF9	KOG2720	2.7.7.69	K14190	GO:0080048	AT4G26850.1	VTC2	mannose-1-phosphate guanylyltransferase (GDP)s;GDP-galactose:mannose-1-phosphate guanylyltransferases;GDP-galactose:glucose-1-phosphate guanylyltransferases;GDP-galactose:myoinositol-1-phosphate guanylyltransferases;glucose-1-phosphate guanylyltransferase	K1
655	VIT_210s0003g05010	10.6681	14.0443	12.3696	14.1948	21.799	11.7051	9.83917	22.5318	38054026	VIT_210s0003g05010.1	VIT_210s0003g05010.1										K1
656	VIT_210s0003g05480	1.19149	1.15668	0.181383	0.149007	1.96164	0.722746	0.787694	1.80419	38054675	VIT_210s0003g05480.1	VIT_210s0003g05480.1	PF03765,PF00650	PTHR23324,PTHR23324:SF48	KOG1471				AT1G30690.1		Sec14p-like phosphatidylinositol transfer family protein	K1
657	VIT_210s0071g00130	0.443658	0.151721	0.696925	0	0.948849	0.164408	0.168042	1.08343	38054928	VIT_210s0071g00130.1	VIT_210s0071g00130.1	PF00931	PTHR23155,PTHR23155:SF543				GO:0043531	AT5G66900.1		Disease resistance protein (CC-NBS-LRR class) family	K1
658	VIT_210s0071g00300	27.4075	24.5571	3.35423	2.29431	158.026	25.2666	23.2028	191.316	38054862	VIT_210s0071g00300.1	VIT_210s0071g00300.1	PF05705	PTHR12265,PTHR12265:SF0	KOG2521				AT3G19970.1		alpha/beta-Hydrolases superfamily protein	K1
659	VIT_210s0092g00230	35.8106	43.5218	30.2755	38.5148	32.0317	30.4816	33.6383	40.7107	38054243	VIT_210s0092g00230.1	VIT_210s0092g00230.1	PF06943	PTHR31747,PTHR31747:SF3					AT4G20380.2	LSD1	LSD1 zinc finger family protein	K1
660	VIT_210s0092g00350	11.8558	12.239	10.7344	12.4184	10.8434	10.1188	11.9654	14.5422	38053626	VIT_210s0092g00350.1	VIT_210s0092g00350.1	PF10475,PF07928	PTHR12965,PTHR12965:SF0			K17600	GO:0042147	AT4G19490.1	ATVPS54,VPS54	VPS54	K1
661	VIT_210s0116g00490	11.3494	4.68794	5.90246	10.3012	19.7652	9.85906	9.37165	17.7933	38044808	VIT_210s0116g00490.1	VIT_210s0116g00490.1		PTHR12609					AT2G35630.1	GEM1,MOR1	ARM repeat superfamily protein	K1
662	VIT_210s0116g00560	0.767252	0	0.0405717	0.121944	0.688813	0.116861	0.0198747	0.923578	38044794	VIT_210s0116g00560.1	VIT_210s0116g00560.1	PF00264,PF12143	PTHR11474,PTHR11474:SF33		1.10.3.1		GO:0016491,GO:0008152,GO:0055114,GO:0004097				K1
663	VIT_210s0116g00700	21.9885	31.745	22.4298	21.8618	51.1235	21.5372	24.9829	87.8912	38044815	VIT_210s0116g00700.1	VIT_210s0116g00700.1	PF00097,PF00271,PF00176	PTHR10799,PTHR10799:SF705		3.6.4.12		GO:0046872,GO:0005524	AT1G61140.3	EDA16	SNF2 domain-containing protein / helicase domain-containing protein / zinc finger protein-related	K1
664	VIT_210s0116g00760	18.035	40.9468	16.2446	14.3876	40.2758	20.3904	7.7524	37.2802	38053969	VIT_210s0116g00760.1	VIT_210s0116g00760.1	PF03151	PTHR11132,PTHR11132:SF56	KOG1441		K15283		AT1G61800.1	ATGPT2,GPT2	glucose-6-phosphate/phosphate translocator 2	K1
665	VIT_210s0116g00940	19.7484	8.05319	5.70846	6.25048	210.669	22.921	15.3162	211.414	38055172	VIT_210s0116g00940.1	VIT_210s0116g00940.1	PF14703,PF13967,PF02714	PTHR13018,PTHR13018:SF46				GO:0016020	AT4G22120.4		ERD (early-responsive to dehydration stress) family protein	K1
666	VIT_210s0116g00980	10.1459	8.25953	7.39179	8.50068	9.59468	10.4119	9.85118	10.6259	38053643	VIT_210s0116g00980.1	VIT_210s0116g00980.1	PF02485	PTHR31042,PTHR31042:SF2				GO:0016020,GO:0008375	AT1G62305.1		Core-2/I-branching beta-1,6-N-acetylglucosaminyltransferase family protein	K1
667	VIT_210s0116g01710	0.447866	0	0	0	2.68622	0.429463	1.1521	1.78067	38054517	VIT_210s0116g01710.1	VIT_210s0116g01710.1	PF13334,PF01762	PTHR11214,PTHR11214:SF109	KOG2288	2.4.1.134		GO:0016020,GO:0008378,GO:0006486	AT1G05170.2		Galactosyltransferase family protein	K1
668	VIT_210s0405g00030	29.4777	32.9084	20.205	23.9461	34.5179	29.2323	27.4606	35.7808	38053799	VIT_210s0405g00030.1	VIT_210s0405g00030.1	PF00459	PTHR20854,PTHR20854:SF4	KOG2951	3.1.3.93,3.1.3.25	K10047	GO:0046854	AT3G02870.1	VTC4	Inositol monophosphatase family protein	K1
669	VIT_210s0523g00020	9.33271	11.2539	14.8765	6.57546	8.02257	11.0224	6.31487	11.5979	38053961	VIT_210s0523g00020.1	VIT_210s0523g00020.1	PF13350	PTHR31126,PTHR31126:SF15	KOG1572	3.1.3.48	K18045		AT1G05000.1		Phosphotyrosine protein phosphatases superfamily protein	K1
670	VIT_210s0597g00020	7.26819	23.4053	6.13244	4.38829	19.9285	6.13716	11.721	24.6049	38053803	VIT_210s0597g00020.1	VIT_210s0597g00020.1	PF08590	PTHR13308,PTHR13308:SF17					AT3G15390.1	SDE5	silencing defective 5	K1
671	VIT_211s0016g00100	7.12144	8.42336	9.95394	7.96582	7.61081	6.36134	7.5886	8.17517	38066082	VIT_211s0016g00100.1	VIT_211s0016g00100.1	PF14429,PF06920	PTHR23317,PTHR23317:SF76				GO:0007264,GO:0005085	AT4G16340.1	SPK1	guanyl-nucleotide exchange factors;GTPase binding;GTP binding	K1
672	VIT_211s0016g00160	4.20406	4.25939	4.47416	4.96846	5.10143	4.6468	4.69319	6.30764	38058381	VIT_211s0016g00160.1	VIT_211s0016g00160.1	PF10409,PF02181	PTHR23213,PTHR23213:SF232	KOG2283				AT5G58160.1		actin binding	K1
673	VIT_211s0016g00370	15.8285	14.7607	16.0886	17.8326	12.7326	13.3422	16.8004	17.535	38065837	VIT_211s0016g00370.1	VIT_211s0016g00370.1	PF01388	PTHR22970,PTHR22970:SF21				GO:0003677	AT3G43240.1		ARID/BRIGHT DNA-binding domain-containing protein	K1
674	VIT_211s0016g00420	39.1798	35.0392	40.8283	36.4016	32.2308	35.5645	37.509	44.0788	38064781	VIT_211s0016g00420.1	VIT_211s0016g00420.1	PF07807,PF07808	PTHR12765,PTHR12765:SF5	KOG2498		K13109	GO:0005634	AT2G26460.1	SMU2	RED family protein	K1
675	VIT_211s0016g00440	28.6465	43.6078	41.4384	40.7683	72.4714	29.5865	38.7174	86.9802	38064162	VIT_211s0016g00440.1	VIT_211s0016g00440.1	PF02383	PTHR11200,PTHR11200:SF122				GO:0042578,GO:0036092,GO:0007033	AT3G43220.1		Phosphoinositide phosphatase family protein	K1
676	VIT_211s0016g00520	2.15218	3.39738	3.39873	2.18115	4.43286	3.28962	0.997449	6.90745	38064251	VIT_211s0016g00520.1	VIT_211s0016g00520.1	PF02519	PTHR31374,PTHR31374:SF22			K14488	GO:0009733	AT5G20810.1		SAUR-like auxin-responsive protein family	K1
677	VIT_211s0016g01700	13.8497	15.2109	9.58997	10.6476	16.7631	13.6847	11.1457	18.5832	38064978	VIT_211s0016g01700.1	VIT_211s0016g01700.1	PF10998	PTHR31201,PTHR31201:SF1	KOG2895				AT5G35460.1			K1
678	VIT_211s0016g01720	21.2805	27.125	24.209	20.6964	65.6792	24.793	18.6899	72.197	38064399	VIT_211s0016g01720.1	VIT_211s0016g01720.1	PF00291	PTHR10314,PTHR10314:SF125	KOG1251	4.2.3.1	K01733		AT4G29840.1	MTO2,TS	Pyridoxal-5\'-phosphate-dependent enzyme family protein	K1
679	VIT_211s0016g01930	13.5194	16.8626	16.553	12.9098	24.2017	11.3717	12.1198	34.1202	38065026	VIT_211s0016g01930.1	VIT_211s0016g01930.1	PF03062	PTHR10408,PTHR10408:SF7	KOG0380	2.3.1.20	K11155	GO:0008374,GO:0019432,GO:0004144	AT2G19450.1	ABX45,AS11,ATDGAT,DGAT1,RDS1,TAG1	membrane bound O-acyl transferase (MBOAT) family protein	K1
680	VIT_211s0016g02050	66.4323	70.7635	56.1056	73.0913	73.3626	67.9247	72.5286	109.358	38064397	VIT_211s0016g02050.1	VIT_211s0016g02050.1	PF00956	PTHR11875,PTHR11875:SF73	KOG1507		K11279	GO:0006334,GO:0005634	AT2G19480.3	NAP1;2,NFA02,NFA2	nucleosome assembly protein 1;2	K1
681	VIT_211s0016g02126	74.5106	19.4425	22.8757	26.6758	241.518	30.502	39.4105	205.227	38063921	VIT_211s0016g02126.1	VIT_211s0016g02126.1	PF14364,PF05553	PTHR33098,PTHR33098:SF13					AT4G26130.1			K1
682	VIT_211s0016g02340	17.3561	11.5935	17.3751	14.9498	93.4582	11.9161	7.11351	59.8541	38065412	VIT_211s0016g02340.1	VIT_211s0016g02340.1	PF00383,PF08211	PTHR11644,PTHR11644:SF2	KOG0833	3.5.4.5	K01489	GO:0008270,GO:0009972,GO:0004126	AT2G19570.1	AT-CDA1,CDA1,DESZ	cytidine deaminase 1	K1
683	VIT_211s0016g02490	30.0019	18.1891	27.0686	32.7472	41.1789	25.4758	23.6095	48.4277	38066127	VIT_211s0016g02490.1	VIT_211s0016g02490.1	PF03096	PTHR11034,PTHR11034:SF23	KOG2931				AT5G56750.1	NDL1	N-MYC downregulated-like 1	K1
684	VIT_211s0016g02580	48.1418	36.6514	23.9241	21.4454	103.617	60.2546	74.8991	116.158	38064591	VIT_211s0016g02580.1	VIT_211s0016g02580.1	PF03398	PTHR12161,PTHR12161:SF13					AT2G19710.1		Regulator of Vps4 activity in the MVB pathway protein	K1
685	VIT_211s0016g02830	70.2418	25.6806	27.9046	30.243	164.717	70.6253	81.7047	201.516	38064561	VIT_211s0016g02830.1	VIT_211s0016g02830.1	PF01019	PTHR11686,PTHR11686:SF29		2.3.2.15,3.4.19.13,2.3.2.2	K18592	GO:0006749,GO:0003840	AT4G29210.1	GGT3,GGT4	gamma-glutamyl transpeptidase 4	K1
686	VIT_211s0016g02850	45.162	71.3693	44.5856	45.6642	253.554	51.1255	39.8151	208.413	38065752	VIT_211s0016g02850.1	VIT_211s0016g02850.1	PF00365	PTHR13697,PTHR13697:SF7		2.7.1.11		GO:0006096,GO:0003872	AT4G26270.1	PFK3	phosphofructokinase 3	K1
687	VIT_211s0016g03130	10.9622	21.7149	15.1325	12.7972	22.1342	13.2014	14.1252	33.5679	38064076	VIT_211s0016g03130.1	VIT_211s0016g03130.1	PF13506	PTHR12726,PTHR12726:SF0	KOG2547			GO:0016757	AT2G19880.2		Nucleotide-diphospho-sugar transferases superfamily protein	K1
688	VIT_211s0016g03580	19.6857	47.6837	50.6127	30.093	41.0494	39.464	27.7595	58.3327	38065160	VIT_211s0016g03580.1	VIT_211s0016g03580.1	PF01048	PTHR21234,PTHR21234:SF19		3.2.2.9		GO:0009116,GO:0003824	AT4G28940.1		Phosphorylase superfamily protein	K1
689	VIT_211s0016g03660	45.4031	45.1571	43.2406	40.7769	46.8878	47.8336	47.1696	55.6965	38064144	VIT_211s0016g03660.1	VIT_211s0016g03660.1	PF07690	PTHR23503,PTHR23503:SF37	KOG0254			GO:0055085,GO:0016021	AT1G67300.1		Major facilitator superfamily protein	K1
690	VIT_211s0016g03720	18.3733	22.5224	22.6921	17.308	36.73	19.7457	17.49	31.288	38065570	VIT_211s0016g03720.1	VIT_211s0016g03720.1	PF00155	PTHR11879,PTHR11879:SF16		2.6.1.1	K14454	GO:0030170,GO:0009058,GO:0008483,GO:0006520	AT5G19550.1	AAT2,ASP2	aspartate aminotransferase 2	K1
691	VIT_211s0016g03810	0.208968	0.0326973	0.127089	0.0583763	3.11133	0.165669	0.287176	1.9321	38064519	VIT_211s0016g03810.1	VIT_211s0016g03810.1	PF03168	PTHR31852,PTHR31852:SF25					AT3G24600.1		Late embryogenesis abundant protein, group 2	K1
692	VIT_211s0016g03880	11.0719	10.7253	9.9365	7.90255	21.6867	11.4815	9.23047	20.4122	38064263	VIT_211s0016g03880.1	VIT_211s0016g03880.1	PF07714	PTHR27001,PTHR27001:SF89	KOG1187	2.7.11.1		GO:0006468,GO:0004672	AT3G24550.1	ATPERK1,PERK1	proline extensin-like receptor kinase 1	K1
693	VIT_211s0016g03900	9.90915	13.5811	3.9274	3.67258	55.0708	9.54251	14.0335	85.5347	38064357	VIT_211s0016g03900.1	VIT_211s0016g03900.1	PF00004,PF12796	PTHR24193,PTHR24193:SF70	KOG4214			GO:0005524	AT3G24530.1		AAA-type ATPase family protein / ankyrin repeat family protein	K1
694	VIT_211s0016g04240	13.1058	19.8638	14.9159	16.9545	20.4934	13.1527	13.9295	26.6257	38064441	VIT_211s0016g04240.1	VIT_211s0016g04240.1	PF00041,PF07227	PTHR21736,PTHR21736:SF17				GO:0005515	AT3G24440.1	VIL1,VRN5	Fibronectin type III domain-containing protein	K1
695	VIT_211s0016g04420	22.8855	20.3627	21.7606	25.0093	51.2637	21.4909	24.0874	41.7453	38063725	VIT_211s0016g04420.1	VIT_211s0016g04420.1	PF00226,PF14237	PTHR36983			K09533		AT2G26890.1	GRV2,KAM2	DNAJ heat shock N-terminal domain-containing protein	K1
696	VIT_211s0016g04480	23.1367	41.9024	41.138	20.2031	45.7693	25.8213	28.1413	57.4158	38064980	VIT_211s0016g04480.1	VIT_211s0016g04480.1	PF12590,PF01643	PTHR31727,PTHR31727:SF2		3.1.2.14		GO:0016790,GO:0006633	AT1G08510.1	FATB	fatty acyl-ACP thioesterases B	K1
697	VIT_211s0016g04730	27.7509	26.0782	22.0182	20.4199	25.0571	19.4032	18.7536	37.1314	38065980	VIT_211s0016g04730.1	VIT_211s0016g04730.1	PF12906	PTHR23012,PTHR23012:SF54	KOG1609	6.3.2.19		GO:0008270	AT1G11020.1		RING/FYVE/PHD zinc finger superfamily protein	K1
698	VIT_211s0016g04740	0.035136	0	0	0	0.441977	0.0875273	0.0219277	0.796739	38065361	VIT_211s0016g04740.1	VIT_211s0016g04740.1	PF00955	PTHR11453,PTHR11453:SF48				GO:0016021,GO:0006820,GO:0016020,GO:0005452	AT1G15460.1	ATBOR4,BOR4	HCO3- transporter family	K1
699	VIT_211s0016g04760	104.848	91.1091	35.5777	43.5222	507.732	130.912	74.6825	472.3	38064973	VIT_211s0016g04760.1	VIT_211s0016g04760.1		PTHR34198					AT1G52720.1			K1
700	VIT_211s0016g05060	24.5574	20.217	10.2223	12.7495	50.533	21.4153	13.4252	87.5934	38064904	VIT_211s0016g05060.1	VIT_211s0016g05060.1	PF01636	PTHR22603,PTHR22603:SF24	KOG2686	2.7.1.82	K00894		AT2G26830.1	emb1187	Protein kinase superfamily protein	K1
701	VIT_211s0016g05070	28.3724	12.2954	5.83531	11.5985	38.4415	18.4068	7.48822	67.4303	38066068	VIT_211s0016g05070.1	VIT_211s0016g05070.1		PTHR22603,PTHR22603:SF24		2.7.1.82			AT2G26830.1	emb1187	Protein kinase superfamily protein	K1
702	VIT_211s0016g05530	0.716587	0.986441	0	1.62529	6.03391	0.243184	0.459828	5.15059	38065036	VIT_211s0016g05530.1	VIT_211s0016g05530.1	PF02298	PTHR33021,PTHR33021:SF30				GO:0009055	AT5G20230.1	ATBCB,BCB,SAG14	blue-copper-binding protein	K1
703	VIT_211s0016g05560	19.3322	29.1386	25.3109	19.5642	33.9811	25.0455	21.6709	45.7853	38064097	VIT_211s0016g05560.1	VIT_211s0016g05560.1	PF00332	PTHR32227,PTHR32227:SF129		3.2.1.39		GO:0005975,GO:0004553	AT2G26600.1		Glycosyl hydrolase superfamily protein	K1
704	VIT_211s0016g05620	18.4703	20.6655	23.2386	23.471	19.6118	17.9757	25.2352	24.8525	38065472	VIT_211s0016g05620.1	VIT_211s0016g05620.1	PF00400	PTHR22847,PTHR22847:SF499	KOG0266			GO:0005515	AT3G15880.2	TPR4,WSIP2	WUS-interacting protein 2	K1
705	VIT_211s0037g00090	33.0934	33.2565	26.7015	31.3506	29.5823	29.3806	29.0568	40.4144	38065994	VIT_211s0037g00090.1	VIT_211s0037g00090.1	PF04641	PTHR12775	KOG3113				AT5G58020.1			K1
706	VIT_211s0037g00210	95.5466	92.9646	89.5976	95.9188	89.6071	84.4476	79.4494	135.075	38065714	VIT_211s0037g00210.1	VIT_211s0037g00210.1	PF02990	PTHR10766,PTHR10766:SF37			K17086	GO:0016021	AT2G24170.1		Endomembrane protein 70 protein family	K1
707	VIT_211s0037g00610	4.76469	3.28023	4.13858	5.73197	3.97347	3.92564	3.24185	6.52946	38065227	VIT_211s0037g00610.1	VIT_211s0037g00610.1	PF04576	PTHR31422,PTHR31422:SF1					AT5G57830.1		Protein of unknown function, DUF593	K1
708	VIT_211s0037g00630	7.40264	2.01868	2.70182	3.58654	9.91763	4.60326	4.34122	8.27365	38063762	VIT_211s0037g00630.1	VIT_211s0037g00630.1	PF14700,PF00940	PTHR10102,PTHR10102:SF1		2.7.7.6	K10908	GO:0006351,GO:0003899,GO:0003677	AT2G24120.1	PDE319,SCA3	DNA/RNA polymerases superfamily protein	K1
709	VIT_211s0037g00860	12.9377	17.6616	12.9713	10.5315	49.901	21.943	20.4699	48.0988	38065330	VIT_211s0037g00860.1	VIT_211s0037g00860.1	PF03006	PTHR20855,PTHR20855:SF47	KOG0748		K07297	GO:0016021	AT4G30850.1	HHP2	heptahelical transmembrane protein2	K1
710	VIT_211s0037g01040	14.6341	12.9094	17.0586	9.81741	17.6845	11.4272	9.31036	18.5523	38065263	VIT_211s0037g01040.1	VIT_211s0037g01040.1	PF05761	PTHR12103,PTHR12103:SF12		3.1.3.5			AT2G23890.1		HAD-superfamily hydrolase, subfamily IG, 5\'-nucleotidase	K1
711	VIT_211s0052g00070	3.42122	2.78106	3.05759	3.60631	3.05701	2.92496	2.76133	3.5236	38065576	VIT_211s0052g00070.1	VIT_211s0052g00070.1	PF12738,PF04679,PF04675,PF01068	PTHR10459,PTHR10459:SF72		6.5.1.1	K10777	GO:0006310,GO:0006281,GO:0003910,GO:0003677,GO:0005524	AT5G57160.1	ATLIG4,LIG4	DNA ligase IV	K1
712	VIT_211s0052g00090	105.766	5.89577	2.55235	2.9085	165.227	103.948	107.279	136.354	38065391	VIT_211s0052g00090.1	VIT_211s0052g00090.1	PF05634	PTHR10388,PTHR10388:SF17				GO:0003723	AT5G61930.2	APO3	Arabidopsis thaliana protein of unknown function (DUF794)	K1
713	VIT_211s0052g00100	457.314	160.951	28.8301	14.4169	1541.55	607.06	720.928	1447.25	38064260	VIT_211s0052g00100.1	VIT_211s0052g00100.1	PF00010	PTHR31945,PTHR31945:SF9				GO:0046983	AT5G57150.1		basic helix-loop-helix (bHLH) DNA-binding superfamily protein	K1
714	VIT_211s0052g00175	2.36333	0	0	0	19.1873	1.15066	0	25.8039	38065242	VIT_211s0052g00175.1	VIT_211s0052g00175.1										K1
715	VIT_211s0052g00320	11.2843	12.9365	12.1044	12.8096	10.8588	9.19426	12.0274	16.0332	38063975	VIT_211s0052g00320.1	VIT_211s0052g00320.1	PF00690,PF12515,PF00702,PF00122,PF00689	PTHR24093,PTHR24093:SF359		3.6.3.8	K01537	GO:0005516,GO:0046872,GO:0000166	AT4G29900.1	ACA10,ATACA10,CIF1	autoinhibited Ca(2+)-ATPase 10	K1
716	VIT_211s0052g00590	38.2772	50.9591	36.1055	38.5306	71.7026	58.3426	36.485	74.8984	38064839	VIT_211s0052g00590.1	VIT_211s0052g00590.1	PF05915	PTHR15664	KOG4753				AT4G29850.1		Eukaryotic protein of unknown function (DUF872)	K1
717	VIT_211s0052g00670	10.7803	10.4364	9.66433	11.0773	9.9934	11.2998	12.6291	13.3077	38064148	VIT_211s0052g00670.1	VIT_211s0052g00670.1	PF02209,PF00626	PTHR11977,PTHR11977:SF47				GO:0007010,GO:0003779	AT4G30160.1	ATVLN4,VLN4	villin 4	K1
718	VIT_211s0052g00880	194.976	281.724	229.889	190.69	530.897	217.987	219.299	559.472	38064529	VIT_211s0052g00880.1	VIT_211s0052g00880.1	PF00175,PF00258,PF00667	PTHR19384,PTHR19384:SF79		1.6.2.4	K00327	GO:0055114,GO:0016491,GO:0010181	AT4G30210.2	AR2,ATR2	P450 reductase 2	K1
719	VIT_211s0052g01270	4.01288	2.3454	0	0.179269	3.46064	0.480161	2.01105	5.7669	38063937	VIT_211s0052g01270.1	VIT_211s0052g01270.1	PF06955,PF00722	PTHR31062,PTHR31062:SF32		2.4.1.207,3.2.1.151	K08235	GO:0048046,GO:0016762,GO:0006073,GO:0005618,GO:0005975,GO:0004553	AT4G25810.1	XTH23,XTR6	xyloglucan endotransglycosylase 6	K1
720	VIT_211s0052g01840	30.9719	39.6493	33.0569	33.1345	27.5856	33.5959	37.2235	36.7292	38064890	VIT_211s0052g01840.1	VIT_211s0052g01840.1	PF00781,PF00609	PTHR11255		2.7.1.107	K00901	GO:0016301,GO:0007205,GO:0004143	AT2G18730.1	ATDGK3,DGK3	diacylglycerol kinase 3	K1
721	VIT_211s0052g01850	23.6378	21.8842	27.1233	24.5477	19.5769	22.5101	25.035	30.0695	38065756	VIT_211s0052g01850.1	VIT_211s0052g01850.1	PF02002	PTHR13097,PTHR13097:SF7	KOG2593		K03136		AT1G03280.1		Transcription factor TFIIE, alpha subunit	K1
722	VIT_211s0065g00340	15.2891	15.8892	16.9918	18.8893	14.732	15.7153	18.9258	20.8944	38063749	VIT_211s0065g00340.1	VIT_211s0065g00340.1	PF00271,PF00270,PF08148,PF13234			3.6.4.13	K12598	GO:0005524,GO:0003676	AT2G06990.1	HEN2	RNA helicase, ATP-dependent, SK12/DOB1 protein	K1
723	VIT_211s0065g00470	16.0422	22.7425	20.8994	16.6516	33.1553	14.6913	15.8669	39.9953	38063792	VIT_211s0065g00470.1	VIT_211s0065g00470.1	PF07714	PTHR27001,PTHR27001:SF190	KOG1187	2.7.11.1		GO:0006468,GO:0004672	AT2G07180.1		Protein kinase superfamily protein	K1
724	VIT_211s0065g01090	15.7186	19.3424	16.2866	17.3073	16.6542	17.4404	21.1803	20.6495	38065284	VIT_211s0065g01090.1	VIT_211s0065g01090.1	PF00271,PF00270	PTHR24031,PTHR24031:SF78		3.6.4.13		GO:0005524,GO:0003676	AT5G60990.1		DEA(D/H)-box RNA helicase family protein	K1
725	VIT_211s0103g00230	8.91744	7.13434	7.44647	9.59211	11.367	9.05231	7.18975	11.3435	38065482	VIT_211s0103g00230.1	VIT_211s0103g00230.1	PF06862	PTHR12933	KOG2340		K14774	GO:0005634	AT1G17690.1	NOF1		K1
726	VIT_211s0103g00300	13.6347	9.4976	7.62172	10.5496	12.2604	11.6186	8.85968	13.0474	38064029	VIT_211s0103g00300.1	VIT_211s0103g00300.1		PTHR12289,PTHR12289:SF38	KOG3028		K17776		AT2G19080.1		metaxin-related	K1
727	VIT_211s0103g00570	27.4798	45.7809	37.4273	28.7126	47.4266	39.7705	29.5945	47.5433	38065369	VIT_211s0103g00570.1	VIT_211s0103g00570.1	PF00566	PTHR22957,PTHR22957:SF28			K18469		AT4G29950.1		Ypt/Rab-GAP domain of gyp1p superfamily protein	K1
728	VIT_211s0118g00710	6.92045	4.83617	2.18023	3.75386	7.67279	4.80494	3.36556	7.8547	38065009	VIT_211s0118g00710.1	VIT_211s0118g00710.1	PF07690	PTHR11662,PTHR11662:SF153	KOG2533		K13783	GO:0055085,GO:0016021	AT2G13100.1		Major facilitator superfamily protein	K1
729	VIT_211s0118g00800	179.032	182.497	169.145	154.867	207.616	185.114	173.921	270.461	38063995	VIT_211s0118g00800.1	VIT_211s0118g00800.1	PF03789,PF05920,PF03790,PF03791	PTHR11850,PTHR11850:SF122	KOG0773			GO:0003677,GO:0006355,GO:0005634	AT5G25220.1	KNAT3	KNOTTED1-like homeobox gene 3	K1
730	VIT_211s0149g00090	2.1296	1.98803	1.42355	1.91088	2.6403	1.66487	1.73792	3.18004	38063777	VIT_211s0149g00090.1	VIT_211s0149g00090.1	PF08263,PF00560,PF07714,PF13855	PTHR27000,PTHR27000:SF181	KOG1187	2.7.11.1		GO:0005515,GO:0006468,GO:0004672	AT5G51350.1		Leucine-rich repeat transmembrane protein kinase family protein	K1
731	VIT_211s0149g00330	1.18644	0.339767	0.204946	0.440214	2.31797	1.00378	0.379802	2.92983	38066123	VIT_211s0149g00330.1	VIT_211s0149g00330.1	PF00704	PTHR11177,PTHR11177:SF219				GO:0005975,GO:0004553	AT4G19810.1		Glycosyl hydrolase family protein with chitinase insertion domain	K1
732	VIT_212s0028g00350	30.2785	35.1793	35.2058	30.5356	25.6123	27.4081	32.4348	34.2106	38043817	VIT_212s0028g00350.1	VIT_212s0028g00350.1	PF00118	PTHR11353			K09497	GO:0005524	AT1G24510.1		TCP-1/cpn60 chaperonin family protein	K1
733	VIT_212s0028g00610	8.47204	27.3625	4.83326	3.06722	27.9584	10.2572	12.8362	39.9021	38043092	VIT_212s0028g00610.1	VIT_212s0028g00610.1	PF00026	PTHR13683,PTHR13683:SF250	KOG1339	3.4.23.12		GO:0006508,GO:0004190	AT3G59080.1		Eukaryotic aspartyl protease family protein	K1
734	VIT_212s0028g00930	75.3422	84.8751	83.3167	62.9375	205.822	85.2576	42.4823	234.374	38043589	VIT_212s0028g00930.1	VIT_212s0028g00930.1	PF02798,PF00043	PTHR11260,PTHR11260:SF287	KOG0867	2.5.1.18	K00799	GO:0005515	AT2G30860.1	ATGSTF7,ATGSTF9,GLUTTR,GSTF9	glutathione S-transferase PHI 9	K1
735	VIT_212s0028g01170	10.9371	11.2942	14.0802	12.7984	15.5279	10.7389	13.7906	15.7711	38044005	VIT_212s0028g01170.1	VIT_212s0028g01170.1	PF02309,PF02362,PF06507	PTHR31384,PTHR31384:SF3				GO:0006355,GO:0005634,GO:0003677,GO:0009725	AT1G30330.1	ARF6	auxin response factor 6	K1
736	VIT_212s0028g02960	57.5942	41.0793	46.6225	49.8213	67.3229	43.9312	39.2014	75.2903	38042282	VIT_212s0028g02960.1	VIT_212s0028g02960.1							AT3G54680.1		proteophosphoglycan-related	K1
737	VIT_212s0028g03190	0.958719	0	0.603415	0.403553	1.40962	0.58289	0.158973	1.2687	38043883	VIT_212s0028g03190.1	VIT_212s0028g03190.1	PF02453	PTHR10994	KOG1792				AT2G20590.1		Reticulon family protein	K1
738	VIT_212s0028g03560	3.89632	0.596917	0.254683	1.20942	8.78783	4.51543	6.32675	9.35332	38043766	VIT_212s0028g03560.1	VIT_212s0028g03560.1	PF04720	PTHR31579,PTHR31579:SF2					AT4G32480.1		Protein of unknown function (DUF506)	K1
739	VIT_212s0028g03720	22.7875	35.3995	19.8538	20.9905	72.7809	25.655	32.0329	110.089	38044753	VIT_212s0028g03720.1	VIT_212s0028g03720.1	PF14288,PF02364	PTHR12741,PTHR12741:SF14		2.4.1.34		GO:0016020,GO:0006075,GO:0003843,GO:0000148	AT4G03550.1	ATGSL05,ATGSL5,GSL05,GSL5,PMR4	glucan synthase-like 5	K1
740	VIT_212s0028g03770	28.7064	34.072	35.3259	35.4913	26.5873	28.4542	35.9946	39.3957	38043918	VIT_212s0028g03770.1	VIT_212s0028g03770.1	PF04567,PF04566,PF04565,PF04560,PF04561,PF04563,PF00562	PTHR20856,PTHR20856:SF7		2.7.7.6	K03010	GO:0006351,GO:0003899,GO:0003677,GO:0032549	AT4G21710.1	EMB1989,NRPB2,RPB2	DNA-directed RNA polymerase family protein	K1
741	VIT_212s0028g03800	53.0714	74.1551	30.5797	21.1437	85.8063	69.1326	71.848	125.599	38042912	VIT_212s0028g03800.1	VIT_212s0028g03800.1		PTHR31533,PTHR31533:SF2					AT5G56170.1	LLG1	LORELEI-LIKE-GPI-ANCHORED PROTEIN 1	K1
742	VIT_212s0028g03940	17.2404	16.929	17.8398	21.6075	23.9294	17.7898	19.9546	23.8849	38043138	VIT_212s0028g03940.1	VIT_212s0028g03940.1	PF00240,PF09247,PF00439,PF12157	PTHR13900,PTHR13900:SF0			K03125	GO:0005515	AT1G32750.1	GTD1,HAC13,HAF01,HAF1,TAF1	HAC13 protein (HAC13)	K1
743	VIT_212s0034g01790	27.8391	59.8198	52.2891	39.821	46.3766	37.152	43.7077	59.4048	38043218	VIT_212s0034g01790.1	VIT_212s0034g01790.1	PF02493,PF01504	PTHR23086,PTHR23086:SF25	KOG0229	2.7.1.68	K00889	GO:0046488,GO:0016307	AT1G60890.1		Phosphatidylinositol-4-phosphate 5-kinase family protein	K1
744	VIT_212s0034g01810	11.4915	11.1723	11.0878	14.2722	13.8062	10.9762	11.9157	16.6988	38044505	VIT_212s0034g01810.1	VIT_212s0034g01810.1	PF13532	PTHR31447,PTHR31447:SF3	KOG4176		K10767		AT2G17970.1		2-oxoglutarate (2OG) and Fe(II)-dependent oxygenase superfamily protein	K1
745	VIT_212s0034g01820	4.00719	3.54355	3.51215	3.02256	4.2772	2.60675	5.13508	4.94181	38044344	VIT_212s0034g01820.1	VIT_212s0034g01820.1	PF13041	PTHR24015,PTHR24015:SF367					AT1G10910.1		Pentatricopeptide repeat (PPR) superfamily protein	K1
746	VIT_212s0034g01980	18.5029	0	6.20306	1.46413	304.599	24.1716	15.0704	142.447	38042498	VIT_212s0034g01980.1	VIT_212s0034g01980.1	PF00190	PTHR31189,PTHR31189:SF0				GO:0045735	AT1G07750.1		RmlC-like cupins superfamily protein	K1
747	VIT_212s0034g02000	21.1624	14.9993	5.87522	4.2888	323.188	41.8247	5.12615	167.632	38042709	VIT_212s0034g02000.1	VIT_212s0034g02000.1	PF00190	PTHR31189,PTHR31189:SF0				GO:0045735	AT1G07750.1		RmlC-like cupins superfamily protein	K1
748	VIT_212s0034g02230	15.79	11.9483	12.4562	16.0263	18.4842	13.3699	14.1502	18.9457	38042309	VIT_212s0034g02230.1	VIT_212s0034g02230.1	PF06427	PTHR11226,PTHR11226:SF0			K11718	GO:0006486,GO:0003980	AT1G71220.2	EBS1,PSL2,UGGT	UDP-glucose:glycoprotein glucosyltransferases;transferases, transferring hexosyl groups;transferases, transferring glycosyl groups	K1
749	VIT_212s0034g02390	64.9692	114.841	149.648	94.8334	155.676	115.662	130.075	207.851	38043991	VIT_212s0034g02390.1	VIT_212s0034g02390.1	PF05794	PTHR12832,PTHR12832:SF20	KOG1981				AT1G22930.1		T-complex protein 11	K1
750	VIT_212s0034g02400	0.256778	0.462127	0.419494	0.227204	0.857423	0.268333	0.276498	1.41167	38043063	VIT_212s0034g02400.1	VIT_212s0034g02400.1	PF00931	PTHR23155,PTHR23155:SF414	KOG4658			GO:0043531	AT3G14470.1		NB-ARC domain-containing disease resistance protein	K1
751	VIT_212s0035g00380	28.6084	22.6529	34.3311	39.0136	34.9531	25.1879	29.4538	51.5376	38044219	VIT_212s0035g00380.1	VIT_212s0035g00380.1	PF00004,PF14363	PTHR23070,PTHR23070:SF42			K08900	GO:0005524	AT5G40010.1	AATP1	AAA-ATPase 1	K1
752	VIT_212s0035g00805	7.26472	13.647	12.2699	11.0644	8.82274	9.33611	10.3134	10.777	38042382	VIT_212s0035g00805.1	VIT_212s0035g00805.1	PF04408,PF07717	PTHR18934,PTHR18934:SF145		3.6.4.13		GO:0004386	AT1G58060.1		RNA helicase family protein	K1
753	VIT_212s0035g00960	3.23607	1.98248	3.0253	2.30873	2.75534	2.55266	2.81427	3.61743	38042865	VIT_212s0035g00960.1	VIT_212s0035g00960.1	PF01416	PTHR11142,PTHR11142:SF1		5.4.99.12		GO:0009982,GO:0009451,GO:0003723,GO:0001522	AT1G09800.1		Pseudouridine synthase family protein	K1
754	VIT_212s0035g01020	37.67	26.532	32.3605	28.9618	34.2052	24.1782	24.6303	46.5561	38044573	VIT_212s0035g01020.1	VIT_212s0035g01020.1	PF00297	PTHR11363,PTHR11363:SF6			K02925	GO:0006412,GO:0005840,GO:0005622,GO:0003735	AT1G61580.1	ARP2,RPL3B	R-protein L3 B	K1
755	VIT_212s0035g01830	46.3523	51.424	59.761	47.8741	41.0159	47.7398	55.6336	57.3519	38043002	VIT_212s0035g01830.1	VIT_212s0035g01830.1	PF06003		KOG3026			GO:0006397,GO:0005737,GO:0005634,GO:0003723	AT2G02570.1		nucleic acid binding;RNA binding	K1
756	VIT_212s0035g01840	25.4442	21.9572	23.0189	24.924	28.238	22.881	25.0058	31.093	38043854	VIT_212s0035g01840.1	VIT_212s0035g01840.1	PF13646,PF08623	PTHR12696			K17263		AT2G02560.2	ATCAND1,CAND1,ETA2,HVE,TIP120	cullin-associated and neddylation dissociated	K1
757	VIT_212s0035g01920	8.92037	3.47448	4.3586	3.98551	7.99028	4.37033	4.65808	8.4322	38042932	VIT_212s0035g01920.1	VIT_212s0035g01920.1	PF12847,PF00155	PTHR11751,PTHR11751:SF133		2.1.1.12	K08247	GO:0030170,GO:0009058	AT5G49810.1	MMT	methionine S-methyltransferase	K1
758	VIT_212s0035g02100	0.238828	0	0	0	1.24238	1.29342	1.34429	1.99757	38042777	VIT_212s0035g02100.1	VIT_212s0035g02100.1	PF13417	PTHR11260,PTHR11260:SF268	KOG0868	2.5.1.18	K01800	GO:0005515	AT2G02390.1	ATGSTZ1,GST18,GSTZ1	glutathione S-transferase zeta 1	K1
759	VIT_212s0035g02290	22.5037	15.7318	18.7943	21.3032	23.9467	23.2859	23.2079	26.9898	38043467	VIT_212s0035g02290.1	VIT_212s0035g02290.1	PF08161	PTHR21576,PTHR21576:SF2			K14794		AT2G34357.1		ARM repeat superfamily protein	K1
760	VIT_212s0055g00950	0.414609	0	0	0	0.528913	0.176122	0.0843783	0.436686	38043795	VIT_212s0055g00950.1	VIT_212s0055g00950.1	PF00069	PTHR27008,PTHR27008:SF47	KOG1187	2.7.11.1		GO:0006468,GO:0005524,GO:0004672	AT2G26730.1		Leucine-rich repeat protein kinase family protein	K1
761	VIT_212s0055g01030	2.49531	14.4532	0.490849	0	18.7546	1.70723	1.40342	15.8658	38043018	VIT_212s0055g01030.1	VIT_212s0055g01030.1	PF00141	PTHR31235,PTHR31235:SF27		1.11.1.7	K00430	GO:0055114,GO:0020037,GO:0006979,GO:0004601	AT5G64120.1		Peroxidase superfamily protein	K1
762	VIT_212s0055g01280	8.07226	13.9681	14.1901	9.17905	13.6339	11.1169	9.40228	19.6528	38043510	VIT_212s0055g01280.1	VIT_212s0055g01280.1	PF00069	PTHR27001,PTHR27001:SF1	KOG2345,KOG0580	2.7.11.1,2.7.10.1		GO:0006468,GO:0005524,GO:0004672	AT4G33430.1	ATBAK1,ATSERK3,BAK1,ELG,RKS10,SERK3	BRI1-associated receptor kinase	K1
763	VIT_212s0057g00060	1.41989	13.155	6.79068	0.376746	24.4143	2.06382	6.07019	35.6398	38043304	VIT_212s0057g00060.1	VIT_212s0057g00060.1	PF12609	PTHR33090					AT4G10270.1		Wound-responsive family protein	K1
764	VIT_212s0057g00520	54.2351	23.0743	10.3256	5.90917	84.2643	44.7087	51.8239	143.896	38044333	VIT_212s0057g00520.1	VIT_212s0057g00520.1	PF00069	PTHR13902,PTHR13902:SF60	KOG0198	2.7.11.1	K08867	GO:0006468,GO:0005524,GO:0004672	AT5G55560.1		Protein kinase superfamily protein	K1
765	VIT_212s0059g00280	18.0635	11.203	2.82663	5.1767	58.4092	16.1858	10.7166	67.9176	38043303	VIT_212s0059g00280.1	VIT_212s0059g00280.1	PF00847	PTHR31657,PTHR31657:SF9				GO:0006355,GO:0003700	AT2G20880.1		Integrase-type DNA-binding superfamily protein	K1
766	VIT_212s0059g00870	1.12229	0.13655	0.114255	0.457667	2.00645	0.556918	0.472415	2.356	38043919	VIT_212s0059g00870.1	VIT_212s0059g00870.1	PF00069	PTHR24361,PTHR24361:SF380	KOG0198	2.7.11.25		GO:0006468,GO:0005524,GO:0004672	AT5G55090.1	MAPKKK15	mitogen-activated protein kinase kinase kinase 15	K1
767	VIT_212s0059g01060	208.54	23.9359	24.8959	65.8966	660.411	146.104	29.2877	453.631	38042211	VIT_212s0059g01060.1	VIT_212s0059g01060.1	PF00067	PTHR24286,PTHR24286:SF49	KOG0157		K10528	GO:0055114,GO:0020037,GO:0016705,GO:0005506	AT4G15440.1	CYP74B2,HPL1	hydroperoxide lyase 1	K1
768	VIT_212s0059g01120	3.3066	4.13492	2.73121	4.24838	11.5615	3.63332	1.55239	14.7159	38043390	VIT_212s0059g01120.1	VIT_212s0059g01120.1	PF00636	PTHR14950,PTHR14950:SF29		3.1.26.3		GO:0006396,GO:0004525,GO:0003723	AT4G15417.1	ATRTL1,RTL1	RNAse II-like 1	K1
769	VIT_212s0059g01280	0.345843	0.367632	0.44723	0.447205	1.9733	0.117568	0.600157	1.61947	38043875	VIT_212s0059g01280.1	VIT_212s0059g01280.1	PF00860	PTHR11119,PTHR11119:SF46			K14611	GO:0055085,GO:0016020,GO:0006810,GO:0005215	AT2G05760.1		Xanthine/uracil permease family protein	K1
770	VIT_212s0059g01460	89.1041	94.7943	93.3645	71.2996	234.481	103.935	86.8866	212.768	38043802	VIT_212s0059g01460.1	VIT_212s0059g01460.1	PF00847	PTHR31677,PTHR31677:SF20			K09286	GO:0006355,GO:0003700	AT1G50640.1	ATERF3,ERF3	ethylene responsive element binding factor 3	K1
771	VIT_212s0059g01930	22.324	26.2696	22.2672	20.107	21.3618	22.9241	21.6421	27.9807	38044347	VIT_212s0059g01930.1	VIT_212s0059g01930.1	PF04144	PTHR10687,PTHR10687:SF22	KOG3088			GO:0016021,GO:0015031	AT1G61250.1	SC3	secretory carrier 3	K1
772	VIT_212s0059g02570	0.159051	0	0.033205	0	0.607529	0.068803	0.1331	0.788513	38044114	VIT_212s0059g02570.1	VIT_212s0059g02570.1	PF01657,PF07714	PTHR27002	KOG1187	2.7.11.1		GO:0006468,GO:0004672	AT4G23180.1	CRK10,RLK4	cysteine-rich RLK (RECEPTOR-like protein kinase) 10	K1
773	VIT_212s0134g00210	2.13849	2.32503	1.3778	1.52135	1.66051	0.971048	1.18514	1.96111	38042787	VIT_212s0134g00210.1	VIT_212s0134g00210.1	PF14432,PF13041	PTHR24015,PTHR24015:SF477					AT3G12770.1	MEF22	mitochondrial editing factor 22	K1
774	VIT_212s0134g00460	1.06222	1.37649	0.594555	0.623918	2.72835	1.22928	2.71356	5.04952	38043230	VIT_212s0134g00460.1	VIT_212s0134g00460.1	PF05623	PTHR32010,PTHR32010:SF9					AT1G15030.1		Protein of unknown function (DUF789)	K1
775	VIT_212s0142g00250	17.2638	22.764	14.4719	13.7247	15.4953	13.645	15.2539	19.8022	38019003	VIT_212s0142g00250.1	VIT_212s0142g00250.1	PF02705	PTHR30540,PTHR30540:SF8				GO:0071805,GO:0016020,GO:0015079	AT5G09400.1	KUP7	K+ uptake permease 7	K1
776	VIT_212s0142g00280	0.484901	0	0.0137437	0	0.465527	0.350114	0.360642	0.436578	38042170	VIT_212s0142g00280.1	VIT_212s0142g00280.1	PF02724	PTHR10507,PTHR10507:SF0			K06628	GO:0006270	AT3G25100.1	CDC45	cell division cycle 45	K1
777	VIT_212s0178g00160	0.0504347	0.610576	0.24346	0.213213	1.70922	0.462254	0.691669	2.40752	38043343	VIT_212s0178g00160.1	VIT_212s0178g00160.1		PTHR31827,PTHR31827:SF14					AT1G64140.1			K1
778	VIT_213s0019g00250	198.527	192.04	182.535	207.703	237.887	200.653	203.948	259.551	38053297	VIT_213s0019g00250.1	VIT_213s0019g00250.1	PF00276,PF03939	PTHR11620,PTHR11620:SF23	KOG1751		K02893	GO:0006412,GO:0005840,GO:0003735	AT3G55280.2	RPL23AB	ribosomal protein L23AB	K1
779	VIT_213s0019g00285	17.7443	19.5908	9.87556	20.1511	53.7345	16.676	27.6063	68.263	38052173	VIT_213s0019g00285.1	VIT_213s0019g00285.1		PTHR24222,PTHR24222:SF21					AT3G55320.1	PGP20	P-glycoprotein 20	K1
780	VIT_213s0019g00310	16.5255	19.3071	17.2071	17.6064	59.4427	15.9501	20.7362	47.3315	38052029	VIT_213s0019g00310.1	VIT_213s0019g00310.1	PF00005,PF00664	PTHR24222,PTHR24222:SF27			K05658	GO:0016887,GO:0005524,GO:0055085,GO:0042626,GO:0016021,GO:0006810	AT3G55320.1	PGP20	P-glycoprotein 20	K1
781	VIT_213s0019g00440	0.438119	0.256686	0.129777	0.20272	1.26835	0.89369	1.57788	1.50057	38051291	VIT_213s0019g00440.1	VIT_213s0019g00440.1	PF06136	PTHR31083,PTHR31083:SF4					AT5G59790.1		Domain of unknown function (DUF966)	K1
782	VIT_213s0019g00630	6.09447	5.66583	7.33869	10.6005	8.70833	6.53101	9.27976	14.8115	38051011	VIT_213s0019g00630.1	VIT_213s0019g00630.1	PF10650	PTHR21563	KOG4839				AT2G39580.1			K1
783	VIT_213s0019g01280	1.55758	0.812475	0.459328	0.146519	1.09665	0.787958	0.546885	1.90263	38052738	VIT_213s0019g01280.1	VIT_213s0019g01280.1	PF07649	PTHR13871,PTHR13871:SF33		2.7.1.107		GO:0055114,GO:0047134	AT2G16050.1		Cysteine/Histidine-rich C1 domain family protein	K1
784	VIT_213s0019g01340	0.944134	3.64761	0.73026	0.161884	2.31167	0.707201	0.976017	2.9376	38051112	VIT_213s0019g01340.1	VIT_213s0019g01340.1		PTHR13871,PTHR13871:SF33					AT2G16050.1		Cysteine/Histidine-rich C1 domain family protein	K1
785	VIT_213s0019g01880	1.08463	1.35212	0.907418	1.32352	2.44809	1.10704	1.77908	3.1069	38066202	VIT_213s0019g01880.1	VIT_213s0019g01880.1	PF13855,PF00931	PTHR23155,PTHR23155:SF563	KOG4658			GO:0005515,GO:0043531	AT3G14460.1		LRR and NB-ARC domains-containing disease resistance protein	K1
786	VIT_213s0019g01950	2.31496	2.21677	2.11287	2.09862	3.30336	2.41958	2.89361	5.36399	38066258	VIT_213s0019g01950.1	VIT_213s0019g01950.1	PF00931	PTHR23155,PTHR23155:SF563	KOG4658			GO:0043531	AT3G14460.1		LRR and NB-ARC domains-containing disease resistance protein	K1
787	VIT_213s0019g02200	251.338	50.1344	66.7754	120.86	450.001	172.558	99.266	378.01	38051128	VIT_213s0019g02200.1	VIT_213s0019g02200.1	PF00481	PTHR13832,PTHR13832:SF219	KOG0698	3.1.3.16	K14497	GO:0003824,GO:0006470,GO:0004722	AT3G11410.1	AHG3,ATPP2CA,PP2CA	protein phosphatase 2CA	K1
788	VIT_213s0019g03280	18.1151	8.81331	12.4272	15.8265	18.0956	10.5553	8.67248	25.0339	38052810	VIT_213s0019g03280.1	VIT_213s0019g03280.1	PF00412	PTHR24206	KOG1700		K09377	GO:0008270	AT3G55770.5		GATA type zinc finger transcription factor family protein	K1
789	VIT_213s0019g03360	0.465072	0	0.134617	0.08646	0.442948	0.138727	0.074455	0.469334	38052655	VIT_213s0019g03360.1	VIT_213s0019g03360.1	PF07732,PF07731,PF00394	PTHR11709,PTHR11709:SF103		1.10.3.2	K05909	GO:0005507,GO:0055114,GO:0016491	AT2G38080.1	ATLMCO4,IRX12,LAC4,LMCO4	Laccase/Diphenol oxidase family protein	K1
790	VIT_213s0019g03550	21.8065	34.5541	48.2941	31.2807	51.0137	39.9347	31.5284	55.0535	38053472	VIT_213s0019g03550.1	VIT_213s0019g03550.1	PF00847	PTHR32467,PTHR32467:SF29			K09284	GO:0006355,GO:0003700,GO:0007275	AT2G28550.3	RAP2.7,TOE1	related to AP2.7	K1
791	VIT_213s0019g03910	13.9327	11.4903	9.64603	11.4101	32.2544	21.1042	22.7612	45.0093	38051768	VIT_213s0019g03910.1	VIT_213s0019g03910.1		PTHR34130,PTHR34130:SF3					AT4G30230.1			K1
792	VIT_213s0019g04010	48.6385	71.6075	58.7174	55.4499	85.2314	55.6218	63.9989	78.8717	38052997	VIT_213s0019g04010.1	VIT_213s0019g04010.1	PF00249	PTHR13992	KOG1878		K04650		AT3G52250.1		Duplicated homeodomain-like superfamily protein	K1
793	VIT_213s0019g04100	2.93291	8.55481	10.3921	7.08647	6.90891	3.55101	8.39218	9.02819	38051961	VIT_213s0019g04100.1	VIT_213s0019g04100.1	PF13639	PTHR22937,PTHR22937:SF64				GO:0008270,GO:0005515	AT2G37150.3		RING/U-box superfamily protein	K1
794	VIT_213s0019g04350	11.4563	14.2867	12.6112	11.4988	11.1273	11.0038	12.9563	13.7029	38051429	VIT_213s0019g04350.1	VIT_213s0019g04350.1	PF04389	PTHR12147,PTHR12147:SF6	KOG2194				AT5G20660.1		Zn-dependent exopeptidases superfamily protein	K1
795	VIT_213s0019g04370	14.7691	13.5968	14.0861	15.8004	13.8469	11.8165	12.1293	15.632	38053354	VIT_213s0019g04370.1	VIT_213s0019g04370.1	PF02880,PF02879,PF02878	PTHR22573,PTHR22573:SF18	KOG1220	5.4.2.8,5.4.2.2		GO:0016868,GO:0005975	AT5G17530.3		phosphoglucosamine mutase family protein	K1
796	VIT_213s0019g04770	29.19	28.4427	30.7333	33.2469	30.797	31.972	30.9818	36.3123	38053551	VIT_213s0019g04770.1	VIT_213s0019g04770.1	PF04048	PTHR14146	KOG3691		K06111	GO:0015031,GO:0006904,GO:0000145	AT3G10380.1	ATSEC8,SEC8	subunit of exocyst complex 8	K1
797	VIT_213s0019g05240	174.895	245.313	193.288	171.099	396.755	195.254	197.958	361.161	38053217	VIT_213s0019g05240.1	VIT_213s0019g05240.1							AT5G04410.1	anac078,NAC2	NAC domain containing protein 2	K1
798	VIT_213s0019g05360	19.204	25.4258	17.7495	22.0752	15.6839	14.6487	19.5247	21.4153	38052302	VIT_213s0019g05360.1	VIT_213s0019g05360.1	PF00013	PTHR10288,PTHR10288:SF142	KOG2191		K14944	GO:0003723	AT5G04430.1	BTR1,BTR1L,BTR1S	binding to TOMV RNA 1L (long form)	K1
799	VIT_213s0019g05390	19.7628	21.7854	23.1969	24.4821	19.9384	19.5257	22.8055	27.2492	38051779	VIT_213s0019g05390.1	VIT_213s0019g05390.1	PF13920	PTHR10044,PTHR10044:SF127	KOG4172	6.3.2.19			AT5G04460.1		RING/U-box superfamily protein	K1
800	VIT_213s0047g01060	3.58118	0	2.23547	2.98932	6.80536	2.36943	4.51652	13.9482	38051903	VIT_213s0047g01060.1	VIT_213s0047g01060.1										K1
801	VIT_213s0047g01150	4.20914	4.7808	6.13366	6.74502	5.7651	3.64117	4.3854	5.78599	38052469	VIT_213s0047g01150.1	VIT_213s0047g01150.1	PF07819	PTHR15495,PTHR15495:SF7				GO:0016788,GO:0006886,GO:0006505	AT3G27325.2		hydrolases, acting on ester bonds	K1
802	VIT_213s0064g00050	31.0407	34.4146	23.3653	20.26	179.939	27.0175	21.8686	122.432	38052817	VIT_213s0064g00050.1	VIT_213s0064g00050.1	PF13522,PF01380	PTHR10937,PTHR10937:SF0		2.6.1.16	K00820	GO:0030246,GO:0005975,GO:1901137,GO:0004360	AT3G24090.1		glutamine-fructose-6-phosphate transaminase (isomerizing)s;sugar binding;transaminases	K1
803	VIT_213s0064g00060	0.128241	0.341092	0.352865	0.294924	0.700825	0.289298	0.524613	0.659051	38051735	VIT_213s0064g00060.1	VIT_213s0064g00060.1	PF13191,PF00931	PTHR23155,PTHR23155:SF560	KOG4658			GO:0043531	AT3G14460.1		LRR and NB-ARC domains-containing disease resistance protein	K1
804	VIT_213s0064g00180	2.76939	4.26663	5.1618	5.09455	3.27046	3.20169	4.01777	5.40195	38051792	VIT_213s0064g00180.1	VIT_213s0064g00180.1	PF02463	PTHR19306,PTHR19306:SF1				GO:0030915,GO:0006281,GO:0000724	AT5G15920.1	SMC5	structural maintenance of chromosomes 5	K1
805	VIT_213s0064g00270	14.815	19.5043	13.8754	11.908	46.5563	31.0314	14.8841	47.2179	38052248	VIT_213s0064g00270.1	VIT_213s0064g00270.1	PF01370	PTHR10366,PTHR10366:SF407	KOG1502	1.1.1.195		GO:0050662,GO:0003824	AT5G19440.1		NAD(P)-binding Rossmann-fold superfamily protein	K1
806	VIT_213s0064g00450	26.6197	38.5019	33.961	32.3131	27.214	32.5411	33.9431	38.6062	38052521	VIT_213s0064g00450.1	VIT_213s0064g00450.1	PF00173	PTHR19370,PTHR19370:SF68	KOG0536	1.6.2.2			AT5G09680.1	RLF	reduced lateral root formation	K1
807	VIT_213s0064g00560	0.300685	0.118654	0.17843	0.0615937	0.264571	0.212854	0.110895	0.387803	38051296	VIT_213s0064g00560.1	VIT_213s0064g00560.1	PF01751,PF02518,PF00204,PF16898,PF00521	PTHR10169,PTHR10169:SF38		5.99.1.3	K03164	GO:0006265,GO:0005524,GO:0003918,GO:0003677	AT3G23890.2	ATTOPII,TOPII	topoisomerase II	K1
808	VIT_213s0064g01050	335.231	342.657	242.758	243.537	482.68	338.072	415.615	551.093	38052987	VIT_213s0064g01050.1	VIT_213s0064g01050.1	PF00153	PTHR24089,PTHR24089:SF316	KOG0749		K05863		AT5G13490.2	AAC2	ADP/ATP carrier 2	K1
809	VIT_213s0064g01165	2.22472	0.520401	0.308354	0.39186	2.38765	1.34818	1.33195	2.814	38051949	VIT_213s0064g01165.1	VIT_213s0064g01165.1	PF02458	PTHR31625,PTHR31625:SF2		2.3.1.153		GO:0016747	AT3G29670.1		HXXXD-type acyl-transferase family protein	K1
810	VIT_213s0064g01250	0.850018	0	0.0273787	0	1.91659	0.517314	0.575004	1.34484	38052458	VIT_213s0064g01250.1	VIT_213s0064g01250.1		PTHR15107					AT3G52115.1	ATCOM1,ATGR1,COM1,GR1	gamma response gene 1	K1
811	VIT_213s0064g01870	1.63958	0.715532	1.01172	1.71954	1.6491	1.76269	1.76481	1.90855	38053249	VIT_213s0064g01870.1	VIT_213s0064g01870.1	PF13855,PF00931	PTHR23155,PTHR23155:SF414	KOG4658			GO:0005515,GO:0043531	AT3G14460.1		LRR and NB-ARC domains-containing disease resistance protein	K1
812	VIT_213s0067g00380	0.704368	0.891834	0.854784	0.132544	1.63472	1.66014	0.757589	1.59758	38066207	VIT_213s0067g00380.1	VIT_213s0067g00380.1	PF03936,PF01397	PTHR31225,PTHR31225:SF16		4.2.3.111		GO:0016829,GO:0010333,GO:0000287,GO:0008152	AT4G16740.2	ATTPS03,TPS03	terpene synthase 03	K1
813	VIT_213s0067g01020	1.67631	2.63769	1.35538	1.28787	58.5132	3.58349	1.41152	67.2356	38050938	VIT_213s0067g01020.1	VIT_213s0067g01020.1	PF03171,PF14226	PTHR10209,PTHR10209:SF134	KOG0143	1.14.11.19		GO:0055114,GO:0016491	AT5G05600.1		2-oxoglutarate (2OG) and Fe(II)-dependent oxygenase superfamily protein	K1
814	VIT_213s0067g01210	5.60278	5.68909	6.06828	5.99957	6.15788	5.15929	5.8017	6.65355	38051284	VIT_213s0067g01210.1	VIT_213s0067g01210.1	PF01851	PTHR12827			K03348	GO:0005680	AT5G05560.1	EMB2771	E3 ubiquitin ligase, putative	K1
815	VIT_213s0067g01650	13.2454	18.3364	15.356	7.57279	24.1125	11.8022	11.8411	37.6931	38053304	VIT_213s0067g01650.1	VIT_213s0067g01650.1	PF00462	PTHR10168,PTHR10168:SF68			K17479	GO:0045454,GO:0015035,GO:0009055	AT5G58530.1		Glutaredoxin family protein	K1
816	VIT_213s0067g01880	1.83914	0.902707	0.077927	0	11.7925	0.655008	1.36597	6.63621	38052751	VIT_213s0067g01880.1	VIT_213s0067g01880.1	PF03195	PTHR31301,PTHR31301:SF4					AT2G30130.1	ASL5,LBD12,PCK1	Lateral organ boundaries (LOB) domain family protein	K1
817	VIT_213s0067g01920	9.15699	8.03989	7.20824	8.16894	8.3615	7.12899	8.72096	11.3139	38066316	VIT_213s0067g01920.1	VIT_213s0067g01920.1	PF03810	PTHR12596,PTHR12596:SF2			K18460	GO:0008536,GO:0006886	AT5G06120.2		ARM repeat superfamily protein	K1
818	VIT_213s0067g02041	19.0142	21.7899	26.5089	24.6566	30.5347	19.7215	14.9884	38.3597	38052249	VIT_213s0067g02041.1	VIT_213s0067g02041.1	PF03208	PTHR19317,PTHR19317:SF9	KOG3142				AT2G38360.1	PRA1.B4	prenylated RAB acceptor 1.B4	K1
819	VIT_213s0067g02130	32.0705	25.3113	13.8567	20.4646	36.8147	19.1478	9.28115	45.2374	38051183	VIT_213s0067g02130.1	VIT_213s0067g02130.1		PTHR33790,PTHR33790:SF3					AT4G14270.1			K1
820	VIT_213s0067g02500	70.5791	78.8409	96.1063	58.6156	763.856	62.3488	80.716	590.995	38051119	VIT_213s0067g02500.1	VIT_213s0067g02500.1	PF00860	PTHR11119,PTHR11119:SF9			K06901	GO:0055085,GO:0016020,GO:0006810,GO:0005215,GO:0006863,GO:0005345	AT3G10960.1	ATAZG1,AZG1	AZA-guanine resistant1	K1
821	VIT_213s0067g03120	0.914247	1.28822	0.551651	1.11743	1.28925	0.985177	0.936925	1.4281	38066196	VIT_213s0067g03120.1	VIT_213s0067g03120.1	PF04998,PF04983,PF04997,PF00623	PTHR19376,PTHR19376:SF36		2.7.7.6	K16251	GO:0006351,GO:0003899,GO:0003677	AT2G40030.1	ATNRPD1B,DMS5,DRD3,NRPD1B,NRPE1	nuclear RNA polymerase D1B	K1
822	VIT_213s0067g03840	96.5326	101.392	82.9215	89.6701	102.769	84.9236	89.3883	132.899	38051118	VIT_213s0067g03840.1	VIT_213s0067g03840.1	PF10192	PTHR21229,PTHR21229:SF26				GO:0019236,GO:0007186,GO:0016021	AT5G18520.1		Lung seven transmembrane receptor family protein	K1
823	VIT_213s0073g00610	35.9627	31.3224	29.2483	38.581	40.8539	34.7317	35.0625	43.4382	38051105	VIT_213s0073g00610.1	VIT_213s0073g00610.1	PF00917,PF13423,PF14533,PF12436	PTHR24006,PTHR24006:SF445		3.4.19.12	K11838	GO:0005515	AT5G06600.2	UBP12	ubiquitin-specific protease 12	K1
824	VIT_213s0073g00710	2.20719	1.6961	2.72198	2.55212	2.42543	1.49602	1.73239	2.80596	38053364	VIT_213s0073g00710.1	VIT_213s0073g00710.1	PF06858,PF08155	PTHR11702,PTHR11702:SF4			K06943	GO:0005525	AT1G50920.1		Nucleolar GTP-binding protein	K1
825	VIT_213s0074g00300	17.8252	15.7685	13.8275	17.0241	17.0362	17.544	18.2442	23.0197	38051907	VIT_213s0074g00300.1	VIT_213s0074g00300.1	PF06602	PTHR10807,PTHR10807:SF8		3.1.3.95,3.1.3.64	K18081		AT3G10550.1		Myotubularin-like phosphatases II superfamily	K1
826	VIT_213s0074g00450	18.0778	23.5264	22.296	20.4839	31.7265	20.559	23.6367	36.5712	38051078	VIT_213s0074g00450.1	VIT_213s0074g00450.1	PF15629,PF15628	PTHR10359,PTHR10359:SF28		3.2.2.27			AT5G04560.2	DME	HhH-GPD base excision DNA repair family protein	K1
827	VIT_213s0084g00170	4.31696	4.39311	4.51435	5.96561	4.98006	4.10933	5.5252	5.9869	38051402	VIT_213s0084g00170.1	VIT_213s0084g00170.1	PF04565,PF04561,PF04563	PTHR20856,PTHR20856:SF8		2.7.7.6		GO:0006351,GO:0003899,GO:0003677,GO:0032549	AT5G45140.1	NRPC2	nuclear RNA polymerase C2	K1
828	VIT_213s0084g00810	4.21614	6.40057	5.75941	5.58279	22.0303	8.26244	5.47518	29.3801	38052400	VIT_213s0084g00810.1	VIT_213s0084g00810.1		PTHR23315,PTHR23315:SF57		6.3.2.19			AT1G08315.1		ARM repeat superfamily protein	K1
829	VIT_213s0101g00360	7.44641	8.37243	10.5681	10.1568	7.56692	6.97562	10.138	11.0392	38051113	VIT_213s0101g00360.1	VIT_213s0101g00360.1	PF09334	PTHR11946,PTHR11946:SF76		6.1.1.9	K01873	GO:0006418,GO:0005524,GO:0004812,GO:0000166	AT5G16715.1	EMB2247	ATP binding;valine-tRNA ligases;aminoacyl-tRNA ligases;nucleotide binding;ATP binding;aminoacyl-tRNA ligases	K1
830	VIT_213s0106g00490	18.4329	20.9713	19.3839	20.414	14.6301	16.7675	16.4232	20.777	38052695	VIT_213s0106g00490.1	VIT_213s0106g00490.1	PF05496,PF04212,PF09336	PTHR23074,PTHR23074:SF93		3.6.4.6	K12196	GO:0009378,GO:0006310,GO:0006281	AT2G27600.1	ATSKD1,SKD1,VPS4	AAA-type ATPase family protein	K1
831	VIT_213s0139g00150	20.257	18.2141	13.2544	13.5354	34.2548	18.8035	20.4759	40.6892	38051597	VIT_213s0139g00150.1	VIT_213s0139g00150.1	PF03145	PTHR10315,PTHR10315:SF29	KOG3002	6.3.2.19	K04506	GO:0007275,GO:0006511,GO:0005634	AT3G61790.1		Protein with RING/U-box and TRAF-like domains	K1
832	VIT_213s0147g00120	7.53693	8.81501	5.02728	6.94091	44.3009	8.5525	6.96443	27.5149	38053206	VIT_213s0147g00120.1	VIT_213s0147g00120.1	PF07725	PTHR11017,PTHR11017:SF169	KOG0472				AT1G69550.1		disease resistance protein (TIR-NBS-LRR class)	K1
833	VIT_213s0147g00130	3.15789	0.352381	1.14919	0	15.6333	4.16062	0.841823	11.343	38051273	VIT_213s0147g00130.1	VIT_213s0147g00130.1	PF00450	PTHR11802,PTHR11802:SF29				GO:0006508,GO:0004185	AT3G12203.1	scpl17	serine carboxypeptidase-like 17	K1
834	VIT_213s0147g00150	25.7872	24.8865	14.3112	24.6427	119.727	25.8723	22.3515	79.3038	38052881	VIT_213s0147g00150.1	VIT_213s0147g00150.1		PTHR34630,PTHR34630:SF1					AT5G45250.1	RPS4	Disease resistance protein (TIR-NBS-LRR class) family	K1
835	VIT_213s0147g00160	0.768069	1.56911	1.73718	0.772311	6.40358	2.84165	1.37067	9.9179	38052237	VIT_213s0147g00160.1	VIT_213s0147g00160.1	PF11744	PTHR31086,PTHR31086:SF8				GO:0015743	AT3G11680.1		Aluminium activated malate transporter family protein	K1
836	VIT_213s0156g00220	39.3929	50.8908	59.1836	56.2269	58.7944	38.6257	33.8334	73.7784	38051220	VIT_213s0156g00220.1	VIT_213s0156g00220.1		PTHR34484,PTHR34484:SF2					AT5G19900.1		PRLI-interacting factor, putative	K1
837	VIT_213s0158g00080	3.88619	5.37863	5.80815	3.59307	6.24615	3.78322	4.13596	7.52134	38052709	VIT_213s0158g00080.1	VIT_213s0158g00080.1	PF00450	PTHR11802,PTHR11802:SF66		3.4.16.6		GO:0006508,GO:0004185	AT3G63470.1	scpl40	serine carboxypeptidase-like 40	K1
838	VIT_213s0158g00340	43.3163	17.7208	3.40908	5.55523	405.039	62.492	56.0945	312.966	38053084	VIT_213s0158g00340.1	VIT_213s0158g00340.1	PF01210,PF07479	PTHR11728,PTHR11728:SF17	KOG2711	1.1.1.8	K00006	GO:0055114,GO:0051287,GO:0046168,GO:0016616,GO:0005975,GO:0004367,GO:0009331,GO:0006072	AT2G41540.1	GPDHC1	6-phosphogluconate dehydrogenase family protein	K1
839	VIT_213s0175g00120	27.6657	23.639	24.7773	33.0725	26.1751	25.1026	27.8016	31.1542	38053286	VIT_213s0175g00120.1	VIT_213s0175g00120.1	PF00170	PTHR22952,PTHR22952:SF137			K14432	GO:0043565,GO:0006355,GO:0003700	AT3G56850.1	AREB3,DPBF3	ABA-responsive element binding protein 3	K1
840	VIT_213s0175g00150	16.9247	24.4323	13.0604	11.3617	27.1083	23.3166	20.9223	34.5142	38051012	VIT_213s0175g00150.1	VIT_213s0175g00150.1		PTHR23315,PTHR23315:SF133			K08332		AT1G76390.2		ARM repeat superfamily protein	K1
841	VIT_214s0006g00380	18.6884	19.6355	16.7803	17.1571	15.9191	14.2227	17.5354	20.003	38020000	VIT_214s0006g00380.1	VIT_214s0006g00380.1	PF04389	PTHR21092,PTHR21092:SF0	KOG2657		K06171	GO:0016485,GO:0016021	AT3G52640.1		Zn-dependent exopeptidases superfamily protein	K1
842	VIT_214s0006g00920	5.14423	1.52937	1.01663	0.515985	8.42995	7.41358	11.5876	14.3253	38022823	VIT_214s0006g00920.1	VIT_214s0006g00920.1	PF04576	PTHR31448					AT1G70750.1		Protein of unknown function, DUF593	K1
843	VIT_214s0006g02260	1.90874	2.52463	2.48947	2.0276	2.77909	2.45652	3.07247	2.88108	38020487	VIT_214s0006g02260.1	VIT_214s0006g02260.1	PF01554	PTHR11206,PTHR11206:SF167	KOG1347		K03327	GO:0055085,GO:0016020,GO:0015297,GO:0015238,GO:0006855	AT1G15150.1		MATE efflux family protein	K1
844	VIT_214s0006g02490	8.79348	3.80445	6.44103	7.3527	8.25479	5.65788	6.54981	11.8461	38022346	VIT_214s0006g02490.1	VIT_214s0006g02490.1	PF00564	PTHR31066,PTHR31066:SF3				GO:0005515	AT2G01190.1		Octicosapeptide/Phox/Bem1p family protein	K1
845	VIT_214s0006g02670	8.54778	4.0627	5.1697	9.58868	10.8314	5.95409	6.38564	12.2715	38020536	VIT_214s0006g02670.1	VIT_214s0006g02670.1	PF01985	PTHR31846,PTHR31846:SF10	KOG1990			GO:0003723	AT5G16180.1	ATCRS1,CRS1	ortholog of maize chloroplast splicing factor CRS1	K1
846	VIT_214s0006g03120	6.96721	8.89147	9.41901	9.33291	9.56918	6.94018	8.98285	10.0946	38021704	VIT_214s0006g03120.1	VIT_214s0006g03120.1		PTHR21663					AT1G67140.3	SWEETIE	HEAT repeat-containing protein	K1
847	VIT_214s0006g03180	0.178974	0.390838	0.987326	0.677717	2.24698	0.677733	2.47714	4.55809	38021912	VIT_214s0006g03180.1	VIT_214s0006g03180.1	PF00135	PTHR23024,PTHR23024:SF93	KOG1515	3.1.1.1			AT5G16080.1	AtCXE17,CXE17	carboxyesterase 17	K1
848	VIT_214s0030g01840	7.53331	5.0799	4.01449	5.05383	7.08797	5.44222	5.56424	8.30808	38021739	VIT_214s0030g01840.1	VIT_214s0030g01840.1	PF01142	PTHR13326,PTHR13326:SF8		5.4.99.27	K06176	GO:0009982,GO:0009451,GO:0003723,GO:0001522	AT3G04820.1		Pseudouridine synthase family protein	K1
849	VIT_214s0030g02020	39.4305	41.1702	27.7866	25.7782	61.9821	51.8775	33.751	61.5003	38022801	VIT_214s0030g02020.1	VIT_214s0030g02020.1	PF00248	PTHR11732,PTHR11732:SF216	KOG1575	1.1.1.317			AT1G60690.1		NAD(P)-linked oxidoreductase superfamily protein	K1
850	VIT_214s0030g02190	11.2064	10.1821	11.4447	11.3897	13.5855	9.69481	12.6573	14.7485	38022363	VIT_214s0030g02190.1	VIT_214s0030g02190.1	PF01434,PF00004	PTHR23076,PTHR23076:SF58	KOG0731			GO:0006508,GO:0005524,GO:0004222	AT3G04340.1	emb2458	FtsH extracellular protease family	K1
851	VIT_214s0036g00420	11.4071	23.0276	14.0159	9.31528	56.5401	17.1145	8.33474	77.1561	38022675	VIT_214s0036g00420.1	VIT_214s0036g00420.1	PF14531	PTHR24349,PTHR24349:SF76	KOG0032	2.7.11.1			AT1G08650.1	ATPPCK1,PPCK1	phosphoenolpyruvate carboxylase kinase 1	K1
852	VIT_214s0036g00750	14.0804	17.6149	17.4969	16.217	12.9656	14.5067	16.4933	17.7981	38020194	VIT_214s0036g00750.1	VIT_214s0036g00750.1	PF13499	PTHR14095,PTHR14095:SF6	KOG0044				AT5G28850.2		Calcium-binding EF-hand family protein	K1
853	VIT_214s0036g00850	5.60343	7.02177	5.86573	5.42794	6.14043	4.85939	5.36651	6.83365	38020588	VIT_214s0036g00850.1	VIT_214s0036g00850.1	PF07727,PF01042,PF01902	PTHR12196	KOG2317	6.3.1.14	K06927		AT3G04480.1		endoribonucleases	K1
854	VIT_214s0036g00990	107.492	149.635	160.192	99.0397	411.657	100.705	73.8686	386.412	38020692	VIT_214s0036g00990.1	VIT_214s0036g00990.1	PF11976	PTHR10666,PTHR10666:SF150	KOG0005,KOG0001		K08770		AT4G05320.2	UBQ10	polyubiquitin 10	K1
855	VIT_214s0036g01460	13.9805	14.5792	16.1586	19.0671	15.4869	14.3603	18.1739	22.317	38021268	VIT_214s0036g01460.1	VIT_214s0036g01460.1	PF04851,PF00271	PTHR10799,PTHR10799:SF350		3.6.4.12	K10779	GO:0016787,GO:0005524,GO:0003677	AT1G08600.4	ATRX,CHR20	P-loop containing nucleoside triphosphate hydrolases superfamily protein	K1
856	VIT_214s0036g01520	14.6923	9.7322	10.7714	13.9459	15.2605	15.0585	14.0172	16.3312	38019367	VIT_214s0036g01520.1	VIT_214s0036g01520.1	PF04427	PTHR22734,PTHR22734:SF3	KOG2780		K14846		AT4G01560.1	MEE49	Ribosomal RNA processing Brix domain protein	K1
857	VIT_214s0060g00620	0.71065	0.618524	0.302667	0.668847	1.50007	1.29645	1.25427	1.69086	38021891	VIT_214s0060g00620.1	VIT_214s0060g00620.1	PF12708	PTHR31375,PTHR31375:SF13		3.2.1.15			AT1G02460.1		Pectin lyase-like superfamily protein	K1
858	VIT_214s0060g00760	7.8867	0.69244	0.0863353	0.77033	10.3129	3.75786	0.77599	16.6325	38019918	VIT_214s0060g00760.1	VIT_214s0060g00760.1	PF01501	PTHR11183,PTHR11183:SF33	KOG1950	2.4.1.123	K18819	GO:0016757,GO:0047216,GO:0006012	AT2G47180.1	AtGolS1,GolS1	galactinol synthase 1	K1
859	VIT_214s0060g00790	17.4313	1.04512	0.402437	0.734253	29.193	12.1404	2.86377	25.2057	38021285	VIT_214s0060g00790.1	VIT_214s0060g00790.1	PF01501	PTHR11183,PTHR11183:SF33	KOG1950	2.4.1.123	K18819	GO:0016757,GO:0047216,GO:0006012	AT1G56600.1	AtGolS2,GolS2	galactinol synthase 2	K1
860	VIT_214s0060g00810	92.0191	20.2568	11.7477	27.2297	126.201	86.8822	36.5684	231.138	38021217	VIT_214s0060g00810.1	VIT_214s0060g00810.1	PF01501	PTHR11183,PTHR11183:SF33	KOG1950	2.4.1.123	K18819	GO:0016757,GO:0047216,GO:0006012	AT2G47180.1	AtGolS1,GolS1	galactinol synthase 1	K1
861	VIT_214s0060g01540	14.395	15.6076	13.9485	11.9046	15.6418	13.5334	14.1179	19.6671	38019341	VIT_214s0060g01540.1	VIT_214s0060g01540.1	PF05739	PTHR19957,PTHR19957:SF108	KOG0809			GO:0005515	AT3G05710.2	ATSYP43,SYP43	syntaxin of plants 43	K1
862	VIT_214s0060g01560	36.2773	31.5747	31.25	33.6331	68.2457	34.3751	33.8444	89.7956	38019660	VIT_214s0060g01560.1	VIT_214s0060g01560.1	PF13639,PF00628	PTHR10615	KOG0320			GO:0008270,GO:0005515	AT3G05670.1		RING/U-box protein	K1
863	VIT_214s0060g01750	16.8878	19.5476	16.5543	19.0393	14.5088	15.5028	15.4452	22.593	38022508	VIT_214s0060g01750.1	VIT_214s0060g01750.1	PF16891,PF00149	PTHR11668,PTHR11668:SF262	KOG0374	3.1.3.16	K06269	GO:0016787	AT5G27840.1	TOPP8	Calcineurin-like metallo-phosphoesterase superfamily protein	K1
864	VIT_214s0060g02100	3.1202	1.2919	1.28674	1.70109	4.36679	1.46159	1.50962	3.80545	38020759	VIT_214s0060g02100.1	VIT_214s0060g02100.1	PF13041,PF01535	PTHR24015					AT5G66520.1		Tetratricopeptide repeat (TPR)-like superfamily protein	K1
865	VIT_214s0060g02140	728.778	434.637	256.894	290.572	5316.68	803.747	641.338	2044.65	38022584	VIT_214s0060g02140.1	VIT_214s0060g02140.1	PF05755	PTHR33732,PTHR33732:SF3					AT3G05500.1		Rubber elongation factor protein (REF)	K1
866	VIT_214s0060g02320	7.18903	15.4045	1.3904	0.571874	42.589	5.25225	4.06778	56.8066	38020736	VIT_214s0060g02320.1	VIT_214s0060g02320.1	PF01794,PF08022,PF08414,PF08030	PTHR11972,PTHR11972:SF57		1.6.3.1	K13447	GO:0055114,GO:0016491,GO:0050664,GO:0004601,GO:0016174	AT5G47910.1	ATRBOHD,RBOHD	respiratory burst oxidase homologue D	K1
867	VIT_214s0060g02440	3.05095	0.529097	2.20305	3.54849	2.57123	1.33391	0.984286	3.04469	38022339	VIT_214s0060g02440.1	VIT_214s0060g02440.1	PF12171	PTHR10593,PTHR10593:SF31					AT3G50700.1	AtIDD2,IDD2	indeterminate(ID)-domain 2	K1
868	VIT_214s0066g00170	9.14699	3.7594	6.39244	6.10046	18.6037	9.19399	5.35525	13.8087	38021689	VIT_214s0066g00170.1	VIT_214s0066g00170.1	PF00067	PTHR24286,PTHR24286:SF29	KOG0157		K12639	GO:0055114,GO:0020037,GO:0016705,GO:0005506	AT5G14400.1	CYP724A1	cytochrome P450, family 724, subfamily A, polypeptide 1	K1
869	VIT_214s0066g00450	107.108	85.9162	95.2906	98.7366	116.14	116.036	119.034	174.638	38021634	VIT_214s0066g00450.1	VIT_214s0066g00450.1	PF06999	PTHR31902,PTHR31902:SF5					AT5G40510.1		Sucrase/ferredoxin-like family protein	K1
870	VIT_214s0066g00730	2.7076	1.87437	2.15307	2.48531	2.67804	2.63858	3.0354	3.81397	38021022	VIT_214s0066g00730.1	VIT_214s0066g00730.1	PF12530	PTHR16212,PTHR16212:SF4					AT3G27670.1	RST1	ARM repeat superfamily protein	K1
871	VIT_214s0066g00800	31.7474	26.6583	31.5397	32.6706	30.1588	25.1929	27.9841	39.1613	38019694	VIT_214s0066g00800.1	VIT_214s0066g00800.1	PF07223	PTHR31805,PTHR31805:SF2					AT3G01560.1		Protein of unknown function (DUF1421)	K1
872	VIT_214s0066g01020	97.5017	119.212	100.155	95.3604	154.187	99.5644	95.0879	201.188	38022285	VIT_214s0066g01020.1	VIT_214s0066g01020.1	PF00397,PF00271,PF00270	PTHR24031,PTHR24031:SF274		3.6.4.13	K12823	GO:0005515,GO:0005524,GO:0003676	AT5G14610.2		DEAD box RNA helicase family protein	K1
873	VIT_214s0066g01190	55.7831	38.2557	28.3406	19.2933	129.062	70.2346	68.2605	143.959	38022655	VIT_214s0066g01190.1	VIT_214s0066g01190.1	PF07816	PTHR33095,PTHR33095:SF4					AT1G70420.1		Protein of unknown function (DUF1645)	K1
874	VIT_214s0066g01450	8.21423	9.19239	8.65112	9.44019	9.09401	9.30836	11.7304	10.5303	38022505	VIT_214s0066g01450.1	VIT_214s0066g01450.1	PF15612,PF00439,PF01429,PF00628	PTHR14140,PTHR14140:SF29		2.3.1.48		GO:0005515,GO:0005634,GO:0003677	AT3G01460.1	ATMBD9,MBD9	methyl-CPG-binding domain 9	K1
875	VIT_214s0066g02060	139.038	199.258	60.0457	43.3923	508.634	206.99	197.244	628.482	38021301	VIT_214s0066g02060.1	VIT_214s0066g02060.1	PF00004,PF14363	PTHR23070,PTHR23070:SF5				GO:0005524	AT5G40010.1	AATP1	AAA-ATPase 1	K1
876	VIT_214s0066g02080	99.9889	164.065	62.6413	55.5196	205.143	150.653	186.115	239.711	38021977	VIT_214s0066g02080.1	VIT_214s0066g02080.1	PF14363	PTHR23070,PTHR23070:SF5					AT5G40010.1	AATP1	AAA-ATPase 1	K1
877	VIT_214s0066g02090	3.79317	8.00612	2.40397	2.48359	12.0911	6.01261	5.38459	12.8215	38019532	VIT_214s0066g02090.1	VIT_214s0066g02090.1	PF00004,PF14363	PTHR23070,PTHR23070:SF5				GO:0005524	AT5G40010.1	AATP1	AAA-ATPase 1	K1
878	VIT_214s0066g02100	4.84568	10.1367	2.05667	0.813125	22.3602	7.68756	6.45102	34.1185	38021356	VIT_214s0066g02100.1	VIT_214s0066g02100.1	PF00004,PF14363	PTHR23070,PTHR23070:SF5				GO:0005524	AT5G40010.1	AATP1	AAA-ATPase 1	K1
879	VIT_214s0066g02190	266.043	99.4642	21.496	8.4519	484.48	374.777	309.932	546.078	38020699	VIT_214s0066g02190.1	VIT_214s0066g02190.1	PF07059	PTHR31558,PTHR31558:SF3					AT1G59650.1	CW14	Protein of unknown function (DUF1336)	K1
880	VIT_214s0066g02380	79.3678	93.0865	81.6886	73.4426	96.4164	70.6186	68.8568	103.405	38020527	VIT_214s0066g02380.1	VIT_214s0066g02380.1	PF00400	PTHR11024	KOG1332		K14004	GO:0005515	AT2G30050.1		transducin family protein / WD-40 repeat family protein	K1
881	VIT_214s0066g02470	4.58344	2.78178	0.495787	0.570379	6.76526	4.76192	4.18942	7.40123	38020041	VIT_214s0066g02470.1	VIT_214s0066g02470.1	PF04601	PTHR31205,PTHR31205:SF6					AT1G27100.1		Actin cross-linking protein	K1
882	VIT_214s0068g00300	2.01552	1.6873	0.512013	1.71499	6.43815	1.93048	1.01772	9.39223	38020488	VIT_214s0068g00300.1	VIT_214s0068g00300.1	PF16135,PF07897,PF16136	PTHR31413,PTHR31413:SF4				GO:0007165	AT3G29575.4	AFP3	ABI five binding protein 3	K1
883	VIT_214s0068g00630	13.6377	11.6237	11.3852	12.8783	12.6727	9.37468	12.139	13.9931	38022109	VIT_214s0068g00630.1	VIT_214s0068g00630.1	PF08389	PTHR12363,PTHR12363:SF27	KOG2081		K15436		AT1G12930.1		ARM repeat superfamily protein	K1
884	VIT_214s0068g00880	26.0023	19.2272	13.9747	25.2142	28.1374	25.4698	19.0207	30.3821	38019687	VIT_214s0068g00880.1	VIT_214s0068g00880.1	PF01667	PTHR11594	KOG1779		K02978	GO:0006412,GO:0005840,GO:0005622,GO:0003735	AT3G61110.1	ARS27A,RS27A	ribosomal protein S27	K1
885	VIT_214s0068g00980	1.48327	3.57788	5.30879	3.76197	7.59236	1.19264	2.77803	5.44241	38022449	VIT_214s0068g00980.1	VIT_214s0068g00980.1	PF12576	PTHR33645,PTHR33645:SF3					AT3G19340.1		Protein of unknown function (DUF3754)	K1
886	VIT_214s0068g01070	12.3734	11.8731	13.3926	14.2956	12.8884	12.0524	13.5779	16.5837	38020320	VIT_214s0068g01070.1	VIT_214s0068g01070.1	PF00856,PF05033,PF02182	PTHR22884,PTHR22884:SF352	KOG1082	2.1.1.43	K11420	GO:0005515,GO:0034968,GO:0018024,GO:0008270,GO:0005634,GO:0042393	AT5G13960.1	KYP,SDG33,SUVH4	SU(VAR)3-9 homolog 4	K1
887	VIT_214s0068g01190	17.168	15.3442	8.9144	9.43633	111.898	13.9593	8.81253	72.5942	38020917	VIT_214s0068g01190.1	VIT_214s0068g01190.1	PF00696	PTHR21499,PTHR21499:SF34		2.7.2.4	K00928		AT3G02020.1	AK3	aspartate kinase 3	K1
888	VIT_214s0068g01290	0.260192	0	0.187319	0	2.76023	1.23953	1.22212	2.69072	38021428	VIT_214s0068g01290.1	VIT_214s0068g01290.1	PF02362	PTHR31140,PTHR31140:SF10				GO:0003677	AT3G26790.1	FUS3	AP2/B3-like transcriptional factor family protein	K1
889	VIT_214s0068g01350	0.667118	0.0210143	0	0.0240027	0.819541	0.429517	0.618636	0.740671	38021836	VIT_214s0068g01350.1	VIT_214s0068g01350.1	PF07707,PF00651	PTHR24412,PTHR24412:SF214				GO:0005515	AT3G61600.1	ATPOB1,POB1	POZ/BTB containin G-protein 1	K1
890	VIT_214s0068g01360	8.5406	16.8048	14.9329	12.3248	23.2124	18.3805	15.2104	28.6548	38022030	VIT_214s0068g01360.1	VIT_214s0068g01360.1	PF02893	PTHR31969,PTHR31969:SF7					AT5G13200.1		GRAM domain family protein	K1
891	VIT_214s0068g01470	15.6658	19.2632	16.0742	15.6599	63.4216	24.9	21.746	97.9781	38022375	VIT_214s0068g01470.1	VIT_214s0068g01470.1	PF03114	PTHR34119,PTHR34119:SF1				GO:0005737,GO:0005515	AT2G33490.1		hydroxyproline-rich glycoprotein family protein	K1
892	VIT_214s0068g01490	207.766	199.22	33.3945	11.6243	1459.77	312.078	243.766	1354.31	38019469	VIT_214s0068g01490.1	VIT_214s0068g01490.1	PF02365	PTHR31989,PTHR31989:SF20				GO:0006355,GO:0003677	AT2G33480.2	ANAC041,NAC041	NAC domain containing protein 41	K1
893	VIT_214s0068g01760	13.0365	20.2172	17.8226	11.2539	29.417	17.6172	10.9929	40.3462	38019622	VIT_214s0068g01760.1	VIT_214s0068g01760.1	PF00106	PTHR24322,PTHR24322:SF378	KOG0725			GO:0016491,GO:0008152	AT3G01980.4		NAD(P)-binding Rossmann-fold superfamily protein	K1
894	VIT_214s0068g01890	1.02676	0.464495	0.857026	0.777323	1.04035	1.07396	0.141123	1.34517	38019526	VIT_214s0068g01890.1	VIT_214s0068g01890.1	PF06813	PTHR21576,PTHR21576:SF44					AT5G14120.1		Major facilitator superfamily protein	K1
895	VIT_214s0068g02040	215.206	109.796	96.7337	109.743	703.41	169.714	159.724	738.25	38020169	VIT_214s0068g02040.1	VIT_214s0068g02040.1	PF10539	PTHR10857,PTHR10857:SF43					AT3G27090.1		DCD (Development and Cell Death) domain protein	K1
896	VIT_214s0081g00150	17.8319	14.0444	10.9087	14.7545	16.974	15.9541	16.6316	18.3195	38022550	VIT_214s0081g00150.1	VIT_214s0081g00150.1	PF00515,PF13414,PF12796	PTHR22904,PTHR22904:SF383	KOG4412			GO:0005515	AT3G04710.3		ankyrin repeat family protein	K1
897	VIT_214s0081g00320	4.53956	7.21368	6.12436	6.36482	9.46654	5.26128	4.03907	10.7222	38021584	VIT_214s0081g00320.1	VIT_214s0081g00320.1	PF04576	PTHR31448,PTHR31448:SF10					AT1G08800.1		Protein of unknown function, DUF593	K1
898	VIT_214s0081g00490	24.378	26.7811	23.9734	25.613	20.7938	16.6767	22.7316	26.3963	38022166	VIT_214s0081g00490.1	VIT_214s0081g00490.1	PF13450	PTHR16128,PTHR16128:SF8		1.3.3.4			AT3G04650.1		FAD/NAD(P)-binding oxidoreductase family protein	K1
899	VIT_214s0081g00730	2.69975	4.86262	1.77403	1.59314	18.6602	6.89048	9.28699	29.354	38021539	VIT_214s0081g00730.1	VIT_214s0081g00730.1	PF00847	PTHR31190,PTHR31190:SF3			K14516	GO:0006355,GO:0003700	AT3G23240.1	ATERF1,ERF1	ethylene response factor 1	K1
900	VIT_214s0083g00080	3.12499	0.256686	1.09988	0.868793	3.24796	1.26069	1.01557	4.13157	38022742	VIT_214s0083g00080.1	VIT_214s0083g00080.1		PTHR36748					AT5G16030.1			K1
901	VIT_214s0083g00110	411.101	83.902	45.3051	49.0686	5066.73	477.408	138.759	1512.9	38019952	VIT_214s0083g00110.1	VIT_214s0083g00110.1	PF06351	PTHR31843,PTHR31843:SF2		5.3.99.6	K10525	GO:0016853,GO:0009507	AT3G25780.1	AOC3	allene oxide cyclase 3	K1
902	VIT_214s0083g00710	13.1487	10.3718	13.2505	11.1636	14.9351	11.3709	9.17396	16.3529	38019777	VIT_214s0083g00710.1	VIT_214s0083g00710.1	PF13639	PTHR22763,PTHR22763:SF8		6.3.2.19		GO:0008270,GO:0005515	AT3G02340.1		RING/U-box superfamily protein	K1
903	VIT_214s0083g00750	9.98504	11.0983	11.4063	13.1317	11.1028	10.3773	13.3243	14.4994	38020496	VIT_214s0083g00750.1	VIT_214s0083g00750.1	PF14225,PF14222,PF14228	PTHR12295					AT5G15680.1		ARM repeat superfamily protein	K1
904	VIT_214s0083g00960	16.925	15.375	17.8137	20.8098	20.2344	20.3661	23.678	25.6639	38020622	VIT_214s0083g00960.1	VIT_214s0083g00960.1	PF00569,PF13764	PTHR21725,PTHR21725:SF1		2.3.1.48		GO:0008270	AT3G02260.1	ASA1,BIG,CRM1,DOC1,LPR1,TIR3,UMB1	auxin transport protein (BIG)	K1
905	VIT_214s0083g00980	0.62558	0.212897	0.143876	0.032754	0.442853	0.301104	0.535559	0.500083	38019331	VIT_214s0083g00980.1	VIT_214s0083g00980.1	PF01190	PTHR31614,PTHR31614:SF9					AT5G15780.1		Pollen Ole e 1 allergen and extensin family protein	K1
906	VIT_214s0083g01170	10.8933	21.51	12.4805	8.31332	53.6119	9.0024	8.95056	72.5631	38021212	VIT_214s0083g01170.1	VIT_214s0083g01170.1	PF00153	PTHR24089,PTHR24089:SF391	KOG0765				AT5G15640.1		Mitochondrial substrate carrier family protein	K1
907	VIT_214s0108g00030	0.243523	0	0.145794	0	0.366641	0.075132	0.200293	0.607871	38021737	VIT_214s0108g00030.1	VIT_214s0108g00030.1	PF00544,PF04431	PTHR31683,PTHR31683:SF14		4.2.2.2	K01728	GO:0030570	AT5G15110.1		Pectate lyase family protein	K1
908	VIT_214s0108g00450	3.2887	0.842071	1.02493	0.805195	9.0101	2.59364	2.09327	7.50251	38019317	VIT_214s0108g00450.1	VIT_214s0108g00450.1							AT5G15190.2			K1
909	VIT_214s0108g00630	5.40187	1.80618	0.726168	0.432313	34.0633	10.034	6.07578	25.8251	38020815	VIT_214s0108g00630.1	VIT_214s0108g00630.1	PF01490	PTHR22950,PTHR22950:SF280	KOG1303		K15015		AT3G28960.1		Transmembrane amino acid transporter family protein	K1
910	VIT_214s0108g00690	2.01145	0.587652	0	0.102187	11.857	3.55532	1.588	8.57314	38021519	VIT_214s0108g00690.1	VIT_214s0108g00690.1	PF01490	PTHR22950,PTHR22950:SF280	KOG1303		K15015		AT3G28960.1		Transmembrane amino acid transporter family protein	K1
911	VIT_214s0108g01030	19.6128	22.3808	19.8344	21.9855	20.3461	18.352	20.0082	22.9701	38020732	VIT_214s0108g01030.1	VIT_214s0108g01030.1	PF13893,PF00076	PTHR24012,PTHR24012:SF386	KOG1190			GO:0003676	AT3G01150.1	ATPTB1,PTB,PTB1	polypyrimidine tract-binding protein 1	K1
912	VIT_214s0108g01170	19.7778	13.8077	22.3158	17.8421	16.4151	22.4529	16.7161	23.4688	38020183	VIT_214s0108g01170.1	VIT_214s0108g01170.1	PF01095	PTHR31321,PTHR31321:SF12		3.1.1.11	K01051	GO:0042545,GO:0030599,GO:0005618	AT3G29090.1	ATPME31,PME31	pectin methylesterase 31	K1
913	VIT_214s0108g01185	1.61786	1.6583	1.46157	1.59331	1.63457	1.23354	1.19169	2.16011	38021850	VIT_214s0108g01185.1	VIT_214s0108g01185.1	PF14432,PF01535,PF13041	PTHR24015,PTHR24015:SF640					AT5G15340.1		Pentatricopeptide repeat (PPR) superfamily protein	K1
914	VIT_214s0108g01450	11.2421	3.77922	1.44755	1.53874	13.397	10.3262	12.0896	20.1818	38020294	VIT_214s0108g01450.1	VIT_214s0108g01450.1	PF07839	PTHR33349,PTHR33349:SF1				GO:0005516	AT5G39380.1		Plant calmodulin-binding protein-related	K1
915	VIT_214s0108g01680	20.7459	21.1201	22.6497	26.8396	25.2672	21.6736	25.6471	30.0632	38020008	VIT_214s0108g01680.1	VIT_214s0108g01680.1	PF00628,PF12765,PF12830	PTHR21704			K06672	GO:0005515	AT5G15540.1	ATSCC2,EMB2773,SCC2	PHD finger family protein	K1
916	VIT_214s0128g00270	0.267153	0.0845777	1.62675	0.763673	1.55771	0.333237	1.00328	1.95024	38021997	VIT_214s0128g00270.1	VIT_214s0128g00270.1		PTHR34661,PTHR34661:SF3	KOG0710				AT1G54850.1		HSP20-like chaperones superfamily protein	K1
917	VIT_214s0128g00280	0.72313	0.281059	1.48463	0.534251	1.26222	0.244136	1.13636	1.39594	38021349	VIT_214s0128g00280.1	VIT_214s0128g00280.1	PF00011	PTHR34661,PTHR34661:SF3					AT1G54850.1		HSP20-like chaperones superfamily protein	K1
918	VIT_214s0128g00380	35.6148	31.9197	22.8933	26.3055	29.3446	27.8206	24.366	36.958	38022599	VIT_214s0128g00380.1	VIT_214s0128g00380.1	PF04893	PTHR12822	KOG3114			GO:0016020	AT5G27490.1		Integral membrane Yip1 family protein	K1
919	VIT_214s0128g00390	8.64461	9.44331	9.76802	6.27719	136.697	9.37223	5.12706	123.919	38022076	VIT_214s0128g00390.1	VIT_214s0128g00390.1	PF00153	PTHR24089,PTHR24089:SF282	KOG0769				AT3G05290.1	PNC1	peroxisomal adenine nucleotide carrier 1	K1
920	VIT_214s0128g00720	8.84034	9.56274	12.3583	10.0078	9.01761	9.20654	10.0346	11.413	38022864	VIT_214s0128g00720.1	VIT_214s0128g00720.1	PF00501	PTHR24096,PTHR24096:SF221		6.2.1.3		GO:0008152,GO:0003824	AT5G27600.1	ATLACS7,LACS7	long-chain acyl-CoA synthetase 7	K1
921	VIT_214s0128g00820	4.08563	1.30831	2.88254	1.86651	3.4372	3.09638	3.89105	3.57821	38020979	VIT_214s0128g00820.1	VIT_214s0128g00820.1				2.7.7.7			AT1G67500.2	ATREV3,REV3	recovery protein 3	K1
922	VIT_214s0128g00840	7.46869	6.78038	7.8507	6.89992	6.31412	6.7794	6.9145	7.81286	38019926	VIT_214s0128g00840.1	VIT_214s0128g00840.1	PF03104,PF14260,PF00136	PTHR10322,PTHR10322:SF5	KOG0969	2.7.7.7		GO:0008408,GO:0003677,GO:0000166,GO:0019985,GO:0016035,GO:0006281	AT1G67500.2	ATREV3,REV3	recovery protein 3	K1
923	VIT_214s0171g00140	2.21961	0.744735	0.422316	0.921295	1.70773	1.30861	1.41229	2.62479	38022297	VIT_214s0171g00140.1	VIT_214s0171g00140.1	PF01476,PF00069	PTHR27001,PTHR27001:SF120	KOG1187	2.7.11.1		GO:0006468,GO:0005524,GO:0004672	AT3G01840.1		Protein kinase superfamily protein	K1
924	VIT_214s0171g00380	67.5491	53.2919	46.3447	60.4973	179.363	65.7026	64.9389	160.586	38019749	VIT_214s0171g00380.1	VIT_214s0171g00380.1	PF17035,PF00439	PTHR22880,PTHR22880:SF158	KOG1474			GO:0005515	AT3G27260.1	GTE8	global transcription factor group E8	K1
925	VIT_214s0171g00440	0.845655	0.113174	0	0	1.8078	0.466663	0.642901	1.75163	38021335	VIT_214s0171g00440.1	VIT_214s0171g00440.1	PF00044,PF02800	PTHR10836,PTHR10836:SF44	KOG0657	1.2.1.12	K00134	GO:0055114,GO:0016620	AT1G13440.1	GAPC-2,GAPC2	glyceraldehyde-3-phosphate dehydrogenase C2	K1
926	VIT_214s0171g00490	37.8532	42.5414	41.939	41.7227	52.7811	42.4464	26.422	76.4875	38022355	VIT_214s0171g00490.1	VIT_214s0171g00490.1	PF00479,PF02781	PTHR23429,PTHR23429:SF6		1.1.1.49	K00036	GO:0055114,GO:0050661,GO:0006006,GO:0004345	AT5G40760.1	G6PD6	glucose-6-phosphate dehydrogenase 6	K1
927	VIT_214s0219g00090	1.22616	0.047302	0.364306	0.0598167	0.988448	0.709896	1.13212	1.32396	38019899	VIT_214s0219g00090.1	VIT_214s0219g00090.1	PF06886	PTHR31358,PTHR31358:SF12					AT3G01710.2		TPX2 (targeting protein for Xklp2) protein family	K1
928	VIT_215s0021g00480	53.1381	78.9006	58.1753	57.8728	84.0972	59.2325	62.5805	120.055	38040464	VIT_215s0021g00480.1	VIT_215s0021g00480.1	PF02212,PF00350,PF01031	PTHR11566,PTHR11566:SF80				GO:0005525,GO:0003924	AT3G60190.1	ADL1E,ADL4,ADLP2,DL1E,DRP1E,EDR3	DYNAMIN-like 1E	K1
929	VIT_215s0021g00890	1.42827	7.39069	2.37688	4.24848	4.59765	0.774495	2.76414	4.48018	38040844	VIT_215s0021g00890.1	VIT_215s0021g00890.1	PF13639	PTHR14155,PTHR14155:SF129			K10663	GO:0008270,GO:0005515	AT3G60220.1	ATL4,TL4	TOXICOS EN LEVADURA 4	K1
930	VIT_215s0021g00990	17.8759	36.065	25.4275	21.0937	28.8414	15.9294	16.3616	35.44	38040685	VIT_215s0021g00990.1	VIT_215s0021g00990.1	PF06943,PF00656	PTHR31773,PTHR31773:SF11	KOG1546			GO:0006508,GO:0004197	AT1G02170.1	AMC1,ATMC1,ATMCPB1,LOL3,MCP1B	metacaspase 1	K1
931	VIT_215s0021g01150	3.02302	1.00626	0.278093	0.355762	6.08286	2.50202	2.9863	6.33371	38040993	VIT_215s0021g01150.1	VIT_215s0021g01150.1	PF03407	PTHR24015,PTHR24015:SF817					AT1G28710.3		Nucleotide-diphospho-sugar transferase family protein	K1
932	VIT_215s0021g01660	0.525991	0.0550653	0.0352957	0.092457	2.91101	0.268824	0.57498	2.52539	38040261	VIT_215s0021g01660.1	VIT_215s0021g01660.1	PF00690,PF00702,PF00122	PTHR24093,PTHR24093:SF264		3.6.3.6	K01535	GO:0046872,GO:0000166	AT3G60330.2	AHA7,HA7	H(+)-ATPase 7	K1
933	VIT_215s0021g01910	18.615	13.1904	12.4525	17.7741	18.5562	15.7739	13.9594	20.2363	38040928	VIT_215s0021g01910.1	VIT_215s0021g01910.1	PF08164,PF13339	PTHR15565,PTHR15565:SF0			K14782	GO:0005634	AT5G61330.1		rRNA processing protein-related	K1
934	VIT_215s0021g02090	128.622	136.256	105.366	101.641	162.143	113.099	103.99	216.714	38041738	VIT_215s0021g02090.1	VIT_215s0021g02090.1	PF00684,PF00226,PF01556	PTHR24078,PTHR24078:SF192	KOG0712		K09503	GO:0051082,GO:0031072	AT5G22060.1	ATJ2,J2	DNAJ homologue 2	K1
935	VIT_215s0021g02250	0.505603	0	0.060016	0.501436	0.719869	0.371557	0.301459	0.870645	38040673	VIT_215s0021g02250.1	VIT_215s0021g02250.1	PF00319	PTHR11945,PTHR11945:SF176				GO:0046983,GO:0003677	AT5G55690.1		MADS-box transcription factor family protein	K1
936	VIT_215s0021g02570	12.9906	10.8224	13.1991	14.197	14.2643	12.2174	14.7607	15.307	38041729	VIT_215s0021g02570.1	VIT_215s0021g02570.1	PF12842,PF16417,PF16415,PF04054	PTHR13162,PTHR13162:SF9			K12604		AT1G02080.2		transcription regulators	K1
937	VIT_215s0021g02780	7.18858	7.72197	8.8627	10.3109	8.5207	8.40204	9.83038	9.30331	38040579	VIT_215s0021g02780.1	VIT_215s0021g02780.1	PF01909	PTHR23092,PTHR23092:SF1	KOG1906	2.7.7.19		GO:0016779	AT4G00060.1	MEE44	Nucleotidyltransferase family protein	K1
938	VIT_215s0024g00240	6.09884	7.10464	8.18039	8.89791	9.53276	6.5425	9.03298	10.3058	38041353	VIT_215s0024g00240.1	VIT_215s0024g00240.1	PF16910,PF06650,PF16909	PTHR16166,PTHR16166:SF87					AT5G24740.1		Protein of unknown function (DUF1162)	K1
939	VIT_215s0024g00350	13.5072	13.4109	14.3963	16.5927	15.662	14.1678	16.7323	19.3801	38040625	VIT_215s0024g00350.1	VIT_215s0024g00350.1	PF00271,PF00176,PF12054	PTHR10799,PTHR10799:SF753		3.6.4.11	K15192	GO:0005524	AT3G54280.1	ATBTAF1,BTAF1,CHA16,CHR16,RGD3	DNA binding;ATP binding;nucleic acid binding;binding;helicases;ATP binding;DNA binding;helicases	K1
940	VIT_215s0024g00800	46.6613	31.9097	24.7984	21.8707	66.095	51.272	43.428	75.4798	38040243	VIT_215s0024g00800.1	VIT_215s0024g00800.1		PTHR31248,PTHR31248:SF3								K1
941	VIT_215s0024g00850	17.8427	21.1749	19.1696	15.5859	15.4648	19.4474	17.194	19.8134	38040795	VIT_215s0024g00850.1	VIT_215s0024g00850.1	PF00348	PTHR12001,PTHR12001:SF47	KOG0776	2.5.1.85		GO:0008299	AT2G34630.1	GPPS,GPS1	geranyl diphosphate synthase 1	K1
942	VIT_215s0024g00860	14.9858	16.8457	18.1175	20.3348	17.3076	16.8235	19.1549	21.0591	38040822	VIT_215s0024g00860.1	VIT_215s0024g00860.1		PTHR35833,PTHR35833:SF1								K1
943	VIT_215s0024g01363	8.11789	7.38249	8.3968	13.2954	14.505	10.452	7.21285	18.9573	38041592	VIT_215s0024g01363.1	VIT_215s0024g01363.1										K1
944	VIT_215s0024g01670	1.13147	5.2715	0.283583	0	5.3478	2.22357	1.55325	8.49744	38041139	VIT_215s0024g01670.1	VIT_215s0024g01670.1	PF00069,PF01657	PTHR27002,PTHR27002:SF122		2.7.11.1		GO:0006468,GO:0005524,GO:0004672	AT4G05200.1	CRK25	cysteine-rich RLK (RECEPTOR-like protein kinase) 25	K1
945	VIT_215s0024g01700	1.56189	3.90935	0.129366	0.087383	4.30656	1.77285	0.946655	3.19922	38041360	VIT_215s0024g01700.1	VIT_215s0024g01700.1	PF00069,PF01657	PTHR27002,PTHR27002:SF122		2.7.11.1		GO:0006468,GO:0005524,GO:0004672	AT4G38830.1	CRK26	cysteine-rich RLK (RECEPTOR-like protein kinase) 26	K1
946	VIT_215s0045g01250	9.24899	7.67777	10.2127	9.9851	9.73598	8.72433	10.8592	12.5532	38040947	VIT_215s0045g01250.1	VIT_215s0045g01250.1	PF00132,PF00483	PTHR22572,PTHR22572:SF7	KOG1462		K03240	GO:0016779,GO:0009058	AT2G34970.1		Trimeric LpxA-like enzyme	K1
947	VIT_215s0046g00320	61.8518	99.3682	43.6749	34.2189	165.765	80.7011	87.1896	221.214	38042113	VIT_215s0046g00320.1	VIT_215s0046g00320.1	PF00010,PF14215	PTHR11514,PTHR11514:SF47	KOG4395			GO:0046983	AT1G01260.2		basic helix-loop-helix (bHLH) DNA-binding superfamily protein	K1
948	VIT_215s0046g00470	10.28	32.2877	12.7678	8.26762	49.8076	13.6024	16.2239	71.9055	38040200	VIT_215s0046g00470.1	VIT_215s0046g00470.1	PF02212,PF00350,PF01031	PTHR11566,PTHR11566:SF60				GO:0005525,GO:0003924	AT5G42080.1	ADL1,ADL1A,AG68,DL1,DRP1A,RSW9	dynamin-like protein	K1
949	VIT_215s0046g01370	18.1342	16.5603	15.4371	19.4563	29.3139	25.4969	26.5638	30.0585	38041556	VIT_215s0046g01370.1	VIT_215s0046g01370.1	PF00153	PTHR24089,PTHR24089:SF397	KOG0761		K15119		AT4G27940.1	ATMTM1,MTM1	manganese tracking factor for mitochondrial SOD2	K1
950	VIT_215s0046g01440	60.5641	54.2389	48.1813	67.679	94.5304	89.5632	84.8152	160.583	38041140	VIT_215s0046g01440.1	VIT_215s0046g01440.1	PF00170,PF07777,PF16596	PTHR22952,PTHR22952:SF144			K09060	GO:0043565,GO:0006355,GO:0003700	AT2G46270.1	GBF3	G-box binding factor 3	K1
951	VIT_215s0046g02120	0.869361	0.593572	0.834309	0.746395	2.09995	0.972523	0.563128	3.00528	38041074	VIT_215s0046g02120.1	VIT_215s0046g02120.1	PF02891	PTHR10782,PTHR10782:SF4			K04706	GO:0008270,GO:0019789	AT5G41580.1		RING/U-box superfamily protein	K1
952	VIT_215s0046g02180	2.8609	1.55535	1.68171	1.62832	2.42115	1.28251	1.36433	3.02103	38041280	VIT_215s0046g02180.1	VIT_215s0046g02180.1	PF01535,PF12854,PF13041	PTHR24015,PTHR24015:SF771					AT3G61520.1		Pentatricopeptide repeat (PPR) superfamily protein	K1
953	VIT_215s0046g03430	11.311	29.9342	1.43704	1.42154	23.1143	16.4118	8.47773	25.7534	38041945	VIT_215s0046g03430.1	VIT_215s0046g03430.1		PTHR22814,PTHR22814:SF106					AT3G20180.1		Copper transport protein family	K1
954	VIT_215s0046g03500	7.89082	32.4118	1.2617	1.32131	34.7478	25.222	13.8574	38.1193	38041292	VIT_215s0046g03500.1	VIT_215s0046g03500.1		PTHR22814,PTHR22814:SF106					AT3G20180.1		Copper transport protein family	K1
955	VIT_215s0048g00860	0.871469	0.263073	0.184681	0.229867	2.09314	0.383535	0.141141	1.55437	38041041	VIT_215s0048g00860.1	VIT_215s0048g00860.1	PF03999	PTHR19321,PTHR19321:SF7	KOG4302		K16732	GO:0008017,GO:0000910,GO:0000226	AT5G51600.1	ATMAP65-3,MAP65-3,PLE	Microtubule associated protein (MAP65/ASE1) family protein	K1
956	VIT_215s0048g01080	6.15001	84.3608	36.1814	14.23	79.6046	17.5212	11.2074	74.1075	38041138	VIT_215s0048g01080.1	VIT_215s0048g01080.1	PF01476	PTHR33648,PTHR33648:SF1					AT5G62150.1		peptidoglycan-binding LysM domain-containing protein	K1
957	VIT_215s0048g01320	0.914268	0	0.0695293	0.101898	2.14032	0.639143	0.531023	1.54429	38040791	VIT_215s0048g01320.1	VIT_215s0048g01320.1	PF14226,PF03171	PTHR10209,PTHR10209:SF154	KOG0143	1.14.11.12	K05282	GO:0055114,GO:0016491	AT5G51810.1	AT2353,ATGA20OX2,GA20OX2	gibberellin 20 oxidase 2	K1
958	VIT_215s0048g01350	0.876596	5.6435	1.69731	0.569406	23.2264	2.20681	1.01982	20.3828	38040861	VIT_215s0048g01350.1	VIT_215s0048g01350.1	PF07859	PTHR23024,PTHR23024:SF113	KOG1515	3.1.1.1		GO:0016787,GO:0008152	AT2G45600.1		alpha/beta-Hydrolases superfamily protein	K1
959	VIT_215s0048g01365	2.08856	12.3335	4.33381	2.29854	49.8719	2.27461	1.43918	57.21	38040378	VIT_215s0048g01365.1	VIT_215s0048g01365.1	PF07859	PTHR23024,PTHR23024:SF113	KOG1515	3.1.1.1		GO:0016787,GO:0008152	AT2G45600.1		alpha/beta-Hydrolases superfamily protein	K1
960	VIT_215s0048g01590	8.07642	14.6051	22.276	15.0184	44.6483	12.6409	15.3259	47.4069	38041311	VIT_215s0048g01590.1	VIT_215s0048g01590.1	PF00067	PTHR24298,PTHR24298:SF121	KOG0156	1.14.13.152		GO:0055114,GO:0020037,GO:0016705,GO:0005506	AT2G45550.1	CYP76C4	cytochrome P450, family 76, subfamily C, polypeptide 4	K1
961	VIT_215s0048g01600	0.595593	0.799769	2.21037	1.99277	6.75505	0.979974	1.12474	7.24197	38040509	VIT_215s0048g01600.1	VIT_215s0048g01600.1	PF00067	PTHR24298,PTHR24298:SF121	KOG0156	1.14.13.152		GO:0055114,GO:0020037,GO:0016705,GO:0005506	AT2G45550.1	CYP76C4	cytochrome P450, family 76, subfamily C, polypeptide 4	K1
962	VIT_215s0048g01610	0.0355813	0.626126	0.304362	0.171254	1.56253	0	0.0538507	1.12648	38041513	VIT_215s0048g01610.1	VIT_215s0048g01610.1	PF00067	PTHR24298,PTHR24298:SF121				GO:0055114,GO:0020037,GO:0016705,GO:0005506	AT2G45550.1	CYP76C4	cytochrome P450, family 76, subfamily C, polypeptide 4	K1
963	VIT_215s0048g01650	15.036	14.5351	14.8051	17.8679	21.2972	14.5618	17.0785	23.3236	38040153	VIT_215s0048g01650.1	VIT_215s0048g01650.1	PF00400,PF14844,PF15787,PF02138	PTHR13743,PTHR13743:SF16				GO:0005515	AT2G45540.1		WD-40 repeat family protein / beige-related	K1
964	VIT_215s0048g02010	30.2573	19.8868	18.4838	19.9478	36.4831	23.1637	15.5053	51.0107	38040086	VIT_215s0048g02010.1	VIT_215s0048g02010.1	PF07714	PTHR24057,PTHR24057:SF19		2.7.11.1,2.7.11.26		GO:0006468,GO:0004672	AT4G00720.1	ASKTHETA,ATSK32,SK32	shaggy-like protein kinase 32	K1
965	VIT_215s0048g02030	54.3047	50.2696	33.8012	33.962	58.7575	60.0831	64.8621	76.7672	38040117	VIT_215s0048g02030.1	VIT_215s0048g02030.1	PF13639	PTHR14155,PTHR14155:SF92	KOG1493			GO:0008270,GO:0005515	AT3G61180.1		RING/U-box superfamily protein	K1
966	VIT_215s0048g02110	20.1829	28.0987	14.5909	16.3906	18.2626	21.8669	18.3088	24.1609	38040304	VIT_215s0048g02110.1	VIT_215s0048g02110.1	PF03061	PTHR21660,PTHR21660:SF12	KOG3328	3.1.2.20			AT3G61200.1		Thioesterase superfamily protein	K1
967	VIT_215s0048g02380	16.2389	12.2391	15.1733	20.3112	13.4218	15.4664	15.5879	18.2322	38041408	VIT_215s0048g02380.1	VIT_215s0048g02380.1	PF04851,PF14709,PF00271,PF03368,PF02170,PF00636	PTHR14950,PTHR14950:SF3		3.1.26.3	K11592	GO:0016787,GO:0005524,GO:0003677,GO:0016891,GO:0005515,GO:0006396,GO:0004525,GO:0003723	AT1G01040.1	ASU1,ATDCL1,CAF,DCL1,EMB60,EMB76,SIN1,SUS1	dicer-like 1	K1
968	VIT_215s0048g02510	0.509364	0	0	0.053354	0.712738	0.022716	0.320934	0.749078	38040283	VIT_215s0048g02510.1	VIT_215s0048g02510.1	PF00010	PTHR11969,PTHR11969:SF29				GO:0046983	AT2G46810.1		basic helix-loop-helix (bHLH) DNA-binding superfamily protein	K1
969	VIT_215s0107g00210	3.16528	1.8362	1.63131	1.27641	17.1685	9.37258	2.44744	14.4326	38041831	VIT_215s0107g00210.1	VIT_215s0107g00210.1	PF01370	PTHR10366,PTHR10366:SF407	KOG1502	1.1.1.195		GO:0050662,GO:0003824	AT5G19440.1		NAD(P)-binding Rossmann-fold superfamily protein	K1
970	VIT_215s0107g00500	4.17956	5.20432	5.21095	3.89219	5.22337	4.14605	5.01878	6.71422	38041030	VIT_215s0107g00500.1	VIT_215s0107g00500.1	PF13360	PTHR24095,PTHR24095:SF185	KOG4649	1.2.1.31	K00142		AT5G35930.1		AMP-dependent synthetase and ligase family protein	K1
971	VIT_216s0013g00490	3.75509	5.48773	6.5837	7.18993	5.86119	4.84156	6.4413	6.29712	38032512	VIT_216s0013g00490.1	VIT_216s0013g00490.1	PF02463	PTHR19306,PTHR19306:SF6					AT5G61460.1	ATRAD18,MIM,SMC6B	P-loop containing nucleoside triphosphate hydrolases superfamily protein	K1
972	VIT_216s0013g01930	17.1619	16.8955	14.8675	9.51926	29.8702	18.4116	16.3671	35.7671	38033225	VIT_216s0013g01930.1	VIT_216s0013g01930.1	PF03767	PTHR31284,PTHR31284:SF7		3.1.3.2		GO:0003993	AT5G51260.1		HAD superfamily, subfamily IIIB acid phosphatase	K1
973	VIT_216s0022g00030	12.8711	8.69579	10.3767	14.8489	17.163	11.9582	13.0257	16.9779	38033925	VIT_216s0022g00030.1	VIT_216s0022g00030.1	PF16418,PF12842,PF16417,PF16415	PTHR13162,PTHR13162:SF9			K12604		AT1G02080.2		transcription regulators	K1
974	VIT_216s0022g02370	2.70544	0.303745	0.350057	0.278155	5.35028	1.74619	1.89033	3.97512	38032821	VIT_216s0022g02370.1	VIT_216s0022g02370.1	PF14309	PTHR37751					AT5G62170.1			K1
975	VIT_216s0039g00210	0.888079	0.747196	0.437533	0.766712	1.11524	0.543641	0.545382	1.2059	38032081	VIT_216s0039g00210.1	VIT_216s0039g00210.1	PF13041,PF01535	PTHR24015,PTHR24015:SF498					AT4G19191.1		Tetratricopeptide repeat (TPR)-like superfamily protein	K1
976	VIT_216s0039g01060	1.67539	9.75072	5.57276	4.76044	12.5588	3.11792	3.90032	18.4349	38032739	VIT_216s0039g01060.1	VIT_216s0039g01060.1	PF00067	PTHR24298,PTHR24298:SF45	KOG0156			GO:0055114,GO:0020037,GO:0016705,GO:0005506	AT1G64940.1	CYP89A6	cytochrome P450, family 87, subfamily A, polypeptide 6	K1
977	VIT_216s0039g01280	0	0	0	0	0.307364	0.016997	0.0190667	0.324883	38032506	VIT_216s0039g01280.1	VIT_216s0039g01280.1	PF00221	PTHR10362,PTHR10362:SF17		4.3.1.24	K10775		AT2G37040.1	ATPAL1,PAL1	PHE ammonia lyase 1	K1
978	VIT_216s0039g01420	52.6024	27.1929	5.99565	3.81982	76.1484	34.747	34.7099	107.31	38032661	VIT_216s0039g01420.1	VIT_216s0039g01420.1		PTHR35105,PTHR35105:SF2					AT1G64980.1		Nucleotide-diphospho-sugar transferases superfamily protein	K1
979	VIT_216s0039g01460	14.8359	15.3828	11.2529	10.5171	12.2903	11.432	9.61374	18.788	38033626	VIT_216s0039g01460.1	VIT_216s0039g01460.1	PF12537,PF12430	PTHR15948				GO:0016020	AT1G64990.2	GTG1	GPCR-type G protein 1	K1
980	VIT_216s0039g02690	0.99853	0.496914	0.476972	0	1.20246	0.705859	1.03597	1.48914	38032998	VIT_216s0039g02690.1	VIT_216s0039g02690.1	PF13962	PTHR24177,PTHR24177:SF14					AT5G51160.1		Ankyrin repeat family protein	K1
981	VIT_216s0050g00110	3.57463	3.19508	4.61873	6.97776	6.14359	4.81066	5.42798	6.95408	38032425	VIT_216s0050g00110.1	VIT_216s0050g00110.1		PTHR35764,PTHR35764:SF1					AT5G52290.1	SHOC1	shortage in chiasmata 1	K1
982	VIT_216s0050g00850	395.122	310.769	274.287	292.328	508.735	404.733	337.73	458.583	38033658	VIT_216s0050g00850.1	VIT_216s0050g00850.1	PF00168	PTHR32246,PTHR32246:SF17				GO:0005515	AT5G23950.1		Calcium-dependent lipid-binding (CaLB domain) family protein	K1
983	VIT_216s0050g00950	78.7981	76.7392	75.6767	81.5742	123.95	79.3628	83.5194	194.097	38032568	VIT_216s0050g00950.1	VIT_216s0050g00950.1	PF03514	PTHR31636,PTHR31636:SF4					AT5G52510.1	SCL8	SCARECROW-like 8	K1
984	VIT_216s0050g01930	4.43104	8.14158	4.86052	4.57482	8.8432	5.01678	4.86758	14.4431	38033683	VIT_216s0050g01930.1	VIT_216s0050g01930.1	PF00560,PF08263,PF13855,PF00069	PTHR27002,PTHR27002:SF50		2.7.11.1		GO:0005515,GO:0006468,GO:0005524,GO:0004672	AT5G24080.1		Protein kinase superfamily protein	K1
985	VIT_216s0050g01960	2.79327	4.55614	3.4521	3.59765	6.98657	5.74407	4.11873	9.98474	38032567	VIT_216s0050g01960.1	VIT_216s0050g01960.1	PF00069	PTHR27002,PTHR27002:SF50		2.7.11.1		GO:0006468,GO:0005524,GO:0004672	AT5G24080.1		Protein kinase superfamily protein	K1
986	VIT_216s0050g02000	18.9854	16.2693	10.8874	11.2555	31.2646	23.507	35.2941	47.2288	38033559	VIT_216s0050g02000.1	VIT_216s0050g02000.1	PF00400	PTHR13083	KOG1333			GO:0005515	AT3G49660.1		Transducin/WD40 repeat-like superfamily protein	K1
987	VIT_216s0050g02190	56.5057	22.2744	29.58	29.2657	130.259	67.4064	82.2781	112.661	38032961	VIT_216s0050g02190.1	VIT_216s0050g02190.1		PTHR31827,PTHR31827:SF14					AT1G64140.1			K1
988	VIT_216s0050g02400	4.84245	2.10978	0.191825	0	123.017	4.55958	3.7173	103.446	38033501	VIT_216s0050g02400.1	VIT_216s0050g02400.1	PF00847	PTHR31194,PTHR31194:SF16				GO:0006355,GO:0003700	AT4G27950.1	CRF4	cytokinin response factor 4	K1
989	VIT_216s0050g02480	100.84	74.7474	90.5056	66.8946	212.679	153.716	163.609	225.528	38033260	VIT_216s0050g02480.1	VIT_216s0050g02480.1	PF00664,PF00005	PTHR24223,PTHR24223:SF192		3.6.3.44		GO:0055085,GO:0042626,GO:0016021,GO:0006810,GO:0005524,GO:0016887	AT3G59140.1	ATMRP14,MRP14	multidrug resistance-associated protein 14	K1
990	VIT_216s0098g00540	14.7416	15.1997	15.0826	17.4788	13.5935	15.0545	17.1264	19.1742	38033613	VIT_216s0098g00540.1	VIT_216s0098g00540.1	PF12329,PF12325	PTHR13140	KOG4673				AT1G79830.1	GC5	golgin candidate 5	K1
991	VIT_216s0098g00760	264.649	230.968	66.5975	40.8353	628.183	265.411	250.897	411.892	38032634	VIT_216s0098g00760.1	VIT_216s0098g00760.1	PF02365	PTHR31989,PTHR31989:SF5				GO:0006355,GO:0003677	AT5G24590.2	ANAC091,TIP	TCV-interacting protein	K1
992	VIT_216s0098g01020	53.5783	49.1505	42.5952	42.0477	51.4468	41.984	50.0288	63.7985	38032168	VIT_216s0098g01020.1	VIT_216s0098g01020.1	PF00076	PTHR24012,PTHR24012:SF487	KOG0105		K12890	GO:0003676	AT3G49430.2	SRp34a	SER/ARG-rich protein 34A	K1
993	VIT_216s0098g01240	19.4052	19.2057	19.2593	14.8636	14.7601	12.9142	17.896	19.1399	38032142	VIT_216s0098g01240.1	VIT_216s0098g01240.1	PF04520	PTHR33083,PTHR33083:SF18					AT3G15040.1		Protein of unknown function, DUF584	K1
994	VIT_216s0098g01290	39.1049	34.3892	25.3169	19.5365	43.9775	33.2833	23.7778	55.5912	38032732	VIT_216s0098g01290.1	VIT_216s0098g01290.1	PF05631	PTHR23516,PTHR23516:SF4				GO:0016021,GO:0015689,GO:0015098	AT4G27720.1		Major facilitator superfamily protein	K1
995	VIT_216s0098g01630	53.0008	49.9538	55.7505	59.9683	47.9472	47.748	53.4871	62.8053	38033247	VIT_216s0098g01630.1	VIT_216s0098g01630.1	PF03810,PF13513	PTHR10527,PTHR10527:SF19			K14293	GO:0008536,GO:0006886	AT5G53480.1		ARM repeat superfamily protein	K1
996	VIT_216s0098g01805	7.94185	1.30474	1.54962	3.61906	8.8402	4.99316	3.95319	9.6349	38032458	VIT_216s0098g01805.1	VIT_216s0098g01805.1	PF13589	PTHR33566,PTHR33566:SF2					AT5G24280.1	GMI1	gamma-irradiation and mitomycin c induced 1	K1
997	VIT_216s0100g00470	114.004	125.116	72.359	67.9801	206.369	133.832	170.081	283.821	38032889	VIT_216s0100g00470.1	VIT_216s0100g00470.1	PF02179	PTHR12329,PTHR12329:SF11	KOG4361			GO:0051087	AT5G52060.1	ATBAG1,BAG1	BCL-2-associated athanogene 1	K1
998	VIT_216s0115g00070	1.00117	1.07363	0.814721	0.794545	1.5339	1.19908	0.900296	1.84897	38032132	VIT_216s0115g00070.1	VIT_216s0115g00070.1	PF10294,PF08242	PTHR22809,PTHR22809:SF1	KOG2361	2.1.1.268	K00599		AT2G26200.1		S-adenosyl-L-methionine-dependent methyltransferases superfamily protein	K1
999	VIT_217s0000g00290	13.1461	2.69931	3.30984	3.75355	14.2707	5.04053	4.65775	12.7231	38030253	VIT_217s0000g00290.1	VIT_217s0000g00290.1	PF09261,PF01074,PF07748	PTHR11607,PTHR11607:SF18		3.2.1.24	K01191	GO:0008270,GO:0004553,GO:0005975,GO:0004559,GO:0015923,GO:0006013	AT5G13980.1		Glycosyl hydrolase family 38 protein	K1
1000	VIT_217s0000g00400	155.241	151.991	108.415	112.457	486.878	156.978	153.589	462.025	38029783	VIT_217s0000g00400.1	VIT_217s0000g00400.1	PF00153	PTHR24089,PTHR24089:SF283			K15102		AT5G14040.1	PHT3;1	phosphate transporter 3;1	K1
1001	VIT_217s0000g01460	2.48785	2.33208	3.45517	4.78848	4.07679	4.10285	2.44619	6.30386	38031306	VIT_217s0000g01460.1	VIT_217s0000g01460.1	PF00571	PTHR13780,PTHR13780:SF36	KOG1764				AT3G48530.1	KING1	SNF1-related protein kinase regulatory subunit gamma 1	K1
1002	VIT_217s0000g01830	26.9327	23.6659	25.08	26.2414	87.6943	29.7012	37.7329	85.009	38031154	VIT_217s0000g01830.1	VIT_217s0000g01830.1	PF17035,PF00439	PTHR22880,PTHR22880:SF156				GO:0005515	AT5G63320.1	NPX1	nuclear protein X1	K1
1003	VIT_217s0000g01920	16.5186	20.2132	23.5306	23.9703	58.9415	15.3366	16.6277	44.1699	38031605	VIT_217s0000g01920.1	VIT_217s0000g01920.1	PF01422	PTHR12360,PTHR12360:SF0			K12236	GO:0008270,GO:0006355,GO:0005634,GO:0003700	AT1G10170.1	ATNFXL1,NFXL1	NF-X-like 1	K1
1004	VIT_217s0000g02085	33.7591	31.6862	9.89242	9.51573	100.39	49.3637	36.5295	145.3	38029725	VIT_217s0000g02085.1	VIT_217s0000g02085.1										K1
1005	VIT_217s0000g02170	9.2495	9.57736	11.8504	11.4609	9.36765	11.6104	13.877	12.5707	38030075	VIT_217s0000g02170.1	VIT_217s0000g02170.1	PF13855	PTHR15454,PTHR15454:SF7				GO:0005515	AT3G17920.1		Outer arm dynein light chain 1 protein	K1
1006	VIT_217s0000g02190	4.59867	3.79826	4.86354	5.4551	6.70286	4.24251	4.28997	6.27586	38031802	VIT_217s0000g02190.1	VIT_217s0000g02190.1	PF02104	PTHR23427,PTHR23427:SF2				GO:0016020	AT3G17910.1	SURF1	Surfeit locus 1 cytochrome c oxidase biogenesis protein	K1
1007	VIT_217s0000g02400	21.7063	20.527	20.2336	24.9894	22.9057	21.4427	26.5902	26.9169	38030344	VIT_217s0000g02400.1	VIT_217s0000g02400.1	PF13414,PF01425	PTHR11895,PTHR11895:SF39	KOG1211	3.5.1.4		GO:0016884	AT3G17970.1	atToc64-III,TOC64-III	translocon at the outer membrane of chloroplasts 64-III	K1
1008	VIT_217s0000g03030	15.2438	10.2897	10.9943	19.858	14.7215	15.9095	17.7893	21.8708	38030706	VIT_217s0000g03030.1	VIT_217s0000g03030.1	PF00270,PF00035,PF00271,PF07717,PF04408	PTHR18934,PTHR18934:SF112		3.6.4.13	K14442	GO:0005524,GO:0003676,GO:0004386	AT1G48650.1		DEA(D/H)-box RNA helicase family protein	K1
1009	VIT_217s0000g03520	1.04318	0.251142	0.368362	0.183099	0.804606	0.567948	0.398464	1.04917	38030188	VIT_217s0000g03520.1	VIT_217s0000g03520.1	PF13398,PF07714	PTHR27002,PTHR27002:SF113	KOG1187	2.7.11.1		GO:0006468,GO:0004672	AT4G05200.1	CRK25	cysteine-rich RLK (RECEPTOR-like protein kinase) 25	K1
1010	VIT_217s0000g03950	19.6475	12.9779	14.0902	18.4471	21.8742	17.9536	16.4675	24.0833	38030912	VIT_217s0000g03950.1	VIT_217s0000g03950.1	PF03456,PF00400,PF02141	PTHR22844,PTHR22844:SF202	KOG3569			GO:0005515	AT1G49040.1	SCD1	stomatal cytokinesis defective / SCD1 protein (SCD1)	K1
1011	VIT_217s0000g04090	2.53778	0.62584	0.975409	1.41845	2.61626	2.23317	1.7421	3.32855	38030896	VIT_217s0000g04090.1	VIT_217s0000g04090.1	PF10497	PTHR31169,PTHR31169:SF1					AT5G38690.1		Zinc-finger domain of monoamine-oxidase A repressor R1 protein	K1
1012	VIT_217s0000g04200	14.4735	13.506	15.5371	14.8047	21.5441	12.5076	14.3518	19.7973	38030741	VIT_217s0000g04200.1	VIT_217s0000g04200.1	PF01433	PTHR15137			K03128	GO:0008270,GO:0008237	AT1G73960.1	TAF2	TBP-associated factor 2	K1
1013	VIT_217s0000g04360	2.60046	9.92123	0.967527	0.691696	8.15737	4.10944	2.91182	6.76939	38030117	VIT_217s0000g04360.1	VIT_217s0000g04360.1	PF13947,PF00069	PTHR27005,PTHR27005:SF7	KOG1187	2.7.11.1		GO:0030247,GO:0006468,GO:0005524,GO:0004672	AT1G16260.1		Wall-associated kinase family protein	K1
1014	VIT_217s0000g04730	34.7559	42.3354	39.7625	26.0657	31.9276	36.7582	34.7112	42.2274	38030812	VIT_217s0000g04730.1	VIT_217s0000g04730.1	PF13639	PTHR22763,PTHR22763:SF8		6.3.2.19		GO:0008270,GO:0005515	AT5G08139.1		RING/U-box superfamily protein	K1
1015	VIT_217s0000g04810	13.8547	8.9635	11.7339	9.92665	13.604	10.7557	9.45222	14.315	38031668	VIT_217s0000g04810.1	VIT_217s0000g04810.1	PF10250	PTHR31741,PTHR31741:SF5					AT5G15740.1		O-fucosyltransferase family protein	K1
1016	VIT_217s0000g05130	1.90955	2.16327	1.2899	2.61959	2.36597	1.18986	1.74061	2.49683	38030703	VIT_217s0000g05130.1	VIT_217s0000g05130.1	PF02536	PTHR13068,PTHR13068:SF23	KOG1267			GO:0006355,GO:0005739,GO:0003690	AT1G74120.1		Mitochondrial transcription termination factor family protein	K1
1017	VIT_217s0000g05410	6.61055	15.6791	7.32109	5.12717	17.8415	8.61179	6.99088	17.9717	38029756	VIT_217s0000g05410.1	VIT_217s0000g05410.1	PF01762,PF00337	PTHR11214,PTHR11214:SF103	KOG2287	2.4.1.134		GO:0016020,GO:0008378,GO:0006486,GO:0030246	AT5G62620.1		Galactosyltransferase family protein	K1
1018	VIT_217s0000g05460	2.33289	1.1346	2.08886	1.91628	2.82827	3.51725	2.51304	3.39889	38030415	VIT_217s0000g05460.1	VIT_217s0000g05460.1	PF07690,PF06813	PTHR21576,PTHR21576:SF33				GO:0055085,GO:0016021	AT1G74780.1		Nodulin-like / Major Facilitator Superfamily protein	K1
1019	VIT_217s0000g05470	4.88241	7.37834	6.04549	3.99723	8.89885	6.75766	5.88032	11.4092	38031224	VIT_217s0000g05470.1	VIT_217s0000g05470.1	PF07690,PF06813	PTHR21576,PTHR21576:SF33				GO:0055085,GO:0016021	AT1G74780.1		Nodulin-like / Major Facilitator Superfamily protein	K1
1020	VIT_217s0000g05500	15.2525	12.5864	11.6442	16.869	15.671	15.9291	18.0841	17.6745	38031370	VIT_217s0000g05500.1	VIT_217s0000g05500.1	PF00443,PF04781,PF04780	PTHR22975,PTHR22975:SF9		3.4.19.12		GO:0036459,GO:0016579	AT3G47890.1		Ubiquitin carboxyl-terminal hydrolase-related protein	K1
1021	VIT_217s0000g05530	108.608	100.167	63.7818	51.5819	247.577	122.065	114.915	295.523	38031807	VIT_217s0000g05530.1	VIT_217s0000g05530.1	PF00226,PF01556	PTHR24078,PTHR24078:SF317	KOG0714		K09510		AT3G47940.1		DNAJ heat shock family protein	K1
1022	VIT_217s0000g06340	13.3988	11.7264	9.81318	11.7278	9.63251	9.89702	10.0084	13.3253	38030397	VIT_217s0000g06340.1	VIT_217s0000g06340.1	PF00319	PTHR11945,PTHR11945:SF169	KOG0014			GO:0046983,GO:0003677	AT1G18750.1	AGL65	AGAMOUS-like 65	K1
1023	VIT_217s0000g06970	39.2319	19.6813	17.7251	29.6659	61.1131	38.9384	31.2525	98.2733	38031349	VIT_217s0000g06970.1	VIT_217s0000g06970.1	PF00130,PF00781,PF00609	PTHR11255,PTHR11255:SF54		2.7.1.107	K00901	GO:0035556,GO:0016301,GO:0007205,GO:0004143	AT5G07920.1	ATDGK1,DGK1	diacylglycerol kinase1	K1
1024	VIT_217s0000g07230	9.20363	9.10832	9.74771	11.4866	12.2644	9.89713	11.5553	13.6727	38029751	VIT_217s0000g07230.1	VIT_217s0000g07230.1	PF00271,PF00270,PF02889	PTHR24075,PTHR24075:SF0		3.6.4.12	K18663	GO:0005524,GO:0003676,GO:0031204,GO:0008565	AT5G61140.2		U5 small nuclear ribonucleoprotein helicase	K1
1025	VIT_217s0000g07740	1.99191	1.79597	0.966192	1.45855	5.7778	1.97993	1.31808	4.83021	38029890	VIT_217s0000g07740.1	VIT_217s0000g07740.1	PF00730	PTHR10359,PTHR10359:SF31		3.2.2.27	K10773	GO:0006284	AT3G47830.1		DNA glycosylase superfamily protein	K1
1026	VIT_217s0000g08370	7.08755	13.9394	3.78151	5.39736	25.4185	7.21715	6.15049	40.4154	38030517	VIT_217s0000g08370.1	VIT_217s0000g08370.1	PF12174	PTHR32263,PTHR32263:SF6		2.4.2.30			AT1G23550.1	SRO2	similar to RCD one 2	K1
1027	VIT_217s0000g08380	170.524	102.598	139.424	116.586	256.469	147.983	172.513	263.738	38031002	VIT_217s0000g08380.1	VIT_217s0000g08380.1	PF07816	PTHR33095,PTHR33095:SF4					AT1G23710.1		Protein of unknown function (DUF1645)	K1
1028	VIT_217s0000g08930	19.1718	21.6654	18.3225	17.6747	13.935	15.9026	18.5684	19.2399	38030909	VIT_217s0000g08930.1	VIT_217s0000g08930.1	PF00400	PTHR22848			K13111	GO:0005515	AT1G73720.1	SMU1	transducin family protein / WD-40 repeat family protein	K1
1029	VIT_217s0000g09480	22.2354	12.1418	7.63647	6.62961	86.4996	20.2161	22.0226	101.014	38031722	VIT_217s0000g09480.1	VIT_217s0000g09480.1	PF00149	PTHR16509,PTHR16509:SF2		3.6.1.16,3.6.1.53,3.6.1.13	K01517	GO:0016787	AT4G24730.3		Calcineurin-like metallo-phosphoesterase superfamily protein	K1
1030	VIT_217s0000g09760	3.27247	1.1817	0.449229	0.401065	4.21224	4.5326	4.72946	3.64908	38030473	VIT_217s0000g09760.1	VIT_217s0000g09760.1	PF00005,PF00664	PTHR24221,PTHR24221:SF197		3.6.3.44	K05658	GO:0016887,GO:0005524,GO:0055085,GO:0042626,GO:0016021,GO:0006810	AT3G28345.1		ABC transporter family protein	K1
1031	VIT_217s0000g09870	28.9013	44.5582	41.8619	43.2486	39.2078	34.0347	40.4647	60.6471	38031762	VIT_217s0000g09870.1	VIT_217s0000g09870.1	PF02847	PTHR12626,PTHR12626:SF6					AT4G24800.2		MA3 domain-containing protein	K1
1032	VIT_217s0000g09970	4.64395	4.6402	3.55561	2.83621	4.46889	4.69937	3.4754	5.71123	38029726	VIT_217s0000g09970.1	VIT_217s0000g09970.1	PF03372	PTHR22748,PTHR22748:SF1	KOG1294	4.2.99.18		GO:0006281,GO:0004518	AT3G48425.1		DNAse I-like superfamily protein	K1
1033	VIT_217s0000g10020	11.2564	7.12158	12.1901	12.4696	16.0392	9.34085	14.3938	16.2585	38031135	VIT_217s0000g10020.1	VIT_217s0000g10020.1		PTHR12741,PTHR12741:SF5		2.4.1.34			AT2G36850.1	ATGSL08,ATGSL8,CHOR,GSL08,GSL8	glucan synthase-like 8	K1
1034	VIT_217s0119g00030	6.69906	8.33467	6.73307	6.5453	8.74962	6.83572	6.91001	9.61545	38031114	VIT_217s0119g00030.1	VIT_217s0119g00030.1	PF00503	PTHR10218,PTHR10218:SF192	KOG0082			GO:0031683,GO:0019001,GO:0007186,GO:0004871,GO:0003924	AT1G31930.2	XLG3	extra-large GTP-binding protein 3	K1
1035	VIT_217s0119g00120	0.712371	0.600621	0	0	1.45369	0.282296	0	1.38771	38030383	VIT_217s0119g00120.1	VIT_217s0119g00120.1	PF00197	PTHR33107				GO:0004866	AT1G17860.1		Kunitz family trypsin and protease inhibitor protein	K1
1036	VIT_217s0119g00330	11.9666	8.27388	9.48996	10.8129	11.8877	9.89228	10.7189	15.1483	38031803	VIT_217s0119g00330.1	VIT_217s0119g00330.1	PF08424	PTHR13471					AT3G17740.1			K1
1037	VIT_218s0001g00130	34.9703	33.6565	31.4591	28.2783	41.9472	30.5382	41.7575	63.0199	38036978	VIT_218s0001g00130.1	VIT_218s0001g00130.1		PTHR35112					AT1G76250.1			K1
1038	VIT_218s0001g00290	122.203	50.4268	31.3156	25.086	280.383	147.884	161.186	444.222	38036378	VIT_218s0001g00290.1	VIT_218s0001g00290.1	PF13193,PF00501	PTHR24096,PTHR24096:SF186			K10526	GO:0008152,GO:0003824	AT1G20510.1	OPCL1	OPC-8:0 CoA ligase1	K1
1039	VIT_218s0001g00470	3.5506	2.06264	1.36166	0.320274	4.09757	1.52364	1.31602	5.46154	38039073	VIT_218s0001g00470.1	VIT_218s0001g00470.1	PF07731,PF07732,PF00394	PTHR11709,PTHR11709:SF64		1.10.3.2		GO:0055114,GO:0016491,GO:0005507	AT1G76160.1	sks5	SKU5 similar 5	K1
1040	VIT_218s0001g00790	0.738483	0.518516	0.202073	0.569837	2.38288	1.68719	0.925269	1.99853	38019293	VIT_218s0001g00790.1	VIT_218s0001g00790.1	PF07731,PF07732,PF00394	PTHR11709,PTHR11709:SF88		1.10.3.2		GO:0055114,GO:0016491,GO:0005507	AT5G09360.1	LAC14	laccase 14	K1
1041	VIT_218s0001g00860	44.7599	46.9672	47.43	50.2363	44.9388	46.755	56.6615	59.9594	38036256	VIT_218s0001g00860.1	VIT_218s0001g00860.1	PF05001,PF05000,PF04983,PF04990,PF04992,PF00623,PF04998,PF04997	PTHR19376,PTHR19376:SF37		2.7.7.6	K03006	GO:0006366,GO:0005665,GO:0003677,GO:0006351,GO:0003899	AT4G35800.1	NRPB1,RNA_POL_II_LS,RNA_POL_II_LSRNA_POL_II_LS,RPB1	RNA polymerase II large subunit	K1
1042	VIT_218s0001g00990	1.83635	0.736627	1.04286	0.253504	2.57604	1.02744	0.966627	2.42804	38037326	VIT_218s0001g00990.1	VIT_218s0001g00990.1	PF13499,PF00069	PTHR24349,PTHR24349:SF89	KOG0032	2.7.11.1	K13412	GO:0006468,GO:0005524,GO:0004672	AT1G76040.2	CPK29	calcium-dependent protein kinase 29	K1
1043	VIT_218s0001g01700	12.1133	9.5266	9.06037	12.536	15.0485	11.5283	14.2948	20.6076	38037240	VIT_218s0001g01700.1	VIT_218s0001g01700.1	PF07496,PF00856	PTHR22884,PTHR22884:SF276		2.1.1.43		GO:0008270,GO:0005515	AT1G77300.1	ASHH2,CCR1,EFS,SDG8	histone methyltransferases(H3-K4 specific);histone methyltransferases(H3-K36 specific)	K1
1044	VIT_218s0001g01860	11.3172	13.1766	14.8664	13.6912	11.1986	10.9119	12.5341	14.6426	38039016	VIT_218s0001g01860.1	VIT_218s0001g01860.1	PF01043,PF07516,PF07517	PTHR30612,PTHR30612:SF5			K03070	GO:0017038,GO:0016020,GO:0005524	AT1G21650.2		Preprotein translocase SecA family protein	K1
1045	VIT_218s0001g01960	2.6456	5.16493	0.9571	0.619211	84.0897	3.80839	2.34443	80.1538	38037473	VIT_218s0001g01960.1	VIT_218s0001g01960.1	PF00069	PTHR27006,PTHR27006:SF16	KOG1187	2.7.11.1,2.7.10.1		GO:0006468,GO:0005524,GO:0004672	AT1G11050.1		Protein kinase superfamily protein	K1
1046	VIT_218s0001g02080	3.53073	1.45845	3.01458	3.20943	2.76463	3.68748	3.42602	3.74666	38037123	VIT_218s0001g02080.1	VIT_218s0001g02080.1	PF02984,PF00134	PTHR10177,PTHR10177:SF203	KOG0654		K06627	GO:0005634	AT1G44110.1	CYCA1;1	Cyclin A1;1	K1
1047	VIT_218s0001g02300	1272.66	212.809	95.0957	135.062	2555.52	1092.02	1116.02	1586.33	38039731	VIT_218s0001g02300.1	VIT_218s0001g02300.1	PF02365	PTHR31719,PTHR31719:SF16				GO:0006355,GO:0003677	AT1G01720.1	ANAC002,ATAF1	NAC (No Apical Meristem) domain transcriptional regulator superfamily protein	K1
1048	VIT_218s0001g02340	8.17063	9.64648	7.87464	7.03369	13.2253	6.5068	7.34687	19.3148	38036807	VIT_218s0001g02340.1	VIT_218s0001g02340.1	PF00168,PF13646,PF00514	PTHR23315,PTHR23315:SF135	KOG4224			GO:0005515	AT1G77460.1		Armadillo/beta-catenin-like repeat ; C2 calcium/lipid-binding domain (CaLB) protein	K1
1049	VIT_218s0001g02380	5.68886	2.51863	3.03616	4.20283	6.27991	5.48335	4.0273	6.05572	38037097	VIT_218s0001g02380.1	VIT_218s0001g02380.1	PF00225	PTHR24115,PTHR24115:SF487	KOG0242	3.6.4.4	K11498	GO:0008017,GO:0007018,GO:0005524,GO:0003777,GO:0005871	AT1G21730.1		P-loop containing nucleoside triphosphate hydrolases superfamily protein	K1
1050	VIT_218s0001g02420	171.318	91.3503	31.5651	20.5315	335.197	228.988	239.821	337.032	38039265	VIT_218s0001g02420.1	VIT_218s0001g02420.1	PF14543	PTHR13683,PTHR13683:SF316	KOG1339	3.4.23.12		GO:0006508,GO:0004190	AT1G44130.1		Eukaryotic aspartyl protease family protein	K1
1051	VIT_218s0001g02590	1.28455	0.199644	0.0419353	0.0632163	3.05596	1.21044	1.66989	3.70138	38019259	VIT_218s0001g02590.1	VIT_218s0001g02590.1	PF00560,PF08263,PF07714,PF13855	PTHR27000,PTHR27000:SF33	KOG0472	2.7.11.1		GO:0005515,GO:0006468,GO:0004672	AT1G34110.1		Leucine-rich receptor-like protein kinase family protein	K1
1052	VIT_218s0001g03370	11.1615	15.6333	21.6847	20.8782	23.6232	12.5081	11.9111	36.4617	38038857	VIT_218s0001g03370.1	VIT_218s0001g03370.1	PF00773	PTHR23355,PTHR23355:SF9		3.1.13.1	K18758		AT1G77680.1		Ribonuclease II/R family protein	K1
1053	VIT_218s0001g03550	39.5279	33.4553	37.9111	42.8673	92.39	46.1345	51.4167	72.9275	38019053	VIT_218s0001g03550.1	VIT_218s0001g03550.1	PF02597	PTHR33359,PTHR33359:SF1	KOG3474	2.8.1.12	K03635		AT4G10100.3	CNX7,SIR5	co-factor for nitrate, reductase and xanthine dehydrogenase 7	K1
1054	VIT_218s0001g04640	24.2126	121.443	12.314	4.69613	307.487	75.6266	51.0608	399.873	38039132	VIT_218s0001g04640.1	VIT_218s0001g04640.1		PTHR34950,PTHR34950:SF1								K1
1055	VIT_218s0001g04730	22.0687	35.4465	34.4449	35.4647	41.135	22.3534	18.5679	51.3129	38037882	VIT_218s0001g04730.1	VIT_218s0001g04730.1	PF00646,PF01344	PTHR24414,PTHR24414:SF39				GO:0005515	AT1G22040.1		Galactose oxidase/kelch repeat superfamily protein	K1
1056	VIT_218s0001g04980	92.2182	111.185	94.9139	101.209	120.249	89.8019	90.5145	148.808	38038728	VIT_218s0001g04980.1	VIT_218s0001g04980.1	PF00364,PF01039,PF08326	PTHR18866,PTHR18866:SF106		6.4.1.2,6.3.4.14	K11262	GO:0006633,GO:0005524,GO:0003989	AT1G36160.2	ACC1,AT-ACC1,EMB22,GK,PAS3	acetyl-CoA carboxylase 1	K1
1057	VIT_218s0001g05110	16.9783	18.6751	18.4636	18.7993	26.6836	17.7257	18.3045	30.1943	38038154	VIT_218s0001g05110.1	VIT_218s0001g05110.1	PF13087,PF13086	PTHR10887,PTHR10887:SF359			K10706		AT4G30100.1		P-loop containing nucleoside triphosphate hydrolases superfamily protein	K1
1058	VIT_218s0001g05220	304.496	209.349	133.595	202.657	501.373	311.831	301.049	433.301	38038686	VIT_218s0001g05220.1	VIT_218s0001g05220.1	PF00400	PTHR22847,PTHR22847:SF453	KOG4532			GO:0005515	AT1G78070.1		Transducin/WD40 repeat-like superfamily protein	K1
1059	VIT_218s0001g05250	407.28	288.244	75.2127	117.003	638.99	327.434	439.984	666.052	38037761	VIT_218s0001g05250.1	VIT_218s0001g05250.1	PF00847	PTHR31657,PTHR31657:SF9			K09286	GO:0006355,GO:0003700	AT1G78080.1	RAP2.4	related to AP2 4	K1
1060	VIT_218s0001g05530	16.9867	4.88975	5.65542	5.06665	45.0186	18.0829	16.5777	48.9995	38037389	VIT_218s0001g05530.1	VIT_218s0001g05530.1	PF00191	PTHR10502,PTHR10502:SF98	KOG0819			GO:0005544,GO:0005509	AT1G35720.1	ANNAT1,ATOXY5,OXY5	annexin 1	K1
1061	VIT_218s0001g05710	192.897	75.6805	103.582	104.269	390.992	236.303	231.797	284.897	38038295	VIT_218s0001g05710.1	VIT_218s0001g05710.1	PF12695	PTHR10992,PTHR10992:SF837	KOG1454	3.1.1.3			AT5G09430.1		alpha/beta-Hydrolases superfamily protein	K1
1062	VIT_218s0001g06090	0.771579	0.0368647	0	0.0840507	7.12064	0.334814	0	14.0086	38036907	VIT_218s0001g06090.1	VIT_218s0001g06090.1	PF00201	PTHR11926,PTHR11926:SF302		2.4.1.324		GO:0016758,GO:0008152	AT1G22380.1	AtUGT85A3,UGT85A3	UDP-glucosyl transferase 85A3	K1
1063	VIT_218s0001g06120	1.10864	0.0184323	0	0.0228097	13.1227	0.468327	0	18.2729	38037717	VIT_218s0001g06120.1	VIT_218s0001g06120.1	PF00201	PTHR11926,PTHR11926:SF302		2.4.1.324		GO:0016758,GO:0008152	AT1G22380.1	AtUGT85A3,UGT85A3	UDP-glucosyl transferase 85A3	K1
1064	VIT_218s0001g06310	81.6476	102.033	55.6102	47.2086	419.86	116.316	116.968	354.7	38037361	VIT_218s0001g06310.1	VIT_218s0001g06310.1	PF00069	PTHR24343,PTHR24343:SF207	KOG0583	2.7.11.1	K14498	GO:0006468,GO:0005524,GO:0004672	AT1G78290.3	SNRK2-8,SNRK2.8,SRK2C	Protein kinase superfamily protein	K1
1065	VIT_218s0001g06560	150.317	242.833	54.4498	25.8785	287.783	112.11	238.491	279.419	38039144	VIT_218s0001g06560.1	VIT_218s0001g06560.1										K1
1066	VIT_218s0001g06610	81.9193	190.437	29.1095	17.5483	260.513	156.167	147.965	262.075	38037367	VIT_218s0001g06610.1	VIT_218s0001g06610.1		PTHR33735,PTHR33735:SF1					AT2G14095.1			K1
1067	VIT_218s0001g07100	26.8306	20.3308	20.1893	17.6442	240.152	37.8436	37.184	117.762	38038841	VIT_218s0001g07100.1	VIT_218s0001g07100.1	PF10590,PF01243,PF03853	PTHR13232,PTHR13232:SF10	KOG2586	5.1.99.6,1.4.3.5	K17759,K00275	GO:0055114,GO:0016638,GO:0010181,GO:0004733	AT5G49970.1	ATPPOX,PDX3,PPOX	pyridoxin (pyrodoxamine) 5\'-phosphate oxidase	K1
1068	VIT_218s0001g07170	12.3831	11.508	13.0944	11.2902	12.2899	9.92516	10.9602	13.6264	38038772	VIT_218s0001g07170.1	VIT_218s0001g07170.1	PF00400,PF13966	PTHR15574,PTHR15574:SF40			K11807	GO:0005515	AT5G10940.2		transducin family protein / WD-40 repeat family protein	K1
1069	VIT_218s0001g07290	2.97887	1.82147	1.93185	1.44015	2.13038	2.56904	2.12804	2.99471	38037483	VIT_218s0001g07290.1	VIT_218s0001g07290.1		PTHR31110,PTHR31110:SF2					AT4G24610.1			K1
1070	VIT_218s0001g07520	3.48612	3.85632	4.1093	4.05952	3.47926	3.16194	3.97629	5.58495	38039775	VIT_218s0001g07520.1	VIT_218s0001g07520.1	PF00924	PTHR30566,PTHR30566:SF8			K16052	GO:0055085,GO:0016020	AT1G58200.1	MSL3	MSCS-like 3	K1
1071	VIT_218s0001g07710	13.1807	8.51315	9.77406	12.2572	19.4802	10.4825	11.4463	18.3395	38037246	VIT_218s0001g07710.1	VIT_218s0001g07710.1	PF16057,PF13385,PF00400,PF14844,PF15787,PF02138	PTHR13743,PTHR13743:SF83				GO:0005515	AT1G58230.1		binding	K1
1072	VIT_218s0001g07740	11.3871	9.86477	10.9814	15.127	15.5966	11.1646	12.9808	16.7167	38036941	VIT_218s0001g07740.1	VIT_218s0001g07740.1	PF10351	PTHR15678,PTHR15678:SF6					AT1G58250.1	SAB	Golgi-body localisation protein domain ;RNA pol II promoter Fmp27 protein domain	K1
1073	VIT_218s0001g07810	43.3737	51.5472	56.73	64.2984	51.9461	52.3138	59.5968	69.9677	38038558	VIT_218s0001g07810.1	VIT_218s0001g07810.1	PF00627,PF14377,PF06012,PF06025,PF00632	PTHR11254,PTHR11254:SF334		6.3.2.19	K10592	GO:0004842	AT1G70320.1	UPL2	ubiquitin-protein ligase 2	K1
1074	VIT_218s0001g08030	29.7479	36.5398	29.589	25.9815	40.0878	25.0012	33.776	49.2617	38037746	VIT_218s0001g08030.1	VIT_218s0001g08030.1	PF00300	PTHR23029,PTHR23029:SF40	KOG4754				AT1G58280.1		Phosphoglycerate mutase family protein	K1
1075	VIT_218s0001g08140	13.2412	12.2312	12.7364	16.4294	14.7863	12.1851	17.636	20.4777	38036313	VIT_218s0001g08140.1	VIT_218s0001g08140.1	PF12295	PTHR15245,PTHR15245:SF20	KOG1895		K06100		AT1G27595.1			K1
1076	VIT_218s0001g08610	1.18295	0.0492687	0.397447	0.194838	1.7959	1.70024	1.94658	2.38036	38039157	VIT_218s0001g08610.1	VIT_218s0001g08610.1	PF00847	PTHR32467,PTHR32467:SF11			K09285	GO:0006355,GO:0003700,GO:0007275	AT4G37750.1	ANT,CKC,CKC1,DRG	Integrase-type DNA-binding superfamily protein	K1
1077	VIT_218s0001g08670	14.4424	13.6234	11.2226	12.4847	21.402	15.2657	12.1782	22.572	38037011	VIT_218s0001g08670.1	VIT_218s0001g08670.1		PTHR11864,PTHR11864:SF21					AT1G44910.1	ATPRP40A,PRP40A	pre-mRNA-processing protein 40A	K1
1078	VIT_218s0001g08680	27.5341	24.7946	27.3021	31.2225	32.2039	27.2909	26.924	34.5748	38036535	VIT_218s0001g08680.1	VIT_218s0001g08680.1	PF00397,PF01846	PTHR11864,PTHR11864:SF21	KOG0152		K12821	GO:0005515	AT1G44910.1	ATPRP40A,PRP40A	pre-mRNA-processing protein 40A	K1
1079	VIT_218s0001g08760	78.5938	78.8112	41.594	35.3463	88.9315	61.3926	23.3556	135.3	38038914	VIT_218s0001g08760.1	VIT_218s0001g08760.1	PF06404	PTHR33285,PTHR33285:SF3				GO:0008283,GO:0008083,GO:0005576	AT3G49780.1	ATPSK3 (FORMER SYMBOL),ATPSK4,PSK4	phytosulfokine 4 precursor	K1
1080	VIT_218s0001g08850	10.5039	9.24409	8.99627	9.67623	12.0855	8.98521	10.059	12.5242	38038885	VIT_218s0001g08850.1	VIT_218s0001g08850.1	PF00690,PF13246,PF00689,PF00122	PTHR24093,PTHR24093:SF353		3.6.3.8,3.6.3.35	K05853	GO:0046872,GO:0000166	AT1G10130.1	ATECA3,ECA3	endoplasmic reticulum-type calcium-transporting ATPase 3	K1
1081	VIT_218s0001g09180	12.5423	16.8305	17.487	17.9691	12.6807	14.3296	14.5142	17.7167	38036570	VIT_218s0001g09180.1	VIT_218s0001g09180.1	PF02845	PTHR21494,PTHR21494:SF0	KOG4501		K18667	GO:0005515	AT1G27752.1		Ubiquitin system component Cue protein	K1
1082	VIT_218s0001g09220	60.2143	52.107	40.6741	42.9543	101.578	48.9719	42.3511	165.739	38038526	VIT_218s0001g09220.1	VIT_218s0001g09220.1	PF00156	PTHR11776,PTHR11776:SF8	KOG1712	2.4.2.7	K00759	GO:0009116	AT1G27450.1	APT1,ATAPT1	adenine phosphoribosyl transferase 1	K1
1083	VIT_218s0001g09340	6.37187	6.87941	4.26143	2.03453	44.478	9.75231	7.45778	27.0768	38038095	VIT_218s0001g09340.1	VIT_218s0001g09340.1	PF00887	PTHR23310,PTHR23310:SF14				GO:0000062	AT4G24230.6	ACBP3	acyl-CoA-binding domain 3	K1
1084	VIT_218s0001g10870	0.181852	1.86173	0.232881	0.193964	1.38057	1.61021	0.667071	1.3285	38038724	VIT_218s0001g10870.1	VIT_218s0001g10870.1	PF01734	PTHR32176	KOG0513			GO:0006629	AT2G26560.1	PLA IIA,PLA2A,PLP2	phospholipase A 2A	K1
1085	VIT_218s0001g11630	48.244	36.3739	10.6035	6.63962	870.381	50.259	29.5132	584.386	38036738	VIT_218s0001g11630.1	VIT_218s0001g11630.1	PF00067	PTHR24286,PTHR24286:SF50		4.2.1.92	K01723	GO:0055114,GO:0020037,GO:0016705,GO:0005506	AT5G42650.1	AOS,CYP74A,DDE2	allene oxide synthase	K1
1086	VIT_218s0001g12090	8.03132	2.26836	6.90809	4.07378	10.4288	7.97659	11.4648	20.5954	38037147	VIT_218s0001g12090.1	VIT_218s0001g12090.1	PF05903	PTHR12378,PTHR12378:SF11	KOG0324				AT1G47740.1		PPPDE putative thiol peptidase family protein	K1
1087	VIT_218s0001g12890	4.00183	1.82816	0.707387	0.427529	48.9049	3.34443	1.46445	53.9622	38037595	VIT_218s0001g12890.1	VIT_218s0001g12890.1	PF03492	PTHR31009,PTHR31009:SF5		2.1.1.274,2.1.1.273		GO:0008168	AT5G38020.1		S-adenosyl-L-methionine-dependent methyltransferases superfamily protein	K1
1088	VIT_218s0001g12900	10.7237	6.24324	2.70467	3.09212	219.406	12.6831	9.58395	253.845	38039653	VIT_218s0001g12900.1	VIT_218s0001g12900.1	PF03492	PTHR31009		2.1.1.141	K08241	GO:0008168	AT1G19640.1	JMT	jasmonic acid carboxyl methyltransferase	K1
1089	VIT_218s0001g12910	4.33892	7.35301	8.83993	9.91807	7.60464	3.79755	4.86821	10.062	38039839	VIT_218s0001g12910.1	VIT_218s0001g12910.1	PF06090	PTHR14456	KOG4749	2.7.1.158	K10572	GO:0035299,GO:0005524	AT5G42810.1	ATIPK1,IPK1	inositol-pentakisphosphate 2-kinase 1	K1
1090	VIT_218s0001g13060	16.6744	22.2065	22.8031	17.8311	22.6315	16.8753	20.4205	32.0313	38036544	VIT_218s0001g13060.1	VIT_218s0001g13060.1		PTHR31150,PTHR31150:SF8					AT1G75400.1		RING/U-box superfamily protein	K1
1091	VIT_218s0001g13630	212.489	236.428	195.86	194.982	224.928	211.81	204.086	266.259	38036405	VIT_218s0001g13630.1	VIT_218s0001g13630.1	PF00137	PTHR10263,PTHR10263:SF13	KOG0232		K02155	GO:0033177,GO:0015991,GO:0015078	AT4G34720.1	ATVHA-C1,AVA-P1,VHA-C1	ATPase, F0/V0 complex, subunit C protein	K1
1092	VIT_218s0001g13790	54.5211	55.8848	81.7617	74.7781	162.61	51.6066	51.1435	119.212	38039125	VIT_218s0001g13790.1	VIT_218s0001g13790.1	PF00067	PTHR24298,PTHR24298:SF86				GO:0055114,GO:0020037,GO:0016705,GO:0005506	AT4G31500.1	ATR4,CYP83B1,RED1,RNT1,SUR2	cytochrome P450, family 83, subfamily B, polypeptide 1	K1
1093	VIT_218s0001g14080	16.8131	6.01346	8.08976	9.57459	20.1898	17.4277	24.2844	30.9421	38037801	VIT_218s0001g14080.1	VIT_218s0001g14080.1	PF00590	PTHR10882,PTHR10882:SF0	KOG3123	2.1.1.98	K00586	GO:0008168,GO:0008152	AT4G31790.2		Tetrapyrrole (Corrin/Porphyrin) Methylases	K1
1094	VIT_218s0001g14420	19.132	3.66906	0	0	47.6656	9.42241	4.36223	29.7824	38037629	VIT_218s0001g14420.1	VIT_218s0001g14420.1		PTHR36481,PTHR36481:SF2								K1
1095	VIT_218s0001g14640	77.7404	86.0333	90.3431	169.43	352.282	78.6644	115.705	373.277	38038796	VIT_218s0001g14640.1	VIT_218s0001g14640.1	PF15365	PTHR33670,PTHR33670:SF2					AT3G21570.1			K1
1096	VIT_218s0001g14700	151.776	194.27	115.909	84.0328	410.386	180.582	239.071	395.189	38036825	VIT_218s0001g14700.1	VIT_218s0001g14700.1		PTHR34660,PTHR34660:SF1					AT2G17787.1			K1
1097	VIT_218s0001g14940	1.30509	1.31821	0.41574	0.774111	1.04165	1.01236	0.996498	1.2627	38037551	VIT_218s0001g14940.1	VIT_218s0001g14940.1	PF13041,PF01535	PTHR24015,PTHR24015:SF72					AT3G26540.1		Tetratricopeptide repeat (TPR)-like superfamily protein	K1
1098	VIT_218s0001g15460	0.600748	1.39695	0.383826	1.47561	1.83769	0.598903	0.796936	2.31955	38039856	VIT_218s0001g15460.1	VIT_218s0001g15460.1	PF03405	PTHR31155,PTHR31155:SF3		1.14.19.2	K03921	GO:0055114,GO:0045300,GO:0006631	AT1G43800.1		Plant stearoyl-acyl-carrier-protein desaturase family protein	K1
1099	VIT_218s0041g00100	28.7775	26.9143	24.0494	23.4808	28.202	23.1311	23.1569	34.468	38039167	VIT_218s0041g00100.1	VIT_218s0041g00100.1	PF07942	PTHR12303,PTHR12303:SF6	KOG2798				AT2G32170.1		S-adenosyl-L-methionine-dependent methyltransferases superfamily protein	K1
1100	VIT_218s0041g00430	126.742	105.957	95.1977	119.88	304.556	152.216	161.283	345.954	38036475	VIT_218s0041g00430.1	VIT_218s0041g00430.1	PF03765,PF00650	PTHR23324,PTHR23324:SF48	KOG1471				AT4G09160.1		SEC14 cytosolic factor family protein / phosphoglyceride transfer family protein	K1
1101	VIT_218s0041g00650	52.5539	48.3803	49.2191	45.4953	96.6907	59.2561	54.7569	143.156	38037124	VIT_218s0041g00650.1	VIT_218s0041g00650.1	PF07690	PTHR11654,PTHR11654:SF116			K14638	GO:0055085,GO:0016021,GO:0016020,GO:0006810,GO:0005215	AT1G22540.1		Major facilitator superfamily protein	K1
1102	VIT_218s0041g00710	20.4908	14.1653	10.2005	5.65555	74.8036	30.0371	12.4341	88.4238	38039045	VIT_218s0041g00710.1	VIT_218s0041g00710.1	PF00201	PTHR11926,PTHR11926:SF325				GO:0016758,GO:0008152	AT3G16520.3	UGT88A1	UDP-glucosyl transferase 88A1	K1
1103	VIT_218s0041g00740	1.62839	2.41763	0.534406	0.104006	10.5631	2.45139	1.62728	15.3684	38039706	VIT_218s0041g00740.1	VIT_218s0041g00740.1	PF00201	PTHR11926,PTHR11926:SF343	KOG1192			GO:0016758,GO:0008152	AT3G16520.3	UGT88A1	UDP-glucosyl transferase 88A1	K1
1104	VIT_218s0041g01310	0.764171	1.85983	0.129674	0.191502	4.4714	0.953004	1.35634	3.46025	38036723	VIT_218s0041g01310.1	VIT_218s0041g01310.1		PTHR34630,PTHR34630:SF1					AT5G45230.1		Disease resistance protein (TIR-NBS-LRR class) family	K1
1105	VIT_218s0041g01830	12.4937	14.7144	10.2757	11.9682	11.3776	11.8319	11.2962	13.1909	38036640	VIT_218s0041g01830.1	VIT_218s0041g01830.1	PF00389,PF02826	PTHR10996,PTHR10996:SF108	KOG0069	1.1.1.81		GO:0055114,GO:0051287,GO:0016616,GO:0008152	AT1G72190.1		D-isomer specific 2-hydroxyacid dehydrogenase family protein	K1
1106	VIT_218s0041g02060	372.867	26.9772	10.4993	7.9984	1616.98	527.052	501.96	1436.89	38036854	VIT_218s0041g02060.1	VIT_218s0041g02060.1	PF00724	PTHR22893,PTHR22893:SF44	KOG0134	1.3.1.42	K05894	GO:0055114,GO:0016491,GO:0010181	AT1G76690.1	ATOPR2,OPR2	12-oxophytodienoate reductase 2	K1
1107	VIT_218s0041g02080	180.988	83.0099	78.9411	79.705	403.946	238.357	284.494	544.899	38039224	VIT_218s0041g02080.1	VIT_218s0041g02080.1	PF00724	PTHR22893,PTHR22893:SF44	KOG0134	1.3.1.42	K05894	GO:0055114,GO:0016491,GO:0010181	AT1G76690.1	ATOPR2,OPR2	12-oxophytodienoate reductase 2	K1
1108	VIT_218s0041g02260	48.934	10.8399	0	2.72962	81.9327	75.0546	51.4878	105.562	38039768	VIT_218s0041g02260.1	VIT_218s0041g02260.1	PF00724	PTHR22893,PTHR22893:SF44		1.3.1.42		GO:0055114,GO:0016491,GO:0010181	AT1G76690.1	ATOPR2,OPR2	12-oxophytodienoate reductase 2	K1
1109	VIT_218s0041g02270	20.0306	6.56895	4.08227	6.62625	84.8699	38.2872	45.8803	126.823	38038116	VIT_218s0041g02270.1	VIT_218s0041g02270.1	PF00724	PTHR22893,PTHR22893:SF44		1.3.1.42		GO:0055114,GO:0016491,GO:0010181	AT1G76690.1	ATOPR2,OPR2	12-oxophytodienoate reductase 2	K1
1110	VIT_218s0072g00100	67.4926	111.849	80.9481	59.2381	180.51	77.5558	70.8128	180.89	38037117	VIT_218s0072g00100.1	VIT_218s0072g00100.1		PTHR33675,PTHR33675:SF1					AT4G09830.1		Uncharacterised conserved protein UCP009193	K1
1111	VIT_218s0072g00210	5.21708	5.47528	5.69143	7.35306	5.64592	4.73445	5.98511	8.10512	38038809	VIT_218s0072g00210.1	VIT_218s0072g00210.1	PF00856	PTHR22884		2.1.1.43	K11423	GO:0005515	AT1G76710.1	ASHH1,SDG26	SET domain group 26	K1
1112	VIT_218s0072g00260	2.41568	0.723494	0.165238	0.254685	41.9002	1.11254	0.0412383	75.1602	38036276	VIT_218s0072g00260.1	VIT_218s0072g00260.1	PF00847	PTHR31190				GO:0006355,GO:0003700	AT5G61890.1		Integrase-type DNA-binding superfamily protein	K1
1113	VIT_218s0072g00470	8.12314	15.2897	9.105	6.21286	19.2759	10.1697	6.12887	19.7871	38036838	VIT_218s0072g00470.1	VIT_218s0072g00470.1	PF00170	PTHR22952,PTHR22952:SF184			K14432	GO:0043565,GO:0006355,GO:0003700	AT5G44080.1		Basic-leucine zipper (bZIP) transcription factor family protein	K1
1114	VIT_218s0072g00950	5.09765	8.06269	5.58789	4.09131	6.1021	4.16611	6.68674	8.00548	38039966	VIT_218s0072g00950.1	VIT_218s0072g00950.1	PF05653	PTHR12570,PTHR12570:SF22	KOG2922			GO:0016021,GO:0015693,GO:0015095	AT1G71900.1		Protein of unknown function (DUF803)	K1
1115	VIT_218s0072g01020	15.2967	12.9541	10.5933	10.3752	17.8217	12.174	12.3031	18.9657	38037006	VIT_218s0072g01020.1	VIT_218s0072g01020.1	PF04765	PTHR12956,PTHR12956:SF24					AT1G34550.1	EMB2756	Protein of unknown function (DUF616)	K1
1116	VIT_218s0072g01040	10.4192	8.20062	8.73657	9.91213	12.7358	8.56722	7.34041	12.0126	38038524	VIT_218s0072g01040.1	VIT_218s0072g01040.1	PF12899	PTHR31916,PTHR31916:SF3		3.2.1.26		GO:0033926	AT4G09510.1	CINV2	cytosolic invertase 2	K1
1117	VIT_218s0075g00185	8.3893	7.51814	6.8482	8.25407	9.9478	8.69423	9.46837	9.63915	38038169	VIT_218s0075g00185.1	VIT_218s0075g00185.1	PF00270,PF00035,PF00271,PF07717,PF04408	PTHR18934,PTHR18934:SF103		3.6.4.13	K14442	GO:0005524,GO:0003676,GO:0004386	AT5G04895.1		DEA(D/H)-box RNA helicase family protein	K1
1118	VIT_218s0076g00250	15.4949	17.5268	21.7707	17.0373	17.5182	17.8804	12.9928	29.5321	38038053	VIT_218s0076g00250.1	VIT_218s0076g00250.1	PF13347	PTHR19432,PTHR19432:SF38			K15378		AT1G22710.1	ATSUC2,SUC2,SUT1	sucrose-proton symporter 2	K1
1119	VIT_218s0076g00340	1.46865	0.022221	0.107379	0.0275793	2.03099	2.39852	1.94529	2.57318	38038221	VIT_218s0076g00340.1	VIT_218s0076g00340.1	PF00067	PTHR24286,PTHR24286:SF71	KOG0157	1.14.13.93	K07437	GO:0055114,GO:0020037,GO:0016705,GO:0005506	AT5G45340.1	CYP707A3	cytochrome P450, family 707, subfamily A, polypeptide 3	K1
1120	VIT_218s0082g00270	11.1951	8.85924	0.951816	0.329612	76.2409	28.2334	36.4487	122.251	38019109	VIT_218s0082g00270.1	VIT_218s0082g00270.1	PF00847	PTHR31985,PTHR31985:SF3				GO:0006355,GO:0003700	AT1G71520.1		Integrase-type DNA-binding superfamily protein	K1
1121	VIT_218s0089g00080	0.692687	1.27981	1.06797	0.793837	1.23872	0.717722	1.17122	1.79853	38038869	VIT_218s0089g00080.1	VIT_218s0089g00080.1		PTHR23155	KOG0472				AT3G25510.1		disease resistance protein (TIR-NBS-LRR class), putative	K1
1122	VIT_218s0089g00300	0.824709	0.297439	0.510097	0.618748	0.774468	0.563134	0.489884	1.00565	38039799	VIT_218s0089g00300.1	VIT_218s0089g00300.1	PF14432,PF01535	PTHR24015,PTHR24015:SF916					AT1G71420.1		Tetratricopeptide repeat (TPR)-like superfamily protein	K1
1123	VIT_218s0089g00340	9.71762	10.8543	7.83807	8.42505	17.9994	7.37458	7.80971	27.9241	38039715	VIT_218s0089g00340.1	VIT_218s0089g00340.1	PF07738	PTHR12953,PTHR12953:SF1	KOG1396				AT1G71360.1		Galactose-binding protein	K1
1124	VIT_218s0089g00350	54.5213	45.7049	44.0674	53.1829	61.4588	45.9597	47.1009	64.8388	38038752	VIT_218s0089g00350.1	VIT_218s0089g00350.1	PF00169,PF02212,PF01031	PTHR11566,PTHR11566:SF69		3.6.5.5		GO:0005525,GO:0003924	AT1G59610.1	ADL3,CF1,DL3,DRP2B	dynamin-like 3	K1
1125	VIT_218s0089g00620	11.6542	12.1558	13.6924	12.6352	12.063	7.24518	7.3965	17.8326	38037637	VIT_218s0089g00620.1	VIT_218s0089g00620.1	PF03009	PTHR23344,PTHR23344:SF28	KOG2258	3.1.4.46		GO:0008081,GO:0006629,GO:0008889	AT1G71340.1		PLC-like phosphodiesterases superfamily protein	K1
1126	VIT_218s0089g01150	2.33427	0.199863	0	0.0549217	3.60202	1.88902	1.76331	3.34714	38039041	VIT_218s0089g01150.1	VIT_218s0089g01150.1	PF07645,PF13947,PF00069	PTHR27005,PTHR27005:SF7	KOG1187	2.7.11.1		GO:0005509,GO:0030247,GO:0006468,GO:0005524,GO:0004672	AT1G21270.1	WAK2	wall-associated kinase 2	K1
1127	VIT_218s0122g00090	23.3189	28.9157	21.7529	19.5177	27.1641	22.257	24.0045	36.9945	38036584	VIT_218s0122g00090.1	VIT_218s0122g00090.1	PF03151	PTHR11132,PTHR11132:SF132	KOG1441				AT1G76670.1		Nucleotide-sugar transporter family protein	K1
1128	VIT_218s0122g00410	2.88525	2.82922	2.20935	2.56145	3.86776	2.66488	1.85277	3.78467	38036771	VIT_218s0122g00410.1	VIT_218s0122g00410.1		PTHR32219,PTHR32219:SF6					AT1G20970.1			K1
1129	VIT_218s0122g00500	201.262	195.651	101.785	91.2422	444.068	206.077	194.65	395.256	38037015	VIT_218s0122g00500.1	VIT_218s0122g00500.1	PF07716	PTHR22952,PTHR22952:SF117				GO:0043565,GO:0006355,GO:0003700	AT1G42990.1	ATBZIP60,BZIP60	basic region/leucine zipper motif 60	K1
1130	VIT_218s0122g00690	7.32453	5.99355	1.132	0.84324	49.0036	8.06581	2.97478	32.9908	38019108	VIT_218s0122g00690.1	VIT_218s0122g00690.1	PF07732,PF07731,PF00394	PTHR11709,PTHR11709:SF88		1.10.3.2	K05909	GO:0005507,GO:0055114,GO:0016491	AT5G09360.1	LAC14	laccase 14	K1
1131	VIT_218s0122g00970	18.3397	13.3546	14.4163	15.0771	21.2563	16.8394	20.8302	26.2211	38037155	VIT_218s0122g00970.1	VIT_218s0122g00970.1	PF07714,PF06479	PTHR13954,PTHR13954:SF13		2.7.11.1	K08852	GO:0006468,GO:0004672,GO:0006397,GO:0004540	AT2G17520.1	ATIRE1-2,IRE1-2,IRE1A	Endoribonuclease/protein kinase IRE1-like	K1
1132	VIT_218s0122g01280	8.03236	4.0902	4.6909	5.28775	6.58158	6.78137	5.34162	7.54631	38039603	VIT_218s0122g01280.1	VIT_218s0122g01280.1	PF16414,PF02460	PTHR10796,PTHR10796:SF117			K12385	GO:0016020,GO:0008158	AT4G38350.1		Patched family protein	K1
1133	VIT_218s0122g01400	7.38959	3.32055	4.80845	3.68818	5.98587	4.00643	1.6561	6.82612	38037059	VIT_218s0122g01400.1	VIT_218s0122g01400.1	PF03016	PTHR11062,PTHR11062:SF68	KOG1021				AT1G68470.1		Exostosin family protein	K1
1134	VIT_218s0166g00210	17.3633	18.488	16.2265	17.9848	34.4887	17.6838	20.0544	42.1501	38036702	VIT_218s0166g00210.1	VIT_218s0166g00210.1	PF16457,PF01363,PF13713,PF08381,PF00415	PTHR22870,PTHR22870:SF91	KOG1427			GO:0046872	AT5G42140.1		Regulator of chromosome condensation (RCC1) family with FYVE zinc finger domain	K1
1135	VIT_219s0014g00140	7.63961	8.64637	8.32349	8.13706	7.2484	7.34326	8.57493	8.98913	38058521	VIT_219s0014g00140.1	VIT_219s0014g00140.1	PF13385	PTHR11801				GO:0007165,GO:0006355,GO:0005634,GO:0004871,GO:0003700	AT1G17040.1	ATSHA,SHA,STATLA	SH2 domain protein A	K1
1136	VIT_219s0014g00210	22.1396	29.0924	30.3096	28.7691	23.1182	26.3429	21.4244	33.5942	38059610	VIT_219s0014g00210.1	VIT_219s0014g00210.1	PF13423	PTHR24006	KOG1865	3.4.19.12	K11855		AT5G57990.1	UBP23	ubiquitin-specific protease 23	K1
1137	VIT_219s0014g00260	1.21786	0.371266	0.257456	0.535154	3.18076	0.663746	0.395037	3.04706	38060329	VIT_219s0014g00260.1	VIT_219s0014g00260.1		PTHR33405,PTHR33405:SF6	KOG3478				AT3G14750.1			K1
1138	VIT_219s0014g00270	4.22471	8.85774	2.8581	3.15941	10.609	5.4695	4.21938	13.6174	38059541	VIT_219s0014g00270.1	VIT_219s0014g00270.1		PTHR33237,PTHR33237:SF9					AT3G14760.1			K1
1139	VIT_219s0014g00290	82.496	111.959	59.6514	40.1109	225.995	79.9004	69.9775	293.85	38059127	VIT_219s0014g00290.1	VIT_219s0014g00290.1	PF01073,PF04321	PTHR10366,PTHR10366:SF385			K12450	GO:0055114,GO:0016616,GO:0006694,GO:0003854	AT1G78570.1	ATRHM1,RHM1,ROL1	rhamnose biosynthesis 1	K1
1140	VIT_219s0014g00750	1.90809	3.1524	1.71253	1.98496	2.26982	1.88284	1.16386	3.31636	38058516	VIT_219s0014g00750.1	VIT_219s0014g00750.1	PF11721,PF07714	PTHR27006,PTHR27006:SF14	KOG1187	2.7.11.1		GO:0006468,GO:0004672	AT1G53440.1		Leucine-rich repeat transmembrane protein kinase	K1
1141	VIT_219s0014g01220	0.882411	3.252	0.686701	0.236199	2.86103	2.28241	4.5509	3.65389	38058485	VIT_219s0014g01220.1	VIT_219s0014g01220.1	PF14144	PTHR22952,PTHR22952:SF210				GO:0043565,GO:0006351	AT5G45830.1	ATDOG1,DOG1,GSQ5	delay of germination 1	K1
1142	VIT_219s0014g01440	47.4485	43.7636	44.9534	52.9721	47.6644	45.207	57.98	74.4621	38060177	VIT_219s0014g01440.1	VIT_219s0014g01440.1	PF00013,PF00076,PF16275	PTHR11208,PTHR11208:SF45			K13095	GO:0003723,GO:0003676,GO:0045131,GO:0000398	AT5G51300.3		splicing factor-related	K1
1143	VIT_219s0014g01710	74.4418	26.9543	12.2879	19.6746	210.533	69.6032	81.1794	222.18	38058417	VIT_219s0014g01710.1	VIT_219s0014g01710.1	PF01699,PF13499	PTHR10891,PTHR10891:SF633				GO:0055085,GO:0016021	AT1G53210.1		sodium/calcium exchanger family protein / calcium-binding EF hand family protein	K1
1144	VIT_219s0014g01740	10.6367	3.74094	4.45833	5.77099	8.43632	6.29505	13.4406	14.0927	38060428	VIT_219s0014g01740.1	VIT_219s0014g01740.1	PF13499,PF01699	PTHR10891,PTHR10891:SF386				GO:0055085,GO:0016021	AT1G53210.1		sodium/calcium exchanger family protein / calcium-binding EF hand family protein	K1
1145	VIT_219s0014g01820	0.270087	0.262839	0.901934	0	2.1269	0	0.772494	1.44898	38060644	VIT_219s0014g01820.1	VIT_219s0014g01820.1	PF00025	PTHR24073,PTHR24073:SF457	KOG0087		K07904	GO:0005525	AT5G60860.1	AtRABA1f,RABA1f	RAB GTPase homolog A1F	K1
1146	VIT_219s0014g02580	3.04928	1.86732	1.20898	0.778224	3.19284	3.15578	2.59653	4.55583	38060802	VIT_219s0014g02580.1	VIT_219s0014g02580.1	PF01397,PF03936	PTHR31225,PTHR31225:SF15		4.2.3.22,4.2.3.75		GO:0016829,GO:0010333,GO:0008152,GO:0000287	AT5G23960.2	ATTPS21,TPS21	terpene synthase 21	K1
1147	VIT_219s0014g02620	0.347739	0.121756	0.322211	0.217287	0.630916	0.532998	0.19683	1.13236	38059142	VIT_219s0014g02620.1	VIT_219s0014g02620.1	PF01453,PF08276,PF00954,PF00069	PTHR27002,PTHR27002:SF150	KOG1187	2.7.11.1		GO:0048544,GO:0006468,GO:0005524,GO:0004672	AT2G19130.1		S-locus lectin protein kinase family protein	K1
1148	VIT_219s0014g02630	41.8332	31.8713	21.9539	28.4362	103.067	42.6715	16.2176	91.1077	38059085	VIT_219s0014g02630.1	VIT_219s0014g02630.1		PTHR32219					AT4G27500.1	PPI1	proton pump interactor 1	K1
1149	VIT_219s0014g02640	52.6832	35.9351	37.3342	37.6885	122.682	43.6422	31.3964	104.736	38060294	VIT_219s0014g02640.1	VIT_219s0014g02640.1		PTHR32219,PTHR32219:SF2				GO:0010155,GO:0005886,GO:0005783	AT4G27500.1	PPI1	proton pump interactor 1	K1
1150	VIT_219s0014g02650	36.9457	26.8681	25.7251	33.5431	59.261	36.3045	34.5239	81.8617	38059370	VIT_219s0014g02650.1	VIT_219s0014g02650.1	PF02485	PTHR19297,PTHR19297:SF75	KOG0799			GO:0016020,GO:0008375	AT4G27480.1		Core-2/I-branching beta-1,6-N-acetylglucosaminyltransferase family protein	K1
1151	VIT_219s0014g02710	12.6584	13.3147	11.8625	12.3502	10.9413	11.1156	10.7097	14.5211	38060436	VIT_219s0014g02710.1	VIT_219s0014g02710.1	PF04765	PTHR12956,PTHR12956:SF30					AT1G53040.1		Protein of unknown function (DUF616)	K1
1152	VIT_219s0014g02990	30.4323	25.8535	29.2333	32.7709	25.9867	29.5628	33.1046	35.5718	38060407	VIT_219s0014g02990.1	VIT_219s0014g02990.1	PF01926,PF08153	PTHR11089,PTHR11089:SF9			K14537	GO:0005525,GO:0005730	AT1G52980.1		GTP-binding family protein	K1
1153	VIT_219s0014g03510	69.6498	80.7399	57.5236	62.4522	102.278	61.4154	55.623	128.262	38058802	VIT_219s0014g03510.1	VIT_219s0014g03510.1	PF01412	PTHR23180,PTHR23180:SF160	KOG0703		K12486	GO:0005096	AT5G54310.1	AGD5,NEV	ARF-GAP domain 5	K1
1154	VIT_219s0014g03790	0.677168	0.410955	0.146807	0.175745	1.15843	0.0333477	0.300946	1.95159	38059279	VIT_219s0014g03790.1	VIT_219s0014g03790.1	PF00781,PF00609	PTHR11255,PTHR11255:SF29		2.7.1.107	K00901	GO:0016301,GO:0007205,GO:0004143	AT2G20900.3	ATDGK5,DGK5	diacylglycerol kinase 5	K1
1155	VIT_219s0014g03920	15.4345	17.0577	16.2015	16.4142	17.1651	14.6488	15.9073	19.1773	38059620	VIT_219s0014g03920.1	VIT_219s0014g03920.1	PF13423,PF02148,PF00627	PTHR24006,PTHR24006:SF449		3.4.19.12	K11836	GO:0008270	AT3G20630.1	ATUBP14,PER1,TTN6,UBP14	ubiquitin-specific protease 14	K1
1156	VIT_219s0014g04660	52.037	61.8774	35.2966	46.6446	119.32	63.1634	31.3933	100.3	38060043	VIT_219s0014g04660.1	VIT_219s0014g04660.1	PF03358	PTHR30546	KOG3135	1.6.5.2	K03809	GO:0016491	AT5G54500.1	FQR1	flavodoxin-like quinone reductase 1	K1
1157	VIT_219s0014g05040	17.8034	18.4392	7.31155	8.48671	139.415	23.6494	21.7977	141.933	38060672	VIT_219s0014g05040.1	VIT_219s0014g05040.1	PF02181	PTHR23213,PTHR23213:SF195					AT5G54650.1	ATFH5,Fh5	formin homology5	K1
1158	VIT_219s0014g05230	5.34753	2.93674	4.91579	4.23424	5.06261	3.58412	3.32156	7.23978	38059281	VIT_219s0014g05230.1	VIT_219s0014g05230.1	PF01535,PF13812	PTHR24015,PTHR24015:SF623					AT4G04790.1		Tetratricopeptide repeat (TPR)-like superfamily protein	K1
1159	VIT_219s0015g00130	113.74	82.1992	56.4297	37.9772	475.076	160.213	137.537	638.838	38058706	VIT_219s0015g00130.1	VIT_219s0015g00130.1	PF00132,PF06426	PTHR23416,PTHR23416:SF56	KOG4750	2.3.1.30	K00640	GO:0009001,GO:0006535,GO:0005737	AT1G55920.1	ATSERAT2;1,SAT1,SAT5,SERAT2;1	serine acetyltransferase 2;1	K1
1160	VIT_219s0015g00460	5.26312	1.84664	2.94091	4.77637	5.18368	3.94136	3.70013	6.01138	38058934	VIT_219s0015g00460.1	VIT_219s0015g00460.1	PF13087,PF13086	PTHR10887,PTHR10887:SF369	KOG1801		K10706		AT4G15570.1	MAA3	P-loop containing nucleoside triphosphate hydrolases superfamily protein	K1
1161	VIT_219s0015g01730	11.5625	10.1382	9.22948	10.1853	10.349	9.58991	9.16921	11.859	38060462	VIT_219s0015g01730.1	VIT_219s0015g01730.1	PF00485,PF14681	PTHR10285,PTHR10285:SF75		2.4.2.9,2.7.1.48	K00876	GO:0016301,GO:0008152,GO:0005524	AT4G26510.2	UKL4	uridine kinase-like 4	K1
1162	VIT_219s0015g02700	235.246	12.8903	7.89494	11.6788	1023.46	270.245	190.968	656.996	38059429	VIT_219s0015g02700.1	VIT_219s0015g02700.1	PF14497,PF02798	PTHR11260,PTHR11260:SF230	KOG0406	2.5.1.18	K00799	GO:0005515	AT1G78380.1	ATGSTU19,GST8,GSTU19	glutathione S-transferase TAU 19	K1
1163	VIT_219s0015g02730	35.4111	0.628022	0.444673	1.35837	262.379	38.2388	28.8131	187.433	38059853	VIT_219s0015g02730.1	VIT_219s0015g02730.1	PF14497,PF02798	PTHR11260,PTHR11260:SF230	KOG0406	2.5.1.18	K00799	GO:0005515	AT1G78380.1	ATGSTU19,GST8,GSTU19	glutathione S-transferase TAU 19	K1
1164	VIT_219s0027g01520	40.8447	41.6269	43.5378	42.6557	36.333	38.9614	43.5106	50.3577	38058392	VIT_219s0027g01520.1	VIT_219s0027g01520.1	PF14370,PF01028,PF02919	PTHR10290,PTHR10290:SF3		5.99.1.2	K03163	GO:0006265,GO:0003918,GO:0003677,GO:0005694,GO:0003917	AT5G55300.1	MGO1,TOP1,TOP1ALPHA	DNA topoisomerase I alpha	K1
1165	VIT_219s0085g01020	13.257	13.3959	13.7126	14.1171	15.3128	12.1066	13.7594	18.4488	38059484	VIT_219s0085g01020.1	VIT_219s0085g01020.1	PF00628,PF13871,PF13872	PTHR12706,PTHR12706:SF13				GO:0005515,GO:0006355	AT1G79350.1	EMB1135	RING/FYVE/PHD zinc finger superfamily protein	K1
1166	VIT_219s0085g01060	10.2181	7.71085	5.62877	7.08774	8.42047	8.87799	7.05292	10.1618	38060614	VIT_219s0085g01060.1	VIT_219s0085g01060.1	PF13371,PF14559	PTHR23082			K15201		AT1G17680.2		tetratricopeptide repeat (TPR)-containing protein	K1
1167	VIT_219s0085g01090	21.0616	19.8759	19.2233	27.802	30.036	22.4244	26.1834	31.7715	38059007	VIT_219s0085g01090.1	VIT_219s0085g01090.1	PF07926	PTHR18898			K09291	GO:0006606	AT1G79280.1	AtTPR,NUA	nuclear pore anchor	K1
1168	VIT_219s0085g01200	13.4289	3.59378	5.30198	8.69726	19.2542	5.64648	6.73115	16.7074	38060116	VIT_219s0085g01200.1	VIT_219s0085g01200.1	PF07722,PF06418	PTHR11550,PTHR11550:SF11		6.3.4.2	K01937	GO:0016787,GO:0006541,GO:0006221,GO:0003883	AT3G12670.1	emb2742	CTP synthase family protein	K1
1169	VIT_219s0090g00060	4.57749	3.65669	4.70328	3.20811	6.14085	3.09286	3.73506	5.76228	38059115	VIT_219s0090g00060.1	VIT_219s0090g00060.1	PF03092	PTHR31585,PTHR31585:SF7				GO:0016021,GO:0006810	AT5G54860.1		Major facilitator superfamily protein	K1
1170	VIT_219s0090g00820	9.82657	3.65769	0.5985	0.751267	356.298	11.1343	5.95948	263.296	38060622	VIT_219s0090g00820.1	VIT_219s0090g00820.1	PF00069	PTHR24361,PTHR24361:SF380	KOG0198	2.7.11.25		GO:0006468,GO:0005524,GO:0004672	AT5G55090.1	MAPKKK15	mitogen-activated protein kinase kinase kinase 15	K1
1171	VIT_219s0090g00920	7.49649	2.76452	2.97553	4.51086	8.0275	5.87547	4.45014	9.03089	38060702	VIT_219s0090g00920.1	VIT_219s0090g00920.1	PF02922,PF00128,PF02806	PTHR10357,PTHR10357:SF119		2.4.1.18	K00700	GO:0005975,GO:0004553,GO:0043169,GO:0003824	AT3G20440.2	BE1,EMB2729	Alpha amylase family protein	K1
1172	VIT_219s0090g01260	14.069	13.4422	12.6722	13.6688	14.6318	13.6881	16.7401	19.284	38060723	VIT_219s0090g01260.1	VIT_219s0090g01260.1	PF01426,PF00628	PTHR12321,PTHR12321:SF44				GO:0003682,GO:0005515	AT3G20280.1		RING/FYVE/PHD zinc finger superfamily protein	K1
1173	VIT_219s0090g01490	169.52	152.92	45.0202	76.1963	245.495	147.652	173.935	281.436	38060149	VIT_219s0090g01490.1	VIT_219s0090g01490.1	PF03009	PTHR23344,PTHR23344:SF8	KOG2258	3.1.4.46		GO:0008081,GO:0006629,GO:0008889	AT5G55480.1	SVL1	SHV3-like 1	K1
1174	VIT_219s0090g01530	26.4967	11.2124	6.23226	15.8629	91.8402	32.4864	27.3527	130.325	38059465	VIT_219s0090g01530.1	VIT_219s0090g01530.1	PF02678,PF05726	PTHR13903,PTHR13903:SF5			K06911		AT1G50590.1		RmlC-like cupins superfamily protein	K1
1175	VIT_219s0090g01690	1.30109	4.36926	2.06591	2.31173	6.35152	2.09672	1.5455	8.1102	38060205	VIT_219s0090g01690.1	VIT_219s0090g01690.1	PF00069	PTHR13902,PTHR13902:SF44	KOG0198	2.7.11.1	K08867	GO:0006468,GO:0005524,GO:0004672	AT5G55560.1		Protein kinase superfamily protein	K1
1176	VIT_219s0093g00110	77.2217	6.97438	6.66843	8.29802	437.178	104.473	74.791	367.383	38060106	VIT_219s0093g00110.1	VIT_219s0093g00110.1	PF14497,PF02798	PTHR11260,PTHR11260:SF230	KOG0406	2.5.1.18	K00799	GO:0005515	AT1G17180.1	ATGSTU25,GSTU25	glutathione S-transferase TAU 25	K1
1177	VIT_219s0093g00150	59.3471	4.88893	3.689	6.0026	264.073	57.7713	45.7996	170.54	38059705	VIT_219s0093g00150.1	VIT_219s0093g00150.1	PF14497,PF02798	PTHR11260,PTHR11260:SF230	KOG0406	2.5.1.18	K00799	GO:0005515	AT1G78380.1	ATGSTU19,GST8,GSTU19	glutathione S-transferase TAU 19	K1
1178	VIT_219s0093g00320	3.61578	0.578064	0.675119	0.503653	9.57493	6.58739	2.14888	10.1788	38059561	VIT_219s0093g00320.1	VIT_219s0093g00320.1	PF00043,PF02798	PTHR11260,PTHR11260:SF195	KOG0406	2.5.1.18	K00799	GO:0005515	AT1G17180.1	ATGSTU25,GSTU25	glutathione S-transferase TAU 25	K1
1179	VIT_219s0093g00480	3.60997	2.51551	3.88721	2.28799	3.1744	2.77685	2.56894	4.01897	38059031	VIT_219s0093g00480.1	VIT_219s0093g00480.1	PF00254	PTHR10516,PTHR10516:SF292	KOG0544	5.2.1.8	K14826	GO:0006457	AT3G12340.1		FKBP-like peptidyl-prolyl cis-trans isomerase family protein	K1
1180	VIT_219s0138g00140	54.712	23.1108	18.7538	21.867	93.2162	58.2526	51.3605	162.879	38059430	VIT_219s0138g00140.1	VIT_219s0138g00140.1	PF00168	PTHR10774,PTHR10774:SF80				GO:0005515	AT1G53590.1	NTMC2T6.1,NTMC2TYPE6.1	Calcium-dependent lipid-binding (CaLB domain) family protein	K1
1181	VIT_219s0177g00070	1926.01	1289.61	1521.8	1118.98	6876	1692.96	1302.53	3669.98	38059719	VIT_219s0177g00070.1	VIT_219s0177g00070.1	PF11976	PTHR10666	KOG0005,KOG0001		K04551,K08770		AT4G05320.6	UBQ10	polyubiquitin 10	K1

## Sheet: K2
	GENE ID	Sample Time Points								X.pacId	Transcript Name	Peptide Name	Pfam	Panther	KOG	ec	KO	GO	Best Hit Arabi. Name	Arabi Symbol	Arabi. Defline	Fit Cluster
		Control	Salt Stress					Recovery
			0 h	0.5 h	2 h	24 h	48 h	4 d	12 d
1	VIT_200s0125g00190	17.5359	13.5666	9.77897	15.129	13.557	16.487	12.7983	8.92391	38049120	VIT_200s0125g00190.1	VIT_200s0125g00190.1	PF02705	PTHR30540,PTHR30540:SF14				GO:0071805,GO:0016020,GO:0015079	AT2G30070.1	ATKT1,ATKT1P,ATKUP1,KT1,KUP1	potassium transporter 1	K2
2	VIT_200s0174g00260	18.1263	9.15747	15.7267	16.2854	11.8461	15.1449	16.1353	9.09686	38050762	VIT_200s0174g00260.1	VIT_200s0174g00260.1	PF13423	PTHR24006	KOG1865	3.4.19.12	K11855		AT5G57990.1	UBP23	ubiquitin-specific protease 23	K2
3	VIT_200s0179g00150	920.208	42.7139	9.11899	211.479	2355.03	818.158	397.131	219.315	38047157	VIT_200s0179g00150.1	VIT_200s0179g00150.1	PF00447	PTHR10015,PTHR10015:SF160	KOG0627		K09419	GO:0043565,GO:0006355,GO:0005634,GO:0003700	AT3G22830.1	AT-HSFA6B,HSFA6B	heat shock transcription factor A6B	K2
4	VIT_200s0194g00030	1812.48	365.45	230.955	654.803	3822.36	1754.7	1091.37	520.461	38049217	VIT_200s0194g00030.1	VIT_200s0194g00030.1	PF02518,PF00183	PTHR11528,PTHR11528:SF49			K04079	GO:0051082,GO:0006950,GO:0006457,GO:0005524	AT5G56000.1	AtHsp90.4,Hsp81.4	HEAT SHOCK PROTEIN 81.4	K2
5	VIT_200s0199g00020	15.2104	17.0839	9.64234	12.626	11.0735	13.5361	12.6426	8.65617	38048797	VIT_200s0199g00020.1	VIT_200s0199g00020.1	PF01205	PTHR16301,PTHR16301:SF0	KOG3299				AT4G38090.1		Ribosomal protein S5 domain 2-like superfamily protein	K2
6	VIT_200s0204g00220	89.8377	67.9082	61.336	67.2029	56.7454	65.556	66.6275	70.7453	38049765	VIT_200s0204g00220.1	VIT_200s0204g00220.1	PF00574	PTHR10381,PTHR10381:SF25	KOG0840	3.4.21.92	K01358		AT4G17040.1	CLPR4	CLP protease R subunit 4	K2
7	VIT_200s0207g00080	7.4373	3.84996	3.14336	3.17989	4.36392	4.40957	4.68055	3.82155	38048590	VIT_200s0207g00080.1	VIT_200s0207g00080.1	PF04142	PTHR10231,PTHR10231:SF25	KOG2234			GO:0016021,GO:0008643,GO:0005351,GO:0000139	AT2G43240.1		Nucleotide-sugar transporter family protein	K2
8	VIT_200s0211g00010	55.7219	27.298	34.9025	42.601	38.3122	38.8118	31.8808	26.3027	38049433	VIT_200s0211g00010.1	VIT_200s0211g00010.1		PTHR31755,PTHR31755:SF2					AT4G37920.1			K2
9	VIT_200s0216g00030	45.2923	41.7655	42.7067	45.8354	40.1631	44.733	39.3553	40.2266	38050252	VIT_200s0216g00030.1	VIT_200s0216g00030.1	PF00076,PF02136	PTHR10693,PTHR10693:SF23	KOG0116			GO:0003676,GO:0006810,GO:0005622	AT3G25150.2		Nuclear transport factor 2 (NTF2) family protein with RNA binding (RRM-RBD-RNP motifs) domain	K2
10	VIT_200s0218g00075	4.83253	2.34472	2.88136	3.34723	2.99544	3.32777	2.80741	2.72762	38049485	VIT_200s0218g00075.1	VIT_200s0218g00075.1	PF00588	PTHR12029	KOG2506	2.1.1.185	K03437	GO:0008173,GO:0006396,GO:0003723	AT4G38020.1		tRNA/rRNA methyltransferase (SpoU) family protein	K2
11	VIT_200s0220g00110	2.65203	1.6551	0.864666	0.756141	1.07228	1.62973	1.08606	1.195	38049179	VIT_200s0220g00110.1	VIT_200s0220g00110.1	PF01842,PF13710,PF10369	PTHR30239,PTHR30239:SF6	KOG2663	2.2.1.6	K01653	GO:0016597,GO:0008152	AT2G31810.1		ACT domain-containing small subunit of acetolactate synthase protein	K2
12	VIT_200s0225g00010	245.538	28.5237	26.7072	111.194	355.553	151.002	60.7872	111.932	38049948	VIT_200s0225g00010.1	VIT_200s0225g00010.1		PTHR36761,PTHR36761:SF1					AT3G26580.1		Tetratricopeptide repeat (TPR)-like superfamily protein	K2
13	VIT_200s0227g00170	28.0466	13.68	21.941	27.6888	27.554	22.3512	22.9747	24.149	38050724	VIT_200s0227g00170.1	VIT_200s0227g00170.1	PF05739	PTHR19957,PTHR19957:SF119				GO:0005515	AT1G16240.2	ATSYP51,SYP51	syntaxin of plants 51	K2
14	VIT_200s0229g00100	3.86356	1.24719	1.16236	1.02016	1.30013	1.24811	0.561371	1.14398	38047199	VIT_200s0229g00100.1	VIT_200s0229g00100.1	PF10250	PTHR31818,PTHR31818:SF3					AT4G16650.1		O-fucosyltransferase family protein	K2
15	VIT_200s0233g00020	12.1	6.15429	7.60526	6.97162	10.1536	6.9975	6.10507	4.51259	38049756	VIT_200s0233g00020.1	VIT_200s0233g00020.1	PF00923	PTHR10683,PTHR10683:SF10	KOG2772	2.2.1.2	K00616	GO:0005975	AT1G12230.1		Aldolase superfamily protein	K2
16	VIT_200s0252g00030	45.7213	26.019	27.3417	39.1029	31.649	35.0891	33.4837	34.0421	38048890	VIT_200s0252g00030.1	VIT_200s0252g00030.1	PF03647	PTHR12668,PTHR12668:SF18	KOG4267			GO:0016020	AT3G57280.1		Transmembrane proteins 14C	K2
17	VIT_200s0252g00060	10.4961	5.67079	6.40582	9.43911	6.5453	8.75999	9.16726	6.87061	38049915	VIT_200s0252g00060.1	VIT_200s0252g00060.1	PF00226,PF00515,PF13414	PTHR22904,PTHR22904:SF339	KOG0550			GO:0005515	AT5G12430.1		Heat shock protein DnaJ with tetratricopeptide repeat	K2
18	VIT_200s0264g00050	45.0457	17.2426	13.0612	31.1519	28.7167	46.6519	23.5845	16.5644	38050395	VIT_200s0264g00050.1	VIT_200s0264g00050.1		PTHR33872,PTHR33872:SF1					AT2G17710.1			K2
19	VIT_200s0264g00130	62.8104	33.8577	41.1665	52.9751	51.9609	52.6661	46.1471	55.4875	38048717	VIT_200s0264g00130.1	VIT_200s0264g00130.1	PF12796	PTHR24198,PTHR24198:SF87	KOG4214				AT5G66055.1	AKRP,EMB16,EMB2036	ankyrin repeat protein	K2
20	VIT_200s0270g00100	11.5504	6.04561	9.33137	9.25759	7.51028	8.68685	7.79542	8.78227	38048493	VIT_200s0270g00100.1	VIT_200s0270g00100.1	PF01866	PTHR10762,PTHR10762:SF1	KOG2648		K07561		AT5G62030.1		diphthamide synthesis DPH2 family protein	K2
21	VIT_200s0283g00030	228.75	66.0642	43.2242	88.4691	114.046	93.0112	83.9228	66.3978	38049471	VIT_200s0283g00030.1	VIT_200s0283g00030.1	PF00262	PTHR11073,PTHR11073:SF1			K08054	GO:0051082,GO:0006457,GO:0005783,GO:0005509	AT5G61790.1	ATCNX1,CNX1	calnexin 1	K2
22	VIT_200s0317g00050	501.048	109.496	105.363	238.016	1028.36	441.21	226.119	135.565	38048044	VIT_200s0317g00050.1	VIT_200s0317g00050.1	PF13410,PF13417	PTHR11260,PTHR11260:SF171	KOG1422	1.8.5.1		GO:0005515	AT1G75270.1	DHAR2	dehydroascorbate reductase 2	K2
23	VIT_200s0317g00140	209.452	92.5607	45.539	45.4183	123.857	191.486	131.164	38.4498	38049410	VIT_200s0317g00140.1	VIT_200s0317g00140.1	PF03081	PTHR12542,PTHR12542:SF26			K07195	GO:0006887,GO:0000145	AT2G39380.1	ATEXO70H2,EXO70H2	exocyst subunit exo70 family protein H2	K2
24	VIT_200s0323g00030	58.8248	21.8286	20.4532	48.8868	80.7914	62.7822	37.0017	47.9688	38048346	VIT_200s0323g00030.1	VIT_200s0323g00030.1	PF13371,PF07719	PTHR22904,PTHR22904:SF382	KOG1308		K09560		AT4G22670.1	AtHip1,HIP1	HSP70-interacting protein 1	K2
25	VIT_200s0324g00040	83.9011	66.7565	60.1274	80.592	64.8065	81.5442	84.2421	83.0097	38049365	VIT_200s0324g00040.1	VIT_200s0324g00040.1	PF00684,PF01556,PF00226	PTHR24078,PTHR24078:SF315	KOG0715		K03686	GO:0051082,GO:0031072	AT2G22360.1		DNAJ heat shock family protein	K2
26	VIT_200s0337g00060	75.3808	62.1131	47.086	45.8623	62.5335	78.9469	58.1823	47.539	38048962	VIT_200s0337g00060.1	VIT_200s0337g00060.1	PF01201	PTHR10394				GO:0006412,GO:0005840,GO:0005622,GO:0003735	AT5G59240.1		Ribosomal protein S8e family protein	K2
27	VIT_200s0357g00020	8.84467	4.87837	2.77475	5.18332	5.83241	3.39461	2.94977	1.58304	38050596	VIT_200s0357g00020.1	VIT_200s0357g00020.1	PF01575	PTHR30272,PTHR30272:SF5		4.2.1.59	K02372		AT5G10160.1		Thioesterase superfamily protein	K2
28	VIT_200s0374g00050	48.0164	23.9833	28.85	30.3654	42.5945	55.2641	35.728	26.6341	38050716	VIT_200s0374g00050.1	VIT_200s0374g00050.1	PF04564	PTHR23315,PTHR23315:SF112		6.3.2.19		GO:0016567,GO:0004842	AT4G21350.1	B80,PUB8	plant U-box 8	K2
29	VIT_200s0404g00060	14.5303	9.80167	12.7217	14.6962	11.0858	13.9956	15.0494	10.6347	38048413	VIT_200s0404g00060.1	VIT_200s0404g00060.1		PTHR11246,PTHR11246:SF5			K12867		AT5G28740.1		Tetratricopeptide repeat (TPR)-like superfamily protein	K2
30	VIT_200s0415g00020	8.30838	3.64197	3.80656	10.4477	6.45205	5.8185	3.32651	5.10523	38049882	VIT_200s0415g00020.1	VIT_200s0415g00020.1		PTHR31755,PTHR31755:SF2					AT4G37920.1			K2
31	VIT_200s0510g00040	22.1579	9.66657	10.7489	14.8289	16.361	15.7006	14.3833	10.5975	38050445	VIT_200s0510g00040.1	VIT_200s0510g00040.1	PF08159	PTHR12202,PTHR12202:SF0	KOG2318			GO:0005634	AT3G01160.1			K2
32	VIT_200s0527g00030	1.75035	0.14789	0	0.042747	0.91669	0.278367	0.311509	0.595404	38049348	VIT_200s0527g00030.1	VIT_200s0527g00030.1	PF01190	PTHR31614,PTHR31614:SF15					AT2G34700.1		Pollen Ole e 1 allergen and extensin family protein	K2
33	VIT_200s0533g00050	140.445	48.6461	25.9349	37.1463	76.686	88.5027	78.1406	58.5474	38047821	VIT_200s0533g00050.1	VIT_200s0533g00050.1										K2
34	VIT_200s0540g00010	6.02845	2.49769	2.75357	4.4701	3.19474	4.58113	3.3996	2.83699	38048542	VIT_200s0540g00010.1	VIT_200s0540g00010.1	PF07714	PTHR27002,PTHR27002:SF1	KOG1187	2.7.11.1		GO:0006468,GO:0004672	AT1G65800.1	ARK2,RK2	receptor kinase 2	K2
35	VIT_200s0540g00020	2.50152	1.3618	1.34963	2.63875	1.53187	2.53925	1.43161	1.50078	38050398	VIT_200s0540g00020.1	VIT_200s0540g00020.1	PF07714,PF00704	PTHR27002,PTHR27002:SF160	KOG2806	3.2.1.14		GO:0006468,GO:0004672,GO:0005975,GO:0004553	AT4G19810.1		Glycosyl hydrolase family protein with chitinase insertion domain	K2
36	VIT_200s0551g00020	190.763	155.894	129.991	143.506	166.335	166.412	156.809	170.609	38048151	VIT_200s0551g00020.1	VIT_200s0551g00020.1	PF00827	PTHR11847	KOG1678			GO:0006412,GO:0005840,GO:0003735	AT4G16720.1		Ribosomal protein L23/L15e family protein	K2
37	VIT_200s0590g00015	0.698434	0	0.042247	0	0.226932	0.532337	0.196719	0.270051	38050469	VIT_200s0590g00015.1	VIT_200s0590g00015.1	PF13456,PF13966	PTHR33033					AT4G29090.1		Ribonuclease H-like superfamily protein	K2
38	VIT_200s0591g00020	26.2613	10.4565	5.58081	30.128	24.4865	19.4955	18.5426	13.0758	38050541	VIT_200s0591g00020.1	VIT_200s0591g00020.1	PF01474	PTHR21337,PTHR21337:SF3		2.5.1.54	K01626	GO:0009073,GO:0003849	AT4G39980.1	DHS1	3-deoxy-D-arabino-heptulosonate 7-phosphate synthase 1	K2
39	VIT_200s0670g00010	62.2032	35.6891	40.6915	54.4168	58.1718	57.9952	47.9304	44.3204	38049791	VIT_200s0670g00010.1	VIT_200s0670g00010.1	PF00118	PTHR11353,PTHR11353:SF22			K09499	GO:0005524,GO:0051082,GO:0006457	AT3G11830.1		TCP-1/cpn60 chaperonin family protein	K2
40	VIT_200s0670g00020	17.9859	7.05815	7.14849	11.1143	13.7037	10.1173	9.5064	8.2255	38048861	VIT_200s0670g00020.1	VIT_200s0670g00020.1	PF00696	PTHR30602,PTHR30602:SF4		2.3.1.1	K14682		AT2G22910.1	NAGS1	N-acetyl-l-glutamate synthase 1	K2
41	VIT_200s0691g00010	46.7904	19.864	7.38844	3.98078	55.0224	45.8807	38.5328	41.3567	38050354	VIT_200s0691g00010.1	VIT_200s0691g00010.1	PF00122,PF00689	PTHR24093,PTHR24093:SF325		3.6.3.8	K01537	GO:0046872,GO:0000166	AT3G63380.1		ATPase E1-E2 type family protein / haloacid dehalogenase-like hydrolase family protein	K2
42	VIT_200s0742g00020	47.6465	39.6171	26.905	40.7505	37.3993	47.2586	43.7044	32.9198	38049864	VIT_200s0742g00020.1	VIT_200s0742g00020.1	PF00276	PTHR12059,PTHR12059:SF5	KOG4089		K02892	GO:0006412,GO:0005840,GO:0003735	AT4G39880.1		Ribosomal protein L23/L15e family protein	K2
43	VIT_200s0771g00010	3.55553	1.69286	1.22946	1.58134	2.26607	1.62921	1.31844	0.806997	38048649	VIT_200s0771g00010.1	VIT_200s0771g00010.1	PF14432,PF01535,PF13041	PTHR24015,PTHR24015:SF720					AT3G49710.1		Pentatricopeptide repeat (PPR) superfamily protein	K2
44	VIT_200s0823g00020	18.4349	10.9164	9.55462	12.8893	15.1892	13.5354	11.0109	13.8299	38047452	VIT_200s0823g00020.1	VIT_200s0823g00020.1	PF00696	PTHR30602,PTHR30602:SF4		2.3.1.1			AT4G37670.2	NAGS2	N-acetyl-l-glutamate synthase 2	K2
45	VIT_200s0865g00030	58.2341	10.4145	6.70097	19.4782	54.1938	48.0103	41.5592	18.4207	38048049	VIT_200s0865g00030.1	VIT_200s0865g00030.1	PF00125,PF16211	PTHR23430	KOG1756		K11251	GO:0003677	AT4G27230.1	HTA2	histone H2A 2	K2
46	VIT_200s0868g00020	918.4	217.553	128.35	356.14	769.897	710.038	530.958	310.231	38048700	VIT_200s0868g00020.1	VIT_200s0868g00020.1	PF00125,PF16211	PTHR23430	KOG1756		K11251	GO:0003677	AT4G27230.2	HTA2	histone H2A 2	K2
47	VIT_200s0880g00020	60.0757	41.3833	40.4095	52.2776	53.1961	48.9918	49.2402	64.0838	38048042	VIT_200s0880g00020.1	VIT_200s0880g00020.1	PF05091	PTHR12399			K03251	GO:0005852,GO:0005737,GO:0003743	AT4G20980.1		Eukaryotic translation initiation factor 3 subunit 7 (eIF-3)	K2
48	VIT_200s0918g00010	7.42086	0.850236	2.59688	1.85084	2.99397	0.748077	2.40802	0.712276	38048357	VIT_200s0918g00010.1	VIT_200s0918g00010.1	PF01535,PF13041	PTHR24015,PTHR24015:SF454					AT2G17670.1		Tetratricopeptide repeat (TPR)-like superfamily protein	K2
49	VIT_200s0920g00020	54.8408	45.5646	54.9533	58.2805	47.8068	53.6025	53.778	60.1491	38049274	VIT_200s0920g00020.1	VIT_200s0920g00020.1		PTHR12663,PTHR12663:SF0	KOG4675	2.1.1.43	K11267		AT5G47690.3		binding	K2
50	VIT_200s1217g00010	70.1759	24.5914	25.3976	48.1591	51.5509	37.1903	34.0822	31.817	38049909	VIT_200s1217g00010.1	VIT_200s1217g00010.1	PF01474	PTHR21337,PTHR21337:SF3		2.5.1.54	K01626	GO:0009073,GO:0003849	AT4G33510.1	DHS2	3-deoxy-d-arabino-heptulosonate 7-phosphate synthase	K2
51	VIT_200s1231g00010	29.7463	20.1729	22.7711	25.0365	25.5555	28.8766	28.1249	27.1789	38047871	VIT_200s1231g00010.1	VIT_200s1231g00010.1	PF02403	PTHR11778,PTHR11778:SF0		6.1.1.11	K01875	GO:0006434,GO:0005737,GO:0005524,GO:0004828,GO:0000166	AT1G11870.3	ATSRS,OVA7,SRS	Seryl-tRNA synthetase	K2
52	VIT_200s1351g00010	125.923	63.2884	63.6735	73.991	77.4675	83.5385	76.7333	84.487	38047061	VIT_200s1351g00010.1	VIT_200s1351g00010.1	PF00076	PTHR24012,PTHR24012:SF436			K14396	GO:0003676	AT5G65260.1		RNA-binding (RRM/RBD/RNP motifs) family protein	K2
53	VIT_200s1455g00010	5.1795	0.193694	0.165196	0.319918	2.41605	1.58324	1.00506	0.738188	38050630	VIT_200s1455g00010.1	VIT_200s1455g00010.1	PF03330,PF01357	PTHR31692,PTHR31692:SF10					AT4G17030.1	AT-EXPR,ATEXLB1,ATEXPR1,ATHEXP BETA 3.1,EXLB1,EXPR	expansin-like B1	K2
54	VIT_200s1569g00010	1749.11	380.526	259.583	624.976	3980	1798.77	975.047	488.702	38048586	VIT_200s1569g00010.1	VIT_200s1569g00010.1	PF00183	PTHR11528,PTHR11528:SF48			K04079	GO:0051082,GO:0006950,GO:0006457,GO:0005524	AT5G56000.1	AtHsp90.4,Hsp81.4	HEAT SHOCK PROTEIN 81.4	K2
55	VIT_200s2038g00010	17.1084	0	20.3814	14.4697	14.6786	12.3844	15.1331	0	38048381	VIT_200s2038g00010.1	VIT_200s2038g00010.1	PF06454	PTHR31142,PTHR31142:SF5					AT4G21790.1	ATTOM1,TOM1	tobamovirus multiplication 1	K2
56	VIT_200s2300g00010	194.767	24.0661	35.1322	144.238	212.465	122.779	58.3563	80.2173	38049942	VIT_200s2300g00010.1	VIT_200s2300g00010.1	PF13813	PTHR31595,PTHR31595:SF13		2.3.1.75			AT3G51970.1	ASAT1,ATASAT1,ATSAT1	acyl-CoA sterol acyl transferase 1	K2
57	VIT_200s2364g00010	61.19	29.7278	35.1275	36.4535	49.6885	66.4223	39.0434	32.9176	38047254	VIT_200s2364g00010.1	VIT_200s2364g00010.1	PF04564	PTHR23315,PTHR23315:SF112		6.3.2.19		GO:0016567,GO:0004842	AT4G21350.1	B80,PUB8	plant U-box 8	K2
58	VIT_201s0010g00680	272.976	77.0048	80.4261	170.45	260.609	192.202	127.705	156.62	38027365	VIT_201s0010g00680.1	VIT_201s0010g00680.1	PF02518,PF00183	PTHR11528,PTHR11528:SF41			K09487	GO:0051082,GO:0006950,GO:0006457,GO:0005524	AT2G04030.1	AtHsp90.5,CR88,EMB1956,Hsp88.1,HSP90.5	Chaperone protein htpG family protein	K2
59	VIT_201s0010g01100	7.29331	3.29044	4.25045	4.0179	4.26605	6.27385	5.20198	2.89848	38027422	VIT_201s0010g01100.1	VIT_201s0010g01100.1		PTHR37227,PTHR37227:SF1					AT3G25545.1			K2
60	VIT_201s0010g01160	15.9057	7.74432	8.69485	12.0717	9.18107	9.91888	9.25823	10.3999	38027156	VIT_201s0010g01160.1	VIT_201s0010g01160.1	PF01529	PTHR22883,PTHR22883:SF35	KOG1313	2.3.1.225		GO:0008270	AT3G18620.1		DHHC-type zinc finger family protein	K2
61	VIT_201s0010g01200	7.70629	5.59619	5.91258	3.51383	4.67259	5.95676	3.8583	5.16048	38026540	VIT_201s0010g01200.1	VIT_201s0010g01200.1	PF01565	PTHR10801,PTHR10801:SF0		1.3.1.72	K09828	GO:0055114,GO:0050660,GO:0016491	AT3G19820.3	CBB1,DIM,DIM1,DWF1,EVE1	cell elongation protein / DWARF1 / DIMINUTO (DIM)	K2
62	VIT_201s0010g01810	41.3079	18.3302	22.1879	28.3678	23.7632	25.4345	20.9223	18.3243	38028971	VIT_201s0010g01810.1	VIT_201s0010g01810.1	PF13371,PF14559	PTHR26312,PTHR26312:SF70					AT3G18420.1		Protein prenylyltransferase superfamily protein	K2
63	VIT_201s0010g02760	42.4322	33.7739	36.9344	40.996	32.2533	41.284	35.9336	44.1259	38027507	VIT_201s0010g02760.1	VIT_201s0010g02760.1	PF00699,PF00547,PF00449,PF01979	PTHR22642,PTHR22642:SF7		3.5.1.5	K01427	GO:0043419,GO:0016151,GO:0016787	AT1G67550.1	URE	urease	K2
64	VIT_201s0010g02770	17.0129	13.5181	8.33392	13.3349	12.9436	14.7886	7.65455	11.2708	38028626	VIT_201s0010g02770.1	VIT_201s0010g02770.1	PF05191,PF00406	PTHR23359,PTHR23359:SF99	KOG3078	2.7.4.3	K00939	GO:0004017,GO:0019205,GO:0006139,GO:0005524	AT5G63400.1	ADK1	adenylate kinase 1	K2
65	VIT_201s0010g03040	21.8872	3.07209	0	0	30.054	35.3468	16.9484	14.1001	38029338	VIT_201s0010g03040.1	VIT_201s0010g03040.1	PF13499	PTHR10891,PTHR10891:SF621	KOG0027		K13448		AT1G76650.3	CML38	calmodulin-like 38	K2
66	VIT_201s0010g03310	25.7192	13.2022	19.4397	21.219	19.9147	21.7797	18.6567	19.609	38029311	VIT_201s0010g03310.1	VIT_201s0010g03310.1	PF13874	PTHR13000	KOG3091		K14308	GO:0005643	AT1G24310.1			K2
67	VIT_201s0010g03600	1423.82	445.055	474.661	553.625	3279.71	1410.07	865.105	343.006	38026693	VIT_201s0010g03600.1	VIT_201s0010g03600.1	PF05755	PTHR33732,PTHR33732:SF2					AT1G67360.1		Rubber elongation factor protein (REF)	K2
68	VIT_201s0010g03660	81.915	38.3441	43.5652	69.2107	55.1068	62.2958	59.5455	43.4207	38028297	VIT_201s0010g03660.1	VIT_201s0010g03660.1	PF04359	PTHR34782,PTHR34782:SF1					AT1G27385.1			K2
69	VIT_201s0010g03920	42.8797	31.5612	26.5645	33.4445	28.484	33.747	34.8408	31.1725	38028489	VIT_201s0010g03920.1	VIT_201s0010g03920.1	PF07889	PTHR31903,PTHR31903:SF0					AT1G24265.2		Protein of unknown function (DUF1664)	K2
70	VIT_201s0011g00590	2.42632	0.510923	1.55888	1.73646	1.83312	3.26351	1.45327	1.91883	38026483	VIT_201s0011g00590.1	VIT_201s0011g00590.1	PF03151	PTHR11132,PTHR11132:SF124	KOG1441		K15283		AT5G46110.4	APE2,TPT	Glucose-6-phosphate/phosphate translocator-related	K2
71	VIT_201s0011g00940	51.031	33.3303	39.3442	39.3411	50.728	56.6211	41.2273	47.9886	38028058	VIT_201s0011g00940.1	VIT_201s0011g00940.1		PTHR36320,PTHR36320:SF1					AT1G30880.1			K2
72	VIT_201s0011g01610	41.9036	17.3224	20.0034	30.1536	31.192	29.1237	21.0142	30.5098	38028962	VIT_201s0011g01610.1	VIT_201s0011g01610.1	PF01230	PTHR23089,PTHR23089:SF3	KOG3275				AT1G31160.1	HINT 2	HISTIDINE TRIAD NUCLEOTIDE-BINDING 2	K2
73	VIT_201s0011g01970	5.80687	1.24896	1.29875	2.81422	3.2548	1.46717	1.23111	2.38256	38026852	VIT_201s0011g01970.1	VIT_201s0011g01970.1	PF01535,PF13041	PTHR24015,PTHR24015:SF421					AT2G35130.1		Tetratricopeptide repeat (TPR)-like superfamily protein	K2
74	VIT_201s0011g01980	7.68588	1.14301	2.22108	2.01846	3.60605	1.64661	2.13397	2.82827	38028535	VIT_201s0011g01980.1	VIT_201s0011g01980.1		PTHR33985,PTHR33985:SF2					AT5G06920.1	FLA21	FASCICLIN-like arabinogalactan protein 21 precursor	K2
75	VIT_201s0011g02100	29.9835	19.3868	14.2726	21.9619	20.4525	27.4083	24.9079	16.2118	38026731	VIT_201s0011g02100.1	VIT_201s0011g02100.1	PF00574	PTHR10381,PTHR10381:SF11	KOG0840	3.4.21.92	K01358		AT5G23140.1	CLPP2,NCLPP7	nuclear-encoded CLP protease P7	K2
76	VIT_201s0011g02180	76.7609	50.2096	49.3463	66.0979	88.3969	63.585	57.8405	69.4291	38028387	VIT_201s0011g02180.1	VIT_201s0011g02180.1	PF00076	PTHR24012,PTHR24012:SF243	KOG4210		K11294	GO:0003676	AT3G18610.1	ATNUC-L2,NUC-L2,PARLL1	nucleolin like 2	K2
77	VIT_201s0011g02420	7.82144	2.44589	2.54132	2.9869	4.60852	9.9273	0.998216	1.73625	38028133	VIT_201s0011g02420.1	VIT_201s0011g02420.1	PF13639	PTHR14155,PTHR14155:SF110				GO:0008270,GO:0005515	AT2G01150.1	RHA2B	RING-H2 finger protein 2B	K2
78	VIT_201s0011g03080	74.6955	55.7362	54.6484	52.2264	51.9203	57.7566	49.4524	55.7518	38027128	VIT_201s0011g03080.1	VIT_201s0011g03080.1	PF00557	PTHR10804,PTHR10804:SF68		3.4.11.18	K01265		AT1G13270.1	MAP1B,MAP1C	methionine aminopeptidase 1B	K2
79	VIT_201s0011g04050	32.7312	18.7849	21.9403	28.0703	25.9445	29.0286	29.1556	23.5213	38028746	VIT_201s0011g04050.1	VIT_201s0011g04050.1	PF01467	PTHR31285,PTHR31285:SF0		2.7.7.3		GO:0009058,GO:0003824	AT2G01220.2		Nucleotidylyl transferase superfamily protein	K2
80	VIT_201s0011g04080	1.28119	0.286027	0.208068	0	0.848944	0.311635	0.168089	0.348223	38029350	VIT_201s0011g04080.1	VIT_201s0011g04080.1	PF13639	PTHR22937,PTHR22937:SF18				GO:0008270,GO:0005515	AT1G73760.1		RING/U-box superfamily protein	K2
81	VIT_201s0011g04320	13.6869	5.52411	6.68807	9.43421	10.1665	11.7266	9.93482	9.5482	38027712	VIT_201s0011g04320.1	VIT_201s0011g04320.1	PF01909,PF04926,PF04928	PTHR10682,PTHR10682:SF10		2.7.7.19	K14376	GO:0016779,GO:0043631,GO:0003723,GO:0004652,GO:0005634	AT1G17980.1	PAPS1	poly(A) polymerase 1	K2
82	VIT_201s0011g04600	13.4993	10.4778	13.5164	13.4021	9.65061	9.65698	11.9999	9.64332	38027762	VIT_201s0011g04600.1	VIT_201s0011g04600.1	PF00085,PF04777	PTHR22897	KOG1731	1.8.3.2	K10758	GO:0045454,GO:0055114,GO:0016972	AT2G01270.1	AtQSOX2,QSOX2	quiescin-sulfhydryl oxidase 2	K2
83	VIT_201s0011g04695	1.74075	0.234814	0.335505	0.695085	1.01942	0.456946	0.385788	0.716762	38029395	VIT_201s0011g04695.1	VIT_201s0011g04695.1	PF02469	PTHR33985,PTHR33985:SF4					AT5G40940.1	FLA20	putative fasciclin-like arabinogalactan protein 20	K2
84	VIT_201s0011g04820	811.414	4.6639	4.50648	44.121	1679.59	634.918	47.4902	12.8045	38028208	VIT_201s0011g04820.1	VIT_201s0011g04820.1	PF00226	PTHR24078					AT1G71000.1		Chaperone DnaJ-domain superfamily protein	K2
85	VIT_201s0011g05850	26.8459	24.7927	22.4775	18.2874	19.7857	23.9062	15.4367	18.3279	38028553	VIT_201s0011g05850.1	VIT_201s0011g05850.1	PF00650	PTHR10174,PTHR10174:SF121	KOG1471				AT1G14820.3		Sec14p-like phosphatidylinositol transfer family protein	K2
86	VIT_201s0011g06020	51.8135	11.9568	26.2643	32.724	34.3044	30.2605	15.2078	22.7334	38028470	VIT_201s0011g06020.1	VIT_201s0011g06020.1	PF01423	PTHR12777	KOG3459		K11096	GO:0030532,GO:0008380	AT2G47640.4		Small nuclear ribonucleoprotein family protein	K2
87	VIT_201s0011g06630	64.8152	52.3089	43.9537	58.8597	66.5014	59.2692	61.4726	69.7284	38027303	VIT_201s0011g06630.1	VIT_201s0011g06630.1	PF00400	PTHR19877			K03246	GO:0005515	AT2G46290.1		Transducin/WD40 repeat-like superfamily protein	K2
88	VIT_201s0026g00340	36.3664	32.7785	31.3617	34.9634	33.5159	34.2463	32.1549	37.8258	38027153	VIT_201s0026g00340.1	VIT_201s0026g00340.1	PF07973,PF02824,PF03129,PF00587	PTHR11451,PTHR11451:SF5		6.1.1.3	K01868	GO:0043039,GO:0016876,GO:0005524,GO:0006418,GO:0004812,GO:0000166	AT5G26830.1		Threonyl-tRNA synthetase	K2
89	VIT_201s0026g00600	13.0503	8.69624	10.0176	15.7683	9.64449	11.3357	11.9695	8.18612	38029505	VIT_201s0026g00600.1	VIT_201s0026g00600.1	PF00560,PF13516	PTHR24106	KOG4308			GO:0005515	AT1G10510.1	emb2004	RNI-like superfamily protein	K2
90	VIT_201s0026g00640	18.581	7.42379	8.18165	15.4323	10.2409	12.6608	11.6656	11.9302	38027517	VIT_201s0026g00640.1	VIT_201s0026g00640.1	PF00271,PF00270	PTHR24031,PTHR24031:SF210	KOG0333	3.6.4.13		GO:0005524,GO:0003676	AT1G59990.1		DEA(D/H)-box RNA helicase family protein	K2
91	VIT_201s0026g00670	34.5614	11.4362	13.9833	26.2675	26.303	26.8396	22.5912	20.7725	38027334	VIT_201s0026g00670.1	VIT_201s0026g00670.1		PTHR35987,PTHR35987:SF2					AT1G10522.1			K2
92	VIT_201s0026g01630	72.2872	57.6375	55.5544	64.8315	52.0809	62.77	59.0446	55.1675	38027654	VIT_201s0026g01630.1	VIT_201s0026g01630.1	PF07063	PTHR31136,PTHR31136:SF1					AT1G07040.1			K2
93	VIT_201s0026g02110	34.8042	19.3371	14.0498	22.5136	24.7444	23.0404	19.51	21.5101	38029484	VIT_201s0026g02110.1	VIT_201s0026g02110.1	PF00163,PF01479	PTHR11831,PTHR11831:SF13	KOG3301		K02997	GO:0019843,GO:0005622,GO:0003723	AT5G39850.1		Ribosomal protein S4	K2
94	VIT_201s0026g02210	7.25912	2.74924	4.24357	6.1697	4.58753	5.43719	5.40606	4.23501	38027621	VIT_201s0026g02210.1	VIT_201s0026g02210.1	PF04603	PTHR15837					AT1G69680.1		Mog1/PsbP/DUF1795-like photosystem II reaction center PsbP family protein	K2
95	VIT_201s0026g02540	339.756	25.3922	30.0096	115.664	583.124	279.545	138.085	85.531	38028491	VIT_201s0026g02540.1	VIT_201s0026g02540.1	PF13639	PTHR22763,PTHR22763:SF77		6.3.2.19		GO:0008270,GO:0005515	AT1G26800.1		RING/U-box superfamily protein	K2
96	VIT_201s0026g02740	8.74124	0.684072	0.953335	2.47722	5.67724	1.73068	0.823132	1.9444	38027042	VIT_201s0026g02740.1	VIT_201s0026g02740.1		PTHR37206,PTHR37206:SF2								K2
97	VIT_201s0113g00560	101.54	57.9792	51.5512	75.449	77.9635	79.988	65.5696	55.2222	38028351	VIT_201s0113g00560.1	VIT_201s0113g00560.1		PTHR37178,PTHR37178:SF1					AT1G13990.1			K2
98	VIT_201s0127g00060	208.496	91.1508	96.5098	158.814	244.167	178.479	133.083	166.353	38026798	VIT_201s0127g00060.1	VIT_201s0127g00060.1	PF01326	PTHR22931,PTHR22931:SF1		2.7.9.4	K08244	GO:0016310,GO:0016301,GO:0005524	AT1G10760.1	GWD,GWD1,SEX1,SOP,SOP1	Pyruvate phosphate dikinase, PEP/pyruvate binding domain	K2
99	VIT_201s0127g00260	55.7924	32.7753	28.8083	34.1356	40.9887	33.2916	25.213	33.0264	38029333	VIT_201s0127g00260.1	VIT_201s0127g00260.1	PF08442,PF16114	PTHR23118		2.3.3.8	K01648		AT1G10670.1	ACLA-1	ATP-citrate lyase A-1	K2
100	VIT_201s0127g00300	21.3489	2.80935	2.93066	9.29134	16.7618	10.8357	6.4943	9.08335	38028477	VIT_201s0127g00300.1	VIT_201s0127g00300.1	PF01985	PTHR31846,PTHR31846:SF5				GO:0003723	AT1G23400.1	ATCAF2,CAF2	RNA-binding CRS1 / YhbY (CRM) domain-containing protein	K2
101	VIT_201s0127g00410	41.576	3.83649	5.21271	18.6559	31.2586	19.8845	11.0827	23.0522	38027879	VIT_201s0127g00410.1	VIT_201s0127g00410.1	PF01985	PTHR31846,PTHR31846:SF5				GO:0003723	AT1G23400.1	ATCAF2,CAF2	RNA-binding CRS1 / YhbY (CRM) domain-containing protein	K2
102	VIT_201s0137g00030	1.11161	0	0	0.399469	1.23169	1.55002	0.434955	0.140274	38029259	VIT_201s0137g00030.1	VIT_201s0137g00030.1	PF13561	PTHR24322,PTHR24322:SF510	KOG0725	1.1.1.288			AT3G42960.1	ASD,ATA1,TA1	TAPETUM 1	K2
103	VIT_201s0137g00250	47.5693	25.9903	33.2793	40.6493	33.6991	46.6534	41.7777	39.0235	38028879	VIT_201s0137g00250.1	VIT_201s0137g00250.1	PF00118	PTHR11353			K09497	GO:0005524	AT1G24510.1		TCP-1/cpn60 chaperonin family protein	K2
104	VIT_201s0137g00300	12.5235	8.49453	9.25966	14.7248	8.12654	12.0656	11.5165	10.3355	38028778	VIT_201s0137g00300.1	VIT_201s0137g00300.1	PF08158,PF05285	PTHR12730,PTHR12730:SF0			K14856	GO:0042273,GO:0030036,GO:0000055	AT1G13160.1		ARM repeat superfamily protein	K2
105	VIT_201s0137g00440	11.3073	7.20484	11.9323	11.1503	7.29366	10.5819	11.2728	10.0693	38027333	VIT_201s0137g00440.1	VIT_201s0137g00440.1	PF07817	PTHR12960,PTHR12960:SF0	KOG2412		K18723	GO:0016973,GO:0005643	AT1G13120.1	emb1745	embryo defective 1745	K2
106	VIT_201s0146g00150	1897.3	19.8716	6.10374	62.4326	4150.73	1647.64	337.245	110.711	38029587	VIT_201s0146g00150.1	VIT_201s0146g00150.1	PF00612,PF02179	PTHR33322,PTHR33322:SF6				GO:0005515,GO:0051087	AT1G12060.1	ATBAG5,BAG5	BCL-2-associated athanogene 5	K2
107	VIT_201s0150g00030	25.4473	13.0947	15.7015	17.5566	12.8311	20.3814	15.8812	15.7038	38027757	VIT_201s0150g00030.1	VIT_201s0150g00030.1	PF00169,PF03114,PF01412	PTHR23180,PTHR23180:SF284				GO:0005737,GO:0005515,GO:0005096	AT5G13300.1	AGD3,SFC,VAN3	ARF GTPase-activating protein	K2
108	VIT_201s0150g00150	13.9781	9	8.89941	13.1139	12.8681	12.9616	9.66463	12.4901	38029410	VIT_201s0150g00150.1	VIT_201s0150g00150.1	PF00587,PF03129	PTHR10745,PTHR10745:SF6		6.1.1.14	K01880	GO:0006418,GO:0005524,GO:0004812,GO:0000166	AT1G29880.1		glycyl-tRNA synthetase / glycine--tRNA ligase	K2
109	VIT_201s0150g00200	68.1345	42.0258	43.7739	55.4057	44.1066	54.8519	50.252	48.8969	38027896	VIT_201s0150g00200.1	VIT_201s0150g00200.1	PF00254	PTHR10516,PTHR10516:SF179		5.2.1.8		GO:0006457	AT5G13410.1		FKBP-like peptidyl-prolyl cis-trans isomerase family protein	K2
110	VIT_201s0150g00210	5.97881	0.359629	1.26777	2.25661	4.81003	4.54146	3.14298	2.00189	38026522	VIT_201s0150g00210.1	VIT_201s0150g00210.1	PF00067	PTHR24286,PTHR24286:SF24		1.14.13.70	K05917	GO:0055114,GO:0020037,GO:0016705,GO:0005506	AT1G11680.1	CYP51,CYP51A2,CYP51G1,EMB1738	CYTOCHROME P450 51G1	K2
111	VIT_201s0150g00590	49.5881	42.6115	40.7188	49.0349	40.2864	46.3208	46.1458	41.2986	38027289	VIT_201s0150g00590.1	VIT_201s0150g00590.1	PF14580	PTHR10552	KOG1644		K11092		AT1G09760.1	U2A\'	U2 small nuclear ribonucleoprotein A	K2
112	VIT_201s0244g00070	13.6023	7.30379	6.34498	8.2018	10.1959	9.49502	6.95589	9.5517	38027583	VIT_201s0244g00070.1	VIT_201s0244g00070.1		PTHR31762,PTHR31762:SF5		3.6.3.1			AT3G48860.2			K2
113	VIT_201s0244g00140	9.17526	6.14898	8.57898	10.5646	6.27954	7.80484	7.33254	6.05538	38027915	VIT_201s0244g00140.1	VIT_201s0244g00140.1	PF00696	PTHR21499,PTHR21499:SF34		2.7.2.4	K00928		AT5G13280.1	AK,AK-LYS1,AK1	aspartate kinase 1	K2
114	VIT_202s0012g00560	98.0371	79.5314	72.5608	82.9059	83.7625	78.828	67.4217	79.0948	38044863	VIT_202s0012g00560.1	VIT_202s0012g00560.1	PF00335	PTHR19282,PTHR19282:SF262				GO:0016021	AT1G32400.1	TOM2A	tobamovirus multiplication 2A	K2
115	VIT_202s0012g00630	13	5.46191	9.65963	8.59306	6.60195	8.28058	8.33355	7.81858	38045335	VIT_202s0012g00630.1	VIT_202s0012g00630.1	PF00249						AT5G45420.1		Duplicated homeodomain-like superfamily protein	K2
116	VIT_202s0012g00900	11.8481	7.06418	7.80466	9.33899	8.24894	11.0847	7.96178	8.5533	38046226	VIT_202s0012g00900.1	VIT_202s0012g00900.1	PF03479	PTHR31500,PTHR31500:SF17					AT4G17950.1		AT hook motif DNA-binding family protein	K2
117	VIT_202s0012g00920	17.9852	14.9205	15.626	14.3885	10.6865	14.8232	14.2503	13.9352	38045761	VIT_202s0012g00920.1	VIT_202s0012g00920.1	PF06419	PTHR21506				GO:0017119,GO:0006891	AT1G31780.1			K2
118	VIT_202s0012g01680	5.29846	3.09621	2.82365	3.52232	2.57533	3.50219	3.05694	2.34704	38046579	VIT_202s0012g01680.1	VIT_202s0012g01680.1	PF02358,PF00982	PTHR10788,PTHR10788:SF48		2.4.1.15,3.1.3.12	K16055	GO:0005992,GO:0003824	AT4G17770.1	ATTPS5,TPS5	trehalose phosphatase/synthase 5	K2
119	VIT_202s0025g00270	22.6892	10.6414	13.7482	17.0901	15.7926	13.938	11.8658	12.6533	38046782	VIT_202s0025g00270.1	VIT_202s0025g00270.1	PF00069	PTHR24055,PTHR24055:SF224		2.7.11.24	K04371	GO:0006468,GO:0005524,GO:0004672	AT4G01370.1	ATMPK4,MPK4	MAP kinase 4	K2
120	VIT_202s0025g00290	12.0984	0.205206	0.946664	0.774471	4.82492	5.64811	3.20732	1.50866	38046232	VIT_202s0025g00290.1	VIT_202s0025g00290.1	PF13041,PF01535	PTHR24015,PTHR24015:SF638					AT4G21300.1		Tetratricopeptide repeat (TPR)-like superfamily protein	K2
121	VIT_202s0025g00310	93.3127	89.3389	67.8958	83.4664	81.8046	85.2474	79.39	91.374	38045511	VIT_202s0025g00310.1	VIT_202s0025g00310.1	PF03501	PTHR12146,PTHR12146:SF7	KOG3344		K02947		AT4G25740.1		RNA binding Plectin/S10 domain-containing protein	K2
122	VIT_202s0025g01250	8.23106	4.14988	5.4144	6.90612	4.74608	8.20435	5.23667	5.75744	38045853	VIT_202s0025g01250.1	VIT_202s0025g01250.1	PF00400	PTHR11024,PTHR11024:SF3	KOG2445			GO:0005515	AT1G64350.1	SEH1H	Transducin/WD40 repeat-like superfamily protein	K2
123	VIT_202s0025g02010	92.444	82.5739	72.0669	80.5139	71.8836	83.63	68.248	73.6635	38046658	VIT_202s0025g02010.1	VIT_202s0025g02010.1	PF10075	PTHR12387	KOG3151		K03031	GO:0006508,GO:0005838	AT1G64520.1	RPN12a	regulatory particle non-ATPase 12A	K2
124	VIT_202s0025g02140	405.331	79.6475	70.7017	136.373	390.779	204.055	149.821	126.567	38045905	VIT_202s0025g02140.1	VIT_202s0025g02140.1	PF00012	PTHR19375,PTHR19375:SF228			K09490		AT5G42020.1	BIP,BIP2	Heat shock protein 70 (Hsp 70) family protein	K2
125	VIT_202s0025g02160	28.0483	25.3939	24.304	26.0966	24.1139	25.7909	27.9866	24.6487	38046461	VIT_202s0025g02160.1	VIT_202s0025g02160.1	PF12848,PF00005	PTHR19211,PTHR19211:SF45		3.6.1.3	K06158	GO:0016887,GO:0005524	AT1G64550.1	ATGCN3,GCN3	general control non-repressible 3	K2
126	VIT_202s0025g02200	4.76667	1.04109	0.665319	2.37685	2.44022	2.36933	1.37903	2.52633	38046675	VIT_202s0025g02200.1	VIT_202s0025g02200.1	PF13489,PF09243	PTHR21320,PTHR21320:SF0	KOG2539			GO:0008168,GO:0006412,GO:0005507	AT1G64600.1		methyltransferases;copper ion binding	K2
127	VIT_202s0025g02410	2.5448	0	0.403398	0.240904	1.36144	0.0779953	0.105726	0.744826	38045878	VIT_202s0025g02410.1	VIT_202s0025g02410.1	PF02298	PTHR33021,PTHR33021:SF44				GO:0009055	AT1G64640.1	AtENODL8,ENODL8	early nodulin-like protein 8	K2
128	VIT_202s0025g02440	21.0655	18.4266	19.9224	16.5992	15.0263	15.7141	17.2828	18.9762	38046907	VIT_202s0025g02440.1	VIT_202s0025g02440.1	PF03690	PTHR11215,PTHR11215:SF3					AT5G41970.1		Metal-dependent protein hydrolase	K2
129	VIT_202s0025g02520	35.3269	35.3154	25.534	35.1649	25.7697	31.6445	31.083	32.816	38045025	VIT_202s0025g02520.1	VIT_202s0025g02520.1	PF06552			2.4.1.255			AT5G41950.1		Tetratricopeptide repeat (TPR)-like superfamily protein	K2
130	VIT_202s0025g02990	122.082	83.735	89.7039	87.6161	98.721	115.66	76.4438	103.461	38045165	VIT_202s0025g02990.1	VIT_202s0025g02990.1	PF02953	PTHR19338	KOG3480,KOG3489		K17781		AT1G61570.1	TIM13	translocase of the inner mitochondrial membrane 13	K2
131	VIT_202s0025g03440	0.994709	0	0.19272	0.415641	0.55001	0.177849	0.156211	0.0302413	38046510	VIT_202s0025g03440.1	VIT_202s0025g03440.1	PF14226,PF03171	PTHR10209,PTHR10209:SF212	KOG0143	1.14.11.15		GO:0055114,GO:0016491	AT4G23340.1		2-oxoglutarate (2OG) and Fe(II)-dependent oxygenase superfamily protein	K2
132	VIT_202s0025g03490	4.9916	2.31471	2.34299	3.09311	2.38675	3.17635	2.65028	2.207	38046508	VIT_202s0025g03490.1	VIT_202s0025g03490.1	PF00153	PTHR24089,PTHR24089:SF164	KOG0768				AT4G11440.1		Mitochondrial substrate carrier family protein	K2
133	VIT_202s0025g03690	16.3628	10.3265	12.5326	17.9611	12.2031	12.8358	13.3833	12.8941	38046786	VIT_202s0025g03690.1	VIT_202s0025g03690.1	PF08772	PTHR12814,PTHR12814:SF2	KOG2463		K11883		AT5G41190.1			K2
134	VIT_202s0025g04700	3.82465	0	0	0	1.25944	1.8603	1.66568	1.25911	38045808	VIT_202s0025g04700.1	VIT_202s0025g04700.1	PF01357,PF03330	PTHR31867,PTHR31867:SF2					AT1G12560.1	ATEXP7,ATEXPA7,ATHEXP ALPHA 1.26,EXP7,EXPA7	expansin A7	K2
135	VIT_202s0025g04830	122.53	60.3385	59.3372	68.3044	86.2385	92.8119	80.0337	68.5116	38046292	VIT_202s0025g04830.1	VIT_202s0025g04830.1	PF00403,PF00080	PTHR10003,PTHR10003:SF27	KOG4656		K04569	GO:0046872,GO:0030001,GO:0055114,GO:0006801,GO:0016532,GO:0005507	AT1G12520.1	ATCCS,CCS	copper chaperone for SOD1	K2
136	VIT_202s0033g00305	0.272752	0	0	0.0151003	0.249203	0.4376	0.1808	0.013212	38046199	VIT_202s0033g00305.1	VIT_202s0033g00305.1	PF14392,PF13966,PF14111	PTHR33033					AT4G29090.1		Ribonuclease H-like superfamily protein	K2
137	VIT_202s0033g00960	7.55313	2.77313	3.8119	5.46373	3.57795	4.94571	4.36461	3.74512	38046366	VIT_202s0033g00960.1	VIT_202s0033g00960.1	PF07967	PTHR15835,PTHR15835:SF2	KOG4765			GO:0008270,GO:0005634	AT1G48950.1		C3HC zinc finger-like	K2
138	VIT_202s0033g01000	856.058	192.748	99.8213	111.391	1242.53	780.732	581.703	669.041	38045178	VIT_202s0033g01000.1	VIT_202s0033g01000.1	PF02458	PTHR31642,PTHR31642:SF36		2.3.1.232,2.3.1.196		GO:0016747	AT5G17540.1		HXXXD-type acyl-transferase family protein	K2
139	VIT_202s0033g01190	18.7283	5.75803	8.28537	9.56837	9.70302	12.3468	10.426	11.5031	38046129	VIT_202s0033g01190.1	VIT_202s0033g01190.1		PTHR36779					AT4G19140.1			K2
140	VIT_202s0087g00090	12.0768	2.68399	4.747	8.78691	10.3687	8.6877	11.0796	7.3075	38045249	VIT_202s0087g00090.1	VIT_202s0087g00090.1		PTHR24412,PTHR24412:SF217					AT1G31350.1	KUF1	KAR-UP F-box 1	K2
141	VIT_202s0087g00170	37.4244	13.1613	14.2489	23.0295	33.2189	24.9565	22.8064	30.2374	38046776	VIT_202s0087g00170.1	VIT_202s0087g00170.1	PF08263,PF00069	PTHR27000,PTHR27000:SF202	KOG1187	2.7.11.1		GO:0006468,GO:0005524,GO:0004672	AT1G31420.2	FEI1	Leucine-rich repeat protein kinase family protein	K2
142	VIT_202s0087g00740	16.0976	12.3411	11.0003	13.5044	12.5674	11.0731	11.4172	11.3963	38044912	VIT_202s0087g00740.1	VIT_202s0087g00740.1	PF03407	PTHR10994,PTHR10994:SF69					AT2G35610.1	XEG113	xyloglucanase 113	K2
143	VIT_202s0109g00360	43.3137	28.9477	30.6459	44.0753	35.1191	39.7615	42.3008	36.9885	38045644	VIT_202s0109g00360.1	VIT_202s0109g00360.1	PF01926	PTHR10903		3.6.5.2		GO:0005525	AT5G05000.2	ATTOC34,OEP34,TOC34	translocon at the outer envelope membrane of chloroplasts 34	K2
144	VIT_202s0154g00610	46.7875	40.4261	35.6456	26.9058	34.1513	34.8457	33.6237	22.9444	38046274	VIT_202s0154g00610.1	VIT_202s0154g00610.1	PF04614	PTHR12774	KOG3133		K13337	GO:0005777	AT3G03490.1	AtPEX19-1,PEX19-1	peroxin 19-1	K2
145	VIT_202s0241g00080	341.97	199.613	195.916	282.737	552.95	366.208	287.348	273.848	38045912	VIT_202s0241g00080.1	VIT_202s0241g00080.1	PF10248	PTHR13105,PTHR13105:SF7			K15622		AT4G22740.2		glycine-rich protein	K2
146	VIT_202s0241g00120	1.21904	0.28316	0.552188	0.441766	0.889629	0.653031	0.56012	0.375076	38046055	VIT_202s0241g00120.1	VIT_202s0241g00120.1	PF08263,PF13855,PF00069	PTHR27006,PTHR27006:SF43	KOG1187	2.7.11.1		GO:0005515,GO:0006468,GO:0005524,GO:0004672	AT4G22730.1		Leucine-rich repeat protein kinase family protein	K2
147	VIT_203s0017g01340	46.5254	41.1779	39.9934	40.5579	31.3171	35.4096	30.1962	35.9245	38034278	VIT_203s0017g01340.1	VIT_203s0017g01340.1	PF00076	PTHR24012,PTHR24012:SF493	KOG0131,KOG0145,KOG0148			GO:0003676	AT2G44710.1		RNA-binding (RRM/RBD/RNP motifs) family protein	K2
148	VIT_203s0017g01350	108.264	87.226	76.4931	85.1432	83.7385	81.4506	85.1423	87.447	38034811	VIT_203s0017g01350.1	VIT_203s0017g01350.1	PF01092	PTHR11502,PTHR11502:SF10	KOG1646		K02991	GO:0006412,GO:0005840,GO:0005622,GO:0003735	AT5G10360.1	EMB3010,RPS6B	Ribosomal protein S6e	K2
149	VIT_203s0017g02330	56.8561	28.0555	37.8265	44.5503	42.5683	38.923	38.2462	40.0106	38035184	VIT_203s0017g02330.1	VIT_203s0017g02330.1	PF01218	PTHR10755,PTHR10755:SF7		1.3.3.3	K00228	GO:0055114,GO:0006779,GO:0004109	AT1G03475.1	ATCPO-I,HEMF1,LIN2	Coproporphyrinogen III oxidase	K2
150	VIT_203s0017g02350	15.4811	14.8007	11.825	12.0372	10.9352	14.3667	13.9985	11.2433	38035287	VIT_203s0017g02350.1	VIT_203s0017g02350.1	PF14226,PF03171	PTHR10209,PTHR10209:SF226	KOG0143	1.14.11.19		GO:0055114,GO:0016491	AT4G16330.2		2-oxoglutarate (2OG) and Fe(II)-dependent oxygenase superfamily protein	K2
151	VIT_203s0038g00110	15.1131	10.3805	13.0156	14.059	12.4713	16.0849	13.4958	15.8921	38034270	VIT_203s0038g00110.1	VIT_203s0038g00110.1	PF00076	PTHR24012,PTHR24012:SF411	KOG0127		K14573	GO:0003676	AT2G21440.1		RNA-binding (RRM/RBD/RNP motifs) family protein	K2
152	VIT_203s0038g00360	50.1643	10.1325	7.76295	13.6322	38.6859	16.7671	6.46051	10.7842	38055327	VIT_203s0038g00360.1	VIT_203s0038g00360.1	PF00857	PTHR11080,PTHR11080:SF24	KOG4003	3.5.1.19		GO:0008152,GO:0003824	AT2G22570.1	ATNIC1,NIC1	nicotinamidase 1	K2
153	VIT_203s0038g00400	34.6088	11.0683	15.3389	19.5403	20.6991	18.5609	11.4766	17.1476	38035392	VIT_203s0038g00400.1	VIT_203s0038g00400.1	PF01985	PTHR31846,PTHR31846:SF14				GO:0003723	AT2G21350.1		RNA-binding CRS1 / YhbY (CRM) domain protein	K2
154	VIT_203s0038g00620	60.6067	43.3436	57.6983	68.3423	53.8135	63.8569	53.9003	56.4755	38036079	VIT_203s0038g00620.1	VIT_203s0038g00620.1	PF14392,PF00098	PTHR23002,PTHR23002:SF65	KOG4400		K09250	GO:0008270,GO:0003676	AT1G75560.1		zinc knuckle (CCHC-type) family protein	K2
155	VIT_203s0038g00800	49.2795	46.244	42.4551	45.5322	39.6272	41.636	39.5703	33.3767	38034925	VIT_203s0038g00800.1	VIT_203s0038g00800.1	PF00248	PTHR11732,PTHR11732:SF209	KOG1577	1.1.1.224	K00011		AT2G21250.1		NAD(P)-linked oxidoreductase superfamily protein	K2
156	VIT_203s0038g01490	5.29864	2.50915	2.40795	4.38944	3.7542	4.72693	4.05739	5.24555	38034408	VIT_203s0038g01490.1	VIT_203s0038g01490.1	PF10441	PTHR15682					AT4G30150.1			K2
157	VIT_203s0038g01820	115.077	85.9526	75.7269	95.7257	102.033	94.3936	97.2837	123.988	38034466	VIT_203s0038g01820.1	VIT_203s0038g01820.1	PF03896	PTHR12924,PTHR12924:SF0	KOG1631		K13249	GO:0005789	AT2G16595.1		Translocon-associated protein (TRAP), alpha subunit	K2
158	VIT_203s0038g02920	14.2231	8.13863	10.3954	11.4212	8.90895	12.2564	9.80728	10.9576	38034999	VIT_203s0038g02920.1	VIT_203s0038g02920.1	PF08241,PF08498	PTHR10108,PTHR10108:SF858	KOG1269	2.1.1.143,2.1.1.142	K08242	GO:0008168,GO:0008152,GO:0006694	AT1G20330.1	CVP1,FRL1,SMT2	sterol methyltransferase 2	K2
159	VIT_203s0038g04010	35.8657	28.2135	28.4219	29.7317	29.511	29.2667	29.3316	32.6387	38034788	VIT_203s0038g04010.1	VIT_203s0038g04010.1	PF01937	PTHR12280,PTHR12280:SF31					AT4G35360.1		Uncharacterised conserved protein (UCP030210)	K2
160	VIT_203s0038g04320	36.7454	39.691	38.6446	46.2845	33.5613	40.3588	44.5417	42.6348	38034747	VIT_203s0038g04320.1	VIT_203s0038g04320.1	PF10585,PF14732,PF00899	PTHR10953,PTHR10953:SF5			K10685	GO:0008641	AT2G21470.1	ATSAE2,EMB2764,SAE2	SUMO-activating enzyme 2	K2
161	VIT_203s0038g04360	29.5247	22.3358	29.9176	30.5354	25.7179	27.4713	27.2218	19.0708	38034618	VIT_203s0038g04360.1	VIT_203s0038g04360.1	PF01398	PTHR10410,PTHR10410:SF6		3.4.25.1	K09613	GO:0005515	AT1G71230.1	AJH2,CSN5,CSN5B	COP9-signalosome 5B	K2
162	VIT_203s0038g04490	61.6344	48.8889	48.4727	55.9203	46.1256	45.1154	44.9404	38.0559	38034371	VIT_203s0038g04490.1	VIT_203s0038g04490.1	PF01168,PF00278	PTHR11482,PTHR11482:SF5	KOG0622	4.1.1.20	K01586	GO:0003824	AT5G11880.1		Pyridoxal-dependent decarboxylase family protein	K2
163	VIT_203s0063g00150	19.9404	8.4924	4.15453	4.63625	22.6941	20.8127	16.1987	14.7752	38034372	VIT_203s0063g00150.1	VIT_203s0063g00150.1	PF13359	PTHR22930,PTHR22930:SF49	KOG4585				AT3G55350.1		PIF / Ping-Pong family of plant transposases	K2
164	VIT_203s0063g00250	0.540532	0	0	0	0.333256	0.174046	0.106519	0.0105417	38035255	VIT_203s0063g00250.1	VIT_203s0063g00250.1	PF05922,PF00082	PTHR10795,PTHR10795:SF425		3.4.14.10		GO:0006508,GO:0004252	AT5G67360.1	ARA12	Subtilase family protein	K2
165	VIT_203s0063g00680	209.254	67.7716	67.2382	156.998	189.291	179.628	133.554	193.517	38035732	VIT_203s0063g00680.1	VIT_203s0063g00680.1	PF00675,PF05193,PF08367	PTHR11851,PTHR11851:SF68			K06972	GO:0006508	AT1G49630.1	ATPREP2,PREP2	presequence protease 2	K2
166	VIT_203s0063g01080	58.7962	27.4676	39.6672	50.0579	45.8465	39.7723	37.8658	46.3335	38034879	VIT_203s0063g01080.1	VIT_203s0063g01080.1	PF00069	PTHR24343,PTHR24343:SF162	KOG0583	2.7.11.1	K14498	GO:0006468,GO:0005524,GO:0004672	AT4G33950.1	ATOST1,OST1,P44,SNRK2-6,SNRK2.6,SRK2E	Protein kinase superfamily protein	K2
167	VIT_203s0063g01870	65.1583	36.4577	45.828	41.8579	39.0775	49.4679	33.0148	40.7504	38035556	VIT_203s0063g01870.1	VIT_203s0063g01870.1	PF05562	PTHR33596,PTHR33596:SF2					AT3G50830.1	ATCOR413-PM2,COR413-PM2	cold-regulated 413-plasma membrane 2	K2
168	VIT_203s0063g02450	56.5068	50.8678	48.6925	49.0978	49.0539	46.6249	47.2357	50.9195	38035735	VIT_203s0063g02450.1	VIT_203s0063g02450.1	PF16381,PF08752,PF01602	PTHR10261,PTHR10261:SF5			K17267	GO:0030126,GO:0016192,GO:0006886,GO:0005198,GO:0030117	AT4G34450.1		coatomer gamma-2 subunit, putative / gamma-2 coat protein, putative / gamma-2 COP, putative	K2
169	VIT_203s0063g02560	30.2656	25.6872	23.8349	28.1459	22.1937	24.9301	26.1075	22.6628	38034491	VIT_203s0063g02560.1	VIT_203s0063g02560.1	PF01409	PTHR11538,PTHR11538:SF40		6.1.1.20	K01889	GO:0043039,GO:0005737,GO:0005524,GO:0004812,GO:0000049	AT4G39280.2		phenylalanyl-tRNA synthetase, putative / phenylalanine--tRNA ligase, putative	K2
170	VIT_203s0088g00380	71.0199	44.8015	42.3994	38.9229	56.6989	35.013	30.299	35.8644	38034368	VIT_203s0088g00380.1	VIT_203s0088g00380.1	PF03953,PF00091	PTHR11588,PTHR11588:SF101			K07374	GO:0003924,GO:0007017,GO:0005874	AT1G50010.1	TUA2	tubulin alpha-2 chain	K2
171	VIT_203s0088g00500	14.7556	10.0331	11.5693	16.3796	10.8242	10.8063	11.1529	9.07832	38035275	VIT_203s0088g00500.1	VIT_203s0088g00500.1	PF01336,PF02938,PF00152	PTHR22594,PTHR22594:SF5		6.1.1.12	K01876	GO:0003676,GO:0006418,GO:0005524,GO:0004812,GO:0000166,GO:0016874	AT4G33760.1		tRNA synthetase class II (D, K and N) family protein	K2
172	VIT_203s0088g01040	44.8977	34.0489	40.3401	47.051	38.6738	43.4826	38.1605	37.2693	38034627	VIT_203s0088g01040.1	VIT_203s0088g01040.1	PF00155	PTHR11751,PTHR11751:SF376	KOG0257	2.6.1.83	K10206	GO:0030170,GO:0009058	AT4G33680.1	AGD2	Pyridoxal phosphate (PLP)-dependent transferases superfamily protein	K2
173	VIT_203s0088g01290	31.3097	16.8804	26.1148	21.0715	25.7747	28.0372	19.6561	23.5836	38034452	VIT_203s0088g01290.1	VIT_203s0088g01290.1	PF00719	PTHR10286,PTHR10286:SF3		3.6.1.1	K01507	GO:0006796,GO:0005737,GO:0004427,GO:0000287	AT5G09650.1	AtPPa6,PPa6	pyrophosphorylase 6	K2
174	VIT_203s0091g00290	12.2422	8.0443	8.2326	11.8091	9.23578	13.0862	14.2577	11.5452	38035729	VIT_203s0091g00290.1	VIT_203s0091g00290.1	PF00628,PF00046	PTHR12628,PTHR12628:SF13	KOG0484			GO:0005515,GO:0003677	AT3G19510.1	HAT3.1	Homeodomain-like protein with RING/FYVE/PHD-type zinc finger domain	K2
175	VIT_203s0091g00520	19.9757	15.7557	14.9204	12.3862	13.5042	12.4252	12.0358	14.5836	38035075	VIT_203s0091g00520.1	VIT_203s0091g00520.1	PF13640	PTHR10869,PTHR10869:SF66		1.14.11.2		GO:0055114,GO:0016491	AT4G33910.1		2-oxoglutarate (2OG) and Fe(II)-dependent oxygenase superfamily protein	K2
176	VIT_203s0091g01290	25.8278	3.17758	4.37054	6.94648	9.60541	10.6381	8.054	4.05991	38034276	VIT_203s0091g01290.1	VIT_203s0091g01290.1	PF00450	PTHR11802,PTHR11802:SF29	KOG1282		K16296	GO:0006508,GO:0004185	AT3G10450.1	SCPL7	serine carboxypeptidase-like 7	K2
177	VIT_203s0097g00590	36.8583	18.1603	19.4035	27.2689	23.3018	25.4006	26.606	23.7205	38035127	VIT_203s0097g00590.1	VIT_203s0097g00590.1	PF01459	PTHR10802,PTHR10802:SF4	KOG3296		K11518	GO:0055085,GO:0005741	AT3G20000.1	TOM40	translocase of the outer mitochondrial membrane 40	K2
178	VIT_203s0180g00050	32.9581	28.0471	27.6981	25.5618	20.3724	24.5222	23.133	21.3121	38035252	VIT_203s0180g00050.1	VIT_203s0180g00050.1	PF01193,PF01000	PTHR11800,PTHR11800:SF2	KOG1522	2.7.7.6	K03011	GO:0046983,GO:0006351,GO:0003899	AT2G15430.1	NRPB3,NRPD3,NRPE3A,RBP36A,RPB35.5A	DNA-directed RNA polymerase family protein	K2
179	VIT_204s0008g00510	16.3163	9.21552	10.7999	16.7128	15.618	16.5141	16.7901	12.1546	38069297	VIT_204s0008g00510.1	VIT_204s0008g00510.1	PF04511	PTHR11009,PTHR11009:SF13	KOG0858		K13989		AT4G29330.1	DER1	DERLIN-1	K2
180	VIT_204s0008g00700	115.199	6.73568	14.3861	19.0102	80.4877	76.231	36.4383	9.23103	38069233	VIT_204s0008g00700.1	VIT_204s0008g00700.1										K2
181	VIT_204s0008g00790	128	59.9093	47.1373	65.2964	120.05	76.8023	61.9374	85.8403	38066767	VIT_204s0008g00790.1	VIT_204s0008g00790.1	PF01778	PTHR10544,PTHR10544:SF1	KOG3412		K02903	GO:0006412,GO:0005840,GO:0005622,GO:0003735	AT2G19730.2		Ribosomal L28e protein family	K2
182	VIT_204s0008g01110	1460.92	43.1067	21.5941	313.823	3338.98	1435.37	419.9	32.0107	38066487	VIT_204s0008g01110.1	VIT_204s0008g01110.1	PF00447	PTHR10015,PTHR10015:SF186	KOG0627		K09419	GO:0043565,GO:0006355,GO:0005634,GO:0003700	AT2G26150.1	ATHSFA2,HSFA2	heat shock transcription factor A2	K2
183	VIT_204s0008g01170	53.9534	42.1384	46.9662	54.6851	46.1987	46.8565	48.7962	47.5368	38066576	VIT_204s0008g01170.1	VIT_204s0008g01170.1	PF07728,PF01434	PTHR23076,PTHR23076:SF73			K08955	GO:0016887,GO:0005524,GO:0006508,GO:0004222	AT2G26140.1	ftsh4	FTSH protease 4	K2
184	VIT_204s0008g01410	62.9217	40.2216	31.4218	48.7716	40.4317	48.9904	43.4082	50.7785	38068388	VIT_204s0008g01410.1	VIT_204s0008g01410.1	PF00638	PTHR23138,PTHR23138:SF93	KOG0864		K15306	GO:0046907	AT5G58590.1	RANBP1	RAN binding protein 1	K2
185	VIT_204s0008g01480	9.90368	3.41368	4.8411	5.6075	6.01908	6.74076	4.31618	4.33774	38069081	VIT_204s0008g01480.1	VIT_204s0008g01480.1	PF01189	PTHR22807,PTHR22807:SF4	KOG2360	2.1.1.176	K15264	GO:0008168	AT5G26180.2		S-adenosyl-L-methionine-dependent methyltransferases superfamily protein	K2
186	VIT_204s0008g01690	34.8668	24.4007	21.5906	27.8945	24.9728	32.728	24.9834	21.6216	38067340	VIT_204s0008g01690.1	VIT_204s0008g01690.1	PF00795	PTHR23088,PTHR23088:SF20	KOG0806	3.5.1.3	K13566	GO:0016810,GO:0006807	AT5G12040.1		Nitrilase/cyanide hydratase and apolipoprotein N-acyltransferase family protein	K2
187	VIT_204s0008g01780	15.4376	12.3174	12.4895	16.6955	13.8244	15.1392	13.1832	10.2322	38068006	VIT_204s0008g01780.1	VIT_204s0008g01780.1	PF00098,PF08783	PTHR15439,PTHR15439:SF0			K10624	GO:0008270,GO:0003676,GO:0005634	AT5G47430.1		DWNN domain, a CCHC-type zinc finger	K2
188	VIT_204s0008g01910	2.91155	0.828504	0.456561	0.118623	2.09827	1.52925	0.808574	1.68936	38067800	VIT_204s0008g01910.1	VIT_204s0008g01910.1		PTHR34537,PTHR34537:SF1					AT1G02180.1		ferredoxin-related	K2
189	VIT_204s0008g02090	98.9203	38.2733	30.777	50.8236	113.951	81.6636	34.585	50.1936	38068766	VIT_204s0008g02090.1	VIT_204s0008g02090.1	PF04145,PF07911	PTHR12483,PTHR12483:SF39	KOG3386		K14686	GO:0035434,GO:0016021,GO:0005375	AT5G20650.1	COPT5	copper transporter 5	K2
190	VIT_204s0008g02120	8.37314	0.0808287	0.755289	0.637177	7.36048	5.97963	3.18134	1.74562	38069080	VIT_204s0008g02120.1	VIT_204s0008g02120.1	PF14432,PF01535,PF13041	PTHR24015,PTHR24015:SF577					AT4G33170.1		Tetratricopeptide repeat (TPR)-like superfamily protein	K2
191	VIT_204s0008g02700	10.1683	7.28216	6.32986	14.0398	6.99799	8.9276	9.82951	7.29992	38067056	VIT_204s0008g02700.1	VIT_204s0008g02700.1	PF02390	PTHR23417,PTHR23417:SF16	KOG3115	2.1.1.33	K03439	GO:0008176,GO:0006400	AT5G24840.1		tRNA (guanine-N-7) methyltransferase	K2
192	VIT_204s0008g02950	9.9086	1.63909	1.63717	4.83556	8.3675	5.48841	3.98991	5.8228	38068701	VIT_204s0008g02950.1	VIT_204s0008g02950.1	PF01396,PF13368,PF01751,PF01131	PTHR11390,PTHR11390:SF27		5.99.1.2		GO:0006265,GO:0005694,GO:0003916,GO:0003677,GO:0003917	AT4G31210.1		DNA topoisomerase, type IA, core	K2
193	VIT_204s0008g03010	46.3879	36.399	40.2526	46.3745	39.4795	43.2589	34.4329	35.3304	38068038	VIT_204s0008g03010.1	VIT_204s0008g03010.1	PF00152	PTHR22594,PTHR22594:SF33		6.1.1.12	K01876	GO:0006418,GO:0005524,GO:0004812,GO:0000166	AT4G31180.2		Class II aminoacyl-tRNA and biotin synthetases superfamily protein	K2
194	VIT_204s0008g03250	34.5059	20.3308	29.1748	25.9733	32.33	32.4818	25.7451	31.8444	38067240	VIT_204s0008g03250.1	VIT_204s0008g03250.1	PF00046,PF08670,PF01852	PTHR24326,PTHR24326:SF238			K09338	GO:0003677,GO:0008289	AT1G52150.1	ATHB-15,ATHB15,CNA,ICU4	Homeobox-leucine zipper family protein / lipid-binding START domain-containing protein	K2
195	VIT_204s0008g03600	91.7586	61.1175	64.6581	77.5192	65.6865	78.1214	79.0093	83.3802	38068135	VIT_204s0008g03600.1	VIT_204s0008g03600.1	PF14249	PTHR35309,PTHR35309:SF2		5.5.1.24		GO:0009976	AT4G32770.1	ATSDX1,VTE1	tocopherol cyclase, chloroplast / vitamin E deficient 1 (VTE1) / sucrose export defective 1 (SXD1)	K2
196	VIT_204s0008g03800	37.039	22.9494	24.2072	33.1475	30.7782	31.1666	28.0993	28.193	38068069	VIT_204s0008g03800.1	VIT_204s0008g03800.1	PF00076,PF08777,PF05383	PTHR22792,PTHR22792:SF64	KOG4213		K11090	GO:0003676,GO:0003723	AT4G32720.2	AtLa1,La1	La protein 1	K2
197	VIT_204s0008g03890	28.8287	5.7101	8.32854	15.3907	24.4491	12.5107	7.33161	6.46499	38067591	VIT_204s0008g03890.1	VIT_204s0008g03890.1	PF01926	PTHR11649,PTHR11649:SF49	KOG2486		K03978	GO:0005525	AT5G11480.1		P-loop containing nucleoside triphosphate hydrolases superfamily protein	K2
198	VIT_204s0008g04310	25.787	17.2142	17.2701	25.5424	17.6945	21.4653	20.2557	13.1589	38068192	VIT_204s0008g04310.1	VIT_204s0008g04310.1	PF01789	PTHR31407,PTHR31407:SF7		1.10.3.9		GO:0019898,GO:0015979,GO:0009654,GO:0009523,GO:0005509	AT5G11450.1		Mog1/PsbP/DUF1795-like photosystem II reaction center PsbP family protein	K2
199	VIT_204s0008g04740	18.3656	8.80222	10.769	16.4974	11.5815	21.2269	17.9591	13.657	38067602	VIT_204s0008g04740.1	VIT_204s0008g04740.1	PF00583	PTHR23091,PTHR23091:SF46	KOG3138	2.3.1.88		GO:0008080	AT5G11340.1		Acyl-CoA N-acyltransferases (NAT) superfamily protein	K2
200	VIT_204s0008g05000	314.472	229.855	178.791	265.46	346.525	294.265	225.74	289.984	38067840	VIT_204s0008g05000.1	VIT_204s0008g05000.1	PF02271	PTHR12022	KOG3440			GO:0006122,GO:0005750	AT5G25450.1		Cytochrome bd ubiquinol oxidase, 14kDa subunit	K2
201	VIT_204s0008g05050	2.79179	0.440484	0.754273	2.43811	1.4137	1.65194	1.20779	0.840977	38067793	VIT_204s0008g05050.1	VIT_204s0008g05050.1	PF01535,PF13041	PTHR24015,PTHR24015:SF306					AT3G54980.1		Pentatricopeptide repeat (PPR) superfamily protein	K2
202	VIT_204s0008g05070	5.66824	2.24787	2.74639	5.7362	4.6391	4.13356	3.82757	4.41153	38067928	VIT_204s0008g05070.1	VIT_204s0008g05070.1	PF01535,PF14432	PTHR24015,PTHR24015:SF583					AT2G25580.1		Tetratricopeptide repeat (TPR)-like superfamily protein	K2
203	VIT_204s0008g05220	98.8512	59.7685	68.671	68.3968	61.7943	63.6927	57.6918	65.5355	38068190	VIT_204s0008g05220.1	VIT_204s0008g05220.1	PF13632,PF14569	PTHR13301,PTHR13301:SF33		2.4.1.12	K10999		AT4G32410.1	AtCESA1,CESA1,RSW1	cellulose synthase 1	K2
204	VIT_204s0008g05860	17.2285	7.64205	13.3047	17.1952	14.6829	7.97234	6.5335	11.7617	38067072	VIT_204s0008g05860.1	VIT_204s0008g05860.1		PTHR33167,PTHR33167:SF7					AT1G13940.1		Plant protein of unknown function (DUF863)	K2
205	VIT_204s0008g06040	70.6379	69.6237	59.4749	75.1216	71.2832	64.4435	58.5327	63.7358	38069090	VIT_204s0008g06040.1	VIT_204s0008g06040.1	PF00155	PTHR11879,PTHR11879:SF1		2.6.1.1	K00811	GO:0030170,GO:0009058,GO:0008483,GO:0006520	AT4G31990.2	AAT3,ASP5,ATAAT1	aspartate aminotransferase 5	K2
206	VIT_204s0008g06220	273.942	191.766	193.549	234.444	260.737	221.113	211.668	215.186	38067620	VIT_204s0008g06220.1	VIT_204s0008g06220.1	PF00366,PF16205	PTHR10744,PTHR10744:SF10	KOG1728		K02949	GO:0006412,GO:0005840,GO:0005622,GO:0003735	AT3G48930.1	EMB1080	Nucleic acid-binding, OB-fold-like protein	K2
207	VIT_204s0008g06610	7.86216	4.06426	4.49932	6.0579	7.37144	7.02324	6.29182	6.4204	38067296	VIT_204s0008g06610.1	VIT_204s0008g06610.1	PF00378	PTHR11941,PTHR11941:SF96		3.1.2.4	K05605	GO:0008152,GO:0003824	AT4G31810.1		ATP-dependent caseinolytic (Clp) protease/crotonase family protein	K2
208	VIT_204s0008g07070	70.4115	59.9566	71.2879	76.2355	59.6511	66.9543	67.95	61.6718	38066666	VIT_204s0008g07070.1	VIT_204s0008g07070.1	PF00076,PF08662	PTHR14068,PTHR14068:SF0			K03253	GO:0003676,GO:0031369,GO:0006413,GO:0005852,GO:0003743,GO:0003723	AT5G27640.1	ATEIF3B-1,ATTIF3B1,EIF3B,EIF3B-1,TIF3B1	translation initiation factor 3B1	K2
209	VIT_204s0023g00680	11.1604	8.44311	8.65303	8.27315	9.63952	10.7133	8.66748	6.24128	38066616	VIT_204s0023g00680.1	VIT_204s0023g00680.1	PF00383,PF08719,PF01872	PTHR11079,PTHR11079:SF76	KOG1018		K11752	GO:0008270,GO:0055114,GO:0009231,GO:0008703	AT3G47390.2	PHS1	cytidine/deoxycytidylate deaminase family protein	K2
210	VIT_204s0023g00690	225.237	115.868	83.7866	83.6265	251.264	257.4	179.585	190.57	38066513	VIT_204s0023g00690.1	VIT_204s0023g00690.1	PF00481	PTHR13832,PTHR13832:SF286	KOG0698	3.1.3.16		GO:0003824,GO:0006470,GO:0004722	AT3G02750.2		Protein phosphatase 2C family protein	K2
211	VIT_204s0023g00760	20.4205	7.01166	11.0679	17.9487	14.1803	13.9843	18.5967	11.7777	38069201	VIT_204s0023g00760.1	VIT_204s0023g00760.1	PF00364	PTHR23151,PTHR23151:SF66		6.4.1.2	K02160		AT5G16390.1	BCCP,BCCP-1,BCCP1,CAC1,CAC1-A,CAC1A	chloroplastic acetylcoenzyme A carboxylase 1	K2
212	VIT_204s0023g00820	58.7514	47.8772	44.0758	47.2084	44.5548	50.8508	50.6643	51.432	38069185	VIT_204s0023g00820.1	VIT_204s0023g00820.1		PTHR21397,PTHR21397:SF4	KOG4827				AT1G65270.2			K2
213	VIT_204s0023g01830	10.0123	8.10908	8.2133	10.3296	7.60849	7.87142	9.52069	7.15068	38067553	VIT_204s0023g01830.1	VIT_204s0023g01830.1	PF03813	PTHR17972			K14544		AT1G63810.1			K2
214	VIT_204s0023g01980	1.03635	0	0	0	0.836663	1.65794	0.336537	0.138759	38067600	VIT_204s0023g01980.1	VIT_204s0023g01980.1	PF00804	PTHR19957,PTHR19957:SF123	KOG0810		K08486,K02201	GO:0016020	AT2G18260.1	ATSYP112,SYP112	syntaxin of plants 112	K2
215	VIT_204s0023g02590	18.5679	10.9575	10.3733	14.6984	11.1214	14.765	12.8292	7.75138	38066380	VIT_204s0023g02590.1	VIT_204s0023g02590.1	PF16320,PF00542	PTHR24089,PTHR24089:SF321	KOG1715		K02935	GO:0006412,GO:0003735	AT4G36420.1		Ribosomal protein L12 family protein	K2
216	VIT_204s0023g02700	451.228	170.645	265.562	202.239	331.311	359.69	273.488	299.682	38067457	VIT_204s0023g02700.1	VIT_204s0023g02700.1	PF00085	PTHR10438,PTHR10438:SF274	KOG0907	1.6.5.4	K03671	GO:0045454,GO:0015035,GO:0006662	AT3G51030.1	ATTRX H1,ATTRX1,TRX1	thioredoxin H-type 1	K2
217	VIT_204s0043g00400	35.3508	22.0408	31.1291	24.8493	22.1552	28.3872	27.2312	28.9056	38066654	VIT_204s0043g00400.1	VIT_204s0043g00400.1	PF14382,PF10447	PTHR12686,PTHR12686:SF8	KOG3409			GO:0003723,GO:0000178	AT5G38890.1		Nucleic acid-binding, OB-fold-like protein	K2
218	VIT_204s0043g00440	90.7981	78.7739	81.9786	77.9059	78.4051	73.6998	70.3545	57.2878	38069247	VIT_204s0043g00440.1	VIT_204s0043g00440.1	PF00177	PTHR11205,PTHR11205:SF24	KOG3291		K02989	GO:0006412	AT2G37270.2	ATRPS5B,RPS5B	ribosomal protein 5B	K2
219	VIT_204s0043g00700	29.081	19.964	24.2054	26.5809	26.1454	20.711	23.8883	27.9471	38069242	VIT_204s0043g00700.1	VIT_204s0043g00700.1	PF02037,PF13812	PTHR31407,PTHR31407:SF5					AT3G04260.1	PTAC3	plastid transcriptionally active 3	K2
220	VIT_204s0043g00710	14.624	5.621	4.64241	7.17611	12.8392	10.2778	9.42811	8.81302	38068511	VIT_204s0043g00710.1	VIT_204s0043g00710.1	PF00012	PTHR19375,PTHR19375:SF90	KOG0103				AT4G16660.1		heat shock protein 70 (Hsp 70) family protein	K2
221	VIT_204s0043g00720	33.4311	22.5455	23.9676	22.4007	28.7593	23.4499	23.0377	30.8291	38067943	VIT_204s0043g00720.1	VIT_204s0043g00720.1	PF02780,PF02779	PTHR11624,PTHR11624:SF76		1.2.4.1	K00162	GO:0008152,GO:0003824	AT2G34590.1		Transketolase family protein	K2
222	VIT_204s0043g00820	6.58236	0	0	0.118393	7.12084	5.24896	4.603	1.99182	38068487	VIT_204s0043g00820.1	VIT_204s0043g00820.1	PF00804	PTHR19957,PTHR19957:SF123	KOG0810		K02201,K08486	GO:0016020	AT2G18260.1	ATSYP112,SYP112	syntaxin of plants 112	K2
223	VIT_204s0044g00640	1.10009	0.43476	0.397437	0.248561	0.763818	0.84312	0.591268	0.773128	38067946	VIT_204s0044g00640.1	VIT_204s0044g00640.1	PF00954,PF01453,PF07714	PTHR27002,PTHR27002:SF110	KOG1187	2.7.11.1		GO:0048544,GO:0006468,GO:0004672	AT5G60900.1	RLK1	receptor-like protein kinase 1	K2
224	VIT_204s0044g00890	25.0056	5.07499	4.61673	10.4072	15.9519	12.9466	10.6525	12.1286	38066684	VIT_204s0044g00890.1	VIT_204s0044g00890.1	PF00696	PTHR21499,PTHR21499:SF23		2.7.4.22	K09903	GO:0009041,GO:0006221	AT3G18680.1		Amino acid kinase family protein	K2
225	VIT_204s0044g01280	4.65207	2.38386	2.78548	3.31804	3.30686	2.52172	2.76988	2.24123	38068295	VIT_204s0044g01280.1	VIT_204s0044g01280.1	PF02364	PTHR12741		2.4.1.34		GO:0016020,GO:0006075,GO:0003843,GO:0000148	AT2G13680.1	ATGSL02,CALS5,GLS2	callose synthase 5	K2
226	VIT_204s0079g00530	79.5354	59.7517	57.3562	53.4724	79.7693	64.6413	38.3143	40.0517	38069058	VIT_204s0079g00530.1	VIT_204s0079g00530.1	PF00180	PTHR11822		1.1.1.42	K00031	GO:0055114,GO:0016616,GO:0006102,GO:0004450	AT1G65930.1	cICDH	cytosolic NADP+-dependent isocitrate dehydrogenase	K2
227	VIT_204s0079g00690	0.956347	0	0.115986	1.08247	0.75066	0.255786	0.745232	0.630495	38067707	VIT_204s0079g00690.1	VIT_204s0079g00690.1	PF00043,PF02798	PTHR11260,PTHR11260:SF186	KOG0867	2.5.1.18	K00799	GO:0005515	AT3G03190.1	ATGSTF11,ATGSTF6,GSTF11	glutathione S-transferase F11	K2
228	VIT_205s0020g00810	17.6063	7.96837	8.4128	13.3966	11.311	14.5932	10.1302	8.76768	38074339	VIT_205s0020g00810.1	VIT_205s0020g00810.1	PF00297	PTHR11229	KOG3141		K02906	GO:0006412,GO:0005840,GO:0005622,GO:0003735	AT3G17465.1	RPL3P	ribosomal protein L3 plastid	K2
229	VIT_205s0020g01110	2.94708	0.149232	1.54705	1.88669	1.90366	2.06855	1.80952	1.11714	38073716	VIT_205s0020g01110.1	VIT_205s0020g01110.1	PF03283	PTHR21562,PTHR21562:SF5				GO:0016787	AT5G26670.1		Pectinacetylesterase family protein	K2
230	VIT_205s0020g01530	8.80703	3.29265	4.69753	2.40835	5.72706	6.88145	6.61204	4.87575	38073483	VIT_205s0020g01530.1	VIT_205s0020g01530.1	PF05637	PTHR31311,PTHR31311:SF6	KOG4748	2.4.2.39	K08238	GO:0016757,GO:0016021	AT4G02500.1	ATXT2,XT2,XXT2	UDP-xylosyltransferase 2	K2
231	VIT_205s0020g02400	10.0718	6.78537	7.92519	7.61506	6.40889	7.26173	7.03089	6.64934	38072480	VIT_205s0020g02400.1	VIT_205s0020g02400.1	PF12937,PF13516	PTHR24006,PTHR24006:SF435	KOG1947		K10268	GO:0005515	AT4G15475.1		F-box/RNI-like superfamily protein	K2
232	VIT_205s0020g02560	25.7023	12.4002	13.7484	27.799	15.989	19.7798	22.2845	21.9962	38073960	VIT_205s0020g02560.1	VIT_205s0020g02560.1	PF00268	PTHR23409,PTHR23409:SF24		1.17.4.2,1.17.4.1	K10808	GO:0055114,GO:0009186	AT3G23580.1	RNR2,RNR2A	ribonucleotide reductase 2A	K2
233	VIT_205s0020g02610	23.8428	19.7539	16.3692	22.6823	22.9909	25.1646	19.3327	20.1866	38074510	VIT_205s0020g02610.1	VIT_205s0020g02610.1	PF01595	PTHR12064,PTHR12064:SF32	KOG2118		K16302		AT4G14240.1		CBS domain-containing protein with a domain of unknown function (DUF21)	K2
234	VIT_205s0020g03020	38.4033	24.5376	29.929	29.8034	31.0829	32.7241	30.6006	27.6201	38074331	VIT_205s0020g03020.1	VIT_205s0020g03020.1	PF00651,PF00514	PTHR23315,PTHR23315:SF84				GO:0005515	AT5G19330.1	ARIA	ARM repeat protein interacting with ABF2	K2
235	VIT_205s0020g03460	19.6515	14.4676	18.6737	28.4768	17.5502	22.3868	20.8114	21.2037	38073838	VIT_205s0020g03460.1	VIT_205s0020g03460.1	PF03468	PTHR21596,PTHR21596:SF11				GO:0031047	AT3G22430.1			K2
236	VIT_205s0020g03530	3.0601	0.481134	0.25333	0	2.07955	1.89791	1.26171	1.94035	38074116	VIT_205s0020g03530.1	VIT_205s0020g03530.1	PF04927	PTHR31174,PTHR31174:SF7					AT3G22490.1		Seed maturation protein	K2
237	VIT_205s0020g04090	4.88014	0.106997	0	0.18412	2.14675	3.05049	1.9623	1.55464	38071803	VIT_205s0020g04090.1	VIT_205s0020g04090.1	PF00447	PTHR10015,PTHR10015:SF139	KOG0627		K09419	GO:0043565,GO:0006355,GO:0005634,GO:0003700,GO:0009408	AT3G22830.1	AT-HSFA6B,HSFA6B	heat shock transcription factor A6B	K2
238	VIT_205s0020g04630	24.024	2.73669	3.46581	9.28898	19.4089	11.1488	6.69799	14.2696	38073619	VIT_205s0020g04630.1	VIT_205s0020g04630.1	PF06241	PTHR31563,PTHR31563:SF2					AT5G43745.1		Protein of unknown function (DUF1012)	K2
239	VIT_205s0020g04740	20.298	16.1849	13.5985	11.2669	14.5398	14.1454	11.5564	14.2437	38072347	VIT_205s0020g04740.1	VIT_205s0020g04740.1	PF03208	PTHR19317,PTHR19317:SF13	KOG3142				AT1G04260.1	MPI7,MPIP7,PRA1.D	CAMV movement protein interacting protein 7	K2
240	VIT_205s0029g00440	37.7474	22.6871	18.5239	26.282	29.8031	30.0205	27.4308	29.8901	38072778	VIT_205s0029g00440.1	VIT_205s0029g00440.1	PF00076	PTHR24012				GO:0003676	AT4G13850.1	ATGRP2,GR-RBP2,GRP2	glycine-rich RNA-binding protein 2	K2
241	VIT_205s0029g00802	1.40792	0.442614	0.354067	2.53273	1.59605	1.89123	1.98871	1.66086	38073417	VIT_205s0029g00802.1	VIT_205s0029g00802.1	PF00275	PTHR21090,PTHR21090:SF21		2.5.1.19		GO:0016765	AT2G45300.1		RNA 3\'-terminal phosphate cyclase/enolpyruvate transferase, alpha/beta	K2
242	VIT_205s0029g01090	37.959	32.9446	33.5139	36.0382	28.1631	36.1911	34.5212	27.7732	38073189	VIT_205s0029g01090.1	VIT_205s0029g01090.1	PF13802,PF01055	PTHR22762,PTHR22762:SF54		3.2.1.84	K05546	GO:0005975,GO:0004553	AT5G63840.1	PSL5,RSW3	Glycosyl hydrolases family 31 protein	K2
243	VIT_205s0049g00140	252.139	113.455	130.197	153.667	254.629	250.258	222.943	164.721	38072277	VIT_205s0049g00140.1	VIT_205s0049g00140.1		PTHR33912,PTHR33912:SF2					AT4G14450.1			K2
244	VIT_205s0049g01350	2.56681	0.51449	0.424793	0.540725	1.11841	1.90249	1.58522	0.854782	38071977	VIT_205s0049g01350.1	VIT_205s0049g01350.1	PF00225	PTHR24115,PTHR24115:SF416	KOG0243	3.6.4.4	K10398	GO:0008017,GO:0007018,GO:0005524,GO:0003777,GO:0005871	AT4G14330.1		P-loop containing nucleoside triphosphate hydrolases superfamily protein	K2
245	VIT_205s0049g01770	60.7397	52.5538	42.5666	52.6638	56.625	49.8216	54.2859	50.306	38072919	VIT_205s0049g01770.1	VIT_205s0049g01770.1	PF01652	PTHR11960,PTHR11960:SF12	KOG1670		K03259	GO:0006413,GO:0005737,GO:0003743,GO:0003723	AT5G35620.1	EIF(ISO)4E,EIF4E2,eIFiso4E,LSP,LSP1	Eukaryotic initiation factor 4E protein	K2
246	VIT_205s0049g01940	19.8393	11.6916	11.5882	13.5609	11.8556	17.2617	17.2297	11.9269	38074037	VIT_205s0049g01940.1	VIT_205s0049g01940.1	PF00076,PF02136	PTHR10693,PTHR10693:SF29	KOG0116			GO:0003676,GO:0006810,GO:0005622	AT5G43960.1		Nuclear transport factor 2 (NTF2) family protein with RNA binding (RRM-RBD-RNP motifs) domain	K2
247	VIT_205s0049g01950	5.92818	2.80875	4.93556	4.96106	4.15798	3.95701	4.70652	3.46554	38072768	VIT_205s0049g01950.1	VIT_205s0049g01950.1	PF07720,PF07719	PTHR26312,PTHR26312:SF78		3.5.2.6			AT1G04530.1		Tetratricopeptide repeat (TPR)-like superfamily protein	K2
248	VIT_205s0051g00650	55.2474	51.1689	50.423	45.4052	40.7836	43.9019	42.4573	38.6676	38072350	VIT_205s0051g00650.1	VIT_205s0051g00650.1	PF00248	PTHR11732,PTHR11732:SF14	KOG1575				AT1G04690.1	KAB1,KV-BETA1	potassium channel beta subunit 1	K2
249	VIT_205s0062g00120	25.9252	13.4168	20.468	23.7715	22.3379	28.6704	22.2612	20.0751	38073150	VIT_205s0062g00120.1	VIT_205s0062g00120.1	PF01201	PTHR10394	KOG3283		K02995	GO:0006412,GO:0005840,GO:0005622,GO:0003735	AT5G59240.1		Ribosomal protein S8e family protein	K2
250	VIT_205s0062g00890	86.1342	64.3959	67.0067	67.6307	73.0485	64.2394	70.5726	66.0224	38072098	VIT_205s0062g00890.1	VIT_205s0062g00890.1	PF00686,PF01326	PTHR22931,PTHR22931:SF2		2.7.9.5	K15535	GO:2001070,GO:0016310,GO:0016301,GO:0005524	AT5G26570.1	ATGWD3,OK1,PWD	catalytics;carbohydrate kinases;phosphoglucan, water dikinases	K2
251	VIT_205s0062g01180	38.4755	26.672	28.2739	29.5253	35.2187	31.5786	31.6688	33.8983	38073295	VIT_205s0062g01180.1	VIT_205s0062g01180.1	PF08506,PF03810	PTHR10997,PTHR10997:SF35				GO:0006886,GO:0008536	AT2G31660.1	SAD2,URM9	ARM repeat superfamily protein	K2
252	VIT_205s0062g01220	16.0029	11.6005	9.10462	11.9657	13.4007	15.2014	12.7431	15.1473	38074063	VIT_205s0062g01220.1	VIT_205s0062g01220.1	PF03171	PTHR10869,PTHR10869:SF42	KOG1591	1.14.11.2	K00472	GO:0055114,GO:0016491	AT2G43080.1	AT-P4H-1	P4H isoform 1	K2
253	VIT_205s0077g00700	22.6757	8.67323	10.5884	20.678	15.6625	19.8824	15.0169	15.265	38072617	VIT_205s0077g00700.1	VIT_205s0077g00700.1	PF03029	PTHR21231,PTHR21231:SF8			K06883		AT4G21800.1	QQT2	P-loop containing nucleoside triphosphate hydrolases superfamily protein	K2
254	VIT_205s0077g00710	18.7071	8.87559	9.64438	17.0873	15.8092	14.9844	15.4789	19.0888	38074370	VIT_205s0077g00710.1	VIT_205s0077g00710.1	PF00397,PF00076	PTHR24012,PTHR24012:SF382	KOG0144		K13207	GO:0005515,GO:0003676	AT4G16280.2	FCA	RNA binding;abscisic acid binding	K2
255	VIT_205s0077g00820	21.3729	18.6126	16.3818	17.4143	17.2396	18.1421	19.8468	19.1023	38073533	VIT_205s0077g00820.1	VIT_205s0077g00820.1		PTHR31515,PTHR31515:SF0					AT4G16180.2			K2
256	VIT_205s0077g01000	9.34364	2.92695	4.74016	8.76574	8.46831	6.92109	7.34696	8.95244	38071950	VIT_205s0077g01000.1	VIT_205s0077g01000.1	PF05182	PTHR13484,PTHR13484:SF0			K14405		AT5G58040.1	ATFIP1[V],ATFIPS5,FIP1[V],FIPS5	homolog of yeast FIP1 [V]	K2
257	VIT_205s0077g01770	10.5771	2.00964	3.43427	9.25306	8.59952	8.31777	5.82266	6.62212	38074461	VIT_205s0077g01770.1	VIT_205s0077g01770.1	PF08144	PTHR13389	KOG2050		K14844	GO:0003723	AT3G16810.1	APUM24,PUM24	pumilio 24	K2
258	VIT_205s0077g01830	12.1819	10.0064	9.90546	13.6408	12.1309	13.665	13.0149	8.93293	38072939	VIT_205s0077g01830.1	VIT_205s0077g01830.1	PF13091,PF00614	PTHR18896,PTHR18896:SF64		3.1.4.4	K01115	GO:0003824	AT3G16785.1	PLD ZETA 1,PLDP1,PLDZ1,PLDZETA1	phospholipase D P1	K2
259	VIT_205s0077g01950	1.64397	0	0.139346	0	1.08313	0.514376	0.345604	0.616929	38072443	VIT_205s0077g01950.1	VIT_205s0077g01950.1	PF04043,PF01095	PTHR31707,PTHR31707:SF17		3.1.1.11	K01051	GO:0004857,GO:0042545,GO:0030599,GO:0005618	AT5G27870.1		Plant invertase/pectin methylesterase inhibitor superfamily	K2
260	VIT_205s0077g02070	115.028	122.896	84.0309	106.468	100.076	85.5785	87.8349	97.5657	38074192	VIT_205s0077g02070.1	VIT_205s0077g02070.1	PF00828	PTHR10934	KOG1714			GO:0006412,GO:0005840,GO:0005622,GO:0003735	AT3G05590.1	RPL18	ribosomal protein L18	K2
261	VIT_205s0094g00440	12.5073	6.35774	5.39676	8.02837	6.77858	9.55694	7.79061	8.44144	38072509	VIT_205s0094g00440.1	VIT_205s0094g00440.1	PF09368,PF04000	PTHR13237,PTHR13237:SF8	KOG3118		K14767		AT2G43650.1	EMB2777	Sas10/U3 ribonucleoprotein (Utp) family protein	K2
262	VIT_205s0094g00910	32.0028	22.2141	27.0945	26.348	26.0063	27.7119	25.9875	16.9599	38073784	VIT_205s0094g00910.1	VIT_205s0094g00910.1		PTHR36021,PTHR36021:SF1					AT3G59800.1			K2
263	VIT_205s0094g01110	64.3814	56.0816	58.3358	65.9501	67.2184	55.9256	55.1634	50.9992	38073949	VIT_205s0094g01110.1	VIT_205s0094g01110.1	PF01842,PF13710,PF10369	PTHR30239,PTHR30239:SF3	KOG2663	2.2.1.6	K01653	GO:0016597,GO:0008152	AT2G31810.1		ACT domain-containing small subunit of acetolactate synthase protein	K2
264	VIT_205s0094g01130	25.191	16.2663	18.9915	14.2916	14.2525	12.547	10.6385	12.074	38072860	VIT_205s0094g01130.1	VIT_205s0094g01130.1	PF00107,PF16884	PTHR11695,PTHR11695:SF564		1.1.1.54,1.3.1.74,1.3.1.102		GO:0055114,GO:0016491,GO:0008270	AT5G16990.1		Zinc-binding dehydrogenase family protein	K2
265	VIT_205s0094g01330	1.53493	0.136213	0.407508	0.413974	1.37483	1.27983	0.972124	1.0559	38072593	VIT_205s0094g01330.1	VIT_205s0094g01330.1	PF03372	PTHR11200,PTHR11200:SF133	KOG0565	3.1.3.56			AT2G43900.1		Endonuclease/exonuclease/phosphatase family protein	K2
266	VIT_205s0094g01480	28.2833	17.7233	17.4465	27.1595	25.1795	23.4638	19.8031	13.3603	38074212	VIT_205s0094g01480.1	VIT_205s0094g01480.1	PF01113,PF05173	PTHR20836,PTHR20836:SF0		1.17.1.8	K00215	GO:0055114,GO:0009089,GO:0008839	AT2G44040.1		Dihydrodipicolinate reductase, bacterial/plant	K2
267	VIT_205s0102g00070	17.8384	7.41838	10.4224	18.7856	12.0318	9.30213	8.1539	8.12673	38074183	VIT_205s0102g00070.1	VIT_205s0102g00070.1	PF13891	PTHR13453				GO:0000123	AT2G31600.1			K2
268	VIT_205s0102g00260	18.5735	16.0448	15.7681	19.7658	15.8231	17.3789	17.1434	15.7842	38072786	VIT_205s0102g00260.1	VIT_205s0102g00260.1	PF01695,PF00439	PTHR23069				GO:0005524,GO:0005515	AT1G05910.1		cell division cycle protein 48-related / CDC48-related	K2
269	VIT_205s0102g00270	14.2046	10.2685	11.7614	13.7693	11.4956	12.4977	13.1347	12.5326	38073437	VIT_205s0102g00270.1	VIT_205s0102g00270.1		PTHR12444,PTHR12444:SF2	KOG1877				AT1G05960.1		ARM repeat superfamily protein	K2
270	VIT_205s0102g00460	2.15036	0.333829	0.370827	1.12298	1.59411	0.815325	0.601127	0.76219	38074274	VIT_205s0102g00460.1	VIT_205s0102g00460.1	PF11955	PTHR31476,PTHR31476:SF16					AT1G71850.1		Ubiquitin carboxyl-terminal hydrolase family protein	K2
271	VIT_205s0102g00600	33.6266	0.624909	1.59054	8.05176	21.3867	21.4471	6.83142	3.10126	38072666	VIT_205s0102g00600.1	VIT_205s0102g00600.1										K2
272	VIT_205s0102g00620	113.505	2.97529	2.95792	30.5755	83.9245	77.488	20.1065	16.7064	38073418	VIT_205s0102g00620.1	VIT_205s0102g00620.1										K2
273	VIT_205s0102g01190	19.4759	13.3873	8.33981	14.6163	15.5462	16.2398	12.9695	14.2361	38072578	VIT_205s0102g01190.1	VIT_205s0102g01190.1	PF00262	PTHR11073,PTHR11073:SF6	KOG0674		K08057	GO:0051082,GO:0006457,GO:0005783,GO:0005509	AT1G08450.1	AtCRT3,CRT3,EBS2,PSL1	calreticulin 3	K2
274	VIT_205s0124g00030	45.1501	39.2391	40.1334	42.5361	34.7107	35.3663	34.3337	39.7897	38073048	VIT_205s0124g00030.1	VIT_205s0124g00030.1	PF07651	PTHR12276,PTHR12276:SF45	KOG2056		K12471	GO:0005543	AT2G43160.1		ENTH/VHS family protein	K2
275	VIT_205s0124g00230	2.35603	0.0519853	0.0503393	0	2.08784	1.45982	0.446546	0.546306	38072489	VIT_205s0124g00230.1	VIT_205s0124g00230.1	PF08268,PF00646	PTHR31790,PTHR31790:SF15				GO:0005515	AT3G16210.1		F-box family protein	K2
276	VIT_205s0124g00400	24.6054	14.8999	19.8736	20.881	23.0841	18.2361	18.2422	19.46	38072215	VIT_205s0124g00400.1	VIT_205s0124g00400.1	PF00682	PTHR10277,PTHR10277:SF9		2.3.3.13	K01649	GO:0003824	AT1G74040.1	IMS1,IPMS2,MAML-3	2-isopropylmalate synthase 1	K2
277	VIT_205s0124g00470	3.86663	1.92678	1.78835	3.00284	2.3357	2.56153	2.82835	3.14422	38073708	VIT_205s0124g00470.1	VIT_205s0124g00470.1	PF01535,PF12854,PF13041	PTHR24015,PTHR24015:SF430					AT1G06710.1		Tetratricopeptide repeat (TPR)-like superfamily protein	K2
278	VIT_206s0004g00170	57.4447	7.14252	11.6603	19.4056	53.3463	19.2939	8.46827	16.871	38061234	VIT_206s0004g00170.1	VIT_206s0004g00170.1	PF01029	PTHR11078				GO:0006355,GO:0003723,GO:0006353	AT4G26370.1		antitermination NusB domain-containing protein	K2
279	VIT_206s0004g00240	725.772	154.418	187.018	470.387	1067.51	604.449	373.457	379.828	38063715	VIT_206s0004g00240.1	VIT_206s0004g00240.1	PF00118	PTHR11353,PTHR11353:SF8			K04077	GO:0005524	AT3G13470.1		TCP-1/cpn60 chaperonin family protein	K2
280	VIT_206s0004g00360	155.695	119.584	140.49	133.344	138.275	131.158	123.872	133.668	38061921	VIT_206s0004g00360.1	VIT_206s0004g00360.1	PF14374,PF00573	PTHR19431	KOG1475		K02930	GO:0006412,GO:0005840,GO:0003735	AT3G09630.1		Ribosomal protein L4/L1 family	K2
281	VIT_206s0004g00480	167.604	67.9149	87.357	115.975	119.015	100.995	76.4373	98.6558	38063434	VIT_206s0004g00480.1	VIT_206s0004g00480.1	PF03953,PF00091	PTHR11588,PTHR11588:SF48			K07374	GO:0003924,GO:0007017,GO:0005874	AT5G19770.1	TUA3	tubulin alpha-3	K2
282	VIT_206s0004g00710	80.9533	33.5887	36.8101	59.7226	78.4259	69.9735	50.6339	33.3743	38061659	VIT_206s0004g00710.1	VIT_206s0004g00710.1	PF00076	PTHR23147,PTHR23147:SF6	KOG4207		K12900	GO:0003676	AT3G13570.1	SCL30A	SC35-like splicing factor 30A	K2
283	VIT_206s0004g01110	19.1487	10.2622	9.59958	13.6607	11.8164	13.9049	13.3731	10.7497	38061183	VIT_206s0004g01110.1	VIT_206s0004g01110.1	PF16916,PF01545	PTHR11562,PTHR11562:SF45	KOG1485			GO:0055085,GO:0016021,GO:0008324,GO:0006812	AT3G58060.1		Cation efflux family protein	K2
284	VIT_206s0004g01370	6.37011	3.80755	3.60894	2.93207	4.72677	5.24612	4.66625	2.36521	38062799	VIT_206s0004g01370.1	VIT_206s0004g01370.1	PF03099	PTHR10993,PTHR10993:SF7	KOG0325	2.3.1.181	K03801	GO:0006464	AT1G04640.1	LIP2	lipoyltransferase 2	K2
285	VIT_206s0004g01510	389.561	43.7072	83.3014	82.3734	755.689	401.532	59.6848	198.382	38061042	VIT_206s0004g01510.1	VIT_206s0004g01510.1	PF01477,PF00305	PTHR11771,PTHR11771:SF42		1.13.11.12	K00454	GO:0005515,GO:0055114,GO:0046872,GO:0016702	AT3G45140.1	ATLOX2,LOX2	lipoxygenase 2	K2
286	VIT_206s0004g02070	31.3186	18.6194	17.946	30.6918	26.5638	24.0429	24.1198	24.4958	38062765	VIT_206s0004g02070.1	VIT_206s0004g02070.1	PF01926,PF14714	PTHR11649,PTHR11649:SF60	KOG1191			GO:0005525	AT3G12080.1	emb2738	GTP-binding family protein	K2
287	VIT_206s0004g02100	12.1147	0.998802	2.81505	3.56091	6.12971	4.00164	2.15357	5.91909	38062977	VIT_206s0004g02100.1	VIT_206s0004g02100.1	PF05241	PTHR14207,PTHR14207:SF0	KOG4826		K01824	GO:0047750,GO:0016125,GO:0016021	AT1G20050.1	HYD1	C-8,7 sterol isomerase	K2
288	VIT_206s0004g02390	30.2166	10.5406	16.0254	23.1662	34.5022	37.9417	12.5555	3.82059	38062092	VIT_206s0004g02390.1	VIT_206s0004g02390.1	PF01764	PTHR31403,PTHR31403:SF6	KOG4569	3.1.1.32,3.1.1.26,3.1.1.3		GO:0006629	AT1G51440.1		alpha/beta-Hydrolases superfamily protein	K2
289	VIT_206s0004g02700	12.2951	6.82522	8.40204	8.66111	6.52171	8.78968	8.35955	7.74493	38063576	VIT_206s0004g02700.1	VIT_206s0004g02700.1	PF05212	PTHR31210,PTHR31210:SF13					AT2G28310.1		Protein of unknown function (DUF707)	K2
290	VIT_206s0004g03430	15.6033	11.3306	10.3131	8.32638	8.9746	11.0584	8.25531	7.91463	38061493	VIT_206s0004g03430.1	VIT_206s0004g03430.1	PF00800	PTHR21022,PTHR21022:SF1	KOG2797	4.2.1.91,4.2.1.51	K05359	GO:0009094,GO:0004664	AT3G07630.1	ADT2	arogenate dehydratase 2	K2
291	VIT_206s0004g03680	1.41969	0	0	0.0684167	1.14897	1.07722	0.816976	0.38003	38062959	VIT_206s0004g03680.1	VIT_206s0004g03680.1	PF02434	PTHR10811,PTHR10811:SF27	KOG2246	2.4.1.122		GO:0016757,GO:0016020	AT1G07850.1		Protein of unknown function (DUF604)	K2
292	VIT_206s0004g04060	14.426	7.48942	11.2717	10.343	14.3848	16.023	9.5748	14.8636	38061000	VIT_206s0004g04060.1	VIT_206s0004g04060.1	PF00190	PTHR31189,PTHR31189:SF8				GO:0045735	AT2G28680.1		RmlC-like cupins superfamily protein	K2
293	VIT_206s0004g04130	20.2877	5.73978	10.9648	12.1377	15.3074	10.9525	10.532	12.4905	38063586	VIT_206s0004g04130.1	VIT_206s0004g04130.1	PF04387	PTHR11035	KOG3187	4.2.1.134			AT5G59770.1		Protein-tyrosine phosphatase-like, PTPLA	K2
294	VIT_206s0004g04870	32.8976	17.0764	25.5641	32.7704	31.9526	31.595	30.5562	15.6473	38061438	VIT_206s0004g04870.1	VIT_206s0004g04870.1	PF10539	PTHR10857,PTHR10857:SF40					AT2G32910.1		DCD (Development and Cell Death) domain protein	K2
295	VIT_206s0004g04890	22.1724	16.4042	13.0842	13.4544	14.6133	19.4923	20.9515	9.40381	38062793	VIT_206s0004g04890.1	VIT_206s0004g04890.1	PF01694	PTHR22936,PTHR22936:SF25	KOG2289			GO:0016021,GO:0004252,GO:0006508	AT2G29050.1	ATRBL1,RBL1	RHOMBOID-like 1	K2
296	VIT_206s0004g04910	48.017	22.6471	34.7858	40.6293	63.5282	45.7808	31.5668	20.1393	38062576	VIT_206s0004g04910.1	VIT_206s0004g04910.1		PTHR31032,PTHR31032:SF2					AT5G59400.1			K2
297	VIT_206s0004g05040	7.47641	3.57142	4.60534	5.0048	4.97027	4.15019	4.2222	3.25498	38061194	VIT_206s0004g05040.1	VIT_206s0004g05040.1	PF04191	PTHR12714,PTHR12714:SF11	KOG2628	2.1.1.100			AT5G59500.1		protein C-terminal S-isoprenylcysteine carboxyl O-methyltransferases	K2
298	VIT_206s0004g05070	57.9192	34.1705	23.9098	50.9754	50.1817	58.1956	24.673	21.4775	38062932	VIT_206s0004g05070.1	VIT_206s0004g05070.1	PF02535	PTHR11040,PTHR11040:SF23	KOG1558		K14709	GO:0055085,GO:0046873,GO:0030001,GO:0016020	AT5G59520.1	ZIP2	ZRT/IRT-like protein 2	K2
299	VIT_206s0004g05150	40.7674	11.5817	13.6412	32.1023	25.2837	28.6095	21.9926	18.1251	38060984	VIT_206s0004g05150.1	VIT_206s0004g05150.1	PF01103	PTHR12815,PTHR12815:SF18				GO:0019867	AT3G46740.1	MAR1,TOC75-III	translocon at the outer envelope membrane of chloroplasts 75-III	K2
300	VIT_206s0004g05460	87.0169	42.6456	25.1771	30.1949	59.2866	69.1236	19.3065	23.2114	38063575	VIT_206s0004g05460.1	VIT_206s0004g05460.1	PF00481	PTHR13832,PTHR13832:SF219		3.1.3.16		GO:0003824,GO:0006470,GO:0004722	AT1G07430.1	HAI2	highly ABA-induced PP2C gene 2	K2
301	VIT_206s0004g05500	3.78774	0.92948	1.16978	2.18399	1.62402	1.42718	1.51405	1.96	38061335	VIT_206s0004g05500.1	VIT_206s0004g05500.1	PF14432,PF13041,PF01535	PTHR24015,PTHR24015:SF611					AT3G46790.1	CRR2	Tetratricopeptide repeat (TPR)-like superfamily protein	K2
302	VIT_206s0004g05900	6.15492	5.53014	4.77255	4.01903	4.17525	6.55234	4.16187	4.85093	38062604	VIT_206s0004g05900.1	VIT_206s0004g05900.1	PF03952,PF00113	PTHR11902,PTHR11902:SF13		4.2.1.11	K01689	GO:0006096,GO:0004634,GO:0000287,GO:0000015	AT2G29560.1	ENOC	cytosolic enolase	K2
303	VIT_206s0004g05960	42.1048	5.76487	4.19578	9.31822	20.9123	8.22546	5.95746	17.0609	38063332	VIT_206s0004g05960.1	VIT_206s0004g05960.1		PTHR34686,PTHR34686:SF1					AT4G37300.1	MEE59	maternal effect embryo arrest 59	K2
304	VIT_206s0004g06010	1042.81	456.007	449.233	717.016	1586.76	1055.45	707.567	411.836	38061263	VIT_206s0004g06010.1	VIT_206s0004g06010.1	PF00076	PTHR15241,PTHR15241:SF4				GO:0003676	AT1G07350.1		RNA-binding (RRM/RBD/RNP motifs) family protein	K2
305	VIT_206s0004g06130	77.8169	9.47105	14.0629	39.3232	33.3458	26.944	23.055	23.4678	38060950	VIT_206s0004g06130.1	VIT_206s0004g06130.1	PF13667,PF01964	PTHR30557,PTHR30557:SF1		4.1.99.17	K03147	GO:0051536,GO:0009228	AT2G29630.2	PY,THIC	thiaminC	K2
306	VIT_206s0004g06630	5.20794	1.20629	2.42831	1.34975	4.6898	4.41428	4.0358	1.38883	38062661	VIT_206s0004g06630.1	VIT_206s0004g06630.1	PF05686	PTHR12203,PTHR12203:SF13		2.4.2.26			AT1G07220.1		Arabidopsis thaliana protein of unknown function (DUF821)	K2
307	VIT_206s0004g06690	23.4335	11.238	13.1727	20.2808	16.7048	17.7607	12.3725	13.1753	38061576	VIT_206s0004g06690.1	VIT_206s0004g06690.1	PF01084	PTHR13479,PTHR13479:SF44				GO:0006412,GO:0005840,GO:0005622,GO:0003735	AT1G07210.1		Ribosomal protein S18	K2
308	VIT_206s0004g06780	63.1925	32.8455	30.9393	25.6513	51.8434	33.6516	28.013	19.7032	38061787	VIT_206s0004g06780.1	VIT_206s0004g06780.1	PF03660	PTHR13120	KOG1705		K12834		AT1G07170.2		PHF5-like protein	K2
309	VIT_206s0004g06790	26.5282	3.29795	3.49576	6.01593	8.21704	16.6161	6.73867	8.19782	38062844	VIT_206s0004g06790.1	VIT_206s0004g06790.1	PF14226,PF03171	PTHR10209,PTHR10209:SF206	KOG0143			GO:0055114,GO:0016491	AT5G58660.1		2-oxoglutarate (2OG) and Fe(II)-dependent oxygenase superfamily protein	K2
310	VIT_206s0004g06860	90.2185	71.5001	76.0263	94.1292	77.6284	83.0792	85.6232	84.1087	38061523	VIT_206s0004g06860.1	VIT_206s0004g06860.1	PF09268,PF13838,PF01394,PF00637	PTHR10292,PTHR10292:SF10			K04646	GO:0030132,GO:0030130,GO:0016192,GO:0006886,GO:0005198	AT3G11130.1		Clathrin, heavy chain	K2
311	VIT_206s0004g07100	11.9695	6.63676	8.12778	9.44468	9.22606	12.7264	8.97442	5.21911	38062104	VIT_206s0004g07100.1	VIT_206s0004g07100.1	PF00575,PF07541	PTHR10602,PTHR10602:SF0	KOG2916		K03237	GO:0003676,GO:0005850,GO:0003743,GO:0003723	AT2G40290.1		Eukaryotic translation initiation factor 2 subunit 1	K2
312	VIT_206s0004g07140	31.6132	18.7692	13.4188	17.6044	22.8366	21.1937	11.3067	19.0679	38061163	VIT_206s0004g07140.1	VIT_206s0004g07140.1	PF02466	PTHR14110	KOG3225		K17790		AT3G10110.1	MEE67	Mitochondrial import inner membrane translocase subunit Tim17/Tim22/Tim23 family protein	K2
313	VIT_206s0004g07150	144.776	104.428	107.031	130.845	130.896	108.674	117.836	130.588	38061859	VIT_206s0004g07150.1	VIT_206s0004g07150.1	PF00467,PF01479,PF08071,PF16121,PF00900	PTHR11581	KOG0378		K02987	GO:0003723,GO:0006412,GO:0005840,GO:0005622,GO:0003735	AT5G58420.1		Ribosomal protein S4 (RPS4A) family protein	K2
314	VIT_206s0004g07280	14.6568	8.40628	10.1873	7.1035	8.1283	14.3651	6.03532	10.1833	38061273	VIT_206s0004g07280.1	VIT_206s0004g07280.1	PF00201	PTHR11926,PTHR11926:SF176				GO:0016758,GO:0008152	AT2G30150.1		UDP-Glycosyltransferase superfamily protein	K2
315	VIT_206s0004g07380	24.6209	17.4522	18.735	21.5577	20.8532	23.8858	25.0158	15.4395	38062920	VIT_206s0004g07380.1	VIT_206s0004g07380.1	PF00698	PTHR10982	KOG2926	2.3.1.39	K00645		AT2G30200.1		catalytics;transferases;[acyl-carrier-protein] S-malonyltransferases;binding	K2
316	VIT_206s0004g07450	1.49207	0.246419	0.0824247	0.136522	0.757509	1.26344	0.838383	0.880624	38061723	VIT_206s0004g07450.1	VIT_206s0004g07450.1	PF00657	PTHR22835,PTHR22835:SF152		3.1.1.3		GO:0016788	AT2G31540.1		GDSL-like Lipase/Acylhydrolase superfamily protein	K2
317	VIT_206s0004g08070	4.434	1.32684	1.62038	1.5288	2.88763	2.19048	0.745499	0.969564	38062099	VIT_206s0004g08070.1	VIT_206s0004g08070.1	PF00170	PTHR13690,PTHR13690:SF82				GO:0043565,GO:0006355,GO:0003700	AT2G40620.1		Basic-leucine zipper (bZIP) transcription factor family protein	K2
318	VIT_206s0004g08200	300.624	115.803	96.4151	142.41	481.49	292.004	209.087	119.281	38061297	VIT_206s0004g08200.1	VIT_206s0004g08200.1	PF00179	PTHR24068	KOG0417	6.3.2.19	K06689		AT1G64230.2	UBC28	ubiquitin-conjugating enzyme 28	K2
319	VIT_206s0004g08270	2.39986	0.66533	0.668446	0.109663	1.42875	0.426167	0.359536	1.2509	38061666	VIT_206s0004g08270.1	VIT_206s0004g08270.1	PF02362	PTHR31391,PTHR31391:SF3				GO:0003677	AT5G58280.1		AP2/B3-like transcriptional factor family protein	K2
320	VIT_206s0004g08370	17.7595	13.2832	13.9514	19.0203	12.5924	16.4515	17.4039	15.6908	38062020	VIT_206s0004g08370.1	VIT_206s0004g08370.1	PF10345	PTHR21394	KOG2300		K11266		AT5G51340.1		Tetratricopeptide repeat (TPR)-like superfamily protein	K2
321	VIT_206s0009g01030	31.3767	23.2875	23.8371	23.6764	21.6518	27.2411	27.244	21.2032	38063424	VIT_206s0009g01030.1	VIT_206s0009g01030.1	PF00651	PTHR24411,PTHR24411:SF35	KOG1987		K10523	GO:0005515	AT3G03740.1	ATBPM4,BPM4	BTB-POZ and MATH domain 4	K2
322	VIT_206s0009g02020	52.6131	6.60196	11.3666	16.7102	27.4896	16.8061	10.9818	13.4554	38060945	VIT_206s0009g02020.1	VIT_206s0009g02020.1	PF03953,PF00091	PTHR11588,PTHR11588:SF114		2.4.2.1	K07375	GO:0003924,GO:0007017,GO:0005874	AT5G12250.1	TUB6	beta-6 tubulin	K2
323	VIT_206s0009g02110	4.20809	1.85073	2.37143	3.97219	2.48504	1.37627	2.45016	2.64976	38063061	VIT_206s0009g02110.1	VIT_206s0009g02110.1	PF12937,PF01344	PTHR24412,PTHR24412:SF121				GO:0005515	AT5G26960.1		Galactose oxidase/kelch repeat superfamily protein	K2
324	VIT_206s0009g03070	1.7416	0	0	0.948267	1.68001	1.36711	0.728016	1.64981	38062465	VIT_206s0009g03070.1	VIT_206s0009g03070.1	PF02902	PTHR12606		3.4.22.68		GO:0008234,GO:0006508	AT3G06910.1	ULP1A	UB-like protease 1A	K2
325	VIT_206s0009g03170	22.9378	16.4429	16.4397	19.9544	22.772	20.8895	19.2002	19.1584	38062124	VIT_206s0009g03170.1	VIT_206s0009g03170.1	PF00581,PF13616	PTHR10657		5.2.1.8			AT5G19370.1		rhodanese-like domain-containing protein / PPIC-type PPIASE domain-containing protein	K2
326	VIT_206s0061g00270	616.967	108.317	118.742	283.456	1385.8	557.262	265.433	190.241	38062870	VIT_206s0061g00270.1	VIT_206s0061g00270.1	PF00118	PTHR11353,PTHR11353:SF11				GO:0005524	AT2G28000.1	CH-CPN60A,CPN60A,SLP	chaperonin-60alpha	K2
327	VIT_206s0061g00350	7.13703	3.01698	4.21211	3.65933	3.25602	4.95841	3.96382	2.62729	38062840	VIT_206s0061g00350.1	VIT_206s0061g00350.1	PF00005,PF01061	PTHR19241,PTHR19241:SF200	KOG0061	3.6.3.19		GO:0016887,GO:0005524,GO:0016020	AT2G28070.1		ABC-2 type transporter family protein	K2
328	VIT_206s0061g00790	123.924	37.4234	49.8025	72.2814	111.616	99.106	55.3893	55.6869	38062183	VIT_206s0061g00790.1	VIT_206s0061g00790.1	PF00355,PF08417	PTHR21266,PTHR21266:SF24		1.14.12.20	K13071	GO:0055114,GO:0051537,GO:0016491,GO:0010277	AT3G44880.1	ACD1,LLS1,PAO	Pheophorbide a oxygenase family protein with Rieske [2Fe-2S] domain	K2
329	VIT_206s0061g00840	7.93678	4.71551	8.39217	7.9529	5.07889	7.40754	7.57488	6.3075	38061410	VIT_206s0061g00840.1	VIT_206s0061g00840.1	PF00628,PF16135	PTHR24098,PTHR24098:SF5		2.3.1.48		GO:0005515	AT2G27980.1		Acyl-CoA N-acyltransferase with RING/FYVE/PHD-type zinc finger domain	K2
330	VIT_206s0061g01240	54.7208	35.5397	36.8666	42.6669	45.566	39.706	31.0274	38.8154	38061144	VIT_206s0061g01240.1	VIT_206s0061g01240.1		PTHR31802,PTHR31802:SF5		3.5.1.98			AT5G03740.1	HD2C,HDT3	histone deacetylase 2C	K2
331	VIT_206s0061g01330	15.1869	8.81122	10.2972	21.386	17.1818	18.9046	17.1549	16.503	38062778	VIT_206s0061g01330.1	VIT_206s0061g01330.1	PF01246	PTHR10792,PTHR10792:SF8	KOG1723		K02896	GO:0042254	AT2G44860.1		Ribosomal protein L24e family protein	K2
332	VIT_206s0080g00310	40.0989	11.9458	11.4721	31.3451	34.6419	26.7702	14.2019	20.2748	38063347	VIT_206s0080g00310.1	VIT_206s0080g00310.1	PF12697	PTHR10992,PTHR10992:SF886	KOG1454				AT5G22460.1		alpha/beta-Hydrolases superfamily protein	K2
333	VIT_206s0080g00410	67.7073	38.3053	36.1764	37.6102	38.3811	37.9035	24.8047	20.8205	38062132	VIT_206s0080g00410.1	VIT_206s0080g00410.1	PF00111	PTHR19370,PTHR19370:SF127			K02639	GO:0051536,GO:0009055	AT2G27510.1	ATFD3,FD3	ferredoxin 3	K2
334	VIT_206s0080g00440	18.8263	7.68593	7.80647	14.5925	11.6798	13.8029	12.8593	9.77571	38062277	VIT_206s0080g00440.1	VIT_206s0080g00440.1	PF00380	PTHR21569,PTHR21569:SF1	KOG1753		K02996	GO:0006412,GO:0005840,GO:0003735	AT3G49080.1		Ribosomal protein S5 domain 2-like superfamily protein	K2
335	VIT_206s0080g00550	85.8652	81.1494	80.5189	95.1724	73.2018	80.9206	85.3868	89.067	38062382	VIT_206s0080g00550.1	VIT_206s0080g00550.1	PF00271,PF00270	PTHR24031,PTHR24031:SF313		3.6.4.13	K13025	GO:0005524,GO:0003676	AT3G19760.1	EIF4A-III	eukaryotic initiation factor 4A-III	K2
336	VIT_206s0080g00740	178.42	97.484	108.992	129.542	151.263	132.463	100.707	108.957	38061737	VIT_206s0080g00740.1	VIT_206s0080g00740.1	PF00411	PTHR11759,PTHR11759:SF12	KOG0407		K02955	GO:0006412,GO:0005840,GO:0003735	AT3G52580.1		Ribosomal protein S11 family protein	K2
337	VIT_206s0080g00860	19.41	17.883	19.7466	15.2357	12.6789	16.282	15.0998	16.7382	38063655	VIT_206s0080g00860.1	VIT_206s0080g00860.1	PF06058	PTHR16290,PTHR16290:SF3	KOG2868		K12611		AT1G08370.1	ATDCP1,DCP1	decapping 1	K2
338	VIT_206s0080g00890	46.5591	24.767	26.0897	36.7107	28.5654	32.1969	27.9628	33.8623	38061035	VIT_206s0080g00890.1	VIT_206s0080g00890.1		PTHR34118,PTHR34118:SF1					AT5G22340.1			K2
339	VIT_206s0080g01120	7.2827	2.39841	6.17505	9.16364	5.87139	7.20756	6.43643	6.37536	38063084	VIT_206s0080g01120.1	VIT_206s0080g01120.1		PTHR30314,PTHR30314:SF12		3.6.5.6			AT5G22210.1			K2
340	VIT_207s0005g00010	467.703	83.9699	67.9704	277.294	397.734	391.517	225.813	197.329	38055566	VIT_207s0005g00010.1	VIT_207s0005g00010.1	PF00043,PF02798	PTHR11260,PTHR11260:SF201	KOG0867	2.5.1.18	K00799	GO:0005515	AT2G47730.1	ATGSTF5,ATGSTF8,GST6,GSTF8	glutathione S-transferase phi 8	K2
341	VIT_207s0005g00240	28.6338	12.4153	12.1656	18.3399	29.7355	22.1703	17.5797	14.6786	38057686	VIT_207s0005g00240.1	VIT_207s0005g00240.1	PF00400	PTHR22889	KOG1188			GO:0005515	AT2G47790.1		Transducin/WD40 repeat-like superfamily protein	K2
342	VIT_207s0005g00880	32.869	26.3005	25.3059	28.8326	33.3304	31.6232	28.2678	27.3828	38057348	VIT_207s0005g00880.1	VIT_207s0005g00880.1	PF10415,PF00206	PTHR11444,PTHR11444:SF1		4.2.1.2	K01679	GO:0016829,GO:0006099	AT2G47510.2	FUM1	fumarase 1	K2
343	VIT_207s0005g01040	10.8237	4.0683	7.68848	8.58801	7.112	6.86684	5.30708	3.13215	38056331	VIT_207s0005g01040.1	VIT_207s0005g01040.1	PF01501	PTHR13778,PTHR13778:SF8		2.4.1.43		GO:0016757	AT3G62660.1	GATL7	galacturonosyltransferase-like 7	K2
344	VIT_207s0005g01220	115.378	50.9661	42.4129	57.0605	58.366	64.633	53.6792	52.803	38056185	VIT_207s0005g01220.1	VIT_207s0005g01220.1	PF01556,PF00226	PTHR24078,PTHR24078:SF257	KOG0713		K09517		AT3G62600.1	ATERDJ3B,ERDJ3B	DNAJ heat shock family protein	K2
345	VIT_207s0005g01420	11.3187	7.51558	8.44823	9.9203	9.36822	10.1327	10.5756	10.948	38056241	VIT_207s0005g01420.1	VIT_207s0005g01420.1	PF00439,PF00400	PTHR16266			K11797	GO:0005515	AT5G49430.1		WD40/YVTN repeat-like-containing domain;Bromodomain	K2
346	VIT_207s0005g01460	65.2608	29.4142	28.7863	52.716	48.1929	56.8483	47.6146	60.3871	38057630	VIT_207s0005g01460.1	VIT_207s0005g01460.1	PF00326	PTHR11731,PTHR11731:SF117	KOG2100	3.4.19.1		GO:0008236,GO:0006508	AT2G47390.1		Prolyl oligopeptidase family protein	K2
347	VIT_207s0005g01650	27.4581	13.5195	13.4867	21.2135	25.1367	22.4715	18.4186	20.9575	38057338	VIT_207s0005g01650.1	VIT_207s0005g01650.1	PF13620	PTHR23303					AT3G62360.1		Carbohydrate-binding-like fold	K2
348	VIT_207s0005g01740	33.3784	25.1237	24.7336	29.905	21.1503	25.6305	24.4745	23.2254	38056823	VIT_207s0005g01740.1	VIT_207s0005g01740.1		PTHR34210,PTHR34210:SF2					AT3G62330.1		Zinc knuckle (CCHC-type) family protein	K2
349	VIT_207s0005g02000	114.259	79.1217	66.2937	83.6912	92.145	91.3287	78.1305	86.1337	38056395	VIT_207s0005g02000.1	VIT_207s0005g02000.1	PF09439	PTHR11711,PTHR11711:SF181	KOG0070		K07977,K07937		AT3G62290.1	ARFA1E,ATARFA1E	ADP-ribosylation factor A1E	K2
350	VIT_207s0005g02010	32.6055	24.163	22.0005	23.0565	22.7341	26.3312	18.2071	21.1267	38055929	VIT_207s0005g02010.1	VIT_207s0005g02010.1	PF00543	PTHR30115,PTHR30115:SF11				GO:0030234,GO:0006808	AT4G01900.1	GLB1,PII	GLNB1 homolog	K2
351	VIT_207s0005g02030	0.722817	0.0254527	0	0.0785853	0.441179	0.508822	0.29984	0.414404	38057115	VIT_207s0005g02030.1	VIT_207s0005g02030.1	PF00657	PTHR22835,PTHR22835:SF158		3.2.1.51		GO:0016788	AT1G09390.1		GDSL-like Lipase/Acylhydrolase superfamily protein	K2
352	VIT_207s0005g02120	34.6541	23.3698	20.461	28.6253	21.1226	23.418	20.0666	18.975	38057785	VIT_207s0005g02120.1	VIT_207s0005g02120.1	PF03364	PTHR33824,PTHR33824:SF3					AT1G02475.1		Polyketide cyclase/dehydrase and lipid transport superfamily protein	K2
353	VIT_207s0005g03040	5.58838	2.28531	2.29098	4.69792	3.24938	5.32016	4.96773	2.69908	38056647	VIT_207s0005g03040.1	VIT_207s0005g03040.1	PF00533,PF05406,PF08063,PF02877,PF00645,PF00644	PTHR10459,PTHR10459:SF60	KOG1037	2.4.2.30	K10798	GO:0005634,GO:0003950,GO:0006471,GO:0008270,GO:0003677	AT2G31320.1	ATPARP2,PARP2	poly(ADP-ribose) polymerase 2	K2
354	VIT_207s0005g03110	9.35345	4.22393	4.08426	9.23758	7.7566	7.38924	5.62207	4.34272	38055374	VIT_207s0005g03110.1	VIT_207s0005g03110.1	PF13181,PF13374,PF13424	PTHR19959,PTHR19959:SF168	KOG1840			GO:0005515	AT2G31240.1		Tetratricopeptide repeat (TPR)-like superfamily protein	K2
355	VIT_207s0005g03170	25.7491	18.2941	21.3217	28.6451	25.318	26.0242	22.9144	17.6938	38057227	VIT_207s0005g03170.1	VIT_207s0005g03170.1	PF01255	PTHR10291,PTHR10291:SF0	KOG1602	2.5.1.20	K11778	GO:0016765	AT2G17570.1		Undecaprenyl pyrophosphate synthetase family protein	K2
356	VIT_207s0005g03640	62.3146	57.4253	51.1337	55.8723	44.7961	48.5109	47.1307	45.7239	38055777	VIT_207s0005g03640.1	VIT_207s0005g03640.1	PF05817	PTHR12640,PTHR12640:SF0	KOG2447	2.4.99.18	K12667	GO:0016021,GO:0008250,GO:0006487	AT4G21150.1	HAP6	ribophorin II (RPN2) family protein	K2
357	VIT_207s0005g04390	2.11771	0	0	0.0357947	1.05093	0.993811	0.229061	0.352828	38056632	VIT_207s0005g04390.1	VIT_207s0005g04390.1	PF08263,PF00560,PF13855,PF00069	PTHR27000,PTHR27000:SF217	KOG1187	2.7.11.1		GO:0005515,GO:0006468,GO:0005524,GO:0004672	AT4G28650.1		Leucine-rich repeat transmembrane protein kinase family protein	K2
358	VIT_207s0005g04460	15.4695	10.168	11.1506	13.5761	12.0381	14.7493	13.8957	12.3009	38058337	VIT_207s0005g04460.1	VIT_207s0005g04460.1	PF00005,PF00664	PTHR24223,PTHR24223:SF189		3.6.3.44		GO:0016887,GO:0005524,GO:0055085,GO:0042626,GO:0016021,GO:0006810	AT1G04120.1	ABCC5,ATABCC5,ATMRP5,MRP5	multidrug resistance-associated protein 5	K2
359	VIT_207s0005g04480	14.0307	4.38014	3.84951	8.08466	10.4494	8.04677	6.68778	4.73852	38058307	VIT_207s0005g04480.1	VIT_207s0005g04480.1	PF00282	PTHR11999,PTHR11999:SF70		4.1.1.25	K01592	GO:0030170,GO:0019752,GO:0016831	AT2G20340.1		Pyridoxal phosphate (PLP)-dependent transferases superfamily protein	K2
360	VIT_207s0005g04770	1.27928	0	0	0	0.84797	0.369192	0.236572	0.437954	38057962	VIT_207s0005g04770.1	VIT_207s0005g04770.1	PF00168,PF08372	PTHR10024,PTHR10024:SF253				GO:0005515	AT1G04150.1		C2 calcium/lipid-binding plant phosphoribosyltransferase family protein	K2
361	VIT_207s0005g04860	33.4449	18.7015	33.8319	31.8538	24.4424	27.5491	27.339	25.0719	38057026	VIT_207s0005g04860.1	VIT_207s0005g04860.1	PF00462	PTHR10168,PTHR10168:SF14	KOG1752	1.8.1.9	K03676	GO:0045454,GO:0015035,GO:0009055	AT4G28730.1		Glutaredoxin family protein	K2
[truncated: 609 more rows]

## Sheet: K3
	GENE ID	Sample Time Points								X.pacId	Transcript Name	Peptide Name	Pfam	Panther	KOG	ec	KO	GO	Best Hit Arabi. Name	Arabi Symbol	Arabi. Defline	Fit Cluster
[truncated: 491 more rows]

[truncated: 12 more sheets: K4, K5, K6, K7, K8, K9, K10, K11, K12, K13, K14, K15]
