# Supplementary material for: Transcriptome Profiling of a Salt Excluder Hybrid Grapevine Rootstock ‘Ruggeri’ throughout Salinity
Source: Plants (Basel). 2024 Mar 14;13(6):837. doi: 10.3390/plants13060837 (PMC10974295; doi:10.3390/plants13060837)
Supplement: Supplementary file 1 [file plants-13-00837-s001.zip › Tabel S4.xlsx]

## Sheet: K1_GOterm
Table S4: The GO-term information of the gene list of each K-means cluster. Each sheet tab contains GO-term of gene list of each cluster (K1_GOterm - K15_GOterm).
Source	Term Name	Term ID	Adjusted P Value	Negative log10 of Adjusted P Value	Term Size	Query Size	Intersection Size	Effective Domain Size	Intersections
GO:MF	molecular_function	GO:0003674	6.93e-22	21.1593	21589	1061	807	35134	VITVI10G01213,VITVI07G00073,VITVI07G00071,VITVI07G00062,VITVI10G00380,VITVI10G00383,VITVI10G04259,VITVI10G00185,VITVI10G00336,VITVI04G01104,VITVI04G01105,VITVI07G02498,VITVI07G02881,VITVI07G02896,VITVI13G01243,VITVI10G00455,VITVI10G00399,VITVI04G04411,VITVI07G01363,VITVI07G01364,VITVI14G02411,VITVI13G00239,VITVI07G02734,VITVI07G02555,VITVI10G02135,VITVI10G02176,VITVI10G02343,VITVI07G04656,VITVI07…
GO:MF	binding	GO:0005488	3.57e-13	12.4479	15172	1061	586	35134	VITVI10G01213,VITVI07G00073,VITVI07G00071,VITVI07G00062,VITVI10G00380,VITVI10G04259,VITVI10G00185,VITVI04G01104,VITVI04G01105,VITVI07G02881,VITVI07G02896,VITVI07G01363,VITVI07G01364,VITVI14G02411,VITVI13G00239,VITVI07G02734,VITVI07G02555,VITVI10G02135,VITVI10G02176,VITVI10G02343,VITVI07G04656,VITVI07G01345,VITVI02G01726,VITVI10G00385,VITVI00G04508,VITVI10G04302,VITVI07G03083,VITVI07G03085,VITVI01…
GO:MF	catalytic activity	GO:0003824	1.26e-11	10.8979	11701	1061	469	35134	VITVI10G01213,VITVI07G00071,VITVI07G00062,VITVI10G00383,VITVI10G00185,VITVI10G00336,VITVI07G02498,VITVI07G02896,VITVI13G01243,VITVI10G00455,VITVI10G00399,VITVI04G04411,VITVI14G02411,VITVI13G00239,VITVI07G02555,VITVI10G02135,VITVI07G04656,VITVI02G01726,VITVI00G04508,VITVI10G00414,VITVI07G03083,VITVI15G04535,VITVI00G04705,VITVI07G03085,VITVI00G04839,VITVI02G04129,VITVI01G01173,VITVI01G01304,VITVI01…
GO:MF	protein binding	GO:0005515	2.39e-08	7.62198	4981	1061	226	35134	VITVI07G00073,VITVI10G00380,VITVI10G00185,VITVI04G01104,VITVI04G01105,VITVI07G01363,VITVI07G01364,VITVI14G02411,VITVI07G02734,VITVI10G02176,VITVI10G02343,VITVI07G01345,VITVI10G00385,VITVI10G04302,VITVI01G01302,VITVI01G01413,VITVI01G01418,VITVI01G01439,VITVI01G00038,VITVI01G00056,VITVI01G00182,VITVI01G00190,VITVI01G00376,VITVI01G00474,VITVI01G00484,VITVI01G00970,VITVI01G01729,VITVI02G00654,VITVI02…
GO:MF	purine ribonucleoside triphosphate binding	GO:0035639	1.55e-07	6.80922	3364	1061	163	35134	VITVI10G01213,VITVI07G00073,VITVI07G00071,VITVI07G00062,VITVI14G02411,VITVI13G00239,VITVI10G02135,VITVI07G04656,VITVI01G01439,VITVI01G02224,VITVI01G00038,VITVI01G00108,VITVI01G00176,VITVI01G00182,VITVI01G00199,VITVI01G04077,VITVI02G00617,VITVI02G00724,VITVI02G00188,VITVI02G00315,VITVI02G00327,VITVI02G00380,VITVI03G01013,VITVI03G00284,VITVI03G00400,VITVI04G01893,VITVI04G00523,VITVI04G00613,VITVI04…
GO:MF	hydrolase activity	GO:0016787	2.04e-07	6.6912	3763	1061	177	35134	VITVI10G01213,VITVI07G00071,VITVI10G00185,VITVI07G02498,VITVI07G02896,VITVI07G04656,VITVI00G04508,VITVI00G04839,VITVI01G01304,VITVI01G02224,VITVI01G01646,VITVI01G00103,VITVI01G00108,VITVI01G00176,VITVI01G00199,VITVI01G00295,VITVI01G00793,VITVI01G02092,VITVI02G00617,VITVI02G00188,VITVI02G00315,VITVI02G00324,VITVI02G00327,VITVI02G00411,VITVI02G00442,VITVI02G01228,VITVI02G00553,VITVI03G00009,VITVI03…
GO:MF	ATP binding	GO:0005524	1.24072e-06	5.90632	3051	1061	147	35134	VITVI10G01213,VITVI07G00073,VITVI07G00071,VITVI07G00062,VITVI14G02411,VITVI13G00239,VITVI10G02135,VITVI01G01439,VITVI01G02224,VITVI01G00038,VITVI01G00108,VITVI01G00176,VITVI01G00182,VITVI01G00199,VITVI01G04077,VITVI02G00617,VITVI02G00724,VITVI02G00188,VITVI02G00315,VITVI02G00380,VITVI03G00284,VITVI03G00400,VITVI04G00523,VITVI04G01142,VITVI04G01575,VITVI04G01677,VITVI04G01691,VITVI04G00749,VITVI05…
GO:MF	ion binding	GO:0043167	2.21694e-06	5.65425	8296	1061	328	35134	VITVI10G01213,VITVI07G00073,VITVI07G00071,VITVI07G00062,VITVI10G04259,VITVI10G00185,VITVI07G02881,VITVI14G02411,VITVI13G00239,VITVI07G02734,VITVI07G02555,VITVI10G02135,VITVI10G02176,VITVI07G04656,VITVI02G01726,VITVI10G04302,VITVI07G03083,VITVI07G03085,VITVI01G01374,VITVI01G01439,VITVI01G02224,VITVI01G00038,VITVI01G00108,VITVI01G00162,VITVI01G00176,VITVI01G00182,VITVI01G00192,VITVI01G00199,VITVI01…
GO:MF	ATP-dependent activity	GO:0140657	7.6451e-06	5.11662	1087	1061	66	35134	VITVI10G01213,VITVI07G00071,VITVI13G00239,VITVI01G02224,VITVI01G00108,VITVI01G00176,VITVI01G00199,VITVI02G00617,VITVI04G00523,VITVI04G01142,VITVI04G01677,VITVI04G00749,VITVI05G00287,VITVI05G00453,VITVI05G00872,VITVI06G04090,VITVI06G00580,VITVI06G01070,VITVI06G01262,VITVI06G01950,VITVI07G00307,VITVI07G00315,VITVI07G00442,VITVI07G00607,VITVI07G02270,VITVI07G02013,VITVI08G01929,VITVI08G02413,VITVI08…
GO:MF	carbohydrate derivative binding	GO:0097367	9.30446e-06	5.03131	4307	1061	188	35134	VITVI10G01213,VITVI07G00073,VITVI07G00071,VITVI07G00062,VITVI14G02411,VITVI13G00239,VITVI07G02734,VITVI10G02135,VITVI07G04656,VITVI00G04508,VITVI10G04302,VITVI01G01439,VITVI01G02224,VITVI01G00038,VITVI01G00108,VITVI01G00176,VITVI01G00182,VITVI01G00199,VITVI01G04077,VITVI02G00617,VITVI02G00724,VITVI02G00188,VITVI02G00315,VITVI02G00327,VITVI02G00380,VITVI03G01856,VITVI03G01013,VITVI03G00284,VITVI03…
GO:MF	nucleoside phosphate binding	GO:1901265	1.58425e-05	4.80018	4636	1061	198	35134	VITVI10G01213,VITVI07G00073,VITVI07G00071,VITVI07G00062,VITVI14G02411,VITVI13G00239,VITVI07G02734,VITVI07G02555,VITVI10G02135,VITVI07G04656,VITVI02G01726,VITVI10G04302,VITVI01G01362,VITVI01G01439,VITVI01G02224,VITVI01G00038,VITVI01G00108,VITVI01G00176,VITVI01G00182,VITVI01G00199,VITVI01G04077,VITVI02G00617,VITVI02G00724,VITVI02G00188,VITVI02G00315,VITVI02G00327,VITVI02G00380,VITVI03G01856,VITVI03…
GO:MF	nucleotide binding	GO:0000166	1.58425e-05	4.80018	4636	1061	198	35134	VITVI10G01213,VITVI07G00073,VITVI07G00071,VITVI07G00062,VITVI14G02411,VITVI13G00239,VITVI07G02734,VITVI07G02555,VITVI10G02135,VITVI07G04656,VITVI02G01726,VITVI10G04302,VITVI01G01362,VITVI01G01439,VITVI01G02224,VITVI01G00038,VITVI01G00108,VITVI01G00176,VITVI01G00182,VITVI01G00199,VITVI01G04077,VITVI02G00617,VITVI02G00724,VITVI02G00188,VITVI02G00315,VITVI02G00327,VITVI02G00380,VITVI03G01856,VITVI03…
GO:MF	small molecule binding	GO:0036094	1.70177e-05	4.7691	4904	1061	207	35134	VITVI10G01213,VITVI07G00073,VITVI07G00071,VITVI07G00062,VITVI14G02411,VITVI13G00239,VITVI07G02734,VITVI07G02555,VITVI10G02135,VITVI07G04656,VITVI02G01726,VITVI10G04302,VITVI01G01362,VITVI01G01439,VITVI01G02224,VITVI01G00038,VITVI01G00108,VITVI01G00176,VITVI01G00182,VITVI01G00199,VITVI01G04077,VITVI01G00568,VITVI02G00617,VITVI02G00724,VITVI02G00188,VITVI02G00315,VITVI02G00327,VITVI02G00380,VITVI02…
GO:MF	helicase activity	GO:0004386	2.85057e-05	4.54507	193	1061	21	35134	VITVI04G00523,VITVI05G00453,VITVI05G00872,VITVI06G04090,VITVI06G00580,VITVI06G01070,VITVI07G00315,VITVI07G00442,VITVI08G00301,VITVI08G00097,VITVI10G00425,VITVI11G00923,VITVI11G00979,VITVI14G01741,VITVI15G00014,VITVI15G00864,VITVI17G00262,VITVI17G00701,VITVI18G00373,VITVI18G01725,VITVI19G00675
GO:MF	purine nucleotide binding	GO:0017076	3.08077e-05	4.51134	4380	1061	187	35134	VITVI10G01213,VITVI07G00073,VITVI07G00071,VITVI07G00062,VITVI14G02411,VITVI13G00239,VITVI07G02734,VITVI07G02555,VITVI10G02135,VITVI07G04656,VITVI10G04302,VITVI01G01362,VITVI01G01439,VITVI01G02224,VITVI01G00038,VITVI01G00108,VITVI01G00176,VITVI01G00182,VITVI01G00199,VITVI01G04077,VITVI02G00617,VITVI02G00724,VITVI02G00188,VITVI02G00315,VITVI02G00327,VITVI02G00380,VITVI03G01856,VITVI03G01013,VITVI03…
GO:MF	organic cyclic compound binding	GO:0097159	3.4739e-05	4.45918	10094	1061	377	35134	VITVI10G01213,VITVI07G00073,VITVI07G00071,VITVI07G00062,VITVI10G00380,VITVI10G04259,VITVI14G02411,VITVI13G00239,VITVI07G02734,VITVI07G02555,VITVI10G02135,VITVI07G04656,VITVI02G01726,VITVI10G04302,VITVI01G01362,VITVI01G01391,VITVI01G01439,VITVI01G02224,VITVI01G01680,VITVI01G00036,VITVI01G00038,VITVI01G00060,VITVI01G00108,VITVI01G00162,VITVI01G00171,VITVI01G00176,VITVI01G00182,VITVI01G00199,VITVI01…
GO:MF	ribonucleotide binding	GO:0032553	3.77396e-05	4.4232	4259	1061	182	35134	VITVI10G01213,VITVI07G00073,VITVI07G00071,VITVI07G00062,VITVI14G02411,VITVI13G00239,VITVI07G02734,VITVI10G02135,VITVI07G04656,VITVI10G04302,VITVI01G01439,VITVI01G02224,VITVI01G00038,VITVI01G00108,VITVI01G00176,VITVI01G00182,VITVI01G00199,VITVI01G04077,VITVI02G00617,VITVI02G00724,VITVI02G00188,VITVI02G00315,VITVI02G00327,VITVI02G00380,VITVI03G01856,VITVI03G01013,VITVI03G00284,VITVI03G00400,VITVI04…
GO:MF	pyrophosphatase activity	GO:0016462	4.91667e-05	4.30833	863	1061	53	35134	VITVI10G01213,VITVI07G00071,VITVI01G02224,VITVI01G00108,VITVI01G00176,VITVI01G00199,VITVI02G00617,VITVI02G00315,VITVI02G00327,VITVI03G01013,VITVI04G01893,VITVI04G00523,VITVI04G01142,VITVI04G01575,VITVI04G01677,VITVI04G00749,VITVI05G00611,VITVI05G01314,VITVI06G04090,VITVI06G01262,VITVI07G00307,VITVI07G00607,VITVI07G02270,VITVI07G02013,VITVI08G01640,VITVI08G01929,VITVI08G02413,VITVI09G00189,VITVI11…
GO:MF	catalytic activity, acting on a nucleic acid	GO:0140640	4.91667e-05	4.30833	1028	1061	60	35134	VITVI13G00239,VITVI01G00836,VITVI02G01228,VITVI03G01011,VITVI03G00308,VITVI04G00231,VITVI04G00523,VITVI04G00749,VITVI05G00421,VITVI05G00453,VITVI05G00872,VITVI05G01320,VITVI05G01493,VITVI06G04090,VITVI06G00376,VITVI06G00580,VITVI06G01070,VITVI06G01262,VITVI07G00307,VITVI07G00315,VITVI07G00442,VITVI07G02048,VITVI08G01767,VITVI08G00301,VITVI08G00097,VITVI08G00120,VITVI10G00425,VITVI10G00055,VITVI11…
GO:MF	heterocyclic compound binding	GO:1901363	4.91667e-05	4.30833	10081	1061	375	35134	VITVI10G01213,VITVI07G00073,VITVI07G00071,VITVI07G00062,VITVI10G00380,VITVI10G04259,VITVI14G02411,VITVI13G00239,VITVI07G02734,VITVI07G02555,VITVI10G02135,VITVI07G04656,VITVI02G01726,VITVI10G04302,VITVI01G01362,VITVI01G01391,VITVI01G01439,VITVI01G02224,VITVI01G01680,VITVI01G00036,VITVI01G00038,VITVI01G00060,VITVI01G00108,VITVI01G00162,VITVI01G00171,VITVI01G00176,VITVI01G00182,VITVI01G00199,VITVI01…
GO:MF	ribonucleoside triphosphate phosphatase activity	GO:0017111	5.6314e-05	4.24938	778	1061	49	35134	VITVI10G01213,VITVI07G00071,VITVI01G02224,VITVI01G00108,VITVI01G00176,VITVI01G00199,VITVI02G00617,VITVI02G00327,VITVI03G01013,VITVI04G01893,VITVI04G00523,VITVI04G01142,VITVI04G01575,VITVI04G01677,VITVI04G00749,VITVI05G00611,VITVI06G04090,VITVI06G01262,VITVI07G00307,VITVI07G00607,VITVI07G02270,VITVI07G02013,VITVI08G01929,VITVI08G02413,VITVI09G00189,VITVI11G00334,VITVI11G01176,VITVI12G00054,VITVI12…
GO:MF	hydrolase activity, acting on acid anhydrides, in phosphorus-containing anhydrides	GO:0016818	5.81923e-05	4.23513	872	1061	53	35134	VITVI10G01213,VITVI07G00071,VITVI01G02224,VITVI01G00108,VITVI01G00176,VITVI01G00199,VITVI02G00617,VITVI02G00315,VITVI02G00327,VITVI03G01013,VITVI04G01893,VITVI04G00523,VITVI04G01142,VITVI04G01575,VITVI04G01677,VITVI04G00749,VITVI05G00611,VITVI05G01314,VITVI06G04090,VITVI06G01262,VITVI07G00307,VITVI07G00607,VITVI07G02270,VITVI07G02013,VITVI08G01640,VITVI08G01929,VITVI08G02413,VITVI09G00189,VITVI11…
GO:MF	hydrolase activity, acting on acid anhydrides	GO:0016817	6.80916e-05	4.16691	878	1061	53	35134	VITVI10G01213,VITVI07G00071,VITVI01G02224,VITVI01G00108,VITVI01G00176,VITVI01G00199,VITVI02G00617,VITVI02G00315,VITVI02G00327,VITVI03G01013,VITVI04G01893,VITVI04G00523,VITVI04G01142,VITVI04G01575,VITVI04G01677,VITVI04G00749,VITVI05G00611,VITVI05G01314,VITVI06G04090,VITVI06G01262,VITVI07G00307,VITVI07G00607,VITVI07G02270,VITVI07G02013,VITVI08G01640,VITVI08G01929,VITVI08G02413,VITVI09G00189,VITVI11…
GO:MF	anion binding	GO:0043168	8.75294e-05	4.05785	4775	1061	197	35134	VITVI10G01213,VITVI07G00073,VITVI07G00071,VITVI07G00062,VITVI14G02411,VITVI13G00239,VITVI07G02734,VITVI10G02135,VITVI07G04656,VITVI02G01726,VITVI10G04302,VITVI01G01439,VITVI01G02224,VITVI01G00038,VITVI01G00108,VITVI01G00176,VITVI01G00182,VITVI01G00199,VITVI01G04077,VITVI01G00568,VITVI02G00617,VITVI02G00724,VITVI02G00188,VITVI02G00315,VITVI02G00327,VITVI02G00380,VITVI02G00467,VITVI03G01856,VITVI03…
GO:MF	ATP hydrolysis activity	GO:0016887	8.75294e-05	4.05785	528	1061	37	35134	VITVI10G01213,VITVI07G00071,VITVI01G02224,VITVI01G00108,VITVI01G00176,VITVI01G00199,VITVI02G00617,VITVI04G00523,VITVI04G01142,VITVI04G01677,VITVI04G00749,VITVI06G04090,VITVI06G01262,VITVI07G00307,VITVI07G00607,VITVI07G02270,VITVI07G02013,VITVI08G01929,VITVI08G02413,VITVI09G00189,VITVI11G00334,VITVI11G01176,VITVI12G00054,VITVI12G01979,VITVI13G01651,VITVI13G00858,VITVI14G00472,VITVI14G00743,VITVI14…
GO:MF	purine ribonucleotide binding	GO:0032555	0.000107141	3.97004	4215	1061	177	35134	VITVI10G01213,VITVI07G00073,VITVI07G00071,VITVI07G00062,VITVI14G02411,VITVI13G00239,VITVI07G02734,VITVI10G02135,VITVI07G04656,VITVI10G04302,VITVI01G01439,VITVI01G02224,VITVI01G00038,VITVI01G00108,VITVI01G00176,VITVI01G00182,VITVI01G00199,VITVI01G04077,VITVI02G00617,VITVI02G00724,VITVI02G00188,VITVI02G00315,VITVI02G00327,VITVI02G00380,VITVI03G01856,VITVI03G01013,VITVI03G00284,VITVI03G00400,VITVI04…
GO:MF	adenyl nucleotide binding	GO:0030554	0.000143743	3.84241	4066	1061	171	35134	VITVI10G01213,VITVI07G00073,VITVI07G00071,VITVI07G00062,VITVI14G02411,VITVI13G00239,VITVI07G02734,VITVI07G02555,VITVI10G02135,VITVI10G04302,VITVI01G01362,VITVI01G01439,VITVI01G02224,VITVI01G00038,VITVI01G00108,VITVI01G00176,VITVI01G00182,VITVI01G00199,VITVI01G04077,VITVI02G00617,VITVI02G00724,VITVI02G00188,VITVI02G00315,VITVI02G00380,VITVI03G01856,VITVI03G00284,VITVI03G00400,VITVI04G00009,VITVI04…
GO:MF	NAD+ kinase activity	GO:0003951	0.000172468	3.76329	10	1061	5	35134	VITVI10G00383,VITVI06G00236,VITVI11G01318,VITVI17G00683,VITVI19G00305
GO:MF	transferase activity	GO:0016740	0.000213574	3.67045	5146	1061	207	35134	VITVI07G00062,VITVI10G00383,VITVI10G00336,VITVI13G01243,VITVI10G00455,VITVI04G04411,VITVI14G02411,VITVI10G02135,VITVI15G04535,VITVI00G04705,VITVI02G04129,VITVI01G01173,VITVI01G01374,VITVI01G01439,VITVI01G00038,VITVI01G00056,VITVI01G00178,VITVI01G00182,VITVI01G00192,VITVI01G00286,VITVI01G04077,VITVI01G00317,VITVI01G00484,VITVI01G00793,VITVI01G00836,VITVI01G00995,VITVI01G00614,VITVI02G00724,VITVI02…
GO:MF	structural constituent of nuclear pore	GO:0017056	0.00034775	3.45873	37	1061	8	35134	VITVI03G01316,VITVI03G00103,VITVI06G00017,VITVI08G01946,VITVI09G00061,VITVI09G00816,VITVI14G01330,VITVI19G01763
GO:MF	adenyl ribonucleotide binding	GO:0032559	0.000702196	3.15354	3902	1061	161	35134	VITVI10G01213,VITVI07G00073,VITVI07G00071,VITVI07G00062,VITVI14G02411,VITVI13G00239,VITVI07G02734,VITVI10G02135,VITVI10G04302,VITVI01G01439,VITVI01G02224,VITVI01G00038,VITVI01G00108,VITVI01G00176,VITVI01G00182,VITVI01G00199,VITVI01G04077,VITVI02G00617,VITVI02G00724,VITVI02G00188,VITVI02G00315,VITVI02G00380,VITVI03G01856,VITVI03G00284,VITVI03G00400,VITVI04G00523,VITVI04G01142,VITVI04G01575,VITVI04…
GO:MF	ubiquitin-like protein ligase activity	GO:0061659	0.00113135	2.9464	219	1061	19	35134	VITVI01G00192,VITVI01G00614,VITVI02G00043,VITVI02G00384,VITVI03G00139,VITVI03G00519,VITVI04G00205,VITVI06G00501,VITVI06G00746,VITVI07G00484,VITVI07G01826,VITVI08G01201,VITVI13G00585,VITVI13G01483,VITVI14G01303,VITVI15G01648,VITVI15G00842,VITVI17G00435,VITVI18G00546
GO:MF	GTPase binding	GO:0051020	0.00127753	2.89363	33	1061	7	35134	VITVI01G00190,VITVI03G00180,VITVI06G00053,VITVI13G01256,VITVI14G00254,VITVI16G01510,VITVI16G01394
GO:MF	cation binding	GO:0043169	0.00287942	2.5407	3990	1061	160	35134	VITVI07G00062,VITVI10G04259,VITVI10G00185,VITVI07G02881,VITVI07G02555,VITVI10G02176,VITVI10G04302,VITVI07G03083,VITVI07G03085,VITVI01G01374,VITVI01G00108,VITVI01G00162,VITVI01G00192,VITVI01G00199,VITVI01G00286,VITVI01G00523,VITVI01G01040,VITVI01G01729,VITVI02G00618,VITVI02G01473,VITVI02G00634,VITVI02G00724,VITVI02G00043,VITVI02G00048,VITVI02G00270,VITVI02G00283,VITVI02G00329,VITVI02G00377,VITVI02…
GO:MF	DNA binding	GO:0003677	0.00439572	2.35697	2277	1061	99	35134	VITVI07G00073,VITVI10G00380,VITVI10G04259,VITVI13G00239,VITVI01G01680,VITVI01G04062,VITVI01G00412,VITVI01G00427,VITVI01G00511,VITVI01G00545,VITVI02G00709,VITVI02G00089,VITVI02G00329,VITVI02G00411,VITVI03G00559,VITVI04G00523,VITVI04G01414,VITVI04G01714,VITVI04G00749,VITVI04G00824,VITVI05G00239,VITVI05G00245,VITVI05G00453,VITVI05G01723,VITVI05G01320,VITVI05G00166,VITVI06G04090,VITVI06G04095,VITVI06…
GO:MF	ubiquitin protein ligase activity	GO:0061630	0.00576035	2.23955	210	1061	17	35134	VITVI01G00192,VITVI01G00614,VITVI02G00384,VITVI03G00139,VITVI03G00519,VITVI04G00205,VITVI06G00501,VITVI06G00746,VITVI07G00484,VITVI07G01826,VITVI08G01201,VITVI13G00585,VITVI13G01483,VITVI14G01303,VITVI15G00842,VITVI17G00435,VITVI18G00546
GO:MF	ligase activity	GO:0016874	0.00587982	2.23064	335	1061	23	35134	VITVI01G00035,VITVI01G00614,VITVI02G00043,VITVI02G00188,VITVI02G00315,VITVI02G00326,VITVI03G00530,VITVI04G00890,VITVI05G01493,VITVI07G01826,VITVI08G01188,VITVI08G01201,VITVI08G01319,VITVI08G01873,VITVI09G00342,VITVI10G00055,VITVI11G01148,VITVI14G00648,VITVI14G02541,VITVI15G01648,VITVI18G00124,VITVI18G00368,VITVI19G01776
GO:MF	histone modifying activity	GO:0140993	0.00617368	2.20946	86	1061	10	35134	VITVI02G00759,VITVI02G00329,VITVI04G01714,VITVI05G02135,VITVI12G00328,VITVI14G01787,VITVI14G01462,VITVI18G00220,VITVI18G00251,VITVI18G02964
GO:MF	enzyme binding	GO:0019899	0.00628891	2.20142	233	1061	18	35134	VITVI10G04302,VITVI01G01413,VITVI01G00190,VITVI03G00180,VITVI06G00053,VITVI06G00393,VITVI08G00835,VITVI09G00619,VITVI13G01256,VITVI14G00668,VITVI14G01480,VITVI14G00254,VITVI15G01417,VITVI16G01510,VITVI16G01394,VITVI18G00250,VITVI18G00624,VITVI19G00434
GO:MF	small GTPase binding	GO:0031267	0.00629772	2.20082	31	1061	6	35134	VITVI01G00190,VITVI03G00180,VITVI06G00053,VITVI13G01256,VITVI14G00254,VITVI16G01394
GO:MF	protein-containing complex binding	GO:0044877	0.00696254	2.15723	364	1061	24	35134	VITVI01G00273,VITVI04G00523,VITVI04G00749,VITVI05G01655,VITVI05G02135,VITVI06G04090,VITVI06G00746,VITVI06G01262,VITVI07G00484,VITVI07G02048,VITVI08G01767,VITVI08G01924,VITVI08G00125,VITVI09G00162,VITVI11G00163,VITVI11G01212,VITVI12G00022,VITVI13G02031,VITVI14G02046,VITVI17G00376,VITVI17G01097,VITVI19G00402,VITVI19G01756,VITVI19G00575
GO:MF	metal ion binding	GO:0046872	0.00696254	2.15723	3964	1061	156	35134	VITVI07G00062,VITVI10G04259,VITVI10G00185,VITVI07G02881,VITVI07G02555,VITVI10G02176,VITVI07G03083,VITVI07G03085,VITVI01G01374,VITVI01G00108,VITVI01G00162,VITVI01G00192,VITVI01G00199,VITVI01G00286,VITVI01G00523,VITVI01G01040,VITVI01G01729,VITVI02G00618,VITVI02G01473,VITVI02G00634,VITVI02G00724,VITVI02G00043,VITVI02G00048,VITVI02G00270,VITVI02G00283,VITVI02G00329,VITVI02G00377,VITVI02G00395,VITVI02…
GO:MF	transferase activity, transferring one-carbon groups	GO:0016741	0.00744166	2.12833	550	1061	32	35134	VITVI15G04535,VITVI00G04705,VITVI01G01374,VITVI01G00286,VITVI01G00484,VITVI01G00836,VITVI01G00995,VITVI02G00759,VITVI02G00263,VITVI02G00289,VITVI02G00329,VITVI03G00308,VITVI04G00231,VITVI04G00550,VITVI05G02135,VITVI06G00008,VITVI06G00740,VITVI07G02048,VITVI08G01319,VITVI08G01767,VITVI11G00213,VITVI12G01868,VITVI12G02139,VITVI14G01462,VITVI14G00497,VITVI16G00554,VITVI18G00220,VITVI18G02763,VITVI18…
GO:MF	methyltransferase activity	GO:0008168	0.0086884	2.06106	532	1061	31	35134	VITVI15G04535,VITVI00G04705,VITVI01G01374,VITVI01G00286,VITVI01G00484,VITVI01G00836,VITVI01G00995,VITVI02G00759,VITVI02G00263,VITVI02G00289,VITVI02G00329,VITVI03G00308,VITVI04G00231,VITVI04G00550,VITVI05G02135,VITVI06G00008,VITVI06G00740,VITVI07G02048,VITVI08G01767,VITVI11G00213,VITVI12G01868,VITVI12G02139,VITVI14G01462,VITVI14G00497,VITVI16G00554,VITVI18G00220,VITVI18G02763,VITVI18G01103,VITVI18…
GO:MF	nucleic acid binding	GO:0003676	0.00880872	2.05509	5249	1061	198	35134	VITVI07G00073,VITVI10G00380,VITVI10G04259,VITVI14G02411,VITVI13G00239,VITVI01G01391,VITVI01G01680,VITVI01G00036,VITVI01G00060,VITVI01G00171,VITVI01G04062,VITVI01G00412,VITVI01G00427,VITVI01G00511,VITVI01G00523,VITVI01G00545,VITVI02G00654,VITVI02G00709,VITVI02G00089,VITVI02G00329,VITVI02G00411,VITVI02G01274,VITVI03G01011,VITVI03G01013,VITVI03G00107,VITVI03G00559,VITVI04G00045,VITVI04G00219,VITVI04…
GO:MF	S-adenosylmethionine-dependent methyltransferase activity	GO:0008757	0.01289	1.88975	232	1061	17	35134	VITVI01G00286,VITVI01G00484,VITVI01G00836,VITVI02G00263,VITVI03G00308,VITVI05G02135,VITVI06G00008,VITVI07G02048,VITVI08G01767,VITVI12G02139,VITVI14G01462,VITVI16G00554,VITVI18G00220,VITVI18G02763,VITVI18G01103,VITVI18G01948,VITVI18G02964
GO:MF	ATP-dependent activity, acting on RNA	GO:0008186	0.01289	1.88975	81	1061	9	35134	VITVI05G00872,VITVI06G00580,VITVI06G01070,VITVI07G00442,VITVI08G00301,VITVI11G00923,VITVI11G00979,VITVI14G01741,VITVI17G00262
GO:MF	chromatin binding	GO:0003682	0.01289	1.88975	170	1061	14	35134	VITVI01G00273,VITVI04G00523,VITVI04G00749,VITVI05G02135,VITVI06G04090,VITVI06G01262,VITVI07G02048,VITVI08G01767,VITVI11G00163,VITVI12G00022,VITVI14G02046,VITVI17G00376,VITVI19G01756,VITVI19G00575
GO:MF	RNA helicase activity	GO:0003724	0.01289	1.88975	81	1061	9	35134	VITVI05G00872,VITVI06G00580,VITVI06G01070,VITVI07G00442,VITVI08G00301,VITVI11G00923,VITVI11G00979,VITVI14G01741,VITVI17G00262
GO:MF	P-type ion transporter activity	GO:0015662	0.01289	1.88975	65	1061	8	35134	VITVI07G00071,VITVI01G00108,VITVI07G02013,VITVI08G02413,VITVI09G00189,VITVI11G01176,VITVI15G00567,VITVI18G00643
GO:MF	P-type transmembrane transporter activity	GO:0140358	0.01289	1.88975	65	1061	8	35134	VITVI07G00071,VITVI01G00108,VITVI07G02013,VITVI08G02413,VITVI09G00189,VITVI11G01176,VITVI15G00567,VITVI18G00643
GO:MF	allene-oxide cyclase activity	GO:0046423	0.0145942	1.83582	2	1061	2	35134	VITVI01G00246,VITVI14G01246
GO:MF	gamma-aminobutyric acid transmembrane transporter activity	GO:0015185	0.0145942	1.83582	2	1061	2	35134	VITVI01G00343,VITVI06G01396
GO:MF	ATP-dependent chromatin remodeler activity	GO:0140658	0.0145942	1.83582	52	1061	7	35134	VITVI04G00523,VITVI05G00453,VITVI06G04090,VITVI06G01262,VITVI10G00425,VITVI14G00743,VITVI15G00014
GO:MF	threonine synthase activity	GO:0004795	0.0145942	1.83582	2	1061	2	35134	VITVI04G01914,VITVI11G00130
GO:MF	GTPase activator activity	GO:0005096	0.0156459	1.8056	68	1061	8	35134	VITVI01G01418,VITVI01G01499,VITVI02G00699,VITVI05G00632,VITVI08G01171,VITVI11G01136,VITVI19G00290,VITVI19G00305
GO:MF	active transmembrane transporter activity	GO:0022804	0.0169785	1.7701	638	1061	34	35134	VITVI07G00071,VITVI07G04600,VITVI01G00108,VITVI01G00959,VITVI02G00403,VITVI04G01142,VITVI04G01225,VITVI05G00359,VITVI05G01655,VITVI06G01950,VITVI07G02013,VITVI08G01929,VITVI08G02413,VITVI08G00078,VITVI09G00189,VITVI09G00462,VITVI09G04152,VITVI10G00037,VITVI11G00419,VITVI11G01176,VITVI13G00252,VITVI13G01745,VITVI14G01062,VITVI14G00472,VITVI15G00567,VITVI16G01210,VITVI17G00044,VITVI17G00972,VITVI18…
GO:MF	histone H3 methyltransferase activity	GO:0140938	0.0169785	1.7701	16	1061	4	35134	VITVI05G02135,VITVI14G01462,VITVI18G00220,VITVI18G02964
GO:MF	organic anion transmembrane transporter activity	GO:0008514	0.0169785	1.7701	140	1061	12	35134	VITVI07G04600,VITVI01G00343,VITVI06G01331,VITVI06G01396,VITVI08G01364,VITVI08G00152,VITVI10G00902,VITVI10G00037,VITVI13G01745,VITVI14G01946,VITVI14G01951,VITVI14G00253
GO:MF	catalytic activity, acting on DNA	GO:0140097	0.0256625	1.5907	387	1061	23	35134	VITVI13G00239,VITVI04G00231,VITVI04G00523,VITVI04G00749,VITVI05G00453,VITVI05G01320,VITVI06G04090,VITVI06G01262,VITVI07G00307,VITVI07G02048,VITVI08G01767,VITVI10G00425,VITVI11G01148,VITVI13G01699,VITVI13G01759,VITVI13G00747,VITVI14G00743,VITVI15G00014,VITVI17G00701,VITVI17G00744,VITVI17G01000,VITVI18G00093,VITVI19G01624
GO:MF	protein-lysine N-methyltransferase activity	GO:0016279	0.0266653	1.57405	30	1061	5	35134	VITVI01G00484,VITVI05G02135,VITVI14G01462,VITVI18G00220,VITVI18G02964
GO:MF	lysine N-methyltransferase activity	GO:0016278	0.0266653	1.57405	30	1061	5	35134	VITVI01G00484,VITVI05G02135,VITVI14G01462,VITVI18G00220,VITVI18G02964
GO:MF	nucleoside-triphosphatase regulator activity	GO:0060589	0.0271978	1.56547	111	1061	10	35134	VITVI01G01418,VITVI01G01499,VITVI02G00699,VITVI05G00632,VITVI08G01171,VITVI11G00005,VITVI11G01136,VITVI15G00365,VITVI19G00290,VITVI19G00305
GO:MF	GTPase regulator activity	GO:0030695	0.0271978	1.56547	111	1061	10	35134	VITVI01G01418,VITVI01G01499,VITVI02G00699,VITVI05G00632,VITVI08G01171,VITVI11G00005,VITVI11G01136,VITVI15G00365,VITVI19G00290,VITVI19G00305
GO:MF	phosphatidylinositol monophosphate phosphatase activity	GO:0052744	0.0344259	1.46311	3	1061	2	35134	VITVI04G01565,VITVI13G00731
GO:MF	sucrose:proton symporter activity	GO:0008506	0.0344259	1.46311	3	1061	2	35134	VITVI01G00959,VITVI18G01315
GO:MF	DNA-binding transcription factor activity	GO:0003700	0.0344259	1.46311	1012	1061	47	35134	VITVI10G00380,VITVI01G01680,VITVI01G00412,VITVI01G00427,VITVI01G00511,VITVI01G00545,VITVI02G00709,VITVI02G00089,VITVI03G00559,VITVI04G01252,VITVI05G01723,VITVI05G00166,VITVI06G00491,VITVI06G01411,VITVI06G01480,VITVI07G00357,VITVI07G00434,VITVI07G02253,VITVI07G01874,VITVI07G02066,VITVI08G01513,VITVI10G00618,VITVI11G01153,VITVI11G00601,VITVI12G00348,VITVI12G00451,VITVI13G00529,VITVI04G04257,VITVI14…
GO:MF	sucrose:monoatomic cation symporter activity	GO:0009669	0.0344259	1.46311	3	1061	2	35134	VITVI01G00959,VITVI18G01315
GO:MF	hydrolase activity, acting on carbon-nitrogen (but not peptide) bonds	GO:0016810	0.0362397	1.44082	136	1061	11	35134	VITVI01G00103,VITVI01G02092,VITVI02G00188,VITVI04G01714,VITVI08G01311,VITVI08G00676,VITVI09G00220,VITVI11G01376,VITVI13G00055,VITVI18G00220,VITVI18G00251
GO:MF	transcription regulator activity	GO:0140110	0.0451444	1.3454	1166	1061	52	35134	VITVI10G00380,VITVI01G01413,VITVI01G01680,VITVI01G00412,VITVI01G00427,VITVI01G00511,VITVI01G00545,VITVI01G02098,VITVI02G00709,VITVI02G00089,VITVI03G00559,VITVI04G01252,VITVI05G00239,VITVI05G00496,VITVI05G01723,VITVI05G00166,VITVI06G00048,VITVI06G00491,VITVI06G01411,VITVI06G01480,VITVI07G00357,VITVI07G00434,VITVI07G02253,VITVI07G01874,VITVI07G02066,VITVI08G01513,VITVI10G00618,VITVI11G01153,VITVI11…
GO:MF	oxidoreductase activity, acting on NAD(P)H, oxygen as acceptor	GO:0050664	0.0452377	1.3445	11	1061	3	35134	VITVI02G00048,VITVI02G01182,VITVI14G00183
GO:MF	catalytic activity, acting on a protein	GO:0140096	0.0452377	1.3445	3362	1061	128	35134	VITVI04G04411,VITVI14G02411,VITVI10G02135,VITVI02G04129,VITVI01G01439,VITVI01G00038,VITVI01G00182,VITVI01G00192,VITVI01G04077,VITVI01G00484,VITVI01G00614,VITVI02G00617,VITVI02G00759,VITVI02G00043,VITVI02G00329,VITVI02G00380,VITVI02G00384,VITVI02G00442,VITVI03G00139,VITVI03G00284,VITVI03G00519,VITVI03G00514,VITVI03G00400,VITVI03G01597,VITVI03G00539,VITVI04G00205,VITVI04G01452,VITVI04G01677,VITVI04…
GO:MF	catalytic activity, acting on RNA	GO:0140098	0.0452377	1.3445	636	1061	32	35134	VITVI01G00836,VITVI02G01228,VITVI03G01011,VITVI03G00308,VITVI05G00421,VITVI05G00872,VITVI05G01493,VITVI06G00376,VITVI06G00580,VITVI06G01070,VITVI07G00442,VITVI08G00301,VITVI08G00120,VITVI10G00055,VITVI11G00234,VITVI11G00748,VITVI11G00923,VITVI11G00979,VITVI12G00313,VITVI12G02033,VITVI12G00414,VITVI13G01420,VITVI14G01741,VITVI15G00864,VITVI16G00554,VITVI17G00262,VITVI17G01124,VITVI18G00167,VITVI18…
GO:MF	ATPase-coupled transmembrane transporter activity	GO:0042626	0.0455487	1.34152	317	1061	19	35134	VITVI07G00071,VITVI01G00108,VITVI04G01142,VITVI06G01950,VITVI07G02013,VITVI08G01929,VITVI08G02413,VITVI09G00189,VITVI09G00462,VITVI09G04152,VITVI11G01176,VITVI13G00252,VITVI14G00472,VITVI15G00567,VITVI16G01210,VITVI17G00972,VITVI18G00230,VITVI18G00643,VITVI18G01058
GO:MF	aminoacyltransferase activity	GO:0016755	0.0476627	1.32182	390	1061	22	35134	VITVI01G00192,VITVI01G00614,VITVI02G00043,VITVI02G00384,VITVI03G00139,VITVI03G00519,VITVI04G00205,VITVI06G00501,VITVI06G00746,VITVI07G00484,VITVI07G01826,VITVI08G01201,VITVI08G00836,VITVI11G00234,VITVI11G00304,VITVI13G00585,VITVI13G01483,VITVI14G01303,VITVI15G01648,VITVI15G00842,VITVI17G00435,VITVI18G00546
GO:MF	organic acid transmembrane transporter activity	GO:0005342	0.048751	1.31202	104	1061	9	35134	VITVI07G04600,VITVI01G00343,VITVI06G01331,VITVI06G01396,VITVI08G00152,VITVI10G00902,VITVI10G00037,VITVI14G01946,VITVI14G01951
GO:MF	carboxylic acid transmembrane transporter activity	GO:0046943	0.048751	1.31202	104	1061	9	35134	VITVI07G04600,VITVI01G00343,VITVI06G01331,VITVI06G01396,VITVI08G00152,VITVI10G00902,VITVI10G00037,VITVI14G01946,VITVI14G01951
GO:BP	biological_process	GO:0008150	9.08e-23	22.0419	18606	1061	728	35134	VITVI10G01213,VITVI07G00073,VITVI07G00071,VITVI07G00062,VITVI10G00380,VITVI10G00383,VITVI10G00185,VITVI10G00336,VITVI07G02498,VITVI07G02896,VITVI10G00455,VITVI10G00399,VITVI04G04411,VITVI14G02411,VITVI13G00239,VITVI13G00238,VITVI07G02734,VITVI07G02555,VITVI10G02135,VITVI10G02343,VITVI07G04656,VITVI07G01345,VITVI02G01726,VITVI10G00385,VITVI04G02278,VITVI00G04508,VITVI10G00414,VITVI10G04302,VITVI07…
GO:BP	cellular process	GO:0009987	4.63e-18	17.3343	14813	1061	597	35134	VITVI10G01213,VITVI07G00073,VITVI07G00071,VITVI07G00062,VITVI10G00380,VITVI10G00383,VITVI10G00185,VITVI10G00336,VITVI07G02896,VITVI10G00455,VITVI04G04411,VITVI14G02411,VITVI13G00239,VITVI13G00238,VITVI07G02555,VITVI10G02135,VITVI10G02343,VITVI07G04656,VITVI07G01345,VITVI02G01726,VITVI10G00385,VITVI04G02278,VITVI10G00414,VITVI10G04302,VITVI07G03083,VITVI02G04129,VITVI07G04600,VITVI01G01362,VITVI01…
GO:BP	organic substance metabolic process	GO:0071704	1.84e-11	10.7344	12549	1061	497	35134	VITVI07G00073,VITVI07G00062,VITVI10G00380,VITVI10G00383,VITVI10G00185,VITVI07G02498,VITVI07G02896,VITVI10G00455,VITVI04G04411,VITVI14G02411,VITVI13G00239,VITVI13G00238,VITVI07G02555,VITVI10G02135,VITVI02G01726,VITVI00G04508,VITVI10G00414,VITVI10G04302,VITVI07G03083,VITVI15G04535,VITVI00G04705,VITVI00G04839,VITVI02G04129,VITVI01G01362,VITVI01G01374,VITVI01G01413,VITVI01G01439,VITVI01G01680,VITVI01…
GO:BP	biological regulation	GO:0065007	3.9e-11	10.4095	4388	1061	217	35134	VITVI10G00380,VITVI10G04302,VITVI01G01499,VITVI01G01680,VITVI01G00199,VITVI01G00412,VITVI01G00427,VITVI01G00511,VITVI01G00545,VITVI01G02092,VITVI01G02098,VITVI01G01040,VITVI02G00699,VITVI02G00709,VITVI02G00759,VITVI02G00048,VITVI02G00089,VITVI02G00329,VITVI02G00377,VITVI02G00380,VITVI03G01011,VITVI03G00400,VITVI03G00358,VITVI03G00570,VITVI03G00559,VITVI04G00115,VITVI04G00219,VITVI04G00513,VITVI04…
GO:BP	metabolic process	GO:0008152	1.03e-10	9.98623	13524	1061	523	35134	VITVI07G00073,VITVI07G00062,VITVI10G00380,VITVI10G00383,VITVI10G00185,VITVI10G00336,VITVI07G02498,VITVI07G02896,VITVI10G00455,VITVI10G00399,VITVI04G04411,VITVI14G02411,VITVI13G00239,VITVI13G00238,VITVI07G02555,VITVI10G02135,VITVI07G01345,VITVI02G01726,VITVI00G04508,VITVI10G00414,VITVI10G04302,VITVI07G03083,VITVI15G04535,VITVI00G04705,VITVI00G04839,VITVI02G04129,VITVI01G01362,VITVI01G01374,VITVI01…
GO:BP	primary metabolic process	GO:0044238	3.52e-09	8.45394	11731	1061	458	35134	VITVI07G00073,VITVI07G00062,VITVI10G00380,VITVI10G00383,VITVI10G00185,VITVI07G02498,VITVI07G02896,VITVI10G00455,VITVI04G04411,VITVI14G02411,VITVI13G00239,VITVI10G02135,VITVI02G01726,VITVI00G04508,VITVI10G00414,VITVI10G04302,VITVI15G04535,VITVI00G04705,VITVI00G04839,VITVI02G04129,VITVI01G01362,VITVI01G01413,VITVI01G01439,VITVI01G01680,VITVI01G00035,VITVI01G00038,VITVI01G00060,VITVI01G00163,VITVI01…
GO:BP	regulation of biological process	GO:0050789	8.41e-08	7.07518	4094	1061	192	35134	VITVI10G00380,VITVI01G01499,VITVI01G01680,VITVI01G00412,VITVI01G00427,VITVI01G00511,VITVI01G00545,VITVI01G02098,VITVI01G01040,VITVI02G00709,VITVI02G00759,VITVI02G00048,VITVI02G00089,VITVI02G00329,VITVI02G00380,VITVI03G01011,VITVI03G00400,VITVI03G00358,VITVI03G00570,VITVI03G00559,VITVI04G00115,VITVI04G00219,VITVI04G00513,VITVI04G00526,VITVI04G00550,VITVI04G01252,VITVI04G01452,VITVI04G01691,VITVI04…
GO:BP	localization	GO:0051179	1.21e-07	6.91728	2837	1061	144	35134	VITVI10G01213,VITVI07G00071,VITVI04G04411,VITVI10G02343,VITVI10G00385,VITVI04G02278,VITVI02G04129,VITVI07G04600,VITVI01G01411,VITVI01G00108,VITVI01G00190,VITVI01G00199,VITVI01G00343,VITVI01G00376,VITVI01G00523,VITVI01G00959,VITVI02G00617,VITVI02G00699,VITVI02G00048,VITVI02G00326,VITVI02G00403,VITVI02G00411,VITVI03G01316,VITVI03G00103,VITVI03G00180,VITVI04G01893,VITVI04G00526,VITVI04G01142,VITVI04…
GO:BP	cellular component organization	GO:0016043	1.34e-07	6.87305	2116	1061	115	35134	VITVI10G01213,VITVI10G00455,VITVI10G02343,VITVI07G04656,VITVI07G01345,VITVI10G00385,VITVI01G01374,VITVI01G01646,VITVI01G00060,VITVI01G00171,VITVI01G00199,VITVI01G00219,VITVI01G00273,VITVI01G00376,VITVI02G00617,VITVI02G00699,VITVI02G00759,VITVI02G00326,VITVI02G00327,VITVI02G00329,VITVI02G00553,VITVI03G00492,VITVI04G00519,VITVI04G00523,VITVI04G00526,VITVI04G00613,VITVI04G04396,VITVI04G01714,VITVI04…
GO:BP	transport	GO:0006810	1.34e-07	6.87305	2703	1061	138	35134	VITVI10G01213,VITVI07G00071,VITVI04G04411,VITVI10G02343,VITVI10G00385,VITVI04G02278,VITVI02G04129,VITVI07G04600,VITVI01G01411,VITVI01G00108,VITVI01G00190,VITVI01G00199,VITVI01G00343,VITVI01G00376,VITVI01G00523,VITVI01G00959,VITVI02G00617,VITVI02G00699,VITVI02G00403,VITVI02G00411,VITVI03G01316,VITVI03G00103,VITVI03G00180,VITVI04G01893,VITVI04G00526,VITVI04G01142,VITVI04G01225,VITVI04G04396,VITVI04…
GO:BP	regulation of cellular process	GO:0050794	1.34e-07	6.87305	3813	1061	180	35134	VITVI10G00380,VITVI01G01499,VITVI01G01680,VITVI01G00412,VITVI01G00427,VITVI01G00511,VITVI01G00545,VITVI01G02098,VITVI01G01040,VITVI02G00709,VITVI02G00759,VITVI02G00048,VITVI02G00089,VITVI02G00329,VITVI02G00380,VITVI03G01011,VITVI03G00400,VITVI03G00358,VITVI03G00559,VITVI04G00115,VITVI04G00513,VITVI04G00526,VITVI04G01252,VITVI04G01452,VITVI04G01691,VITVI04G01714,VITVI04G00824,VITVI05G00239,VITVI05…
GO:BP	establishment of localization	GO:0051234	1.34e-07	6.87305	2732	1061	139	35134	VITVI10G01213,VITVI07G00071,VITVI04G04411,VITVI10G02343,VITVI10G00385,VITVI04G02278,VITVI02G04129,VITVI07G04600,VITVI01G01411,VITVI01G00108,VITVI01G00190,VITVI01G00199,VITVI01G00343,VITVI01G00376,VITVI01G00523,VITVI01G00959,VITVI02G00617,VITVI02G00699,VITVI02G00403,VITVI02G00411,VITVI03G01316,VITVI03G00103,VITVI03G00180,VITVI04G01893,VITVI04G00526,VITVI04G01142,VITVI04G01225,VITVI04G04396,VITVI04…
GO:BP	cellular component organization or biogenesis	GO:0071840	1.34e-07	6.87305	2491	1061	130	35134	VITVI10G01213,VITVI10G00455,VITVI10G02343,VITVI07G04656,VITVI07G01345,VITVI10G00385,VITVI01G01374,VITVI01G01646,VITVI01G00060,VITVI01G00171,VITVI01G00199,VITVI01G00219,VITVI01G00273,VITVI01G00376,VITVI02G00617,VITVI02G00699,VITVI02G00759,VITVI02G00326,VITVI02G00327,VITVI02G00329,VITVI02G00553,VITVI03G00308,VITVI03G00492,VITVI04G00219,VITVI04G00231,VITVI04G00519,VITVI04G00523,VITVI04G00526,VITVI04…
GO:BP	organic substance transport	GO:0071702	2.34e-07	6.63083	1345	1061	82	35134	VITVI10G01213,VITVI07G00071,VITVI04G04411,VITVI10G02343,VITVI10G00385,VITVI04G02278,VITVI02G04129,VITVI07G04600,VITVI01G01411,VITVI01G00190,VITVI01G00199,VITVI01G00343,VITVI01G00376,VITVI01G00523,VITVI01G00959,VITVI02G00617,VITVI02G00411,VITVI03G01316,VITVI03G00103,VITVI03G00180,VITVI04G01893,VITVI04G00526,VITVI04G01142,VITVI04G01225,VITVI05G00210,VITVI05G00632,VITVI05G00085,VITVI06G00017,VITVI06…
GO:BP	cellular biosynthetic process	GO:0044249	2.64e-07	6.57916	6060	1061	258	35134	VITVI10G00380,VITVI10G00383,VITVI10G00185,VITVI07G02896,VITVI10G00455,VITVI04G04411,VITVI13G00239,VITVI13G00238,VITVI07G02555,VITVI10G00414,VITVI07G03083,VITVI02G04129,VITVI01G01413,VITVI01G01680,VITVI01G00035,VITVI01G00060,VITVI01G00163,VITVI01G00171,VITVI01G00178,VITVI01G04062,VITVI01G00246,VITVI01G00286,VITVI01G00412,VITVI01G00427,VITVI01G00511,VITVI01G00523,VITVI01G00545,VITVI01G02098,VITVI01…
GO:BP	organic substance biosynthetic process	GO:1901576	3.96e-07	6.40272	6177	1061	261	35134	VITVI10G00380,VITVI10G00383,VITVI10G00185,VITVI07G02896,VITVI10G00455,VITVI04G04411,VITVI13G00239,VITVI13G00238,VITVI07G02555,VITVI10G00414,VITVI07G03083,VITVI02G04129,VITVI01G01413,VITVI01G01680,VITVI01G00035,VITVI01G00060,VITVI01G00163,VITVI01G00171,VITVI01G00178,VITVI01G04062,VITVI01G00246,VITVI01G00286,VITVI01G00412,VITVI01G00427,VITVI01G00511,VITVI01G00523,VITVI01G00545,VITVI01G00793,VITVI01…
GO:BP	cellular metabolic process	GO:0044237	4.22e-07	6.37474	10831	1061	415	35134	VITVI07G00073,VITVI07G00062,VITVI10G00380,VITVI10G00383,VITVI10G00185,VITVI10G00336,VITVI07G02896,VITVI10G00455,VITVI04G04411,VITVI14G02411,VITVI13G00239,VITVI13G00238,VITVI07G02555,VITVI10G02135,VITVI07G01345,VITVI02G01726,VITVI10G00414,VITVI10G04302,VITVI07G03083,VITVI02G04129,VITVI01G01362,VITVI01G01374,VITVI01G01413,VITVI01G01439,VITVI01G01680,VITVI01G00035,VITVI01G00038,VITVI01G00056,VITVI01…
GO:BP	biosynthetic process	GO:0009058	5.35e-07	6.27137	6350	1061	266	35134	VITVI10G00380,VITVI10G00383,VITVI10G00185,VITVI07G02896,VITVI10G00455,VITVI04G04411,VITVI13G00239,VITVI13G00238,VITVI07G02555,VITVI10G00414,VITVI07G03083,VITVI02G04129,VITVI01G01413,VITVI01G01680,VITVI01G00035,VITVI01G00060,VITVI01G00163,VITVI01G00171,VITVI01G00178,VITVI01G04062,VITVI01G00246,VITVI01G00286,VITVI01G00412,VITVI01G00427,VITVI01G00511,VITVI01G00523,VITVI01G00545,VITVI01G00793,VITVI01…
GO:BP	reproductive process	GO:0022414	5.82e-07	6.23478	568	1061	45	35134	VITVI10G00455,VITVI01G01646,VITVI01G00836,VITVI02G00326,VITVI02G00551,VITVI03G00570,VITVI04G00749,VITVI04G00824,VITVI05G02135,VITVI06G00017,VITVI06G01268,VITVI06G01480,VITVI07G00307,VITVI07G00335,VITVI07G00343,VITVI07G02270,VITVI07G00217,VITVI07G00267,VITVI07G02013,VITVI09G00162,VITVI09G00430,VITVI09G00619,VITVI09G00816,VITVI09G01300,VITVI10G00497,VITVI10G00055,VITVI11G00495,VITVI11G00688,VITVI12…
GO:BP	macromolecule localization	GO:0033036	7.33e-07	6.13474	932	1061	62	35134	VITVI10G01213,VITVI04G04411,VITVI10G02343,VITVI10G00385,VITVI04G02278,VITVI02G04129,VITVI01G01411,VITVI01G00190,VITVI01G00199,VITVI01G00376,VITVI01G00523,VITVI02G00617,VITVI02G00048,VITVI02G00326,VITVI02G00411,VITVI03G01316,VITVI03G00103,VITVI03G00180,VITVI04G01893,VITVI04G00526,VITVI04G01142,VITVI05G00210,VITVI05G00632,VITVI05G00085,VITVI06G00017,VITVI06G00053,VITVI06G00340,VITVI06G00397,VITVI06…
GO:BP	reproduction	GO:0000003	8.05e-07	6.09404	576	1061	45	35134	VITVI10G00455,VITVI01G01646,VITVI01G00836,VITVI02G00326,VITVI02G00551,VITVI03G00570,VITVI04G00749,VITVI04G00824,VITVI05G02135,VITVI06G00017,VITVI06G01268,VITVI06G01480,VITVI07G00307,VITVI07G00335,VITVI07G00343,VITVI07G02270,VITVI07G00217,VITVI07G00267,VITVI07G02013,VITVI09G00162,VITVI09G00430,VITVI09G00619,VITVI09G00816,VITVI09G01300,VITVI10G00497,VITVI10G00055,VITVI11G00495,VITVI11G00688,VITVI12…
GO:BP	developmental process	GO:0032502	1.01139e-06	5.99508	1146	1061	71	35134	VITVI10G00455,VITVI01G01646,VITVI01G01680,VITVI01G00427,VITVI01G00836,VITVI02G00617,VITVI02G00326,VITVI02G00377,VITVI02G00551,VITVI03G00139,VITVI03G00492,VITVI03G00570,VITVI04G01714,VITVI04G00824,VITVI05G00287,VITVI05G00469,VITVI05G00164,VITVI05G00106,VITVI05G02135,VITVI06G00017,VITVI06G00113,VITVI06G04095,VITVI06G01268,VITVI06G01480,VITVI07G00307,VITVI07G00343,VITVI07G00496,VITVI07G00217,VITVI07…
GO:BP	cellular response to stimulus	GO:0051716	1.04424e-06	5.9812	2121	1061	111	35134	VITVI07G00073,VITVI13G00239,VITVI10G04302,VITVI01G01499,VITVI01G01680,VITVI01G00511,VITVI01G00793,VITVI02G00634,VITVI02G00048,VITVI02G00326,VITVI02G00380,VITVI02G00411,VITVI03G00530,VITVI03G00358,VITVI04G00115,VITVI04G00231,VITVI04G01252,VITVI04G01452,VITVI04G01691,VITVI04G00824,VITVI05G00408,VITVI05G01723,VITVI05G00764,VITVI05G01314,VITVI05G01320,VITVI05G01493,VITVI06G00775,VITVI06G00993,VITVI06…
GO:BP	post-embryonic development	GO:0009791	1.07282e-06	5.96947	485	1061	40	35134	VITVI10G00455,VITVI01G01680,VITVI01G00836,VITVI02G00617,VITVI02G00326,VITVI02G00551,VITVI03G00570,VITVI04G00824,VITVI05G00164,VITVI05G02135,VITVI06G00017,VITVI06G01268,VITVI06G01480,VITVI07G00307,VITVI07G00496,VITVI07G00217,VITVI07G00267,VITVI09G00162,VITVI09G00430,VITVI09G00619,VITVI09G00816,VITVI10G00497,VITVI10G00055,VITVI11G00495,VITVI12G02128,VITVI13G00573,VITVI13G00659,VITVI14G04618,VITVI14…
GO:BP	macromolecule metabolic process	GO:0043170	1.23771e-06	5.90738	9741	1061	376	35134	VITVI07G00073,VITVI10G00380,VITVI10G00185,VITVI10G00455,VITVI04G04411,VITVI14G02411,VITVI13G00239,VITVI10G02135,VITVI00G04508,VITVI10G04302,VITVI15G04535,VITVI00G04705,VITVI00G04839,VITVI02G04129,VITVI01G01413,VITVI01G01439,VITVI01G01680,VITVI01G00038,VITVI01G00060,VITVI01G00163,VITVI01G00171,VITVI01G00182,VITVI01G00192,VITVI01G04062,VITVI01G04077,VITVI01G00376,VITVI01G00412,VITVI01G00427,VITVI01…
GO:BP	developmental process involved in reproduction	GO:0003006	2.49348e-06	5.60319	443	1061	37	35134	VITVI10G00455,VITVI01G01646,VITVI01G00836,VITVI02G00326,VITVI02G00551,VITVI03G00570,VITVI04G00824,VITVI05G02135,VITVI06G00017,VITVI06G01268,VITVI06G01480,VITVI07G00307,VITVI07G00343,VITVI07G00217,VITVI07G00267,VITVI09G00162,VITVI09G00430,VITVI09G00619,VITVI09G00816,VITVI10G00497,VITVI10G00055,VITVI11G00495,VITVI11G00688,VITVI12G02128,VITVI13G00573,VITVI13G00659,VITVI14G04618,VITVI14G01787,VITVI14…
GO:BP	intracellular transport	GO:0046907	4.16336e-06	5.38056	700	1061	49	35134	VITVI10G01213,VITVI04G04411,VITVI10G02343,VITVI10G00385,VITVI04G02278,VITVI02G04129,VITVI07G04600,VITVI01G00190,VITVI01G00376,VITVI01G00523,VITVI02G00617,VITVI02G00411,VITVI03G01316,VITVI03G00103,VITVI03G00180,VITVI04G01893,VITVI04G00526,VITVI05G00210,VITVI05G00632,VITVI05G01120,VITVI05G00085,VITVI06G00017,VITVI06G00053,VITVI06G01268,VITVI06G04416,VITVI06G01364,VITVI07G00343,VITVI07G00603,VITVI07…
GO:BP	multicellular organism development	GO:0007275	4.16336e-06	5.38056	851	1061	56	35134	VITVI10G00455,VITVI01G01646,VITVI01G01680,VITVI01G00427,VITVI01G00836,VITVI02G00617,VITVI02G00326,VITVI02G00377,VITVI02G00551,VITVI03G00492,VITVI03G00570,VITVI04G01714,VITVI04G00824,VITVI05G00164,VITVI05G02135,VITVI06G00017,VITVI06G01268,VITVI06G01480,VITVI07G00307,VITVI07G00496,VITVI07G00217,VITVI07G00267,VITVI07G02013,VITVI08G01270,VITVI08G01323,VITVI09G00162,VITVI09G00430,VITVI09G00619,VITVI09…
GO:BP	nitrogen compound metabolic process	GO:0006807	4.16336e-06	5.38056	10133	1061	385	35134	VITVI07G00073,VITVI07G00062,VITVI10G00380,VITVI10G00383,VITVI10G00185,VITVI04G04411,VITVI14G02411,VITVI13G00239,VITVI10G02135,VITVI00G04508,VITVI10G00414,VITVI10G04302,VITVI00G04839,VITVI02G04129,VITVI01G01362,VITVI01G01413,VITVI01G01439,VITVI01G01680,VITVI01G00035,VITVI01G00038,VITVI01G00060,VITVI01G00163,VITVI01G00171,VITVI01G00182,VITVI01G00192,VITVI01G04062,VITVI01G00286,VITVI01G04077,VITVI01…
GO:BP	anatomical structure development	GO:0048856	4.57215e-06	5.33988	1037	1061	64	35134	VITVI10G00455,VITVI01G01646,VITVI01G01680,VITVI01G00427,VITVI01G00836,VITVI02G00617,VITVI02G00326,VITVI02G00377,VITVI02G00551,VITVI03G00139,VITVI03G00492,VITVI03G00570,VITVI04G01714,VITVI04G00824,VITVI05G00287,VITVI05G00164,VITVI05G00106,VITVI05G02135,VITVI06G00017,VITVI06G00113,VITVI06G01268,VITVI06G01480,VITVI07G00307,VITVI07G00343,VITVI07G00496,VITVI07G00217,VITVI07G00267,VITVI07G02013,VITVI08…
GO:BP	establishment of localization in cell	GO:0051649	5.36119e-06	5.27074	729	1061	50	35134	VITVI10G01213,VITVI04G04411,VITVI10G02343,VITVI10G00385,VITVI04G02278,VITVI02G04129,VITVI07G04600,VITVI01G00190,VITVI01G00376,VITVI01G00523,VITVI02G00617,VITVI02G00699,VITVI02G00411,VITVI03G01316,VITVI03G00103,VITVI03G00180,VITVI04G01893,VITVI04G00526,VITVI05G00210,VITVI05G00632,VITVI05G01120,VITVI05G00085,VITVI06G00017,VITVI06G00053,VITVI06G01268,VITVI06G04416,VITVI06G01364,VITVI07G00343,VITVI07…
GO:BP	reproductive structure development	GO:0048608	7.71735e-06	5.11253	389	1061	33	35134	VITVI10G00455,VITVI01G00836,VITVI02G00326,VITVI02G00551,VITVI03G00570,VITVI04G00824,VITVI05G02135,VITVI06G00017,VITVI06G01268,VITVI06G01480,VITVI07G00307,VITVI07G00217,VITVI07G00267,VITVI09G00162,VITVI09G00430,VITVI09G00619,VITVI09G00816,VITVI10G00497,VITVI10G00055,VITVI11G00495,VITVI12G02128,VITVI13G00573,VITVI13G00659,VITVI14G04618,VITVI14G01787,VITVI14G01480,VITVI14G01330,VITVI14G02046,VITVI15…
GO:BP	reproductive system development	GO:0061458	9.48699e-06	5.02287	393	1061	33	35134	VITVI10G00455,VITVI01G00836,VITVI02G00326,VITVI02G00551,VITVI03G00570,VITVI04G00824,VITVI05G02135,VITVI06G00017,VITVI06G01268,VITVI06G01480,VITVI07G00307,VITVI07G00217,VITVI07G00267,VITVI09G00162,VITVI09G00430,VITVI09G00619,VITVI09G00816,VITVI10G00497,VITVI10G00055,VITVI11G00495,VITVI12G02128,VITVI13G00573,VITVI13G00659,VITVI14G04618,VITVI14G01787,VITVI14G01480,VITVI14G01330,VITVI14G02046,VITVI15…
GO:BP	negative regulation of cellular biosynthetic process	GO:0031327	1.05497e-05	4.97676	358	1061	31	35134	VITVI01G01680,VITVI01G02098,VITVI03G01011,VITVI03G00400,VITVI05G00496,VITVI06G04090,VITVI06G00477,VITVI06G00580,VITVI06G01268,VITVI07G00307,VITVI07G00217,VITVI07G01634,VITVI07G02048,VITVI08G01645,VITVI08G01767,VITVI08G00120,VITVI08G00644,VITVI10G00497,VITVI12G01868,VITVI12G00414,VITVI13G00573,VITVI14G04618,VITVI14G01394,VITVI14G01480,VITVI15G00637,VITVI15G00864,VITVI16G00625,VITVI17G00153,VITVI17…
GO:BP	multicellular organismal process	GO:0032501	1.05497e-05	4.97676	928	1061	58	35134	VITVI10G00455,VITVI01G01646,VITVI01G01680,VITVI01G00427,VITVI01G00836,VITVI02G00617,VITVI02G00326,VITVI02G00377,VITVI02G00551,VITVI03G00492,VITVI03G00570,VITVI04G01714,VITVI04G00824,VITVI05G00164,VITVI05G02135,VITVI06G00017,VITVI06G01268,VITVI06G01480,VITVI07G00307,VITVI07G00343,VITVI07G00496,VITVI07G00217,VITVI07G00267,VITVI07G02013,VITVI08G01270,VITVI08G01323,VITVI09G00162,VITVI09G00430,VITVI09…
GO:BP	cell communication	GO:0007154	1.05497e-05	4.97676	1329	1061	75	35134	VITVI10G04302,VITVI01G01499,VITVI02G00048,VITVI02G00380,VITVI03G00358,VITVI04G00115,VITVI04G01252,VITVI04G01691,VITVI04G00824,VITVI05G01723,VITVI05G00764,VITVI05G01314,VITVI05G01320,VITVI06G00775,VITVI06G00993,VITVI06G01268,VITVI06G01364,VITVI06G01480,VITVI06G01526,VITVI07G00343,VITVI07G00357,VITVI07G02290,VITVI07G00745,VITVI07G01874,VITVI07G01989,VITVI07G00217,VITVI07G02013,VITVI08G01255,VITVI08…
GO:BP	system development	GO:0048731	1.08134e-05	4.96604	642	1061	45	35134	VITVI10G00455,VITVI01G01680,VITVI01G00427,VITVI01G00836,VITVI02G00617,VITVI02G00326,VITVI02G00551,VITVI03G00492,VITVI03G00570,VITVI04G01714,VITVI04G00824,VITVI05G02135,VITVI06G00017,VITVI06G01268,VITVI06G01480,VITVI07G00307,VITVI07G00496,VITVI07G00217,VITVI07G00267,VITVI08G01270,VITVI09G00162,VITVI09G00430,VITVI09G00619,VITVI09G00816,VITVI10G00497,VITVI10G00055,VITVI11G00495,VITVI12G02128,VITVI13…
GO:BP	negative regulation of biosynthetic process	GO:0009890	1.18844e-05	4.92502	361	1061	31	35134	VITVI01G01680,VITVI01G02098,VITVI03G01011,VITVI03G00400,VITVI05G00496,VITVI06G04090,VITVI06G00477,VITVI06G00580,VITVI06G01268,VITVI07G00307,VITVI07G00217,VITVI07G01634,VITVI07G02048,VITVI08G01645,VITVI08G01767,VITVI08G00120,VITVI08G00644,VITVI10G00497,VITVI12G01868,VITVI12G00414,VITVI13G00573,VITVI14G04618,VITVI14G01394,VITVI14G01480,VITVI15G00637,VITVI15G00864,VITVI16G00625,VITVI17G00153,VITVI17…
GO:BP	organic cyclic compound metabolic process	GO:1901360	1.56073e-05	4.80667	5789	1061	237	35134	VITVI07G00073,VITVI10G00380,VITVI10G00185,VITVI14G02411,VITVI13G00239,VITVI13G00238,VITVI07G02555,VITVI07G03083,VITVI01G01362,VITVI01G01413,VITVI01G01680,VITVI01G04062,VITVI01G00412,VITVI01G00427,VITVI01G00511,VITVI01G00523,VITVI01G00545,VITVI01G00836,VITVI01G02098,VITVI01G01040,VITVI02G00654,VITVI02G00709,VITVI02G00759,VITVI02G00089,VITVI02G00188,VITVI02G00283,VITVI02G00315,VITVI02G00326,VITVI02…
GO:BP	nitrogen compound transport	GO:0071705	1.70051e-05	4.76942	1038	1061	62	35134	VITVI10G01213,VITVI04G04411,VITVI10G02343,VITVI10G00385,VITVI04G02278,VITVI02G04129,VITVI07G04600,VITVI01G00190,VITVI01G00343,VITVI01G00376,VITVI01G00523,VITVI02G00617,VITVI02G00411,VITVI03G01316,VITVI03G00103,VITVI03G00180,VITVI04G01893,VITVI04G00526,VITVI05G00210,VITVI05G00632,VITVI05G00085,VITVI06G00017,VITVI06G00053,VITVI06G00397,VITVI06G04319,VITVI06G01268,VITVI06G01331,VITVI06G04416,VITVI06…
GO:BP	gene expression	GO:0010467	2.21906e-05	4.65383	4257	1061	183	35134	VITVI10G00380,VITVI10G00185,VITVI01G01413,VITVI01G01680,VITVI01G00060,VITVI01G00163,VITVI01G00171,VITVI01G04062,VITVI01G00412,VITVI01G00427,VITVI01G00511,VITVI01G00523,VITVI01G00545,VITVI01G02098,VITVI01G01040,VITVI02G00617,VITVI02G00709,VITVI02G00759,VITVI02G00089,VITVI02G00329,VITVI02G00380,VITVI03G01011,VITVI03G00107,VITVI03G00308,VITVI03G00400,VITVI03G00559,VITVI04G00231,VITVI04G00513,VITVI04…
GO:BP	chromatin remodeling	GO:0006338	2.3042e-05	4.63748	245	1061	24	35134	VITVI02G00759,VITVI02G00329,VITVI04G00523,VITVI04G01714,VITVI05G00453,VITVI05G02135,VITVI06G04090,VITVI06G00477,VITVI06G01262,VITVI07G02048,VITVI08G01767,VITVI10G00425,VITVI11G00163,VITVI11G00367,VITVI12G00328,VITVI14G00743,VITVI14G01787,VITVI14G01462,VITVI15G00014,VITVI18G00220,VITVI18G00251,VITVI18G02964,VITVI19G01624,VITVI19G01756
GO:BP	cellular localization	GO:0051641	2.3042e-05	4.63748	979	1061	59	35134	VITVI10G01213,VITVI04G04411,VITVI10G02343,VITVI10G00385,VITVI04G02278,VITVI02G04129,VITVI07G04600,VITVI01G00190,VITVI01G00376,VITVI01G00523,VITVI02G00617,VITVI02G00699,VITVI02G00326,VITVI02G00411,VITVI03G01316,VITVI03G00103,VITVI03G00180,VITVI04G01893,VITVI04G00526,VITVI05G00210,VITVI05G00632,VITVI05G01120,VITVI05G00085,VITVI06G00017,VITVI06G00053,VITVI06G00397,VITVI06G01268,VITVI06G04416,VITVI06…
GO:BP	regulation of cellular biosynthetic process	GO:0031326	2.49604e-05	4.60275	2393	1061	115	35134	VITVI10G00380,VITVI01G01680,VITVI01G00412,VITVI01G00427,VITVI01G00511,VITVI01G00545,VITVI01G02098,VITVI01G01040,VITVI02G00709,VITVI02G00759,VITVI02G00089,VITVI02G00329,VITVI02G00380,VITVI03G01011,VITVI03G00400,VITVI03G00559,VITVI04G00513,VITVI04G01252,VITVI04G01452,VITVI04G01714,VITVI04G00824,VITVI05G00239,VITVI05G00453,VITVI05G00496,VITVI05G01723,VITVI05G01344,VITVI05G00166,VITVI05G00106,VITVI05…
GO:BP	regulation of cellular metabolic process	GO:0031323	2.61326e-05	4.58282	2637	1061	124	35134	VITVI10G00380,VITVI01G01680,VITVI01G00412,VITVI01G00427,VITVI01G00511,VITVI01G00545,VITVI01G02098,VITVI01G01040,VITVI02G00709,VITVI02G00759,VITVI02G00089,VITVI02G00329,VITVI02G00380,VITVI03G01011,VITVI03G00400,VITVI03G00559,VITVI04G00513,VITVI04G01252,VITVI04G01452,VITVI04G01714,VITVI04G00824,VITVI05G00239,VITVI05G00453,VITVI05G00496,VITVI05G01723,VITVI05G01344,VITVI05G00166,VITVI05G00106,VITVI05…
GO:BP	regulation of biosynthetic process	GO:0009889	2.69967e-05	4.56869	2399	1061	115	35134	VITVI10G00380,VITVI01G01680,VITVI01G00412,VITVI01G00427,VITVI01G00511,VITVI01G00545,VITVI01G02098,VITVI01G01040,VITVI02G00709,VITVI02G00759,VITVI02G00089,VITVI02G00329,VITVI02G00380,VITVI03G01011,VITVI03G00400,VITVI03G00559,VITVI04G00513,VITVI04G01252,VITVI04G01452,VITVI04G01714,VITVI04G00824,VITVI05G00239,VITVI05G00453,VITVI05G00496,VITVI05G01723,VITVI05G01344,VITVI05G00166,VITVI05G00106,VITVI05…
GO:BP	nucleocytoplasmic transport	GO:0006913	2.9956e-05	4.52352	150	1061	18	35134	VITVI01G00190,VITVI01G00523,VITVI03G01316,VITVI03G00103,VITVI03G00180,VITVI04G01893,VITVI06G00017,VITVI06G00053,VITVI06G01268,VITVI08G01946,VITVI09G00061,VITVI09G00816,VITVI13G01256,VITVI14G01871,VITVI14G01418,VITVI14G01330,VITVI16G01394,VITVI19G01763
GO:BP	nuclear transport	GO:0051169	3.21091e-05	4.49337	151	1061	18	35134	VITVI01G00190,VITVI01G00523,VITVI03G01316,VITVI03G00103,VITVI03G00180,VITVI04G01893,VITVI06G00017,VITVI06G00053,VITVI06G01268,VITVI08G01946,VITVI09G00061,VITVI09G00816,VITVI13G01256,VITVI14G01871,VITVI14G01418,VITVI14G01330,VITVI16G01394,VITVI19G01763
GO:BP	macromolecule biosynthetic process	GO:0009059	3.21091e-05	4.49337	4838	1061	202	35134	VITVI10G00380,VITVI10G00185,VITVI10G00455,VITVI04G04411,VITVI02G04129,VITVI01G01413,VITVI01G01680,VITVI01G00060,VITVI01G00163,VITVI01G00171,VITVI01G04062,VITVI01G00412,VITVI01G00427,VITVI01G00511,VITVI01G00523,VITVI01G00545,VITVI01G02098,VITVI01G01040,VITVI02G00617,VITVI02G00709,VITVI02G00759,VITVI02G00089,VITVI02G00329,VITVI02G00380,VITVI03G01011,VITVI03G00107,VITVI03G00308,VITVI03G00535,VITVI03…
GO:BP	cellular macromolecule localization	GO:0070727	3.25494e-05	4.48746	742	1061	48	35134	VITVI10G01213,VITVI04G04411,VITVI10G02343,VITVI10G00385,VITVI04G02278,VITVI02G04129,VITVI01G00190,VITVI01G00376,VITVI02G00617,VITVI02G00326,VITVI02G00411,VITVI03G00103,VITVI03G00180,VITVI04G01893,VITVI04G00526,VITVI05G00210,VITVI05G00632,VITVI05G00085,VITVI06G00053,VITVI06G00397,VITVI06G04416,VITVI06G01364,VITVI06G01521,VITVI07G00343,VITVI07G00603,VITVI07G01688,VITVI07G04496,VITVI08G01946,VITVI08…
GO:BP	regulation of metabolic process	GO:0019222	3.6468e-05	4.43809	2742	1061	127	35134	VITVI10G00380,VITVI01G01680,VITVI01G00412,VITVI01G00427,VITVI01G00511,VITVI01G00545,VITVI01G02098,VITVI01G01040,VITVI02G00709,VITVI02G00759,VITVI02G00089,VITVI02G00329,VITVI02G00380,VITVI03G01011,VITVI03G00400,VITVI03G00559,VITVI04G00219,VITVI04G00513,VITVI04G00550,VITVI04G01252,VITVI04G01452,VITVI04G01714,VITVI04G00824,VITVI05G00239,VITVI05G00453,VITVI05G00496,VITVI05G01723,VITVI05G01344,VITVI05…
GO:BP	negative regulation of macromolecule biosynthetic process	GO:0010558	4.12965e-05	4.38409	349	1061	29	35134	VITVI01G01680,VITVI01G02098,VITVI03G01011,VITVI03G00400,VITVI05G00496,VITVI06G04090,VITVI06G00477,VITVI06G00580,VITVI06G01268,VITVI07G00307,VITVI07G00217,VITVI07G01634,VITVI07G02048,VITVI08G01645,VITVI08G01767,VITVI08G00120,VITVI08G00644,VITVI10G00497,VITVI12G01868,VITVI12G00414,VITVI13G00573,VITVI14G04618,VITVI14G01394,VITVI15G00637,VITVI15G00864,VITVI16G00625,VITVI17G00153,VITVI17G00987,VITVI18…
GO:BP	nucleobase-containing compound metabolic process	GO:0006139	4.18995e-05	4.37779	5272	1061	216	35134	VITVI07G00073,VITVI10G00380,VITVI14G02411,VITVI13G00239,VITVI01G01362,VITVI01G01413,VITVI01G01680,VITVI01G04062,VITVI01G00412,VITVI01G00427,VITVI01G00511,VITVI01G00523,VITVI01G00545,VITVI01G00836,VITVI01G02098,VITVI01G01040,VITVI02G00654,VITVI02G00709,VITVI02G00759,VITVI02G00089,VITVI02G00188,VITVI02G00315,VITVI02G00329,VITVI02G00380,VITVI02G00411,VITVI02G01274,VITVI03G00139,VITVI03G00308,VITVI03…
GO:BP	cellular aromatic compound metabolic process	GO:0006725	4.18995e-05	4.37779	5710	1061	231	35134	VITVI07G00073,VITVI10G00380,VITVI10G00185,VITVI14G02411,VITVI13G00239,VITVI13G00238,VITVI07G02555,VITVI07G03083,VITVI01G01362,VITVI01G01413,VITVI01G01680,VITVI01G04062,VITVI01G00412,VITVI01G00427,VITVI01G00511,VITVI01G00523,VITVI01G00545,VITVI01G00836,VITVI01G02098,VITVI01G01040,VITVI02G00654,VITVI02G00709,VITVI02G00759,VITVI02G00089,VITVI02G00188,VITVI02G00263,VITVI02G00283,VITVI02G00315,VITVI02…
GO:BP	regulation of macromolecule biosynthetic process	GO:0010556	4.18995e-05	4.37779	2376	1061	113	35134	VITVI10G00380,VITVI01G01680,VITVI01G00412,VITVI01G00427,VITVI01G00511,VITVI01G00545,VITVI01G02098,VITVI01G01040,VITVI02G00709,VITVI02G00759,VITVI02G00089,VITVI02G00329,VITVI02G00380,VITVI03G01011,VITVI03G00400,VITVI03G00559,VITVI04G00513,VITVI04G01252,VITVI04G01452,VITVI04G01714,VITVI04G00824,VITVI05G00239,VITVI05G00453,VITVI05G00496,VITVI05G01723,VITVI05G01344,VITVI05G00166,VITVI05G00106,VITVI05…
GO:BP	response to stimulus	GO:0050896	4.45002e-05	4.35164	4152	1061	177	35134	VITVI07G00073,VITVI13G00239,VITVI07G02734,VITVI10G04302,VITVI01G01499,VITVI01G02224,VITVI01G01680,VITVI01G00474,VITVI01G00511,VITVI01G00793,VITVI01G00836,VITVI01G00959,VITVI01G01040,VITVI02G00634,VITVI02G00048,VITVI02G00326,VITVI02G00380,VITVI02G00403,VITVI02G00411,VITVI02G00551,VITVI03G01173,VITVI03G01856,VITVI03G01011,VITVI03G00148,VITVI03G01481,VITVI03G00530,VITVI03G00492,VITVI03G00358,VITVI03…
GO:BP	regulation of gene expression	GO:0010468	4.47126e-05	4.34957	2328	1061	111	35134	VITVI10G00380,VITVI01G01680,VITVI01G00412,VITVI01G00427,VITVI01G00511,VITVI01G00545,VITVI01G02098,VITVI01G01040,VITVI02G00709,VITVI02G00759,VITVI02G00089,VITVI02G00329,VITVI02G00380,VITVI03G01011,VITVI03G00400,VITVI03G00559,VITVI04G00513,VITVI04G01252,VITVI04G01452,VITVI04G01714,VITVI04G00824,VITVI05G00239,VITVI05G00453,VITVI05G00496,VITVI05G01723,VITVI05G01344,VITVI05G00166,VITVI05G00106,VITVI05…
GO:BP	protein-DNA complex organization	GO:0071824	5.65336e-05	4.24769	337	1061	28	35134	VITVI01G00273,VITVI02G00759,VITVI02G00329,VITVI04G00523,VITVI04G01714,VITVI05G00453,VITVI05G02135,VITVI06G04090,VITVI06G00477,VITVI06G01262,VITVI07G02048,VITVI08G01767,VITVI10G00425,VITVI11G00163,VITVI11G00367,VITVI11G01319,VITVI12G00328,VITVI12G00022,VITVI14G00743,VITVI14G01787,VITVI14G01462,VITVI14G02046,VITVI15G00014,VITVI18G00220,VITVI18G00251,VITVI18G02964,VITVI19G01624,VITVI19G01756
GO:BP	protein localization	GO:0008104	5.71159e-05	4.24324	739	1061	47	35134	VITVI10G01213,VITVI04G04411,VITVI10G02343,VITVI10G00385,VITVI04G02278,VITVI02G04129,VITVI01G00190,VITVI01G00376,VITVI02G00617,VITVI02G00411,VITVI03G00103,VITVI03G00180,VITVI04G01893,VITVI04G00526,VITVI05G00210,VITVI05G00632,VITVI05G00085,VITVI06G00053,VITVI06G00397,VITVI06G04416,VITVI06G01364,VITVI06G01521,VITVI07G00343,VITVI07G00603,VITVI07G01688,VITVI07G04496,VITVI08G01946,VITVI08G00187,VITVI09…
GO:BP	negative regulation of cellular process	GO:0048523	6.60162e-05	4.18035	545	1061	38	35134	VITVI01G01680,VITVI01G02098,VITVI02G00048,VITVI03G01011,VITVI03G00400,VITVI05G00496,VITVI06G04090,VITVI06G00477,VITVI06G00580,VITVI06G01268,VITVI07G00307,VITVI07G00217,VITVI07G01634,VITVI07G02048,VITVI08G01645,VITVI08G01767,VITVI08G01787,VITVI08G01924,VITVI08G00120,VITVI08G00644,VITVI09G01621,VITVI09G00427,VITVI10G00497,VITVI11G01212,VITVI12G01868,VITVI12G00414,VITVI13G00573,VITVI14G04618,VITVI14…
GO:BP	negative regulation of cellular metabolic process	GO:0031324	7.74954e-05	4.11072	403	1061	31	35134	VITVI01G01680,VITVI01G02098,VITVI03G01011,VITVI03G00400,VITVI05G00496,VITVI06G04090,VITVI06G00477,VITVI06G00580,VITVI06G01268,VITVI07G00307,VITVI07G00217,VITVI07G01634,VITVI07G02048,VITVI08G01645,VITVI08G01767,VITVI08G00120,VITVI08G00644,VITVI10G00497,VITVI12G01868,VITVI12G00414,VITVI13G00573,VITVI14G04618,VITVI14G01394,VITVI14G01480,VITVI15G00637,VITVI15G00864,VITVI16G00625,VITVI17G00153,VITVI17…
GO:BP	establishment of protein localization to organelle	GO:0072594	9.11956e-05	4.04003	216	1061	21	35134	VITVI10G01213,VITVI04G02278,VITVI01G00190,VITVI01G00376,VITVI02G00617,VITVI03G00180,VITVI05G00210,VITVI06G00053,VITVI06G01364,VITVI07G00603,VITVI07G04496,VITVI08G01946,VITVI09G00061,VITVI11G01106,VITVI14G00472,VITVI14G01871,VITVI14G01418,VITVI14G02046,VITVI15G00009,VITVI16G01394,VITVI19G01763
GO:BP	catabolic process	GO:0009056	9.11956e-05	4.04003	1556	1061	80	35134	VITVI07G00062,VITVI10G00185,VITVI07G01345,VITVI02G01726,VITVI00G04508,VITVI01G01362,VITVI01G00376,VITVI01G00568,VITVI02G00617,VITVI02G00634,VITVI02G00384,VITVI02G00553,VITVI03G00139,VITVI03G00530,VITVI03G00492,VITVI03G00400,VITVI03G00570,VITVI03G00892,VITVI03G00539,VITVI04G01759,VITVI04G00748,VITVI05G01314,VITVI05G00164,VITVI05G01583,VITVI06G00021,VITVI06G00501,VITVI06G00580,VITVI06G00746,VITVI06…
GO:BP	cellular nitrogen compound metabolic process	GO:0034641	0.000110532	3.95651	5978	1061	237	35134	VITVI07G00073,VITVI10G00380,VITVI10G00383,VITVI14G02411,VITVI13G00239,VITVI10G00414,VITVI01G01362,VITVI01G01413,VITVI01G01680,VITVI01G00060,VITVI01G00163,VITVI01G00171,VITVI01G04062,VITVI01G00412,VITVI01G00427,VITVI01G00511,VITVI01G00523,VITVI01G00545,VITVI01G00836,VITVI01G02098,VITVI01G01040,VITVI02G00654,VITVI02G00709,VITVI02G00759,VITVI02G00089,VITVI02G00188,VITVI02G00315,VITVI02G00326,VITVI02…
GO:BP	chromatin organization	GO:0006325	0.00011192	3.95109	293	1061	25	35134	VITVI01G00273,VITVI02G00759,VITVI02G00329,VITVI04G00523,VITVI04G01714,VITVI05G00453,VITVI05G02135,VITVI06G04090,VITVI06G00477,VITVI06G01262,VITVI07G02048,VITVI08G01767,VITVI10G00425,VITVI11G00163,VITVI11G00367,VITVI12G00328,VITVI14G00743,VITVI14G01787,VITVI14G01462,VITVI15G00014,VITVI18G00220,VITVI18G00251,VITVI18G02964,VITVI19G01624,VITVI19G01756
GO:BP	establishment of protein localization	GO:0045184	0.000120034	3.9207	672	1061	43	35134	VITVI10G01213,VITVI04G04411,VITVI10G02343,VITVI10G00385,VITVI04G02278,VITVI02G04129,VITVI01G00190,VITVI01G00376,VITVI02G00617,VITVI02G00411,VITVI03G00103,VITVI03G00180,VITVI04G01893,VITVI04G00526,VITVI05G00210,VITVI05G00632,VITVI05G00085,VITVI06G00053,VITVI06G00397,VITVI06G04416,VITVI06G01364,VITVI07G00343,VITVI07G00603,VITVI07G04496,VITVI08G01946,VITVI08G00187,VITVI09G00061,VITVI09G00816,VITVI10…
GO:BP	protein localization to organelle	GO:0033365	0.000144571	3.83992	260	1061	23	35134	VITVI10G01213,VITVI04G02278,VITVI01G00190,VITVI01G00376,VITVI02G00617,VITVI03G00180,VITVI05G00210,VITVI06G00053,VITVI06G01364,VITVI06G01521,VITVI07G00603,VITVI07G01688,VITVI07G04496,VITVI08G01946,VITVI09G00061,VITVI11G01106,VITVI14G00472,VITVI14G01871,VITVI14G01418,VITVI14G02046,VITVI15G00009,VITVI16G01394,VITVI19G01763
GO:BP	regulation of macromolecule metabolic process	GO:0060255	0.000170657	3.76788	2652	1061	120	35134	VITVI10G00380,VITVI01G01680,VITVI01G00412,VITVI01G00427,VITVI01G00511,VITVI01G00545,VITVI01G02098,VITVI01G01040,VITVI02G00709,VITVI02G00759,VITVI02G00089,VITVI02G00329,VITVI02G00380,VITVI03G01011,VITVI03G00400,VITVI03G00559,VITVI04G00219,VITVI04G00513,VITVI04G00550,VITVI04G01252,VITVI04G01452,VITVI04G01714,VITVI04G00824,VITVI05G00239,VITVI05G00453,VITVI05G00496,VITVI05G01723,VITVI05G01344,VITVI05…
GO:BP	heterocycle metabolic process	GO:0046483	0.000203585	3.69125	5500	1061	219	35134	VITVI07G00073,VITVI10G00380,VITVI14G02411,VITVI13G00239,VITVI01G01362,VITVI01G01413,VITVI01G01680,VITVI01G04062,VITVI01G00412,VITVI01G00427,VITVI01G00511,VITVI01G00523,VITVI01G00545,VITVI01G00836,VITVI01G02098,VITVI01G01040,VITVI02G00654,VITVI02G00709,VITVI02G00759,VITVI02G00089,VITVI02G00188,VITVI02G00315,VITVI02G00326,VITVI02G00329,VITVI02G00380,VITVI02G00411,VITVI02G01274,VITVI03G00139,VITVI03…
GO:BP	protein transport	GO:0015031	0.000208135	3.68165	666	1061	42	35134	VITVI10G01213,VITVI04G04411,VITVI10G02343,VITVI10G00385,VITVI04G02278,VITVI02G04129,VITVI01G00190,VITVI01G00376,VITVI02G00617,VITVI02G00411,VITVI03G00103,VITVI03G00180,VITVI04G01893,VITVI04G00526,VITVI05G00210,VITVI05G00632,VITVI05G00085,VITVI06G00053,VITVI06G00397,VITVI06G04416,VITVI06G01364,VITVI07G00343,VITVI07G00603,VITVI07G04496,VITVI08G01946,VITVI08G00187,VITVI09G00061,VITVI09G00816,VITVI10…
GO:BP	fruit development	GO:0010154	0.000210258	3.67725	160	1061	17	35134	VITVI10G00455,VITVI01G00836,VITVI03G00570,VITVI04G00824,VITVI06G00017,VITVI07G00307,VITVI07G00217,VITVI09G00162,VITVI09G00430,VITVI13G00659,VITVI14G04618,VITVI14G01480,VITVI14G02046,VITVI15G00650,VITVI18G00230,VITVI18G00250,VITVI19G01776
GO:BP	RNA metabolic process	GO:0016070	0.000210258	3.67725	3731	1061	158	35134	VITVI10G00380,VITVI01G01413,VITVI01G01680,VITVI01G04062,VITVI01G00412,VITVI01G00427,VITVI01G00511,VITVI01G00523,VITVI01G00545,VITVI01G00836,VITVI01G02098,VITVI01G01040,VITVI02G00654,VITVI02G00709,VITVI02G00759,VITVI02G00089,VITVI02G00329,VITVI02G00380,VITVI02G01274,VITVI03G00308,VITVI03G00400,VITVI03G00559,VITVI04G00231,VITVI04G00513,VITVI04G00613,VITVI04G01252,VITVI04G01367,VITVI04G01452,VITVI04…
GO:BP	cellular response to stress	GO:0033554	0.000217107	3.66333	737	1061	45	35134	VITVI07G00073,VITVI13G00239,VITVI10G04302,VITVI01G01680,VITVI01G00511,VITVI01G00793,VITVI02G00048,VITVI02G00326,VITVI02G00411,VITVI03G00530,VITVI04G00231,VITVI04G01452,VITVI05G00408,VITVI05G01314,VITVI05G01493,VITVI06G01146,VITVI06G01364,VITVI07G00307,VITVI07G01989,VITVI07G00184,VITVI07G02013,VITVI08G01367,VITVI08G01513,VITVI09G00287,VITVI09G00619,VITVI03G04000,VITVI10G00425,VITVI11G00163,VITVI11…
GO:BP	regulation of signal transduction	GO:0009966	0.000241564	3.61697	162	1061	17	35134	VITVI04G00115,VITVI04G01252,VITVI06G01526,VITVI07G01989,VITVI07G00217,VITVI08G01787,VITVI09G00064,VITVI09G01621,VITVI09G00427,VITVI10G00659,VITVI11G00005,VITVI13G00055,VITVI14G01480,VITVI17G00344,VITVI18G00250,VITVI18G00496,VITVI19G00025
GO:BP	negative regulation of metabolic process	GO:0009892	0.000245202	3.61048	431	1061	31	35134	VITVI01G01680,VITVI01G02098,VITVI03G01011,VITVI03G00400,VITVI05G00496,VITVI06G04090,VITVI06G00477,VITVI06G00580,VITVI06G01268,VITVI07G00307,VITVI07G00217,VITVI07G01634,VITVI07G02048,VITVI08G01645,VITVI08G01767,VITVI08G00120,VITVI08G00644,VITVI10G00497,VITVI12G01868,VITVI12G00414,VITVI13G00573,VITVI14G04618,VITVI14G01394,VITVI14G01480,VITVI15G00637,VITVI15G00864,VITVI16G00625,VITVI17G00153,VITVI17…
GO:BP	regulation of signaling	GO:0023051	0.000251996	3.59861	163	1061	17	35134	VITVI04G00115,VITVI04G01252,VITVI06G01526,VITVI07G01989,VITVI07G00217,VITVI08G01787,VITVI09G00064,VITVI09G01621,VITVI09G00427,VITVI10G00659,VITVI11G00005,VITVI13G00055,VITVI14G01480,VITVI17G00344,VITVI18G00250,VITVI18G00496,VITVI19G00025
GO:BP	regulation of cell communication	GO:0010646	0.000251996	3.59861	163	1061	17	35134	VITVI04G00115,VITVI04G01252,VITVI06G01526,VITVI07G01989,VITVI07G00217,VITVI08G01787,VITVI09G00064,VITVI09G01621,VITVI09G00427,VITVI10G00659,VITVI11G00005,VITVI13G00055,VITVI14G01480,VITVI17G00344,VITVI18G00250,VITVI18G00496,VITVI19G00025
GO:BP	negative regulation of biological process	GO:0048519	0.00029803	3.52574	611	1061	39	35134	VITVI01G01680,VITVI01G02098,VITVI02G00048,VITVI03G01011,VITVI03G00400,VITVI05G00496,VITVI06G04090,VITVI06G00477,VITVI06G00580,VITVI06G01268,VITVI07G00307,VITVI07G00217,VITVI07G01634,VITVI07G02048,VITVI08G01645,VITVI08G01767,VITVI08G01787,VITVI08G01924,VITVI08G00120,VITVI08G00644,VITVI09G01621,VITVI09G00427,VITVI10G00497,VITVI11G01212,VITVI12G01868,VITVI12G00414,VITVI13G00573,VITVI14G04618,VITVI14…
GO:BP	small molecule metabolic process	GO:0044281	0.000311303	3.50682	1516	1061	76	35134	VITVI07G00062,VITVI10G00380,VITVI10G00383,VITVI10G00185,VITVI07G02896,VITVI02G01726,VITVI01G01362,VITVI01G00035,VITVI01G00178,VITVI01G00246,VITVI01G00286,VITVI01G00568,VITVI02G00724,VITVI02G00188,VITVI02G00315,VITVI02G00326,VITVI03G00892,VITVI04G00009,VITVI04G00318,VITVI04G01914,VITVI05G00242,VITVI05G01314,VITVI05G01493,VITVI06G00021,VITVI06G00236,VITVI07G00307,VITVI08G01311,VITVI08G01319,VITVI08…
GO:BP	signal transduction	GO:0007165	0.000333142	3.47737	1239	1061	65	35134	VITVI01G01499,VITVI02G00048,VITVI02G00380,VITVI03G00358,VITVI04G00115,VITVI04G01252,VITVI04G01691,VITVI04G00824,VITVI05G01723,VITVI05G00764,VITVI05G01320,VITVI06G00775,VITVI06G00993,VITVI06G01268,VITVI06G01480,VITVI06G01526,VITVI07G00357,VITVI07G02290,VITVI07G00745,VITVI07G01874,VITVI07G01989,VITVI07G00217,VITVI08G01255,VITVI08G01267,VITVI08G01787,VITVI08G00835,VITVI09G00064,VITVI09G01621,VITVI09…
GO:BP	mitochondrial fission	GO:0000266	0.000354242	3.4507	19	1061	6	35134	VITVI06G01521,VITVI08G02314,VITVI08G02315,VITVI15G00448,VITVI15G00958,VITVI18G02359
GO:BP	regulation of response to stimulus	GO:0048583	0.000362846	3.44028	298	1061	24	35134	VITVI01G01680,VITVI04G00115,VITVI04G01252,VITVI05G02135,VITVI06G01526,VITVI07G01989,VITVI07G00217,VITVI07G01634,VITVI08G01787,VITVI09G00064,VITVI09G01621,VITVI09G00427,VITVI09G00816,VITVI10G00659,VITVI10G00138,VITVI11G00005,VITVI13G00055,VITVI14G00167,VITVI14G01480,VITVI17G00344,VITVI18G00250,VITVI18G00496,VITVI19G00025,VITVI19G01756
GO:BP	signaling	GO:0023052	0.000401392	3.39643	1248	1061	65	35134	VITVI01G01499,VITVI02G00048,VITVI02G00380,VITVI03G00358,VITVI04G00115,VITVI04G01252,VITVI04G01691,VITVI04G00824,VITVI05G01723,VITVI05G00764,VITVI05G01320,VITVI06G00775,VITVI06G00993,VITVI06G01268,VITVI06G01480,VITVI06G01526,VITVI07G00357,VITVI07G02290,VITVI07G00745,VITVI07G01874,VITVI07G01989,VITVI07G00217,VITVI08G01255,VITVI08G01267,VITVI08G01787,VITVI08G00835,VITVI09G00064,VITVI09G01621,VITVI09…
GO:BP	intracellular protein transport	GO:0006886	0.000454967	3.34202	469	1061	32	35134	VITVI10G01213,VITVI04G04411,VITVI10G02343,VITVI10G00385,VITVI04G02278,VITVI02G04129,VITVI01G00190,VITVI01G00376,VITVI02G00617,VITVI03G00180,VITVI05G00210,VITVI05G00632,VITVI05G00085,VITVI06G00053,VITVI06G01364,VITVI07G00343,VITVI07G00603,VITVI07G04496,VITVI08G01946,VITVI08G00187,VITVI09G00061,VITVI11G01106,VITVI13G00659,VITVI13G01256,VITVI14G00472,VITVI14G00125,VITVI14G01871,VITVI14G01418,VITVI15…
GO:BP	protein import into nucleus	GO:0006606	0.000457963	3.33917	51	1061	9	35134	VITVI01G00190,VITVI03G00180,VITVI06G00053,VITVI08G01946,VITVI09G00061,VITVI14G01871,VITVI14G01418,VITVI16G01394,VITVI19G01763
GO:BP	polyol metabolic process	GO:0019751	0.000505745	3.29607	40	1061	8	35134	VITVI10G00383,VITVI02G00724,VITVI08G01311,VITVI09G00691,VITVI10G00285,VITVI18G00994,VITVI18G02381,VITVI19G00596
GO:BP	nucleic acid metabolic process	GO:0090304	0.000598847	3.22268	4928	1061	196	35134	VITVI07G00073,VITVI10G00380,VITVI14G02411,VITVI13G00239,VITVI01G01413,VITVI01G01680,VITVI01G04062,VITVI01G00412,VITVI01G00427,VITVI01G00511,VITVI01G00523,VITVI01G00545,VITVI01G00836,VITVI01G02098,VITVI01G01040,VITVI02G00654,VITVI02G00709,VITVI02G00759,VITVI02G00089,VITVI02G00329,VITVI02G00380,VITVI02G00411,VITVI02G01274,VITVI03G00139,VITVI03G00308,VITVI03G00400,VITVI03G00559,VITVI04G00045,VITVI04…
GO:BP	import into nucleus	GO:0051170	0.000610488	3.21432	53	1061	9	35134	VITVI01G00190,VITVI03G00180,VITVI06G00053,VITVI08G01946,VITVI09G00061,VITVI14G01871,VITVI14G01418,VITVI16G01394,VITVI19G01763
GO:BP	organelle organization	GO:0006996	0.000626627	3.20299	1168	1061	61	35134	VITVI10G01213,VITVI07G04656,VITVI07G01345,VITVI10G00385,VITVI01G01646,VITVI01G00060,VITVI01G00219,VITVI01G00376,VITVI02G00617,VITVI02G00699,VITVI02G00327,VITVI03G00492,VITVI04G00526,VITVI04G00613,VITVI04G04396,VITVI04G00749,VITVI05G00287,VITVI05G00632,VITVI05G01120,VITVI05G01320,VITVI05G00106,VITVI05G00085,VITVI05G02135,VITVI06G01364,VITVI06G01521,VITVI07G00335,VITVI07G00603,VITVI07G00606,VITVI07…
GO:BP	protein localization to nucleus	GO:0034504	0.000697237	3.15662	54	1061	9	35134	VITVI01G00190,VITVI03G00180,VITVI06G00053,VITVI08G01946,VITVI09G00061,VITVI14G01871,VITVI14G01418,VITVI16G01394,VITVI19G01763
GO:BP	negative regulation of macromolecule metabolic process	GO:0010605	0.000750401	3.12471	418	1061	29	35134	VITVI01G01680,VITVI01G02098,VITVI03G01011,VITVI03G00400,VITVI05G00496,VITVI06G04090,VITVI06G00477,VITVI06G00580,VITVI06G01268,VITVI07G00307,VITVI07G00217,VITVI07G01634,VITVI07G02048,VITVI08G01645,VITVI08G01767,VITVI08G00120,VITVI08G00644,VITVI10G00497,VITVI12G01868,VITVI12G00414,VITVI13G00573,VITVI14G04618,VITVI14G01394,VITVI15G00637,VITVI15G00864,VITVI16G00625,VITVI17G00153,VITVI17G00987,VITVI18…
GO:BP	negative regulation of gene expression	GO:0010629	0.000946366	3.02394	239	1061	20	35134	VITVI03G01011,VITVI03G00400,VITVI06G04090,VITVI06G00477,VITVI06G00580,VITVI06G01268,VITVI07G00307,VITVI07G00217,VITVI07G02048,VITVI08G01645,VITVI08G01767,VITVI08G00120,VITVI08G00644,VITVI12G01868,VITVI12G00414,VITVI14G04618,VITVI15G00637,VITVI15G00864,VITVI16G00625,VITVI18G00303
GO:BP	chemical homeostasis	GO:0048878	0.00118165	2.92751	243	1061	20	35134	VITVI02G01726,VITVI01G00108,VITVI01G01040,VITVI02G00048,VITVI02G00377,VITVI04G01225,VITVI04G01252,VITVI05G00359,VITVI05G01655,VITVI07G02013,VITVI08G01172,VITVI08G01174,VITVI09G00189,VITVI10G00751,VITVI11G00419,VITVI11G00593,VITVI15G00567,VITVI18G00643,VITVI18G01304,VITVI19G00145
GO:BP	response to chemical	GO:0042221	0.0014159	2.84897	1490	1061	72	35134	VITVI01G01499,VITVI02G00634,VITVI02G00048,VITVI02G00326,VITVI02G00403,VITVI03G01173,VITVI03G01481,VITVI03G00530,VITVI03G00570,VITVI04G00115,VITVI04G01252,VITVI04G00824,VITVI05G00408,VITVI05G00469,VITVI05G01723,VITVI05G01344,VITVI05G01493,VITVI06G01727,VITVI06G01146,VITVI06G01268,VITVI06G01480,VITVI07G00286,VITVI07G00357,VITVI07G02290,VITVI07G01874,VITVI07G01989,VITVI07G00184,VITVI07G00217,VITVI07…
GO:BP	homeostatic process	GO:0042592	0.00146204	2.83504	287	1061	22	35134	VITVI02G01726,VITVI01G00108,VITVI01G01040,VITVI02G00048,VITVI02G00377,VITVI03G00514,VITVI04G01225,VITVI04G01252,VITVI05G00359,VITVI05G01655,VITVI07G02013,VITVI08G01172,VITVI08G01174,VITVI09G00189,VITVI10G00751,VITVI11G00419,VITVI11G00593,VITVI14G00472,VITVI15G00567,VITVI18G00643,VITVI18G01304,VITVI19G00145
GO:BP	vesicle organization	GO:0016050	0.00150464	2.82257	104	1061	12	35134	VITVI10G00385,VITVI01G00376,VITVI02G00699,VITVI04G00526,VITVI04G04396,VITVI05G00632,VITVI05G01120,VITVI06G01364,VITVI08G00187,VITVI11G00387,VITVI14G00125,VITVI14G01871
GO:BP	organic substance catabolic process	GO:1901575	0.00181601	2.74088	1451	1061	70	35134	VITVI07G00062,VITVI10G00185,VITVI02G01726,VITVI00G04508,VITVI01G01362,VITVI01G00376,VITVI01G00568,VITVI02G00617,VITVI02G00634,VITVI02G00384,VITVI02G00553,VITVI03G00139,VITVI03G00530,VITVI03G00400,VITVI03G00570,VITVI03G00892,VITVI03G00539,VITVI05G01314,VITVI05G00164,VITVI05G01583,VITVI06G00021,VITVI06G00501,VITVI06G00580,VITVI06G00746,VITVI06G00979,VITVI06G01070,VITVI06G01146,VITVI06G01268,VITVI07…
GO:BP	organic cyclic compound biosynthetic process	GO:1901362	0.00218371	2.66081	2863	1061	121	35134	VITVI10G00380,VITVI13G00239,VITVI13G00238,VITVI07G02555,VITVI07G03083,VITVI01G01413,VITVI01G01680,VITVI01G00412,VITVI01G00427,VITVI01G00511,VITVI01G00545,VITVI01G02098,VITVI01G01040,VITVI02G00709,VITVI02G00759,VITVI02G00089,VITVI02G00188,VITVI02G00283,VITVI02G00315,VITVI02G00326,VITVI02G00329,VITVI02G00377,VITVI02G00380,VITVI03G00559,VITVI04G00318,VITVI04G00513,VITVI04G01252,VITVI04G01452,VITVI04…
GO:BP	aromatic compound biosynthetic process	GO:0019438	0.0022564	2.64658	2781	1061	118	35134	VITVI10G00380,VITVI13G00239,VITVI13G00238,VITVI07G02555,VITVI07G03083,VITVI01G01413,VITVI01G01680,VITVI01G00412,VITVI01G00427,VITVI01G00511,VITVI01G00545,VITVI01G02098,VITVI01G01040,VITVI02G00709,VITVI02G00759,VITVI02G00089,VITVI02G00188,VITVI02G00263,VITVI02G00283,VITVI02G00315,VITVI02G00326,VITVI02G00329,VITVI02G00380,VITVI03G00559,VITVI04G00513,VITVI04G01252,VITVI04G01452,VITVI04G01714,VITVI04…
GO:BP	response to organic substance	GO:0010033	0.00283867	2.54688	1033	1061	53	35134	VITVI01G01499,VITVI02G00048,VITVI02G00326,VITVI03G01481,VITVI03G00530,VITVI03G00570,VITVI04G00115,VITVI04G01252,VITVI04G00824,VITVI05G00469,VITVI05G01723,VITVI05G01344,VITVI06G01146,VITVI06G01268,VITVI06G01480,VITVI07G00357,VITVI07G02290,VITVI07G01874,VITVI07G01989,VITVI07G00217,VITVI07G01598,VITVI08G01267,VITVI08G01787,VITVI08G00835,VITVI08G00836,VITVI09G00064,VITVI09G01621,VITVI09G00427,VITVI09…
GO:BP	nucleobase-containing compound biosynthetic process	GO:0034654	0.00283867	2.54688	2516	1061	108	35134	VITVI10G00380,VITVI01G01413,VITVI01G01680,VITVI01G00412,VITVI01G00427,VITVI01G00511,VITVI01G00545,VITVI01G02098,VITVI01G01040,VITVI02G00709,VITVI02G00759,VITVI02G00089,VITVI02G00188,VITVI02G00315,VITVI02G00329,VITVI02G00380,VITVI03G00559,VITVI04G00513,VITVI04G01252,VITVI04G01452,VITVI04G01714,VITVI04G00824,VITVI05G00239,VITVI05G00453,VITVI05G00496,VITVI05G01723,VITVI05G00166,VITVI05G00106,VITVI05…
GO:BP	endosome organization	GO:0007032	0.00291717	2.53504	10	1061	4	35134	VITVI01G00376,VITVI04G04396,VITVI05G01120,VITVI11G00387
GO:BP	heterocycle biosynthetic process	GO:0018130	0.00340053	2.46845	2671	1061	113	35134	VITVI10G00380,VITVI01G01413,VITVI01G01680,VITVI01G00412,VITVI01G00427,VITVI01G00511,VITVI01G00545,VITVI01G02098,VITVI01G01040,VITVI02G00709,VITVI02G00759,VITVI02G00089,VITVI02G00188,VITVI02G00315,VITVI02G00326,VITVI02G00329,VITVI02G00380,VITVI03G00559,VITVI04G00318,VITVI04G00513,VITVI04G01252,VITVI04G01452,VITVI04G01714,VITVI04G00824,VITVI05G00239,VITVI05G00453,VITVI05G00496,VITVI05G01723,VITVI05…
GO:BP	vesicle-mediated transport	GO:0016192	0.00340053	2.46845	482	1061	30	35134	VITVI10G02343,VITVI10G00385,VITVI01G00376,VITVI02G00699,VITVI04G00526,VITVI04G04396,VITVI05G00210,VITVI05G00611,VITVI05G00632,VITVI05G01120,VITVI05G00085,VITVI06G00397,VITVI06G04416,VITVI06G01364,VITVI07G00343,VITVI07G01688,VITVI07G00030,VITVI08G01171,VITVI08G00187,VITVI09G01300,VITVI10G01135,VITVI11G00005,VITVI11G00387,VITVI13G00659,VITVI13G00121,VITVI13G00858,VITVI14G00125,VITVI14G01871,VITVI14…
GO:BP	seed development	GO:0048316	0.00362943	2.44016	150	1061	14	35134	VITVI10G00455,VITVI01G00836,VITVI03G00570,VITVI06G00017,VITVI07G00307,VITVI09G00430,VITVI13G00659,VITVI14G04618,VITVI14G01480,VITVI14G02046,VITVI15G00650,VITVI18G00230,VITVI18G00250,VITVI19G01776
GO:BP	response to abiotic stimulus	GO:0009628	0.00401567	2.39624	604	1061	35	35134	VITVI01G01499,VITVI01G00511,VITVI01G00836,VITVI01G01040,VITVI02G00048,VITVI02G00326,VITVI02G00551,VITVI03G01481,VITVI03G00541,VITVI05G00408,VITVI05G00469,VITVI05G02135,VITVI06G01268,VITVI07G00184,VITVI08G01513,VITVI08G01924,VITVI08G00835,VITVI08G00874,VITVI09G01501,VITVI09G00430,VITVI09G00816,VITVI11G00005,VITVI11G00367,VITVI11G01148,VITVI14G00167,VITVI14G01787,VITVI14G01483,VITVI14G01330,VITVI14…
GO:BP	establishment of RNA localization	GO:0051236	0.00406015	2.39146	69	1061	9	35134	VITVI01G00523,VITVI02G00411,VITVI03G00103,VITVI06G00017,VITVI06G01268,VITVI08G01946,VITVI09G00061,VITVI09G00816,VITVI19G01763
GO:BP	RNA transport	GO:0050658	0.00406015	2.39146	69	1061	9	35134	VITVI01G00523,VITVI02G00411,VITVI03G00103,VITVI06G00017,VITVI06G01268,VITVI08G01946,VITVI09G00061,VITVI09G00816,VITVI19G01763
GO:BP	DNA-templated transcription	GO:0006351	0.00406015	2.39146	2153	1061	94	35134	VITVI10G00380,VITVI01G01413,VITVI01G01680,VITVI01G00412,VITVI01G00427,VITVI01G00511,VITVI01G00545,VITVI01G02098,VITVI01G01040,VITVI02G00709,VITVI02G00759,VITVI02G00089,VITVI02G00329,VITVI02G00380,VITVI03G00559,VITVI04G00513,VITVI04G01252,VITVI04G01452,VITVI04G01714,VITVI04G00824,VITVI05G00239,VITVI05G00453,VITVI05G00496,VITVI05G01723,VITVI05G00166,VITVI05G00106,VITVI05G02135,VITVI06G00048,VITVI06…
GO:BP	nucleic acid transport	GO:0050657	0.00406015	2.39146	69	1061	9	35134	VITVI01G00523,VITVI02G00411,VITVI03G00103,VITVI06G00017,VITVI06G01268,VITVI08G01946,VITVI09G00061,VITVI09G00816,VITVI19G01763
GO:BP	organic hydroxy compound metabolic process	GO:1901615	0.00445596	2.35106	251	1061	19	35134	VITVI10G00380,VITVI10G00383,VITVI02G00724,VITVI02G00377,VITVI07G00307,VITVI08G01311,VITVI09G00691,VITVI10G00764,VITVI10G00285,VITVI12G00405,VITVI14G01657,VITVI14G01480,VITVI18G00490,VITVI18G00886,VITVI18G00994,VITVI18G01304,VITVI18G02381,VITVI19G00025,VITVI19G00596
GO:BP	acceptance of pollen	GO:0060321	0.00460223	2.33703	5	1061	3	35134	VITVI07G00343,VITVI09G01300,VITVI13G00659
GO:BP	protein retention in Golgi apparatus	GO:0045053	0.00460223	2.33703	5	1061	3	35134	VITVI05G00210,VITVI07G04496,VITVI15G00009
GO:BP	RNA biosynthetic process	GO:0032774	0.00468208	2.32956	2165	1061	94	35134	VITVI10G00380,VITVI01G01413,VITVI01G01680,VITVI01G00412,VITVI01G00427,VITVI01G00511,VITVI01G00545,VITVI01G02098,VITVI01G01040,VITVI02G00709,VITVI02G00759,VITVI02G00089,VITVI02G00329,VITVI02G00380,VITVI03G00559,VITVI04G00513,VITVI04G01252,VITVI04G01452,VITVI04G01714,VITVI04G00824,VITVI05G00239,VITVI05G00453,VITVI05G00496,VITVI05G01723,VITVI05G00166,VITVI05G00106,VITVI05G02135,VITVI06G00048,VITVI06…
GO:BP	organophosphate metabolic process	GO:0019637	0.00479516	2.3192	565	1061	33	35134	VITVI01G01362,VITVI02G00724,VITVI02G00188,VITVI02G00315,VITVI03G00358,VITVI04G01565,VITVI05G01314,VITVI06G00236,VITVI07G00307,VITVI07G00105,VITVI08G01319,VITVI08G01873,VITVI08G00676,VITVI09G00093,VITVI09G00691,VITVI10G00285,VITVI11G00026,VITVI11G00128,VITVI11G00237,VITVI11G00447,VITVI12G01866,VITVI13G01645,VITVI13G00731,VITVI13G01613,VITVI14G01605,VITVI15G00810,VITVI18G04730,VITVI18G00368,VITVI18…
GO:BP	vegetative to reproductive phase transition of meristem	GO:0010228	0.00479516	2.3192	71	1061	9	35134	VITVI02G00551,VITVI05G02135,VITVI06G01268,VITVI07G00267,VITVI09G00816,VITVI10G00497,VITVI12G02128,VITVI14G01787,VITVI14G01480
GO:BP	regulation of biological quality	GO:0065008	0.00482644	2.31637	360	1061	24	35134	VITVI01G00199,VITVI01G02092,VITVI02G00377,VITVI04G01759,VITVI05G00359,VITVI05G00421,VITVI05G00106,VITVI06G00113,VITVI06G00979,VITVI08G01924,VITVI09G00189,VITVI09G00220,VITVI10G00055,VITVI11G00005,VITVI11G01212,VITVI12G04069,VITVI13G01057,VITVI13G01613,VITVI14G01330,VITVI15G00567,VITVI16G00952,VITVI18G00303,VITVI18G01304,VITVI19G00025
GO:BP	mRNA transport	GO:0051028	0.00503654	2.29787	57	1061	8	35134	VITVI01G00523,VITVI02G00411,VITVI03G00103,VITVI06G01268,VITVI08G01946,VITVI09G00061,VITVI09G00816,VITVI19G01763
GO:BP	anatomical structure morphogenesis	GO:0009653	0.00558739	2.25279	278	1061	20	35134	VITVI01G01680,VITVI03G00139,VITVI05G00287,VITVI05G00106,VITVI06G00113,VITVI07G00343,VITVI07G00496,VITVI07G00217,VITVI08G01323,VITVI09G00162,VITVI09G01006,VITVI11G00005,VITVI12G04069,VITVI13G00260,VITVI14G01787,VITVI14G01308,VITVI14G01330,VITVI15G00782,VITVI15G00876,VITVI18G00250
GO:BP	long-chain fatty acid biosynthetic process	GO:0042759	0.00558739	2.25279	12	1061	4	35134	VITVI01G00246,VITVI08G01311,VITVI14G01246,VITVI18G00886
GO:BP	response to hormone	GO:0009725	0.00605101	2.21817	769	1061	41	35134	VITVI01G01499,VITVI02G00048,VITVI02G00326,VITVI03G01481,VITVI03G00570,VITVI04G00115,VITVI04G01252,VITVI04G00824,VITVI05G00469,VITVI05G01723,VITVI05G01344,VITVI06G01268,VITVI07G00357,VITVI07G02290,VITVI07G01874,VITVI07G00217,VITVI08G01267,VITVI08G01787,VITVI08G00835,VITVI09G00064,VITVI09G01621,VITVI09G00427,VITVI09G00816,VITVI11G00005,VITVI11G00035,VITVI11G00796,VITVI12G00102,VITVI12G02128,VITVI13…
GO:BP	protein-containing complex organization	GO:0043933	0.00648375	2.18817	822	1061	43	35134	VITVI10G02343,VITVI01G00060,VITVI01G00171,VITVI01G00273,VITVI02G00759,VITVI02G00329,VITVI04G00519,VITVI04G00523,VITVI04G01714,VITVI05G00287,VITVI05G00453,VITVI05G01344,VITVI05G02135,VITVI06G04090,VITVI06G00477,VITVI06G01146,VITVI06G01262,VITVI07G00335,VITVI07G02048,VITVI08G01256,VITVI08G01767,VITVI08G01924,VITVI10G00717,VITVI10G00425,VITVI11G00163,VITVI11G00367,VITVI11G01212,VITVI11G01319,VITVI12…
GO:BP	positive regulation of GTPase activity	GO:0043547	0.00658289	2.18158	33	1061	6	35134	VITVI01G01499,VITVI02G00699,VITVI08G01171,VITVI11G00005,VITVI11G01136,VITVI19G00290
GO:BP	long-chain fatty acid metabolic process	GO:0001676	0.00658289	2.18158	33	1061	6	35134	VITVI02G01726,VITVI01G00246,VITVI08G01311,VITVI14G01246,VITVI14G02541,VITVI18G00886
GO:BP	response to endogenous stimulus	GO:0009719	0.00666649	2.1761	774	1061	41	35134	VITVI01G01499,VITVI02G00048,VITVI02G00326,VITVI03G01481,VITVI03G00570,VITVI04G00115,VITVI04G01252,VITVI04G00824,VITVI05G00469,VITVI05G01723,VITVI05G01344,VITVI06G01268,VITVI07G00357,VITVI07G02290,VITVI07G01874,VITVI07G00217,VITVI08G01267,VITVI08G01787,VITVI08G00835,VITVI09G00064,VITVI09G01621,VITVI09G00427,VITVI09G00816,VITVI11G00005,VITVI11G00035,VITVI11G00796,VITVI12G00102,VITVI12G02128,VITVI13…
GO:BP	RNA localization	GO:0006403	0.00668796	2.17471	75	1061	9	35134	VITVI01G00523,VITVI02G00411,VITVI03G00103,VITVI06G00017,VITVI06G01268,VITVI08G01946,VITVI09G00061,VITVI09G00816,VITVI19G01763
GO:BP	peptidyl-amino acid modification	GO:0018193	0.00711599	2.14776	306	1061	21	35134	VITVI04G04411,VITVI02G04129,VITVI01G00484,VITVI02G00043,VITVI04G00513,VITVI05G00764,VITVI05G01493,VITVI05G02135,VITVI06G00993,VITVI08G01267,VITVI08G00874,VITVI09G00150,VITVI09G00430,VITVI13G00573,VITVI14G00605,VITVI14G00648,VITVI14G01462,VITVI15G01648,VITVI18G00175,VITVI18G00220,VITVI18G01103
GO:BP	post-translational protein modification	GO:0043687	0.00731394	2.13585	704	1061	38	35134	VITVI00G04839,VITVI01G00192,VITVI01G00614,VITVI02G00043,VITVI02G00384,VITVI03G00139,VITVI03G00519,VITVI04G00513,VITVI05G00408,VITVI05G00085,VITVI05G02135,VITVI06G00501,VITVI06G00746,VITVI06G00979,VITVI07G00484,VITVI07G01826,VITVI07G00184,VITVI08G01201,VITVI08G00836,VITVI09G00012,VITVI11G00304,VITVI12G02128,VITVI13G00573,VITVI13G01057,VITVI13G01483,VITVI14G00668,VITVI14G01787,VITVI14G01462,VITVI15…
GO:BP	mRNA metabolic process	GO:0016071	0.00765901	2.11583	489	1061	29	35134	VITVI01G04062,VITVI01G00523,VITVI01G00836,VITVI03G00400,VITVI04G00613,VITVI06G00580,VITVI06G01268,VITVI07G00307,VITVI08G01645,VITVI08G00097,VITVI08G00120,VITVI09G00139,VITVI09G00277,VITVI10G00717,VITVI11G00024,VITVI11G00688,VITVI12G01868,VITVI12G01869,VITVI12G02126,VITVI12G00591,VITVI14G01151,VITVI15G01649,VITVI16G01348,VITVI17G00882,VITVI18G00303,VITVI18G00576,VITVI18G00624,VITVI18G00069,VITVI19…
GO:BP	pollen-pistil interaction	GO:0009875	0.00990458	2.00416	14	1061	4	35134	VITVI07G00343,VITVI09G01300,VITVI13G00659,VITVI19G00675
GO:BP	regulation of RNA metabolic process	GO:0051252	0.00994608	2.00235	2028	1061	87	35134	VITVI10G00380,VITVI01G01680,VITVI01G00412,VITVI01G00427,VITVI01G00511,VITVI01G00545,VITVI01G02098,VITVI01G01040,VITVI02G00709,VITVI02G00759,VITVI02G00089,VITVI02G00329,VITVI02G00380,VITVI03G00559,VITVI04G00513,VITVI04G01252,VITVI04G01452,VITVI04G01714,VITVI04G00824,VITVI05G00239,VITVI05G00453,VITVI05G00496,VITVI05G01723,VITVI05G00166,VITVI05G00106,VITVI05G02135,VITVI06G00048,VITVI06G04095,VITVI06…
GO:BP	regulation of GTPase activity	GO:0043087	0.00999364	2.00028	36	1061	6	35134	VITVI01G01499,VITVI02G00699,VITVI08G01171,VITVI11G00005,VITVI11G01136,VITVI19G00290
GO:BP	positive regulation of hydrolase activity	GO:0051345	0.00999364	2.00028	36	1061	6	35134	VITVI01G01499,VITVI02G00699,VITVI08G01171,VITVI11G00005,VITVI11G01136,VITVI19G00290
GO:BP	protein modification process	GO:0036211	0.00999795	2.00009	2885	1061	117	35134	VITVI04G04411,VITVI14G02411,VITVI10G02135,VITVI10G04302,VITVI00G04839,VITVI02G04129,VITVI01G01439,VITVI01G00038,VITVI01G00182,VITVI01G00192,VITVI01G04077,VITVI01G00484,VITVI01G00614,VITVI02G00043,VITVI02G00380,VITVI02G00384,VITVI03G00139,VITVI03G00284,VITVI03G00519,VITVI04G00513,VITVI04G01691,VITVI05G00408,VITVI05G00623,VITVI05G00764,VITVI05G01320,VITVI05G00141,VITVI05G00113,VITVI05G00101,VITVI05…
GO:BP	sulfur compound biosynthetic process	GO:0044272	0.0100245	1.99894	132	1061	12	35134	VITVI01G00286,VITVI02G00326,VITVI04G01914,VITVI05G00242,VITVI06G04095,VITVI07G00307,VITVI08G01319,VITVI08G01809,VITVI11G00130,VITVI13G00699,VITVI18G00368,VITVI19G00654
GO:BP	protein modification by small protein conjugation or removal	GO:0070647	0.0100622	1.99731	571	1061	32	35134	VITVI00G04839,VITVI01G00192,VITVI01G00614,VITVI02G00043,VITVI02G00384,VITVI03G00139,VITVI03G00519,VITVI05G00408,VITVI05G00085,VITVI06G00501,VITVI06G00746,VITVI06G00979,VITVI07G00484,VITVI07G01826,VITVI07G00184,VITVI08G01201,VITVI08G00836,VITVI09G00012,VITVI11G00304,VITVI12G02128,VITVI13G01057,VITVI13G01483,VITVI14G00668,VITVI15G01417,VITVI15G01648,VITVI15G00842,VITVI17G00521,VITVI18G00546,VITVI18…
GO:BP	cell morphogenesis	GO:0000902	0.0105657	1.9761	115	1061	11	35134	VITVI03G00139,VITVI05G00287,VITVI05G00106,VITVI06G00113,VITVI07G00343,VITVI09G00162,VITVI11G00005,VITVI12G04069,VITVI14G01308,VITVI14G01330,VITVI15G00782
GO:BP	regulation of DNA-templated transcription	GO:0006355	0.0105657	1.9761	1952	1061	84	35134	VITVI10G00380,VITVI01G01680,VITVI01G00412,VITVI01G00427,VITVI01G00511,VITVI01G00545,VITVI01G02098,VITVI01G01040,VITVI02G00709,VITVI02G00759,VITVI02G00089,VITVI02G00329,VITVI02G00380,VITVI03G00559,VITVI04G00513,VITVI04G01252,VITVI04G01452,VITVI04G01714,VITVI04G00824,VITVI05G00239,VITVI05G00453,VITVI05G00496,VITVI05G01723,VITVI05G00166,VITVI05G00106,VITVI05G02135,VITVI06G00048,VITVI06G04095,VITVI06…
GO:BP	regulation of RNA biosynthetic process	GO:2001141	0.0105657	1.9761	1952	1061	84	35134	VITVI10G00380,VITVI01G01680,VITVI01G00412,VITVI01G00427,VITVI01G00511,VITVI01G00545,VITVI01G02098,VITVI01G01040,VITVI02G00709,VITVI02G00759,VITVI02G00089,VITVI02G00329,VITVI02G00380,VITVI03G00559,VITVI04G00513,VITVI04G01252,VITVI04G01452,VITVI04G01714,VITVI04G00824,VITVI05G00239,VITVI05G00453,VITVI05G00496,VITVI05G01723,VITVI05G00166,VITVI05G00106,VITVI05G02135,VITVI06G00048,VITVI06G04095,VITVI06…
GO:BP	macromolecule catabolic process	GO:0009057	0.0113466	1.94513	851	1061	43	35134	VITVI00G04508,VITVI01G00376,VITVI02G00617,VITVI02G00384,VITVI02G00553,VITVI03G00139,VITVI03G00530,VITVI03G00400,VITVI03G00539,VITVI05G01583,VITVI06G00501,VITVI06G00580,VITVI06G00746,VITVI06G00979,VITVI06G01070,VITVI06G01146,VITVI06G01268,VITVI07G00307,VITVI07G01826,VITVI08G01201,VITVI08G01645,VITVI08G00120,VITVI08G00125,VITVI09G00734,VITVI09G00793,VITVI03G04000,VITVI11G00923,VITVI11G00635,VITVI12…
GO:BP	monoatomic ion homeostasis	GO:0050801	0.0114884	1.93974	173	1061	14	35134	VITVI01G00108,VITVI01G01040,VITVI04G01225,VITVI05G00359,VITVI05G01655,VITVI07G02013,VITVI08G01172,VITVI08G01174,VITVI09G00189,VITVI10G00751,VITVI11G00419,VITVI15G00567,VITVI18G00643,VITVI19G00145
GO:BP	alcohol metabolic process	GO:0006066	0.0116037	1.93541	99	1061	10	35134	VITVI10G00383,VITVI02G00724,VITVI07G00307,VITVI08G01311,VITVI09G00691,VITVI10G00285,VITVI14G01480,VITVI18G00994,VITVI18G02381,VITVI19G00596
GO:BP	organic anion transport	GO:0015711	0.0116161	1.93494	214	1061	16	35134	VITVI07G04600,VITVI01G00343,VITVI06G04319,VITVI06G01331,VITVI06G01396,VITVI06G01462,VITVI08G01364,VITVI08G00152,VITVI10G00902,VITVI10G00037,VITVI13G01745,VITVI13G04284,VITVI14G01946,VITVI14G01951,VITVI14G00253,VITVI18G00004
GO:BP	RNA processing	GO:0006396	0.0116161	1.93494	879	1061	44	35134	VITVI01G01413,VITVI01G04062,VITVI01G00523,VITVI03G00308,VITVI04G00231,VITVI04G00613,VITVI04G01367,VITVI05G00421,VITVI06G01070,VITVI06G01268,VITVI07G00307,VITVI07G00335,VITVI07G00336,VITVI07G00442,VITVI07G01851,VITVI08G00097,VITVI08G00120,VITVI08G00644,VITVI09G00139,VITVI09G00277,VITVI10G00717,VITVI11G00024,VITVI11G00688,VITVI11G00923,VITVI11G01102,VITVI12G01869,VITVI12G02033,VITVI12G02126,VITVI12…
GO:BP	transmembrane transport	GO:0055085	0.0116161	1.93494	1627	1061	72	35134	VITVI10G01213,VITVI07G00071,VITVI04G02278,VITVI07G04600,VITVI01G00108,VITVI01G00343,VITVI01G00959,VITVI02G00617,VITVI02G00403,VITVI04G01225,VITVI04G00725,VITVI05G00359,VITVI05G00464,VITVI05G01655,VITVI06G00501,VITVI06G00740,VITVI06G04319,VITVI06G01331,VITVI06G01396,VITVI06G01950,VITVI06G01462,VITVI07G02266,VITVI07G00603,VITVI07G02013,VITVI08G01172,VITVI08G01174,VITVI08G01273,VITVI08G01364,VITVI08…
GO:BP	nucleobase-containing compound transport	GO:0015931	0.0119093	1.92411	155	1061	13	35134	VITVI01G00523,VITVI02G00411,VITVI03G00103,VITVI06G00017,VITVI06G01268,VITVI08G01364,VITVI08G01946,VITVI09G00061,VITVI09G00816,VITVI13G01745,VITVI14G00253,VITVI18G00004,VITVI19G01763
GO:BP	regulation of nucleobase-containing compound metabolic process	GO:0019219	0.0119093	1.92411	2105	1061	89	35134	VITVI10G00380,VITVI01G01680,VITVI01G00412,VITVI01G00427,VITVI01G00511,VITVI01G00545,VITVI01G02098,VITVI01G01040,VITVI02G00709,VITVI02G00759,VITVI02G00089,VITVI02G00329,VITVI02G00380,VITVI03G00559,VITVI04G00513,VITVI04G01252,VITVI04G01452,VITVI04G01714,VITVI04G00824,VITVI05G00239,VITVI05G00453,VITVI05G00496,VITVI05G01723,VITVI05G00166,VITVI05G00106,VITVI05G02135,VITVI06G00048,VITVI06G04095,VITVI06…
GO:BP	secondary metabolic process	GO:0019748	0.0119093	1.92411	215	1061	16	35134	VITVI13G00239,VITVI13G00238,VITVI07G02555,VITVI07G03083,VITVI02G00283,VITVI02G00326,VITVI06G01599,VITVI07G00286,VITVI07G00169,VITVI08G01787,VITVI09G01621,VITVI09G00427,VITVI12G00081,VITVI13G00509,VITVI14G01480,VITVI18G00137
GO:BP	organonitrogen compound metabolic process	GO:1901564	0.0119093	1.92411	5778	1061	213	35134	VITVI07G00062,VITVI10G00383,VITVI10G00185,VITVI04G04411,VITVI14G02411,VITVI10G02135,VITVI00G04508,VITVI10G00414,VITVI10G04302,VITVI00G04839,VITVI02G04129,VITVI01G01362,VITVI01G01439,VITVI01G00035,VITVI01G00038,VITVI01G00060,VITVI01G00163,VITVI01G00171,VITVI01G00182,VITVI01G00192,VITVI01G00286,VITVI01G04077,VITVI01G00376,VITVI01G00484,VITVI01G00568,VITVI01G00614,VITVI02G00617,VITVI02G00043,VITVI02…
GO:BP	gamma-aminobutyric acid transport	GO:0015812	0.012039	1.91941	2	1061	2	35134	VITVI01G00343,VITVI06G01396
GO:BP	cellular nitrogen compound biosynthetic process	GO:0044271	0.012222	1.91286	3408	1061	134	35134	VITVI10G00380,VITVI10G00383,VITVI10G00414,VITVI01G01413,VITVI01G01680,VITVI01G00060,VITVI01G00163,VITVI01G00171,VITVI01G00412,VITVI01G00427,VITVI01G00511,VITVI01G00545,VITVI01G02098,VITVI01G01040,VITVI02G00709,VITVI02G00759,VITVI02G00089,VITVI02G00188,VITVI02G00315,VITVI02G00326,VITVI02G00329,VITVI02G00380,VITVI03G00107,VITVI03G00559,VITVI04G00513,VITVI04G01252,VITVI04G01452,VITVI04G01714,VITVI04…
GO:BP	sulfur compound metabolic process	GO:0006790	0.0123037	1.90996	237	1061	17	35134	VITVI01G01374,VITVI01G00286,VITVI02G00326,VITVI04G01914,VITVI05G00242,VITVI06G04095,VITVI07G00307,VITVI08G01319,VITVI08G01461,VITVI08G01809,VITVI09G00287,VITVI11G00130,VITVI12G02139,VITVI13G00699,VITVI14G01221,VITVI18G00368,VITVI19G00654
GO:BP	regulation of secondary metabolic process	GO:0043455	0.0124973	1.90318	26	1061	5	35134	VITVI07G00169,VITVI08G01787,VITVI09G01621,VITVI09G00427,VITVI14G01480
GO:BP	monoatomic cation homeostasis	GO:0055080	0.0144883	1.83898	159	1061	13	35134	VITVI01G00108,VITVI01G01040,VITVI04G01225,VITVI05G00359,VITVI05G01655,VITVI07G02013,VITVI08G01172,VITVI08G01174,VITVI09G00189,VITVI10G00751,VITVI15G00567,VITVI18G00643,VITVI19G00145
GO:BP	protein targeting to vacuole	GO:0006623	0.0146717	1.83352	27	1061	5	35134	VITVI04G02278,VITVI05G00210,VITVI06G01364,VITVI07G04496,VITVI15G00009
GO:BP	vesicle-mediated transport to the plasma membrane	GO:0098876	0.0146717	1.83352	27	1061	5	35134	VITVI01G00376,VITVI06G04416,VITVI07G00343,VITVI09G01300,VITVI13G00659
GO:BP	embryo development ending in seed dormancy	GO:0009793	0.015368	1.81338	104	1061	10	35134	VITVI01G00836,VITVI06G00017,VITVI09G00430,VITVI14G04618,VITVI14G01480,VITVI14G02046,VITVI15G00650,VITVI18G00230,VITVI18G00250,VITVI19G01776
GO:BP	macromolecule modification	GO:0043412	0.0157317	1.80322	3642	1061	141	35134	VITVI04G04411,VITVI14G02411,VITVI10G02135,VITVI10G04302,VITVI00G04839,VITVI02G04129,VITVI01G01439,VITVI01G00038,VITVI01G00182,VITVI01G00192,VITVI01G04077,VITVI01G00484,VITVI01G00836,VITVI01G00614,VITVI02G00654,VITVI02G00043,VITVI02G00380,VITVI02G00384,VITVI02G01274,VITVI03G00139,VITVI03G00284,VITVI03G00308,VITVI03G00519,VITVI04G00513,VITVI04G01691,VITVI05G00408,VITVI05G00421,VITVI05G00623,VITVI05…
GO:BP	establishment of protein localization to vacuole	GO:0072666	0.0167916	1.77491	41	1061	6	35134	VITVI04G02278,VITVI01G00376,VITVI05G00210,VITVI06G01364,VITVI07G04496,VITVI15G00009
GO:BP	protein localization to vacuole	GO:0072665	0.0167916	1.77491	41	1061	6	35134	VITVI04G02278,VITVI01G00376,VITVI05G00210,VITVI06G01364,VITVI07G04496,VITVI15G00009
GO:BP	jasmonic acid biosynthetic process	GO:0009695	0.0167916	1.77491	8	1061	3	35134	VITVI01G00246,VITVI14G01246,VITVI18G00886
GO:BP	regulation of leaf senescence	GO:1900055	0.0167916	1.77491	8	1061	3	35134	VITVI13G00573,VITVI14G01221,VITVI18G00250
GO:BP	protein targeting	GO:0006605	0.0170799	1.76751	183	1061	14	35134	VITVI10G01213,VITVI04G04411,VITVI04G02278,VITVI02G04129,VITVI02G00617,VITVI05G00210,VITVI06G01364,VITVI07G00603,VITVI07G04496,VITVI11G01106,VITVI13G00659,VITVI14G00472,VITVI15G00009,VITVI18G00230
GO:BP	vesicle targeting	GO:0006903	0.0173659	1.7603	17	1061	4	35134	VITVI02G00699,VITVI04G00526,VITVI07G00343,VITVI13G00659
GO:BP	embryo development	GO:0009790	0.0181595	1.7409	107	1061	10	35134	VITVI01G00836,VITVI06G00017,VITVI09G00430,VITVI14G04618,VITVI14G01480,VITVI14G02046,VITVI15G00650,VITVI18G00230,VITVI18G00250,VITVI19G01776
GO:BP	regulation of pH	GO:0006885	0.0209216	1.6794	43	1061	6	35134	VITVI05G00359,VITVI08G01172,VITVI08G01174,VITVI09G00189,VITVI10G00751,VITVI15G00567
GO:BP	organonitrogen compound catabolic process	GO:1901565	0.0209216	1.6794	706	1061	36	35134	VITVI10G00185,VITVI00G04508,VITVI01G00376,VITVI01G00568,VITVI02G00617,VITVI02G00384,VITVI03G00139,VITVI03G00530,VITVI03G00892,VITVI03G00539,VITVI05G01314,VITVI05G01583,VITVI06G00501,VITVI06G00746,VITVI06G00979,VITVI06G01146,VITVI07G01826,VITVI08G01201,VITVI08G01311,VITVI08G00125,VITVI09G00734,VITVI09G00793,VITVI03G04000,VITVI11G01376,VITVI11G00635,VITVI12G01904,VITVI12G02758,VITVI13G01057,VITVI13…
GO:BP	nuclear-transcribed mRNA catabolic process, nonsense-mediated decay	GO:0000184	0.0212785	1.67206	18	1061	4	35134	VITVI03G00400,VITVI06G00580,VITVI06G01268,VITVI08G01645
GO:BP	phosphorus metabolic process	GO:0006793	0.021834	1.66087	2853	1061	113	35134	VITVI07G00062,VITVI10G00383,VITVI10G00336,VITVI14G02411,VITVI10G02135,VITVI10G04302,VITVI01G01362,VITVI01G01439,VITVI01G00038,VITVI01G00056,VITVI01G00182,VITVI01G04077,VITVI02G00724,VITVI02G00188,VITVI02G00315,VITVI02G00380,VITVI03G00284,VITVI03G00400,VITVI03G00358,VITVI04G01452,VITVI04G01565,VITVI04G01691,VITVI05G00623,VITVI05G00764,VITVI05G01314,VITVI05G01320,VITVI05G00141,VITVI05G00113,VITVI05…
GO:BP	threonine biosynthetic process	GO:0009088	0.0234641	1.6296	9	1061	3	35134	VITVI04G01914,VITVI11G00130,VITVI14G01472
GO:BP	regulation of nitrogen compound metabolic process	GO:0051171	0.0237473	1.62439	2396	1061	97	35134	VITVI10G00380,VITVI01G01680,VITVI01G00412,VITVI01G00427,VITVI01G00511,VITVI01G00545,VITVI01G02098,VITVI01G01040,VITVI02G00709,VITVI02G00759,VITVI02G00089,VITVI02G00329,VITVI02G00380,VITVI03G00559,VITVI04G00513,VITVI04G00550,VITVI04G01252,VITVI04G01452,VITVI04G01714,VITVI04G00824,VITVI05G00239,VITVI05G00453,VITVI05G00496,VITVI05G01723,VITVI05G01344,VITVI05G00166,VITVI05G00106,VITVI05G01493,VITVI05…
GO:BP	modification-dependent macromolecule catabolic process	GO:0043632	0.0242218	1.61579	440	1061	25	35134	VITVI01G00376,VITVI02G00384,VITVI03G00139,VITVI03G00530,VITVI06G00501,VITVI06G00746,VITVI06G00979,VITVI06G01146,VITVI07G01826,VITVI08G01201,VITVI08G00120,VITVI08G00125,VITVI09G00734,VITVI09G00793,VITVI03G04000,VITVI13G01057,VITVI13G01483,VITVI14G00668,VITVI14G01303,VITVI15G00842,VITVI17G00435,VITVI18G00303,VITVI19G04008,VITVI19G00317,VITVI19G00434
GO:BP	nucleobase-containing compound catabolic process	GO:0034655	0.0250108	1.60187	151	1061	12	35134	VITVI03G00400,VITVI05G01314,VITVI06G00580,VITVI06G01070,VITVI06G01268,VITVI07G00307,VITVI08G01645,VITVI08G00120,VITVI11G01376,VITVI11G00923,VITVI12G01868,VITVI18G00303
GO:BP	post-embryonic plant organ development	GO:0090696	0.0250589	1.60104	31	1061	5	35134	VITVI01G01680,VITVI02G00617,VITVI07G00496,VITVI07G00217,VITVI14G01330
GO:BP	response to cadmium ion	GO:0046686	0.0252609	1.59755	19	1061	4	35134	VITVI02G00326,VITVI03G01173,VITVI08G01483,VITVI19G01776
GO:BP	response to stress	GO:0006950	0.0255	1.59346	2462	1061	99	35134	VITVI07G00073,VITVI13G00239,VITVI07G02734,VITVI10G04302,VITVI01G01499,VITVI01G02224,VITVI01G01680,VITVI01G00474,VITVI01G00511,VITVI01G00793,VITVI01G00836,VITVI01G00959,VITVI01G01040,VITVI02G00634,VITVI02G00048,VITVI02G00326,VITVI02G00411,VITVI03G01856,VITVI03G01011,VITVI03G01481,VITVI03G00530,VITVI03G00492,VITVI03G00541,VITVI04G00231,VITVI04G01452,VITVI05G00408,VITVI05G00469,VITVI05G01314,VITVI05…
GO:BP	phenylpropanoid metabolic process	GO:0009698	0.0269708	1.56911	153	1061	12	35134	VITVI13G00239,VITVI13G00238,VITVI07G02555,VITVI07G03083,VITVI02G00283,VITVI06G01599,VITVI07G00169,VITVI08G01787,VITVI09G01621,VITVI09G00427,VITVI13G00509,VITVI18G00137
GO:BP	lipid modification	GO:0030258	0.0269708	1.56911	114	1061	10	35134	VITVI10G00383,VITVI02G01726,VITVI04G01565,VITVI07G00105,VITVI11G00026,VITVI11G01318,VITVI13G00731,VITVI14G00253,VITVI17G00683,VITVI19G00305
GO:BP	export from cell	GO:0140352	0.0269708	1.56911	153	1061	12	35134	VITVI10G00385,VITVI02G00403,VITVI06G00397,VITVI07G00343,VITVI08G00187,VITVI08G00078,VITVI09G00189,VITVI09G01300,VITVI13G00659,VITVI14G01062,VITVI15G00567,VITVI19G00025
GO:BP	response to carbohydrate	GO:0009743	0.0274273	1.56182	46	1061	6	35134	VITVI01G01499,VITVI02G00048,VITVI02G00326,VITVI05G01344,VITVI08G00835,VITVI11G00796
GO:BP	phosphate-containing compound metabolic process	GO:0006796	0.0274273	1.56182	2821	1061	111	35134	VITVI07G00062,VITVI10G00383,VITVI10G00336,VITVI14G02411,VITVI10G02135,VITVI10G04302,VITVI01G01362,VITVI01G01439,VITVI01G00038,VITVI01G00056,VITVI01G00182,VITVI01G04077,VITVI02G00724,VITVI02G00188,VITVI02G00315,VITVI02G00380,VITVI03G00284,VITVI03G00400,VITVI03G00358,VITVI04G01452,VITVI04G01565,VITVI04G01691,VITVI05G00623,VITVI05G00764,VITVI05G01314,VITVI05G01320,VITVI05G00141,VITVI05G00113,VITVI05…
GO:BP	response to oxygen-containing compound	GO:1901700	0.0274273	1.56182	544	1061	29	35134	VITVI01G01499,VITVI02G00048,VITVI02G00326,VITVI03G01481,VITVI03G00570,VITVI04G01252,VITVI05G00469,VITVI05G01723,VITVI05G01344,VITVI06G01268,VITVI07G01989,VITVI07G00217,VITVI07G01598,VITVI08G00835,VITVI08G00836,VITVI09G00064,VITVI09G00430,VITVI10G00659,VITVI11G00796,VITVI13G00055,VITVI14G00167,VITVI14G01394,VITVI14G01480,VITVI14G02541,VITVI15G01020,VITVI16G01510,VITVI17G00153,VITVI18G00250,VITVI18…
GO:BP	epigenetic regulation of gene expression	GO:0040029	0.0281941	1.54984	62	1061	7	35134	VITVI06G04090,VITVI06G00477,VITVI07G02048,VITVI08G01767,VITVI11G00367,VITVI14G01787,VITVI19G01756
GO:BP	multivesicular body organization	GO:0036257	0.0286956	1.54218	3	1061	2	35134	VITVI01G00376,VITVI04G04396
GO:BP	actin filament severing	GO:0051014	0.0286956	1.54218	3	1061	2	35134	VITVI08G01924,VITVI11G01212
GO:BP	regulation of phenylpropanoid metabolic process	GO:2000762	0.0287542	1.5413	20	1061	4	35134	VITVI07G00169,VITVI08G01787,VITVI09G01621,VITVI09G00427
GO:BP	carboxylic acid transmembrane transport	GO:1905039	0.0287542	1.5413	116	1061	10	35134	VITVI07G04600,VITVI01G00343,VITVI06G04319,VITVI06G01331,VITVI06G01396,VITVI08G00152,VITVI10G00902,VITVI10G00037,VITVI14G01946,VITVI14G01951
GO:BP	organic cyclic compound catabolic process	GO:1901361	0.0287542	1.5413	262	1061	17	35134	VITVI10G00185,VITVI03G00400,VITVI03G00892,VITVI05G01314,VITVI06G00580,VITVI06G01070,VITVI06G01268,VITVI07G00307,VITVI08G01645,VITVI08G00120,VITVI11G01376,VITVI11G00923,VITVI12G01868,VITVI12G02758,VITVI13G00509,VITVI18G00137,VITVI18G00303
GO:BP	organic acid transmembrane transport	GO:1903825	0.0287542	1.5413	116	1061	10	35134	VITVI07G04600,VITVI01G00343,VITVI06G04319,VITVI06G01331,VITVI06G01396,VITVI08G00152,VITVI10G00902,VITVI10G00037,VITVI14G01946,VITVI14G01951
GO:BP	lateral root development	GO:0048527	0.0287542	1.5413	20	1061	4	35134	VITVI01G01680,VITVI02G00617,VITVI07G00496,VITVI14G01330
GO:BP	carbohydrate metabolic process	GO:0005975	0.0288927	1.53921	1178	1061	53	35134	VITVI07G00062,VITVI07G02498,VITVI10G00455,VITVI00G04508,VITVI15G04535,VITVI00G04705,VITVI01G01362,VITVI01G00793,VITVI02G00553,VITVI03G00009,VITVI03G00535,VITVI03G00400,VITVI03G00581,VITVI04G00318,VITVI04G01701,VITVI04G00748,VITVI05G00469,VITVI05G02111,VITVI05G00164,VITVI05G00161,VITVI05G01583,VITVI06G00021,VITVI06G00113,VITVI07G04159,VITVI07G00217,VITVI08G01832,VITVI09G00570,VITVI09G00691,VITVI10…
GO:BP	protein localization to Golgi apparatus	GO:0034067	0.0290152	1.53738	10	1061	3	35134	VITVI05G00210,VITVI07G04496,VITVI15G00009
GO:BP	establishment of vesicle localization	GO:0051650	0.0290552	1.53678	33	1061	5	35134	VITVI02G00699,VITVI04G00526,VITVI07G00343,VITVI09G00162,VITVI13G00659
GO:BP	vesicle localization	GO:0051648	0.0290552	1.53678	33	1061	5	35134	VITVI02G00699,VITVI04G00526,VITVI07G00343,VITVI09G00162,VITVI13G00659
GO:BP	small molecule biosynthetic process	GO:0044283	0.0290552	1.53678	574	1061	30	35134	VITVI10G00380,VITVI10G00383,VITVI07G02896,VITVI01G00035,VITVI01G00178,VITVI01G00246,VITVI01G00286,VITVI04G00318,VITVI04G01914,VITVI07G00307,VITVI08G01311,VITVI08G01319,VITVI09G00214,VITVI09G01297,VITVI10G00285,VITVI11G00130,VITVI11G00393,VITVI14G01472,VITVI14G01480,VITVI14G01246,VITVI15G00079,VITVI15G00782,VITVI18G00368,VITVI18G00490,VITVI18G00496,VITVI18G00674,VITVI18G00886,VITVI18G00994,VITVI18…
GO:BP	organic acid metabolic process	GO:0006082	0.0290552	1.53678	965	1061	45	35134	VITVI07G00062,VITVI10G00380,VITVI10G00185,VITVI07G02896,VITVI02G01726,VITVI01G01362,VITVI01G00035,VITVI01G00246,VITVI01G00286,VITVI01G00568,VITVI02G00315,VITVI02G00326,VITVI03G00892,VITVI04G00009,VITVI04G00318,VITVI04G01914,VITVI05G01493,VITVI06G00021,VITVI08G01311,VITVI08G01319,VITVI09G00214,VITVI09G00342,VITVI09G01297,VITVI10G00055,VITVI11G00130,VITVI11G00237,VITVI11G00318,VITVI11G00393,VITVI12…
GO:BP	regulation of primary metabolic process	GO:0080090	0.0290552	1.53678	2454	1061	98	35134	VITVI10G00380,VITVI01G01680,VITVI01G00412,VITVI01G00427,VITVI01G00511,VITVI01G00545,VITVI01G02098,VITVI01G01040,VITVI02G00709,VITVI02G00759,VITVI02G00089,VITVI02G00329,VITVI02G00380,VITVI03G00559,VITVI04G00513,VITVI04G01252,VITVI04G01452,VITVI04G01714,VITVI04G00824,VITVI05G00239,VITVI05G00453,VITVI05G00496,VITVI05G01723,VITVI05G01344,VITVI05G00166,VITVI05G00106,VITVI05G01493,VITVI05G02135,VITVI06…
GO:BP	peroxisome organization	GO:0007031	0.0290552	1.53678	33	1061	5	35134	VITVI10G01213,VITVI02G00617,VITVI08G02314,VITVI08G02315,VITVI14G00253
GO:BP	oxoacid metabolic process	GO:0043436	0.0290552	1.53678	964	1061	45	35134	VITVI07G00062,VITVI10G00380,VITVI10G00185,VITVI07G02896,VITVI02G01726,VITVI01G01362,VITVI01G00035,VITVI01G00246,VITVI01G00286,VITVI01G00568,VITVI02G00315,VITVI02G00326,VITVI03G00892,VITVI04G00009,VITVI04G00318,VITVI04G01914,VITVI05G01493,VITVI06G00021,VITVI08G01311,VITVI08G01319,VITVI09G00214,VITVI09G00342,VITVI09G01297,VITVI10G00055,VITVI11G00130,VITVI11G00237,VITVI11G00318,VITVI11G00393,VITVI12…
GO:BP	dicarboxylic acid transport	GO:0006835	0.0290552	1.53678	33	1061	5	35134	VITVI07G04600,VITVI01G00343,VITVI06G01462,VITVI10G00902,VITVI13G04284
GO:BP	response to lipid	GO:0033993	0.0297258	1.52687	287	1061	18	35134	VITVI01G01499,VITVI02G00326,VITVI03G01481,VITVI03G00570,VITVI04G01252,VITVI05G00469,VITVI05G01344,VITVI06G01268,VITVI07G00217,VITVI08G00835,VITVI09G00064,VITVI13G00055,VITVI14G01394,VITVI14G01480,VITVI16G01510,VITVI17G00153,VITVI18G00250,VITVI18G00496
GO:BP	plant epidermis development	GO:0090558	0.0305173	1.51545	64	1061	7	35134	VITVI01G01680,VITVI03G00139,VITVI05G00287,VITVI09G00162,VITVI15G00876,VITVI17G00344,VITVI18G00250
GO:BP	lipid metabolic process	GO:0006629	0.0305173	1.51545	1076	1061	49	35134	VITVI10G00383,VITVI07G02896,VITVI02G01726,VITVI10G00414,VITVI01G00178,VITVI01G00246,VITVI02G00377,VITVI03G00358,VITVI03G00570,VITVI04G01565,VITVI07G01767,VITVI07G00039,VITVI07G00105,VITVI08G01311,VITVI08G01319,VITVI09G00076,VITVI09G00342,VITVI09G00691,VITVI10G00764,VITVI10G00285,VITVI11G00026,VITVI11G00128,VITVI11G00153,VITVI11G00266,VITVI11G00393,VITVI11G00447,VITVI11G01318,VITVI12G01866,VITVI12…
GO:BP	cellular catabolic process	GO:0044248	0.0305246	1.51535	654	1061	33	35134	VITVI10G00185,VITVI07G01345,VITVI02G01726,VITVI01G01362,VITVI01G00568,VITVI02G00634,VITVI03G00492,VITVI03G00400,VITVI03G00892,VITVI04G00748,VITVI05G01314,VITVI06G00580,VITVI06G01070,VITVI06G01268,VITVI06G01364,VITVI07G00286,VITVI07G00307,VITVI08G01267,VITVI08G01311,VITVI08G01645,VITVI08G02314,VITVI08G02315,VITVI08G00120,VITVI11G01376,VITVI11G00923,VITVI12G00081,VITVI12G01868,VITVI12G02758,VITVI12…
GO:BP	nucleobase-containing small molecule metabolic process	GO:0055086	0.0306715	1.51326	358	1061	21	35134	VITVI01G01362,VITVI02G00188,VITVI02G00315,VITVI03G00892,VITVI05G01314,VITVI06G00236,VITVI08G01319,VITVI08G01873,VITVI08G00676,VITVI09G00093,VITVI11G01376,VITVI11G00304,VITVI12G01904,VITVI13G01645,VITVI14G01605,VITVI18G00368,VITVI18G00490,VITVI18G00674,VITVI19G00025,VITVI19G00905,VITVI19G01776
GO:BP	plant organ senescence	GO:0090693	0.0320183	1.4946	34	1061	5	35134	VITVI03G00492,VITVI13G00573,VITVI14G01221,VITVI16G01370,VITVI18G00250
GO:BP	leaf senescence	GO:0010150	0.0320183	1.4946	34	1061	5	35134	VITVI03G00492,VITVI13G00573,VITVI14G01221,VITVI16G01370,VITVI18G00250
GO:BP	cellular nitrogen compound catabolic process	GO:0044270	0.032179	1.49243	180	1061	13	35134	VITVI03G00400,VITVI03G00892,VITVI05G01314,VITVI06G00580,VITVI06G01070,VITVI06G01268,VITVI07G00307,VITVI08G01645,VITVI08G00120,VITVI11G01376,VITVI11G00923,VITVI12G01868,VITVI18G00303
GO:BP	RNA catabolic process	GO:0006401	0.0334149	1.47606	120	1061	10	35134	VITVI03G00400,VITVI06G00580,VITVI06G01070,VITVI06G01268,VITVI07G00307,VITVI08G01645,VITVI08G00120,VITVI11G00923,VITVI12G01868,VITVI18G00303
GO:BP	heterocycle catabolic process	GO:0046700	0.0334149	1.47606	181	1061	13	35134	VITVI03G00400,VITVI03G00892,VITVI05G01314,VITVI06G00580,VITVI06G01070,VITVI06G01268,VITVI07G00307,VITVI08G01645,VITVI08G00120,VITVI11G01376,VITVI11G00923,VITVI12G01868,VITVI18G00303
GO:BP	monocarboxylic acid metabolic process	GO:0032787	0.0339734	1.46886	410	1061	23	35134	VITVI07G00062,VITVI10G00380,VITVI07G02896,VITVI02G01726,VITVI01G01362,VITVI01G00246,VITVI04G00009,VITVI06G00021,VITVI08G01311,VITVI08G01319,VITVI09G00342,VITVI11G00237,VITVI11G00393,VITVI14G01480,VITVI14G01246,VITVI14G00253,VITVI14G02541,VITVI14G01600,VITVI18G00368,VITVI18G00496,VITVI18G04156,VITVI18G00886,VITVI18G01231
GO:BP	carboxylic acid metabolic process	GO:0019752	0.0342404	1.46546	950	1061	44	35134	VITVI07G00062,VITVI10G00380,VITVI10G00185,VITVI07G02896,VITVI02G01726,VITVI01G01362,VITVI01G00035,VITVI01G00246,VITVI01G00286,VITVI01G00568,VITVI02G00315,VITVI03G00892,VITVI04G00009,VITVI04G00318,VITVI04G01914,VITVI05G01493,VITVI06G00021,VITVI08G01311,VITVI08G01319,VITVI09G00214,VITVI09G00342,VITVI09G01297,VITVI10G00055,VITVI11G00130,VITVI11G00237,VITVI11G00318,VITVI11G00393,VITVI12G02758,VITVI13…
GO:BP	threonine metabolic process	GO:0006566	0.0350838	1.45489	11	1061	3	35134	VITVI04G01914,VITVI11G00130,VITVI14G01472
GO:BP	maturation of 5.8S rRNA	GO:0000460	0.0350838	1.45489	35	1061	5	35134	VITVI03G00308,VITVI06G01070,VITVI08G00120,VITVI11G00923,VITVI14G00746
GO:BP	vesicle docking	GO:0048278	0.0350838	1.45489	35	1061	5	35134	VITVI10G00385,VITVI07G00343,VITVI08G00187,VITVI13G00659,VITVI14G00125
GO:BP	phosphatidylinositol dephosphorylation	GO:0046856	0.0359465	1.44434	22	1061	4	35134	VITVI04G01565,VITVI07G00105,VITVI11G00026,VITVI13G00731
GO:BP	transcription by RNA polymerase II	GO:0006366	0.0362573	1.4406	562	1061	29	35134	VITVI01G01680,VITVI01G00412,VITVI01G00511,VITVI01G02098,VITVI02G00709,VITVI03G00559,VITVI04G00513,VITVI05G00239,VITVI05G00453,VITVI05G00106,VITVI05G02135,VITVI06G00048,VITVI06G01262,VITVI08G01354,VITVI08G01513,VITVI10G00497,VITVI11G01319,VITVI11G00601,VITVI12G00313,VITVI12G00328,VITVI13G00573,VITVI13G01420,VITVI15G01212,VITVI15G00876,VITVI17G00161,VITVI17G00376,VITVI17G00614,VITVI18G00167,VITVI19…
GO:BP	carboxylic acid transport	GO:0046942	0.0369366	1.43254	163	1061	12	35134	VITVI07G04600,VITVI01G00343,VITVI06G04319,VITVI06G01331,VITVI06G01396,VITVI06G01462,VITVI08G00152,VITVI10G00902,VITVI10G00037,VITVI13G04284,VITVI14G01946,VITVI14G01951
GO:BP	organic acid transport	GO:0015849	0.0369366	1.43254	163	1061	12	35134	VITVI07G04600,VITVI01G00343,VITVI06G04319,VITVI06G01331,VITVI06G01396,VITVI06G01462,VITVI08G00152,VITVI10G00902,VITVI10G00037,VITVI13G04284,VITVI14G01946,VITVI14G01951
GO:BP	organophosphate biosynthetic process	GO:0090407	0.0379659	1.42061	391	1061	22	35134	VITVI02G00188,VITVI02G00315,VITVI03G00358,VITVI06G00236,VITVI07G00307,VITVI08G01319,VITVI08G01873,VITVI08G00676,VITVI09G00691,VITVI10G00285,VITVI11G00026,VITVI11G00128,VITVI11G00447,VITVI12G01866,VITVI15G00810,VITVI18G04730,VITVI18G00368,VITVI18G00490,VITVI18G00674,VITVI18G00994,VITVI19G00905,VITVI19G01776
GO:BP	regulation of small molecule metabolic process	GO:0062012	0.0386664	1.41267	36	1061	5	35134	VITVI10G00380,VITVI05G01493,VITVI14G01221,VITVI14G01480,VITVI18G00496
GO:BP	cellular lipid metabolic process	GO:0044255	0.0396546	1.40171	774	1061	37	35134	VITVI10G00383,VITVI07G02896,VITVI02G01726,VITVI10G00414,VITVI01G00178,VITVI01G00246,VITVI03G00358,VITVI04G01565,VITVI07G00105,VITVI08G01311,VITVI08G01319,VITVI09G00342,VITVI09G00691,VITVI10G00285,VITVI11G00026,VITVI11G00128,VITVI11G00153,VITVI11G00266,VITVI11G00393,VITVI11G00447,VITVI11G01318,VITVI12G01866,VITVI13G00731,VITVI14G01480,VITVI14G01246,VITVI14G00253,VITVI14G02541,VITVI15G00079,VITVI15…
GO:BP	growth	GO:0040007	0.0396546	1.40171	186	1061	13	35134	VITVI05G00903,VITVI07G00343,VITVI08G01924,VITVI09G01501,VITVI09G00162,VITVI14G00167,VITVI14G01330,VITVI15G00782,VITVI17G00344,VITVI18G00250,VITVI18G00251,VITVI18G00546,VITVI18G01170
GO:BP	polyol biosynthetic process	GO:0046173	0.0400747	1.39713	23	1061	4	35134	VITVI10G00383,VITVI08G01311,VITVI10G00285,VITVI18G00994
GO:BP	post-embryonic root development	GO:0048528	0.0400747	1.39713	23	1061	4	35134	VITVI01G01680,VITVI02G00617,VITVI07G00496,VITVI14G01330
GO:BP	maintenance of protein location	GO:0045185	0.0400747	1.39713	23	1061	4	35134	VITVI05G00210,VITVI07G01688,VITVI07G04496,VITVI15G00009
GO:BP	lipid phosphorylation	GO:0046834	0.0400747	1.39713	23	1061	4	35134	VITVI10G00383,VITVI11G01318,VITVI17G00683,VITVI19G00305
GO:BP	maintenance of protein location in cell	GO:0032507	0.0400747	1.39713	23	1061	4	35134	VITVI05G00210,VITVI07G01688,VITVI07G04496,VITVI15G00009
GO:BP	aromatic compound catabolic process	GO:0019439	0.0400747	1.39713	253	1061	16	35134	VITVI10G00185,VITVI03G00400,VITVI05G01314,VITVI06G00580,VITVI06G01070,VITVI06G01268,VITVI07G00307,VITVI08G01645,VITVI08G00120,VITVI11G01376,VITVI11G00923,VITVI12G01868,VITVI12G02758,VITVI13G00509,VITVI18G00137,VITVI18G00303
GO:BP	amino acid transmembrane transport	GO:0003333	0.0414323	1.38266	87	1061	8	35134	VITVI01G00343,VITVI06G04319,VITVI06G01331,VITVI06G01396,VITVI08G00152,VITVI10G00902,VITVI14G01946,VITVI14G01951
GO:BP	response to glucose	GO:0009749	0.0420793	1.37593	12	1061	3	35134	VITVI01G01499,VITVI05G01344,VITVI08G00835
GO:BP	cellular response to osmotic stress	GO:0071470	0.0420793	1.37593	12	1061	3	35134	VITVI02G00048,VITVI05G00408,VITVI07G00184
GO:BP	L-lysine transport	GO:1902022	0.0431724	1.36479	4	1061	2	35134	VITVI01G00343,VITVI10G00902
GO:BP	nuclear-transcribed mRNA catabolic process	GO:0000956	0.0431724	1.36479	70	1061	7	35134	VITVI03G00400,VITVI06G00580,VITVI06G01268,VITVI07G00307,VITVI08G01645,VITVI08G00120,VITVI18G00303
GO:BP	L-glutamate transmembrane transport	GO:0015813	0.0431724	1.36479	4	1061	2	35134	VITVI01G00343,VITVI10G00902
GO:BP	regulation of cytoplasmic transport	GO:1903649	0.0431724	1.36479	4	1061	2	35134	VITVI05G01120,VITVI11G00387
GO:BP	L-lysine transmembrane transport	GO:1903401	0.0431724	1.36479	4	1061	2	35134	VITVI01G00343,VITVI10G00902
GO:BP	regulation of early endosome to late endosome transport	GO:2000641	0.0431724	1.36479	4	1061	2	35134	VITVI05G01120,VITVI11G00387
GO:BP	L-glutamate import	GO:0051938	0.0431724	1.36479	4	1061	2	35134	VITVI01G00343,VITVI10G00902
GO:BP	vesicle tethering	GO:0099022	0.0431724	1.36479	4	1061	2	35134	VITVI07G00343,VITVI13G00659
GO:BP	vesicle tethering involved in exocytosis	GO:0090522	0.0431724	1.36479	4	1061	2	35134	VITVI07G00343,VITVI13G00659
GO:BP	mRNA processing	GO:0006397	0.0439919	1.35663	375	1061	21	35134	VITVI01G04062,VITVI01G00523,VITVI04G00613,VITVI06G01268,VITVI07G00307,VITVI08G00097,VITVI09G00139,VITVI09G00277,VITVI10G00717,VITVI11G00024,VITVI11G00688,VITVI12G01869,VITVI12G02126,VITVI14G01151,VITVI15G01649,VITVI16G01348,VITVI17G00882,VITVI18G00576,VITVI18G00624,VITVI18G00069,VITVI19G00118
GO:BP	phospholipid dephosphorylation	GO:0046839	0.04425	1.35409	24	1061	4	35134	VITVI04G01565,VITVI07G00105,VITVI11G00026,VITVI13G00731
GO:BP	RNA export from nucleus	GO:0006405	0.045653	1.34053	54	1061	6	35134	VITVI01G00523,VITVI06G00017,VITVI06G01268,VITVI08G01946,VITVI09G00061,VITVI19G01763
GO:BP	response to abscisic acid	GO:0009737	0.0479983	1.31877	171	1061	12	35134	VITVI01G01499,VITVI03G01481,VITVI05G00469,VITVI05G01344,VITVI06G01268,VITVI08G00835,VITVI14G01394,VITVI14G01480,VITVI16G01510,VITVI17G00153,VITVI18G00250,VITVI18G00496
GO:BP	response to alcohol	GO:0097305	0.0479983	1.31877	171	1061	12	35134	VITVI01G01499,VITVI03G01481,VITVI05G00469,VITVI05G01344,VITVI06G01268,VITVI08G00835,VITVI14G01394,VITVI14G01480,VITVI16G01510,VITVI17G00153,VITVI18G00250,VITVI18G00496
GO:BP	proteolysis involved in protein catabolic process	GO:0051603	0.0482986	1.31607	503	1061	26	35134	VITVI01G00376,VITVI02G00617,VITVI02G00384,VITVI03G00139,VITVI03G00530,VITVI03G00539,VITVI06G00501,VITVI06G00746,VITVI06G00979,VITVI06G01146,VITVI07G01826,VITVI08G01201,VITVI08G00125,VITVI09G00734,VITVI09G00793,VITVI03G04000,VITVI12G01904,VITVI13G01057,VITVI13G01483,VITVI14G00668,VITVI14G01303,VITVI15G00842,VITVI17G00435,VITVI19G04008,VITVI19G00317,VITVI19G00434
GO:BP	exocytosis	GO:0006887	0.0491558	1.30842	55	1061	6	35134	VITVI10G00385,VITVI06G00397,VITVI07G00343,VITVI08G00187,VITVI09G01300,VITVI13G00659
GO:BP	response to hexose	GO:0009746	0.0492399	1.30768	13	1061	3	35134	VITVI01G01499,VITVI05G01344,VITVI08G00835
GO:BP	response to monosaccharide	GO:0034284	0.0492399	1.30768	13	1061	3	35134	VITVI01G01499,VITVI05G01344,VITVI08G00835
GO:BP	negative regulation of cytokinin-activated signaling pathway	GO:0080037	0.0492399	1.30768	13	1061	3	35134	VITVI08G01787,VITVI09G01621,VITVI09G00427
GO:BP	protein modification by small protein conjugation	GO:0032446	0.0492399	1.30768	479	1061	25	35134	VITVI00G04839,VITVI01G00192,VITVI01G00614,VITVI02G00043,VITVI02G00384,VITVI03G00139,VITVI03G00519,VITVI05G00408,VITVI06G00501,VITVI06G00746,VITVI07G00484,VITVI07G01826,VITVI07G00184,VITVI08G01201,VITVI08G00836,VITVI09G00012,VITVI11G00304,VITVI12G02128,VITVI13G01483,VITVI14G00668,VITVI15G01417,VITVI15G01648,VITVI15G00842,VITVI18G00546,VITVI19G00434
GO:BP	sphingolipid biosynthetic process	GO:0030148	0.0494043	1.30624	25	1061	4	35134	VITVI10G00383,VITVI10G00414,VITVI08G01311,VITVI11G00266
GO:CC	cellular anatomical entity	GO:0110165	2.13e-39	38.6716	17432	1061	741	35134	VITVI10G01213,VITVI07G00073,VITVI07G00071,VITVI07G00062,VITVI00G04581,VITVI10G00380,VITVI10G00383,VITVI10G04259,VITVI10G00185,VITVI10G00336,VITVI10G00345,VITVI07G02881,VITVI07G02896,VITVI13G01243,VITVI10G00455,VITVI10G00399,VITVI04G04411,VITVI07G01363,VITVI14G02411,VITVI13G00239,VITVI13G00238,VITVI10G02135,VITVI10G02343,VITVI07G04656,VITVI07G01345,VITVI02G01726,VITVI10G00385,VITVI04G02278,VITVI00…
GO:CC	cellular_component	GO:0005575	4.83e-39	38.3161	17597	1061	744	35134	VITVI10G01213,VITVI07G00073,VITVI07G00071,VITVI07G00062,VITVI00G04581,VITVI10G00380,VITVI10G00383,VITVI10G04259,VITVI10G00185,VITVI10G00336,VITVI10G00345,VITVI07G02881,VITVI07G02896,VITVI13G01243,VITVI10G00455,VITVI10G00399,VITVI04G04411,VITVI07G01363,VITVI14G02411,VITVI13G00239,VITVI13G00238,VITVI10G02135,VITVI10G02343,VITVI07G04656,VITVI07G01345,VITVI02G01726,VITVI10G00385,VITVI04G02278,VITVI00…
GO:CC	intracellular anatomical structure	GO:0005622	3.09e-34	33.5099	10380	1061	505	35134	VITVI10G01213,VITVI07G00071,VITVI07G00062,VITVI10G00380,VITVI10G00383,VITVI10G04259,VITVI10G00345,VITVI07G02896,VITVI10G00455,VITVI10G00399,VITVI04G04411,VITVI07G01363,VITVI13G00239,VITVI10G02343,VITVI07G04656,VITVI02G01726,VITVI10G00385,VITVI10G00414,VITVI10G04302,VITVI00G04839,VITVI02G04129,VITVI07G04600,VITVI01G01362,VITVI01G01374,VITVI01G01413,VITVI01G01418,VITVI01G01499,VITVI01G01646,VITVI01…
GO:CC	membrane-bounded organelle	GO:0043227	2.34e-22	21.6304	8046	1061	387	35134	VITVI10G01213,VITVI07G00071,VITVI07G00062,VITVI10G00380,VITVI10G00383,VITVI10G04259,VITVI10G00345,VITVI07G02896,VITVI10G00455,VITVI10G00399,VITVI04G04411,VITVI13G00239,VITVI10G02343,VITVI02G01726,VITVI10G00414,VITVI10G04302,VITVI00G04839,VITVI02G04129,VITVI07G04600,VITVI01G01374,VITVI01G01413,VITVI01G01499,VITVI01G01646,VITVI01G01680,VITVI01G00103,VITVI01G00176,VITVI01G00178,VITVI01G00190,VITVI01…
GO:CC	intracellular membrane-bounded organelle	GO:0043231	9.07e-22	21.0422	7998	1061	383	35134	VITVI10G01213,VITVI07G00071,VITVI07G00062,VITVI10G00380,VITVI10G00383,VITVI10G04259,VITVI10G00345,VITVI07G02896,VITVI10G00455,VITVI10G00399,VITVI04G04411,VITVI13G00239,VITVI10G02343,VITVI02G01726,VITVI10G00414,VITVI10G04302,VITVI00G04839,VITVI02G04129,VITVI07G04600,VITVI01G01374,VITVI01G01413,VITVI01G01499,VITVI01G01646,VITVI01G01680,VITVI01G00103,VITVI01G00176,VITVI01G00178,VITVI01G00190,VITVI01…
GO:CC	organelle	GO:0043226	2.7e-21	20.5685	8827	1061	410	35134	VITVI10G01213,VITVI07G00071,VITVI07G00062,VITVI10G00380,VITVI10G00383,VITVI10G04259,VITVI10G00345,VITVI07G02896,VITVI10G00455,VITVI10G00399,VITVI04G04411,VITVI13G00239,VITVI10G02343,VITVI07G04656,VITVI02G01726,VITVI10G00414,VITVI10G04302,VITVI00G04839,VITVI02G04129,VITVI07G04600,VITVI01G01374,VITVI01G01413,VITVI01G01499,VITVI01G01646,VITVI01G01680,VITVI01G00036,VITVI01G00060,VITVI01G00103,VITVI01…
GO:CC	intracellular organelle	GO:0043229	7.99e-21	20.0975	8795	1061	407	35134	VITVI10G01213,VITVI07G00071,VITVI07G00062,VITVI10G00380,VITVI10G00383,VITVI10G04259,VITVI10G00345,VITVI07G02896,VITVI10G00455,VITVI10G00399,VITVI04G04411,VITVI13G00239,VITVI10G02343,VITVI07G04656,VITVI02G01726,VITVI10G00414,VITVI10G04302,VITVI00G04839,VITVI02G04129,VITVI07G04600,VITVI01G01374,VITVI01G01413,VITVI01G01499,VITVI01G01646,VITVI01G01680,VITVI01G00036,VITVI01G00060,VITVI01G00103,VITVI01…
GO:CC	nucleus	GO:0005634	1.6e-16	15.7958	4387	1061	232	35134	VITVI10G00380,VITVI10G04259,VITVI10G00345,VITVI13G00239,VITVI10G04302,VITVI00G04839,VITVI01G01413,VITVI01G01499,VITVI01G01646,VITVI01G01680,VITVI01G00190,VITVI01G00219,VITVI01G04062,VITVI01G00412,VITVI01G00427,VITVI01G00511,VITVI01G00523,VITVI01G00545,VITVI01G00836,VITVI01G02098,VITVI01G00970,VITVI01G01040,VITVI01G01729,VITVI02G00709,VITVI02G00759,VITVI02G00089,VITVI02G00329,VITVI02G00411,VITVI03…
GO:CC	cytoplasm	GO:0005737	8.07e-16	15.0932	6370	1061	303	35134	VITVI10G01213,VITVI07G00062,VITVI10G00383,VITVI07G02896,VITVI10G00455,VITVI10G00399,VITVI04G04411,VITVI07G01363,VITVI10G02343,VITVI02G01726,VITVI10G00385,VITVI10G00414,VITVI10G04302,VITVI00G04839,VITVI02G04129,VITVI07G04600,VITVI01G01362,VITVI01G01374,VITVI01G01418,VITVI01G01499,VITVI01G00036,VITVI01G00060,VITVI01G00103,VITVI01G00163,VITVI01G00171,VITVI01G00176,VITVI01G00178,VITVI01G00182,VITVI01…
GO:CC	membrane	GO:0016020	5.26e-13	12.279	9855	1061	411	35134	VITVI10G01213,VITVI07G00073,VITVI07G00071,VITVI00G04581,VITVI10G00383,VITVI10G00185,VITVI10G00336,VITVI07G02881,VITVI13G01243,VITVI10G00455,VITVI04G04411,VITVI14G02411,VITVI10G02135,VITVI10G02343,VITVI07G01345,VITVI10G00385,VITVI04G02278,VITVI10G00414,VITVI15G04535,VITVI02G04129,VITVI07G04600,VITVI01G01173,VITVI01G01302,VITVI01G01304,VITVI01G01411,VITVI01G01439,VITVI01G01499,VITVI01G04446,VITVI01…
GO:CC	endomembrane system	GO:0012505	1.35572e-05	4.86783	1455	1061	79	35134	VITVI10G00455,VITVI04G04411,VITVI10G02343,VITVI10G00385,VITVI10G00414,VITVI02G04129,VITVI01G01499,VITVI01G00103,VITVI01G00190,VITVI01G00376,VITVI01G00959,VITVI02G00699,VITVI02G00237,VITVI02G00289,VITVI02G00411,VITVI03G01316,VITVI03G00103,VITVI03G00535,VITVI03G00492,VITVI04G00115,VITVI04G00526,VITVI04G04396,VITVI04G01565,VITVI05G00210,VITVI05G00287,VITVI05G00470,VITVI05G00611,VITVI05G00632,VITVI05…
GO:CC	nuclear lumen	GO:0031981	7.00638e-05	4.15451	549	1061	38	35134	VITVI01G01646,VITVI01G00219,VITVI01G00836,VITVI01G02098,VITVI02G00329,VITVI03G00308,VITVI04G00513,VITVI04G00749,VITVI05G00872,VITVI05G00101,VITVI05G00063,VITVI05G02135,VITVI07G00312,VITVI07G00335,VITVI07G00336,VITVI07G01851,VITVI08G00120,VITVI08G00125,VITVI11G00024,VITVI11G01319,VITVI11G01102,VITVI12G00313,VITVI12G00328,VITVI12G02175,VITVI12G00022,VITVI13G01420,VITVI13G01070,VITVI14G00746,VITVI14…
GO:CC	organelle lumen	GO:0043233	0.000194876	3.71024	692	1061	43	35134	VITVI01G01374,VITVI01G01646,VITVI01G00219,VITVI01G00836,VITVI01G02098,VITVI02G00617,VITVI02G00329,VITVI03G00308,VITVI04G00513,VITVI04G00749,VITVI05G00872,VITVI05G00101,VITVI05G00063,VITVI05G02135,VITVI07G00312,VITVI07G00335,VITVI07G00336,VITVI07G01851,VITVI08G01483,VITVI08G00120,VITVI08G00125,VITVI09G00826,VITVI11G00024,VITVI11G01319,VITVI11G01102,VITVI12G00313,VITVI12G00328,VITVI12G01904,VITVI12…
GO:CC	membrane-enclosed lumen	GO:0031974	0.000194876	3.71024	692	1061	43	35134	VITVI01G01374,VITVI01G01646,VITVI01G00219,VITVI01G00836,VITVI01G02098,VITVI02G00617,VITVI02G00329,VITVI03G00308,VITVI04G00513,VITVI04G00749,VITVI05G00872,VITVI05G00101,VITVI05G00063,VITVI05G02135,VITVI07G00312,VITVI07G00335,VITVI07G00336,VITVI07G01851,VITVI08G01483,VITVI08G00120,VITVI08G00125,VITVI09G00826,VITVI11G00024,VITVI11G01319,VITVI11G01102,VITVI12G00313,VITVI12G00328,VITVI12G01904,VITVI12…
GO:CC	intracellular organelle lumen	GO:0070013	0.000194876	3.71024	692	1061	43	35134	VITVI01G01374,VITVI01G01646,VITVI01G00219,VITVI01G00836,VITVI01G02098,VITVI02G00617,VITVI02G00329,VITVI03G00308,VITVI04G00513,VITVI04G00749,VITVI05G00872,VITVI05G00101,VITVI05G00063,VITVI05G02135,VITVI07G00312,VITVI07G00335,VITVI07G00336,VITVI07G01851,VITVI08G01483,VITVI08G00120,VITVI08G00125,VITVI09G00826,VITVI11G00024,VITVI11G01319,VITVI11G01102,VITVI12G00313,VITVI12G00328,VITVI12G01904,VITVI12…
GO:CC	nuclear pore	GO:0005643	0.000461626	3.33571	64	1061	10	35134	VITVI02G00411,VITVI03G01316,VITVI03G00103,VITVI08G01946,VITVI09G00061,VITVI09G00816,VITVI13G01256,VITVI14G01871,VITVI14G01330,VITVI19G01763
GO:CC	nuclear envelope	GO:0005635	0.000716677	3.14468	97	1061	12	35134	VITVI01G00190,VITVI02G00411,VITVI03G01316,VITVI03G00103,VITVI08G01946,VITVI09G00061,VITVI09G00816,VITVI10G01507,VITVI13G01256,VITVI14G01871,VITVI14G01330,VITVI19G01763
GO:CC	protein-containing complex	GO:0032991	0.000716677	3.14468	2986	1061	128	35134	VITVI10G02343,VITVI10G00385,VITVI10G04302,VITVI00G04839,VITVI01G00036,VITVI01G00060,VITVI01G00163,VITVI01G00171,VITVI01G00523,VITVI01G02098,VITVI02G00329,VITVI02G00411,VITVI03G01316,VITVI03G01011,VITVI03G00103,VITVI03G00308,VITVI04G00219,VITVI04G00513,VITVI04G00523,VITVI04G00526,VITVI04G01225,VITVI04G01452,VITVI04G04396,VITVI04G00749,VITVI05G00210,VITVI05G00632,VITVI05G01344,VITVI05G00101,VITVI05…
GO:CC	cytosol	GO:0005829	0.00146261	2.83487	1109	1061	57	35134	VITVI10G01213,VITVI01G01362,VITVI01G00036,VITVI01G00060,VITVI01G00163,VITVI01G00190,VITVI01G00376,VITVI01G00568,VITVI02G00724,VITVI02G00188,VITVI02G00263,VITVI02G00315,VITVI03G01481,VITVI03G00541,VITVI05G00242,VITVI05G01314,VITVI05G01344,VITVI05G01493,VITVI06G00746,VITVI06G00791,VITVI06G00979,VITVI06G04416,VITVI07G00286,VITVI07G00343,VITVI08G01211,VITVI08G01809,VITVI08G00125,VITVI08G00676,VITVI09…
GO:CC	plasma membrane	GO:0005886	0.00353981	2.45102	1412	1061	67	35134	VITVI10G02343,VITVI10G00385,VITVI01G01499,VITVI01G00038,VITVI01G00199,VITVI02G00048,VITVI03G01198,VITVI03G04464,VITVI03G00133,VITVI03G00284,VITVI03G00358,VITVI03G04211,VITVI04G00725,VITVI05G00287,VITVI05G00359,VITVI05G00623,VITVI06G00113,VITVI06G00393,VITVI06G04319,VITVI06G01331,VITVI06G01396,VITVI06G01526,VITVI07G00343,VITVI07G02290,VITVI07G01989,VITVI07G02013,VITVI08G01255,VITVI08G01483,VITVI08…
GO:CC	nuclear protein-containing complex	GO:0140513	0.00422267	2.37441	755	1061	41	35134	VITVI01G00523,VITVI01G02098,VITVI02G00329,VITVI02G00411,VITVI03G01316,VITVI03G00103,VITVI04G00513,VITVI05G02135,VITVI06G00048,VITVI07G00307,VITVI07G01946,VITVI07G00169,VITVI08G01645,VITVI08G01946,VITVI08G00097,VITVI08G00120,VITVI09G00061,VITVI09G00139,VITVI09G00816,VITVI10G00497,VITVI10G00717,VITVI11G01148,VITVI11G01319,VITVI12G00313,VITVI12G00328,VITVI12G00022,VITVI13G00069,VITVI13G01256,VITVI13…
GO:CC	nucleoplasm	GO:0005654	0.00422267	2.37441	252	1061	19	35134	VITVI01G00836,VITVI01G02098,VITVI02G00329,VITVI04G00513,VITVI05G00101,VITVI05G02135,VITVI08G00125,VITVI11G00024,VITVI11G01319,VITVI12G00313,VITVI12G00328,VITVI12G00022,VITVI13G01420,VITVI14G01787,VITVI16G01348,VITVI17G00376,VITVI17G00882,VITVI18G00167,VITVI19G00023
GO:CC	bounding membrane of organelle	GO:0098588	0.00428221	2.36833	783	1061	42	35134	VITVI10G01213,VITVI10G02343,VITVI01G01499,VITVI01G00176,VITVI02G00699,VITVI02G00384,VITVI03G00535,VITVI04G00526,VITVI04G04396,VITVI05G00210,VITVI05G00632,VITVI06G00805,VITVI06G01331,VITVI06G01462,VITVI06G01521,VITVI06G01526,VITVI08G02314,VITVI08G02315,VITVI08G01873,VITVI08G00152,VITVI10G01507,VITVI10G01135,VITVI10G00092,VITVI11G00026,VITVI11G00387,VITVI11G00700,VITVI11G01106,VITVI12G00484,VITVI13…
GO:CC	cell periphery	GO:0071944	0.0106869	1.97115	1673	1061	74	35134	VITVI10G02343,VITVI10G00385,VITVI01G01499,VITVI01G00038,VITVI01G00199,VITVI02G00048,VITVI03G01198,VITVI03G04464,VITVI03G00133,VITVI03G00284,VITVI03G00358,VITVI03G04211,VITVI04G00725,VITVI05G00287,VITVI05G00359,VITVI05G00623,VITVI05G02111,VITVI06G00113,VITVI06G00393,VITVI06G00397,VITVI06G04319,VITVI06G01331,VITVI06G01396,VITVI06G01526,VITVI07G00343,VITVI07G00496,VITVI07G02290,VITVI07G01989,VITVI07…
GO:CC	vacuolar membrane	GO:0005774	0.013619	1.86585	196	1061	15	35134	VITVI02G00384,VITVI06G00805,VITVI06G01331,VITVI06G01462,VITVI06G01526,VITVI08G00152,VITVI11G00026,VITVI13G04284,VITVI14G01946,VITVI14G01951,VITVI15G00842,VITVI16G01210,VITVI17G00031,VITVI18G01058,VITVI19G00145
GO:CC	organelle membrane	GO:0031090	0.0168029	1.77462	1376	1061	62	35134	VITVI10G01213,VITVI10G02343,VITVI10G00414,VITVI07G04600,VITVI01G01499,VITVI01G00176,VITVI01G00178,VITVI02G00699,VITVI02G00384,VITVI03G00535,VITVI03G00492,VITVI04G00526,VITVI04G01225,VITVI04G04396,VITVI05G00210,VITVI05G00632,VITVI05G01655,VITVI06G00805,VITVI06G01331,VITVI06G01462,VITVI06G01521,VITVI06G01526,VITVI07G00603,VITVI08G01270,VITVI08G02314,VITVI08G02315,VITVI08G01873,VITVI08G00152,VITVI09…
GO:CC	vesicle	GO:0031982	0.0169265	1.77143	401	1061	24	35134	VITVI10G02343,VITVI01G01499,VITVI01G00376,VITVI02G00289,VITVI04G04396,VITVI05G00210,VITVI05G00632,VITVI05G00085,VITVI06G04416,VITVI06G01364,VITVI07G00343,VITVI08G00133,VITVI09G00162,VITVI10G01135,VITVI11G00387,VITVI11G00700,VITVI11G01202,VITVI12G00484,VITVI13G00659,VITVI14G01871,VITVI14G00508,VITVI17G00344,VITVI18G01671,VITVI19G00153
GO:CC	chromosome	GO:0005694	0.0198901	1.70136	407	1061	24	35134	VITVI01G01646,VITVI01G02098,VITVI04G00523,VITVI04G01452,VITVI04G00749,VITVI05G02135,VITVI06G04090,VITVI06G01262,VITVI07G00606,VITVI07G00607,VITVI07G02270,VITVI07G00219,VITVI08G02185,VITVI10G00497,VITVI11G00163,VITVI13G01651,VITVI13G01759,VITVI14G00743,VITVI14G01787,VITVI14G01462,VITVI16G00299,VITVI18G00220,VITVI18G02964,VITVI19G01624
GO:CC	nucleolus	GO:0005730	0.0310047	1.50857	238	1061	16	35134	VITVI03G00308,VITVI05G00872,VITVI05G00063,VITVI07G00312,VITVI07G00335,VITVI07G00336,VITVI07G01851,VITVI08G00120,VITVI11G01102,VITVI12G02175,VITVI13G01070,VITVI14G00746,VITVI15G00581,VITVI15G00650,VITVI19G00245,VITVI19G01624
GO:CC	transferase complex	GO:1990234	0.0354424	1.45048	576	1061	30	35134	VITVI10G04302,VITVI00G04839,VITVI02G00329,VITVI04G00513,VITVI04G01452,VITVI05G02135,VITVI06G00113,VITVI06G00376,VITVI07G01826,VITVI08G01201,VITVI09G00430,VITVI09G00619,VITVI09G00734,VITVI09G00793,VITVI11G00748,VITVI11G01319,VITVI12G04069,VITVI12G00313,VITVI12G00328,VITVI13G01651,VITVI13G00069,VITVI13G01420,VITVI15G00079,VITVI16G00299,VITVI17G00376,VITVI18G00167,VITVI18G02527,VITVI18G00251,VITVI18…
GO:CC	mitochondrial outer membrane	GO:0005741	0.0434594	1.36192	35	1061	5	35134	VITVI01G00176,VITVI06G01521,VITVI08G02314,VITVI08G02315,VITVI11G01106
KEGG	KEGG root term	KEGG:00000	6.29e-13	12.2016	2608	1061	151	35134	VITVI10G01213,VITVI07G00062,VITVI10G00383,VITVI10G00399,VITVI10G00414,VITVI07G03083,VITVI01G00060,VITVI01G00108,VITVI01G00162,VITVI01G00178,VITVI01G00246,VITVI01G00286,VITVI01G00376,VITVI01G00474,VITVI01G00568,VITVI02G00634,VITVI02G00699,VITVI02G00724,VITVI02G00043,VITVI02G00048,VITVI02G00188,VITVI02G00263,VITVI02G00315,VITVI02G00324,VITVI02G00326,VITVI02G00327,VITVI02G00411,VITVI02G01228,VITVI03…
KEGG	Metabolic pathways	KEGG:01100	1.71e-08	7.767	1235	1061	79	35134	VITVI07G00062,VITVI10G00383,VITVI10G00399,VITVI10G00414,VITVI07G03083,VITVI01G00178,VITVI01G00246,VITVI01G00286,VITVI01G00568,VITVI02G00634,VITVI02G00724,VITVI02G00188,VITVI02G00263,VITVI02G00315,VITVI02G00324,VITVI02G00326,VITVI03G00358,VITVI04G00009,VITVI04G01914,VITVI05G00242,VITVI05G00421,VITVI05G01314,VITVI05G01583,VITVI05G01623,VITVI06G00021,VITVI06G00236,VITVI06G01727,VITVI07G00286,VITVI07…
KEGG	Phosphatidylinositol signaling system	KEGG:04070	0.000267958	3.57193	26	1061	7	35134	VITVI02G00724,VITVI03G00358,VITVI11G01318,VITVI12G01866,VITVI13G00731,VITVI17G00683,VITVI19G00305
KEGG	alpha-Linolenic acid metabolism	KEGG:00592	0.00211216	2.67527	26	1061	6	35134	VITVI01G00246,VITVI14G01246,VITVI18G00124,VITVI18G00886,VITVI18G02763,VITVI18G03162
KEGG	Nucleocytoplasmic transport	KEGG:03013	0.00211216	2.67527	50	1061	8	35134	VITVI02G00411,VITVI04G01893,VITVI06G00053,VITVI06G01268,VITVI08G01946,VITVI14G01871,VITVI14G01418,VITVI19G01763
KEGG	Biosynthesis of secondary metabolites	KEGG:01110	0.00374313	2.42676	681	1061	38	35134	VITVI07G00062,VITVI07G03083,VITVI01G00178,VITVI01G00246,VITVI01G00286,VITVI01G00568,VITVI02G00634,VITVI02G00263,VITVI02G00324,VITVI04G01914,VITVI05G00242,VITVI05G00421,VITVI06G00021,VITVI07G01657,VITVI08G01319,VITVI08G00676,VITVI09G01297,VITVI10G00764,VITVI11G00130,VITVI11G00237,VITVI11G00318,VITVI11G01318,VITVI12G01596,VITVI13G01613,VITVI14G01246,VITVI14G01600,VITVI14G01605,VITVI15G00079,VITVI15…
KEGG	Endocytosis	KEGG:04144	0.00547185	2.26187	91	1061	10	35134	VITVI01G00376,VITVI02G00699,VITVI03G00133,VITVI05G00085,VITVI08G01171,VITVI12G01866,VITVI13G00858,VITVI18G02359,VITVI19G00153,VITVI19G00290
KEGG	Purine metabolism	KEGG:00230	0.00877674	2.05667	37	1061	6	35134	VITVI02G00315,VITVI08G01809,VITVI08G00676,VITVI09G00093,VITVI17G00937,VITVI18G00674
KEGG	Nucleotide metabolism	KEGG:01232	0.0119288	1.9234	40	1061	6	35134	VITVI02G00315,VITVI05G01314,VITVI08G00676,VITVI11G01376,VITVI18G00674,VITVI19G01776
KEGG	Inositol phosphate metabolism	KEGG:00562	0.0170243	1.76893	30	1061	5	35134	VITVI02G00724,VITVI03G00358,VITVI11G00026,VITVI12G01866,VITVI13G00731
KEGG	Cysteine and methionine metabolism	KEGG:00270	0.0212989	1.67164	62	1061	7	35134	VITVI01G00286,VITVI02G00326,VITVI05G00242,VITVI07G02048,VITVI09G01297,VITVI11G00318,VITVI19G00654
KEGG	Viral life cycle - HIV-1	KEGG:03250	0.0293811	1.53193	22	1061	4	35134	VITVI01G00376,VITVI04G01893,VITVI13G00858,VITVI14G01418
KEGG	Glycerolipid metabolism	KEGG:00561	0.0351207	1.45444	38	1061	5	35134	VITVI09G00691,VITVI11G00153,VITVI11G01318,VITVI17G00683,VITVI19G00305
KEGG	Alanine, aspartate and glutamate metabolism	KEGG:00250	0.0351207	1.45444	24	1061	4	35134	VITVI01G00568,VITVI09G00214,VITVI11G00318,VITVI13G01645
KEGG	Biosynthesis of amino acids	KEGG:01230	0.0391621	1.40713	131	1061	10	35134	VITVI07G00062,VITVI04G01914,VITVI05G00242,VITVI06G00021,VITVI09G01297,VITVI11G00130,VITVI11G00237,VITVI11G00318,VITVI14G01600,VITVI19G00654
KEGG	Arachidonic acid metabolism	KEGG:00590	0.0482303	1.31668	5	1061	2	35134	VITVI05G01623,VITVI11G00234

## Sheet: K2_GOterm
Source	Term Name	Term ID	Adjusted P Value	Negative log10 of Adjusted P Value	Term Size	Query Size	Intersection Size	Effective Domain Size	Intersections
GO:MF	RNA binding	GO:0003723	6.79968e-47	46.1675	1956	925	179	35134	VITVI07G01114,VITVI07G01405,VITVI04G01545,VITVI02G01712,VITVI07G02548,VITVI00G04706,VITVI10G02255,VITVI10G04134,VITVI07G04579,VITVI01G00156,VITVI01G00173,VITVI01G00355,VITVI01G00572,VITVI01G00823,VITVI01G00971,VITVI01G00681,VITVI01G02047,VITVI01G02053,VITVI01G01815,VITVI02G01314,VITVI02G01315,VITVI03G01189,VITVI03G00007,VITVI03G00031,VITVI03G00331,VITVI04G00134,VITVI04G00184,VITVI04G00235,VITVI04…
GO:MF	molecular_function	GO:0003674	3.56888e-39	38.4475	21589	925	756	35134	VITVI10G01219,VITVI07G01205,VITVI07G00078,VITVI10G00217,VITVI07G02582,VITVI13G04636,VITVI07G04489,VITVI07G01114,VITVI07G01405,VITVI07G01247,VITVI01G00652,VITVI02G00565,VITVI00G04569,VITVI08G02419,VITVI08G01959,VITVI04G01526,VITVI15G04172,VITVI17G01311,VITVI13G00241,VITVI13G00233,VITVI07G01393,VITVI10G04226,VITVI10G00387,VITVI04G01545,VITVI00G04504,VITVI00G04505,VITVI02G01712,VITVI15G04488,VITVI07…
GO:MF	mRNA binding	GO:0003729	5.99721e-25	24.2221	511	925	67	35134	VITVI07G01114,VITVI02G01712,VITVI07G02548,VITVI10G02255,VITVI01G00156,VITVI01G00823,VITVI01G00681,VITVI03G01189,VITVI04G00134,VITVI04G00261,VITVI04G00332,VITVI04G02132,VITVI04G00980,VITVI05G01112,VITVI05G00835,VITVI05G00060,VITVI05G00033,VITVI06G00651,VITVI06G01501,VITVI06G04445,VITVI06G01524,VITVI07G00429,VITVI07G00923,VITVI07G01705,VITVI07G00226,VITVI07G00121,VITVI08G01511,VITVI08G01612,VITVI08…
GO:MF	binding	GO:0005488	9.73394e-25	24.0117	15172	925	560	35134	VITVI07G00078,VITVI10G00217,VITVI13G04636,VITVI07G01114,VITVI07G01405,VITVI01G00652,VITVI08G01959,VITVI04G01526,VITVI15G04172,VITVI17G01311,VITVI13G00233,VITVI07G01393,VITVI10G04226,VITVI10G00387,VITVI04G01545,VITVI00G04504,VITVI00G04505,VITVI02G01712,VITVI15G04488,VITVI10G00275,VITVI07G02548,VITVI00G04706,VITVI10G02201,VITVI10G02255,VITVI00G04732,VITVI10G04134,VITVI08G04000,VITVI07G04579,VITVI01…
GO:MF	unfolded protein binding	GO:0051082	6.72341e-18	17.1724	150	925	32	35134	VITVI10G00217,VITVI17G01311,VITVI07G01393,VITVI15G04488,VITVI01G01311,VITVI01G00594,VITVI02G00187,VITVI05G01545,VITVI07G00394,VITVI07G02050,VITVI08G01818,VITVI08G00924,VITVI09G00045,VITVI09G00635,VITVI10G00496,VITVI13G02014,VITVI13G02016,VITVI13G00405,VITVI13G00409,VITVI13G00410,VITVI13G00491,VITVI13G01770,VITVI14G01224,VITVI15G00492,VITVI15G00614,VITVI16G01413,VITVI17G00171,VITVI17G00287,VITVI17…
GO:MF	structural molecule activity	GO:0005198	2.27244e-17	16.6435	559	925	59	35134	VITVI02G01712,VITVI07G02548,VITVI10G02201,VITVI01G01620,VITVI01G00971,VITVI02G01315,VITVI02G00111,VITVI03G01190,VITVI03G00344,VITVI03G00721,VITVI04G00064,VITVI04G00554,VITVI04G02132,VITVI04G00980,VITVI05G00254,VITVI05G01254,VITVI05G00033,VITVI06G00041,VITVI06G00051,VITVI06G00651,VITVI06G00669,VITVI06G00701,VITVI06G01847,VITVI06G01491,VITVI06G04445,VITVI07G00923,VITVI07G00220,VITVI07G00121,VITVI07…
GO:MF	nucleic acid binding	GO:0003676	2.11216e-16	15.6753	5249	925	239	35134	VITVI07G00078,VITVI07G01114,VITVI07G01405,VITVI04G01545,VITVI02G01712,VITVI07G02548,VITVI00G04706,VITVI10G02201,VITVI10G02255,VITVI10G04134,VITVI07G04579,VITVI01G01564,VITVI01G00156,VITVI01G00173,VITVI01G00245,VITVI01G00355,VITVI01G00572,VITVI01G00823,VITVI01G00971,VITVI01G00681,VITVI01G02047,VITVI01G02053,VITVI01G00594,VITVI01G01815,VITVI02G00660,VITVI02G01314,VITVI02G01315,VITVI02G00554,VITVI03…
GO:MF	structural constituent of ribosome	GO:0003735	4.76228e-16	15.3222	390	925	47	35134	VITVI02G01712,VITVI07G02548,VITVI01G00971,VITVI02G01315,VITVI03G01190,VITVI04G00064,VITVI04G00554,VITVI04G02132,VITVI04G00980,VITVI05G00254,VITVI05G01254,VITVI05G00033,VITVI06G00041,VITVI06G00651,VITVI06G00701,VITVI06G01491,VITVI06G04445,VITVI07G00923,VITVI07G00121,VITVI07G01501,VITVI07G01329,VITVI08G01709,VITVI08G01796,VITVI08G01037,VITVI09G00043,VITVI09G01927,VITVI09G04364,VITVI09G00980,VITVI10…
GO:MF	heterocyclic compound binding	GO:1901363	6.09502e-15	14.215	10081	925	382	35134	VITVI07G00078,VITVI10G00217,VITVI07G01114,VITVI07G01405,VITVI07G01393,VITVI04G01545,VITVI00G04504,VITVI00G04505,VITVI02G01712,VITVI15G04488,VITVI10G00275,VITVI07G02548,VITVI00G04706,VITVI10G02201,VITVI10G02255,VITVI10G04134,VITVI08G04000,VITVI07G04579,VITVI01G01311,VITVI01G01376,VITVI01G01564,VITVI01G00156,VITVI01G00173,VITVI01G00245,VITVI01G00355,VITVI01G00572,VITVI01G00800,VITVI01G00823,VITVI01…
GO:MF	organic cyclic compound binding	GO:0097159	6.83015e-15	14.1656	10094	925	382	35134	VITVI07G00078,VITVI10G00217,VITVI07G01114,VITVI07G01405,VITVI07G01393,VITVI04G01545,VITVI00G04504,VITVI00G04505,VITVI02G01712,VITVI15G04488,VITVI10G00275,VITVI07G02548,VITVI00G04706,VITVI10G02201,VITVI10G02255,VITVI10G04134,VITVI08G04000,VITVI07G04579,VITVI01G01311,VITVI01G01376,VITVI01G01564,VITVI01G00156,VITVI01G00173,VITVI01G00245,VITVI01G00355,VITVI01G00572,VITVI01G00800,VITVI01G00823,VITVI01…
GO:MF	ribonucleoside triphosphate phosphatase activity	GO:0017111	3.95418e-10	9.40294	778	925	57	35134	VITVI10G00217,VITVI15G04488,VITVI01G01311,VITVI01G00333,VITVI01G00594,VITVI02G00187,VITVI02G00189,VITVI03G00721,VITVI04G00098,VITVI04G01298,VITVI04G01014,VITVI05G00780,VITVI05G01784,VITVI05G01486,VITVI06G00032,VITVI06G00051,VITVI06G01847,VITVI06G01295,VITVI06G01553,VITVI07G00464,VITVI07G02301,VITVI07G01838,VITVI07G00186,VITVI07G02050,VITVI08G01729,VITVI08G01818,VITVI08G00956,VITVI09G00319,VITVI10…
GO:MF	protein folding chaperone	GO:0044183	8.55351e-10	9.06786	124	925	21	35134	VITVI10G00217,VITVI15G04488,VITVI01G01311,VITVI01G00594,VITVI02G00187,VITVI04G01014,VITVI06G00032,VITVI06G01295,VITVI07G02050,VITVI08G01818,VITVI09G00186,VITVI09G00876,VITVI10G00049,VITVI14G01224,VITVI15G00492,VITVI15G00614,VITVI16G01413,VITVI17G00287,VITVI17G01403,VITVI19G02080,VITVI19G00569
GO:MF	catalytic activity	GO:0003824	1.18799e-09	8.92519	11701	925	404	35134	VITVI07G01205,VITVI10G00217,VITVI07G02582,VITVI13G04636,VITVI07G04489,VITVI07G01405,VITVI07G01247,VITVI02G00565,VITVI00G04569,VITVI15G04172,VITVI13G00241,VITVI10G04226,VITVI00G04504,VITVI00G04505,VITVI15G04488,VITVI07G04669,VITVI13G04616,VITVI08G04000,VITVI00G04799,VITVI01G01311,VITVI01G01372,VITVI01G01376,VITVI01G01563,VITVI01G01564,VITVI01G00132,VITVI01G00166,VITVI01G01902,VITVI01G00245,VITVI01…
GO:MF	protein binding	GO:0005515	1.29998e-09	8.88606	4981	925	205	35134	VITVI10G00217,VITVI13G04636,VITVI01G00652,VITVI08G01959,VITVI04G01526,VITVI17G01311,VITVI07G01393,VITVI10G04226,VITVI10G00387,VITVI15G04488,VITVI00G04706,VITVI10G02201,VITVI00G04732,VITVI01G01311,VITVI01G01457,VITVI01G00156,VITVI01G00166,VITVI01G00572,VITVI01G00819,VITVI01G04240,VITVI01G01023,VITVI01G00594,VITVI01G01708,VITVI01G01762,VITVI01G01815,VITVI02G00645,VITVI02G01314,VITVI02G00111,VITVI02…
GO:MF	hydrolase activity, acting on acid anhydrides	GO:0016817	3.91451e-09	8.40732	878	925	59	35134	VITVI10G00217,VITVI15G04488,VITVI01G01311,VITVI01G00132,VITVI01G00333,VITVI01G00594,VITVI02G00187,VITVI02G00189,VITVI03G00721,VITVI04G00098,VITVI04G01298,VITVI04G01014,VITVI05G00780,VITVI05G01784,VITVI05G01486,VITVI06G00032,VITVI06G00051,VITVI06G01847,VITVI06G01295,VITVI06G01553,VITVI07G00464,VITVI07G02301,VITVI07G01838,VITVI07G00186,VITVI07G02050,VITVI08G01729,VITVI08G01818,VITVI08G00956,VITVI08…
GO:MF	pyrophosphatase activity	GO:0016462	5.31315e-09	8.27465	863	925	58	35134	VITVI10G00217,VITVI15G04488,VITVI01G01311,VITVI01G00333,VITVI01G00594,VITVI02G00187,VITVI02G00189,VITVI03G00721,VITVI04G00098,VITVI04G01298,VITVI04G01014,VITVI05G00780,VITVI05G01784,VITVI05G01486,VITVI06G00032,VITVI06G00051,VITVI06G01847,VITVI06G01295,VITVI06G01553,VITVI07G00464,VITVI07G02301,VITVI07G01838,VITVI07G00186,VITVI07G02050,VITVI08G01729,VITVI08G01818,VITVI08G00956,VITVI08G00993,VITVI09…
GO:MF	hydrolase activity, acting on acid anhydrides, in phosphorus-containing anhydrides	GO:0016818	7.44434e-09	8.12817	872	925	58	35134	VITVI10G00217,VITVI15G04488,VITVI01G01311,VITVI01G00333,VITVI01G00594,VITVI02G00187,VITVI02G00189,VITVI03G00721,VITVI04G00098,VITVI04G01298,VITVI04G01014,VITVI05G00780,VITVI05G01784,VITVI05G01486,VITVI06G00032,VITVI06G00051,VITVI06G01847,VITVI06G01295,VITVI06G01553,VITVI07G00464,VITVI07G02301,VITVI07G01838,VITVI07G00186,VITVI07G02050,VITVI08G01729,VITVI08G01818,VITVI08G00956,VITVI08G00993,VITVI09…
GO:MF	catalytic activity, acting on RNA	GO:0140098	1.37659e-08	7.8612	636	925	47	35134	VITVI07G01405,VITVI08G04000,VITVI01G01564,VITVI01G00800,VITVI01G00823,VITVI01G01774,VITVI02G00341,VITVI03G00331,VITVI03G00728,VITVI03G00543,VITVI04G00235,VITVI04G00265,VITVI06G01501,VITVI07G01892,VITVI08G01871,VITVI08G00039,VITVI09G00176,VITVI09G00224,VITVI09G00969,VITVI11G00095,VITVI11G00316,VITVI12G00115,VITVI12G00283,VITVI12G01620,VITVI12G00367,VITVI12G00465,VITVI13G00286,VITVI13G00111,VITVI13…
GO:MF	hydrolase activity	GO:0016787	2.77205e-08	7.5572	3763	925	160	35134	VITVI07G01205,VITVI10G00217,VITVI07G02582,VITVI13G04636,VITVI07G04489,VITVI00G04504,VITVI00G04505,VITVI15G04488,VITVI01G01311,VITVI01G01563,VITVI01G01564,VITVI01G00132,VITVI01G00166,VITVI01G00245,VITVI01G00333,VITVI01G00823,VITVI01G00594,VITVI02G00729,VITVI02G00187,VITVI02G00189,VITVI02G00341,VITVI02G00950,VITVI03G00995,VITVI03G00254,VITVI03G00286,VITVI03G04182,VITVI03G00485,VITVI03G00721,VITVI03…
GO:MF	ATP-dependent protein folding chaperone	GO:0140662	9.38719e-08	7.02746	105	925	17	35134	VITVI10G00217,VITVI15G04488,VITVI01G01311,VITVI01G00594,VITVI02G00187,VITVI04G01014,VITVI06G00032,VITVI06G01295,VITVI07G02050,VITVI08G01818,VITVI09G00186,VITVI09G00876,VITVI14G01224,VITVI15G00614,VITVI16G01413,VITVI17G00287,VITVI19G02080
GO:MF	catalytic activity, acting on a tRNA	GO:0140101	2.64933e-07	6.57686	206	925	23	35134	VITVI08G04000,VITVI01G00800,VITVI01G01774,VITVI03G00331,VITVI03G00728,VITVI04G00235,VITVI04G00265,VITVI09G00224,VITVI11G00316,VITVI12G00115,VITVI12G00283,VITVI12G01620,VITVI12G00465,VITVI14G01160,VITVI15G00533,VITVI15G00050,VITVI16G00938,VITVI17G00022,VITVI18G02323,VITVI18G02183,VITVI18G00960,VITVI18G01807,VITVI19G00137
GO:MF	snoRNA binding	GO:0030515	2.91241e-07	6.53575	18	925	8	35134	VITVI08G01588,VITVI08G01813,VITVI10G00908,VITVI13G01540,VITVI14G00383,VITVI16G00096,VITVI17G00141,VITVI18G00099
GO:MF	purine ribonucleoside triphosphate binding	GO:0035639	7.17331e-07	6.14428	3364	925	141	35134	VITVI10G00217,VITVI07G01393,VITVI00G04504,VITVI00G04505,VITVI15G04488,VITVI10G00275,VITVI08G04000,VITVI01G01311,VITVI01G01564,VITVI01G00355,VITVI01G00800,VITVI01G00823,VITVI01G00681,VITVI01G00594,VITVI01G01774,VITVI01G01758,VITVI02G00023,VITVI02G00187,VITVI02G00189,VITVI02G00320,VITVI02G01204,VITVI02G00950,VITVI02G00483,VITVI03G00254,VITVI03G00283,VITVI03G00452,VITVI03G00331,VITVI03G00721,VITVI03…
GO:MF	ATP-dependent activity	GO:0140657	1.107e-06	5.95585	1087	925	61	35134	VITVI10G00217,VITVI13G04636,VITVI15G04488,VITVI10G00275,VITVI01G01311,VITVI01G01564,VITVI01G00166,VITVI01G00333,VITVI01G00823,VITVI01G00594,VITVI02G00187,VITVI02G00189,VITVI02G00320,VITVI02G00950,VITVI03G00283,VITVI04G00098,VITVI04G01014,VITVI05G00780,VITVI05G01486,VITVI06G00032,VITVI06G00510,VITVI06G01295,VITVI06G01306,VITVI06G01501,VITVI07G02301,VITVI07G02050,VITVI08G01729,VITVI08G01818,VITVI08…
GO:MF	catalytic activity, acting on a nucleic acid	GO:0140640	4.50767e-06	5.34605	1028	925	57	35134	VITVI07G01405,VITVI08G04000,VITVI01G01564,VITVI01G00800,VITVI01G00823,VITVI01G01774,VITVI02G00341,VITVI02G00444,VITVI03G00331,VITVI03G00728,VITVI03G00543,VITVI04G00235,VITVI04G00261,VITVI04G00265,VITVI06G01501,VITVI07G01892,VITVI08G01729,VITVI08G01871,VITVI08G00039,VITVI09G00176,VITVI09G00224,VITVI09G00969,VITVI11G00095,VITVI11G00316,VITVI12G00115,VITVI12G00283,VITVI12G01620,VITVI12G00367,VITVI12…
GO:MF	ligase activity	GO:0016874	1.06728e-05	4.97172	335	925	27	35134	VITVI08G04000,VITVI01G00800,VITVI01G01774,VITVI03G00283,VITVI03G00331,VITVI03G00728,VITVI04G00265,VITVI04G01193,VITVI08G01586,VITVI08G01874,VITVI08G00752,VITVI11G00079,VITVI12G00115,VITVI12G00283,VITVI14G02043,VITVI15G00533,VITVI15G00050,VITVI16G00938,VITVI17G00022,VITVI17G00138,VITVI17G00148,VITVI17G00506,VITVI17G01162,VITVI18G02323,VITVI18G00486,VITVI19G01974,VITVI19G00551
GO:MF	guanyl nucleotide binding	GO:0019001	1.07627e-05	4.96808	337	925	27	35134	VITVI02G00950,VITVI03G00721,VITVI04G00339,VITVI04G01298,VITVI05G01784,VITVI06G00051,VITVI06G00211,VITVI06G01847,VITVI06G01553,VITVI07G00464,VITVI07G01838,VITVI07G00186,VITVI08G01874,VITVI10G00619,VITVI11G00363,VITVI11G04093,VITVI11G00595,VITVI12G00232,VITVI14G00901,VITVI14G01658,VITVI14G00251,VITVI16G00652,VITVI17G00130,VITVI17G00250,VITVI18G00590,VITVI18G00655,VITVI18G00099
GO:MF	GTP binding	GO:0005525	1.07627e-05	4.96808	337	925	27	35134	VITVI02G00950,VITVI03G00721,VITVI04G00339,VITVI04G01298,VITVI05G01784,VITVI06G00051,VITVI06G00211,VITVI06G01847,VITVI06G01553,VITVI07G00464,VITVI07G01838,VITVI07G00186,VITVI08G01874,VITVI10G00619,VITVI11G00363,VITVI11G04093,VITVI11G00595,VITVI12G00232,VITVI14G00901,VITVI14G01658,VITVI14G00251,VITVI16G00652,VITVI17G00130,VITVI17G00250,VITVI18G00590,VITVI18G00655,VITVI18G00099
GO:MF	guanyl ribonucleotide binding	GO:0032561	1.07627e-05	4.96808	337	925	27	35134	VITVI02G00950,VITVI03G00721,VITVI04G00339,VITVI04G01298,VITVI05G01784,VITVI06G00051,VITVI06G00211,VITVI06G01847,VITVI06G01553,VITVI07G00464,VITVI07G01838,VITVI07G00186,VITVI08G01874,VITVI10G00619,VITVI11G00363,VITVI11G04093,VITVI11G00595,VITVI12G00232,VITVI14G00901,VITVI14G01658,VITVI14G00251,VITVI16G00652,VITVI17G00130,VITVI17G00250,VITVI18G00590,VITVI18G00655,VITVI18G00099
GO:MF	ATP hydrolysis activity	GO:0016887	2.036e-05	4.69122	528	925	35	35134	VITVI10G00217,VITVI15G04488,VITVI01G01311,VITVI01G00333,VITVI01G00594,VITVI02G00187,VITVI02G00189,VITVI04G00098,VITVI04G01014,VITVI05G00780,VITVI05G01486,VITVI06G00032,VITVI06G01295,VITVI07G02301,VITVI07G02050,VITVI08G01729,VITVI08G01818,VITVI08G00956,VITVI09G00319,VITVI12G02698,VITVI13G00111,VITVI14G01224,VITVI14G00096,VITVI15G00614,VITVI15G00148,VITVI15G00307,VITVI15G00925,VITVI16G01413,VITVI17…
GO:MF	GTPase activity	GO:0003924	2.3529e-05	4.6284	249	925	22	35134	VITVI03G00721,VITVI04G01298,VITVI05G01784,VITVI06G00051,VITVI06G01847,VITVI06G01553,VITVI07G00464,VITVI07G01838,VITVI07G00186,VITVI10G00619,VITVI11G00363,VITVI11G04093,VITVI11G00595,VITVI12G00232,VITVI14G00901,VITVI14G01658,VITVI14G00251,VITVI16G00652,VITVI17G00250,VITVI18G00590,VITVI18G00655,VITVI18G00099
GO:MF	heat shock protein binding	GO:0031072	5.71125e-05	4.24327	45	925	9	35134	VITVI07G01393,VITVI02G00645,VITVI02G00187,VITVI07G00394,VITVI09G00635,VITVI13G01770,VITVI17G00171,VITVI17G00287,VITVI17G01034
GO:MF	ribonucleoprotein complex binding	GO:0043021	6.02459e-05	4.22007	71	925	11	35134	VITVI01G00173,VITVI02G00645,VITVI06G00696,VITVI07G01877,VITVI10G00713,VITVI13G00354,VITVI13G00101,VITVI14G01703,VITVI14G01405,VITVI19G00569,VITVI19G01438
GO:MF	macromolecule transmembrane transporter activity	GO:0022884	6.43563e-05	4.19141	35	925	8	35134	VITVI02G00950,VITVI03G00848,VITVI06G00510,VITVI06G00700,VITVI09G00319,VITVI11G00263,VITVI15G00148,VITVI19G01702
GO:MF	protein transporter activity	GO:0140318	6.43563e-05	4.19141	35	925	8	35134	VITVI02G00950,VITVI03G00848,VITVI06G00510,VITVI06G00700,VITVI09G00319,VITVI11G00263,VITVI15G00148,VITVI19G01702
GO:MF	protein transmembrane transporter activity	GO:0008320	6.43563e-05	4.19141	35	925	8	35134	VITVI02G00950,VITVI03G00848,VITVI06G00510,VITVI06G00700,VITVI09G00319,VITVI11G00263,VITVI15G00148,VITVI19G01702
GO:MF	ion binding	GO:0043167	9.86627e-05	4.00585	8296	925	277	35134	VITVI10G00217,VITVI15G04172,VITVI17G01311,VITVI13G00233,VITVI07G01393,VITVI00G04504,VITVI00G04505,VITVI15G04488,VITVI10G00275,VITVI00G04706,VITVI10G04134,VITVI08G04000,VITVI01G01311,VITVI01G01376,VITVI01G01563,VITVI01G01564,VITVI01G01588,VITVI01G00245,VITVI01G00337,VITVI01G00355,VITVI01G00800,VITVI01G00823,VITVI01G00681,VITVI01G00594,VITVI01G01762,VITVI01G01774,VITVI01G01782,VITVI01G01758,VITVI02…
GO:MF	rRNA binding	GO:0019843	0.000119912	3.92114	108	925	13	35134	VITVI01G00971,VITVI04G00980,VITVI06G00651,VITVI06G00701,VITVI06G04445,VITVI07G01999,VITVI07G01329,VITVI08G01796,VITVI08G01037,VITVI10G01883,VITVI12G00164,VITVI13G01540,VITVI13G00106
GO:MF	pentosyltransferase activity	GO:0016763	0.000194144	3.71188	53	925	9	35134	VITVI02G01272,VITVI05G00321,VITVI07G00574,VITVI07G01692,VITVI13G01485,VITVI17G00130,VITVI18G01542,VITVI18G02183,VITVI18G00595
GO:MF	protein-folding chaperone binding	GO:0051087	0.000301575	3.5206	56	925	9	35134	VITVI01G01708,VITVI02G00645,VITVI07G00394,VITVI10G00496,VITVI15G00492,VITVI16G01136,VITVI17G01403,VITVI18G00338,VITVI19G00567
GO:MF	aminoacyl-tRNA ligase activity	GO:0004812	0.000381676	3.4183	104	925	12	35134	VITVI08G04000,VITVI01G00800,VITVI01G01774,VITVI03G00331,VITVI03G00728,VITVI04G00265,VITVI12G00283,VITVI15G00533,VITVI15G00050,VITVI16G00938,VITVI17G00022,VITVI18G02323
GO:MF	ligase activity, forming carbon-oxygen bonds	GO:0016875	0.000381676	3.4183	104	925	12	35134	VITVI08G04000,VITVI01G00800,VITVI01G01774,VITVI03G00331,VITVI03G00728,VITVI04G00265,VITVI12G00283,VITVI15G00533,VITVI15G00050,VITVI16G00938,VITVI17G00022,VITVI18G02323
GO:MF	ATP-dependent peptidase activity	GO:0004176	0.000705499	3.1515	36	925	7	35134	VITVI13G04636,VITVI01G00166,VITVI04G00098,VITVI09G00319,VITVI14G00096,VITVI15G00148,VITVI19G01702
GO:MF	protein-transporting ATPase activity	GO:0015450	0.000805784	3.09378	16	925	5	35134	VITVI02G00950,VITVI06G00510,VITVI09G00319,VITVI15G00148,VITVI19G01702
GO:MF	ATP-dependent activity, acting on RNA	GO:0008186	0.000949605	3.02246	81	925	10	35134	VITVI01G01564,VITVI01G00823,VITVI06G01501,VITVI08G00039,VITVI13G00111,VITVI17G00388,VITVI17G00681,VITVI18G01543,VITVI18G01182,VITVI19G01704
GO:MF	RNA helicase activity	GO:0003724	0.000949605	3.02246	81	925	10	35134	VITVI01G01564,VITVI01G00823,VITVI06G01501,VITVI08G00039,VITVI13G00111,VITVI17G00388,VITVI17G00681,VITVI18G01543,VITVI18G01182,VITVI19G01704
GO:MF	ATP binding	GO:0005524	0.00106649	2.97205	3051	925	115	35134	VITVI10G00217,VITVI07G01393,VITVI00G04504,VITVI00G04505,VITVI15G04488,VITVI10G00275,VITVI08G04000,VITVI01G01311,VITVI01G01564,VITVI01G00355,VITVI01G00800,VITVI01G00823,VITVI01G00681,VITVI01G00594,VITVI01G01774,VITVI01G01758,VITVI02G00023,VITVI02G00187,VITVI02G00189,VITVI02G00320,VITVI02G01204,VITVI02G00483,VITVI03G00254,VITVI03G00283,VITVI03G00452,VITVI03G00331,VITVI03G00728,VITVI04G00098,VITVI04…
GO:MF	protein self-association	GO:0043621	0.0010959	2.96023	67	925	9	35134	VITVI05G01660,VITVI09G00045,VITVI13G02014,VITVI13G02016,VITVI13G00405,VITVI13G00409,VITVI13G00410,VITVI13G00491,VITVI18G00338
GO:MF	nucleotide binding	GO:0000166	0.00147378	2.83157	4636	925	162	35134	VITVI10G00217,VITVI07G01393,VITVI00G04504,VITVI00G04505,VITVI15G04488,VITVI10G00275,VITVI08G04000,VITVI01G01311,VITVI01G01376,VITVI01G01564,VITVI01G00355,VITVI01G00800,VITVI01G00823,VITVI01G00681,VITVI01G00698,VITVI01G00594,VITVI01G01774,VITVI01G01758,VITVI02G00023,VITVI02G00187,VITVI02G00189,VITVI02G00320,VITVI02G01204,VITVI02G00950,VITVI02G00483,VITVI03G00254,VITVI03G00283,VITVI03G00452,VITVI03…
GO:MF	nucleoside phosphate binding	GO:1901265	0.00147378	2.83157	4636	925	162	35134	VITVI10G00217,VITVI07G01393,VITVI00G04504,VITVI00G04505,VITVI15G04488,VITVI10G00275,VITVI08G04000,VITVI01G01311,VITVI01G01376,VITVI01G01564,VITVI01G00355,VITVI01G00800,VITVI01G00823,VITVI01G00681,VITVI01G00698,VITVI01G00594,VITVI01G01774,VITVI01G01758,VITVI02G00023,VITVI02G00187,VITVI02G00189,VITVI02G00320,VITVI02G01204,VITVI02G00950,VITVI02G00483,VITVI03G00254,VITVI03G00283,VITVI03G00452,VITVI03…
GO:MF	small molecule binding	GO:0036094	0.00147378	2.83157	4904	925	170	35134	VITVI10G00217,VITVI07G01393,VITVI00G04504,VITVI00G04505,VITVI15G04488,VITVI10G00275,VITVI08G04000,VITVI01G01311,VITVI01G01376,VITVI01G01564,VITVI01G00355,VITVI01G00800,VITVI01G00823,VITVI01G00681,VITVI01G00698,VITVI01G00594,VITVI01G01774,VITVI01G01758,VITVI02G00023,VITVI02G00187,VITVI02G00189,VITVI02G00320,VITVI02G01204,VITVI02G00950,VITVI02G00483,VITVI03G00254,VITVI03G00283,VITVI03G00452,VITVI03…
GO:MF	purine nucleotide binding	GO:0017076	0.00166244	2.77925	4380	925	154	35134	VITVI10G00217,VITVI07G01393,VITVI00G04504,VITVI00G04505,VITVI15G04488,VITVI10G00275,VITVI08G04000,VITVI01G01311,VITVI01G01564,VITVI01G00355,VITVI01G00800,VITVI01G00823,VITVI01G00681,VITVI01G00594,VITVI01G01774,VITVI01G01758,VITVI02G00023,VITVI02G00187,VITVI02G00189,VITVI02G00320,VITVI02G01204,VITVI02G00950,VITVI02G00483,VITVI03G00254,VITVI03G00283,VITVI03G00452,VITVI03G00331,VITVI03G00721,VITVI03…
GO:MF	ribosome binding	GO:0043022	0.00208736	2.6804	58	925	8	35134	VITVI01G00173,VITVI02G00645,VITVI06G00696,VITVI10G00713,VITVI13G00354,VITVI13G00101,VITVI19G00569,VITVI19G01438
GO:MF	intramolecular oxidoreductase activity	GO:0016860	0.0023159	2.63528	59	925	8	35134	VITVI01G00382,VITVI06G00213,VITVI12G04066,VITVI12G00745,VITVI12G00453,VITVI13G00602,VITVI14G00111,VITVI17G00199
GO:MF	isomerase activity	GO:0016853	0.00249852	2.60232	325	925	21	35134	VITVI01G00382,VITVI04G00261,VITVI04G00265,VITVI06G00213,VITVI06G00346,VITVI06G01211,VITVI07G00128,VITVI08G01085,VITVI09G01387,VITVI11G00949,VITVI12G04066,VITVI12G00745,VITVI12G00453,VITVI13G00602,VITVI13G01702,VITVI14G00111,VITVI14G01673,VITVI15G00574,VITVI17G00199,VITVI19G01640,VITVI19G00569
GO:MF	metal ion binding	GO:0046872	0.00275219	2.56032	3964	925	140	35134	VITVI15G04172,VITVI17G01311,VITVI07G01393,VITVI00G04706,VITVI10G04134,VITVI01G01563,VITVI01G01588,VITVI01G00245,VITVI01G00337,VITVI01G00355,VITVI01G01762,VITVI01G01782,VITVI02G00316,VITVI02G00341,VITVI02G00444,VITVI02G01100,VITVI02G00950,VITVI02G00554,VITVI03G01312,VITVI03G00043,VITVI03G00283,VITVI03G00286,VITVI03G00523,VITVI03G00485,VITVI03G00331,VITVI03G01600,VITVI03G00609,VITVI04G00144,VITVI04…
GO:MF	cation binding	GO:0043169	0.00359339	2.4445	3990	925	140	35134	VITVI15G04172,VITVI17G01311,VITVI07G01393,VITVI00G04706,VITVI10G04134,VITVI01G01563,VITVI01G01588,VITVI01G00245,VITVI01G00337,VITVI01G00355,VITVI01G01762,VITVI01G01782,VITVI02G00316,VITVI02G00341,VITVI02G00444,VITVI02G01100,VITVI02G00950,VITVI02G00554,VITVI03G01312,VITVI03G00043,VITVI03G00283,VITVI03G00286,VITVI03G00523,VITVI03G00485,VITVI03G00331,VITVI03G01600,VITVI03G00609,VITVI04G00144,VITVI04…
GO:MF	anion binding	GO:0043168	0.00382087	2.41784	4775	925	163	35134	VITVI10G00217,VITVI13G00233,VITVI07G01393,VITVI00G04504,VITVI00G04505,VITVI15G04488,VITVI10G00275,VITVI08G04000,VITVI01G01311,VITVI01G01376,VITVI01G01564,VITVI01G00355,VITVI01G00800,VITVI01G00823,VITVI01G00681,VITVI01G00594,VITVI01G01774,VITVI01G01758,VITVI02G00023,VITVI02G00187,VITVI02G00189,VITVI02G00320,VITVI02G01204,VITVI02G00950,VITVI02G00483,VITVI03G00254,VITVI03G00283,VITVI03G00452,VITVI03…
GO:MF	translation initiation factor activity	GO:0003743	0.00382087	2.41784	117	925	11	35134	VITVI10G02255,VITVI01G00572,VITVI04G00640,VITVI05G00818,VITVI06G00696,VITVI06G01501,VITVI13G00101,VITVI14G00132,VITVI14G01385,VITVI18G02360,VITVI19G00498
GO:MF	translation regulator activity, nucleic acid binding	GO:0090079	0.00429823	2.36671	180	925	14	35134	VITVI10G02255,VITVI01G00572,VITVI04G00640,VITVI05G00818,VITVI06G00696,VITVI06G01501,VITVI07G00186,VITVI13G00354,VITVI13G00101,VITVI14G00132,VITVI14G01385,VITVI17G00250,VITVI18G02360,VITVI19G00498
GO:MF	purine ribonucleotide binding	GO:0032555	0.00429823	2.36671	4215	925	146	35134	VITVI10G00217,VITVI07G01393,VITVI00G04504,VITVI00G04505,VITVI15G04488,VITVI10G00275,VITVI08G04000,VITVI01G01311,VITVI01G01564,VITVI01G00355,VITVI01G00800,VITVI01G00823,VITVI01G00681,VITVI01G00594,VITVI01G01774,VITVI01G01758,VITVI02G00023,VITVI02G00187,VITVI02G00189,VITVI02G00320,VITVI02G01204,VITVI02G00950,VITVI02G00483,VITVI03G00254,VITVI03G00283,VITVI03G00452,VITVI03G00331,VITVI03G00721,VITVI03…
GO:MF	chloroplast protein-transporting ATPase activity	GO:0016464	0.0045669	2.34038	6	925	3	35134	VITVI09G00319,VITVI15G00148,VITVI19G01702
GO:MF	ribonucleotide binding	GO:0032553	0.0046244	2.33494	4259	925	147	35134	VITVI10G00217,VITVI07G01393,VITVI00G04504,VITVI00G04505,VITVI15G04488,VITVI10G00275,VITVI08G04000,VITVI01G01311,VITVI01G01564,VITVI01G00355,VITVI01G00800,VITVI01G00823,VITVI01G00681,VITVI01G00594,VITVI01G01774,VITVI01G01758,VITVI02G00023,VITVI02G00187,VITVI02G00189,VITVI02G00320,VITVI02G01204,VITVI02G00950,VITVI02G00483,VITVI03G00254,VITVI03G00283,VITVI03G00452,VITVI03G00331,VITVI03G00721,VITVI03…
GO:MF	translation regulator activity	GO:0045182	0.00601224	2.22096	187	925	14	35134	VITVI10G02255,VITVI01G00572,VITVI04G00640,VITVI05G00818,VITVI06G00696,VITVI06G01501,VITVI07G00186,VITVI13G00354,VITVI13G00101,VITVI14G00132,VITVI14G01385,VITVI17G00250,VITVI18G02360,VITVI19G00498
GO:MF	protein disulfide isomerase activity	GO:0003756	0.00646649	2.18933	15	925	4	35134	VITVI01G00382,VITVI12G00453,VITVI13G00602,VITVI14G00111
GO:MF	intramolecular oxidoreductase activity, transposing S-S bonds	GO:0016864	0.00646649	2.18933	15	925	4	35134	VITVI01G00382,VITVI12G00453,VITVI13G00602,VITVI14G00111
GO:MF	carbohydrate derivative binding	GO:0097367	0.00703227	2.1529	4307	925	147	35134	VITVI10G00217,VITVI07G01393,VITVI00G04504,VITVI00G04505,VITVI15G04488,VITVI10G00275,VITVI08G04000,VITVI01G01311,VITVI01G01564,VITVI01G00355,VITVI01G00800,VITVI01G00823,VITVI01G00681,VITVI01G00594,VITVI01G01774,VITVI01G01758,VITVI02G00023,VITVI02G00187,VITVI02G00189,VITVI02G00320,VITVI02G01204,VITVI02G00950,VITVI02G00483,VITVI03G00254,VITVI03G00283,VITVI03G00452,VITVI03G00331,VITVI03G00721,VITVI03…
GO:MF	U3 snoRNA binding	GO:0034511	0.00714403	2.14606	7	925	3	35134	VITVI10G00908,VITVI16G00096,VITVI18G00099
GO:MF	thiosulfate sulfurtransferase activity	GO:0004792	0.0080555	2.09391	2	925	2	35134	VITVI19G01681,VITVI19G00551
GO:MF	aspartate-tRNA ligase activity	GO:0004815	0.0080555	2.09391	2	925	2	35134	VITVI03G00728,VITVI04G00265
GO:MF	acetolactate synthase regulator activity	GO:1990610	0.0080555	2.09391	2	925	2	35134	VITVI07G01247,VITVI05G01660
GO:MF	protein-containing complex binding	GO:0044877	0.00853265	2.06892	364	925	21	35134	VITVI01G00173,VITVI02G00645,VITVI03G01600,VITVI05G01486,VITVI06G00696,VITVI06G01934,VITVI07G01877,VITVI07G01599,VITVI09G00211,VITVI10G00713,VITVI11G00149,VITVI12G00288,VITVI13G00354,VITVI13G00361,VITVI13G00101,VITVI14G01703,VITVI14G01405,VITVI14G04569,VITVI17G00582,VITVI19G00569,VITVI19G01438
GO:MF	identical protein binding	GO:0042802	0.00955067	2.01997	94	925	9	35134	VITVI01G01311,VITVI03G00452,VITVI06G01524,VITVI09G00794,VITVI12G00685,VITVI13G01892,VITVI18G00338,VITVI19G00567,VITVI19G01359
GO:MF	translation factor activity, RNA binding	GO:0008135	0.0102933	1.98744	178	925	13	35134	VITVI10G02255,VITVI01G00572,VITVI04G00640,VITVI05G00818,VITVI06G00696,VITVI06G01501,VITVI07G00186,VITVI13G00101,VITVI14G00132,VITVI14G01385,VITVI17G00250,VITVI18G02360,VITVI19G00498
GO:MF	small GTPase binding	GO:0031267	0.0130835	1.88328	31	925	5	35134	VITVI01G04240,VITVI05G01356,VITVI12G01897,VITVI16G00155,VITVI17G00728
GO:MF	disulfide oxidoreductase activity	GO:0015036	0.0130835	1.88328	62	925	7	35134	VITVI13G00241,VITVI01G00382,VITVI04G01390,VITVI07G00733,VITVI09G00521,VITVI12G00453,VITVI18G01629
GO:MF	GTPase binding	GO:0051020	0.0172726	1.76264	33	925	5	35134	VITVI01G04240,VITVI05G01356,VITVI12G01897,VITVI16G00155,VITVI17G00728
GO:MF	single-stranded RNA binding	GO:0003727	0.0195627	1.70857	34	925	5	35134	VITVI07G04579,VITVI01G00173,VITVI07G01705,VITVI12G00367,VITVI17G00658
GO:MF	helicase activity	GO:0004386	0.0200137	1.69867	193	925	13	35134	VITVI01G01564,VITVI01G00823,VITVI06G01501,VITVI08G00039,VITVI12G00003,VITVI13G00111,VITVI14G01436,VITVI15G00050,VITVI17G00388,VITVI17G00681,VITVI18G01543,VITVI18G01182,VITVI19G01704
GO:MF	glycine-tRNA ligase activity	GO:0004820	0.0210721	1.67629	3	925	2	35134	VITVI01G01774,VITVI17G00022
GO:MF	protein-disulfide reductase activity	GO:0015035	0.0294357	1.53113	54	925	6	35134	VITVI01G00382,VITVI04G01390,VITVI07G00733,VITVI09G00521,VITVI12G00453,VITVI18G01629
GO:MF	hydrolase activity, acting on carbon-nitrogen (but not peptide) bonds	GO:0016810	0.0331869	1.47903	136	925	10	35134	VITVI01G01563,VITVI03G00995,VITVI04G00144,VITVI04G01183,VITVI06G00574,VITVI12G00115,VITVI13G01416,VITVI14G00998,VITVI15G01158,VITVI18G02388
GO:MF	ubiquitin-like modifier activating enzyme activity	GO:0008641	0.0333356	1.47709	12	925	3	35134	VITVI03G00283,VITVI08G00752,VITVI19G00551
GO:MF	oxidoreductase activity, acting on the CH-CH group of donors	GO:0016627	0.0357012	1.44732	95	925	8	35134	VITVI01G01376,VITVI03G01309,VITVI05G02268,VITVI05G01692,VITVI08G01676,VITVI09G00719,VITVI15G00812,VITVI19G00767
GO:MF	ligase activity, forming carbon-sulfur bonds	GO:0016877	0.0372905	1.4284	40	925	5	35134	VITVI03G00283,VITVI08G00752,VITVI17G00148,VITVI17G01162,VITVI19G00551
GO:BP	organic substance biosynthetic process	GO:1901576	4.86518e-45	44.3129	6177	925	347	35134	VITVI07G00078,VITVI10G00217,VITVI07G02582,VITVI07G01405,VITVI07G01247,VITVI17G01311,VITVI07G01393,VITVI10G00387,VITVI04G01545,VITVI02G01712,VITVI15G04488,VITVI07G04669,VITVI07G02548,VITVI10G02255,VITVI13G04616,VITVI08G04000,VITVI01G01311,VITVI01G01372,VITVI01G01564,VITVI01G00156,VITVI01G00173,VITVI01G00245,VITVI01G00333,VITVI01G00355,VITVI01G00382,VITVI01G04125,VITVI01G00572,VITVI01G00800,VITVI01…
GO:BP	cellular biosynthetic process	GO:0044249	1.83857e-44	43.7355	6060	925	341	35134	VITVI07G00078,VITVI10G00217,VITVI07G02582,VITVI07G01405,VITVI07G01247,VITVI17G01311,VITVI07G01393,VITVI10G00387,VITVI04G01545,VITVI02G01712,VITVI15G04488,VITVI07G04669,VITVI07G02548,VITVI10G02255,VITVI13G04616,VITVI08G04000,VITVI01G01311,VITVI01G01372,VITVI01G01564,VITVI01G00156,VITVI01G00173,VITVI01G00245,VITVI01G00333,VITVI01G00355,VITVI01G00382,VITVI01G04125,VITVI01G00572,VITVI01G00800,VITVI01…
GO:BP	biosynthetic process	GO:0009058	4.13233e-44	43.3838	6350	925	350	35134	VITVI07G00078,VITVI10G00217,VITVI07G02582,VITVI07G01405,VITVI07G01247,VITVI17G01311,VITVI07G01393,VITVI10G00387,VITVI04G01545,VITVI02G01712,VITVI15G04488,VITVI07G04669,VITVI07G02548,VITVI10G02255,VITVI13G04616,VITVI08G04000,VITVI01G01311,VITVI01G01372,VITVI01G01564,VITVI01G00156,VITVI01G00173,VITVI01G00245,VITVI01G00333,VITVI01G00355,VITVI01G00382,VITVI01G04125,VITVI01G00572,VITVI01G00800,VITVI01…
GO:BP	cellular process	GO:0009987	3.27398e-41	40.4849	14813	925	597	35134	VITVI10G01219,VITVI07G00078,VITVI10G00217,VITVI07G02582,VITVI07G04489,VITVI07G01405,VITVI07G01247,VITVI07G04463,VITVI00G04569,VITVI08G02419,VITVI04G01526,VITVI17G01311,VITVI13G00241,VITVI13G00233,VITVI07G01393,VITVI10G00387,VITVI04G01545,VITVI00G04504,VITVI00G04505,VITVI02G01712,VITVI15G04488,VITVI07G04669,VITVI10G00275,VITVI07G02548,VITVI00G04706,VITVI10G02255,VITVI10G04134,VITVI13G04616,VITVI08…
GO:BP	gene expression	GO:0010467	2.68471e-38	37.5711	4257	925	261	35134	VITVI07G00078,VITVI10G00217,VITVI07G02582,VITVI07G01405,VITVI17G01311,VITVI07G01393,VITVI10G00387,VITVI04G01545,VITVI02G01712,VITVI15G04488,VITVI07G02548,VITVI10G02255,VITVI08G04000,VITVI01G01311,VITVI01G00156,VITVI01G00173,VITVI01G00245,VITVI01G00355,VITVI01G00382,VITVI01G04125,VITVI01G00572,VITVI01G00800,VITVI01G00825,VITVI01G00971,VITVI01G02047,VITVI01G02053,VITVI01G00594,VITVI01G00613,VITVI01…
GO:BP	macromolecule biosynthetic process	GO:0009059	1.15022e-36	35.9392	4838	925	279	35134	VITVI07G00078,VITVI10G00217,VITVI07G02582,VITVI07G01405,VITVI17G01311,VITVI07G01393,VITVI10G00387,VITVI04G01545,VITVI02G01712,VITVI15G04488,VITVI07G02548,VITVI10G02255,VITVI08G04000,VITVI01G01311,VITVI01G01372,VITVI01G00156,VITVI01G00173,VITVI01G00245,VITVI01G00355,VITVI01G00382,VITVI01G04125,VITVI01G00572,VITVI01G00800,VITVI01G00825,VITVI01G00971,VITVI01G02047,VITVI01G02053,VITVI01G00594,VITVI01…
GO:BP	biological_process	GO:0008150	2.92334e-36	35.5341	18606	925	680	35134	VITVI10G01219,VITVI07G01205,VITVI07G00078,VITVI10G00217,VITVI07G02582,VITVI13G04636,VITVI07G04489,VITVI07G01405,VITVI07G01247,VITVI07G04463,VITVI02G00565,VITVI00G04569,VITVI08G02419,VITVI04G01526,VITVI15G04172,VITVI17G01311,VITVI13G00241,VITVI13G00233,VITVI07G01393,VITVI10G04226,VITVI10G00387,VITVI04G01545,VITVI00G04504,VITVI00G04505,VITVI02G01712,VITVI15G04488,VITVI07G04669,VITVI10G00275,VITVI07…
GO:BP	ribonucleoprotein complex biogenesis	GO:0022613	1.26913e-34	33.8965	474	925	76	35134	VITVI10G00387,VITVI04G01545,VITVI10G02255,VITVI01G00173,VITVI01G04125,VITVI01G00572,VITVI01G00971,VITVI01G00599,VITVI02G00341,VITVI03G00089,VITVI04G00134,VITVI04G00640,VITVI04G01298,VITVI04G00980,VITVI05G01254,VITVI05G01593,VITVI06G00211,VITVI06G01406,VITVI06G04445,VITVI07G01999,VITVI07G00171,VITVI07G00195,VITVI07G00226,VITVI07G01162,VITVI08G01233,VITVI08G01588,VITVI08G01652,VITVI08G01709,VITVI08…
GO:BP	RNA processing	GO:0006396	2.4324e-34	33.614	879	925	102	35134	VITVI07G01405,VITVI10G00387,VITVI04G01545,VITVI01G00156,VITVI01G00355,VITVI01G04125,VITVI01G02047,VITVI01G02053,VITVI01G01815,VITVI02G00341,VITVI04G00134,VITVI04G00152,VITVI04G00235,VITVI04G00332,VITVI04G01298,VITVI04G02028,VITVI05G00836,VITVI05G01254,VITVI05G00147,VITVI05G00125,VITVI05G01593,VITVI06G00073,VITVI06G00538,VITVI06G04198,VITVI06G00658,VITVI06G04445,VITVI07G01877,VITVI07G01999,VITVI07…
GO:BP	organic substance metabolic process	GO:0071704	1.18928e-31	30.9247	12549	925	509	35134	VITVI07G01205,VITVI07G00078,VITVI10G00217,VITVI07G02582,VITVI13G04636,VITVI07G01405,VITVI07G01247,VITVI02G00565,VITVI00G04569,VITVI15G04172,VITVI17G01311,VITVI13G00241,VITVI07G01393,VITVI10G04226,VITVI10G00387,VITVI04G01545,VITVI00G04504,VITVI00G04505,VITVI02G01712,VITVI15G04488,VITVI07G04669,VITVI07G02548,VITVI00G04706,VITVI10G02255,VITVI10G04134,VITVI13G04616,VITVI08G04000,VITVI00G04799,VITVI01…
GO:BP	metabolic process	GO:0008152	2.6042e-31	30.5843	13524	925	535	35134	VITVI07G01205,VITVI07G00078,VITVI10G00217,VITVI07G02582,VITVI13G04636,VITVI07G01405,VITVI07G01247,VITVI02G00565,VITVI00G04569,VITVI15G04172,VITVI17G01311,VITVI13G00241,VITVI07G01393,VITVI10G04226,VITVI10G00387,VITVI04G01545,VITVI00G04504,VITVI00G04505,VITVI02G01712,VITVI15G04488,VITVI07G04669,VITVI07G02548,VITVI00G04706,VITVI10G02255,VITVI10G04134,VITVI13G04616,VITVI08G04000,VITVI00G04799,VITVI01…
GO:BP	organonitrogen compound biosynthetic process	GO:1901566	4.67298e-31	30.3304	1565	925	133	35134	VITVI07G02582,VITVI07G01247,VITVI02G01712,VITVI07G04669,VITVI07G02548,VITVI10G02255,VITVI13G04616,VITVI08G04000,VITVI01G01372,VITVI01G00173,VITVI01G00333,VITVI01G00572,VITVI01G00800,VITVI01G00971,VITVI01G01774,VITVI01G01758,VITVI02G00194,VITVI02G01272,VITVI03G01190,VITVI03G01309,VITVI03G00995,VITVI03G00254,VITVI03G00331,VITVI03G00728,VITVI04G00064,VITVI04G00265,VITVI04G00554,VITVI04G00640,VITVI04…
GO:BP	cellular component organization or biogenesis	GO:0071840	9.18293e-31	30.037	2491	925	174	35134	VITVI08G02419,VITVI10G00387,VITVI04G01545,VITVI10G02255,VITVI10G04134,VITVI01G01457,VITVI01G01620,VITVI01G02268,VITVI01G00173,VITVI01G04125,VITVI01G00572,VITVI01G00971,VITVI01G00599,VITVI02G00274,VITVI02G00341,VITVI02G00433,VITVI02G01272,VITVI02G00554,VITVI03G00089,VITVI03G00523,VITVI03G00721,VITVI03G01600,VITVI03G00848,VITVI04G00134,VITVI04G00261,VITVI04G00414,VITVI04G00465,VITVI04G00640,VITVI04…
GO:BP	cellular metabolic process	GO:0044237	3.54714e-30	29.4501	10831	925	455	35134	VITVI07G00078,VITVI10G00217,VITVI07G02582,VITVI07G01405,VITVI07G01247,VITVI00G04569,VITVI17G01311,VITVI13G00241,VITVI07G01393,VITVI10G00387,VITVI04G01545,VITVI00G04504,VITVI00G04505,VITVI02G01712,VITVI15G04488,VITVI07G04669,VITVI07G02548,VITVI00G04706,VITVI10G02255,VITVI10G04134,VITVI13G04616,VITVI08G04000,VITVI01G01311,VITVI01G01372,VITVI01G01564,VITVI01G00132,VITVI01G00156,VITVI01G00173,VITVI01…
GO:BP	primary metabolic process	GO:0044238	3.54714e-30	29.4501	11731	925	481	35134	VITVI07G01205,VITVI07G00078,VITVI10G00217,VITVI07G02582,VITVI13G04636,VITVI07G01405,VITVI07G01247,VITVI02G00565,VITVI00G04569,VITVI15G04172,VITVI17G01311,VITVI13G00241,VITVI07G01393,VITVI10G04226,VITVI10G00387,VITVI04G01545,VITVI00G04504,VITVI00G04505,VITVI02G01712,VITVI15G04488,VITVI07G04669,VITVI07G02548,VITVI00G04706,VITVI10G02255,VITVI10G04134,VITVI13G04616,VITVI08G04000,VITVI00G04799,VITVI01…
GO:BP	ncRNA metabolic process	GO:0034660	3.54714e-30	29.4501	569	925	77	35134	VITVI04G01545,VITVI08G04000,VITVI01G00800,VITVI01G01774,VITVI02G00341,VITVI03G00331,VITVI03G00728,VITVI04G00134,VITVI04G00235,VITVI04G00265,VITVI04G01298,VITVI05G01254,VITVI05G01593,VITVI06G04445,VITVI07G01892,VITVI07G01999,VITVI07G00171,VITVI07G00195,VITVI07G00226,VITVI07G01162,VITVI08G01233,VITVI08G01588,VITVI08G01652,VITVI08G01813,VITVI08G01027,VITVI08G01971,VITVI08G00640,VITVI09G00015,VITVI09…
GO:BP	ribosome biogenesis	GO:0042254	4.74193e-30	29.324	387	925	64	35134	VITVI04G01545,VITVI01G00971,VITVI01G00599,VITVI02G00341,VITVI03G00089,VITVI04G00134,VITVI04G01298,VITVI04G00980,VITVI05G01254,VITVI05G01593,VITVI06G00211,VITVI06G01406,VITVI06G04445,VITVI07G01999,VITVI07G00171,VITVI07G00195,VITVI07G00226,VITVI07G01162,VITVI08G01233,VITVI08G01588,VITVI08G01652,VITVI08G01709,VITVI08G01796,VITVI08G01813,VITVI08G01027,VITVI08G01971,VITVI08G00640,VITVI09G00015,VITVI09…
GO:BP	nitrogen compound metabolic process	GO:0006807	9.2219e-30	29.0352	10133	925	433	35134	VITVI07G01205,VITVI07G00078,VITVI10G00217,VITVI07G02582,VITVI13G04636,VITVI07G01405,VITVI07G01247,VITVI00G04569,VITVI15G04172,VITVI17G01311,VITVI13G00241,VITVI07G01393,VITVI10G04226,VITVI10G00387,VITVI04G01545,VITVI00G04504,VITVI00G04505,VITVI02G01712,VITVI15G04488,VITVI07G04669,VITVI07G02548,VITVI00G04706,VITVI10G02255,VITVI10G04134,VITVI13G04616,VITVI08G04000,VITVI01G01311,VITVI01G01372,VITVI01…
GO:BP	ncRNA processing	GO:0034470	5.71437e-26	25.243	440	925	63	35134	VITVI04G01545,VITVI02G00341,VITVI04G00134,VITVI04G00235,VITVI04G01298,VITVI05G01254,VITVI05G01593,VITVI06G04445,VITVI07G01999,VITVI07G00171,VITVI07G00195,VITVI07G00226,VITVI07G01162,VITVI08G01233,VITVI08G01588,VITVI08G01652,VITVI08G01813,VITVI08G01027,VITVI08G01971,VITVI08G00640,VITVI09G00015,VITVI09G00224,VITVI09G01927,VITVI09G01387,VITVI09G00980,VITVI10G00713,VITVI10G00908,VITVI11G00316,VITVI11…
GO:BP	cellular component biogenesis	GO:0044085	2.46572e-25	24.6081	1158	925	103	35134	VITVI08G02419,VITVI10G00387,VITVI04G01545,VITVI10G02255,VITVI01G00173,VITVI01G04125,VITVI01G00572,VITVI01G00971,VITVI01G00599,VITVI02G00341,VITVI02G01272,VITVI03G00089,VITVI03G00523,VITVI04G00134,VITVI04G00465,VITVI04G00640,VITVI04G01298,VITVI04G00980,VITVI05G01254,VITVI05G01593,VITVI06G00211,VITVI06G01406,VITVI06G04445,VITVI07G01692,VITVI07G01999,VITVI07G00171,VITVI07G00195,VITVI07G00226,VITVI07…
GO:BP	translation	GO:0006412	1.27293e-24	23.8952	781	925	82	35134	VITVI07G02582,VITVI02G01712,VITVI07G02548,VITVI10G02255,VITVI08G04000,VITVI01G00173,VITVI01G00572,VITVI01G00800,VITVI01G00971,VITVI01G01774,VITVI02G00194,VITVI03G01190,VITVI03G00331,VITVI03G00728,VITVI04G00064,VITVI04G00265,VITVI04G00554,VITVI04G00640,VITVI04G02132,VITVI04G00980,VITVI05G00254,VITVI05G00818,VITVI05G01254,VITVI05G00060,VITVI05G00033,VITVI06G00041,VITVI06G00651,VITVI06G00696,VITVI06…
GO:BP	peptide biosynthetic process	GO:0043043	1.57351e-24	23.8031	784	925	82	35134	VITVI07G02582,VITVI02G01712,VITVI07G02548,VITVI10G02255,VITVI08G04000,VITVI01G00173,VITVI01G00572,VITVI01G00800,VITVI01G00971,VITVI01G01774,VITVI02G00194,VITVI03G01190,VITVI03G00331,VITVI03G00728,VITVI04G00064,VITVI04G00265,VITVI04G00554,VITVI04G00640,VITVI04G02132,VITVI04G00980,VITVI05G00254,VITVI05G00818,VITVI05G01254,VITVI05G00060,VITVI05G00033,VITVI06G00041,VITVI06G00651,VITVI06G00696,VITVI06…
GO:BP	amide biosynthetic process	GO:0043604	2.18509e-24	23.6605	843	925	85	35134	VITVI07G02582,VITVI02G01712,VITVI07G02548,VITVI10G02255,VITVI08G04000,VITVI01G00173,VITVI01G00572,VITVI01G00800,VITVI01G00971,VITVI01G01774,VITVI02G00194,VITVI03G01190,VITVI03G00331,VITVI03G00728,VITVI04G00064,VITVI04G00265,VITVI04G00554,VITVI04G00640,VITVI04G02132,VITVI04G00980,VITVI04G02037,VITVI05G00254,VITVI05G00818,VITVI05G01254,VITVI05G00060,VITVI05G00033,VITVI06G00041,VITVI06G00651,VITVI06…
GO:BP	cellular nitrogen compound metabolic process	GO:0034641	1.85723e-23	22.7311	5978	925	284	35134	VITVI07G00078,VITVI07G02582,VITVI07G01405,VITVI00G04569,VITVI10G00387,VITVI04G01545,VITVI02G01712,VITVI07G02548,VITVI00G04706,VITVI10G02255,VITVI10G04134,VITVI08G04000,VITVI01G01564,VITVI01G00132,VITVI01G00156,VITVI01G00173,VITVI01G00245,VITVI01G00333,VITVI01G00355,VITVI01G04125,VITVI01G00572,VITVI01G00800,VITVI01G00971,VITVI01G02047,VITVI01G02053,VITVI01G01774,VITVI01G01815,VITVI02G01314,VITVI02…
GO:BP	peptide metabolic process	GO:0006518	3.01568e-23	22.5206	821	925	82	35134	VITVI07G02582,VITVI02G01712,VITVI07G02548,VITVI10G02255,VITVI08G04000,VITVI01G00173,VITVI01G00572,VITVI01G00800,VITVI01G00971,VITVI01G01774,VITVI02G00194,VITVI03G01190,VITVI03G00331,VITVI03G00728,VITVI04G00064,VITVI04G00265,VITVI04G00554,VITVI04G00640,VITVI04G02132,VITVI04G00980,VITVI05G00254,VITVI05G00818,VITVI05G01254,VITVI05G00060,VITVI05G00033,VITVI06G00041,VITVI06G00651,VITVI06G00696,VITVI06…
GO:BP	rRNA metabolic process	GO:0016072	5.44247e-23	22.2642	283	925	48	35134	VITVI04G01545,VITVI02G00341,VITVI04G00134,VITVI04G01298,VITVI05G01254,VITVI05G01593,VITVI06G04445,VITVI07G01892,VITVI07G01999,VITVI07G00171,VITVI07G00195,VITVI07G00226,VITVI07G01162,VITVI08G01233,VITVI08G01588,VITVI08G01652,VITVI08G01813,VITVI08G01027,VITVI08G01971,VITVI08G00640,VITVI09G00015,VITVI09G01927,VITVI09G01387,VITVI09G00980,VITVI10G00713,VITVI10G00908,VITVI11G00452,VITVI12G00164,VITVI12…
GO:BP	rRNA processing	GO:0006364	7.09631e-23	22.149	272	925	47	35134	VITVI04G01545,VITVI02G00341,VITVI04G00134,VITVI04G01298,VITVI05G01254,VITVI05G01593,VITVI06G04445,VITVI07G01999,VITVI07G00171,VITVI07G00195,VITVI07G00226,VITVI07G01162,VITVI08G01233,VITVI08G01588,VITVI08G01652,VITVI08G01813,VITVI08G01027,VITVI08G01971,VITVI08G00640,VITVI09G00015,VITVI09G01927,VITVI09G01387,VITVI09G00980,VITVI10G00713,VITVI10G00908,VITVI11G00452,VITVI12G00164,VITVI12G00264,VITVI12…
GO:BP	amide metabolic process	GO:0043603	1.98419e-22	21.7024	942	925	87	35134	VITVI07G02582,VITVI02G01712,VITVI07G02548,VITVI10G02255,VITVI08G04000,VITVI01G01563,VITVI01G00173,VITVI01G00572,VITVI01G00800,VITVI01G00971,VITVI01G01774,VITVI02G00194,VITVI03G01190,VITVI03G00331,VITVI03G00728,VITVI04G00064,VITVI04G00265,VITVI04G00554,VITVI04G00640,VITVI04G02132,VITVI04G00980,VITVI04G02037,VITVI05G00254,VITVI05G00818,VITVI05G01254,VITVI05G00060,VITVI05G00033,VITVI06G00041,VITVI06…
GO:BP	organonitrogen compound metabolic process	GO:1901564	2.22966e-22	21.6518	5778	925	274	35134	VITVI07G01205,VITVI10G00217,VITVI07G02582,VITVI13G04636,VITVI07G01405,VITVI07G01247,VITVI00G04569,VITVI15G04172,VITVI17G01311,VITVI13G00241,VITVI07G01393,VITVI10G04226,VITVI00G04504,VITVI00G04505,VITVI02G01712,VITVI15G04488,VITVI07G04669,VITVI07G02548,VITVI10G02255,VITVI13G04616,VITVI08G04000,VITVI01G01311,VITVI01G01372,VITVI01G01563,VITVI01G00132,VITVI01G00166,VITVI01G00173,VITVI01G01902,VITVI01…
GO:BP	macromolecule metabolic process	GO:0043170	2.36024e-22	21.627	9741	925	398	35134	VITVI07G01205,VITVI07G00078,VITVI10G00217,VITVI07G02582,VITVI13G04636,VITVI07G01405,VITVI15G04172,VITVI17G01311,VITVI13G00241,VITVI07G01393,VITVI10G04226,VITVI10G00387,VITVI04G01545,VITVI00G04504,VITVI00G04505,VITVI02G01712,VITVI15G04488,VITVI07G02548,VITVI00G04706,VITVI10G02255,VITVI10G04134,VITVI08G04000,VITVI01G01311,VITVI01G01372,VITVI01G01564,VITVI01G00156,VITVI01G00166,VITVI01G00173,VITVI01…
GO:BP	protein folding	GO:0006457	1.2016e-17	16.9202	301	925	43	35134	VITVI10G00217,VITVI17G01311,VITVI07G01393,VITVI15G04488,VITVI01G01311,VITVI01G00382,VITVI01G00594,VITVI01G01708,VITVI02G00645,VITVI02G00187,VITVI04G01014,VITVI05G01545,VITVI06G00032,VITVI06G01295,VITVI07G00394,VITVI07G02050,VITVI08G01818,VITVI09G00045,VITVI09G00186,VITVI09G00635,VITVI09G00876,VITVI10G00496,VITVI10G00049,VITVI12G00288,VITVI13G02014,VITVI13G02016,VITVI13G00405,VITVI13G00409,VITVI13…
GO:BP	protein maturation	GO:0051604	2.61524e-15	14.5825	396	925	46	35134	VITVI10G00217,VITVI17G01311,VITVI07G01393,VITVI15G04488,VITVI01G01311,VITVI01G00382,VITVI01G00594,VITVI01G01708,VITVI02G00645,VITVI02G00187,VITVI03G00485,VITVI04G01014,VITVI05G01545,VITVI06G00032,VITVI06G01295,VITVI07G00394,VITVI07G02050,VITVI08G01818,VITVI09G00045,VITVI09G00186,VITVI09G00635,VITVI09G00876,VITVI10G00496,VITVI10G01564,VITVI10G00049,VITVI12G00288,VITVI13G02014,VITVI13G02016,VITVI13…
GO:BP	small molecule metabolic process	GO:0044281	5.92625e-15	14.2272	1516	925	99	35134	VITVI07G01405,VITVI07G01247,VITVI02G00565,VITVI00G04569,VITVI13G00241,VITVI07G04669,VITVI13G04616,VITVI08G04000,VITVI01G01563,VITVI01G01564,VITVI01G00132,VITVI01G00333,VITVI01G00800,VITVI01G01774,VITVI01G01758,VITVI03G00995,VITVI03G00254,VITVI03G00452,VITVI03G00331,VITVI03G00728,VITVI04G00144,VITVI04G00265,VITVI04G00537,VITVI04G00597,VITVI04G01183,VITVI04G01193,VITVI04G02037,VITVI04G01645,VITVI04…
GO:BP	cellular component organization	GO:0016043	1.58681e-14	13.7995	2116	925	122	35134	VITVI08G02419,VITVI10G00387,VITVI10G02255,VITVI10G04134,VITVI01G01457,VITVI01G01620,VITVI01G02268,VITVI01G00173,VITVI01G04125,VITVI01G00572,VITVI01G00599,VITVI02G00274,VITVI02G00433,VITVI02G01272,VITVI02G00554,VITVI03G00523,VITVI03G00721,VITVI03G01600,VITVI03G00848,VITVI04G00261,VITVI04G00414,VITVI04G00465,VITVI04G00640,VITVI04G01183,VITVI04G01319,VITVI04G00980,VITVI04G01037,VITVI04G01689,VITVI05…
GO:BP	protein metabolic process	GO:0019538	5.7955e-14	13.2369	4830	925	216	35134	VITVI07G01205,VITVI10G00217,VITVI07G02582,VITVI13G04636,VITVI15G04172,VITVI17G01311,VITVI13G00241,VITVI07G01393,VITVI10G04226,VITVI00G04504,VITVI00G04505,VITVI02G01712,VITVI15G04488,VITVI07G02548,VITVI10G02255,VITVI08G04000,VITVI01G01311,VITVI01G01372,VITVI01G00166,VITVI01G00173,VITVI01G01902,VITVI01G00245,VITVI01G00382,VITVI01G00572,VITVI01G00800,VITVI01G00971,VITVI01G01023,VITVI01G00594,VITVI01…
GO:BP	RNA metabolic process	GO:0016070	1.0096e-12	11.9959	3731	925	175	35134	VITVI07G00078,VITVI07G01405,VITVI10G00387,VITVI04G01545,VITVI00G04706,VITVI10G04134,VITVI08G04000,VITVI01G00156,VITVI01G00245,VITVI01G00355,VITVI01G04125,VITVI01G00800,VITVI01G02047,VITVI01G02053,VITVI01G01774,VITVI01G01815,VITVI02G01314,VITVI02G00341,VITVI03G00331,VITVI03G00728,VITVI03G01600,VITVI03G00543,VITVI04G00092,VITVI04G00134,VITVI04G00152,VITVI04G00184,VITVI04G00235,VITVI04G00265,VITVI04…
GO:BP	carboxylic acid metabolic process	GO:0019752	2.16615e-12	11.6643	950	925	69	35134	VITVI07G01405,VITVI07G01247,VITVI13G00241,VITVI07G04669,VITVI13G04616,VITVI08G04000,VITVI01G00800,VITVI01G01774,VITVI01G01758,VITVI03G00452,VITVI03G00331,VITVI03G00728,VITVI04G00144,VITVI04G00265,VITVI04G00537,VITVI04G00597,VITVI04G01193,VITVI04G02037,VITVI04G00860,VITVI05G01660,VITVI05G01692,VITVI05G01408,VITVI06G00158,VITVI06G00346,VITVI06G00574,VITVI06G00659,VITVI06G00723,VITVI07G00362,VITVI07…
GO:BP	oxoacid metabolic process	GO:0043436	4.24579e-12	11.372	964	925	69	35134	VITVI07G01405,VITVI07G01247,VITVI13G00241,VITVI07G04669,VITVI13G04616,VITVI08G04000,VITVI01G00800,VITVI01G01774,VITVI01G01758,VITVI03G00452,VITVI03G00331,VITVI03G00728,VITVI04G00144,VITVI04G00265,VITVI04G00537,VITVI04G00597,VITVI04G01193,VITVI04G02037,VITVI04G00860,VITVI05G01660,VITVI05G01692,VITVI05G01408,VITVI06G00158,VITVI06G00346,VITVI06G00574,VITVI06G00659,VITVI06G00723,VITVI07G00362,VITVI07…
GO:BP	organic acid metabolic process	GO:0006082	4.34627e-12	11.3619	965	925	69	35134	VITVI07G01405,VITVI07G01247,VITVI13G00241,VITVI07G04669,VITVI13G04616,VITVI08G04000,VITVI01G00800,VITVI01G01774,VITVI01G01758,VITVI03G00452,VITVI03G00331,VITVI03G00728,VITVI04G00144,VITVI04G00265,VITVI04G00537,VITVI04G00597,VITVI04G01193,VITVI04G02037,VITVI04G00860,VITVI05G01660,VITVI05G01692,VITVI05G01408,VITVI06G00158,VITVI06G00346,VITVI06G00574,VITVI06G00659,VITVI06G00723,VITVI07G00362,VITVI07…
GO:BP	heterocycle metabolic process	GO:0046483	1.26137e-11	10.8992	5500	925	229	35134	VITVI07G00078,VITVI07G01405,VITVI00G04569,VITVI13G00241,VITVI10G00387,VITVI04G01545,VITVI00G04706,VITVI10G04134,VITVI08G04000,VITVI01G01564,VITVI01G00132,VITVI01G00156,VITVI01G00245,VITVI01G00333,VITVI01G00355,VITVI01G04125,VITVI01G00800,VITVI01G02047,VITVI01G02053,VITVI01G01774,VITVI01G01815,VITVI02G01314,VITVI02G00341,VITVI02G00444,VITVI03G01309,VITVI03G00995,VITVI03G00254,VITVI03G00331,VITVI03…
GO:BP	organic cyclic compound metabolic process	GO:1901360	1.32763e-11	10.8769	5789	925	238	35134	VITVI07G00078,VITVI07G01405,VITVI00G04569,VITVI13G00241,VITVI10G00387,VITVI04G01545,VITVI00G04706,VITVI10G04134,VITVI13G04616,VITVI08G04000,VITVI01G01376,VITVI01G01564,VITVI01G00132,VITVI01G00156,VITVI01G00245,VITVI01G00333,VITVI01G00355,VITVI01G04125,VITVI01G00800,VITVI01G02047,VITVI01G02053,VITVI01G01774,VITVI01G01782,VITVI01G01815,VITVI02G01314,VITVI02G00341,VITVI02G00444,VITVI03G01309,VITVI03…
GO:BP	ribosomal small subunit biogenesis	GO:0042274	4.21232e-11	10.3755	76	925	18	35134	VITVI01G00971,VITVI02G00341,VITVI04G00980,VITVI05G01254,VITVI05G01593,VITVI06G04445,VITVI08G01588,VITVI08G01652,VITVI08G01796,VITVI09G00015,VITVI09G00043,VITVI11G00452,VITVI12G00264,VITVI14G01290,VITVI15G01001,VITVI16G00096,VITVI18G00540,VITVI18G00099
GO:BP	protein transport	GO:0015031	5.76869e-11	10.2389	666	925	53	35134	VITVI07G04463,VITVI04G01526,VITVI13G00233,VITVI01G01311,VITVI01G01372,VITVI01G01620,VITVI01G04240,VITVI01G00599,VITVI01G00613,VITVI02G00662,VITVI02G00111,VITVI02G00274,VITVI02G00950,VITVI02G00554,VITVI03G00344,VITVI03G00848,VITVI04G00125,VITVI04G01319,VITVI04G01014,VITVI04G01037,VITVI05G01356,VITVI06G00510,VITVI06G00669,VITVI06G00700,VITVI07G00464,VITVI08G00924,VITVI09G00319,VITVI09G00876,VITVI10…
GO:BP	establishment of protein localization	GO:0045184	7.96149e-11	10.099	672	925	53	35134	VITVI07G04463,VITVI04G01526,VITVI13G00233,VITVI01G01311,VITVI01G01372,VITVI01G01620,VITVI01G04240,VITVI01G00599,VITVI01G00613,VITVI02G00662,VITVI02G00111,VITVI02G00274,VITVI02G00950,VITVI02G00554,VITVI03G00344,VITVI03G00848,VITVI04G00125,VITVI04G01319,VITVI04G01014,VITVI04G01037,VITVI05G01356,VITVI06G00510,VITVI06G00669,VITVI06G00700,VITVI07G00464,VITVI08G00924,VITVI09G00319,VITVI09G00876,VITVI10…
GO:BP	mRNA metabolic process	GO:0016071	7.99122e-11	10.0974	489	925	44	35134	VITVI10G00387,VITVI01G00156,VITVI01G00355,VITVI01G04125,VITVI01G02047,VITVI01G02053,VITVI01G01815,VITVI04G00152,VITVI05G00147,VITVI05G00125,VITVI06G00073,VITVI06G00538,VITVI06G04198,VITVI06G00658,VITVI06G01524,VITVI07G01877,VITVI07G00195,VITVI08G01511,VITVI08G01822,VITVI08G00039,VITVI09G00137,VITVI09G00969,VITVI11G00170,VITVI11G00452,VITVI11G00595,VITVI12G01799,VITVI12G02034,VITVI12G00367,VITVI13…
GO:BP	cellular macromolecule localization	GO:0070727	1.037e-10	9.98422	742	925	56	35134	VITVI07G04463,VITVI04G01526,VITVI13G00233,VITVI01G01311,VITVI01G01372,VITVI01G01620,VITVI01G04240,VITVI01G00599,VITVI01G00613,VITVI02G00662,VITVI02G00111,VITVI02G00274,VITVI02G00950,VITVI02G00554,VITVI03G00344,VITVI03G00848,VITVI04G00125,VITVI04G01319,VITVI04G01014,VITVI04G01037,VITVI05G01356,VITVI06G00510,VITVI06G00669,VITVI06G00700,VITVI07G00464,VITVI08G00924,VITVI09G00319,VITVI09G00876,VITVI10…
GO:BP	intracellular transport	GO:0046907	1.08475e-10	9.96467	700	925	54	35134	VITVI04G01526,VITVI01G01311,VITVI01G01372,VITVI01G01620,VITVI01G04240,VITVI01G00599,VITVI01G00613,VITVI02G00274,VITVI02G00950,VITVI02G00554,VITVI03G00344,VITVI03G00848,VITVI04G00125,VITVI04G01298,VITVI04G01319,VITVI04G01014,VITVI04G01037,VITVI05G01356,VITVI06G00510,VITVI06G00669,VITVI06G00700,VITVI07G00464,VITVI08G00924,VITVI09G00015,VITVI09G00319,VITVI09G00876,VITVI10G00619,VITVI10G01065,VITVI11…
GO:BP	macromolecule localization	GO:0033036	1.68616e-10	9.7731	932	925	64	35134	VITVI07G04463,VITVI08G02419,VITVI04G01526,VITVI13G00233,VITVI01G01311,VITVI01G01372,VITVI01G01620,VITVI01G04240,VITVI01G00599,VITVI01G00613,VITVI02G00662,VITVI02G00111,VITVI02G00274,VITVI02G00950,VITVI02G00554,VITVI03G00344,VITVI03G00848,VITVI04G00125,VITVI04G01298,VITVI04G01319,VITVI04G01014,VITVI04G01037,VITVI05G01356,VITVI06G00510,VITVI06G00669,VITVI06G00700,VITVI07G00464,VITVI07G01797,VITVI08…
GO:BP	establishment of protein localization to organelle	GO:0072594	1.70043e-10	9.76944	216	925	28	35134	VITVI04G01526,VITVI01G01311,VITVI01G01620,VITVI01G04240,VITVI02G00274,VITVI02G00554,VITVI03G00848,VITVI04G01014,VITVI05G01356,VITVI06G00510,VITVI06G00700,VITVI09G00319,VITVI09G00876,VITVI11G00263,VITVI11G04093,VITVI12G01897,VITVI12G00706,VITVI13G01222,VITVI14G00696,VITVI14G01545,VITVI14G01999,VITVI15G00613,VITVI15G00148,VITVI17G00728,VITVI18G00338,VITVI19G00043,VITVI19G01702,VITVI19G00567
GO:BP	response to temperature stimulus	GO:0009266	1.71981e-10	9.76452	201	925	27	35134	VITVI07G00078,VITVI10G00217,VITVI07G01393,VITVI01G01311,VITVI01G00681,VITVI01G01815,VITVI03G00389,VITVI04G00092,VITVI05G00561,VITVI08G01672,VITVI09G00045,VITVI09G00224,VITVI09G00635,VITVI12G00288,VITVI12G00685,VITVI13G02014,VITVI13G02016,VITVI13G00405,VITVI13G00409,VITVI13G00410,VITVI13G00491,VITVI13G01770,VITVI17G00171,VITVI18G00338,VITVI18G01553,VITVI19G02080,VITVI19G01359
GO:BP	protein localization	GO:0008104	2.535e-10	9.59602	739	925	55	35134	VITVI07G04463,VITVI04G01526,VITVI13G00233,VITVI01G01311,VITVI01G01372,VITVI01G01620,VITVI01G04240,VITVI01G00599,VITVI01G00613,VITVI02G00662,VITVI02G00111,VITVI02G00274,VITVI02G00950,VITVI02G00554,VITVI03G00344,VITVI03G00848,VITVI04G00125,VITVI04G01319,VITVI04G01014,VITVI04G01037,VITVI05G01356,VITVI06G00510,VITVI06G00669,VITVI06G00700,VITVI07G00464,VITVI08G00924,VITVI09G00319,VITVI09G00876,VITVI10…
GO:BP	tRNA metabolic process	GO:0006399	3.76203e-10	9.42458	256	925	30	35134	VITVI08G04000,VITVI01G00800,VITVI01G01774,VITVI03G00331,VITVI03G00728,VITVI04G00235,VITVI04G00265,VITVI07G00195,VITVI09G00224,VITVI11G00316,VITVI12G00115,VITVI12G00283,VITVI12G01620,VITVI12G00367,VITVI12G00465,VITVI13G01959,VITVI13G00286,VITVI14G01673,VITVI14G01896,VITVI15G00533,VITVI15G00050,VITVI15G00692,VITVI16G00938,VITVI17G00022,VITVI18G02323,VITVI18G02183,VITVI18G00960,VITVI18G01807,VITVI19…
GO:BP	cellular aromatic compound metabolic process	GO:0006725	4.29591e-10	9.36694	5710	925	229	35134	VITVI07G00078,VITVI07G01405,VITVI00G04569,VITVI10G00387,VITVI04G01545,VITVI00G04706,VITVI10G04134,VITVI13G04616,VITVI08G04000,VITVI01G01564,VITVI01G00132,VITVI01G00156,VITVI01G00245,VITVI01G00333,VITVI01G00355,VITVI01G04125,VITVI01G00800,VITVI01G02047,VITVI01G02053,VITVI01G01774,VITVI01G01815,VITVI02G01314,VITVI02G00341,VITVI02G00444,VITVI03G01309,VITVI03G00995,VITVI03G00254,VITVI03G00331,VITVI03…
GO:BP	cellular localization	GO:0051641	4.35695e-10	9.36082	979	925	65	35134	VITVI07G04463,VITVI04G01526,VITVI13G00233,VITVI01G01311,VITVI01G01372,VITVI01G01620,VITVI01G04240,VITVI01G00599,VITVI01G00613,VITVI02G00662,VITVI02G00111,VITVI02G00274,VITVI02G00950,VITVI02G00554,VITVI03G00344,VITVI03G00848,VITVI04G00125,VITVI04G01298,VITVI04G01319,VITVI04G01014,VITVI04G01037,VITVI05G01356,VITVI06G00510,VITVI06G00669,VITVI06G00700,VITVI07G00464,VITVI08G00924,VITVI09G00015,VITVI09…
GO:BP	establishment of localization in cell	GO:0051649	4.38559e-10	9.35797	729	925	54	35134	VITVI04G01526,VITVI01G01311,VITVI01G01372,VITVI01G01620,VITVI01G04240,VITVI01G00599,VITVI01G00613,VITVI02G00274,VITVI02G00950,VITVI02G00554,VITVI03G00344,VITVI03G00848,VITVI04G00125,VITVI04G01298,VITVI04G01319,VITVI04G01014,VITVI04G01037,VITVI05G01356,VITVI06G00510,VITVI06G00669,VITVI06G00700,VITVI07G00464,VITVI08G00924,VITVI09G00015,VITVI09G00319,VITVI09G00876,VITVI10G00619,VITVI10G01065,VITVI11…
GO:BP	organelle organization	GO:0006996	9.83573e-10	9.00719	1168	925	72	35134	VITVI10G04134,VITVI01G01457,VITVI01G01620,VITVI01G02268,VITVI01G00599,VITVI02G00274,VITVI02G00554,VITVI03G00721,VITVI03G00848,VITVI04G00261,VITVI04G00414,VITVI04G01183,VITVI04G01319,VITVI04G00980,VITVI04G01037,VITVI06G00051,VITVI06G00346,VITVI06G00510,VITVI06G00700,VITVI06G00833,VITVI06G01847,VITVI06G04445,VITVI06G01553,VITVI07G00410,VITVI07G01797,VITVI07G01599,VITVI08G01357,VITVI08G01709,VITVI08…
GO:BP	response to heat	GO:0009408	1.99731e-09	8.69956	121	925	20	35134	VITVI07G00078,VITVI10G00217,VITVI07G01393,VITVI01G01311,VITVI04G00092,VITVI05G00561,VITVI08G01672,VITVI09G00045,VITVI09G00635,VITVI13G02014,VITVI13G02016,VITVI13G00405,VITVI13G00409,VITVI13G00410,VITVI13G00491,VITVI13G01770,VITVI17G00171,VITVI18G00338,VITVI19G02080,VITVI19G01359
GO:BP	nucleobase-containing compound metabolic process	GO:0006139	2.43085e-09	8.61424	5272	925	212	35134	VITVI07G00078,VITVI07G01405,VITVI00G04569,VITVI10G00387,VITVI04G01545,VITVI00G04706,VITVI10G04134,VITVI08G04000,VITVI01G01564,VITVI01G00132,VITVI01G00156,VITVI01G00245,VITVI01G00333,VITVI01G00355,VITVI01G04125,VITVI01G00800,VITVI01G02047,VITVI01G02053,VITVI01G01774,VITVI01G01815,VITVI02G01314,VITVI02G00341,VITVI02G00444,VITVI03G00995,VITVI03G00254,VITVI03G00331,VITVI03G00728,VITVI03G01600,VITVI03…
GO:BP	protein localization to organelle	GO:0033365	2.44317e-09	8.61205	260	925	29	35134	VITVI04G01526,VITVI01G01311,VITVI01G01620,VITVI01G04240,VITVI02G00274,VITVI02G00554,VITVI03G00848,VITVI04G01014,VITVI05G01356,VITVI06G00510,VITVI06G00700,VITVI09G00319,VITVI09G00876,VITVI11G00263,VITVI11G00279,VITVI11G04093,VITVI12G01897,VITVI12G00706,VITVI13G01222,VITVI14G00696,VITVI14G01545,VITVI14G01999,VITVI15G00613,VITVI15G00148,VITVI17G00728,VITVI18G00338,VITVI19G00043,VITVI19G01702,VITVI19…
GO:BP	intracellular protein transport	GO:0006886	3.11558e-09	8.50646	469	925	40	35134	VITVI04G01526,VITVI01G01311,VITVI01G01372,VITVI01G01620,VITVI01G04240,VITVI02G00274,VITVI02G00950,VITVI02G00554,VITVI03G00344,VITVI03G00848,VITVI04G01319,VITVI04G01014,VITVI04G01037,VITVI05G01356,VITVI06G00510,VITVI06G00669,VITVI06G00700,VITVI07G00464,VITVI08G00924,VITVI09G00319,VITVI09G00876,VITVI10G00619,VITVI11G00263,VITVI11G04093,VITVI12G01897,VITVI12G00706,VITVI13G00678,VITVI13G01222,VITVI13…
GO:BP	maturation of SSU-rRNA	GO:0030490	3.78981e-09	8.42138	46	925	13	35134	VITVI02G00341,VITVI05G01254,VITVI05G01593,VITVI06G04445,VITVI08G01588,VITVI08G01652,VITVI09G00015,VITVI11G00452,VITVI12G00264,VITVI15G01001,VITVI16G00096,VITVI18G00540,VITVI18G00099
GO:BP	protein-RNA complex organization	GO:0071826	4.43739e-09	8.35287	155	925	22	35134	VITVI10G00387,VITVI10G02255,VITVI01G00173,VITVI01G04125,VITVI01G00572,VITVI04G00640,VITVI04G00980,VITVI06G04445,VITVI08G01709,VITVI08G01796,VITVI08G01822,VITVI08G00039,VITVI09G00043,VITVI12G01799,VITVI13G01225,VITVI13G00718,VITVI14G00132,VITVI14G01385,VITVI14G01290,VITVI15G01262,VITVI18G01543,VITVI18G02360
GO:BP	ribosomal large subunit biogenesis	GO:0042273	6.7389e-09	8.17141	91	925	17	35134	VITVI01G00599,VITVI06G01406,VITVI07G01999,VITVI08G01709,VITVI08G00640,VITVI09G01927,VITVI09G00980,VITVI11G00452,VITVI12G00164,VITVI12G01799,VITVI13G00718,VITVI14G01703,VITVI14G01405,VITVI15G01001,VITVI17G00388,VITVI17G00910,VITVI18G01543
GO:BP	amino acid metabolic process	GO:0006520	7.46969e-09	8.1267	484	925	40	35134	VITVI07G01405,VITVI07G01247,VITVI07G04669,VITVI13G04616,VITVI08G04000,VITVI01G00800,VITVI01G01774,VITVI01G01758,VITVI03G00331,VITVI03G00728,VITVI04G00144,VITVI04G00265,VITVI04G00537,VITVI04G00597,VITVI05G01660,VITVI05G01692,VITVI05G01408,VITVI06G00346,VITVI07G00696,VITVI07G00047,VITVI08G01586,VITVI08G01672,VITVI08G01085,VITVI09G00719,VITVI09G00794,VITVI12G00071,VITVI12G00115,VITVI12G00283,VITVI12…
GO:BP	protein-RNA complex assembly	GO:0022618	1.83508e-08	7.73635	152	925	21	35134	VITVI10G00387,VITVI10G02255,VITVI01G00173,VITVI01G04125,VITVI01G00572,VITVI04G00640,VITVI04G00980,VITVI06G04445,VITVI08G01709,VITVI08G01796,VITVI08G01822,VITVI09G00043,VITVI12G01799,VITVI13G01225,VITVI13G00718,VITVI14G00132,VITVI14G01385,VITVI14G01290,VITVI15G01262,VITVI18G01543,VITVI18G02360
GO:BP	cytoplasmic translation	GO:0002181	2.77153e-08	7.55728	87	925	16	35134	VITVI02G01712,VITVI10G02255,VITVI01G00173,VITVI01G00572,VITVI04G00640,VITVI07G01838,VITVI08G01709,VITVI09G00043,VITVI11G00222,VITVI13G00526,VITVI13G00718,VITVI14G00132,VITVI14G01385,VITVI16G01711,VITVI16G01054,VITVI18G02360
GO:BP	'de novo' protein folding	GO:0006458	4.97479e-08	7.30322	46	925	12	35134	VITVI07G01393,VITVI02G00645,VITVI02G00187,VITVI06G00032,VITVI09G00635,VITVI10G00496,VITVI13G01770,VITVI15G00492,VITVI17G00171,VITVI17G00287,VITVI17G01403,VITVI19G00569
GO:BP	protein-containing complex assembly	GO:0065003	6.11122e-08	7.21387	500	925	39	35134	VITVI10G00387,VITVI10G02255,VITVI01G00173,VITVI01G04125,VITVI01G00572,VITVI03G00523,VITVI04G00640,VITVI04G00980,VITVI06G04445,VITVI08G01709,VITVI08G01796,VITVI08G01822,VITVI08G00113,VITVI09G00043,VITVI09G00045,VITVI09G00574,VITVI10G00049,VITVI11G00149,VITVI12G00184,VITVI12G01799,VITVI13G00361,VITVI13G02014,VITVI13G02016,VITVI13G00405,VITVI13G00409,VITVI13G00410,VITVI13G00491,VITVI13G01225,VITVI13…
GO:BP	response to abiotic stimulus	GO:0009628	1.42961e-07	6.84478	604	925	43	35134	VITVI07G00078,VITVI10G00217,VITVI07G01393,VITVI01G01311,VITVI01G02268,VITVI01G00681,VITVI01G01815,VITVI03G00452,VITVI03G00389,VITVI04G00092,VITVI04G01183,VITVI04G01014,VITVI05G00396,VITVI05G00561,VITVI05G01660,VITVI06G00991,VITVI07G01605,VITVI08G01672,VITVI08G00113,VITVI08G00146,VITVI09G00045,VITVI09G00224,VITVI09G00635,VITVI09G00876,VITVI12G00288,VITVI12G00685,VITVI12G00767,VITVI13G02014,VITVI13…
GO:BP	nucleic acid metabolic process	GO:0090304	1.53432e-07	6.81408	4928	925	193	35134	VITVI07G00078,VITVI07G01405,VITVI10G00387,VITVI04G01545,VITVI00G04706,VITVI10G04134,VITVI08G04000,VITVI01G01564,VITVI01G00156,VITVI01G00245,VITVI01G00355,VITVI01G04125,VITVI01G00800,VITVI01G02047,VITVI01G02053,VITVI01G01774,VITVI01G01815,VITVI02G01314,VITVI02G00341,VITVI02G00444,VITVI03G00331,VITVI03G00728,VITVI03G01600,VITVI03G00543,VITVI04G00092,VITVI04G00134,VITVI04G00152,VITVI04G00184,VITVI04…
GO:BP	maturation of SSU-rRNA from tricistronic rRNA transcript (SSU-rRNA, 5.8S rRNA, LSU-rRNA)	GO:0000462	1.53432e-07	6.81408	32	925	10	35134	VITVI05G01254,VITVI05G01593,VITVI06G04445,VITVI08G01652,VITVI09G00015,VITVI12G00264,VITVI15G01001,VITVI16G00096,VITVI18G00540,VITVI18G00099
GO:BP	protein transmembrane transport	GO:0071806	1.53432e-07	6.81408	85	925	15	35134	VITVI01G01311,VITVI02G00950,VITVI03G00848,VITVI04G01014,VITVI06G00510,VITVI06G00700,VITVI09G00319,VITVI09G00876,VITVI11G00263,VITVI12G00706,VITVI14G00696,VITVI15G00148,VITVI18G00338,VITVI19G01702,VITVI19G00567
GO:BP	nitrogen compound transport	GO:0071705	1.56157e-07	6.80644	1038	925	61	35134	VITVI07G04489,VITVI07G04463,VITVI04G01526,VITVI13G00233,VITVI01G01311,VITVI01G01372,VITVI01G01620,VITVI01G04240,VITVI01G00599,VITVI01G00613,VITVI02G00662,VITVI02G00111,VITVI02G00274,VITVI02G00950,VITVI02G00554,VITVI03G00344,VITVI03G00848,VITVI04G00125,VITVI04G01298,VITVI04G01319,VITVI04G01014,VITVI04G01037,VITVI05G01356,VITVI06G00510,VITVI06G00669,VITVI06G00700,VITVI07G00464,VITVI08G00924,VITVI09…
GO:BP	mRNA processing	GO:0006397	1.85181e-07	6.7324	375	925	32	35134	VITVI10G00387,VITVI01G00156,VITVI01G00355,VITVI01G04125,VITVI01G02047,VITVI01G02053,VITVI01G01815,VITVI04G00152,VITVI05G00147,VITVI05G00125,VITVI06G00073,VITVI06G00538,VITVI06G04198,VITVI06G00658,VITVI07G01877,VITVI08G01511,VITVI08G01822,VITVI08G00039,VITVI09G00137,VITVI11G00170,VITVI11G00452,VITVI11G00595,VITVI13G01134,VITVI13G00859,VITVI15G04675,VITVI14G01827,VITVI14G01896,VITVI15G01262,VITVI15…
GO:BP	protein refolding	GO:0042026	3.87806e-07	6.41139	35	925	10	35134	VITVI07G01393,VITVI02G00187,VITVI06G00032,VITVI06G01295,VITVI07G00394,VITVI09G00186,VITVI09G00635,VITVI13G01770,VITVI17G00171,VITVI17G00287
GO:BP	nucleocytoplasmic transport	GO:0006913	4.36807e-07	6.35971	150	925	19	35134	VITVI01G01620,VITVI01G04240,VITVI01G00599,VITVI01G00613,VITVI04G00125,VITVI04G01298,VITVI05G01356,VITVI09G00015,VITVI11G00363,VITVI11G04093,VITVI11G00440,VITVI12G01897,VITVI12G01613,VITVI14G00893,VITVI14G04569,VITVI15G00613,VITVI15G01001,VITVI16G00155,VITVI17G00728
GO:BP	protein targeting	GO:0006605	4.57519e-07	6.33959	183	925	21	35134	VITVI04G01526,VITVI01G01311,VITVI01G01372,VITVI02G00274,VITVI02G00554,VITVI03G00848,VITVI04G01014,VITVI06G00510,VITVI06G00700,VITVI08G00924,VITVI09G00319,VITVI09G00876,VITVI11G00263,VITVI12G00706,VITVI14G00696,VITVI14G01545,VITVI14G01999,VITVI15G00148,VITVI18G00338,VITVI19G01702,VITVI19G00567
GO:BP	nuclear transport	GO:0051169	4.70115e-07	6.3278	151	925	19	35134	VITVI01G01620,VITVI01G04240,VITVI01G00599,VITVI01G00613,VITVI04G00125,VITVI04G01298,VITVI05G01356,VITVI09G00015,VITVI11G00363,VITVI11G04093,VITVI11G00440,VITVI12G01897,VITVI12G01613,VITVI14G00893,VITVI14G04569,VITVI15G00613,VITVI15G01001,VITVI16G00155,VITVI17G00728
GO:BP	protein-containing complex organization	GO:0043933	4.70115e-07	6.3278	822	925	51	35134	VITVI10G00387,VITVI10G02255,VITVI01G01620,VITVI01G00173,VITVI01G04125,VITVI01G00572,VITVI03G00523,VITVI03G01600,VITVI04G00640,VITVI04G00980,VITVI06G00027,VITVI06G04445,VITVI08G01709,VITVI08G01729,VITVI08G01796,VITVI08G01822,VITVI08G00039,VITVI08G00113,VITVI09G00043,VITVI09G00045,VITVI09G00574,VITVI10G00049,VITVI11G00149,VITVI11G00174,VITVI12G00184,VITVI12G01799,VITVI13G00361,VITVI13G02014,VITVI13…
GO:BP	cellular nitrogen compound biosynthetic process	GO:0044271	5.99046e-07	6.22254	3408	925	142	35134	VITVI07G00078,VITVI07G02582,VITVI02G01712,VITVI07G02548,VITVI10G02255,VITVI08G04000,VITVI01G01564,VITVI01G00173,VITVI01G00245,VITVI01G00333,VITVI01G00572,VITVI01G00800,VITVI01G00971,VITVI01G01774,VITVI02G00194,VITVI02G00444,VITVI03G01190,VITVI03G01309,VITVI03G00995,VITVI03G00254,VITVI03G00331,VITVI03G00728,VITVI03G01600,VITVI03G00543,VITVI04G00064,VITVI04G00092,VITVI04G00265,VITVI04G00287,VITVI04…
GO:BP	organic substance transport	GO:0071702	6.3839e-07	6.19491	1345	925	71	35134	VITVI07G04489,VITVI07G04463,VITVI08G02419,VITVI04G01526,VITVI13G00233,VITVI10G00275,VITVI01G01311,VITVI01G01372,VITVI01G01620,VITVI01G00052,VITVI01G04240,VITVI01G00599,VITVI01G00613,VITVI02G00662,VITVI02G00111,VITVI02G00274,VITVI02G00320,VITVI02G00950,VITVI02G00554,VITVI03G00344,VITVI03G00848,VITVI04G00125,VITVI04G01298,VITVI04G01319,VITVI04G01014,VITVI04G01037,VITVI05G01356,VITVI06G00510,VITVI06…
GO:BP	small molecule biosynthetic process	GO:0044283	7.36355e-07	6.13291	574	925	40	35134	VITVI07G01247,VITVI07G04669,VITVI13G04616,VITVI01G01758,VITVI03G00452,VITVI04G01183,VITVI04G01193,VITVI05G01660,VITVI05G01692,VITVI05G01408,VITVI06G00158,VITVI06G00346,VITVI06G01739,VITVI06G00723,VITVI07G04151,VITVI07G00047,VITVI08G01586,VITVI08G01672,VITVI08G01676,VITVI08G01085,VITVI09G00719,VITVI09G00794,VITVI10G00753,VITVI10G01564,VITVI11G00056,VITVI12G04066,VITVI12G01806,VITVI12G00745,VITVI14…
GO:BP	intracellular protein transmembrane transport	GO:0065002	8.66541e-07	6.06221	71	925	13	35134	VITVI01G01311,VITVI03G00848,VITVI04G01014,VITVI06G00510,VITVI09G00319,VITVI09G00876,VITVI11G00263,VITVI12G00706,VITVI14G00696,VITVI15G00148,VITVI18G00338,VITVI19G01702,VITVI19G00567
GO:BP	maturation of LSU-rRNA	GO:0000470	1.09e-06	5.96257	39	925	10	35134	VITVI07G01999,VITVI08G00640,VITVI09G01927,VITVI09G00980,VITVI11G00452,VITVI12G00164,VITVI14G01703,VITVI14G01405,VITVI17G00388,VITVI17G00910
GO:BP	RNA modification	GO:0009451	1.62268e-06	5.78977	734	925	46	35134	VITVI07G01405,VITVI00G04706,VITVI10G04134,VITVI02G01314,VITVI04G00134,VITVI04G00184,VITVI04G00235,VITVI04G00447,VITVI06G00538,VITVI08G01813,VITVI09G00224,VITVI09G01387,VITVI09G04294,VITVI10G00490,VITVI10G01456,VITVI10G01318,VITVI11G01378,VITVI11G00413,VITVI12G02143,VITVI12G01620,VITVI12G00681,VITVI12G00714,VITVI13G01959,VITVI13G00286,VITVI13G01253,VITVI13G00859,VITVI14G01673,VITVI14G01477,VITVI14…
GO:BP	'de novo' post-translational protein folding	GO:0051084	2.26777e-06	5.6444	42	925	10	35134	VITVI07G01393,VITVI02G00187,VITVI06G00032,VITVI09G00635,VITVI10G00496,VITVI13G01770,VITVI15G00492,VITVI17G00171,VITVI17G00287,VITVI17G01403
GO:BP	chaperone cofactor-dependent protein refolding	GO:0051085	2.26777e-06	5.6444	42	925	10	35134	VITVI07G01393,VITVI02G00187,VITVI06G00032,VITVI09G00635,VITVI10G00496,VITVI13G01770,VITVI15G00492,VITVI17G00171,VITVI17G00287,VITVI17G01403
GO:BP	cellular component assembly	GO:0022607	2.66235e-06	5.57473	699	925	44	35134	VITVI08G02419,VITVI10G00387,VITVI10G02255,VITVI01G00173,VITVI01G04125,VITVI01G00572,VITVI03G00523,VITVI04G00640,VITVI04G00980,VITVI06G04445,VITVI08G01464,VITVI08G01709,VITVI08G01796,VITVI08G01822,VITVI08G00113,VITVI09G00043,VITVI09G00045,VITVI09G00574,VITVI10G00049,VITVI11G00149,VITVI12G00184,VITVI12G01799,VITVI13G00361,VITVI13G02014,VITVI13G02016,VITVI13G00405,VITVI13G00409,VITVI13G00410,VITVI13…
GO:BP	alpha-amino acid biosynthetic process	GO:1901607	3.42136e-06	5.4658	172	925	19	35134	VITVI07G01247,VITVI07G04669,VITVI01G01758,VITVI05G01660,VITVI05G01692,VITVI05G01408,VITVI06G00346,VITVI07G00047,VITVI08G01586,VITVI08G01672,VITVI08G01085,VITVI09G00719,VITVI09G00794,VITVI12G04066,VITVI12G01806,VITVI12G00745,VITVI17G00138,VITVI17G00910,VITVI18G02321
GO:BP	mitochondrion organization	GO:0007005	4.06078e-06	5.39139	157	925	18	35134	VITVI02G00274,VITVI03G00848,VITVI06G00510,VITVI06G00700,VITVI07G01797,VITVI09G00137,VITVI09G00574,VITVI11G00263,VITVI12G00706,VITVI14G00096,VITVI14G01545,VITVI14G00251,VITVI14G02991,VITVI15G00862,VITVI18G00338,VITVI19G01702,VITVI19G01725,VITVI19G00567
GO:BP	alpha-amino acid metabolic process	GO:1901605	4.41091e-06	5.35547	287	925	25	35134	VITVI07G01405,VITVI07G01247,VITVI07G04669,VITVI01G01758,VITVI04G00144,VITVI04G00597,VITVI05G01660,VITVI05G01692,VITVI05G01408,VITVI06G00346,VITVI07G00696,VITVI07G00047,VITVI08G01586,VITVI08G01672,VITVI08G01085,VITVI09G00719,VITVI09G00794,VITVI12G00071,VITVI12G04066,VITVI12G01806,VITVI12G00745,VITVI17G00138,VITVI17G00910,VITVI18G02321,VITVI19G01681
GO:BP	maturation of 5.8S rRNA	GO:0000460	4.57998e-06	5.33914	35	925	9	35134	VITVI07G01999,VITVI07G00195,VITVI08G00640,VITVI09G00015,VITVI12G00367,VITVI14G01703,VITVI14G01405,VITVI15G01001,VITVI17G00910
GO:BP	organic acid biosynthetic process	GO:0016053	4.81329e-06	5.31756	436	925	32	35134	VITVI07G01247,VITVI07G04669,VITVI13G04616,VITVI01G01758,VITVI03G00452,VITVI04G01193,VITVI05G01660,VITVI05G01692,VITVI05G01408,VITVI06G00158,VITVI06G00346,VITVI06G00723,VITVI07G00047,VITVI08G01586,VITVI08G01672,VITVI08G01676,VITVI08G01085,VITVI09G00719,VITVI09G00794,VITVI10G00753,VITVI10G01564,VITVI12G04066,VITVI12G01806,VITVI12G00745,VITVI14G02043,VITVI15G00764,VITVI16G00895,VITVI17G00138,VITVI17…
GO:BP	carboxylic acid biosynthetic process	GO:0046394	4.81329e-06	5.31756	436	925	32	35134	VITVI07G01247,VITVI07G04669,VITVI13G04616,VITVI01G01758,VITVI03G00452,VITVI04G01193,VITVI05G01660,VITVI05G01692,VITVI05G01408,VITVI06G00158,VITVI06G00346,VITVI06G00723,VITVI07G00047,VITVI08G01586,VITVI08G01672,VITVI08G01676,VITVI08G01085,VITVI09G00719,VITVI09G00794,VITVI10G00753,VITVI10G01564,VITVI12G04066,VITVI12G01806,VITVI12G00745,VITVI14G02043,VITVI15G00764,VITVI16G00895,VITVI17G00138,VITVI17…
GO:BP	chaperone-mediated protein folding	GO:0061077	4.81914e-06	5.31703	57	925	11	35134	VITVI07G01393,VITVI02G00187,VITVI06G00032,VITVI09G00635,VITVI10G00496,VITVI13G01770,VITVI15G00492,VITVI17G00171,VITVI17G00287,VITVI17G01403,VITVI19G00569
GO:BP	response to salt stress	GO:0009651	4.93057e-06	5.3071	127	925	16	35134	VITVI01G01311,VITVI03G00452,VITVI06G00991,VITVI08G01672,VITVI08G00113,VITVI08G00146,VITVI09G00045,VITVI12G00685,VITVI13G02014,VITVI13G02016,VITVI13G00405,VITVI13G00409,VITVI13G00410,VITVI13G00491,VITVI13G00049,VITVI19G01359
GO:BP	response to inorganic substance	GO:0010035	8.55899e-06	5.06758	220	925	21	35134	VITVI01G01311,VITVI01G02268,VITVI02G00444,VITVI03G00452,VITVI03G00389,VITVI07G01705,VITVI08G01729,VITVI08G00113,VITVI08G00146,VITVI09G00045,VITVI10G01476,VITVI12G00685,VITVI13G02014,VITVI13G02016,VITVI13G00405,VITVI13G00409,VITVI13G00410,VITVI13G00491,VITVI16G00280,VITVI16G00895,VITVI18G01553
GO:BP	amino acid biosynthetic process	GO:0008652	1.03567e-05	4.98478	204	925	20	35134	VITVI07G01247,VITVI07G04669,VITVI13G04616,VITVI01G01758,VITVI05G01660,VITVI05G01692,VITVI05G01408,VITVI06G00346,VITVI07G00047,VITVI08G01586,VITVI08G01672,VITVI08G01085,VITVI09G00719,VITVI09G00794,VITVI12G04066,VITVI12G01806,VITVI12G00745,VITVI17G00138,VITVI17G00910,VITVI18G02321
GO:BP	RNA splicing	GO:0008380	1.59119e-05	4.79828	268	925	23	35134	VITVI10G00387,VITVI01G04125,VITVI01G02047,VITVI01G02053,VITVI01G01815,VITVI05G00147,VITVI06G00073,VITVI06G04198,VITVI06G00658,VITVI08G01822,VITVI08G00039,VITVI09G00137,VITVI09G00574,VITVI11G00170,VITVI11G00452,VITVI11G00595,VITVI12G00003,VITVI14G01827,VITVI14G01896,VITVI15G01262,VITVI17G00728,VITVI18G00151,VITVI18G00035
GO:BP	protein targeting to mitochondrion	GO:0006626	3.42155e-05	4.46578	44	925	9	35134	VITVI02G00274,VITVI03G00848,VITVI06G00510,VITVI06G00700,VITVI11G00263,VITVI12G00706,VITVI14G01545,VITVI18G00338,VITVI19G00567
GO:BP	nuclear export	GO:0051168	3.83282e-05	4.41648	84	925	12	35134	VITVI01G00599,VITVI01G00613,VITVI04G01298,VITVI09G00015,VITVI11G04093,VITVI11G00440,VITVI12G01613,VITVI14G00893,VITVI14G04569,VITVI15G00613,VITVI15G01001,VITVI16G00155
GO:BP	RNA splicing, via transesterification reactions	GO:0000375	3.98616e-05	4.39944	223	925	20	35134	VITVI10G00387,VITVI01G04125,VITVI01G02047,VITVI01G02053,VITVI01G01815,VITVI05G00147,VITVI06G00073,VITVI06G04198,VITVI06G00658,VITVI08G01822,VITVI08G00039,VITVI09G00137,VITVI11G00170,VITVI11G00452,VITVI11G00595,VITVI12G00003,VITVI14G01827,VITVI15G01262,VITVI18G00151,VITVI18G00035
GO:BP	RNA splicing, via transesterification reactions with bulged adenosine as nucleophile	GO:0000377	3.98616e-05	4.39944	223	925	20	35134	VITVI10G00387,VITVI01G04125,VITVI01G02047,VITVI01G02053,VITVI01G01815,VITVI05G00147,VITVI06G00073,VITVI06G04198,VITVI06G00658,VITVI08G01822,VITVI08G00039,VITVI09G00137,VITVI11G00170,VITVI11G00452,VITVI11G00595,VITVI12G00003,VITVI14G01827,VITVI15G01262,VITVI18G00151,VITVI18G00035
GO:BP	establishment of protein localization to mitochondrion	GO:0072655	4.83107e-05	4.31596	46	925	9	35134	VITVI02G00274,VITVI03G00848,VITVI06G00510,VITVI06G00700,VITVI11G00263,VITVI12G00706,VITVI14G01545,VITVI18G00338,VITVI19G00567
GO:BP	protein localization to mitochondrion	GO:0070585	4.83107e-05	4.31596	46	925	9	35134	VITVI02G00274,VITVI03G00848,VITVI06G00510,VITVI06G00700,VITVI11G00263,VITVI12G00706,VITVI14G01545,VITVI18G00338,VITVI19G00567
GO:BP	response to osmotic stress	GO:0006970	5.08449e-05	4.29375	152	925	16	35134	VITVI01G01311,VITVI03G00452,VITVI06G00991,VITVI08G01672,VITVI08G00113,VITVI08G00146,VITVI09G00045,VITVI12G00685,VITVI13G02014,VITVI13G02016,VITVI13G00405,VITVI13G00409,VITVI13G00410,VITVI13G00491,VITVI13G00049,VITVI19G01359
GO:BP	tRNA processing	GO:0008033	6.86487e-05	4.16337	138	925	15	35134	VITVI04G00235,VITVI09G00224,VITVI11G00316,VITVI12G01620,VITVI12G00465,VITVI13G01959,VITVI13G00286,VITVI14G01673,VITVI14G01896,VITVI15G00692,VITVI18G02183,VITVI18G00960,VITVI18G01807,VITVI19G00137,VITVI19G00551
GO:BP	tRNA aminoacylation	GO:0043039	7.74901e-05	4.11075	106	925	13	35134	VITVI08G04000,VITVI01G00800,VITVI01G01774,VITVI03G00331,VITVI03G00728,VITVI04G00265,VITVI12G00115,VITVI12G00283,VITVI15G00533,VITVI15G00050,VITVI16G00938,VITVI17G00022,VITVI18G02323
GO:BP	amino acid activation	GO:0043038	7.74901e-05	4.11075	106	925	13	35134	VITVI08G04000,VITVI01G00800,VITVI01G01774,VITVI03G00331,VITVI03G00728,VITVI04G00265,VITVI12G00115,VITVI12G00283,VITVI15G00533,VITVI15G00050,VITVI16G00938,VITVI17G00022,VITVI18G02323
GO:BP	transport	GO:0006810	0.00010012	3.99948	2703	925	109	35134	VITVI10G01219,VITVI07G04489,VITVI07G04463,VITVI08G02419,VITVI04G01526,VITVI13G00233,VITVI10G00275,VITVI01G01311,VITVI01G01372,VITVI01G01620,VITVI01G00052,VITVI01G04240,VITVI01G00599,VITVI01G00613,VITVI02G00662,VITVI02G00111,VITVI02G00221,VITVI02G00274,VITVI02G00320,VITVI02G00950,VITVI02G00554,VITVI03G00452,VITVI03G00344,VITVI03G00848,VITVI04G00125,VITVI04G01813,VITVI04G00441,VITVI04G01298,VITVI04…
GO:BP	localization	GO:0051179	0.000114722	3.94035	2837	925	113	35134	VITVI10G01219,VITVI07G04489,VITVI07G04463,VITVI08G02419,VITVI04G01526,VITVI13G00233,VITVI10G00275,VITVI01G01311,VITVI01G01372,VITVI01G01620,VITVI01G00052,VITVI01G04240,VITVI01G00599,VITVI01G00613,VITVI02G00662,VITVI02G00111,VITVI02G00221,VITVI02G00274,VITVI02G00320,VITVI02G00950,VITVI02G00554,VITVI03G00452,VITVI03G00344,VITVI03G00848,VITVI04G00125,VITVI04G01813,VITVI04G00441,VITVI04G01298,VITVI04…
GO:BP	mitochondrial transport	GO:0006839	0.000131334	3.88162	52	925	9	35134	VITVI02G00274,VITVI03G00848,VITVI06G00510,VITVI06G00700,VITVI11G00263,VITVI12G00706,VITVI14G01545,VITVI18G00338,VITVI19G00567
GO:BP	establishment of localization	GO:0051234	0.000155205	3.8091	2732	925	109	35134	VITVI10G01219,VITVI07G04489,VITVI07G04463,VITVI08G02419,VITVI04G01526,VITVI13G00233,VITVI10G00275,VITVI01G01311,VITVI01G01372,VITVI01G01620,VITVI01G00052,VITVI01G04240,VITVI01G00599,VITVI01G00613,VITVI02G00662,VITVI02G00111,VITVI02G00221,VITVI02G00274,VITVI02G00320,VITVI02G00950,VITVI02G00554,VITVI03G00452,VITVI03G00344,VITVI03G00848,VITVI04G00125,VITVI04G01813,VITVI04G00441,VITVI04G01298,VITVI04…
GO:BP	mRNA modification	GO:0016556	0.0001702	3.76904	30	925	7	35134	VITVI13G01253,VITVI13G00859,VITVI14G01673,VITVI17G01512,VITVI18G00920,VITVI19G00129,VITVI19G00376
GO:BP	protein import into chloroplast stroma	GO:0045037	0.000221757	3.65412	13	925	5	35134	VITVI01G01311,VITVI06G00510,VITVI09G00319,VITVI15G00148,VITVI19G01702
GO:BP	tRNA aminoacylation for protein translation	GO:0006418	0.000234068	3.63066	101	925	12	35134	VITVI08G04000,VITVI01G00800,VITVI01G01774,VITVI03G00331,VITVI03G00728,VITVI04G00265,VITVI12G00283,VITVI15G00533,VITVI15G00050,VITVI16G00938,VITVI17G00022,VITVI18G02323
GO:BP	cellular response to stress	GO:0033554	0.000265011	3.57674	737	925	40	35134	VITVI07G00078,VITVI10G00217,VITVI17G01311,VITVI01G01311,VITVI01G01023,VITVI02G00729,VITVI02G00111,VITVI02G00187,VITVI02G00444,VITVI03G00389,VITVI04G00039,VITVI04G00092,VITVI04G01014,VITVI05G00396,VITVI05G00561,VITVI05G01545,VITVI06G00991,VITVI07G00574,VITVI07G00733,VITVI07G01797,VITVI08G00146,VITVI08G00752,VITVI09G00876,VITVI10G00908,VITVI10G01476,VITVI11G01370,VITVI12G00685,VITVI12G00453,VITVI13…
GO:BP	mitochondrial RNA metabolic process	GO:0000959	0.000271798	3.56575	44	925	8	35134	VITVI01G01774,VITVI09G00574,VITVI13G00859,VITVI14G01730,VITVI17G00022,VITVI17G01512,VITVI19G00129,VITVI19G00376
GO:BP	mitochondrial membrane organization	GO:0007006	0.000271798	3.56575	22	925	6	35134	VITVI02G00274,VITVI06G00510,VITVI06G00700,VITVI07G01797,VITVI14G01545,VITVI19G01702
GO:BP	cytoplasmic translational initiation	GO:0002183	0.000316747	3.49929	33	925	7	35134	VITVI10G02255,VITVI01G00173,VITVI01G00572,VITVI04G00640,VITVI14G00132,VITVI14G01385,VITVI18G02360
GO:BP	protein stabilization	GO:0050821	0.000348767	3.45746	23	925	6	35134	VITVI10G00217,VITVI01G01311,VITVI14G00073,VITVI16G01136,VITVI17G01034,VITVI19G02080
GO:BP	maturation of 5.8S rRNA from tricistronic rRNA transcript (SSU-rRNA, 5.8S rRNA, LSU-rRNA)	GO:0000466	0.000348767	3.45746	23	925	6	35134	VITVI07G00195,VITVI09G00015,VITVI12G00367,VITVI14G01703,VITVI14G01405,VITVI15G01001
GO:BP	translational initiation	GO:0006413	0.000383649	3.41607	124	925	13	35134	VITVI07G02582,VITVI10G02255,VITVI01G00173,VITVI01G00572,VITVI04G00640,VITVI05G00818,VITVI06G00696,VITVI06G01501,VITVI13G00101,VITVI14G00132,VITVI14G01385,VITVI18G02360,VITVI19G00498
GO:BP	nucleotide biosynthetic process	GO:0009165	0.00042921	3.36733	182	925	16	35134	VITVI01G01564,VITVI01G00333,VITVI03G00995,VITVI03G00254,VITVI04G02037,VITVI04G01645,VITVI05G00412,VITVI08G01874,VITVI09G01301,VITVI13G01485,VITVI15G00445,VITVI17G00130,VITVI17G01038,VITVI18G01542,VITVI18G00486,VITVI19G01974
GO:BP	RNA 3'-end processing	GO:0031123	0.000456809	3.34026	76	925	10	35134	VITVI01G00355,VITVI07G00195,VITVI08G01511,VITVI12G00367,VITVI12G00465,VITVI14G01730,VITVI14G01896,VITVI15G01169,VITVI16G01083,VITVI18G01807
GO:BP	response to reactive oxygen species	GO:0000302	0.000620453	3.20729	95	925	11	35134	VITVI02G00444,VITVI09G00045,VITVI10G01476,VITVI13G02014,VITVI13G02016,VITVI13G00405,VITVI13G00409,VITVI13G00410,VITVI13G00491,VITVI16G00280,VITVI18G01553
GO:BP	ribosome assembly	GO:0042255	0.000654195	3.18429	64	925	9	35134	VITVI04G00980,VITVI06G04445,VITVI08G01709,VITVI08G01796,VITVI09G00043,VITVI12G01799,VITVI13G00718,VITVI14G01290,VITVI18G01543
GO:BP	nucleoside phosphate biosynthetic process	GO:1901293	0.000658341	3.18155	189	925	16	35134	VITVI01G01564,VITVI01G00333,VITVI03G00995,VITVI03G00254,VITVI04G02037,VITVI04G01645,VITVI05G00412,VITVI08G01874,VITVI09G01301,VITVI13G01485,VITVI15G00445,VITVI17G00130,VITVI17G01038,VITVI18G01542,VITVI18G00486,VITVI19G01974
GO:BP	nucleotide metabolic process	GO:0009117	0.000769514	3.11378	277	925	20	35134	VITVI00G04569,VITVI01G01564,VITVI01G00132,VITVI01G00333,VITVI03G00995,VITVI03G00254,VITVI04G01183,VITVI04G02037,VITVI04G01645,VITVI04G00860,VITVI05G00412,VITVI08G01874,VITVI09G01301,VITVI13G01485,VITVI15G00445,VITVI17G00130,VITVI17G01038,VITVI18G01542,VITVI18G00486,VITVI19G01974
GO:BP	mitochondrial gene expression	GO:0140053	0.000870753	3.06011	52	925	8	35134	VITVI07G02548,VITVI01G01774,VITVI07G00186,VITVI09G00574,VITVI12G00115,VITVI13G00354,VITVI14G01730,VITVI17G00022
GO:BP	regulation of protein stability	GO:0031647	0.000870753	3.06011	27	925	6	35134	VITVI10G00217,VITVI01G01311,VITVI14G00073,VITVI16G01136,VITVI17G01034,VITVI19G02080
GO:BP	response to hydrogen peroxide	GO:0042542	0.000994475	3.00241	53	925	8	35134	VITVI09G00045,VITVI13G02014,VITVI13G02016,VITVI13G00405,VITVI13G00409,VITVI13G00410,VITVI13G00491,VITVI18G01553
GO:BP	protein localization to nucleus	GO:0034504	0.00113212	2.94611	54	925	8	35134	VITVI01G01620,VITVI01G04240,VITVI05G01356,VITVI11G00279,VITVI11G04093,VITVI12G01897,VITVI15G00613,VITVI17G00728
GO:BP	mRNA splicing, via spliceosome	GO:0000398	0.00116405	2.93403	199	925	16	35134	VITVI10G00387,VITVI01G04125,VITVI01G01815,VITVI05G00147,VITVI06G00073,VITVI06G04198,VITVI06G00658,VITVI08G01822,VITVI08G00039,VITVI09G00137,VITVI11G00170,VITVI11G00452,VITVI11G00595,VITVI15G01262,VITVI18G00151,VITVI18G00035
GO:BP	endonucleolytic cleavage of tricistronic rRNA transcript (SSU-rRNA, 5.8S rRNA, LSU-rRNA)	GO:0000479	0.00123505	2.90831	10	925	4	35134	VITVI09G00015,VITVI15G01001,VITVI16G00096,VITVI18G00099
GO:BP	protein targeting to chloroplast	GO:0045036	0.00127717	2.89375	29	925	6	35134	VITVI04G01526,VITVI01G01311,VITVI06G00510,VITVI09G00319,VITVI15G00148,VITVI19G01702
GO:BP	establishment of protein localization to chloroplast	GO:0072596	0.00127717	2.89375	29	925	6	35134	VITVI04G01526,VITVI01G01311,VITVI06G00510,VITVI09G00319,VITVI15G00148,VITVI19G01702
GO:BP	ribosome localization	GO:0033750	0.00145335	2.83763	19	925	5	35134	VITVI01G00599,VITVI09G00015,VITVI11G04093,VITVI15G01001,VITVI16G00155
GO:BP	ribosomal subunit export from nucleus	GO:0000054	0.00145335	2.83763	19	925	5	35134	VITVI01G00599,VITVI09G00015,VITVI11G04093,VITVI15G01001,VITVI16G00155
GO:BP	nucleoside phosphate metabolic process	GO:0006753	0.00153181	2.81479	293	925	20	35134	VITVI00G04569,VITVI01G01564,VITVI01G00132,VITVI01G00333,VITVI03G00995,VITVI03G00254,VITVI04G01183,VITVI04G02037,VITVI04G01645,VITVI04G00860,VITVI05G00412,VITVI08G01874,VITVI09G01301,VITVI13G01485,VITVI15G00445,VITVI17G00130,VITVI17G01038,VITVI18G01542,VITVI18G00486,VITVI19G01974
GO:BP	anatomical structure development	GO:0048856	0.0017965	2.74557	1037	925	48	35134	VITVI08G02419,VITVI01G01311,VITVI01G02268,VITVI02G00645,VITVI02G00221,VITVI02G00341,VITVI02G00433,VITVI03G00452,VITVI04G01689,VITVI05G00060,VITVI06G00833,VITVI06G01399,VITVI06G01491,VITVI07G00309,VITVI07G00410,VITVI07G00226,VITVI07G01605,VITVI07G00088,VITVI08G01652,VITVI08G00904,VITVI09G01487,VITVI10G00605,VITVI11G00350,VITVI11G00585,VITVI12G00283,VITVI12G00685,VITVI12G00767,VITVI13G01959,VITVI13…
GO:BP	mitochondrial translation	GO:0032543	0.00182615	2.73846	31	925	6	35134	VITVI07G02548,VITVI01G01774,VITVI07G00186,VITVI12G00115,VITVI13G00354,VITVI17G00022
GO:BP	seedling development	GO:0090351	0.00185408	2.73187	44	925	7	35134	VITVI07G00309,VITVI07G01605,VITVI12G00685,VITVI13G01222,VITVI13G01416,VITVI18G01542,VITVI19G01359
GO:BP	protein localization to chloroplast	GO:0072598	0.00216724	2.66409	32	925	6	35134	VITVI04G01526,VITVI01G01311,VITVI06G00510,VITVI09G00319,VITVI15G00148,VITVI19G01702
GO:BP	formation of cytoplasmic translation initiation complex	GO:0001732	0.00231783	2.63492	21	925	5	35134	VITVI10G02255,VITVI01G00572,VITVI04G00640,VITVI14G00132,VITVI14G01385
GO:BP	multicellular organism development	GO:0007275	0.00231783	2.63492	851	925	41	35134	VITVI08G02419,VITVI01G01311,VITVI01G02268,VITVI02G00645,VITVI02G00221,VITVI02G00341,VITVI03G00452,VITVI05G00060,VITVI06G00833,VITVI06G01399,VITVI06G01491,VITVI07G00309,VITVI07G00226,VITVI07G01605,VITVI07G00088,VITVI08G01652,VITVI09G01487,VITVI10G00605,VITVI11G00350,VITVI11G00585,VITVI12G00283,VITVI12G00685,VITVI12G00767,VITVI13G01959,VITVI13G01222,VITVI13G01702,VITVI13G01892,VITVI13G01416,VITVI15…
GO:BP	lysine biosynthetic process via diaminopimelate	GO:0009089	0.00254589	2.59416	12	925	4	35134	VITVI01G01758,VITVI05G01692,VITVI08G01085,VITVI18G02321
GO:BP	diaminopimelate metabolic process	GO:0046451	0.00254589	2.59416	12	925	4	35134	VITVI01G01758,VITVI05G01692,VITVI08G01085,VITVI18G02321
GO:BP	nucleobase-containing small molecule metabolic process	GO:0055086	0.00302634	2.51908	358	925	22	35134	VITVI07G01405,VITVI00G04569,VITVI01G01564,VITVI01G00132,VITVI01G00333,VITVI03G00995,VITVI03G00254,VITVI04G01183,VITVI04G02037,VITVI04G01645,VITVI04G00860,VITVI05G00412,VITVI08G01874,VITVI09G01301,VITVI10G00713,VITVI13G01485,VITVI15G00445,VITVI17G00130,VITVI17G01038,VITVI18G01542,VITVI18G00486,VITVI19G01974
GO:BP	tRNA modification	GO:0006400	0.0030563	2.5148	97	925	10	35134	VITVI04G00235,VITVI09G00224,VITVI12G01620,VITVI13G01959,VITVI13G00286,VITVI14G01673,VITVI15G00692,VITVI18G02183,VITVI19G00137,VITVI19G00551
GO:BP	chloroplast organization	GO:0009658	0.00341239	2.46694	117	925	11	35134	VITVI01G01457,VITVI04G01183,VITVI06G00346,VITVI06G00510,VITVI06G01553,VITVI08G00113,VITVI10G01068,VITVI12G00184,VITVI15G00148,VITVI18G00655,VITVI18G00785
GO:BP	inner mitochondrial membrane organization	GO:0007007	0.00350606	2.45518	13	925	4	35134	VITVI02G00274,VITVI06G00700,VITVI07G01797,VITVI19G01702
GO:BP	multicellular organismal process	GO:0032501	0.00355749	2.44886	928	925	43	35134	VITVI08G02419,VITVI01G01311,VITVI01G02268,VITVI02G00645,VITVI02G00221,VITVI02G00341,VITVI03G00452,VITVI05G00060,VITVI06G00833,VITVI06G01399,VITVI06G01491,VITVI07G00309,VITVI07G00226,VITVI07G01605,VITVI07G00088,VITVI08G01652,VITVI08G00904,VITVI09G01487,VITVI10G00605,VITVI11G00350,VITVI11G00585,VITVI12G00283,VITVI12G00685,VITVI12G00767,VITVI13G01959,VITVI13G01222,VITVI13G01702,VITVI13G01892,VITVI13…
GO:BP	protein localization to membrane	GO:0072657	0.00416913	2.37995	120	925	11	35134	VITVI01G01372,VITVI01G01620,VITVI02G00274,VITVI02G00554,VITVI04G01014,VITVI06G00510,VITVI06G00700,VITVI08G00924,VITVI09G00876,VITVI12G01578,VITVI14G01545
GO:BP	maturation of LSU-rRNA from tricistronic rRNA transcript (SSU-rRNA, 5.8S rRNA, LSU-rRNA)	GO:0000463	0.00427126	2.36944	24	925	5	35134	VITVI09G01927,VITVI09G00980,VITVI14G01703,VITVI14G01405,VITVI17G00388
GO:BP	protein import into nucleus	GO:0006606	0.00437798	2.35873	51	925	7	35134	VITVI01G01620,VITVI01G04240,VITVI05G01356,VITVI11G04093,VITVI12G01897,VITVI15G00613,VITVI17G00728
GO:BP	mitochondrial transmembrane transport	GO:1990542	0.00455993	2.34104	37	925	6	35134	VITVI03G00848,VITVI11G00263,VITVI12G00706,VITVI16G01197,VITVI18G00338,VITVI19G00567
GO:BP	protein insertion into mitochondrial membrane	GO:0051204	0.00462383	2.335	14	925	4	35134	VITVI02G00274,VITVI06G00510,VITVI06G00700,VITVI14G01545
GO:BP	protein import into mitochondrial matrix	GO:0030150	0.00502928	2.29849	25	925	5	35134	VITVI03G00848,VITVI11G00263,VITVI12G00706,VITVI18G00338,VITVI19G00567
GO:BP	protein-containing complex localization	GO:0031503	0.00502928	2.29849	25	925	5	35134	VITVI01G00599,VITVI09G00015,VITVI11G04093,VITVI15G01001,VITVI16G00155
GO:BP	ribosomal small subunit assembly	GO:0000028	0.00502928	2.29849	25	925	5	35134	VITVI04G00980,VITVI06G04445,VITVI08G01796,VITVI09G00043,VITVI14G01290
GO:BP	cellular response to heat	GO:0034605	0.00513188	2.28972	38	925	6	35134	VITVI07G00078,VITVI10G00217,VITVI01G01311,VITVI04G00092,VITVI05G00561,VITVI19G02080
GO:BP	ribose phosphate biosynthetic process	GO:0046390	0.00515507	2.28777	144	925	12	35134	VITVI03G00254,VITVI04G02037,VITVI04G01645,VITVI08G01874,VITVI09G01301,VITVI13G01485,VITVI15G00445,VITVI17G00130,VITVI17G01038,VITVI18G01542,VITVI18G00486,VITVI19G01974
GO:BP	establishment of RNA localization	GO:0051236	0.00515507	2.28777	69	925	8	35134	VITVI01G00613,VITVI04G00125,VITVI04G01298,VITVI11G00440,VITVI12G01613,VITVI14G00893,VITVI14G04569,VITVI15G00613
GO:BP	nucleic acid transport	GO:0050657	0.00515507	2.28777	69	925	8	35134	VITVI01G00613,VITVI04G00125,VITVI04G01298,VITVI11G00440,VITVI12G01613,VITVI14G00893,VITVI14G04569,VITVI15G00613
GO:BP	RNA transport	GO:0050658	0.00515507	2.28777	69	925	8	35134	VITVI01G00613,VITVI04G00125,VITVI04G01298,VITVI11G00440,VITVI12G01613,VITVI14G00893,VITVI14G04569,VITVI15G00613
GO:BP	import into nucleus	GO:0051170	0.00520288	2.28376	53	925	7	35134	VITVI01G01620,VITVI01G04240,VITVI05G01356,VITVI11G04093,VITVI12G01897,VITVI15G00613,VITVI17G00728
GO:BP	lysine biosynthetic process	GO:0009085	0.0057068	2.24361	15	925	4	35134	VITVI01G01758,VITVI05G01692,VITVI08G01085,VITVI18G02321
GO:BP	RNA export from nucleus	GO:0006405	0.0057068	2.24361	54	925	7	35134	VITVI01G00613,VITVI04G01298,VITVI11G00440,VITVI12G01613,VITVI14G00893,VITVI14G04569,VITVI15G00613
GO:BP	regulation of translation	GO:0006417	0.0057068	2.24361	126	925	11	35134	VITVI07G02582,VITVI01G00971,VITVI05G00818,VITVI05G00060,VITVI06G01524,VITVI07G00923,VITVI07G00195,VITVI09G00015,VITVI09G00969,VITVI12G02034,VITVI13G00354
GO:BP	megagametogenesis	GO:0009561	0.0057068	2.24361	15	925	4	35134	VITVI06G01491,VITVI07G00226,VITVI08G01652,VITVI19G01704
GO:BP	plastid organization	GO:0009657	0.00591774	2.22784	147	925	12	35134	VITVI01G01457,VITVI04G01183,VITVI06G00346,VITVI06G00510,VITVI06G01553,VITVI08G00113,VITVI10G01068,VITVI12G00184,VITVI15G00148,VITVI18G00655,VITVI18G00785,VITVI19G00207
GO:BP	regulation of amide metabolic process	GO:0034248	0.00602717	2.21989	127	925	11	35134	VITVI07G02582,VITVI01G00971,VITVI05G00818,VITVI05G00060,VITVI06G01524,VITVI07G00923,VITVI07G00195,VITVI09G00015,VITVI09G00969,VITVI12G02034,VITVI13G00354
GO:BP	dicarboxylic acid metabolic process	GO:0043648	0.00612016	2.21324	89	925	9	35134	VITVI13G04616,VITVI01G01758,VITVI04G00144,VITVI05G01692,VITVI07G00362,VITVI08G01085,VITVI14G01964,VITVI17G00607,VITVI18G02321
GO:BP	organophosphate metabolic process	GO:0019637	0.00612016	2.21324	565	925	29	35134	VITVI00G04569,VITVI01G01564,VITVI01G00132,VITVI01G00333,VITVI03G00995,VITVI03G00254,VITVI04G01183,VITVI04G02037,VITVI04G01645,VITVI04G00860,VITVI05G00412,VITVI05G00054,VITVI05G01683,VITVI06G00497,VITVI07G01033,VITVI08G01874,VITVI09G01301,VITVI10G00129,VITVI12G02141,VITVI12G01578,VITVI13G01485,VITVI14G00172,VITVI15G00445,VITVI17G00130,VITVI17G01038,VITVI18G01542,VITVI18G00486,VITVI19G01974,VITVI19…
GO:BP	regulation of biological quality	GO:0065008	0.00686057	2.16364	360	925	21	35134	VITVI10G00217,VITVI01G01311,VITVI01G00971,VITVI01G01023,VITVI02G00645,VITVI04G01689,VITVI06G01524,VITVI07G00410,VITVI07G01797,VITVI07G00195,VITVI09G01487,VITVI09G00969,VITVI12G02034,VITVI12G00767,VITVI14G00073,VITVI16G01136,VITVI16G00938,VITVI17G01034,VITVI19G00137,VITVI19G02080,VITVI19G01359
GO:BP	protein complex oligomerization	GO:0051259	0.00686057	2.16364	56	925	7	35134	VITVI09G00045,VITVI13G02014,VITVI13G02016,VITVI13G00405,VITVI13G00409,VITVI13G00410,VITVI13G00491
GO:BP	branched-chain amino acid metabolic process	GO:0009081	0.00686057	2.16364	56	925	7	35134	VITVI07G01405,VITVI07G01247,VITVI04G00597,VITVI05G01660,VITVI05G01408,VITVI12G01806,VITVI18G02321
GO:BP	protein transmembrane import into intracellular organelle	GO:0044743	0.00702846	2.15314	41	925	6	35134	VITVI03G00848,VITVI11G00263,VITVI12G00706,VITVI14G00696,VITVI18G00338,VITVI19G00567
GO:BP	heme A biosynthetic process	GO:0006784	0.00702846	2.15314	2	925	2	35134	VITVI15G00440,VITVI19G00767
GO:BP	developmental process	GO:0032502	0.00702846	2.15314	1146	925	49	35134	VITVI08G02419,VITVI01G01311,VITVI01G02268,VITVI02G00645,VITVI02G00221,VITVI02G00341,VITVI02G00433,VITVI03G00452,VITVI04G00287,VITVI04G01689,VITVI05G00060,VITVI06G00833,VITVI06G01399,VITVI06G01491,VITVI07G00309,VITVI07G00410,VITVI07G00226,VITVI07G01605,VITVI07G00088,VITVI08G01652,VITVI08G00904,VITVI09G01487,VITVI10G00605,VITVI11G00350,VITVI11G00585,VITVI12G00283,VITVI12G00685,VITVI12G00767,VITVI13…
GO:BP	aspartyl-tRNA aminoacylation	GO:0006422	0.00702846	2.15314	2	925	2	35134	VITVI03G00728,VITVI04G00265
GO:BP	heme a metabolic process	GO:0046160	0.00702846	2.15314	2	925	2	35134	VITVI15G00440,VITVI19G00767
GO:BP	establishment of protein localization to mitochondrial membrane	GO:0090151	0.00702846	2.15314	16	925	4	35134	VITVI02G00274,VITVI06G00510,VITVI06G00700,VITVI14G01545
GO:BP	homoserine biosynthetic process	GO:0009090	0.00702846	2.15314	2	925	2	35134	VITVI01G01758,VITVI18G02321
GO:BP	mitochondrial glycyl-tRNA aminoacylation	GO:0070150	0.00702846	2.15314	2	925	2	35134	VITVI01G01774,VITVI17G00022
GO:BP	branched-chain amino acid biosynthetic process	GO:0009082	0.00750341	2.12474	28	925	5	35134	VITVI07G01247,VITVI05G01660,VITVI05G01408,VITVI12G01806,VITVI18G02321
GO:BP	RNA methylation	GO:0001510	0.00771577	2.11262	112	925	10	35134	VITVI07G01405,VITVI04G00134,VITVI04G00235,VITVI09G00224,VITVI12G01620,VITVI13G01959,VITVI13G00286,VITVI14G01561,VITVI16G01083,VITVI18G00920
GO:BP	organophosphate biosynthetic process	GO:0090407	0.00782543	2.10649	391	925	22	35134	VITVI01G01564,VITVI01G00333,VITVI03G00995,VITVI03G00254,VITVI04G02037,VITVI04G01645,VITVI05G00412,VITVI05G00054,VITVI06G00497,VITVI07G01033,VITVI08G01874,VITVI09G01301,VITVI12G02141,VITVI12G01578,VITVI13G01485,VITVI15G00445,VITVI17G00130,VITVI17G01038,VITVI18G01542,VITVI18G00486,VITVI19G01974,VITVI19G00551
GO:BP	RNA localization	GO:0006403	0.00791574	2.10151	75	925	8	35134	VITVI01G00613,VITVI04G00125,VITVI04G01298,VITVI11G00440,VITVI12G01613,VITVI14G00893,VITVI14G04569,VITVI15G00613
GO:BP	mitochondrial mRNA modification	GO:0080156	0.00849488	2.07084	17	925	4	35134	VITVI13G00859,VITVI17G01512,VITVI19G00129,VITVI19G00376
GO:BP	lysine metabolic process	GO:0006553	0.00849488	2.07084	17	925	4	35134	VITVI01G01758,VITVI05G01692,VITVI08G01085,VITVI18G02321
GO:BP	glutamine family amino acid biosynthetic process	GO:0009084	0.00859589	2.06571	29	925	5	35134	VITVI07G04669,VITVI08G01586,VITVI08G01672,VITVI09G00794,VITVI17G00138
GO:BP	homoserine metabolic process	GO:0009092	0.00897852	2.0468	8	925	3	35134	VITVI01G01758,VITVI18G02321,VITVI19G01681
GO:BP	establishment of protein localization to membrane	GO:0090150	0.00950945	2.02184	96	925	9	35134	VITVI01G01372,VITVI02G00274,VITVI02G00554,VITVI04G01014,VITVI06G00510,VITVI06G00700,VITVI08G00924,VITVI09G00876,VITVI14G01545
GO:BP	mitochondrial RNA modification	GO:1900864	0.0104773	1.97975	18	925	4	35134	VITVI13G00859,VITVI17G01512,VITVI19G00129,VITVI19G00376
GO:BP	localization within membrane	GO:0051668	0.0105591	1.97637	138	925	11	35134	VITVI01G01372,VITVI01G01620,VITVI02G00274,VITVI02G00554,VITVI04G01014,VITVI06G00510,VITVI06G00700,VITVI08G00924,VITVI09G00876,VITVI12G01578,VITVI14G01545
GO:BP	positive regulation of mRNA metabolic process	GO:1903313	0.0105987	1.97475	45	925	6	35134	VITVI05G00147,VITVI06G04198,VITVI06G01524,VITVI07G00195,VITVI09G00969,VITVI12G02034
GO:BP	response to oxidative stress	GO:0006979	0.01121	1.9504	277	925	17	35134	VITVI02G00444,VITVI07G00733,VITVI09G00045,VITVI10G01476,VITVI11G01210,VITVI13G01959,VITVI13G02014,VITVI13G02016,VITVI13G00405,VITVI13G00409,VITVI13G00410,VITVI13G00491,VITVI14G00096,VITVI14G00143,VITVI14G01821,VITVI16G00280,VITVI18G01553
GO:BP	nucleoside monophosphate metabolic process	GO:0009123	0.0115192	1.93858	80	925	8	35134	VITVI01G01564,VITVI04G01645,VITVI08G01874,VITVI13G01485,VITVI15G00445,VITVI17G00130,VITVI18G01542,VITVI18G00486
GO:BP	ribonucleotide biosynthetic process	GO:0009260	0.0116173	1.9349	140	925	11	35134	VITVI03G00254,VITVI04G02037,VITVI04G01645,VITVI08G01874,VITVI09G01301,VITVI13G01485,VITVI17G00130,VITVI17G01038,VITVI18G01542,VITVI18G00486,VITVI19G01974
GO:BP	post-embryonic development	GO:0009791	0.0116173	1.9349	485	925	25	35134	VITVI01G01311,VITVI05G00060,VITVI06G00833,VITVI06G01399,VITVI07G00309,VITVI07G01605,VITVI10G00605,VITVI11G00350,VITVI12G00283,VITVI12G00685,VITVI12G00767,VITVI13G01222,VITVI13G01892,VITVI13G01416,VITVI15G00533,VITVI15G00148,VITVI16G00168,VITVI16G00938,VITVI18G01542,VITVI18G00655,VITVI18G01553,VITVI19G01702,VITVI19G01704,VITVI19G01359,VITVI19G01438
GO:BP	positive regulation of gene expression	GO:0010628	0.0116269	1.93454	46	925	6	35134	VITVI01G00971,VITVI05G00147,VITVI06G00027,VITVI06G04198,VITVI07G00195,VITVI13G00354
GO:BP	regulatory ncRNA 3'-end processing	GO:0043628	0.0124353	1.90535	9	925	3	35134	VITVI07G00195,VITVI12G00367,VITVI16G01083
GO:BP	sno(s)RNA 3'-end processing	GO:0031126	0.0124353	1.90535	9	925	3	35134	VITVI07G00195,VITVI12G00367,VITVI16G01083
GO:BP	regulation of seedling development	GO:1900140	0.0124353	1.90535	19	925	4	35134	VITVI07G00309,VITVI07G01605,VITVI12G00685,VITVI19G01359
GO:BP	response to oxygen-containing compound	GO:1901700	0.0128292	1.8918	544	925	27	35134	VITVI01G01311,VITVI01G02268,VITVI02G00444,VITVI03G00452,VITVI03G00389,VITVI03G00773,VITVI07G01744,VITVI07G01605,VITVI08G00146,VITVI09G00015,VITVI09G00045,VITVI10G01476,VITVI10G00129,VITVI11G00279,VITVI11G00585,VITVI12G00685,VITVI13G01959,VITVI13G02014,VITVI13G02016,VITVI13G00405,VITVI13G00409,VITVI13G00410,VITVI13G00491,VITVI16G00280,VITVI17G00189,VITVI18G01553,VITVI19G01359
GO:BP	generation of precursor metabolites and energy	GO:0006091	0.0156558	1.80532	416	925	22	35134	VITVI00G04569,VITVI01G00698,VITVI02G00211,VITVI04G00441,VITVI04G02037,VITVI04G00860,VITVI06G00484,VITVI06G00574,VITVI06G00822,VITVI06G01487,VITVI07G00362,VITVI08G00113,VITVI09G01301,VITVI10G00129,VITVI11G00036,VITVI14G01964,VITVI14G04596,VITVI15G00440,VITVI15G00792,VITVI16G01182,VITVI17G00607,VITVI17G01162
GO:BP	sno(s)RNA processing	GO:0043144	0.017005	1.76942	10	925	3	35134	VITVI07G00195,VITVI12G00367,VITVI16G01083
GO:BP	sno(s)RNA metabolic process	GO:0016074	0.017005	1.76942	10	925	3	35134	VITVI07G00195,VITVI12G00367,VITVI16G01083
GO:BP	organic substance catabolic process	GO:1901575	0.017005	1.76942	1451	925	57	35134	VITVI07G01205,VITVI13G04636,VITVI07G01405,VITVI17G01311,VITVI13G00241,VITVI01G01563,VITVI01G00166,VITVI01G01023,VITVI01G00681,VITVI02G00176,VITVI02G00187,VITVI04G00039,VITVI04G00152,VITVI04G00597,VITVI04G02037,VITVI05G00396,VITVI05G00054,VITVI05G00043,VITVI05G01545,VITVI06G00574,VITVI06G00659,VITVI06G01524,VITVI07G00696,VITVI07G01892,VITVI07G00195,VITVI08G01735,VITVI08G00189,VITVI08G00752,VITVI09…
GO:BP	ribose phosphate metabolic process	GO:0019693	0.0170467	1.76836	193	925	13	35134	VITVI01G00132,VITVI03G00254,VITVI04G02037,VITVI04G01645,VITVI08G01874,VITVI09G01301,VITVI13G01485,VITVI15G00445,VITVI17G00130,VITVI17G01038,VITVI18G01542,VITVI18G00486,VITVI19G01974
GO:BP	unsaturated fatty acid metabolic process	GO:0033559	0.0170495	1.76829	3	925	2	35134	VITVI03G00452,VITVI17G00199
GO:BP	regulation of intrinsic apoptotic signaling pathway	GO:2001242	0.0170495	1.76829	3	925	2	35134	VITVI04G01014,VITVI09G00876
GO:BP	negative regulation of intrinsic apoptotic signaling pathway	GO:2001243	0.0170495	1.76829	3	925	2	35134	VITVI04G01014,VITVI09G00876
GO:BP	intrinsic apoptotic signaling pathway	GO:0097193	0.0170495	1.76829	3	925	2	35134	VITVI04G01014,VITVI09G00876
GO:BP	intrinsic apoptotic signaling pathway in response to hypoxia	GO:1990144	0.0170495	1.76829	3	925	2	35134	VITVI04G01014,VITVI09G00876
GO:BP	negative regulation of apoptotic signaling pathway	GO:2001234	0.0170495	1.76829	3	925	2	35134	VITVI04G01014,VITVI09G00876
GO:BP	negative regulation of cellular response to hypoxia	GO:1900038	0.0170495	1.76829	3	925	2	35134	VITVI04G01014,VITVI09G00876
GO:BP	unsaturated fatty acid biosynthetic process	GO:0006636	0.0170495	1.76829	3	925	2	35134	VITVI03G00452,VITVI17G00199
GO:BP	negative regulation of hypoxia-induced intrinsic apoptotic signaling pathway	GO:1903298	0.0170495	1.76829	3	925	2	35134	VITVI04G01014,VITVI09G00876
GO:BP	regulation of hypoxia-induced intrinsic apoptotic signaling pathway	GO:1903297	0.0170495	1.76829	3	925	2	35134	VITVI04G01014,VITVI09G00876
GO:BP	endonucleolytic cleavage to generate mature 5'-end of SSU-rRNA from (SSU-rRNA, 5.8S rRNA, LSU-rRNA)	GO:0000472	0.0170495	1.76829	3	925	2	35134	VITVI09G00015,VITVI16G00096
GO:BP	glycyl-tRNA aminoacylation	GO:0006426	0.0170495	1.76829	3	925	2	35134	VITVI01G01774,VITVI17G00022
GO:BP	endonucleolytic cleavage in 5'-ETS of tricistronic rRNA transcript (SSU-rRNA, 5.8S rRNA, LSU-rRNA)	GO:0000480	0.0170495	1.76829	3	925	2	35134	VITVI09G00015,VITVI16G00096
GO:BP	urea metabolic process	GO:0019627	0.0170495	1.76829	3	925	2	35134	VITVI01G01563,VITVI17G00138
GO:BP	purine nucleotide biosynthetic process	GO:0006164	0.0173901	1.7597	128	925	10	35134	VITVI01G00333,VITVI03G00254,VITVI04G02037,VITVI08G01874,VITVI09G01301,VITVI15G00445,VITVI17G01038,VITVI18G01542,VITVI18G00486,VITVI19G01974
GO:BP	embryo sac development	GO:0009553	0.0173901	1.7597	35	925	5	35134	VITVI02G00341,VITVI06G01491,VITVI07G00226,VITVI08G01652,VITVI19G01704
GO:BP	seed germination	GO:0009845	0.0173901	1.7597	35	925	5	35134	VITVI07G00309,VITVI07G01605,VITVI12G00685,VITVI13G01416,VITVI18G01542
GO:BP	cellular respiration	GO:0045333	0.0173901	1.7597	128	925	10	35134	VITVI01G00698,VITVI04G00441,VITVI04G00860,VITVI06G00822,VITVI07G00362,VITVI14G01964,VITVI14G04596,VITVI15G00440,VITVI17G00607,VITVI17G01162
GO:BP	ribonucleoside monophosphate biosynthetic process	GO:0009156	0.0175813	1.75495	51	925	6	35134	VITVI08G01874,VITVI13G01485,VITVI15G00445,VITVI17G00130,VITVI18G01542,VITVI18G00486
GO:BP	protein insertion into membrane	GO:0051205	0.0192144	1.71637	22	925	4	35134	VITVI02G00274,VITVI06G00510,VITVI06G00700,VITVI14G01545
GO:BP	purine-containing compound biosynthetic process	GO:0072522	0.0192144	1.71637	130	925	10	35134	VITVI01G00333,VITVI03G00254,VITVI04G02037,VITVI08G01874,VITVI09G01301,VITVI15G00445,VITVI17G01038,VITVI18G01542,VITVI18G00486,VITVI19G01974
GO:BP	non-membrane-bounded organelle assembly	GO:0140694	0.0192144	1.71637	130	925	10	35134	VITVI04G00980,VITVI06G04445,VITVI08G01709,VITVI08G01796,VITVI09G00043,VITVI12G01799,VITVI13G00718,VITVI14G01290,VITVI18G01543,VITVI19G00058
GO:BP	fatty acid biosynthetic process	GO:0006633	0.0192144	1.71637	152	925	11	35134	VITVI03G00452,VITVI04G01193,VITVI06G00158,VITVI06G00723,VITVI10G00753,VITVI10G01564,VITVI14G02043,VITVI15G00764,VITVI16G00895,VITVI17G00148,VITVI17G00199
GO:BP	ribosomal large subunit export from nucleus	GO:0000055	0.0204109	1.69014	11	925	3	35134	VITVI01G00599,VITVI15G01001,VITVI16G00155
GO:BP	poly(A)+ mRNA export from nucleus	GO:0016973	0.0204109	1.69014	11	925	3	35134	VITVI01G00613,VITVI11G00440,VITVI14G04569
GO:BP	tricarboxylic acid cycle	GO:0006099	0.0208097	1.68173	53	925	6	35134	VITVI01G00698,VITVI04G00860,VITVI07G00362,VITVI14G01964,VITVI17G00607,VITVI17G01162
GO:BP	endoplasmic reticulum unfolded protein response	GO:0030968	0.0223984	1.64978	23	925	4	35134	VITVI17G01311,VITVI02G00187,VITVI04G00039,VITVI05G01545
GO:BP	membrane organization	GO:0061024	0.0224086	1.64959	202	925	13	35134	VITVI02G00274,VITVI04G01319,VITVI04G01037,VITVI06G00510,VITVI06G00700,VITVI07G01797,VITVI08G00113,VITVI13G00018,VITVI14G01545,VITVI14G01999,VITVI18G01157,VITVI19G00207,VITVI19G01702
GO:BP	ribonucleoside monophosphate metabolic process	GO:0009161	0.0226133	1.64564	54	925	6	35134	VITVI08G01874,VITVI13G01485,VITVI15G00445,VITVI17G00130,VITVI18G01542,VITVI18G00486
GO:BP	cellular nitrogen compound catabolic process	GO:0044270	0.0237477	1.62438	180	925	12	35134	VITVI07G01405,VITVI06G01524,VITVI07G01892,VITVI07G00195,VITVI09G00969,VITVI12G01799,VITVI12G02034,VITVI12G00685,VITVI12G00367,VITVI13G00975,VITVI13G01622,VITVI14G01730
GO:BP	regulation of intracellular signal transduction	GO:1902531	0.0237477	1.62438	38	925	5	35134	VITVI02G00111,VITVI04G01014,VITVI09G00876,VITVI15G00733,VITVI19G01359
GO:BP	monocarboxylic acid metabolic process	GO:0032787	0.0244098	1.61244	410	925	21	35134	VITVI03G00452,VITVI04G01193,VITVI04G02037,VITVI06G00158,VITVI06G00574,VITVI06G00723,VITVI07G00128,VITVI09G01301,VITVI10G00753,VITVI10G01564,VITVI10G00129,VITVI12G02141,VITVI12G02504,VITVI14G00614,VITVI14G02043,VITVI15G00764,VITVI16G00895,VITVI16G01182,VITVI16G01857,VITVI17G00148,VITVI17G00199
GO:BP	heterocycle catabolic process	GO:0046700	0.024638	1.60839	181	925	12	35134	VITVI07G01405,VITVI06G01524,VITVI07G01892,VITVI07G00195,VITVI09G00969,VITVI12G01799,VITVI12G02034,VITVI12G00685,VITVI12G00367,VITVI13G00975,VITVI13G01622,VITVI14G01730
GO:BP	rRNA catabolic process	GO:0016075	0.025501	1.59344	12	925	3	35134	VITVI07G01892,VITVI07G00195,VITVI12G00367
GO:BP	malate metabolic process	GO:0006108	0.025501	1.59344	24	925	4	35134	VITVI04G00144,VITVI07G00362,VITVI14G01964,VITVI17G00607
GO:BP	cellular response to chemical stress	GO:0062197	0.025501	1.59344	74	925	7	35134	VITVI02G00444,VITVI06G00991,VITVI07G00733,VITVI08G00146,VITVI10G01476,VITVI14G00096,VITVI16G00280
GO:BP	catabolic process	GO:0009056	0.0261808	1.58202	1556	925	59	35134	VITVI07G01205,VITVI13G04636,VITVI07G01405,VITVI17G01311,VITVI13G00241,VITVI01G01563,VITVI01G00166,VITVI01G01023,VITVI01G00681,VITVI02G00176,VITVI02G00187,VITVI04G00039,VITVI04G00152,VITVI04G00597,VITVI04G02037,VITVI04G00880,VITVI05G00396,VITVI05G00054,VITVI05G00043,VITVI05G01545,VITVI06G00574,VITVI06G00659,VITVI06G01524,VITVI07G00285,VITVI07G00696,VITVI07G01892,VITVI07G00195,VITVI08G01735,VITVI08…
GO:BP	aerobic respiration	GO:0009060	0.0274594	1.56131	116	925	9	35134	VITVI01G00698,VITVI04G00441,VITVI04G00860,VITVI06G00822,VITVI07G00362,VITVI14G01964,VITVI14G04596,VITVI17G00607,VITVI17G01162
GO:BP	developmental process involved in reproduction	GO:0003006	0.027746	1.5568	443	925	22	35134	VITVI05G00060,VITVI06G00833,VITVI06G01399,VITVI07G01605,VITVI08G00904,VITVI10G00605,VITVI11G00350,VITVI12G00283,VITVI12G00685,VITVI13G01959,VITVI13G01222,VITVI13G01892,VITVI15G00533,VITVI15G00148,VITVI16G00168,VITVI16G00938,VITVI18G00655,VITVI18G02361,VITVI18G01553,VITVI19G01702,VITVI19G01359,VITVI19G01438
GO:BP	reproductive structure development	GO:0048608	0.0280302	1.55237	389	925	20	35134	VITVI05G00060,VITVI06G00833,VITVI06G01399,VITVI07G01605,VITVI10G00605,VITVI11G00350,VITVI12G00283,VITVI12G00685,VITVI13G01959,VITVI13G01222,VITVI13G01892,VITVI15G00533,VITVI15G00148,VITVI16G00168,VITVI16G00938,VITVI18G00655,VITVI18G01553,VITVI19G01702,VITVI19G01359,VITVI19G01438
GO:BP	apoptotic signaling pathway	GO:0097190	0.0282526	1.54894	4	925	2	35134	VITVI04G01014,VITVI09G00876
GO:BP	response to karrikin	GO:0080167	0.0282526	1.54894	4	925	2	35134	VITVI13G01892,VITVI18G01553
GO:BP	Group II intron splicing	GO:0000373	0.0282526	1.54894	25	925	4	35134	VITVI01G02047,VITVI01G02053,VITVI12G00003,VITVI14G01827
GO:BP	cristae formation	GO:0042407	0.0282526	1.54894	4	925	2	35134	VITVI07G01797,VITVI19G01702
GO:BP	cellular response to water deprivation	GO:0042631	0.0282526	1.54894	4	925	2	35134	VITVI03G00389,VITVI08G00146
GO:BP	'de novo' cotranslational protein folding	GO:0051083	0.0282526	1.54894	4	925	2	35134	VITVI02G00645,VITVI19G00569
GO:BP	purine nucleotide metabolic process	GO:0006163	0.0282526	1.54894	210	925	13	35134	VITVI00G04569,VITVI01G00132,VITVI01G00333,VITVI03G00254,VITVI04G02037,VITVI04G00860,VITVI08G01874,VITVI09G01301,VITVI15G00445,VITVI17G01038,VITVI18G01542,VITVI18G00486,VITVI19G01974
GO:BP	leucine biosynthetic process	GO:0009098	0.0282526	1.54894	4	925	2	35134	VITVI05G01408,VITVI12G01806
GO:BP	cellular response to water stimulus	GO:0071462	0.0282526	1.54894	4	925	2	35134	VITVI03G00389,VITVI08G00146
GO:BP	regulation of apoptotic signaling pathway	GO:2001233	0.0282526	1.54894	4	925	2	35134	VITVI04G01014,VITVI09G00876
GO:BP	mRNA polyadenylation	GO:0006378	0.0282526	1.54894	25	925	4	35134	VITVI01G00355,VITVI08G01511,VITVI14G01896,VITVI15G01169
GO:BP	ribonucleotide metabolic process	GO:0009259	0.0282526	1.54894	186	925	12	35134	VITVI01G00132,VITVI03G00254,VITVI04G02037,VITVI04G01645,VITVI08G01874,VITVI09G01301,VITVI13G01485,VITVI17G00130,VITVI17G01038,VITVI18G01542,VITVI18G00486,VITVI19G01974
GO:BP	CUT metabolic process	GO:0071043	0.0282526	1.54894	4	925	2	35134	VITVI07G00195,VITVI12G00367
GO:BP	CUT catabolic process	GO:0071034	0.0282526	1.54894	4	925	2	35134	VITVI07G00195,VITVI12G00367
GO:BP	regulation of cellular response to hypoxia	GO:1900037	0.0282526	1.54894	4	925	2	35134	VITVI04G01014,VITVI09G00876
GO:BP	cellular response to hypoxia	GO:0071456	0.0282526	1.54894	4	925	2	35134	VITVI04G01014,VITVI09G00876
GO:BP	organelle assembly	GO:0070925	0.0286113	1.54346	163	925	11	35134	VITVI04G00980,VITVI06G04445,VITVI08G01709,VITVI08G01796,VITVI09G00043,VITVI12G01799,VITVI13G00718,VITVI14G01290,VITVI18G01543,VITVI18G01157,VITVI19G00058
GO:BP	reproductive system development	GO:0061458	0.0292846	1.53336	393	925	20	35134	VITVI05G00060,VITVI06G00833,VITVI06G01399,VITVI07G01605,VITVI10G00605,VITVI11G00350,VITVI12G00283,VITVI12G00685,VITVI13G01959,VITVI13G01222,VITVI13G01892,VITVI15G00533,VITVI15G00148,VITVI16G00168,VITVI16G00938,VITVI18G00655,VITVI18G01553,VITVI19G01702,VITVI19G01359,VITVI19G01438
GO:BP	regulatory ncRNA processing	GO:0070918	0.0296889	1.52741	41	925	5	35134	VITVI07G00195,VITVI12G00367,VITVI12G00521,VITVI13G01134,VITVI16G01083
GO:BP	peptidyl-histidine modification	GO:0018202	0.0296889	1.52741	13	925	3	35134	VITVI15G04172,VITVI08G00256,VITVI12G00685
GO:BP	organic cyclic compound catabolic process	GO:1901361	0.0296926	1.52735	262	925	15	35134	VITVI07G01405,VITVI06G01524,VITVI07G00696,VITVI07G01892,VITVI07G00195,VITVI08G01735,VITVI09G00969,VITVI12G00071,VITVI12G01799,VITVI12G02034,VITVI12G00685,VITVI12G00367,VITVI13G00975,VITVI13G01622,VITVI14G01730
GO:BP	RNA catabolic process	GO:0006401	0.0313392	1.50391	120	925	9	35134	VITVI06G01524,VITVI07G01892,VITVI07G00195,VITVI09G00969,VITVI12G01799,VITVI12G02034,VITVI12G00367,VITVI13G00975,VITVI14G01730
GO:BP	cell wall organization	GO:0071555	0.0319978	1.49488	239	925	14	35134	VITVI08G02419,VITVI02G00433,VITVI02G01272,VITVI04G00465,VITVI04G01689,VITVI05G00276,VITVI05G00043,VITVI07G01692,VITVI08G01897,VITVI14G02897,VITVI15G00781,VITVI17G00480,VITVI18G00189,VITVI19G01359
GO:BP	tRNA methylation	GO:0030488	0.032505	1.48805	42	925	5	35134	VITVI04G00235,VITVI09G00224,VITVI12G01620,VITVI13G01959,VITVI13G00286
GO:BP	fatty acid metabolic process	GO:0006631	0.032942	1.48225	240	925	14	35134	VITVI03G00452,VITVI04G01193,VITVI06G00158,VITVI06G00723,VITVI07G00128,VITVI10G00753,VITVI10G01564,VITVI12G02504,VITVI14G00614,VITVI14G02043,VITVI15G00764,VITVI16G00895,VITVI17G00148,VITVI17G00199
GO:BP	aspartate family amino acid metabolic process	GO:0009066	0.0332829	1.47778	60	925	6	35134	VITVI01G01758,VITVI04G00144,VITVI05G01692,VITVI08G01085,VITVI12G04066,VITVI18G02321
GO:BP	energy derivation by oxidation of organic compounds	GO:0015980	0.0350748	1.45501	145	925	10	35134	VITVI01G00698,VITVI04G00441,VITVI04G00860,VITVI06G00822,VITVI07G00362,VITVI14G01964,VITVI14G04596,VITVI15G00440,VITVI17G00607,VITVI17G01162
GO:BP	mitochondrial electron transport, ubiquinol to cytochrome c	GO:0006122	0.0358044	1.44606	14	925	3	35134	VITVI04G00441,VITVI06G00822,VITVI14G04596
GO:BP	regulation of reactive oxygen species metabolic process	GO:2000377	0.0358044	1.44606	14	925	3	35134	VITVI03G00452,VITVI11G00585,VITVI13G00049
GO:BP	purine-containing compound metabolic process	GO:0072521	0.0376063	1.42474	219	925	13	35134	VITVI00G04569,VITVI01G00132,VITVI01G00333,VITVI03G00254,VITVI04G02037,VITVI04G00860,VITVI08G01874,VITVI09G01301,VITVI15G00445,VITVI17G01038,VITVI18G01542,VITVI18G00486,VITVI19G01974
GO:BP	nucleoside monophosphate biosynthetic process	GO:0009124	0.0384156	1.41549	62	925	6	35134	VITVI08G01874,VITVI13G01485,VITVI15G00445,VITVI17G00130,VITVI18G01542,VITVI18G00486
GO:BP	reactive oxygen species metabolic process	GO:0072593	0.0397056	1.40115	148	925	10	35134	VITVI13G00241,VITVI02G00444,VITVI03G00452,VITVI10G01476,VITVI11G01210,VITVI11G00585,VITVI13G00049,VITVI14G01821,VITVI16G00280,VITVI19G01359
GO:BP	post-transcriptional regulation of gene expression	GO:0010608	0.0402526	1.39521	172	925	11	35134	VITVI07G02582,VITVI01G00971,VITVI05G00818,VITVI05G00060,VITVI06G01524,VITVI07G00923,VITVI07G00195,VITVI09G00015,VITVI09G00969,VITVI12G02034,VITVI13G00354
GO:BP	cellular response to superoxide	GO:0071451	0.0406539	1.3909	15	925	3	35134	VITVI02G00444,VITVI10G01476,VITVI16G00280
GO:BP	protein insertion into mitochondrial outer membrane	GO:0045040	0.0406539	1.3909	5	925	2	35134	VITVI06G00510,VITVI14G01545
GO:BP	S-adenosylmethionine cycle	GO:0033353	0.0406539	1.3909	5	925	2	35134	VITVI12G04066,VITVI17G00983
GO:BP	outer mitochondrial membrane organization	GO:0007008	0.0406539	1.3909	5	925	2	35134	VITVI06G00510,VITVI14G01545
GO:BP	arginine biosynthetic process	GO:0006526	0.0406539	1.3909	15	925	3	35134	VITVI07G04669,VITVI09G00794,VITVI17G00138
GO:BP	secretion by cell	GO:0032940	0.0406539	1.3909	63	925	6	35134	VITVI13G00233,VITVI02G00221,VITVI03G00344,VITVI04G01319,VITVI04G01037,VITVI13G00678
GO:BP	tRNA aminoacylation for mitochondrial protein translation	GO:0070127	0.0406539	1.3909	5	925	2	35134	VITVI01G01774,VITVI17G00022
GO:BP	regulation of seed germination	GO:0010029	0.0406539	1.3909	15	925	3	35134	VITVI07G00309,VITVI07G01605,VITVI12G00685
GO:BP	cellular response to oxygen radical	GO:0071450	0.0406539	1.3909	15	925	3	35134	VITVI02G00444,VITVI10G01476,VITVI16G00280
GO:BP	cellular response to oxygen levels	GO:0071453	0.0406539	1.3909	5	925	2	35134	VITVI04G01014,VITVI09G00876
GO:BP	rRNA 5'-end processing	GO:0000967	0.0406539	1.3909	5	925	2	35134	VITVI09G00015,VITVI16G00096
GO:BP	negative regulation of apoptotic process	GO:0043066	0.0406539	1.3909	5	925	2	35134	VITVI04G01014,VITVI09G00876
GO:BP	removal of superoxide radicals	GO:0019430	0.0406539	1.3909	15	925	3	35134	VITVI02G00444,VITVI10G01476,VITVI16G00280
GO:BP	carbohydrate derivative biosynthetic process	GO:1901137	0.0406539	1.3909	408	925	20	35134	VITVI02G01272,VITVI03G00254,VITVI04G02037,VITVI04G01645,VITVI05G00412,VITVI07G00622,VITVI07G01033,VITVI08G01874,VITVI09G01301,VITVI10G00713,VITVI13G01485,VITVI15G00445,VITVI16G00864,VITVI17G00130,VITVI17G01038,VITVI17G01164,VITVI18G01542,VITVI18G00486,VITVI18G01426,VITVI19G01974
GO:BP	cellular response to decreased oxygen levels	GO:0036294	0.0406539	1.3909	5	925	2	35134	VITVI04G01014,VITVI09G00876
GO:BP	tRNA 3'-end processing	GO:0042780	0.0406539	1.3909	5	925	2	35134	VITVI12G00465,VITVI18G01807
GO:BP	response to oxygen radical	GO:0000305	0.0406539	1.3909	15	925	3	35134	VITVI02G00444,VITVI10G01476,VITVI16G00280
GO:BP	response to cold	GO:0009409	0.0406539	1.3909	83	925	7	35134	VITVI01G00681,VITVI01G01815,VITVI03G00389,VITVI09G00224,VITVI12G00288,VITVI12G00685,VITVI18G01553
GO:BP	ribosomal small subunit export from nucleus	GO:0000056	0.0406539	1.3909	5	925	2	35134	VITVI09G00015,VITVI16G00155
GO:BP	response to superoxide	GO:0000303	0.0406539	1.3909	15	925	3	35134	VITVI02G00444,VITVI10G01476,VITVI16G00280
GO:BP	aromatic amino acid metabolic process	GO:0009072	0.0414529	1.38245	84	925	7	35134	VITVI13G04616,VITVI06G00346,VITVI07G00696,VITVI07G00047,VITVI09G00719,VITVI12G00071,VITVI12G00745
GO:BP	macromolecule catabolic process	GO:0009057	0.0418644	1.37815	851	925	35	35134	VITVI07G01205,VITVI13G04636,VITVI17G01311,VITVI01G00166,VITVI01G01023,VITVI01G00681,VITVI02G00176,VITVI02G00187,VITVI04G00039,VITVI04G00152,VITVI05G00396,VITVI05G00043,VITVI05G01545,VITVI06G01524,VITVI07G01892,VITVI07G00195,VITVI08G00189,VITVI08G00752,VITVI09G00211,VITVI09G00969,VITVI11G00921,VITVI12G01799,VITVI12G02034,VITVI12G00367,VITVI12G00558,VITVI13G01222,VITVI13G00975,VITVI14G00096,VITVI14…
GO:BP	system development	GO:0048731	0.0425775	1.37082	642	925	28	35134	VITVI02G00645,VITVI02G00221,VITVI03G00452,VITVI05G00060,VITVI06G00833,VITVI06G01399,VITVI07G01605,VITVI09G01487,VITVI10G00605,VITVI11G00350,VITVI11G00585,VITVI12G00283,VITVI12G00685,VITVI13G01959,VITVI13G01222,VITVI13G01702,VITVI13G01892,VITVI15G00533,VITVI15G00148,VITVI16G00168,VITVI16G01313,VITVI16G00938,VITVI18G00655,VITVI18G01553,VITVI19G00207,VITVI19G01702,VITVI19G01359,VITVI19G01438
GO:BP	regulation of developmental process	GO:0050793	0.0427438	1.36913	225	925	13	35134	VITVI04G01689,VITVI07G00309,VITVI07G00410,VITVI07G01605,VITVI09G01487,VITVI10G00605,VITVI11G00585,VITVI12G00685,VITVI13G01959,VITVI13G01892,VITVI18G01553,VITVI19G00207,VITVI19G01359
GO:BP	response to unfolded protein	GO:0006986	0.0456244	1.3408	30	925	4	35134	VITVI17G01311,VITVI02G00187,VITVI04G00039,VITVI05G01545
GO:BP	cellular response to unfolded protein	GO:0034620	0.0456244	1.3408	30	925	4	35134	VITVI17G01311,VITVI02G00187,VITVI04G00039,VITVI05G01545
GO:BP	pyrimidine ribonucleotide biosynthetic process	GO:0009220	0.0456244	1.3408	30	925	4	35134	VITVI04G01645,VITVI13G01485,VITVI17G00130,VITVI17G01038
GO:BP	pyrimidine ribonucleotide metabolic process	GO:0009218	0.0456244	1.3408	30	925	4	35134	VITVI04G01645,VITVI13G01485,VITVI17G00130,VITVI17G01038
GO:BP	aromatic compound catabolic process	GO:0019439	0.0456244	1.3408	253	925	14	35134	VITVI06G01524,VITVI07G00696,VITVI07G01892,VITVI07G00195,VITVI08G01735,VITVI09G00969,VITVI12G00071,VITVI12G01799,VITVI12G02034,VITVI12G00685,VITVI12G00367,VITVI13G00975,VITVI13G01622,VITVI14G01730
GO:BP	aromatic amino acid family biosynthetic process	GO:0009073	0.0461263	1.33605	47	925	5	35134	VITVI13G04616,VITVI06G00346,VITVI07G00047,VITVI09G00719,VITVI12G00745
GO:BP	ncRNA catabolic process	GO:0034661	0.0471026	1.32696	16	925	3	35134	VITVI07G01892,VITVI07G00195,VITVI12G00367
GO:BP	nucleobase-containing compound transport	GO:0015931	0.0487112	1.31237	155	925	10	35134	VITVI07G04489,VITVI01G00613,VITVI04G00125,VITVI04G01298,VITVI11G00440,VITVI12G01613,VITVI14G00893,VITVI14G04569,VITVI15G00613,VITVI18G02433
GO:CC	intracellular anatomical structure	GO:0005622	1.32839e-90	89.8767	10380	925	570	35134	VITVI07G01205,VITVI07G00078,VITVI10G00217,VITVI13G04636,VITVI07G04489,VITVI07G01114,VITVI07G01405,VITVI07G01247,VITVI01G00652,VITVI02G00565,VITVI00G04569,VITVI08G02419,VITVI04G01526,VITVI17G01311,VITVI13G00233,VITVI07G01393,VITVI10G04226,VITVI10G00387,VITVI04G01545,VITVI02G01712,VITVI15G04488,VITVI07G04669,VITVI10G00275,VITVI07G02548,VITVI10G02201,VITVI10G02255,VITVI10G04134,VITVI13G04616,VITVI01…
GO:CC	cytoplasm	GO:0005737	1.11662e-77	76.9521	6370	925	414	35134	VITVI07G01205,VITVI10G00217,VITVI13G04636,VITVI07G04489,VITVI07G01114,VITVI07G01405,VITVI07G01247,VITVI01G00652,VITVI02G00565,VITVI00G04569,VITVI08G02419,VITVI04G01526,VITVI17G01311,VITVI13G00233,VITVI07G01393,VITVI10G04226,VITVI02G01712,VITVI15G04488,VITVI07G04669,VITVI07G02548,VITVI10G02255,VITVI13G04616,VITVI01G01311,VITVI01G01372,VITVI01G01376,VITVI01G01457,VITVI01G01563,VITVI01G01564,VITVI01…
GO:CC	intracellular organelle	GO:0043229	9.10915e-66	65.0405	8795	925	475	35134	VITVI07G01205,VITVI07G00078,VITVI13G04636,VITVI07G04489,VITVI07G01114,VITVI07G01405,VITVI01G00652,VITVI02G00565,VITVI08G02419,VITVI04G01526,VITVI17G01311,VITVI10G04226,VITVI10G00387,VITVI04G01545,VITVI02G01712,VITVI10G00275,VITVI07G02548,VITVI10G02201,VITVI10G04134,VITVI13G04616,VITVI01G01311,VITVI01G01372,VITVI01G01457,VITVI01G01564,VITVI01G01620,VITVI01G02268,VITVI01G00052,VITVI01G00156,VITVI01…
GO:CC	organelle	GO:0043226	2.32265e-65	64.634	8827	925	475	35134	VITVI07G01205,VITVI07G00078,VITVI13G04636,VITVI07G04489,VITVI07G01114,VITVI07G01405,VITVI01G00652,VITVI02G00565,VITVI08G02419,VITVI04G01526,VITVI17G01311,VITVI10G04226,VITVI10G00387,VITVI04G01545,VITVI02G01712,VITVI10G00275,VITVI07G02548,VITVI10G02201,VITVI10G04134,VITVI13G04616,VITVI01G01311,VITVI01G01372,VITVI01G01457,VITVI01G01564,VITVI01G01620,VITVI01G02268,VITVI01G00052,VITVI01G00156,VITVI01…
GO:CC	cellular_component	GO:0005575	6.45992e-60	59.1898	17597	925	706	35134	VITVI10G01219,VITVI07G01205,VITVI07G00078,VITVI10G00217,VITVI13G04636,VITVI07G04489,VITVI07G01114,VITVI07G01405,VITVI07G01247,VITVI01G00652,VITVI07G04463,VITVI02G00565,VITVI00G04569,VITVI08G02419,VITVI04G01526,VITVI17G01311,VITVI13G00233,VITVI07G01393,VITVI10G04226,VITVI10G00387,VITVI04G01545,VITVI00G04504,VITVI00G04505,VITVI02G01712,VITVI15G04488,VITVI07G04669,VITVI10G00275,VITVI07G02548,VITVI10…
GO:CC	cellular anatomical entity	GO:0110165	6.25614e-59	58.2037	17432	925	700	35134	VITVI10G01219,VITVI07G01205,VITVI07G00078,VITVI10G00217,VITVI13G04636,VITVI07G04489,VITVI07G01114,VITVI07G01405,VITVI07G01247,VITVI01G00652,VITVI07G04463,VITVI02G00565,VITVI00G04569,VITVI08G02419,VITVI04G01526,VITVI17G01311,VITVI13G00233,VITVI07G01393,VITVI10G04226,VITVI10G00387,VITVI04G01545,VITVI00G04504,VITVI00G04505,VITVI02G01712,VITVI15G04488,VITVI07G04669,VITVI10G00275,VITVI07G02548,VITVI10…
GO:CC	intracellular membrane-bounded organelle	GO:0043231	6.76295e-51	50.1699	7998	925	418	35134	VITVI07G01205,VITVI07G00078,VITVI13G04636,VITVI07G04489,VITVI07G01405,VITVI01G00652,VITVI02G00565,VITVI08G02419,VITVI04G01526,VITVI17G01311,VITVI10G04226,VITVI10G00387,VITVI04G01545,VITVI10G00275,VITVI07G02548,VITVI10G02201,VITVI10G04134,VITVI13G04616,VITVI01G01311,VITVI01G01372,VITVI01G01457,VITVI01G01564,VITVI01G01620,VITVI01G02268,VITVI01G00052,VITVI01G00156,VITVI01G00166,VITVI01G00173,VITVI01…
GO:CC	membrane-bounded organelle	GO:0043227	3.13301e-50	49.504	8046	925	418	35134	VITVI07G01205,VITVI07G00078,VITVI13G04636,VITVI07G04489,VITVI07G01405,VITVI01G00652,VITVI02G00565,VITVI08G02419,VITVI04G01526,VITVI17G01311,VITVI10G04226,VITVI10G00387,VITVI04G01545,VITVI10G00275,VITVI07G02548,VITVI10G02201,VITVI10G04134,VITVI13G04616,VITVI01G01311,VITVI01G01372,VITVI01G01457,VITVI01G01564,VITVI01G01620,VITVI01G02268,VITVI01G00052,VITVI01G00156,VITVI01G00166,VITVI01G00173,VITVI01…
GO:CC	protein-containing complex	GO:0032991	4.01103e-50	49.3967	2986	925	230	35134	VITVI10G00217,VITVI13G04636,VITVI07G01114,VITVI13G00233,VITVI10G00387,VITVI02G01712,VITVI15G04488,VITVI07G02548,VITVI10G02201,VITVI10G02255,VITVI10G04134,VITVI01G01311,VITVI01G01563,VITVI01G01620,VITVI01G00166,VITVI01G04125,VITVI01G00572,VITVI01G00971,VITVI01G02047,VITVI01G02053,VITVI01G00594,VITVI01G00613,VITVI01G01815,VITVI02G00662,VITVI02G01315,VITVI02G00111,VITVI02G00176,VITVI02G00187,VITVI02…
GO:CC	ribonucleoprotein complex	GO:1990904	1.80404e-45	44.7438	763	925	108	35134	VITVI07G01114,VITVI10G00387,VITVI02G01712,VITVI07G02548,VITVI10G02255,VITVI01G04125,VITVI01G00572,VITVI01G00971,VITVI01G02047,VITVI01G02053,VITVI01G01815,VITVI02G01315,VITVI02G00341,VITVI03G01189,VITVI03G01190,VITVI04G00064,VITVI04G00332,VITVI04G00554,VITVI04G00640,VITVI04G01298,VITVI04G02132,VITVI04G00980,VITVI05G00254,VITVI05G00835,VITVI05G01254,VITVI05G00147,VITVI05G00033,VITVI05G01593,VITVI06…
GO:CC	non-membrane-bounded organelle	GO:0043228	4.15312e-31	30.3816	1823	925	144	35134	VITVI01G00652,VITVI04G01545,VITVI02G01712,VITVI07G02548,VITVI10G02201,VITVI10G04134,VITVI01G01457,VITVI01G02268,VITVI01G00173,VITVI01G00971,VITVI01G00599,VITVI01G01815,VITVI02G01315,VITVI02G00320,VITVI03G01190,VITVI03G00089,VITVI03G00721,VITVI04G00064,VITVI04G00098,VITVI04G00134,VITVI04G00261,VITVI04G00265,VITVI04G00376,VITVI04G00554,VITVI04G01298,VITVI04G02132,VITVI04G00980,VITVI05G00254,VITVI05…
GO:CC	intracellular non-membrane-bounded organelle	GO:0043232	4.15312e-31	30.3816	1823	925	144	35134	VITVI01G00652,VITVI04G01545,VITVI02G01712,VITVI07G02548,VITVI10G02201,VITVI10G04134,VITVI01G01457,VITVI01G02268,VITVI01G00173,VITVI01G00971,VITVI01G00599,VITVI01G01815,VITVI02G01315,VITVI02G00320,VITVI03G01190,VITVI03G00089,VITVI03G00721,VITVI04G00064,VITVI04G00098,VITVI04G00134,VITVI04G00261,VITVI04G00265,VITVI04G00376,VITVI04G00554,VITVI04G01298,VITVI04G02132,VITVI04G00980,VITVI05G00254,VITVI05…
GO:CC	nucleolus	GO:0005730	6.3531e-30	29.197	238	925	51	35134	VITVI04G01545,VITVI01G00173,VITVI01G00599,VITVI01G01815,VITVI03G00089,VITVI04G00134,VITVI04G01298,VITVI05G00060,VITVI05G01593,VITVI06G01399,VITVI06G01406,VITVI06G01501,VITVI07G00574,VITVI07G01999,VITVI07G00195,VITVI07G00226,VITVI07G01162,VITVI08G01212,VITVI08G01233,VITVI08G01588,VITVI08G01652,VITVI08G01813,VITVI08G01871,VITVI08G01971,VITVI08G00640,VITVI09G00015,VITVI09G00523,VITVI09G01400,VITVI09…
GO:CC	cytosol	GO:0005829	6.56042e-30	29.1831	1109	925	107	35134	VITVI07G01205,VITVI10G00217,VITVI07G01114,VITVI07G01247,VITVI02G01712,VITVI15G04488,VITVI01G01311,VITVI01G04125,VITVI01G00971,VITVI01G01023,VITVI01G00594,VITVI01G01815,VITVI02G00645,VITVI02G00729,VITVI02G01315,VITVI02G00176,VITVI03G00056,VITVI03G00254,VITVI03G00452,VITVI03G00331,VITVI04G00064,VITVI04G00144,VITVI04G00265,VITVI04G00554,VITVI04G00980,VITVI04G00880,VITVI05G00818,VITVI05G00835,VITVI05…
GO:CC	organelle lumen	GO:0043233	4.04906e-28	27.3926	692	925	81	35134	VITVI04G01545,VITVI07G02548,VITVI01G00173,VITVI01G00599,VITVI01G01815,VITVI02G00187,VITVI02G00274,VITVI02G00341,VITVI03G00089,VITVI03G00543,VITVI04G00134,VITVI04G01298,VITVI04G02028,VITVI05G00254,VITVI05G00060,VITVI05G01593,VITVI05G01545,VITVI06G00073,VITVI06G00651,VITVI06G01399,VITVI06G01406,VITVI06G01501,VITVI07G00574,VITVI07G01892,VITVI07G01999,VITVI07G00195,VITVI07G00226,VITVI07G01162,VITVI08…
GO:CC	membrane-enclosed lumen	GO:0031974	4.04906e-28	27.3926	692	925	81	35134	VITVI04G01545,VITVI07G02548,VITVI01G00173,VITVI01G00599,VITVI01G01815,VITVI02G00187,VITVI02G00274,VITVI02G00341,VITVI03G00089,VITVI03G00543,VITVI04G00134,VITVI04G01298,VITVI04G02028,VITVI05G00254,VITVI05G00060,VITVI05G01593,VITVI05G01545,VITVI06G00073,VITVI06G00651,VITVI06G01399,VITVI06G01406,VITVI06G01501,VITVI07G00574,VITVI07G01892,VITVI07G01999,VITVI07G00195,VITVI07G00226,VITVI07G01162,VITVI08…
GO:CC	intracellular organelle lumen	GO:0070013	4.04906e-28	27.3926	692	925	81	35134	VITVI04G01545,VITVI07G02548,VITVI01G00173,VITVI01G00599,VITVI01G01815,VITVI02G00187,VITVI02G00274,VITVI02G00341,VITVI03G00089,VITVI03G00543,VITVI04G00134,VITVI04G01298,VITVI04G02028,VITVI05G00254,VITVI05G00060,VITVI05G01593,VITVI05G01545,VITVI06G00073,VITVI06G00651,VITVI06G01399,VITVI06G01406,VITVI06G01501,VITVI07G00574,VITVI07G01892,VITVI07G01999,VITVI07G00195,VITVI07G00226,VITVI07G01162,VITVI08…
GO:CC	preribosome	GO:0030684	5.02571e-25	24.2988	83	925	30	35134	VITVI02G00341,VITVI04G01298,VITVI05G01593,VITVI07G01999,VITVI07G01162,VITVI08G01233,VITVI08G01588,VITVI08G01652,VITVI08G01971,VITVI08G00640,VITVI09G00015,VITVI10G00908,VITVI11G00452,VITVI12G00264,VITVI12G01799,VITVI12G00029,VITVI13G01540,VITVI14G00383,VITVI14G01703,VITVI14G01405,VITVI14G01290,VITVI15G01001,VITVI16G01514,VITVI16G00096,VITVI16G01083,VITVI17G00141,VITVI17G00840,VITVI17G00910,VITVI18…
GO:CC	cytosolic ribosome	GO:0022626	4.40049e-21	20.3565	204	925	39	35134	VITVI02G01712,VITVI01G00971,VITVI02G01315,VITVI04G00064,VITVI04G00554,VITVI04G00980,VITVI05G01254,VITVI05G00033,VITVI06G00032,VITVI06G00041,VITVI06G00701,VITVI06G01491,VITVI06G04445,VITVI07G00923,VITVI07G01329,VITVI08G01709,VITVI08G01796,VITVI08G01037,VITVI09G00043,VITVI09G01927,VITVI09G04364,VITVI09G00980,VITVI10G00761,VITVI10G01883,VITVI11G00222,VITVI12G00155,VITVI12G00164,VITVI12G01799,VITVI13…
GO:CC	mitochondrion	GO:0005739	1.07951e-20	19.9668	879	925	80	35134	VITVI07G01405,VITVI07G02548,VITVI01G01311,VITVI01G01564,VITVI01G00800,VITVI01G00681,VITVI01G01774,VITVI02G00194,VITVI02G00274,VITVI02G00320,VITVI03G00485,VITVI03G00848,VITVI04G00441,VITVI04G00597,VITVI04G00860,VITVI05G00254,VITVI05G01112,VITVI06G00510,VITVI06G00651,VITVI06G00700,VITVI06G00822,VITVI06G01491,VITVI07G00362,VITVI07G01797,VITVI07G00186,VITVI08G01676,VITVI09G00137,VITVI09G00186,VITVI09…
GO:CC	nuclear lumen	GO:0031981	5.29292e-20	19.2763	549	925	61	35134	VITVI04G01545,VITVI01G00173,VITVI01G00599,VITVI01G01815,VITVI02G00341,VITVI03G00089,VITVI03G00543,VITVI04G00134,VITVI04G01298,VITVI04G02028,VITVI05G00060,VITVI05G01593,VITVI06G00073,VITVI06G01399,VITVI06G01406,VITVI06G01501,VITVI07G00574,VITVI07G01892,VITVI07G01999,VITVI07G00195,VITVI07G00226,VITVI07G01162,VITVI08G01212,VITVI08G01233,VITVI08G01588,VITVI08G01652,VITVI08G01729,VITVI08G01813,VITVI08…
GO:CC	ribosomal subunit	GO:0044391	7.76891e-19	18.1096	262	925	41	35134	VITVI02G01712,VITVI07G02548,VITVI01G00971,VITVI02G01315,VITVI04G00064,VITVI04G00554,VITVI04G00980,VITVI05G00254,VITVI05G01254,VITVI05G00033,VITVI06G00041,VITVI06G00651,VITVI06G00701,VITVI06G01491,VITVI06G04445,VITVI07G00923,VITVI07G01329,VITVI08G01709,VITVI08G01796,VITVI08G01037,VITVI09G00043,VITVI09G01927,VITVI09G04364,VITVI09G00980,VITVI10G00761,VITVI10G01883,VITVI11G00222,VITVI12G00155,VITVI12…
GO:CC	ribosome	GO:0005840	1.98996e-17	16.7012	426	925	50	35134	VITVI02G01712,VITVI07G02548,VITVI01G00971,VITVI02G01315,VITVI03G01190,VITVI04G00064,VITVI04G00554,VITVI04G02132,VITVI04G00980,VITVI05G00254,VITVI05G01254,VITVI05G00033,VITVI06G00032,VITVI06G00041,VITVI06G00651,VITVI06G00701,VITVI06G01491,VITVI06G04445,VITVI07G00923,VITVI07G00121,VITVI07G01501,VITVI07G01329,VITVI08G01709,VITVI08G01796,VITVI08G01037,VITVI09G00043,VITVI09G01927,VITVI09G04364,VITVI09…
GO:CC	small-subunit processome	GO:0032040	1.10523e-15	14.9565	47	925	18	35134	VITVI04G01298,VITVI05G01593,VITVI07G01162,VITVI08G01233,VITVI08G01588,VITVI08G01652,VITVI08G01971,VITVI10G00908,VITVI11G00452,VITVI12G00264,VITVI13G01540,VITVI14G00383,VITVI16G01514,VITVI16G00096,VITVI16G01083,VITVI17G00141,VITVI17G00840,VITVI18G00540
GO:CC	plastid	GO:0009536	2.43185e-15	14.6141	1086	925	80	35134	VITVI13G04636,VITVI01G00652,VITVI08G02419,VITVI04G01526,VITVI13G04616,VITVI01G01311,VITVI01G01457,VITVI01G00052,VITVI01G00156,VITVI01G00166,VITVI01G00800,VITVI01G00823,VITVI01G00681,VITVI01G01758,VITVI02G00950,VITVI03G00031,VITVI03G00485,VITVI03G00773,VITVI04G00098,VITVI04G00144,VITVI04G01183,VITVI04G01193,VITVI05G01660,VITVI05G01692,VITVI06G00032,VITVI06G00211,VITVI06G00234,VITVI06G00346,VITVI06…
GO:CC	chloroplast	GO:0009507	8.29387e-14	13.0812	1022	925	74	35134	VITVI01G00652,VITVI08G02419,VITVI04G01526,VITVI13G04616,VITVI01G01311,VITVI01G01457,VITVI01G00052,VITVI01G00156,VITVI01G00800,VITVI01G00823,VITVI01G00681,VITVI01G01758,VITVI02G00950,VITVI03G00031,VITVI03G00485,VITVI03G00773,VITVI04G00098,VITVI04G00144,VITVI04G01183,VITVI04G01193,VITVI05G01660,VITVI05G01692,VITVI06G00032,VITVI06G00211,VITVI06G00234,VITVI06G00346,VITVI06G00484,VITVI06G00510,VITVI06…
GO:CC	nucleus	GO:0005634	1.44562e-13	12.8399	4387	925	198	35134	VITVI07G01205,VITVI07G00078,VITVI10G04226,VITVI10G00387,VITVI04G01545,VITVI10G02201,VITVI10G04134,VITVI01G01620,VITVI01G00173,VITVI01G00245,VITVI01G00333,VITVI01G00355,VITVI01G00408,VITVI01G04125,VITVI01G04240,VITVI01G00599,VITVI01G00613,VITVI01G01815,VITVI02G00645,VITVI02G00660,VITVI02G00023,VITVI02G00111,VITVI02G00176,VITVI02G00187,VITVI02G00214,VITVI02G00341,VITVI02G01100,VITVI03G01189,VITVI03…
GO:CC	envelope	GO:0031975	1.16329e-12	11.9343	704	925	57	35134	VITVI01G00652,VITVI08G02419,VITVI01G01311,VITVI01G01457,VITVI01G01620,VITVI01G00052,VITVI01G00681,VITVI01G00613,VITVI02G00111,VITVI02G00274,VITVI02G00320,VITVI02G00950,VITVI03G00848,VITVI04G00125,VITVI04G00441,VITVI04G01193,VITVI05G01356,VITVI06G00346,VITVI06G00484,VITVI06G00510,VITVI06G00700,VITVI06G00822,VITVI07G01797,VITVI08G01027,VITVI08G00113,VITVI09G00319,VITVI09G00635,VITVI10G01563,VITVI11…
GO:CC	organelle envelope	GO:0031967	1.16329e-12	11.9343	704	925	57	35134	VITVI01G00652,VITVI08G02419,VITVI01G01311,VITVI01G01457,VITVI01G01620,VITVI01G00052,VITVI01G00681,VITVI01G00613,VITVI02G00111,VITVI02G00274,VITVI02G00320,VITVI02G00950,VITVI03G00848,VITVI04G00125,VITVI04G00441,VITVI04G01193,VITVI05G01356,VITVI06G00346,VITVI06G00484,VITVI06G00510,VITVI06G00700,VITVI06G00822,VITVI07G01797,VITVI08G01027,VITVI08G00113,VITVI09G00319,VITVI09G00635,VITVI10G01563,VITVI11…
GO:CC	cytosolic large ribosomal subunit	GO:0022625	1.24402e-11	10.9052	134	925	23	35134	VITVI02G01712,VITVI04G00064,VITVI05G00033,VITVI06G00041,VITVI07G00923,VITVI07G01329,VITVI08G01709,VITVI08G01037,VITVI09G01927,VITVI09G00980,VITVI10G00761,VITVI10G01883,VITVI11G00222,VITVI12G00155,VITVI12G00164,VITVI13G00718,VITVI14G00871,VITVI14G00151,VITVI14G01332,VITVI16G01711,VITVI16G01054,VITVI18G01625,VITVI19G01389
GO:CC	90S preribosome	GO:0030686	2.54686e-11	10.594	22	925	11	35134	VITVI04G01298,VITVI07G01162,VITVI08G01233,VITVI08G01588,VITVI09G00015,VITVI12G00029,VITVI13G01540,VITVI14G01703,VITVI14G01290,VITVI16G00096,VITVI17G00840
GO:CC	large ribosomal subunit	GO:0015934	2.54686e-11	10.594	166	925	25	35134	VITVI02G01712,VITVI07G02548,VITVI04G00064,VITVI05G00254,VITVI05G00033,VITVI06G00041,VITVI07G00923,VITVI07G01329,VITVI08G01709,VITVI08G01037,VITVI09G01927,VITVI09G00980,VITVI10G00761,VITVI10G01883,VITVI11G00222,VITVI12G00155,VITVI12G00164,VITVI13G00718,VITVI14G00871,VITVI14G00151,VITVI14G01332,VITVI16G01711,VITVI16G01054,VITVI18G01625,VITVI19G01389
GO:CC	endomembrane system	GO:0012505	1.15099e-09	8.93893	1455	925	82	35134	VITVI07G04489,VITVI02G00565,VITVI17G01311,VITVI01G01311,VITVI01G01372,VITVI01G01620,VITVI01G02268,VITVI01G00052,VITVI01G00613,VITVI01G01782,VITVI02G00645,VITVI02G00662,VITVI02G00111,VITVI02G00187,VITVI02G00221,VITVI03G00100,VITVI03G00344,VITVI03G00609,VITVI04G00039,VITVI04G00125,VITVI04G00465,VITVI04G01319,VITVI04G01014,VITVI04G01037,VITVI05G00321,VITVI05G01906,VITVI05G01356,VITVI05G01360,VITVI05…
GO:CC	cytosolic small ribosomal subunit	GO:0022627	1.36402e-08	7.86518	65	925	14	35134	VITVI01G00971,VITVI02G01315,VITVI04G00554,VITVI04G00980,VITVI05G01254,VITVI06G00701,VITVI06G01491,VITVI06G04445,VITVI08G01796,VITVI09G00043,VITVI09G04364,VITVI13G04080,VITVI13G04156,VITVI13G00106
GO:CC	nuclear protein-containing complex	GO:0140513	3.60984e-08	7.44251	755	925	50	35134	VITVI10G00387,VITVI01G01620,VITVI01G04125,VITVI01G00613,VITVI02G00111,VITVI03G00283,VITVI03G00286,VITVI03G00543,VITVI04G00125,VITVI04G01298,VITVI04G02028,VITVI05G00147,VITVI06G04198,VITVI06G00658,VITVI06G00833,VITVI06G01501,VITVI07G01892,VITVI07G00195,VITVI07G01162,VITVI08G01233,VITVI08G01511,VITVI08G01588,VITVI08G01729,VITVI08G01813,VITVI08G01871,VITVI08G02106,VITVI08G00039,VITVI08G00105,VITVI11…
GO:CC	small ribosomal subunit	GO:0015935	5.34349e-08	7.27218	97	925	16	35134	VITVI01G00971,VITVI02G01315,VITVI04G00554,VITVI04G00980,VITVI05G01254,VITVI06G00651,VITVI06G00701,VITVI06G01491,VITVI06G04445,VITVI08G01796,VITVI09G00043,VITVI09G04364,VITVI12G00178,VITVI13G04080,VITVI13G04156,VITVI13G00106
GO:CC	mitochondrial protein-containing complex	GO:0098798	1.16748e-07	6.93275	178	925	21	35134	VITVI07G02548,VITVI02G00274,VITVI03G00848,VITVI04G00441,VITVI05G00254,VITVI06G00510,VITVI06G00651,VITVI06G00700,VITVI06G00822,VITVI07G01797,VITVI09G01301,VITVI10G01883,VITVI11G00263,VITVI12G00178,VITVI12G00706,VITVI14G01545,VITVI14G04596,VITVI18G00338,VITVI19G01974,VITVI19G01702,VITVI19G00567
GO:CC	organelle membrane	GO:0031090	3.08162e-07	6.51122	1376	925	72	35134	VITVI07G04489,VITVI01G00652,VITVI08G02419,VITVI17G01311,VITVI01G01311,VITVI01G01457,VITVI01G00052,VITVI02G00662,VITVI02G00274,VITVI02G00320,VITVI02G00950,VITVI02G00554,VITVI03G00100,VITVI03G00344,VITVI03G00609,VITVI03G00848,VITVI04G00039,VITVI04G00441,VITVI05G00321,VITVI05G01360,VITVI05G01545,VITVI05G01381,VITVI06G00213,VITVI06G00484,VITVI06G00510,VITVI06G00669,VITVI06G00700,VITVI06G00822,VITVI07…
GO:CC	chloroplast envelope	GO:0009941	1.30374e-06	5.88481	205	925	21	35134	VITVI08G02419,VITVI01G01311,VITVI01G01457,VITVI01G00052,VITVI01G00681,VITVI02G00950,VITVI04G01193,VITVI06G00510,VITVI08G00113,VITVI09G00319,VITVI09G00635,VITVI10G01563,VITVI14G00614,VITVI15G00148,VITVI16G00033,VITVI18G00338,VITVI18G00349,VITVI18G00887,VITVI19G00207,VITVI19G01702,VITVI19G00569
GO:CC	translation preinitiation complex	GO:0070993	4.44382e-06	5.35224	20	925	7	35134	VITVI10G02255,VITVI01G00572,VITVI04G00640,VITVI06G00696,VITVI13G00101,VITVI14G00132,VITVI14G01385
GO:CC	chaperonin-containing T-complex	GO:0005832	4.44382e-06	5.35224	13	925	6	35134	VITVI15G04488,VITVI01G00594,VITVI07G02050,VITVI08G01818,VITVI14G01224,VITVI15G00614
GO:CC	eukaryotic 48S preinitiation complex	GO:0033290	4.44382e-06	5.35224	20	925	7	35134	VITVI10G02255,VITVI01G00572,VITVI04G00640,VITVI06G00696,VITVI13G00101,VITVI14G00132,VITVI14G01385
GO:CC	plastid stroma	GO:0009532	5.12265e-06	5.29051	205	925	20	35134	VITVI13G04636,VITVI01G01311,VITVI01G00166,VITVI01G00681,VITVI01G01758,VITVI03G00773,VITVI04G00144,VITVI04G01193,VITVI05G01692,VITVI06G00032,VITVI06G00346,VITVI07G00128,VITVI09G00794,VITVI10G01476,VITVI12G00115,VITVI16G00280,VITVI16G01182,VITVI17G00155,VITVI18G00338,VITVI19G00569
GO:CC	catalytic complex	GO:1902494	5.83166e-06	5.23421	1161	925	60	35134	VITVI13G04636,VITVI10G00387,VITVI01G01563,VITVI01G00166,VITVI01G04125,VITVI02G00176,VITVI03G00283,VITVI03G00331,VITVI03G00543,VITVI04G00039,VITVI04G00235,VITVI04G00265,VITVI04G00376,VITVI04G00414,VITVI04G00441,VITVI04G01193,VITVI04G02028,VITVI04G01689,VITVI05G00396,VITVI05G01465,VITVI06G00574,VITVI06G00822,VITVI06G01501,VITVI07G00362,VITVI07G00622,VITVI07G01892,VITVI07G01033,VITVI07G00195,VITVI07…
GO:CC	mitochondrial membrane	GO:0031966	7.99424e-06	5.09722	270	925	23	35134	VITVI02G00274,VITVI02G00320,VITVI03G00848,VITVI04G00441,VITVI06G00510,VITVI06G00700,VITVI06G00822,VITVI07G01797,VITVI11G00263,VITVI12G00642,VITVI12G00706,VITVI14G01545,VITVI14G00251,VITVI14G04596,VITVI14G02991,VITVI15G00862,VITVI17G00124,VITVI18G00338,VITVI19G01974,VITVI19G00767,VITVI19G01702,VITVI19G01725,VITVI19G00567
GO:CC	mitochondrial matrix	GO:0005759	9.08419e-06	5.04171	109	925	14	35134	VITVI07G02548,VITVI05G00254,VITVI06G00651,VITVI09G00521,VITVI09G01301,VITVI10G01883,VITVI12G00178,VITVI13G00354,VITVI14G00096,VITVI15G00492,VITVI16G01413,VITVI17G01403,VITVI18G00338,VITVI19G00567
GO:CC	mitochondrial envelope	GO:0005740	1.26477e-05	4.89799	278	925	23	35134	VITVI02G00274,VITVI02G00320,VITVI03G00848,VITVI04G00441,VITVI06G00510,VITVI06G00700,VITVI06G00822,VITVI07G01797,VITVI11G00263,VITVI12G00642,VITVI12G00706,VITVI14G01545,VITVI14G00251,VITVI14G04596,VITVI14G02991,VITVI15G00862,VITVI17G00124,VITVI18G00338,VITVI19G01974,VITVI19G00767,VITVI19G01702,VITVI19G01725,VITVI19G00567
GO:CC	preribosome, large subunit precursor	GO:0030687	1.58337e-05	4.80042	24	925	7	35134	VITVI07G01999,VITVI08G00640,VITVI12G01799,VITVI14G01703,VITVI14G01405,VITVI15G01001,VITVI17G00910
GO:CC	plastid envelope	GO:0009526	1.58517e-05	4.79992	346	925	26	35134	VITVI01G00652,VITVI08G02419,VITVI01G01311,VITVI01G01457,VITVI01G00052,VITVI01G00681,VITVI02G00950,VITVI04G01193,VITVI06G00346,VITVI06G00484,VITVI06G00510,VITVI08G01027,VITVI08G00113,VITVI09G00319,VITVI09G00635,VITVI10G01563,VITVI12G00184,VITVI14G00614,VITVI15G00148,VITVI16G00033,VITVI18G00338,VITVI18G00349,VITVI18G00887,VITVI19G00207,VITVI19G01702,VITVI19G00569
GO:CC	protein folding chaperone complex	GO:0101031	3.51611e-05	4.45394	18	925	6	35134	VITVI15G04488,VITVI01G00594,VITVI07G02050,VITVI08G01818,VITVI14G01224,VITVI15G00614
GO:CC	box C/D RNP complex	GO:0031428	5.10114e-05	4.29233	6	925	4	35134	VITVI11G00452,VITVI14G00383,VITVI16G01083,VITVI17G00141
GO:CC	sno(s)RNA-containing ribonucleoprotein complex	GO:0005732	9.23638e-05	4.0345	21	925	6	35134	VITVI08G01813,VITVI11G00452,VITVI14G00383,VITVI16G01083,VITVI17G00141,VITVI17G00840
GO:CC	chloroplast stroma	GO:0009570	0.000119466	3.92276	194	925	17	35134	VITVI01G01311,VITVI01G00681,VITVI01G01758,VITVI03G00773,VITVI04G00144,VITVI04G01193,VITVI05G01692,VITVI06G00032,VITVI06G00346,VITVI07G00128,VITVI09G00794,VITVI10G01476,VITVI12G00115,VITVI16G00280,VITVI16G01182,VITVI18G00338,VITVI19G00569
GO:CC	multi-eIF complex	GO:0043614	0.000127678	3.89388	3	925	3	35134	VITVI06G00696,VITVI13G00101,VITVI14G00132
GO:CC	mitochondrial inner membrane	GO:0005743	0.000166428	3.77877	220	925	18	35134	VITVI02G00274,VITVI02G00320,VITVI04G00441,VITVI06G00700,VITVI06G00822,VITVI07G01797,VITVI11G00263,VITVI12G00642,VITVI12G00706,VITVI14G04596,VITVI14G02991,VITVI15G00862,VITVI18G00338,VITVI19G01974,VITVI19G00767,VITVI19G01702,VITVI19G01725,VITVI19G00567
GO:CC	organelle inner membrane	GO:0019866	0.000180651	3.74316	264	925	20	35134	VITVI08G02419,VITVI02G00274,VITVI02G00320,VITVI04G00441,VITVI06G00700,VITVI06G00822,VITVI07G01797,VITVI11G00263,VITVI12G00642,VITVI12G00706,VITVI14G04596,VITVI14G02991,VITVI15G00148,VITVI15G00862,VITVI18G00338,VITVI19G01974,VITVI19G00767,VITVI19G01702,VITVI19G01725,VITVI19G00567
GO:CC	endoplasmic reticulum	GO:0005783	0.000248	3.60555	607	925	34	35134	VITVI17G01311,VITVI01G01311,VITVI01G01372,VITVI01G02268,VITVI01G01782,VITVI02G00645,VITVI02G00187,VITVI03G00100,VITVI03G00344,VITVI03G00609,VITVI04G00039,VITVI04G01014,VITVI05G01906,VITVI05G01360,VITVI05G01545,VITVI06G00213,VITVI07G00429,VITVI07G04151,VITVI07G00622,VITVI07G00903,VITVI07G01033,VITVI08G00904,VITVI08G01049,VITVI09G00876,VITVI12G00453,VITVI13G00602,VITVI14G00111,VITVI14G01999,VITVI15…
GO:CC	nuclear envelope	GO:0005635	0.000328663	3.48325	97	925	11	35134	VITVI01G01620,VITVI01G00613,VITVI02G00111,VITVI04G00125,VITVI05G01356,VITVI11G00787,VITVI12G02018,VITVI12G02023,VITVI12G01613,VITVI14G04569,VITVI15G00613
GO:CC	Golgi apparatus	GO:0005794	0.000348238	3.45812	671	925	36	35134	VITVI07G04489,VITVI02G00565,VITVI01G01372,VITVI01G00052,VITVI02G00662,VITVI02G00221,VITVI03G00344,VITVI04G00465,VITVI05G00321,VITVI05G01906,VITVI05G01360,VITVI05G01381,VITVI06G00483,VITVI06G00669,VITVI07G00378,VITVI07G00429,VITVI07G00464,VITVI07G01692,VITVI07G00088,VITVI08G01897,VITVI08G00771,VITVI09G00068,VITVI10G00487,VITVI10G01065,VITVI11G00331,VITVI12G00178,VITVI12G01808,VITVI13G00018,VITVI14…
GO:CC	membrane protein complex	GO:0098796	0.000433428	3.36308	523	925	30	35134	VITVI03G00344,VITVI03G00848,VITVI04G00039,VITVI04G00376,VITVI04G00441,VITVI04G01319,VITVI04G01037,VITVI04G01689,VITVI05G01381,VITVI06G00510,VITVI06G00669,VITVI06G00700,VITVI06G00822,VITVI07G00622,VITVI07G01797,VITVI07G01033,VITVI10G01065,VITVI11G00263,VITVI12G00706,VITVI13G01222,VITVI13G00018,VITVI13G01924,VITVI14G01545,VITVI14G01999,VITVI14G04596,VITVI18G00338,VITVI18G01157,VITVI19G01974,VITVI19…
GO:CC	Ycf2/FtsHi complex	GO:0062091	0.000436057	3.36046	4	925	3	35134	VITVI09G00319,VITVI15G00148,VITVI19G01702
GO:CC	eukaryotic translation initiation factor 3 complex, eIF3m	GO:0071541	0.000436057	3.36046	4	925	3	35134	VITVI01G00572,VITVI14G00132,VITVI14G01385
GO:CC	endoplasmic reticulum lumen	GO:0005788	0.000477223	3.32128	18	925	5	35134	VITVI02G00187,VITVI05G01545,VITVI08G01049,VITVI12G00453,VITVI13G00602
GO:CC	eukaryotic 43S preinitiation complex	GO:0016282	0.000477223	3.32128	18	925	5	35134	VITVI10G02255,VITVI01G00572,VITVI04G00640,VITVI14G00132,VITVI14G01385
GO:CC	membrane	GO:0016020	0.000570757	3.24355	9855	925	311	35134	VITVI10G01219,VITVI10G00217,VITVI07G04489,VITVI07G01405,VITVI07G01247,VITVI01G00652,VITVI07G04463,VITVI02G00565,VITVI08G02419,VITVI17G01311,VITVI00G04504,VITVI00G04505,VITVI10G00275,VITVI13G04616,VITVI00G04799,VITVI01G01311,VITVI01G01372,VITVI01G01376,VITVI01G01457,VITVI01G01563,VITVI01G01620,VITVI01G02268,VITVI01G02278,VITVI01G00052,VITVI01G01902,VITVI01G00355,VITVI01G00382,VITVI01G00408,VITVI01…
GO:CC	spliceosomal complex	GO:0005681	0.000634243	3.19774	143	925	13	35134	VITVI10G00387,VITVI01G04125,VITVI05G00147,VITVI06G04198,VITVI06G00658,VITVI06G01501,VITVI08G00039,VITVI11G00170,VITVI11G00452,VITVI11G00595,VITVI15G01262,VITVI18G00151,VITVI18G00035
GO:CC	nuclear exosome (RNase complex)	GO:0000176	0.000768636	3.11428	11	925	4	35134	VITVI04G02028,VITVI07G01892,VITVI07G00195,VITVI12G00367
GO:CC	Golgi apparatus subcompartment	GO:0098791	0.000968532	3.01389	130	925	12	35134	VITVI02G00565,VITVI02G00221,VITVI04G00465,VITVI05G00321,VITVI05G01360,VITVI07G00088,VITVI08G01897,VITVI10G00487,VITVI12G00178,VITVI14G00238,VITVI15G00733,VITVI18G00960
GO:CC	eukaryotic translation initiation factor 3 complex	GO:0005852	0.000984517	3.00678	21	925	5	35134	VITVI10G02255,VITVI01G00572,VITVI04G00640,VITVI14G00132,VITVI14G01385
GO:CC	trans-Golgi network	GO:0005802	0.00108856	2.96315	113	925	11	35134	VITVI02G00565,VITVI02G00221,VITVI04G00465,VITVI05G00321,VITVI07G00088,VITVI08G01897,VITVI10G00487,VITVI12G00178,VITVI14G00238,VITVI15G00733,VITVI18G00960
GO:CC	nuclear pore	GO:0005643	0.00143725	2.84247	64	925	8	35134	VITVI01G01620,VITVI01G00613,VITVI02G00111,VITVI04G00125,VITVI11G00787,VITVI12G01613,VITVI14G04569,VITVI15G00613
GO:CC	organelle subcompartment	GO:0031984	0.00151752	2.81886	438	925	25	35134	VITVI02G00565,VITVI17G01311,VITVI02G00221,VITVI03G00100,VITVI03G00609,VITVI04G00039,VITVI04G00465,VITVI05G00321,VITVI05G01360,VITVI05G01545,VITVI06G00213,VITVI07G00429,VITVI07G00622,VITVI07G01033,VITVI07G00088,VITVI08G01897,VITVI10G00487,VITVI12G00178,VITVI14G01999,VITVI14G00238,VITVI15G00733,VITVI15G00764,VITVI18G00960,VITVI19G00058,VITVI19G01359
GO:CC	endoplasmic reticulum chaperone complex	GO:0034663	0.00175566	2.75556	6	925	3	35134	VITVI02G00187,VITVI04G01014,VITVI09G00876
GO:CC	Pwp2p-containing subcomplex of 90S preribosome	GO:0034388	0.00175566	2.75556	6	925	3	35134	VITVI07G01162,VITVI08G01233,VITVI08G01588
GO:CC	perinuclear region of cytoplasm	GO:0048471	0.0019554	2.70877	14	925	4	35134	VITVI10G00217,VITVI01G01311,VITVI13G01416,VITVI19G02080
GO:CC	inner mitochondrial membrane protein complex	GO:0098800	0.00195554	2.70873	122	925	11	35134	VITVI04G00441,VITVI06G00700,VITVI06G00822,VITVI07G01797,VITVI11G00263,VITVI12G00706,VITVI14G04596,VITVI18G00338,VITVI19G01974,VITVI19G01702,VITVI19G00567
GO:CC	exosome (RNase complex)	GO:0000178	0.00425211	2.3714	17	925	4	35134	VITVI04G02028,VITVI07G01892,VITVI07G00195,VITVI12G00367
GO:CC	bounding membrane of organelle	GO:0098588	0.00484721	2.31451	783	925	36	35134	VITVI07G04489,VITVI01G00652,VITVI01G01311,VITVI01G01457,VITVI02G00662,VITVI02G00950,VITVI02G00554,VITVI03G00344,VITVI03G00848,VITVI05G00321,VITVI05G01381,VITVI06G00484,VITVI06G00510,VITVI06G00669,VITVI07G00429,VITVI07G01692,VITVI08G01027,VITVI09G00635,VITVI10G01065,VITVI10G01563,VITVI12G00099,VITVI12G00184,VITVI13G01222,VITVI13G00018,VITVI14G00696,VITVI14G01545,VITVI14G01999,VITVI14G00251,VITVI15…
GO:CC	exoribonuclease complex	GO:1905354	0.00515291	2.28795	18	925	4	35134	VITVI04G02028,VITVI07G01892,VITVI07G00195,VITVI12G00367
GO:CC	TIM23 mitochondrial import inner membrane translocase complex	GO:0005744	0.00515291	2.28795	18	925	4	35134	VITVI11G00263,VITVI12G00706,VITVI18G00338,VITVI19G00567
GO:CC	intracellular protein-containing complex	GO:0140535	0.00532162	2.27396	591	925	29	35134	VITVI15G04488,VITVI01G00594,VITVI02G00176,VITVI03G00543,VITVI04G00039,VITVI04G00265,VITVI04G00414,VITVI05G00396,VITVI05G00818,VITVI05G01465,VITVI07G01605,VITVI07G02050,VITVI08G01212,VITVI08G01464,VITVI08G01818,VITVI08G01871,VITVI09G00969,VITVI11G00095,VITVI11G00921,VITVI12G00115,VITVI12G00264,VITVI13G01959,VITVI13G00975,VITVI14G01224,VITVI14G04569,VITVI15G00614,VITVI17G00155,VITVI17G00730,VITVI18…
GO:CC	mitochondrial ribosome	GO:0005761	0.00744205	2.12831	33	925	5	35134	VITVI07G02548,VITVI05G00254,VITVI06G00651,VITVI10G01883,VITVI12G00178
GO:CC	late endosome membrane	GO:0031902	0.008279	2.08202	10	925	3	35134	VITVI13G01222,VITVI14G01999,VITVI18G01157
GO:CC	mitochondrial outer membrane translocase complex	GO:0005742	0.008279	2.08202	10	925	3	35134	VITVI03G00848,VITVI06G00510,VITVI14G01545
GO:CC	organellar ribosome	GO:0000313	0.008279	2.08202	34	925	5	35134	VITVI07G02548,VITVI05G00254,VITVI06G00651,VITVI10G01883,VITVI12G00178
GO:CC	preribosome, small subunit precursor	GO:0030688	0.008279	2.08202	10	925	3	35134	VITVI02G00341,VITVI09G00015,VITVI18G00099
GO:CC	outer mitochondrial membrane protein complex	GO:0098799	0.008279	2.08202	10	925	3	35134	VITVI03G00848,VITVI06G00510,VITVI14G01545
GO:CC	catalytic step 2 spliceosome	GO:0071013	0.00835776	2.07791	50	925	6	35134	VITVI10G00387,VITVI01G04125,VITVI06G01501,VITVI08G00039,VITVI11G00595,VITVI15G01262
GO:CC	UTP-C complex	GO:0034456	0.00840755	2.07533	3	925	2	35134	VITVI04G01298,VITVI14G01290
GO:CC	CURI complex	GO:0032545	0.00840755	2.07533	3	925	2	35134	VITVI04G01298,VITVI14G01290
GO:CC	Mpp10 complex	GO:0034457	0.00840755	2.07533	3	925	2	35134	VITVI13G01540,VITVI17G00840
GO:CC	U2-type catalytic step 2 spliceosome	GO:0071007	0.00840755	2.07533	3	925	2	35134	VITVI10G00387,VITVI11G00595
GO:CC	mitochondrial outer membrane	GO:0005741	0.00859501	2.06575	35	925	5	35134	VITVI03G00848,VITVI06G00510,VITVI14G01545,VITVI14G00251,VITVI17G00124
GO:CC	plastid membrane	GO:0042170	0.00932943	2.03014	270	925	16	35134	VITVI01G00652,VITVI08G02419,VITVI01G01457,VITVI01G00052,VITVI02G00950,VITVI06G00484,VITVI06G00510,VITVI08G01027,VITVI08G00113,VITVI09G00635,VITVI10G01563,VITVI12G00184,VITVI14G00614,VITVI15G00148,VITVI18G00349,VITVI19G01702
GO:CC	organelle outer membrane	GO:0031968	0.012127	1.91625	228	925	14	35134	VITVI01G00652,VITVI01G01457,VITVI02G00950,VITVI03G00848,VITVI06G00484,VITVI06G00510,VITVI08G01027,VITVI09G00635,VITVI10G01563,VITVI12G00184,VITVI14G01545,VITVI14G00251,VITVI17G00124,VITVI18G00349
GO:CC	outer membrane	GO:0019867	0.012127	1.91625	228	925	14	35134	VITVI01G00652,VITVI01G01457,VITVI02G00950,VITVI03G00848,VITVI06G00484,VITVI06G00510,VITVI08G01027,VITVI09G00635,VITVI10G01563,VITVI12G00184,VITVI14G01545,VITVI14G00251,VITVI17G00124,VITVI18G00349
GO:CC	respiratory chain complex III	GO:0045275	0.0129545	1.88758	12	925	3	35134	VITVI04G00441,VITVI06G00822,VITVI14G04596
GO:CC	mitochondrial respiratory chain complex III	GO:0005750	0.0129545	1.88758	12	925	3	35134	VITVI04G00441,VITVI06G00822,VITVI14G04596
GO:CC	Cajal body	GO:0015030	0.0153531	1.8138	4	925	2	35134	VITVI01G01815,VITVI16G01083
GO:CC	plastid thylakoid	GO:0031976	0.0243908	1.61277	199	925	12	35134	VITVI01G00652,VITVI01G01457,VITVI04G00098,VITVI06G00484,VITVI07G00465,VITVI08G01027,VITVI09G00319,VITVI09G00635,VITVI10G01563,VITVI12G00184,VITVI15G00148,VITVI18G00349
GO:CC	precatalytic spliceosome	GO:0071011	0.0243908	1.61277	29	925	4	35134	VITVI01G04125,VITVI06G00658,VITVI11G00452,VITVI15G01262
GO:CC	cytochrome complex	GO:0070069	0.0243908	1.61277	29	925	4	35134	VITVI04G00441,VITVI06G00822,VITVI13G01924,VITVI14G04596
GO:CC	nuclear pore central transport channel	GO:0044613	0.0243908	1.61277	5	925	2	35134	VITVI01G01620,VITVI15G00613
GO:CC	chloroplast thylakoid	GO:0009534	0.0243908	1.61277	199	925	12	35134	VITVI01G00652,VITVI01G01457,VITVI04G00098,VITVI06G00484,VITVI07G00465,VITVI08G01027,VITVI09G00319,VITVI09G00635,VITVI10G01563,VITVI12G00184,VITVI15G00148,VITVI18G00349
GO:CC	eukaryotic translation initiation factor 2 complex	GO:0005850	0.0243908	1.61277	5	925	2	35134	VITVI06G00696,VITVI13G00101
GO:CC	thylakoid	GO:0009579	0.024512	1.61062	276	925	15	35134	VITVI01G00652,VITVI01G01457,VITVI04G00098,VITVI04G00376,VITVI06G00484,VITVI07G00465,VITVI08G01027,VITVI09G00319,VITVI09G00635,VITVI10G01476,VITVI10G01563,VITVI12G00184,VITVI15G00148,VITVI16G00280,VITVI18G00349
GO:CC	cytoplasmic vesicle	GO:0031410	0.028872	1.53952	363	925	18	35134	VITVI02G00565,VITVI02G00221,VITVI03G00344,VITVI05G00321,VITVI05G01381,VITVI06G00669,VITVI10G00487,VITVI10G01065,VITVI12G00178,VITVI13G00678,VITVI13G01222,VITVI14G01658,VITVI14G01999,VITVI14G00238,VITVI16G01083,VITVI18G00382,VITVI18G00960,VITVI18G01157
GO:CC	intracellular vesicle	GO:0097708	0.028872	1.53952	363	925	18	35134	VITVI02G00565,VITVI02G00221,VITVI03G00344,VITVI05G00321,VITVI05G01381,VITVI06G00669,VITVI10G00487,VITVI10G01065,VITVI12G00178,VITVI13G00678,VITVI13G01222,VITVI14G01658,VITVI14G01999,VITVI14G00238,VITVI16G01083,VITVI18G00382,VITVI18G00960,VITVI18G01157
GO:CC	endosome	GO:0005768	0.0289929	1.53771	230	925	13	35134	VITVI02G00565,VITVI02G00221,VITVI05G00321,VITVI05G01381,VITVI10G00487,VITVI12G00178,VITVI13G01222,VITVI14G01658,VITVI14G01999,VITVI14G00238,VITVI16G01083,VITVI18G00960,VITVI18G01157
GO:CC	chloroplast membrane	GO:0031969	0.031585	1.50052	111	925	8	35134	VITVI08G02419,VITVI01G00052,VITVI02G00950,VITVI06G00510,VITVI08G00113,VITVI14G00614,VITVI15G00148,VITVI19G01702
GO:CC	PAM complex, Tim23 associated import motor	GO:0001405	0.033051	1.48081	6	925	2	35134	VITVI18G00338,VITVI19G00567
GO:CC	endoplasmic reticulum protein-containing complex	GO:0140534	0.0345524	1.46152	91	925	7	35134	VITVI02G00187,VITVI04G00039,VITVI04G01014,VITVI07G00622,VITVI07G01033,VITVI09G00876,VITVI17G00132
GO:CC	Sm-like protein family complex	GO:0120114	0.0345524	1.46152	70	925	6	35134	VITVI01G04125,VITVI06G00658,VITVI08G01822,VITVI11G00452,VITVI11G00595,VITVI15G01262
GO:CC	cortical microtubule cytoskeleton	GO:0030981	0.0360965	1.44254	18	925	3	35134	VITVI08G01357,VITVI16G04495,VITVI17G00489
GO:CC	mRNA cleavage factor complex	GO:0005849	0.0360965	1.44254	18	925	3	35134	VITVI08G01511,VITVI14G01896,VITVI15G01169
GO:CC	cortical microtubule	GO:0055028	0.0360965	1.44254	18	925	3	35134	VITVI08G01357,VITVI16G04495,VITVI17G00489
GO:CC	organellar large ribosomal subunit	GO:0000315	0.0406368	1.39108	19	925	3	35134	VITVI07G02548,VITVI05G00254,VITVI10G01883
GO:CC	plastid nucleoid	GO:0042646	0.0406368	1.39108	19	925	3	35134	VITVI10G01476,VITVI16G00280,VITVI17G00155
GO:CC	cortical cytoskeleton	GO:0030863	0.0406368	1.39108	19	925	3	35134	VITVI08G01357,VITVI16G04495,VITVI17G00489
GO:CC	mitochondrial large ribosomal subunit	GO:0005762	0.0406368	1.39108	19	925	3	35134	VITVI07G02548,VITVI05G00254,VITVI10G01883
GO:CC	cortical microtubule, transverse to long axis	GO:0010005	0.0417105	1.37975	7	925	2	35134	VITVI16G04495,VITVI17G00489
GO:CC	spliceosomal tri-snRNP complex	GO:0097526	0.0447682	1.34903	36	925	4	35134	VITVI01G04125,VITVI11G00452,VITVI11G00595,VITVI15G01262
KEGG	KEGG root term	KEGG:00000	4.68283e-33	32.3295	2608	925	183	35134	VITVI10G00217,VITVI07G01247,VITVI17G01311,VITVI07G02548,VITVI01G01311,VITVI01G01563,VITVI01G01564,VITVI01G01588,VITVI01G00355,VITVI01G00971,VITVI01G01762,VITVI01G01782,VITVI01G01815,VITVI01G01758,VITVI02G00729,VITVI02G00111,VITVI02G00176,VITVI02G00187,VITVI02G00341,VITVI03G01190,VITVI03G00185,VITVI03G00452,VITVI03G00331,VITVI03G00721,VITVI03G00773,VITVI03G00609,VITVI03G00543,VITVI04G00039,VITVI04…
KEGG	Ribosome biogenesis in eukaryotes	KEGG:03008	4.41258e-14	13.3553	46	925	17	35134	VITVI02G00341,VITVI04G01298,VITVI07G00226,VITVI07G01605,VITVI08G01233,VITVI08G01588,VITVI08G01813,VITVI11G04093,VITVI11G00452,VITVI13G01540,VITVI14G00383,VITVI14G01290,VITVI16G00155,VITVI16G01083,VITVI17G00111,VITVI17G00141,VITVI17G00840
KEGG	Protein processing in endoplasmic reticulum	KEGG:04141	1.08525e-11	10.9645	141	925	24	35134	VITVI10G00217,VITVI17G01311,VITVI01G01311,VITVI02G00187,VITVI04G00039,VITVI05G01545,VITVI06G00696,VITVI07G00394,VITVI07G00622,VITVI08G01049,VITVI09G00045,VITVI11G00331,VITVI12G00453,VITVI13G02014,VITVI13G00405,VITVI13G00409,VITVI13G00410,VITVI13G00491,VITVI13G00602,VITVI13G00101,VITVI16G00681,VITVI17G00287,VITVI17G01164,VITVI19G02080
KEGG	Ribosome	KEGG:03010	4.54931e-11	10.3421	166	925	25	35134	VITVI07G02548,VITVI01G00971,VITVI03G01190,VITVI04G00554,VITVI04G00980,VITVI05G01254,VITVI06G00041,VITVI06G04445,VITVI07G00923,VITVI07G01501,VITVI08G01709,VITVI08G01037,VITVI09G00043,VITVI09G01927,VITVI09G00980,VITVI10G00761,VITVI12G00178,VITVI13G00718,VITVI14G00871,VITVI14G00151,VITVI15G00516,VITVI16G01711,VITVI16G01054,VITVI18G01625,VITVI19G01389
KEGG	Metabolic pathways	KEGG:01100	9.37669e-06	5.02795	1235	925	63	35134	VITVI07G01247,VITVI01G01563,VITVI01G01564,VITVI01G01782,VITVI01G01758,VITVI02G00729,VITVI03G00185,VITVI03G00773,VITVI03G00609,VITVI04G00144,VITVI04G00313,VITVI04G00441,VITVI04G00597,VITVI04G01183,VITVI04G01193,VITVI04G01319,VITVI04G02037,VITVI04G00860,VITVI04G00880,VITVI05G01360,VITVI05G00043,VITVI05G01660,VITVI06G00346,VITVI07G00285,VITVI07G00362,VITVI07G00622,VITVI07G00047,VITVI08G01672,VITVI08…
KEGG	Biosynthesis of secondary metabolites	KEGG:01110	8.76232e-05	4.05738	681	925	39	35134	VITVI07G01247,VITVI01G01564,VITVI01G01782,VITVI01G01758,VITVI02G00729,VITVI03G00185,VITVI03G00773,VITVI04G00313,VITVI04G01183,VITVI04G01193,VITVI04G02037,VITVI04G00860,VITVI05G01660,VITVI06G00346,VITVI07G00362,VITVI07G00047,VITVI08G01672,VITVI08G01676,VITVI08G01085,VITVI09G00719,VITVI09G00794,VITVI09G01301,VITVI09G01400,VITVI11G01210,VITVI11G00949,VITVI12G02141,VITVI12G00767,VITVI14G02043,VITVI15…
KEGG	Biosynthesis of amino acids	KEGG:01230	0.000542873	3.2653	131	925	13	35134	VITVI07G01247,VITVI01G01758,VITVI03G00773,VITVI04G00860,VITVI05G01660,VITVI06G00346,VITVI07G00047,VITVI08G01672,VITVI08G01085,VITVI09G00719,VITVI09G00794,VITVI15G00445,VITVI16G01182
KEGG	Biosynthesis of cofactors	KEGG:01240	0.000601736	3.22059	134	925	13	35134	VITVI01G01564,VITVI04G00313,VITVI04G01183,VITVI04G01319,VITVI08G01676,VITVI10G00753,VITVI10G01564,VITVI12G00071,VITVI13G01485,VITVI15G00440,VITVI16G01509,VITVI17G01038,VITVI19G00767
KEGG	Pyruvate metabolism	KEGG:00620	0.000656663	3.18266	53	925	8	35134	VITVI04G01193,VITVI04G02037,VITVI07G00362,VITVI08G00993,VITVI09G01301,VITVI14G02043,VITVI16G01182,VITVI17G00607
KEGG	Lysine biosynthesis	KEGG:00300	0.00148605	2.82797	5	925	3	35134	VITVI01G01758,VITVI03G00773,VITVI08G01085
KEGG	Aminoacyl-tRNA biosynthesis	KEGG:00970	0.00152658	2.81628	33	925	6	35134	VITVI03G00331,VITVI04G00265,VITVI12G00115,VITVI12G00283,VITVI15G00533,VITVI17G00022
KEGG	Nucleocytoplasmic transport	KEGG:03013	0.0022615	2.6456	50	925	7	35134	VITVI02G00111,VITVI05G01356,VITVI11G04093,VITVI11G00787,VITVI12G01613,VITVI15G00613,VITVI16G00155
KEGG	Spliceosome	KEGG:03040	0.0024103	2.61793	84	925	9	35134	VITVI01G01815,VITVI06G00658,VITVI11G00452,VITVI11G00595,VITVI15G01262,VITVI17G00287,VITVI17G01512,VITVI18G00035,VITVI19G00131
KEGG	2-Oxocarboxylic acid metabolism	KEGG:01210	0.00451221	2.34561	28	925	5	35134	VITVI07G01247,VITVI01G01758,VITVI04G00860,VITVI05G01660,VITVI09G00794
KEGG	Citrate cycle (TCA cycle)	KEGG:00020	0.00584685	2.23308	30	925	5	35134	VITVI04G02037,VITVI04G00860,VITVI07G00362,VITVI09G01301,VITVI17G00607
KEGG	RNA degradation	KEGG:03018	0.00744593	2.12808	47	925	6	35134	VITVI06G00032,VITVI06G01524,VITVI07G01705,VITVI07G01892,VITVI07G00195,VITVI09G00969
KEGG	Purine metabolism	KEGG:00230	0.0135605	1.86772	37	925	5	35134	VITVI01G01563,VITVI01G01564,VITVI15G00445,VITVI17G01038,VITVI18G01542
KEGG	Phagosome	KEGG:04145	0.0195543	1.70876	58	925	6	35134	VITVI17G01311,VITVI03G00721,VITVI05G01545,VITVI06G00051,VITVI06G01847,VITVI18G00590
KEGG	Steroid biosynthesis	KEGG:00100	0.0201197	1.69638	26	925	4	35134	VITVI01G01782,VITVI03G00185,VITVI09G01400,VITVI11G00949
KEGG	Carbon metabolism	KEGG:01200	0.0209302	1.67923	144	925	10	35134	VITVI04G00597,VITVI04G01193,VITVI04G02037,VITVI04G00860,VITVI07G00362,VITVI09G01301,VITVI14G02043,VITVI15G00445,VITVI16G01182,VITVI17G00607
KEGG	Ubiquinone and other terpenoid-quinone biosynthesis	KEGG:00130	0.0209302	1.67923	27	925	4	35134	VITVI04G00313,VITVI12G00071,VITVI16G01509,VITVI17G00148
KEGG	Peroxisome	KEGG:04146	0.0224515	1.64875	44	925	5	35134	VITVI04G00860,VITVI10G01476,VITVI14G00696,VITVI15G00764,VITVI16G00280
KEGG	C5-Branched dibasic acid metabolism	KEGG:00660	0.0242712	1.61491	5	925	2	35134	VITVI07G01247,VITVI05G01660
KEGG	Sulfur relay system	KEGG:04122	0.0471628	1.3264	7	925	2	35134	VITVI19G01681,VITVI19G00551

## Sheet: K3_GOterm
Source	Term Name	Term ID	Adjusted P Value	Negative log10 of Adjusted P Value	Term Size	Query Size	Intersection Size	Effective Domain Size	Intersections
GO:MF	molecular_function	GO:0003674	2.239e-11	10.6499	21589	446	348	35134	VITVI10G01207,VITVI07G00060,VITVI10G00223,VITVI15G04473,VITVI07G01255,VITVI02G00564,VITVI16G01246,VITVI10G00245,VITVI10G00462,VITVI02G01721,VITVI04G02280,VITVI15G04507,VITVI10G04301,VITVI07G03056,VITVI07G01381,VITVI07G01423,VITVI00G04835,VITVI00G04866,VITVI01G04336,VITVI01G01400,VITVI01G01496,VITVI01G01682,VITVI01G00039,VITVI01G00066,VITVI01G00303,VITVI01G01995,VITVI01G00521,VITVI01G00541,VITVI01…
GO:MF	binding	GO:0005488	2.4196e-06	5.61626	15172	446	252	35134	VITVI10G01207,VITVI07G00060,VITVI10G00223,VITVI15G04473,VITVI02G00564,VITVI16G01246,VITVI10G00245,VITVI02G01721,VITVI04G02280,VITVI15G04507,VITVI10G04301,VITVI07G03056,VITVI07G01423,VITVI00G04835,VITVI01G01400,VITVI01G01496,VITVI01G01682,VITVI01G00303,VITVI01G01995,VITVI01G00521,VITVI01G00862,VITVI01G00914,VITVI01G04177,VITVI01G00626,VITVI01G01793,VITVI02G00633,VITVI02G00726,VITVI02G04001,VITVI02…
GO:MF	carbon-carbon lyase activity	GO:0016830	2.4196e-06	5.61626	130	446	13	35134	VITVI01G04336,VITVI01G01682,VITVI02G00475,VITVI03G01097,VITVI04G00870,VITVI05G00737,VITVI06G00407,VITVI06G00673,VITVI09G00517,VITVI10G00048,VITVI10G01613,VITVI17G01086,VITVI17G00178
GO:MF	microtubule minus-end binding	GO:0051011	0.000437402	3.35912	9	446	4	35134	VITVI07G01958,VITVI08G01759,VITVI15G00149,VITVI18G00847
GO:MF	anion binding	GO:0043168	0.000533008	3.27327	4775	446	95	35134	VITVI10G01207,VITVI16G01246,VITVI15G04507,VITVI07G01423,VITVI01G01496,VITVI01G01682,VITVI01G00303,VITVI01G00521,VITVI01G00862,VITVI01G04177,VITVI02G00633,VITVI02G00726,VITVI02G04001,VITVI02G00009,VITVI02G00475,VITVI03G01017,VITVI03G00361,VITVI04G00167,VITVI04G00186,VITVI04G00249,VITVI04G00870,VITVI05G00737,VITVI05G00067,VITVI06G00104,VITVI06G00287,VITVI06G00374,VITVI06G00407,VITVI06G00474,VITVI06…
GO:MF	small molecule binding	GO:0036094	0.00132674	2.87721	4904	446	95	35134	VITVI10G01207,VITVI16G01246,VITVI15G04507,VITVI07G01423,VITVI01G01496,VITVI01G01682,VITVI01G00303,VITVI01G00521,VITVI01G00862,VITVI01G04177,VITVI02G00633,VITVI02G00726,VITVI02G04001,VITVI02G00009,VITVI02G00475,VITVI03G01017,VITVI03G00361,VITVI04G00167,VITVI04G00186,VITVI04G00249,VITVI04G00870,VITVI05G00737,VITVI05G00067,VITVI06G00104,VITVI06G00287,VITVI06G00374,VITVI06G00407,VITVI06G00474,VITVI06…
GO:MF	ion binding	GO:0043167	0.00209136	2.67957	8296	446	143	35134	VITVI10G01207,VITVI10G00223,VITVI15G04473,VITVI02G00564,VITVI16G01246,VITVI10G00245,VITVI04G02280,VITVI15G04507,VITVI07G01423,VITVI01G01496,VITVI01G01682,VITVI01G00303,VITVI01G00521,VITVI01G00862,VITVI01G04177,VITVI01G01793,VITVI02G00633,VITVI02G00726,VITVI02G04001,VITVI02G00009,VITVI02G00424,VITVI02G01153,VITVI02G01770,VITVI02G00475,VITVI03G01017,VITVI03G01572,VITVI03G00361,VITVI04G00167,VITVI04…
GO:MF	carboxy-lyase activity	GO:0016831	0.00209136	2.67957	95	446	8	35134	VITVI01G04336,VITVI01G01682,VITVI03G01097,VITVI04G00870,VITVI06G00673,VITVI10G00048,VITVI10G01613,VITVI17G01086
GO:MF	deoxyribodipyrimidine photo-lyase activity	GO:0003904	0.00250162	2.60178	6	446	3	35134	VITVI02G00475,VITVI05G00737,VITVI09G00517
GO:MF	phosphatase activity	GO:0016791	0.0031271	2.50486	313	446	14	35134	VITVI10G00223,VITVI15G04473,VITVI04G02280,VITVI01G00541,VITVI01G00626,VITVI06G00676,VITVI08G01783,VITVI08G01108,VITVI11G00270,VITVI12G01529,VITVI14G00300,VITVI14G00528,VITVI18G00806,VITVI18G00072
GO:MF	phosphoric ester hydrolase activity	GO:0042578	0.00325238	2.4878	360	446	15	35134	VITVI10G00223,VITVI15G04473,VITVI04G02280,VITVI01G00541,VITVI01G00626,VITVI02G00424,VITVI06G00676,VITVI08G01783,VITVI08G01108,VITVI11G00270,VITVI12G01529,VITVI14G00300,VITVI14G00528,VITVI18G00806,VITVI18G00072
GO:MF	DNA photolyase activity	GO:0003913	0.00325238	2.4878	7	446	3	35134	VITVI02G00475,VITVI05G00737,VITVI09G00517
GO:MF	purine ribonucleoside triphosphate binding	GO:0035639	0.00375599	2.42528	3364	446	68	35134	VITVI10G01207,VITVI16G01246,VITVI07G01423,VITVI01G01496,VITVI01G00303,VITVI01G00521,VITVI01G00862,VITVI01G04177,VITVI02G00633,VITVI02G00726,VITVI02G04001,VITVI02G00009,VITVI03G00361,VITVI04G00167,VITVI04G00186,VITVI04G00249,VITVI06G00104,VITVI06G00287,VITVI06G00374,VITVI06G00407,VITVI06G00474,VITVI06G00676,VITVI06G01460,VITVI07G00311,VITVI07G00490,VITVI08G01204,VITVI08G01493,VITVI08G01509,VITVI08…
GO:MF	gamma-tubulin binding	GO:0043015	0.00441833	2.35474	8	446	3	35134	VITVI07G01958,VITVI08G01759,VITVI18G00847
GO:MF	phosphotransferase activity, for other substituted phosphate groups	GO:0016780	0.00711945	2.14755	23	446	4	35134	VITVI10G00765,VITVI10G00048,VITVI10G01613,VITVI14G01820
GO:MF	damaged DNA binding	GO:0003684	0.00911532	2.04023	46	446	5	35134	VITVI02G01153,VITVI09G00655,VITVI09G01250,VITVI14G00891,VITVI14G00274
GO:MF	hydrolase activity	GO:0016787	0.00911532	2.04023	3763	446	72	35134	VITVI10G00223,VITVI15G04473,VITVI02G00564,VITVI04G02280,VITVI00G04866,VITVI01G00066,VITVI01G00541,VITVI01G04177,VITVI01G00626,VITVI01G01793,VITVI02G00726,VITVI02G00009,VITVI02G00125,VITVI02G00424,VITVI03G01572,VITVI04G00167,VITVI04G00186,VITVI04G00290,VITVI04G00411,VITVI05G01094,VITVI05G00986,VITVI06G00287,VITVI06G00347,VITVI06G00407,VITVI06G00676,VITVI06G01460,VITVI07G00311,VITVI07G02198,VITVI08…
GO:MF	ATP binding	GO:0005524	0.00911532	2.04023	3051	446	61	35134	VITVI10G01207,VITVI16G01246,VITVI07G01423,VITVI01G00303,VITVI01G00521,VITVI01G00862,VITVI02G00633,VITVI02G00726,VITVI02G04001,VITVI02G00009,VITVI03G00361,VITVI04G00167,VITVI04G00186,VITVI04G00249,VITVI06G00104,VITVI06G00287,VITVI06G00374,VITVI06G00474,VITVI06G00676,VITVI06G01460,VITVI07G00311,VITVI07G00490,VITVI08G01204,VITVI08G01493,VITVI08G01509,VITVI08G00799,VITVI09G01129,VITVI10G00505,VITVI10…
GO:MF	catalytic activity	GO:0003824	0.0107184	1.96987	11701	446	183	35134	VITVI10G01207,VITVI10G00223,VITVI15G04473,VITVI07G01255,VITVI02G00564,VITVI16G01246,VITVI10G00462,VITVI04G02280,VITVI07G01423,VITVI00G04866,VITVI01G04336,VITVI01G01682,VITVI01G00066,VITVI01G00303,VITVI01G00521,VITVI01G00541,VITVI01G00862,VITVI01G00886,VITVI01G04177,VITVI01G00626,VITVI01G01793,VITVI02G00633,VITVI02G00726,VITVI02G00752,VITVI02G04001,VITVI02G00009,VITVI02G00125,VITVI02G00402,VITVI02…
GO:MF	starch binding	GO:2001070	0.011699	1.93185	12	446	3	35134	VITVI01G00914,VITVI05G00607,VITVI06G00676
GO:MF	malonyl-CoA decarboxylase activity	GO:0050080	0.0118535	1.92615	3	446	2	35134	VITVI10G00048,VITVI10G01613
GO:MF	alcohol binding	GO:0043178	0.0118535	1.92615	51	446	5	35134	VITVI05G00067,VITVI08G00768,VITVI13G00114,VITVI00G04585,VITVI14G01992
GO:MF	signaling receptor activity	GO:0038023	0.0118535	1.92615	216	446	10	35134	VITVI05G00737,VITVI05G00067,VITVI06G00374,VITVI07G00359,VITVI08G00768,VITVI10G00048,VITVI10G01613,VITVI11G00539,VITVI12G01449,VITVI13G00114
GO:MF	ubiquitin binding	GO:0043130	0.0133092	1.87585	53	446	5	35134	VITVI07G00060,VITVI09G00326,VITVI09G01250,VITVI11G01448,VITVI16G00703
GO:MF	carbohydrate kinase activity	GO:0019200	0.0140093	1.85358	31	446	4	35134	VITVI04G00249,VITVI06G00676,VITVI11G00260,VITVI18G00591
GO:MF	lyase activity	GO:0016829	0.0141809	1.8483	452	446	15	35134	VITVI01G04336,VITVI01G01682,VITVI02G00475,VITVI03G01097,VITVI04G00870,VITVI05G00737,VITVI06G00407,VITVI06G00673,VITVI09G00517,VITVI09G00655,VITVI10G00048,VITVI10G01613,VITVI17G01084,VITVI17G01086,VITVI17G00178
GO:MF	nucleotide binding	GO:0000166	0.0141809	1.8483	4636	446	83	35134	VITVI10G01207,VITVI16G01246,VITVI07G01423,VITVI01G01496,VITVI01G00303,VITVI01G00521,VITVI01G00862,VITVI01G04177,VITVI02G00633,VITVI02G00726,VITVI02G04001,VITVI02G00009,VITVI02G00475,VITVI03G01017,VITVI03G00361,VITVI04G00167,VITVI04G00186,VITVI04G00249,VITVI05G00737,VITVI06G00104,VITVI06G00287,VITVI06G00374,VITVI06G00407,VITVI06G00474,VITVI06G00676,VITVI06G00956,VITVI06G01460,VITVI07G00311,VITVI07…
GO:MF	phosphatase regulator activity	GO:0019208	0.0141809	1.8483	85	446	6	35134	VITVI05G00067,VITVI07G00630,VITVI08G00768,VITVI13G00114,VITVI14G04601,VITVI17G00856
GO:MF	protein phosphatase regulator activity	GO:0019888	0.0141809	1.8483	83	446	6	35134	VITVI05G00067,VITVI07G00630,VITVI08G00768,VITVI13G00114,VITVI14G04601,VITVI17G00856
GO:MF	carbohydrate derivative binding	GO:0097367	0.0141809	1.8483	4307	446	78	35134	VITVI10G01207,VITVI16G01246,VITVI07G01423,VITVI01G01496,VITVI01G00303,VITVI01G00521,VITVI01G00862,VITVI01G00914,VITVI01G04177,VITVI02G00633,VITVI02G00726,VITVI02G04001,VITVI02G00009,VITVI03G00361,VITVI04G00167,VITVI04G00186,VITVI04G00249,VITVI06G00104,VITVI06G00287,VITVI06G00374,VITVI06G00407,VITVI06G00474,VITVI06G00676,VITVI06G01460,VITVI07G00311,VITVI07G00490,VITVI08G01204,VITVI08G01493,VITVI08…
GO:MF	nucleoside phosphate binding	GO:1901265	0.0141809	1.8483	4636	446	83	35134	VITVI10G01207,VITVI16G01246,VITVI07G01423,VITVI01G01496,VITVI01G00303,VITVI01G00521,VITVI01G00862,VITVI01G04177,VITVI02G00633,VITVI02G00726,VITVI02G04001,VITVI02G00009,VITVI02G00475,VITVI03G01017,VITVI03G00361,VITVI04G00167,VITVI04G00186,VITVI04G00249,VITVI05G00737,VITVI06G00104,VITVI06G00287,VITVI06G00374,VITVI06G00407,VITVI06G00474,VITVI06G00676,VITVI06G00956,VITVI06G01460,VITVI07G00311,VITVI07…
GO:MF	molecular transducer activity	GO:0060089	0.014749	1.83124	232	446	10	35134	VITVI05G00737,VITVI05G00067,VITVI06G00374,VITVI07G00359,VITVI08G00768,VITVI10G00048,VITVI10G01613,VITVI11G00539,VITVI12G01449,VITVI13G00114
GO:MF	hydrolase activity, acting on ester bonds	GO:0016788	0.0147624	1.83084	1100	446	27	35134	VITVI10G00223,VITVI15G04473,VITVI04G02280,VITVI01G00541,VITVI01G00626,VITVI02G00424,VITVI04G00186,VITVI04G00290,VITVI04G00411,VITVI06G00676,VITVI08G01783,VITVI08G01108,VITVI08G00126,VITVI10G00557,VITVI10G01339,VITVI11G00270,VITVI12G01529,VITVI13G00128,VITVI13G01626,VITVI14G00300,VITVI14G01722,VITVI14G01820,VITVI14G00528,VITVI14G00274,VITVI16G01418,VITVI18G00806,VITVI18G00072
GO:MF	oligosaccharide binding	GO:0070492	0.0147624	1.83084	4	446	2	35134	VITVI01G00914,VITVI06G01091
GO:MF	glutamate decarboxylase activity	GO:0004351	0.0147624	1.83084	4	446	2	35134	VITVI04G00870,VITVI17G01086
GO:MF	ubiquitin-like protein binding	GO:0032182	0.0147624	1.83084	59	446	5	35134	VITVI07G00060,VITVI09G00326,VITVI09G01250,VITVI11G01448,VITVI16G00703
GO:MF	ribonucleotide binding	GO:0032553	0.0147624	1.83084	4259	446	77	35134	VITVI10G01207,VITVI16G01246,VITVI07G01423,VITVI01G01496,VITVI01G00303,VITVI01G00521,VITVI01G00862,VITVI01G04177,VITVI02G00633,VITVI02G00726,VITVI02G04001,VITVI02G00009,VITVI03G00361,VITVI04G00167,VITVI04G00186,VITVI04G00249,VITVI06G00104,VITVI06G00287,VITVI06G00374,VITVI06G00407,VITVI06G00474,VITVI06G00676,VITVI06G01460,VITVI07G00311,VITVI07G00490,VITVI08G01204,VITVI08G01493,VITVI08G01509,VITVI08…
GO:MF	purine ribonucleotide binding	GO:0032555	0.0154284	1.81168	4215	446	76	35134	VITVI10G01207,VITVI16G01246,VITVI07G01423,VITVI01G01496,VITVI01G00303,VITVI01G00521,VITVI01G00862,VITVI01G04177,VITVI02G00633,VITVI02G00726,VITVI02G04001,VITVI02G00009,VITVI03G00361,VITVI04G00167,VITVI04G00186,VITVI04G00249,VITVI06G00104,VITVI06G00287,VITVI06G00374,VITVI06G00407,VITVI06G00474,VITVI06G00676,VITVI06G01460,VITVI07G00311,VITVI07G00490,VITVI08G01204,VITVI08G01493,VITVI08G01509,VITVI08…
GO:MF	protein binding	GO:0005515	0.0164348	1.78423	4981	446	87	35134	VITVI10G01207,VITVI07G00060,VITVI00G04835,VITVI01G01400,VITVI01G00626,VITVI02G00009,VITVI02G00098,VITVI03G00361,VITVI04G00050,VITVI04G00186,VITVI04G01821,VITVI04G00381,VITVI04G01665,VITVI05G01765,VITVI06G00218,VITVI06G00419,VITVI06G00814,VITVI06G00990,VITVI06G01091,VITVI06G01225,VITVI06G01298,VITVI06G01552,VITVI07G00359,VITVI07G00400,VITVI07G02656,VITVI07G01911,VITVI07G01958,VITVI07G01985,VITVI07…
GO:MF	organic cyclic compound binding	GO:0097159	0.0169742	1.77021	10094	446	158	35134	VITVI10G01207,VITVI16G01246,VITVI02G01721,VITVI10G04301,VITVI07G03056,VITVI07G01423,VITVI01G01496,VITVI01G01682,VITVI01G00303,VITVI01G01995,VITVI01G00521,VITVI01G00862,VITVI01G04177,VITVI02G00633,VITVI02G00726,VITVI02G04001,VITVI02G00009,VITVI02G00037,VITVI02G01153,VITVI02G01770,VITVI02G00475,VITVI03G01012,VITVI03G01017,VITVI03G00476,VITVI03G00361,VITVI04G00167,VITVI04G00186,VITVI04G01821,VITVI04…
GO:MF	blue light photoreceptor activity	GO:0009882	0.0212748	1.67213	5	446	2	35134	VITVI05G00737,VITVI06G00374
GO:MF	heterocyclic compound binding	GO:1901363	0.0212748	1.67213	10081	446	157	35134	VITVI10G01207,VITVI16G01246,VITVI02G01721,VITVI10G04301,VITVI07G03056,VITVI07G01423,VITVI01G01496,VITVI01G01682,VITVI01G00303,VITVI01G01995,VITVI01G00521,VITVI01G00862,VITVI01G04177,VITVI02G00633,VITVI02G00726,VITVI02G04001,VITVI02G00009,VITVI02G00037,VITVI02G01153,VITVI02G01770,VITVI02G00475,VITVI03G01012,VITVI03G01017,VITVI03G00476,VITVI03G00361,VITVI04G00167,VITVI04G00186,VITVI04G01821,VITVI04…
GO:MF	purine nucleotide binding	GO:0017076	0.0252599	1.59757	4380	446	77	35134	VITVI10G01207,VITVI16G01246,VITVI07G01423,VITVI01G01496,VITVI01G00303,VITVI01G00521,VITVI01G00862,VITVI01G04177,VITVI02G00633,VITVI02G00726,VITVI02G04001,VITVI02G00009,VITVI03G00361,VITVI04G00167,VITVI04G00186,VITVI04G00249,VITVI06G00104,VITVI06G00287,VITVI06G00374,VITVI06G00407,VITVI06G00474,VITVI06G00676,VITVI06G01460,VITVI07G00311,VITVI07G00490,VITVI08G01204,VITVI08G01493,VITVI08G01509,VITVI08…
GO:MF	transporter activity	GO:0005215	0.0267357	1.57291	1579	446	34	35134	VITVI10G04301,VITVI07G01381,VITVI01G00039,VITVI02G00726,VITVI03G01012,VITVI04G00109,VITVI04G00167,VITVI04G01235,VITVI05G00710,VITVI05G01956,VITVI05G00873,VITVI05G01471,VITVI06G00487,VITVI07G00311,VITVI07G00490,VITVI08G01493,VITVI09G00758,VITVI09G01129,VITVI09G01947,VITVI10G04409,VITVI10G00777,VITVI11G00967,VITVI12G00306,VITVI12G04293,VITVI13G00562,VITVI13G00677,VITVI14G01739,VITVI14G01992,VITVI15…
GO:MF	lipid binding	GO:0008289	0.0287339	1.54161	311	446	11	35134	VITVI02G00978,VITVI04G00050,VITVI05G00067,VITVI06G00487,VITVI08G00768,VITVI09G00310,VITVI09G00326,VITVI11G00523,VITVI11G00615,VITVI13G00114,VITVI17G00313
GO:MF	transmembrane transporter activity	GO:0022857	0.0288566	1.53975	1530	446	33	35134	VITVI10G04301,VITVI07G01381,VITVI01G00039,VITVI02G00726,VITVI03G01012,VITVI04G00109,VITVI04G00167,VITVI04G01235,VITVI05G00710,VITVI05G01956,VITVI05G00873,VITVI05G01471,VITVI07G00311,VITVI07G00490,VITVI08G01493,VITVI09G00758,VITVI09G01129,VITVI09G01947,VITVI10G04409,VITVI10G00777,VITVI11G00967,VITVI12G00306,VITVI12G04293,VITVI13G00562,VITVI13G00677,VITVI14G01739,VITVI14G01992,VITVI15G00434,VITVI16…
GO:MF	adenyl ribonucleotide binding	GO:0032559	0.0347794	1.45868	3902	446	69	35134	VITVI10G01207,VITVI16G01246,VITVI07G01423,VITVI01G00303,VITVI01G00521,VITVI01G00862,VITVI02G00633,VITVI02G00726,VITVI02G04001,VITVI02G00009,VITVI03G00361,VITVI04G00167,VITVI04G00186,VITVI04G00249,VITVI06G00104,VITVI06G00287,VITVI06G00374,VITVI06G00474,VITVI06G00676,VITVI06G01460,VITVI07G00311,VITVI07G00490,VITVI08G01204,VITVI08G01493,VITVI08G01509,VITVI08G00799,VITVI09G01565,VITVI09G01129,VITVI10…
GO:MF	catalytic activity, acting on a protein	GO:0140096	0.0347794	1.45868	3362	446	61	35134	VITVI10G01207,VITVI02G00564,VITVI16G01246,VITVI04G02280,VITVI07G01423,VITVI01G00521,VITVI01G00626,VITVI02G04001,VITVI05G00440,VITVI05G00120,VITVI06G00020,VITVI06G00104,VITVI06G00347,VITVI06G00374,VITVI06G00474,VITVI07G00359,VITVI07G04732,VITVI07G00031,VITVI08G01204,VITVI08G01509,VITVI08G01910,VITVI08G00205,VITVI08G00923,VITVI10G00505,VITVI10G00604,VITVI10G00651,VITVI10G00048,VITVI10G01613,VITVI11…
GO:MF	protein serine/threonine kinase activity	GO:0004674	0.044262	1.35397	864	446	21	35134	VITVI10G01207,VITVI16G01246,VITVI01G00521,VITVI06G00104,VITVI06G00374,VITVI08G01204,VITVI10G00604,VITVI10G00651,VITVI10G00048,VITVI10G01613,VITVI11G01396,VITVI12G02227,VITVI12G01449,VITVI12G02545,VITVI13G00715,VITVI13G01626,VITVI14G04419,VITVI17G00175,VITVI17G00225,VITVI17G00942,VITVI18G00534
GO:MF	lipid phosphatase activity	GO:0042577	0.0487894	1.31167	8	446	2	35134	VITVI08G01783,VITVI08G01108
GO:BP	biological_process	GO:0008150	2.5966e-08	7.5856	18606	446	305	35134	VITVI10G01207,VITVI07G00060,VITVI10G00191,VITVI15G04473,VITVI01G00669,VITVI02G00564,VITVI16G01246,VITVI10G00245,VITVI10G00462,VITVI02G01721,VITVI04G02280,VITVI10G04301,VITVI07G03056,VITVI07G01381,VITVI07G01423,VITVI00G04866,VITVI01G04336,VITVI01G01496,VITVI01G01682,VITVI01G00039,VITVI01G00066,VITVI01G00303,VITVI01G00487,VITVI01G01995,VITVI01G00521,VITVI01G00541,VITVI01G00862,VITVI01G00914,VITVI01…
GO:BP	cellular process	GO:0009987	2.45385e-06	5.61015	14813	446	249	35134	VITVI10G01207,VITVI07G00060,VITVI10G00191,VITVI15G04473,VITVI01G00669,VITVI02G00564,VITVI16G01246,VITVI10G00462,VITVI04G02280,VITVI10G04301,VITVI07G03056,VITVI07G01381,VITVI07G01423,VITVI01G04336,VITVI01G01496,VITVI01G01682,VITVI01G00039,VITVI01G00303,VITVI01G00487,VITVI01G01995,VITVI01G00521,VITVI01G00541,VITVI01G00862,VITVI01G00914,VITVI01G04177,VITVI01G00626,VITVI02G00633,VITVI02G00726,VITVI02…
GO:BP	regulation of biological process	GO:0050789	7.49773e-06	5.12507	4094	446	93	35134	VITVI10G00191,VITVI10G00245,VITVI10G00462,VITVI07G03056,VITVI01G00487,VITVI01G01995,VITVI01G00862,VITVI01G00914,VITVI02G00696,VITVI02G00037,VITVI03G01012,VITVI03G00618,VITVI03G00675,VITVI04G00052,VITVI04G00186,VITVI04G00380,VITVI04G00381,VITVI04G00498,VITVI04G01665,VITVI04G01746,VITVI05G00607,VITVI05G00737,VITVI05G00067,VITVI06G01574,VITVI06G00104,VITVI06G00277,VITVI06G00287,VITVI06G00304,VITVI06…
GO:BP	biological regulation	GO:0065007	1.93983e-05	4.71224	4388	446	96	35134	VITVI10G00191,VITVI10G00245,VITVI10G00462,VITVI07G03056,VITVI01G00487,VITVI01G01995,VITVI01G00862,VITVI01G00914,VITVI02G00696,VITVI02G00037,VITVI02G00222,VITVI03G01012,VITVI03G00618,VITVI03G00675,VITVI04G00052,VITVI04G00186,VITVI04G00380,VITVI04G00381,VITVI04G00498,VITVI04G01665,VITVI04G01746,VITVI05G00607,VITVI05G00737,VITVI05G00067,VITVI06G01574,VITVI06G00104,VITVI06G00277,VITVI06G00287,VITVI06…
GO:BP	dephosphorylation	GO:0016311	0.000112642	3.9483	204	446	14	35134	VITVI04G02280,VITVI01G00541,VITVI01G00626,VITVI05G00067,VITVI07G00630,VITVI08G01783,VITVI08G00768,VITVI11G00270,VITVI12G01529,VITVI13G00114,VITVI14G00528,VITVI17G00856,VITVI18G00806,VITVI18G00072
GO:BP	response to light stimulus	GO:0009416	0.000182501	3.73873	248	446	15	35134	VITVI02G00009,VITVI02G00098,VITVI02G00475,VITVI04G00052,VITVI04G00381,VITVI05G00737,VITVI05G00817,VITVI06G00374,VITVI06G00814,VITVI09G00517,VITVI11G00280,VITVI12G00299,VITVI14G01124,VITVI14G00274,VITVI18G00794
GO:BP	response to radiation	GO:0009314	0.000325755	3.48711	263	446	15	35134	VITVI02G00009,VITVI02G00098,VITVI02G00475,VITVI04G00052,VITVI04G00381,VITVI05G00737,VITVI05G00817,VITVI06G00374,VITVI06G00814,VITVI09G00517,VITVI11G00280,VITVI12G00299,VITVI14G01124,VITVI14G00274,VITVI18G00794
GO:BP	organic substance metabolic process	GO:0071704	0.000532084	3.27402	12549	446	206	35134	VITVI10G01207,VITVI07G00060,VITVI10G00191,VITVI02G00564,VITVI16G01246,VITVI10G00462,VITVI04G02280,VITVI10G04301,VITVI07G03056,VITVI07G01423,VITVI00G04866,VITVI01G04336,VITVI01G01496,VITVI01G01682,VITVI01G00066,VITVI01G00303,VITVI01G00487,VITVI01G01995,VITVI01G00521,VITVI01G00541,VITVI01G00862,VITVI01G00914,VITVI01G00626,VITVI02G00633,VITVI02G04001,VITVI02G00009,VITVI02G00125,VITVI02G00402,VITVI02…
GO:BP	regulation of cellular process	GO:0050794	0.000720614	3.1423	3813	446	80	35134	VITVI10G00191,VITVI07G03056,VITVI01G00487,VITVI01G01995,VITVI01G00862,VITVI01G00914,VITVI02G00037,VITVI03G01012,VITVI03G00618,VITVI03G00675,VITVI04G00186,VITVI04G00380,VITVI04G00381,VITVI04G00498,VITVI04G01665,VITVI04G01746,VITVI05G00737,VITVI05G00067,VITVI06G01574,VITVI06G00104,VITVI06G00277,VITVI06G00287,VITVI06G00304,VITVI06G00374,VITVI06G01225,VITVI06G01471,VITVI06G01552,VITVI07G00359,VITVI07…
GO:BP	response to stimulus	GO:0050896	0.000792707	3.10089	4152	446	85	35134	VITVI10G00245,VITVI02G01721,VITVI01G01995,VITVI01G01711,VITVI02G00009,VITVI02G00098,VITVI02G01153,VITVI02G00475,VITVI03G01012,VITVI04G00052,VITVI04G00381,VITVI04G04448,VITVI04G01665,VITVI04G01746,VITVI05G00737,VITVI05G00817,VITVI05G00067,VITVI06G00104,VITVI06G00374,VITVI06G01723,VITVI06G00676,VITVI06G00814,VITVI06G01091,VITVI06G01225,VITVI06G01298,VITVI07G00359,VITVI07G00149,VITVI08G02226,VITVI08…
GO:BP	phosphorus metabolic process	GO:0006793	0.000792707	3.10089	2853	446	64	35134	VITVI10G01207,VITVI16G01246,VITVI04G02280,VITVI07G01423,VITVI01G00487,VITVI01G00521,VITVI01G00541,VITVI01G00626,VITVI02G00633,VITVI02G00402,VITVI02G00424,VITVI03G00361,VITVI03G00675,VITVI04G00249,VITVI05G00067,VITVI06G00104,VITVI06G00374,VITVI06G00474,VITVI06G00676,VITVI07G00359,VITVI07G00630,VITVI07G02667,VITVI08G01204,VITVI08G01509,VITVI08G01783,VITVI08G01950,VITVI08G01081,VITVI08G00768,VITVI10…
GO:BP	primary metabolic process	GO:0044238	0.000892054	3.04961	11731	446	193	35134	VITVI10G01207,VITVI07G00060,VITVI10G00191,VITVI02G00564,VITVI16G01246,VITVI10G00462,VITVI04G02280,VITVI10G04301,VITVI07G03056,VITVI07G01423,VITVI00G04866,VITVI01G01496,VITVI01G01682,VITVI01G00066,VITVI01G00303,VITVI01G00487,VITVI01G01995,VITVI01G00521,VITVI01G00541,VITVI01G00862,VITVI01G00914,VITVI01G00626,VITVI02G00633,VITVI02G04001,VITVI02G00009,VITVI02G00125,VITVI02G00402,VITVI02G00424,VITVI02…
GO:BP	metabolic process	GO:0008152	0.00117639	2.92945	13524	446	216	35134	VITVI10G01207,VITVI07G00060,VITVI10G00191,VITVI15G04473,VITVI02G00564,VITVI16G01246,VITVI10G00462,VITVI04G02280,VITVI10G04301,VITVI07G03056,VITVI07G01423,VITVI00G04866,VITVI01G04336,VITVI01G01496,VITVI01G01682,VITVI01G00066,VITVI01G00303,VITVI01G00487,VITVI01G01995,VITVI01G00521,VITVI01G00541,VITVI01G00862,VITVI01G00914,VITVI01G00626,VITVI02G00633,VITVI02G04001,VITVI02G00009,VITVI02G00125,VITVI02…
GO:BP	regulation of metabolic process	GO:0019222	0.00127685	2.89386	2742	446	61	35134	VITVI10G00191,VITVI07G03056,VITVI01G00487,VITVI01G01995,VITVI01G00862,VITVI01G00914,VITVI03G01012,VITVI03G00618,VITVI03G00675,VITVI04G00186,VITVI04G00380,VITVI04G00381,VITVI04G00498,VITVI04G01665,VITVI05G00607,VITVI05G00737,VITVI05G00067,VITVI06G01574,VITVI06G00277,VITVI06G00287,VITVI06G00304,VITVI06G01114,VITVI06G01225,VITVI06G01471,VITVI06G01552,VITVI07G02667,VITVI07G00149,VITVI07G00122,VITVI07…
GO:BP	protein dephosphorylation	GO:0006470	0.00127685	2.89386	172	446	11	35134	VITVI04G02280,VITVI01G00626,VITVI05G00067,VITVI07G00630,VITVI08G00768,VITVI11G00270,VITVI12G01529,VITVI13G00114,VITVI17G00856,VITVI18G00806,VITVI18G00072
GO:BP	protein modification process	GO:0036211	0.00140386	2.85268	2885	446	63	35134	VITVI10G01207,VITVI07G00060,VITVI16G01246,VITVI04G02280,VITVI07G01423,VITVI01G00521,VITVI01G00626,VITVI02G04001,VITVI03G00675,VITVI04G00380,VITVI04G00381,VITVI05G00120,VITVI05G00067,VITVI06G00020,VITVI06G00104,VITVI06G00287,VITVI06G00347,VITVI06G00374,VITVI06G00474,VITVI06G00814,VITVI07G00630,VITVI07G02667,VITVI08G01204,VITVI08G01509,VITVI08G00923,VITVI08G00768,VITVI10G00505,VITVI10G00604,VITVI10…
GO:BP	phosphate-containing compound metabolic process	GO:0006796	0.00140386	2.85268	2821	446	62	35134	VITVI10G01207,VITVI16G01246,VITVI04G02280,VITVI07G01423,VITVI01G00487,VITVI01G00521,VITVI01G00541,VITVI01G00626,VITVI02G00633,VITVI02G00402,VITVI02G00424,VITVI03G00361,VITVI03G00675,VITVI04G00249,VITVI05G00067,VITVI06G00104,VITVI06G00374,VITVI06G00474,VITVI06G00676,VITVI07G00359,VITVI07G00630,VITVI07G02667,VITVI08G01204,VITVI08G01509,VITVI08G01783,VITVI08G01950,VITVI08G01081,VITVI08G00768,VITVI10…
GO:BP	regulation of cellular metabolic process	GO:0031323	0.00243139	2.61415	2637	446	58	35134	VITVI10G00191,VITVI07G03056,VITVI01G00487,VITVI01G01995,VITVI01G00862,VITVI01G00914,VITVI03G01012,VITVI03G00618,VITVI03G00675,VITVI04G00186,VITVI04G00380,VITVI04G00381,VITVI04G00498,VITVI04G01665,VITVI05G00737,VITVI05G00067,VITVI06G01574,VITVI06G00277,VITVI06G00287,VITVI06G00304,VITVI06G01225,VITVI06G01471,VITVI06G01552,VITVI07G02667,VITVI07G00149,VITVI07G00122,VITVI07G01492,VITVI08G00893,VITVI08…
GO:BP	response to abiotic stimulus	GO:0009628	0.00258797	2.58704	604	446	21	35134	VITVI02G00009,VITVI02G00098,VITVI02G00475,VITVI04G00052,VITVI04G00381,VITVI05G00737,VITVI05G00817,VITVI06G00374,VITVI06G00814,VITVI09G00517,VITVI10G00835,VITVI11G00280,VITVI11G00430,VITVI12G00299,VITVI12G00619,VITVI14G01124,VITVI14G01991,VITVI14G00274,VITVI16G00956,VITVI18G00794,VITVI18G00072
GO:BP	regulation of macromolecule metabolic process	GO:0060255	0.00258797	2.58704	2652	446	58	35134	VITVI10G00191,VITVI07G03056,VITVI01G01995,VITVI01G00862,VITVI01G00914,VITVI03G01012,VITVI03G00618,VITVI03G00675,VITVI04G00186,VITVI04G00380,VITVI04G00381,VITVI04G00498,VITVI04G01665,VITVI05G00607,VITVI05G00737,VITVI05G00067,VITVI06G01574,VITVI06G00277,VITVI06G00287,VITVI06G00304,VITVI06G01114,VITVI06G01225,VITVI06G01471,VITVI06G01552,VITVI07G02667,VITVI07G00149,VITVI07G00122,VITVI07G01492,VITVI08…
GO:BP	negative regulation of biological process	GO:0048519	0.00290699	2.53656	611	446	21	35134	VITVI01G00862,VITVI03G01012,VITVI04G00186,VITVI04G00381,VITVI04G01665,VITVI06G00277,VITVI06G01114,VITVI06G01225,VITVI07G00359,VITVI07G02667,VITVI07G01492,VITVI08G00126,VITVI10G00604,VITVI10G01339,VITVI12G00619,VITVI16G00341,VITVI16G01342,VITVI16G00956,VITVI18G00224,VITVI18G01069,VITVI19G00124
GO:BP	reproductive process	GO:0022414	0.00301409	2.52084	568	446	20	35134	VITVI01G00303,VITVI01G00862,VITVI01G00914,VITVI02G00696,VITVI02G01153,VITVI04G00052,VITVI04G00381,VITVI04G00498,VITVI06G01225,VITVI07G01958,VITVI08G01759,VITVI09G00310,VITVI09G01274,VITVI11G00280,VITVI13G02064,VITVI13G01700,VITVI16G00341,VITVI16G00956,VITVI18G00794,VITVI18G00847
GO:BP	cellular metabolic process	GO:0044237	0.00349283	2.45682	10831	446	176	35134	VITVI10G01207,VITVI10G00191,VITVI15G04473,VITVI16G01246,VITVI10G00462,VITVI04G02280,VITVI10G04301,VITVI07G03056,VITVI07G01423,VITVI01G04336,VITVI01G01496,VITVI01G01682,VITVI01G00303,VITVI01G00487,VITVI01G01995,VITVI01G00521,VITVI01G00541,VITVI01G00862,VITVI01G00914,VITVI01G00626,VITVI02G00633,VITVI02G00009,VITVI02G00402,VITVI02G00424,VITVI02G01153,VITVI02G00535,VITVI02G00475,VITVI03G01012,VITVI03…
GO:BP	reproduction	GO:0000003	0.00349283	2.45682	576	446	20	35134	VITVI01G00303,VITVI01G00862,VITVI01G00914,VITVI02G00696,VITVI02G01153,VITVI04G00052,VITVI04G00381,VITVI04G00498,VITVI06G01225,VITVI07G01958,VITVI08G01759,VITVI09G00310,VITVI09G01274,VITVI11G00280,VITVI13G02064,VITVI13G01700,VITVI16G00341,VITVI16G00956,VITVI18G00794,VITVI18G00847
GO:BP	organonitrogen compound metabolic process	GO:1901564	0.00357876	2.44627	5778	446	105	35134	VITVI10G01207,VITVI07G00060,VITVI02G00564,VITVI16G01246,VITVI04G02280,VITVI07G01423,VITVI01G04336,VITVI01G01682,VITVI01G00303,VITVI01G01995,VITVI01G00521,VITVI01G00626,VITVI02G00633,VITVI02G04001,VITVI02G00424,VITVI03G00675,VITVI04G00380,VITVI04G00381,VITVI04G00870,VITVI05G01878,VITVI05G00986,VITVI05G00120,VITVI05G00067,VITVI05G01684,VITVI06G00020,VITVI06G00104,VITVI06G00287,VITVI06G00347,VITVI06…
GO:BP	protein metabolic process	GO:0019538	0.00556622	2.25444	4830	446	90	35134	VITVI10G01207,VITVI07G00060,VITVI02G00564,VITVI16G01246,VITVI04G02280,VITVI07G01423,VITVI01G00303,VITVI01G01995,VITVI01G00521,VITVI01G00626,VITVI02G04001,VITVI03G00675,VITVI04G00380,VITVI04G00381,VITVI05G00120,VITVI05G00067,VITVI05G01684,VITVI06G00020,VITVI06G00104,VITVI06G00287,VITVI06G00347,VITVI06G00374,VITVI06G00474,VITVI06G00814,VITVI06G01114,VITVI07G00630,VITVI07G02656,VITVI07G02667,VITVI07…
GO:BP	regulation of starch metabolic process	GO:2000904	0.00557875	2.25346	8	446	3	35134	VITVI01G00914,VITVI04G00498,VITVI05G00607
GO:BP	post-embryonic development	GO:0009791	0.00908941	2.04146	485	446	17	35134	VITVI01G00303,VITVI01G00862,VITVI01G00914,VITVI02G00696,VITVI02G00098,VITVI04G00052,VITVI04G00381,VITVI09G00310,VITVI09G01274,VITVI11G00280,VITVI12G00299,VITVI12G00306,VITVI12G00017,VITVI13G01700,VITVI16G00341,VITVI16G00956,VITVI18G00794
GO:BP	microtubule polymerization or depolymerization	GO:0031109	0.00913667	2.03921	24	446	4	35134	VITVI07G01958,VITVI08G01759,VITVI11G00341,VITVI18G00847
GO:BP	regulation of cellular biosynthetic process	GO:0031326	0.00913667	2.03921	2393	446	51	35134	VITVI10G00191,VITVI07G03056,VITVI01G01995,VITVI01G00862,VITVI01G00914,VITVI03G01012,VITVI03G00618,VITVI04G00186,VITVI04G00380,VITVI04G00381,VITVI04G00498,VITVI04G01665,VITVI05G00737,VITVI06G01574,VITVI06G00277,VITVI06G00287,VITVI06G00304,VITVI06G01225,VITVI06G01471,VITVI06G01552,VITVI07G00149,VITVI07G00122,VITVI07G01492,VITVI08G00893,VITVI08G01050,VITVI08G00126,VITVI09G00133,VITVI09G00310,VITVI09…
GO:BP	photoperiodism	GO:0009648	0.00913667	2.03921	43	446	5	35134	VITVI04G00052,VITVI04G00381,VITVI05G00737,VITVI09G00517,VITVI11G00280
GO:BP	macromolecule metabolic process	GO:0043170	0.00913667	2.03921	9741	446	158	35134	VITVI10G01207,VITVI07G00060,VITVI10G00191,VITVI02G00564,VITVI16G01246,VITVI10G00462,VITVI04G02280,VITVI10G04301,VITVI07G03056,VITVI07G01423,VITVI00G04866,VITVI01G01496,VITVI01G00303,VITVI01G01995,VITVI01G00521,VITVI01G00862,VITVI01G00914,VITVI01G00626,VITVI02G04001,VITVI02G00009,VITVI02G00125,VITVI02G01153,VITVI02G00475,VITVI03G01012,VITVI03G00361,VITVI03G00618,VITVI03G00675,VITVI04G00186,VITVI04…
GO:BP	regulation of biosynthetic process	GO:0009889	0.00913667	2.03921	2399	446	51	35134	VITVI10G00191,VITVI07G03056,VITVI01G01995,VITVI01G00862,VITVI01G00914,VITVI03G01012,VITVI03G00618,VITVI04G00186,VITVI04G00380,VITVI04G00381,VITVI04G00498,VITVI04G01665,VITVI05G00737,VITVI06G01574,VITVI06G00277,VITVI06G00287,VITVI06G00304,VITVI06G01225,VITVI06G01471,VITVI06G01552,VITVI07G00149,VITVI07G00122,VITVI07G01492,VITVI08G00893,VITVI08G01050,VITVI08G00126,VITVI09G00133,VITVI09G00310,VITVI09…
GO:BP	carbohydrate phosphorylation	GO:0046835	0.00913667	2.03921	24	446	4	35134	VITVI04G00249,VITVI06G00676,VITVI11G00260,VITVI18G00591
GO:BP	spindle assembly	GO:0051225	0.00923408	2.03461	44	446	5	35134	VITVI06G01225,VITVI07G01958,VITVI08G01759,VITVI15G00149,VITVI18G00847
GO:BP	response to oxygen-containing compound	GO:1901700	0.0093192	2.03062	544	446	18	35134	VITVI02G01721,VITVI04G04448,VITVI05G00067,VITVI06G01298,VITVI07G00149,VITVI08G00768,VITVI10G00604,VITVI10G00835,VITVI11G00280,VITVI11G00539,VITVI12G01657,VITVI12G00619,VITVI13G00114,VITVI17G00748,VITVI17G00936,VITVI18G00638,VITVI18G00794,VITVI18G00072
GO:BP	circadian rhythm	GO:0007623	0.00944683	2.02471	45	446	5	35134	VITVI05G00737,VITVI07G00131,VITVI09G00517,VITVI11G00280,VITVI12G01657
GO:BP	response to blue light	GO:0009637	0.00944683	2.02471	25	446	4	35134	VITVI05G00737,VITVI06G00374,VITVI06G00814,VITVI14G01124
GO:BP	negative regulation of gene expression	GO:0010629	0.00944683	2.02471	239	446	11	35134	VITVI01G00862,VITVI03G01012,VITVI04G00186,VITVI04G00381,VITVI04G01665,VITVI06G00277,VITVI06G01225,VITVI08G00126,VITVI10G01339,VITVI16G01342,VITVI19G00124
GO:BP	negative regulation of macromolecule metabolic process	GO:0010605	0.0111755	1.95173	418	446	15	35134	VITVI01G00862,VITVI03G01012,VITVI04G00186,VITVI04G00381,VITVI04G01665,VITVI06G00277,VITVI06G01114,VITVI06G01225,VITVI07G02667,VITVI07G01492,VITVI08G00126,VITVI10G01339,VITVI16G01342,VITVI16G00956,VITVI19G00124
GO:BP	regulation of macromolecule biosynthetic process	GO:0010556	0.0111755	1.95173	2376	446	50	35134	VITVI10G00191,VITVI07G03056,VITVI01G01995,VITVI01G00862,VITVI01G00914,VITVI03G01012,VITVI03G00618,VITVI04G00186,VITVI04G00380,VITVI04G00381,VITVI04G00498,VITVI04G01665,VITVI05G00737,VITVI06G01574,VITVI06G00277,VITVI06G00287,VITVI06G00304,VITVI06G01225,VITVI06G01471,VITVI06G01552,VITVI07G00149,VITVI07G00122,VITVI07G01492,VITVI08G00893,VITVI08G01050,VITVI08G00126,VITVI09G00133,VITVI09G00310,VITVI09…
GO:BP	meiotic cell cycle	GO:0051321	0.0111755	1.95173	102	446	7	35134	VITVI02G01153,VITVI04G00498,VITVI06G01225,VITVI07G01958,VITVI08G01759,VITVI13G02064,VITVI18G00847
GO:BP	regulation of hydrolase activity	GO:0051336	0.0125232	1.90229	105	446	7	35134	VITVI02G00222,VITVI05G00067,VITVI06G01114,VITVI08G00768,VITVI13G00114,VITVI18G01069,VITVI19G00518
GO:BP	anatomical structure development	GO:0048856	0.0125232	1.90229	1037	446	27	35134	VITVI10G00462,VITVI01G00303,VITVI01G00862,VITVI01G00914,VITVI02G00696,VITVI02G00098,VITVI04G00052,VITVI04G00381,VITVI04G01665,VITVI06G01471,VITVI09G00057,VITVI09G00310,VITVI09G01274,VITVI10G00604,VITVI11G00280,VITVI12G00299,VITVI12G00306,VITVI12G00017,VITVI13G01700,VITVI14G00092,VITVI14G01646,VITVI14G01977,VITVI16G00341,VITVI16G00956,VITVI17G00762,VITVI18G00794,VITVI18G00931
GO:BP	microtubule nucleation	GO:0007020	0.0126614	1.89752	12	446	3	35134	VITVI07G01958,VITVI08G01759,VITVI18G00847
GO:BP	rhythmic process	GO:0048511	0.012879	1.89012	50	446	5	35134	VITVI05G00737,VITVI07G00131,VITVI09G00517,VITVI11G00280,VITVI12G01657
GO:BP	nucleotide-excision repair	GO:0006289	0.0133041	1.87602	51	446	5	35134	VITVI02G00009,VITVI02G01153,VITVI09G01250,VITVI14G00891,VITVI14G00274
GO:BP	negative regulation of metabolic process	GO:0009892	0.0133041	1.87602	431	446	15	35134	VITVI01G00862,VITVI03G01012,VITVI04G00186,VITVI04G00381,VITVI04G01665,VITVI06G00277,VITVI06G01114,VITVI06G01225,VITVI07G02667,VITVI07G01492,VITVI08G00126,VITVI10G01339,VITVI16G01342,VITVI16G00956,VITVI19G00124
GO:BP	establishment of localization	GO:0051234	0.0133041	1.87602	2732	446	55	35134	VITVI07G00060,VITVI01G00669,VITVI10G04301,VITVI07G01381,VITVI01G00039,VITVI01G00862,VITVI01G04177,VITVI02G00726,VITVI02G00857,VITVI02G00222,VITVI03G01012,VITVI04G00050,VITVI04G00109,VITVI04G00167,VITVI04G01235,VITVI04G01746,VITVI05G00710,VITVI05G01956,VITVI05G00873,VITVI05G01765,VITVI05G01471,VITVI06G00104,VITVI06G00487,VITVI06G01328,VITVI06G01460,VITVI07G00311,VITVI07G00490,VITVI08G01493,VITVI09…
GO:BP	regulation of circadian rhythm	GO:0042752	0.0133041	1.87602	29	446	4	35134	VITVI05G00737,VITVI07G00131,VITVI09G00517,VITVI11G00280
GO:BP	nitrogen compound metabolic process	GO:0006807	0.0137182	1.8627	10133	446	161	35134	VITVI10G01207,VITVI07G00060,VITVI10G00191,VITVI02G00564,VITVI16G01246,VITVI04G02280,VITVI10G04301,VITVI07G03056,VITVI07G01423,VITVI01G04336,VITVI01G01496,VITVI01G01682,VITVI01G00303,VITVI01G01995,VITVI01G00521,VITVI01G00862,VITVI01G00626,VITVI02G00633,VITVI02G04001,VITVI02G00009,VITVI02G00424,VITVI02G01153,VITVI02G00475,VITVI03G00361,VITVI03G00618,VITVI03G00675,VITVI04G00186,VITVI04G00380,VITVI04…
GO:BP	cellular response to stimulus	GO:0051716	0.0147726	1.83054	2121	446	45	35134	VITVI01G01995,VITVI02G00009,VITVI02G01153,VITVI02G00475,VITVI04G04448,VITVI04G01665,VITVI04G01746,VITVI05G00737,VITVI05G00067,VITVI06G00104,VITVI06G00374,VITVI06G01091,VITVI06G01298,VITVI07G00359,VITVI07G00149,VITVI08G00768,VITVI09G00655,VITVI09G01250,VITVI10G00510,VITVI10G00604,VITVI11G01396,VITVI11G00430,VITVI12G00306,VITVI12G01981,VITVI12G02545,VITVI13G01126,VITVI13G00114,VITVI13G00710,VITVI13…
GO:BP	negative regulation of macromolecule biosynthetic process	GO:0010558	0.0153399	1.81418	349	446	13	35134	VITVI01G00862,VITVI03G01012,VITVI04G00186,VITVI04G00381,VITVI04G01665,VITVI06G00277,VITVI06G01225,VITVI07G01492,VITVI08G00126,VITVI10G01339,VITVI16G01342,VITVI16G00956,VITVI19G00124
GO:BP	multicellular organism development	GO:0007275	0.0163117	1.7875	851	446	23	35134	VITVI01G00303,VITVI01G00862,VITVI01G00914,VITVI02G00696,VITVI02G00098,VITVI04G00052,VITVI04G00381,VITVI04G01665,VITVI09G00057,VITVI09G00310,VITVI09G01274,VITVI10G00604,VITVI11G00280,VITVI12G00299,VITVI12G00306,VITVI12G00017,VITVI13G01700,VITVI14G00092,VITVI14G01977,VITVI16G00341,VITVI16G00956,VITVI18G00794,VITVI18G00931
GO:BP	transport	GO:0006810	0.0163117	1.7875	2703	446	54	35134	VITVI07G00060,VITVI01G00669,VITVI10G04301,VITVI07G01381,VITVI01G00039,VITVI01G00862,VITVI01G04177,VITVI02G00726,VITVI02G00857,VITVI02G00222,VITVI03G01012,VITVI04G00050,VITVI04G00109,VITVI04G00167,VITVI04G01235,VITVI04G01746,VITVI05G00710,VITVI05G01956,VITVI05G00873,VITVI05G01765,VITVI05G01471,VITVI06G00104,VITVI06G00487,VITVI06G01328,VITVI06G01460,VITVI07G00311,VITVI07G00490,VITVI08G01493,VITVI09…
GO:BP	glutamine family amino acid catabolic process	GO:0009065	0.0163721	1.78589	14	446	3	35134	VITVI04G00870,VITVI10G00835,VITVI17G01086
GO:BP	regulation of gene expression	GO:0010468	0.0163721	1.78589	2328	446	48	35134	VITVI10G00191,VITVI07G03056,VITVI01G01995,VITVI01G00862,VITVI03G01012,VITVI03G00618,VITVI04G00186,VITVI04G00380,VITVI04G00381,VITVI04G01665,VITVI05G00737,VITVI06G01574,VITVI06G00277,VITVI06G00287,VITVI06G00304,VITVI06G01225,VITVI06G01471,VITVI06G01552,VITVI07G00149,VITVI07G00122,VITVI07G01492,VITVI08G00893,VITVI08G01050,VITVI08G00126,VITVI09G00133,VITVI09G00310,VITVI09G00517,VITVI10G00505,VITVI10…
GO:BP	negative regulation of cellular process	GO:0048523	0.016531	1.7817	545	446	17	35134	VITVI01G00862,VITVI03G01012,VITVI04G00186,VITVI04G00381,VITVI04G01665,VITVI06G00277,VITVI06G01225,VITVI07G00359,VITVI07G02667,VITVI07G01492,VITVI08G00126,VITVI10G00604,VITVI10G01339,VITVI16G01342,VITVI16G00956,VITVI18G00224,VITVI19G00124
GO:BP	negative regulation of cellular metabolic process	GO:0031324	0.0170369	1.76861	403	446	14	35134	VITVI01G00862,VITVI03G01012,VITVI04G00186,VITVI04G00381,VITVI04G01665,VITVI06G00277,VITVI06G01225,VITVI07G02667,VITVI07G01492,VITVI08G00126,VITVI10G01339,VITVI16G01342,VITVI16G00956,VITVI19G00124
GO:BP	negative regulation of cellular biosynthetic process	GO:0031327	0.0171387	1.76602	358	446	13	35134	VITVI01G00862,VITVI03G01012,VITVI04G00186,VITVI04G00381,VITVI04G01665,VITVI06G00277,VITVI06G01225,VITVI07G01492,VITVI08G00126,VITVI10G01339,VITVI16G01342,VITVI16G00956,VITVI19G00124
GO:BP	macromolecule modification	GO:0043412	0.0179029	1.74708	3642	446	68	35134	VITVI10G01207,VITVI07G00060,VITVI16G01246,VITVI04G02280,VITVI07G01423,VITVI01G00521,VITVI01G00862,VITVI01G00626,VITVI02G04001,VITVI03G00361,VITVI03G00675,VITVI04G00186,VITVI04G00380,VITVI04G00381,VITVI04G01665,VITVI05G00120,VITVI05G00067,VITVI06G00020,VITVI06G00104,VITVI06G00287,VITVI06G00347,VITVI06G00374,VITVI06G00474,VITVI06G00814,VITVI07G00630,VITVI07G02667,VITVI08G01204,VITVI08G01509,VITVI08…
GO:BP	negative regulation of biosynthetic process	GO:0009890	0.0179029	1.74708	361	446	13	35134	VITVI01G00862,VITVI03G01012,VITVI04G00186,VITVI04G00381,VITVI04G01665,VITVI06G00277,VITVI06G01225,VITVI07G01492,VITVI08G00126,VITVI10G01339,VITVI16G01342,VITVI16G00956,VITVI19G00124
GO:BP	microtubule polymerization	GO:0046785	0.0181819	1.74036	15	446	3	35134	VITVI07G01958,VITVI08G01759,VITVI18G00847
GO:BP	catabolic process	GO:0009056	0.0184999	1.73283	1556	446	35	35134	VITVI02G00564,VITVI00G04866,VITVI01G01682,VITVI02G04001,VITVI02G00125,VITVI02G00424,VITVI02G00535,VITVI03G01138,VITVI03G01572,VITVI04G01317,VITVI04G04448,VITVI04G00870,VITVI05G00986,VITVI06G00673,VITVI06G01225,VITVI07G02656,VITVI08G01910,VITVI08G01950,VITVI08G00126,VITVI09G01250,VITVI10G00835,VITVI10G00048,VITVI11G00260,VITVI12G02130,VITVI00G04585,VITVI14G03036,VITVI15G00849,VITVI16G00703,VITVI16…
GO:BP	entrainment of circadian clock by photoperiod	GO:0043153	0.0193615	1.71306	4	446	2	35134	VITVI05G00737,VITVI09G00517
GO:BP	circadian regulation of gene expression	GO:0032922	0.0193615	1.71306	4	446	2	35134	VITVI05G00737,VITVI09G00517
GO:BP	sulfur compound catabolic process	GO:0044273	0.0193615	1.71306	4	446	2	35134	VITVI10G00048,VITVI17G01084
GO:BP	cell communication	GO:0007154	0.0193615	1.71306	1329	446	31	35134	VITVI01G01995,VITVI04G01746,VITVI05G00737,VITVI05G00067,VITVI06G00104,VITVI06G00374,VITVI06G01091,VITVI06G01298,VITVI07G00359,VITVI07G00149,VITVI08G00768,VITVI10G00510,VITVI10G00604,VITVI11G01396,VITVI12G00306,VITVI12G02545,VITVI13G01126,VITVI13G00114,VITVI13G00710,VITVI13G00715,VITVI00G04585,VITVI14G01991,VITVI14G01992,VITVI14G04601,VITVI17G00175,VITVI17G00225,VITVI17G00762,VITVI18G00224,VITVI18…
GO:BP	glutamate metabolic process	GO:0006536	0.02024	1.69379	16	446	3	35134	VITVI04G00870,VITVI10G00835,VITVI17G01086
GO:BP	small molecule metabolic process	GO:0044281	0.0210133	1.67751	1516	446	34	35134	VITVI01G01682,VITVI01G00303,VITVI02G00633,VITVI03G01138,VITVI03G01017,VITVI03G00361,VITVI04G00249,VITVI04G00870,VITVI05G01878,VITVI05G01094,VITVI06G00396,VITVI06G00407,VITVI06G00673,VITVI06G00676,VITVI10G00835,VITVI10G01098,VITVI10G00048,VITVI10G01613,VITVI11G00260,VITVI12G00306,VITVI13G00594,VITVI13G00005,VITVI13G00128,VITVI13G00715,VITVI14G04419,VITVI16G01036,VITVI17G01084,VITVI17G01086,VITVI17…
GO:BP	localization	GO:0051179	0.0224217	1.64933	2837	446	55	35134	VITVI07G00060,VITVI01G00669,VITVI10G04301,VITVI07G01381,VITVI01G00039,VITVI01G00862,VITVI01G04177,VITVI02G00726,VITVI02G00857,VITVI02G00222,VITVI03G01012,VITVI04G00050,VITVI04G00109,VITVI04G00167,VITVI04G01235,VITVI04G01746,VITVI05G00710,VITVI05G01956,VITVI05G00873,VITVI05G01765,VITVI05G01471,VITVI06G00104,VITVI06G00487,VITVI06G01328,VITVI06G01460,VITVI07G00311,VITVI07G00490,VITVI08G01493,VITVI09…
GO:BP	response to lipid	GO:0033993	0.0232766	1.63308	287	446	11	35134	VITVI02G01721,VITVI05G00067,VITVI07G00149,VITVI08G00768,VITVI10G00604,VITVI10G00835,VITVI11G00280,VITVI12G01657,VITVI13G00114,VITVI18G00638,VITVI18G00072
GO:BP	regulation of catalytic activity	GO:0050790	0.0260086	1.58488	248	446	10	35134	VITVI01G00487,VITVI02G00222,VITVI03G00675,VITVI05G00067,VITVI06G01114,VITVI07G02667,VITVI08G00768,VITVI13G00114,VITVI18G01069,VITVI19G00518
GO:BP	spindle organization	GO:0007051	0.0282325	1.54925	66	446	5	35134	VITVI06G01225,VITVI07G01958,VITVI08G01759,VITVI15G00149,VITVI18G00847
GO:BP	cellular response to nutrient levels	GO:0031669	0.0282325	1.54925	66	446	5	35134	VITVI06G01091,VITVI06G01298,VITVI13G00710,VITVI14G01991,VITVI14G01992
GO:BP	reproductive structure development	GO:0048608	0.0282578	1.54886	389	446	13	35134	VITVI01G00303,VITVI01G00862,VITVI01G00914,VITVI02G00696,VITVI04G00052,VITVI04G00381,VITVI09G00310,VITVI09G01274,VITVI11G00280,VITVI13G01700,VITVI16G00341,VITVI16G00956,VITVI18G00794
GO:BP	regulation of starch biosynthetic process	GO:0010581	0.0282578	1.54886	5	446	2	35134	VITVI01G00914,VITVI04G00498
GO:BP	sexual reproduction	GO:0019953	0.0284874	1.54535	133	446	7	35134	VITVI02G01153,VITVI04G00498,VITVI06G01225,VITVI07G01958,VITVI08G01759,VITVI13G02064,VITVI18G00847
GO:BP	regulation of response to stimulus	GO:0048583	0.028581	1.54392	298	446	11	35134	VITVI10G00245,VITVI04G00052,VITVI06G00676,VITVI06G01225,VITVI07G00359,VITVI10G00604,VITVI11G00280,VITVI14G01722,VITVI16G00703,VITVI16G00956,VITVI18G00638
GO:BP	reproductive system development	GO:0061458	0.029142	1.53548	393	446	13	35134	VITVI01G00303,VITVI01G00862,VITVI01G00914,VITVI02G00696,VITVI04G00052,VITVI04G00381,VITVI09G00310,VITVI09G01274,VITVI11G00280,VITVI13G01700,VITVI16G00341,VITVI16G00956,VITVI18G00794
GO:BP	developmental process	GO:0032502	0.029142	1.53548	1146	446	27	35134	VITVI10G00462,VITVI01G00303,VITVI01G00862,VITVI01G00914,VITVI02G00696,VITVI02G00098,VITVI04G00052,VITVI04G00381,VITVI04G01665,VITVI06G01471,VITVI09G00057,VITVI09G00310,VITVI09G01274,VITVI10G00604,VITVI11G00280,VITVI12G00299,VITVI12G00306,VITVI12G00017,VITVI13G01700,VITVI14G00092,VITVI14G01646,VITVI14G01977,VITVI16G00341,VITVI16G00956,VITVI17G00762,VITVI18G00794,VITVI18G00931
GO:BP	regulation of molecular function	GO:0065009	0.029142	1.53548	255	446	10	35134	VITVI01G00487,VITVI02G00222,VITVI03G00675,VITVI05G00067,VITVI06G01114,VITVI07G02667,VITVI08G00768,VITVI13G00114,VITVI18G01069,VITVI19G00518
GO:BP	glutamine family amino acid metabolic process	GO:0009064	0.0291487	1.53538	68	446	5	35134	VITVI04G00870,VITVI10G00835,VITVI13G00594,VITVI14G04419,VITVI17G01086
GO:BP	response to organic substance	GO:0010033	0.0291917	1.53474	1033	446	25	35134	VITVI02G01721,VITVI01G01995,VITVI01G01711,VITVI04G04448,VITVI04G01746,VITVI05G00067,VITVI06G01298,VITVI07G00359,VITVI07G00149,VITVI08G00768,VITVI10G00510,VITVI10G00604,VITVI10G00835,VITVI11G00280,VITVI11G00539,VITVI12G01657,VITVI12G00619,VITVI13G01126,VITVI13G00114,VITVI00G04585,VITVI17G00748,VITVI18G00337,VITVI18G00638,VITVI18G00794,VITVI18G00072
GO:BP	protein polymerization	GO:0051258	0.0292244	1.53425	41	446	4	35134	VITVI07G01958,VITVI08G01759,VITVI13G01852,VITVI18G00847
GO:BP	organonitrogen compound catabolic process	GO:1901565	0.0307949	1.51152	706	446	19	35134	VITVI01G01682,VITVI02G04001,VITVI04G00870,VITVI05G00986,VITVI06G00673,VITVI07G02656,VITVI08G01910,VITVI09G01250,VITVI10G00835,VITVI10G00048,VITVI12G02130,VITVI00G04585,VITVI15G00849,VITVI16G00703,VITVI17G01084,VITVI17G01086,VITVI17G00748,VITVI18G02993,VITVI19G04218
GO:BP	organic substance catabolic process	GO:1901575	0.0307949	1.51152	1451	446	32	35134	VITVI00G04866,VITVI01G01682,VITVI02G04001,VITVI02G00125,VITVI02G00424,VITVI03G01138,VITVI03G01572,VITVI04G01317,VITVI04G04448,VITVI04G00870,VITVI05G00986,VITVI06G00673,VITVI06G01225,VITVI07G02656,VITVI08G01910,VITVI08G01950,VITVI08G00126,VITVI09G01250,VITVI10G00835,VITVI10G00048,VITVI11G00260,VITVI12G02130,VITVI00G04585,VITVI15G00849,VITVI16G00703,VITVI16G01418,VITVI17G01084,VITVI17G01086,VITVI17…
GO:BP	multicellular organismal process	GO:0032501	0.0307969	1.51149	928	446	23	35134	VITVI01G00303,VITVI01G00862,VITVI01G00914,VITVI02G00696,VITVI02G00098,VITVI04G00052,VITVI04G00381,VITVI04G01665,VITVI09G00057,VITVI09G00310,VITVI09G01274,VITVI10G00604,VITVI11G00280,VITVI12G00299,VITVI12G00306,VITVI12G00017,VITVI13G01700,VITVI14G00092,VITVI14G01977,VITVI16G00341,VITVI16G00956,VITVI18G00794,VITVI18G00931
GO:BP	starch metabolic process	GO:0005982	0.0307969	1.51149	42	446	4	35134	VITVI01G00914,VITVI04G00498,VITVI05G00607,VITVI10G00739
GO:BP	regulation of reproductive process	GO:2000241	0.0316692	1.49936	103	446	6	35134	VITVI01G00914,VITVI02G00696,VITVI04G00052,VITVI09G01274,VITVI11G00280,VITVI16G00341
GO:BP	response to brassinosteroid	GO:0009741	0.0325323	1.48769	43	446	4	35134	VITVI07G00149,VITVI10G00604,VITVI10G00835,VITVI18G00638
GO:BP	response to nutrient levels	GO:0031667	0.0325323	1.48769	104	446	6	35134	VITVI06G00676,VITVI06G01091,VITVI06G01298,VITVI13G00710,VITVI14G01991,VITVI14G01992
GO:BP	response to hormone	GO:0009725	0.0329082	1.4827	769	446	20	35134	VITVI02G01721,VITVI01G01995,VITVI01G01711,VITVI04G01746,VITVI05G00067,VITVI07G00359,VITVI07G00149,VITVI08G00768,VITVI10G00510,VITVI10G00604,VITVI10G00835,VITVI11G00280,VITVI11G00539,VITVI12G01657,VITVI13G01126,VITVI13G00114,VITVI00G04585,VITVI18G00337,VITVI18G00638,VITVI18G00072
GO:BP	anatomical structure arrangement	GO:0048532	0.0329619	1.48199	21	446	3	35134	VITVI04G01665,VITVI09G00310,VITVI13G01700
GO:BP	response to sucrose	GO:0009744	0.0329619	1.48199	21	446	3	35134	VITVI06G01298,VITVI11G00539,VITVI18G00794
GO:BP	meristem structural organization	GO:0009933	0.0329619	1.48199	21	446	3	35134	VITVI04G01665,VITVI09G00310,VITVI13G01700
GO:BP	response to endogenous stimulus	GO:0009719	0.0339683	1.46893	774	446	20	35134	VITVI02G01721,VITVI01G01995,VITVI01G01711,VITVI04G01746,VITVI05G00067,VITVI07G00359,VITVI07G00149,VITVI08G00768,VITVI10G00510,VITVI10G00604,VITVI10G00835,VITVI11G00280,VITVI11G00539,VITVI12G01657,VITVI13G01126,VITVI13G00114,VITVI00G04585,VITVI18G00337,VITVI18G00638,VITVI18G00072
GO:BP	carbohydrate metabolic process	GO:0005975	0.0357055	1.44727	1178	446	27	35134	VITVI10G00462,VITVI00G04866,VITVI01G00066,VITVI01G00303,VITVI01G00914,VITVI02G00125,VITVI03G01138,VITVI03G01572,VITVI04G00249,VITVI04G00498,VITVI05G00607,VITVI05G00986,VITVI06G00676,VITVI07G02198,VITVI08G01950,VITVI10G00739,VITVI10G01123,VITVI11G00260,VITVI12G00020,VITVI15G01026,VITVI16G00519,VITVI16G01418,VITVI17G00178,VITVI17G00234,VITVI17G00748,VITVI18G00446,VITVI18G00591
GO:BP	response to disaccharide	GO:0034285	0.0362972	1.44013	22	446	3	35134	VITVI06G01298,VITVI11G00539,VITVI18G00794
GO:BP	cellular response to phosphate starvation	GO:0016036	0.0362972	1.44013	22	446	3	35134	VITVI13G00710,VITVI14G01991,VITVI14G01992
GO:BP	cellular response to extracellular stimulus	GO:0031668	0.0365383	1.43725	75	446	5	35134	VITVI06G01091,VITVI06G01298,VITVI13G00710,VITVI14G01991,VITVI14G01992
GO:BP	cellular response to external stimulus	GO:0071496	0.0365383	1.43725	75	446	5	35134	VITVI06G01091,VITVI06G01298,VITVI13G00710,VITVI14G01991,VITVI14G01992
GO:BP	microtubule cytoskeleton organization	GO:0000226	0.0369108	1.43285	147	446	7	35134	VITVI06G01225,VITVI07G01958,VITVI08G01759,VITVI11G00341,VITVI12G00619,VITVI15G00149,VITVI18G00847
GO:BP	tissue development	GO:0009888	0.0369108	1.43285	187	446	8	35134	VITVI01G00914,VITVI02G00696,VITVI04G01665,VITVI09G00310,VITVI10G00604,VITVI13G01700,VITVI14G01646,VITVI18G00931
GO:BP	response to external stimulus	GO:0009605	0.0369108	1.43285	1011	446	24	35134	VITVI10G00245,VITVI03G01012,VITVI05G00737,VITVI06G00676,VITVI06G00814,VITVI06G01091,VITVI06G01298,VITVI08G01759,VITVI09G01565,VITVI09G00517,VITVI10G01339,VITVI10G00048,VITVI10G01613,VITVI13G00710,VITVI13G02349,VITVI13G02361,VITVI13G01626,VITVI13G04663,VITVI14G01722,VITVI14G01991,VITVI14G01992,VITVI16G00703,VITVI17G01373,VITVI18G00850
GO:BP	response to carbohydrate	GO:0009743	0.0369108	1.43285	46	446	4	35134	VITVI06G01298,VITVI11G00280,VITVI11G00539,VITVI18G00794
GO:BP	regulation of fatty acid metabolic process	GO:0019217	0.0419897	1.37686	7	446	2	35134	VITVI10G00048,VITVI12G00306
GO:BP	transmembrane transport	GO:0055085	0.0424681	1.37194	1627	446	34	35134	VITVI10G04301,VITVI07G01381,VITVI01G00039,VITVI02G00726,VITVI03G01012,VITVI04G00109,VITVI04G00167,VITVI04G01235,VITVI04G01746,VITVI05G00710,VITVI05G01956,VITVI05G00873,VITVI05G01471,VITVI07G00311,VITVI07G00490,VITVI08G01493,VITVI09G00758,VITVI09G01129,VITVI09G01947,VITVI10G04409,VITVI10G00777,VITVI11G00967,VITVI12G00306,VITVI12G04293,VITVI13G00562,VITVI13G00677,VITVI14G01739,VITVI14G01992,VITVI15…
GO:BP	lipid modification	GO:0030258	0.0426497	1.37008	114	446	6	35134	VITVI01G00541,VITVI02G00402,VITVI08G01783,VITVI10G00048,VITVI14G00528,VITVI18G00794
GO:BP	response to extracellular stimulus	GO:0009991	0.0426497	1.37008	114	446	6	35134	VITVI06G00676,VITVI06G01091,VITVI06G01298,VITVI13G00710,VITVI14G01991,VITVI14G01992
GO:BP	phospholipid dephosphorylation	GO:0046839	0.0426497	1.37008	24	446	3	35134	VITVI01G00541,VITVI08G01783,VITVI14G00528
GO:BP	system development	GO:0048731	0.0475682	1.32268	642	446	17	35134	VITVI01G00303,VITVI01G00862,VITVI01G00914,VITVI02G00696,VITVI04G00052,VITVI04G00381,VITVI04G01665,VITVI09G00310,VITVI09G01274,VITVI10G00604,VITVI11G00280,VITVI13G01700,VITVI14G01977,VITVI16G00341,VITVI16G00956,VITVI18G00794,VITVI18G00931
GO:CC	cellular_component	GO:0005575	1.40004e-13	12.8539	17597	446	307	35134	VITVI10G01207,VITVI07G02482,VITVI07G00060,VITVI10G00191,VITVI01G00669,VITVI02G00564,VITVI16G01246,VITVI10G00462,VITVI02G01721,VITVI10G04301,VITVI07G03056,VITVI07G01381,VITVI01G04336,VITVI01G01400,VITVI01G01496,VITVI01G01682,VITVI01G00039,VITVI01G00062,VITVI01G00303,VITVI01G00487,VITVI01G01995,VITVI01G00521,VITVI01G00862,VITVI01G00914,VITVI01G04177,VITVI01G01793,VITVI02G00633,VITVI02G00726,VITVI02…
GO:CC	cellular anatomical entity	GO:0110165	7.44116e-13	12.1284	17432	446	302	35134	VITVI10G01207,VITVI07G02482,VITVI07G00060,VITVI10G00191,VITVI01G00669,VITVI02G00564,VITVI16G01246,VITVI10G00462,VITVI02G01721,VITVI10G04301,VITVI07G03056,VITVI07G01381,VITVI01G04336,VITVI01G01400,VITVI01G01496,VITVI01G01682,VITVI01G00039,VITVI01G00062,VITVI01G00303,VITVI01G00487,VITVI01G01995,VITVI01G00521,VITVI01G00862,VITVI01G00914,VITVI01G04177,VITVI01G01793,VITVI02G00633,VITVI02G00726,VITVI02…
GO:CC	intracellular anatomical structure	GO:0005622	5.60589e-12	11.2514	10380	446	206	35134	VITVI07G00060,VITVI10G00191,VITVI01G00669,VITVI02G01721,VITVI10G04301,VITVI07G03056,VITVI07G01381,VITVI01G04336,VITVI01G01496,VITVI01G01682,VITVI01G00303,VITVI01G00487,VITVI01G01995,VITVI01G00862,VITVI01G00914,VITVI01G04177,VITVI01G01793,VITVI02G00633,VITVI02G00857,VITVI02G04001,VITVI02G00009,VITVI02G00037,VITVI02G00059,VITVI02G00402,VITVI02G00978,VITVI02G01153,VITVI02G00535,VITVI02G01770,VITVI03…
GO:CC	intracellular membrane-bounded organelle	GO:0043231	1.74567e-08	7.75804	7998	446	159	35134	VITVI07G00060,VITVI10G00191,VITVI01G00669,VITVI02G01721,VITVI10G04301,VITVI07G03056,VITVI07G01381,VITVI01G01496,VITVI01G01682,VITVI01G00487,VITVI01G00862,VITVI01G00914,VITVI01G04177,VITVI01G01793,VITVI02G00857,VITVI02G04001,VITVI02G00009,VITVI02G00037,VITVI02G00059,VITVI02G00402,VITVI02G00978,VITVI02G01153,VITVI02G00535,VITVI02G01770,VITVI03G01017,VITVI03G00618,VITVI03G00675,VITVI04G00050,VITVI04…
GO:CC	organelle	GO:0043226	1.74567e-08	7.75804	8827	446	171	35134	VITVI07G00060,VITVI10G00191,VITVI01G00669,VITVI02G01721,VITVI10G04301,VITVI07G03056,VITVI07G01381,VITVI01G01496,VITVI01G01682,VITVI01G00487,VITVI01G01995,VITVI01G00862,VITVI01G00914,VITVI01G04177,VITVI01G01793,VITVI02G00857,VITVI02G04001,VITVI02G00009,VITVI02G00037,VITVI02G00059,VITVI02G00402,VITVI02G00978,VITVI02G01153,VITVI02G00535,VITVI02G01770,VITVI03G01017,VITVI03G00618,VITVI03G00675,VITVI04…
GO:CC	intracellular organelle	GO:0043229	1.74567e-08	7.75804	8795	446	171	35134	VITVI07G00060,VITVI10G00191,VITVI01G00669,VITVI02G01721,VITVI10G04301,VITVI07G03056,VITVI07G01381,VITVI01G01496,VITVI01G01682,VITVI01G00487,VITVI01G01995,VITVI01G00862,VITVI01G00914,VITVI01G04177,VITVI01G01793,VITVI02G00857,VITVI02G04001,VITVI02G00009,VITVI02G00037,VITVI02G00059,VITVI02G00402,VITVI02G00978,VITVI02G01153,VITVI02G00535,VITVI02G01770,VITVI03G01017,VITVI03G00618,VITVI03G00675,VITVI04…
GO:CC	membrane-bounded organelle	GO:0043227	2.20942e-08	7.65572	8046	446	159	35134	VITVI07G00060,VITVI10G00191,VITVI01G00669,VITVI02G01721,VITVI10G04301,VITVI07G03056,VITVI07G01381,VITVI01G01496,VITVI01G01682,VITVI01G00487,VITVI01G00862,VITVI01G00914,VITVI01G04177,VITVI01G01793,VITVI02G00857,VITVI02G04001,VITVI02G00009,VITVI02G00037,VITVI02G00059,VITVI02G00402,VITVI02G00978,VITVI02G01153,VITVI02G00535,VITVI02G01770,VITVI03G01017,VITVI03G00618,VITVI03G00675,VITVI04G00050,VITVI04…
GO:CC	cytoplasm	GO:0005737	2.41807e-07	6.61653	6370	446	130	35134	VITVI07G00060,VITVI01G00669,VITVI07G01381,VITVI01G04336,VITVI01G01496,VITVI01G01682,VITVI01G00303,VITVI01G00487,VITVI01G00862,VITVI01G00914,VITVI01G04177,VITVI01G01793,VITVI02G00633,VITVI02G00857,VITVI02G00059,VITVI02G00402,VITVI02G00978,VITVI02G00535,VITVI03G01138,VITVI03G01017,VITVI03G00476,VITVI03G00675,VITVI04G00050,VITVI04G00186,VITVI04G00249,VITVI04G00290,VITVI04G00498,VITVI04G04448,VITVI04…
GO:CC	nucleus	GO:0005634	1.59741e-06	5.79658	4387	446	96	35134	VITVI10G00191,VITVI02G01721,VITVI10G04301,VITVI07G03056,VITVI01G00862,VITVI01G01793,VITVI02G04001,VITVI02G00009,VITVI02G00037,VITVI02G01153,VITVI02G01770,VITVI03G00618,VITVI03G00675,VITVI04G00186,VITVI04G00380,VITVI04G00381,VITVI04G01477,VITVI04G01665,VITVI05G00449,VITVI05G00737,VITVI05G01765,VITVI05G00067,VITVI05G01684,VITVI06G01574,VITVI06G00104,VITVI06G00287,VITVI06G00304,VITVI06G00374,VITVI06…
GO:CC	equatorial microtubule organizing center	GO:0000923	0.000518387	3.28535	5	446	3	35134	VITVI07G01958,VITVI08G01759,VITVI18G00847
GO:CC	spindle pole	GO:0000922	0.000933619	3.02983	6	446	3	35134	VITVI07G01958,VITVI08G01759,VITVI18G00847
GO:CC	cytosol	GO:0005829	0.00214412	2.66875	1109	446	30	35134	VITVI01G04336,VITVI01G00303,VITVI03G01138,VITVI03G00476,VITVI04G00249,VITVI04G00290,VITVI04G00870,VITVI05G01094,VITVI06G00407,VITVI06G00487,VITVI06G00673,VITVI06G00676,VITVI08G01910,VITVI08G01950,VITVI08G01081,VITVI08G00126,VITVI09G01250,VITVI10G00604,VITVI11G00260,VITVI11G00270,VITVI12G01657,VITVI16G00703,VITVI16G01342,VITVI17G01084,VITVI17G01086,VITVI17G00826,VITVI17G00856,VITVI18G00591,VITVI18…
GO:CC	membrane	GO:0016020	0.00242257	2.61572	9855	446	161	35134	VITVI10G01207,VITVI07G02482,VITVI07G00060,VITVI01G00669,VITVI16G01246,VITVI10G00462,VITVI10G04301,VITVI07G01381,VITVI01G01400,VITVI01G01496,VITVI01G00039,VITVI01G00062,VITVI01G00487,VITVI01G00521,VITVI02G00726,VITVI02G00855,VITVI02G00857,VITVI02G00059,VITVI02G00125,VITVI02G00222,VITVI02G00402,VITVI02G00424,VITVI02G00535,VITVI02G00538,VITVI02G01770,VITVI03G01138,VITVI03G01012,VITVI03G01017,VITVI03…
GO:CC	transferase complex	GO:1990234	0.0027681	2.55782	576	446	19	35134	VITVI10G00462,VITVI01G00487,VITVI02G00633,VITVI02G00009,VITVI03G00618,VITVI03G00675,VITVI04G00380,VITVI05G00358,VITVI05G00449,VITVI06G00287,VITVI06G01091,VITVI07G02656,VITVI00G04585,VITVI14G01739,VITVI15G00849,VITVI16G00527,VITVI16G00703,VITVI18G01045,VITVI18G02993
GO:CC	gamma-tubulin complex	GO:0000930	0.0027681	2.55782	9	446	3	35134	VITVI07G01958,VITVI08G01759,VITVI18G00847
GO:CC	cell division site	GO:0032153	0.0027681	2.55782	9	446	3	35134	VITVI07G01958,VITVI08G01759,VITVI18G00847
GO:CC	histone acetyltransferase complex	GO:0000123	0.00440245	2.35631	46	446	5	35134	VITVI03G00618,VITVI04G00380,VITVI05G00358,VITVI06G00287,VITVI18G01045
GO:CC	protein acetyltransferase complex	GO:0031248	0.00836377	2.0776	54	446	5	35134	VITVI03G00618,VITVI04G00380,VITVI05G00358,VITVI06G00287,VITVI18G01045
GO:CC	acetyltransferase complex	GO:1902493	0.00836377	2.0776	54	446	5	35134	VITVI03G00618,VITVI04G00380,VITVI05G00358,VITVI06G00287,VITVI18G01045
GO:CC	supramolecular complex	GO:0099080	0.0150238	1.82322	330	446	12	35134	VITVI01G00862,VITVI02G00535,VITVI04G00050,VITVI06G01225,VITVI07G01958,VITVI08G01759,VITVI09G00130,VITVI11G00341,VITVI12G01657,VITVI15G00149,VITVI18G00847,VITVI18G01142
GO:CC	plasma membrane	GO:0005886	0.0154956	1.80979	1412	446	32	35134	VITVI10G01207,VITVI10G00462,VITVI10G04301,VITVI02G00857,VITVI02G00424,VITVI03G01012,VITVI04G00050,VITVI04G00109,VITVI04G04448,VITVI05G00710,VITVI05G00873,VITVI06G00374,VITVI07G02053,VITVI08G01509,VITVI08G01759,VITVI08G00768,VITVI10G00604,VITVI10G00048,VITVI10G01613,VITVI11G00523,VITVI13G00114,VITVI13G01626,VITVI13G01852,VITVI14G00092,VITVI14G01992,VITVI16G00703,VITVI16G01164,VITVI17G00175,VITVI17…
GO:CC	cytoskeleton	GO:0005856	0.0155866	1.80725	385	446	13	35134	VITVI02G00535,VITVI04G00050,VITVI07G01958,VITVI08G01759,VITVI08G00799,VITVI11G00341,VITVI12G01657,VITVI13G01973,VITVI15G00149,VITVI17G01084,VITVI17G00762,VITVI18G00847,VITVI18G01142
GO:CC	protein-containing complex	GO:0032991	0.0155866	1.80725	2986	446	57	35134	VITVI07G00060,VITVI01G00669,VITVI10G00462,VITVI10G04301,VITVI01G00487,VITVI02G00633,VITVI02G00009,VITVI02G01153,VITVI03G01012,VITVI03G00618,VITVI03G00675,VITVI04G00050,VITVI04G00380,VITVI04G00381,VITVI04G01477,VITVI04G01665,VITVI05G00358,VITVI05G00449,VITVI05G01684,VITVI06G00287,VITVI06G00382,VITVI06G00990,VITVI06G01091,VITVI06G01225,VITVI06G01328,VITVI06G01552,VITVI07G00630,VITVI07G02656,VITVI07…
GO:CC	H4 histone acetyltransferase complex	GO:1902562	0.0155866	1.80725	18	446	3	35134	VITVI04G00380,VITVI06G00287,VITVI18G01045
GO:CC	nucleotide-excision repair complex	GO:0000109	0.0163032	1.78773	5	446	2	35134	VITVI02G00009,VITVI14G00274
GO:CC	microtubule organizing center	GO:0005815	0.0169252	1.77147	19	446	3	35134	VITVI07G01958,VITVI08G01759,VITVI18G00847
GO:CC	cytoplasmic vesicle	GO:0031410	0.0236904	1.62543	363	446	12	35134	VITVI07G00060,VITVI01G00669,VITVI01G00487,VITVI02G00857,VITVI04G00050,VITVI06G01328,VITVI08G01509,VITVI09G00057,VITVI09G00326,VITVI11G00523,VITVI17G00302,VITVI17G00762
GO:CC	intracellular vesicle	GO:0097708	0.0236904	1.62543	363	446	12	35134	VITVI07G00060,VITVI01G00669,VITVI01G00487,VITVI02G00857,VITVI04G00050,VITVI06G01328,VITVI08G01509,VITVI09G00057,VITVI09G00326,VITVI11G00523,VITVI17G00302,VITVI17G00762
GO:CC	cell periphery	GO:0071944	0.0254759	1.59387	1673	446	35	35134	VITVI10G01207,VITVI02G00564,VITVI10G00462,VITVI10G04301,VITVI02G00857,VITVI02G00424,VITVI03G01012,VITVI04G00050,VITVI04G00109,VITVI04G04448,VITVI05G00710,VITVI05G00873,VITVI06G00374,VITVI07G02053,VITVI08G01509,VITVI08G01759,VITVI08G00768,VITVI10G00604,VITVI10G00048,VITVI10G01613,VITVI11G00523,VITVI13G00114,VITVI13G01626,VITVI13G01852,VITVI14G00092,VITVI14G03036,VITVI14G01977,VITVI14G01992,VITVI16…
GO:CC	trans-Golgi network membrane	GO:0032588	0.0280536	1.55201	7	446	2	35134	VITVI02G00857,VITVI09G00326
GO:CC	intracellular protein-containing complex	GO:0140535	0.0317926	1.49767	591	446	16	35134	VITVI02G00009,VITVI03G00618,VITVI04G00380,VITVI05G00358,VITVI05G00449,VITVI06G00287,VITVI06G00990,VITVI06G01091,VITVI07G02656,VITVI11G00723,VITVI00G04585,VITVI15G00849,VITVI16G00527,VITVI16G00703,VITVI18G01045,VITVI18G02993
GO:CC	polymeric cytoskeletal fiber	GO:0099513	0.0317926	1.49767	242	446	9	35134	VITVI02G00535,VITVI04G00050,VITVI07G01958,VITVI08G01759,VITVI11G00341,VITVI12G01657,VITVI15G00149,VITVI18G00847,VITVI18G01142
GO:CC	protein phosphatase type 2A complex	GO:0000159	0.0317926	1.49767	26	446	3	35134	VITVI07G00630,VITVI14G04601,VITVI17G00856
GO:CC	extrinsic component of organelle membrane	GO:0031312	0.0317926	1.49767	8	446	2	35134	VITVI01G01496,VITVI03G01017
GO:CC	transcription preinitiation complex	GO:0097550	0.0317926	1.49767	8	446	2	35134	VITVI02G00009,VITVI08G01943
GO:CC	phosphatase complex	GO:1903293	0.0341818	1.46621	28	446	3	35134	VITVI07G00630,VITVI14G04601,VITVI17G00856
GO:CC	supramolecular fiber	GO:0099512	0.0341818	1.46621	252	446	9	35134	VITVI02G00535,VITVI04G00050,VITVI07G01958,VITVI08G01759,VITVI11G00341,VITVI12G01657,VITVI15G00149,VITVI18G00847,VITVI18G01142
GO:CC	supramolecular polymer	GO:0099081	0.0341818	1.46621	252	446	9	35134	VITVI02G00535,VITVI04G00050,VITVI07G01958,VITVI08G01759,VITVI11G00341,VITVI12G01657,VITVI15G00149,VITVI18G00847,VITVI18G01142
GO:CC	protein serine/threonine phosphatase complex	GO:0008287	0.0341818	1.46621	28	446	3	35134	VITVI07G00630,VITVI14G04601,VITVI17G00856
GO:CC	spindle	GO:0005819	0.0341818	1.46621	54	446	4	35134	VITVI07G01958,VITVI08G01759,VITVI15G00149,VITVI18G00847
GO:CC	vesicle	GO:0031982	0.0355497	1.44916	401	446	12	35134	VITVI07G00060,VITVI01G00669,VITVI01G00487,VITVI02G00857,VITVI04G00050,VITVI06G01328,VITVI08G01509,VITVI09G00057,VITVI09G00326,VITVI11G00523,VITVI17G00302,VITVI17G00762
GO:CC	protein-DNA complex	GO:0032993	0.0390784	1.40806	261	446	9	35134	VITVI02G00009,VITVI02G01153,VITVI03G00618,VITVI04G00380,VITVI05G00358,VITVI06G00287,VITVI06G00382,VITVI08G01943,VITVI18G01045
GO:CC	cytoplasmic stress granule	GO:0010494	0.0390784	1.40806	10	446	2	35134	VITVI01G00862,VITVI09G00130
GO:CC	endomembrane system	GO:0012505	0.0390784	1.40806	1455	446	30	35134	VITVI07G00060,VITVI07G01381,VITVI01G01682,VITVI01G00487,VITVI01G04177,VITVI02G00855,VITVI02G00857,VITVI02G00059,VITVI02G00402,VITVI02G00978,VITVI04G00050,VITVI05G01878,VITVI06G01328,VITVI07G00359,VITVI08G01509,VITVI08G01759,VITVI08G01783,VITVI09G00057,VITVI09G00326,VITVI09G01947,VITVI11G00523,VITVI12G00020,VITVI13G00710,VITVI14G01739,VITVI14G01820,VITVI14G01992,VITVI17G00302,VITVI17G00748,VITVI18…
GO:CC	Ino80 complex	GO:0031011	0.0390784	1.40806	30	446	3	35134	VITVI06G00287,VITVI06G00382,VITVI18G01045
GO:CC	catalytic complex	GO:1902494	0.043639	1.36013	1161	446	25	35134	VITVI10G00462,VITVI01G00487,VITVI02G00633,VITVI02G00009,VITVI03G00618,VITVI03G00675,VITVI04G00380,VITVI05G00358,VITVI05G00449,VITVI06G00287,VITVI06G00382,VITVI06G01091,VITVI06G01225,VITVI07G00630,VITVI07G02656,VITVI08G01950,VITVI00G04585,VITVI14G01739,VITVI14G04601,VITVI15G00849,VITVI16G00527,VITVI16G00703,VITVI17G00856,VITVI18G01045,VITVI18G02993
KEGG	KEGG root term	KEGG:00000	7.96081e-07	6.09904	2608	446	68	35134	VITVI07G00060,VITVI07G01255,VITVI01G01682,VITVI01G00066,VITVI01G00303,VITVI02G00633,VITVI02G00726,VITVI02G04001,VITVI02G00009,VITVI02G00125,VITVI02G00402,VITVI02G00424,VITVI02G01153,VITVI03G01097,VITVI03G01138,VITVI03G01572,VITVI04G00167,VITVI04G00249,VITVI04G00870,VITVI05G00449,VITVI05G01094,VITVI05G00737,VITVI05G01765,VITVI06G00407,VITVI06G00673,VITVI06G00676,VITVI06G00956,VITVI06G01328,VITVI06…
KEGG	MAPK signaling pathway - plant	KEGG:04016	0.00316731	2.49931	84	446	7	35134	VITVI04G00167,VITVI07G00359,VITVI08G00768,VITVI12G01449,VITVI13G01126,VITVI13G00114,VITVI18G01265
KEGG	Metabolic pathways	KEGG:01100	0.00462003	2.33536	1235	446	31	35134	VITVI07G01255,VITVI01G01682,VITVI01G00066,VITVI01G00303,VITVI02G00633,VITVI02G00125,VITVI02G00402,VITVI02G00424,VITVI03G01097,VITVI03G01138,VITVI03G01572,VITVI04G00249,VITVI04G00870,VITVI05G01094,VITVI06G00407,VITVI06G00673,VITVI06G00676,VITVI06G00956,VITVI08G02226,VITVI10G00739,VITVI10G00048,VITVI11G00260,VITVI14G01820,VITVI15G01026,VITVI17G01084,VITVI17G01086,VITVI17G00234,VITVI18G00320,VITVI18…
KEGG	Starch and sucrose metabolism	KEGG:00500	0.00462003	2.33536	71	446	6	35134	VITVI01G00066,VITVI02G00125,VITVI03G01572,VITVI10G00739,VITVI11G00260,VITVI17G00234
KEGG	Biosynthesis of secondary metabolites	KEGG:01110	0.0164432	1.78401	681	446	19	35134	VITVI07G01255,VITVI01G00066,VITVI02G00633,VITVI02G00402,VITVI02G00424,VITVI03G01572,VITVI04G00870,VITVI06G00407,VITVI06G00673,VITVI06G00956,VITVI06G01930,VITVI08G01950,VITVI10G00739,VITVI11G00260,VITVI15G01026,VITVI17G01086,VITVI17G00234,VITVI18G00706,VITVI18G02485
KEGG	Amino sugar and nucleotide sugar metabolism	KEGG:00520	0.0358919	1.445	79	446	5	35134	VITVI03G01097,VITVI03G01138,VITVI04G00249,VITVI11G00260,VITVI13G01232
KEGG	beta-Alanine metabolism	KEGG:00410	0.0372161	1.42927	30	446	3	35134	VITVI04G00870,VITVI10G00048,VITVI17G01086
KEGG	Ether lipid metabolism	KEGG:00565	0.0372161	1.42927	9	446	2	35134	VITVI02G00402,VITVI02G00424
KEGG	Biosynthesis of nucleotide sugars	KEGG:01250	0.0372161	1.42927	53	446	4	35134	VITVI03G01097,VITVI03G01138,VITVI04G00249,VITVI11G00260
KEGG	Nucleotide excision repair	KEGG:03420	0.0372161	1.42927	27	446	3	35134	VITVI02G00009,VITVI02G01153,VITVI09G01250
KEGG	Endocytosis	KEGG:04144	0.0372161	1.42927	91	446	5	35134	VITVI07G00060,VITVI02G00424,VITVI06G01328,VITVI06G01460,VITVI17G00302
KEGG	Taurine and hypotaurine metabolism	KEGG:00430	0.0382106	1.41782	11	446	2	35134	VITVI04G00870,VITVI17G01086
KEGG	Biosynthesis of various plant secondary metabolites	KEGG:00999	0.0382106	1.41782	32	446	3	35134	VITVI01G00066,VITVI17G00234,VITVI18G00706
KEGG	ABC transporters	KEGG:02010	0.0382106	1.41782	33	446	3	35134	VITVI02G00726,VITVI08G01493,VITVI18G01703

## Sheet: K4_GOterm
Source	Term Name	Term ID	Adjusted P Value	Negative log10 of Adjusted P Value	Term Size	Query Size	Intersection Size	Effective Domain Size	Intersections
GO:MF	molecular_function	GO:0003674	7.55946e-18	17.1215	21589	373	311	35134	VITVI07G00077,VITVI10G00219,VITVI10G00343,VITVI07G01253,VITVI09G02081,VITVI09G02087,VITVI09G02088,VITVI00G04219,VITVI09G02103,VITVI01G02307,VITVI00G04318,VITVI00G00610,VITVI00G00615,VITVI00G04351,VITVI00G04361,VITVI09G02052,VITVI09G02058,VITVI10G04559,VITVI00G04871,VITVI01G01546,VITVI01G01561,VITVI01G01578,VITVI01G02258,VITVI01G01650,VITVI01G00071,VITVI01G01856,VITVI01G00183,VITVI01G00272,VITVI01…
GO:MF	binding	GO:0005488	4.66613e-17	16.331	15172	373	247	35134	VITVI07G00077,VITVI10G00219,VITVI10G00343,VITVI07G01253,VITVI09G02081,VITVI09G02088,VITVI00G04219,VITVI09G02103,VITVI00G04318,VITVI00G00615,VITVI00G04351,VITVI00G04361,VITVI09G02052,VITVI09G02058,VITVI10G04559,VITVI00G04871,VITVI01G01546,VITVI01G01578,VITVI01G01650,VITVI01G00071,VITVI01G01856,VITVI01G00183,VITVI01G00272,VITVI01G01722,VITVI02G00627,VITVI02G01492,VITVI02G00008,VITVI02G00014,VITVI02…
GO:MF	RNA binding	GO:0003723	2.54393e-10	9.59449	1956	373	58	35134	VITVI07G01253,VITVI09G02103,VITVI00G00615,VITVI01G00183,VITVI02G00627,VITVI02G00008,VITVI02G00018,VITVI03G01408,VITVI03G00189,VITVI03G00265,VITVI03G00515,VITVI03G00511,VITVI04G00141,VITVI04G00291,VITVI05G01830,VITVI05G00455,VITVI05G00513,VITVI05G00518,VITVI05G00538,VITVI05G01113,VITVI05G01117,VITVI05G01137,VITVI05G02077,VITVI05G01632,VITVI06G00011,VITVI06G00107,VITVI06G04292,VITVI06G04438,VITVI07…
GO:MF	electron transfer activity	GO:0009055	2.65961e-10	9.57518	162	373	17	35134	VITVI09G02081,VITVI09G02087,VITVI09G02103,VITVI00G04318,VITVI00G00610,VITVI00G04351,VITVI09G02052,VITVI09G02058,VITVI00G04871,VITVI03G04370,VITVI10G04002,VITVI12G00211,VITVI13G00384,VITVI00G04419,VITVI16G00367,VITVI18G00619,VITVI19G00690
GO:MF	heterocyclic compound binding	GO:1901363	5.54891e-10	9.25579	10081	373	169	35134	VITVI07G01253,VITVI09G02081,VITVI09G02088,VITVI00G04219,VITVI09G02103,VITVI00G04318,VITVI00G00615,VITVI00G04361,VITVI10G04559,VITVI00G04871,VITVI01G01546,VITVI01G01578,VITVI01G00183,VITVI01G00272,VITVI01G01722,VITVI02G00627,VITVI02G01492,VITVI02G00008,VITVI02G00018,VITVI02G00097,VITVI02G00137,VITVI02G00992,VITVI02G01139,VITVI03G00164,VITVI03G01408,VITVI03G00189,VITVI03G00222,VITVI03G00239,VITVI03…
GO:MF	organic cyclic compound binding	GO:0097159	5.54891e-10	9.25579	10094	373	169	35134	VITVI07G01253,VITVI09G02081,VITVI09G02088,VITVI00G04219,VITVI09G02103,VITVI00G04318,VITVI00G00615,VITVI00G04361,VITVI10G04559,VITVI00G04871,VITVI01G01546,VITVI01G01578,VITVI01G00183,VITVI01G00272,VITVI01G01722,VITVI02G00627,VITVI02G01492,VITVI02G00008,VITVI02G00018,VITVI02G00097,VITVI02G00137,VITVI02G00992,VITVI02G01139,VITVI03G00164,VITVI03G01408,VITVI03G00189,VITVI03G00222,VITVI03G00239,VITVI03…
GO:MF	oxidoreduction-driven active transmembrane transporter activity	GO:0015453	1.00444e-09	8.99808	41	373	10	35134	VITVI09G02081,VITVI09G02087,VITVI00G00610,VITVI00G04351,VITVI09G02052,VITVI09G02058,VITVI03G04370,VITVI10G04002,VITVI12G00211,VITVI00G04419
GO:MF	protein binding	GO:0005515	1.52202e-08	7.81758	4981	373	99	35134	VITVI10G00219,VITVI10G00343,VITVI07G01253,VITVI01G01578,VITVI01G01650,VITVI01G00071,VITVI01G01856,VITVI02G00008,VITVI02G00014,VITVI02G00018,VITVI02G00992,VITVI03G00189,VITVI03G00511,VITVI03G00447,VITVI03G00355,VITVI03G00718,VITVI03G00858,VITVI04G00141,VITVI04G00291,VITVI04G00316,VITVI04G00555,VITVI04G01024,VITVI05G01864,VITVI05G00513,VITVI05G00518,VITVI05G00538,VITVI05G01113,VITVI05G01117,VITVI05…
GO:MF	ion binding	GO:0043167	3.0425e-08	7.51677	8296	373	141	35134	VITVI07G00077,VITVI10G00219,VITVI09G02103,VITVI00G04318,VITVI00G04351,VITVI00G04361,VITVI10G04559,VITVI00G04871,VITVI01G01546,VITVI01G01578,VITVI01G01650,VITVI01G00183,VITVI01G00272,VITVI02G00627,VITVI02G01492,VITVI02G00097,VITVI02G00137,VITVI02G00992,VITVI02G01139,VITVI03G00164,VITVI03G00222,VITVI03G00239,VITVI03G00265,VITVI03G00511,VITVI03G00447,VITVI03G04370,VITVI04G00141,VITVI04G00150,VITVI04…
GO:MF	NADH dehydrogenase (ubiquinone) activity	GO:0008137	1.58574e-07	6.79977	23	373	7	35134	VITVI09G02081,VITVI09G02087,VITVI00G00610,VITVI09G02052,VITVI09G02058,VITVI10G04002,VITVI00G04419
GO:MF	nucleic acid binding	GO:0003676	1.66001e-06	5.77989	5249	373	96	35134	VITVI07G01253,VITVI09G02103,VITVI00G00615,VITVI01G00183,VITVI01G01722,VITVI02G00627,VITVI02G00008,VITVI02G00018,VITVI02G00992,VITVI03G01408,VITVI03G00189,VITVI03G00265,VITVI03G00515,VITVI03G00511,VITVI03G00454,VITVI04G00141,VITVI04G00291,VITVI04G01231,VITVI04G01745,VITVI05G01830,VITVI05G00277,VITVI05G01864,VITVI05G00455,VITVI05G00513,VITVI05G00518,VITVI05G00538,VITVI05G01113,VITVI05G01117,VITVI05…
GO:MF	NADH dehydrogenase (quinone) activity	GO:0050136	1.67107e-06	5.77701	32	373	7	35134	VITVI09G02081,VITVI09G02087,VITVI00G00610,VITVI09G02052,VITVI09G02058,VITVI10G04002,VITVI00G04419
GO:MF	NAD(P)H dehydrogenase (quinone) activity	GO:0003955	3.68845e-06	5.43316	36	373	7	35134	VITVI09G02081,VITVI09G02087,VITVI00G00610,VITVI09G02052,VITVI09G02058,VITVI10G04002,VITVI00G04419
GO:MF	oxidoreductase activity, acting on NAD(P)H, quinone or similar compound as acceptor	GO:0016655	1.04794e-05	4.97966	42	373	7	35134	VITVI09G02081,VITVI09G02087,VITVI00G00610,VITVI09G02052,VITVI09G02058,VITVI10G04002,VITVI00G04419
GO:MF	NADH dehydrogenase activity	GO:0003954	1.15766e-05	4.93642	43	373	7	35134	VITVI09G02081,VITVI09G02087,VITVI00G00610,VITVI09G02052,VITVI09G02058,VITVI10G04002,VITVI00G04419
GO:MF	primary active transmembrane transporter activity	GO:0015399	2.40366e-05	4.61913	377	373	17	35134	VITVI09G02081,VITVI09G02087,VITVI00G00610,VITVI00G04351,VITVI09G02052,VITVI09G02058,VITVI10G04559,VITVI03G04370,VITVI04G00423,VITVI08G01013,VITVI09G00006,VITVI09G01320,VITVI09G01381,VITVI10G04002,VITVI12G00211,VITVI00G04419,VITVI19G04613
GO:MF	small molecule binding	GO:0036094	4.19066e-05	4.37772	4904	373	86	35134	VITVI09G02081,VITVI00G04361,VITVI10G04559,VITVI00G04871,VITVI01G01546,VITVI01G01578,VITVI01G00183,VITVI01G00272,VITVI02G00627,VITVI02G01492,VITVI02G00097,VITVI02G00137,VITVI02G00992,VITVI02G01139,VITVI03G00164,VITVI03G00222,VITVI03G00239,VITVI03G00265,VITVI03G00447,VITVI04G00423,VITVI04G02210,VITVI05G04047,VITVI05G00277,VITVI05G00294,VITVI05G01864,VITVI05G01494,VITVI06G00107,VITVI06G00139,VITVI06…
GO:MF	purine nucleotide binding	GO:0017076	4.19066e-05	4.37772	4380	373	79	35134	VITVI09G02081,VITVI10G04559,VITVI00G04871,VITVI01G01546,VITVI01G01578,VITVI01G00183,VITVI01G00272,VITVI02G00627,VITVI02G01492,VITVI02G00097,VITVI02G00137,VITVI02G00992,VITVI02G01139,VITVI03G00222,VITVI03G00239,VITVI03G00265,VITVI03G00447,VITVI04G00423,VITVI05G04047,VITVI05G00277,VITVI05G00294,VITVI05G01864,VITVI05G01494,VITVI06G00107,VITVI06G00139,VITVI06G04107,VITVI06G00692,VITVI06G01430,VITVI07…
GO:MF	nucleotide binding	GO:0000166	4.88824e-05	4.31085	4636	373	82	35134	VITVI09G02081,VITVI00G04361,VITVI10G04559,VITVI00G04871,VITVI01G01546,VITVI01G01578,VITVI01G00183,VITVI01G00272,VITVI02G00627,VITVI02G01492,VITVI02G00097,VITVI02G00137,VITVI02G00992,VITVI02G01139,VITVI03G00164,VITVI03G00222,VITVI03G00239,VITVI03G00265,VITVI03G00447,VITVI04G00423,VITVI04G02210,VITVI05G04047,VITVI05G00277,VITVI05G00294,VITVI05G01864,VITVI05G01494,VITVI06G00107,VITVI06G00139,VITVI06…
GO:MF	nucleoside phosphate binding	GO:1901265	4.88824e-05	4.31085	4636	373	82	35134	VITVI09G02081,VITVI00G04361,VITVI10G04559,VITVI00G04871,VITVI01G01546,VITVI01G01578,VITVI01G00183,VITVI01G00272,VITVI02G00627,VITVI02G01492,VITVI02G00097,VITVI02G00137,VITVI02G00992,VITVI02G01139,VITVI03G00164,VITVI03G00222,VITVI03G00239,VITVI03G00265,VITVI03G00447,VITVI04G00423,VITVI04G02210,VITVI05G04047,VITVI05G00277,VITVI05G00294,VITVI05G01864,VITVI05G01494,VITVI06G00107,VITVI06G00139,VITVI06…
GO:MF	zinc ion binding	GO:0008270	8.23884e-05	4.08413	1108	373	30	35134	VITVI10G00219,VITVI01G00183,VITVI02G00627,VITVI03G00511,VITVI04G00150,VITVI05G00513,VITVI05G00518,VITVI05G00538,VITVI05G01113,VITVI05G02077,VITVI06G00011,VITVI06G00315,VITVI06G01700,VITVI06G04438,VITVI07G00331,VITVI07G00530,VITVI07G00675,VITVI08G01591,VITVI08G01815,VITVI08G01054,VITVI08G01113,VITVI09G00365,VITVI10G00848,VITVI10G00471,VITVI12G00181,VITVI12G01964,VITVI14G01487,VITVI15G00647,VITVI15…
GO:MF	ligase activity	GO:0016874	8.54106e-05	4.06849	335	373	15	35134	VITVI01G02307,VITVI10G04559,VITVI01G01561,VITVI01G00183,VITVI06G00315,VITVI06G00392,VITVI06G00692,VITVI08G01693,VITVI10G00571,VITVI11G00224,VITVI11G01257,VITVI15G00554,VITVI16G01087,VITVI19G00369,VITVI19G04613
GO:MF	structural constituent of ribosome	GO:0003735	0.000118434	3.92652	390	373	16	35134	VITVI00G00615,VITVI01G02258,VITVI03G01408,VITVI05G00455,VITVI05G01632,VITVI07G04673,VITVI08G01462,VITVI08G00757,VITVI09G00136,VITVI10G01963,VITVI13G00568,VITVI13G01774,VITVI13G00905,VITVI15G00719,VITVI17G00305,VITVI19G00375
GO:MF	anion binding	GO:0043168	0.000122956	3.91025	4775	373	82	35134	VITVI00G04361,VITVI10G04559,VITVI00G04871,VITVI01G01546,VITVI01G01578,VITVI01G00183,VITVI01G00272,VITVI02G00627,VITVI02G01492,VITVI02G00097,VITVI02G00137,VITVI02G00992,VITVI02G01139,VITVI03G00164,VITVI03G00222,VITVI03G00239,VITVI03G00265,VITVI03G00447,VITVI04G00423,VITVI04G02210,VITVI05G04047,VITVI05G00277,VITVI05G00294,VITVI05G01864,VITVI05G01494,VITVI06G00107,VITVI06G00139,VITVI06G04107,VITVI06…
GO:MF	active transmembrane transporter activity	GO:0022804	0.000122956	3.91025	638	373	21	35134	VITVI09G02081,VITVI09G02087,VITVI00G00610,VITVI00G04351,VITVI09G02052,VITVI09G02058,VITVI10G04559,VITVI03G04370,VITVI04G00423,VITVI08G01013,VITVI09G00006,VITVI09G00500,VITVI09G01320,VITVI09G01381,VITVI10G04002,VITVI11G00505,VITVI12G00211,VITVI00G04419,VITVI14G00346,VITVI17G00833,VITVI19G04613
GO:MF	purine ribonucleoside triphosphate binding	GO:0035639	0.000132062	3.87922	3364	373	63	35134	VITVI10G04559,VITVI01G01546,VITVI01G01578,VITVI01G00183,VITVI01G00272,VITVI02G00627,VITVI02G01492,VITVI02G00097,VITVI02G00137,VITVI02G00992,VITVI02G01139,VITVI03G00222,VITVI03G00239,VITVI03G00265,VITVI03G00447,VITVI04G00423,VITVI05G04047,VITVI05G00277,VITVI05G00294,VITVI05G01864,VITVI05G01494,VITVI06G00107,VITVI06G00139,VITVI06G04107,VITVI06G00692,VITVI06G01430,VITVI07G00368,VITVI07G01821,VITVI07…
GO:MF	adenyl nucleotide binding	GO:0030554	0.000168133	3.77435	4066	373	72	35134	VITVI09G02081,VITVI10G04559,VITVI00G04871,VITVI01G01546,VITVI01G01578,VITVI01G00183,VITVI01G00272,VITVI02G00627,VITVI02G00097,VITVI02G00137,VITVI02G00992,VITVI02G01139,VITVI03G00222,VITVI03G00239,VITVI03G00265,VITVI03G00447,VITVI04G00423,VITVI05G00277,VITVI05G01864,VITVI05G01494,VITVI06G00139,VITVI06G00692,VITVI06G01430,VITVI07G00368,VITVI07G01821,VITVI07G00210,VITVI08G01180,VITVI08G01538,VITVI08…
GO:MF	purine ribonucleotide binding	GO:0032555	0.000168133	3.77435	4215	373	74	35134	VITVI10G04559,VITVI00G04871,VITVI01G01546,VITVI01G01578,VITVI01G00183,VITVI01G00272,VITVI02G00627,VITVI02G01492,VITVI02G00097,VITVI02G00137,VITVI02G00992,VITVI02G01139,VITVI03G00222,VITVI03G00239,VITVI03G00265,VITVI03G00447,VITVI04G00423,VITVI05G04047,VITVI05G00277,VITVI05G00294,VITVI05G01864,VITVI05G01494,VITVI06G00107,VITVI06G00139,VITVI06G04107,VITVI06G00692,VITVI06G01430,VITVI07G00368,VITVI07…
GO:MF	carbohydrate derivative binding	GO:0097367	0.000182324	3.73916	4307	373	75	35134	VITVI10G04559,VITVI00G04871,VITVI01G01546,VITVI01G01578,VITVI01G00183,VITVI01G00272,VITVI02G00627,VITVI02G01492,VITVI02G00097,VITVI02G00137,VITVI02G00992,VITVI02G01139,VITVI03G00222,VITVI03G00239,VITVI03G00265,VITVI03G00447,VITVI04G00423,VITVI05G04047,VITVI05G00277,VITVI05G00294,VITVI05G01864,VITVI05G01494,VITVI06G00107,VITVI06G00139,VITVI06G04107,VITVI06G00692,VITVI06G01430,VITVI07G00368,VITVI07…
GO:MF	ribonucleotide binding	GO:0032553	0.000221363	3.6549	4259	373	74	35134	VITVI10G04559,VITVI00G04871,VITVI01G01546,VITVI01G01578,VITVI01G00183,VITVI01G00272,VITVI02G00627,VITVI02G01492,VITVI02G00097,VITVI02G00137,VITVI02G00992,VITVI02G01139,VITVI03G00222,VITVI03G00239,VITVI03G00265,VITVI03G00447,VITVI04G00423,VITVI05G04047,VITVI05G00277,VITVI05G00294,VITVI05G01864,VITVI05G01494,VITVI06G00107,VITVI06G00139,VITVI06G04107,VITVI06G00692,VITVI06G01430,VITVI07G00368,VITVI07…
GO:MF	metal ion binding	GO:0046872	0.000228297	3.6415	3964	373	70	35134	VITVI07G00077,VITVI10G00219,VITVI09G02103,VITVI00G04318,VITVI00G04351,VITVI00G04871,VITVI01G01650,VITVI01G00183,VITVI02G00627,VITVI03G00511,VITVI03G04370,VITVI04G00141,VITVI04G00150,VITVI04G00433,VITVI04G01238,VITVI05G00277,VITVI05G00294,VITVI05G00513,VITVI05G00518,VITVI05G00538,VITVI05G01113,VITVI05G01137,VITVI05G02077,VITVI06G00011,VITVI06G00315,VITVI06G01700,VITVI06G00729,VITVI06G04438,VITVI07…
GO:MF	quinone binding	GO:0048038	0.000244865	3.61107	30	373	5	35134	VITVI09G02081,VITVI09G02052,VITVI09G02058,VITVI10G04002,VITVI17G00898
GO:MF	cation binding	GO:0043169	0.000259313	3.58618	3990	373	70	35134	VITVI07G00077,VITVI10G00219,VITVI09G02103,VITVI00G04318,VITVI00G04351,VITVI00G04871,VITVI01G01650,VITVI01G00183,VITVI02G00627,VITVI03G00511,VITVI03G04370,VITVI04G00141,VITVI04G00150,VITVI04G00433,VITVI04G01238,VITVI05G00277,VITVI05G00294,VITVI05G00513,VITVI05G00518,VITVI05G00538,VITVI05G01113,VITVI05G01137,VITVI05G02077,VITVI06G00011,VITVI06G00315,VITVI06G01700,VITVI06G00729,VITVI06G04438,VITVI07…
GO:MF	catalytic activity	GO:0003824	0.000259313	3.58618	11701	373	163	35134	VITVI09G02081,VITVI09G02087,VITVI09G02103,VITVI01G02307,VITVI00G04318,VITVI00G00610,VITVI00G04351,VITVI00G04361,VITVI09G02052,VITVI09G02058,VITVI10G04559,VITVI00G04871,VITVI01G01546,VITVI01G01561,VITVI01G01578,VITVI01G00183,VITVI01G00272,VITVI01G00556,VITVI01G01822,VITVI02G00627,VITVI02G01492,VITVI02G00097,VITVI02G00137,VITVI02G00992,VITVI02G01139,VITVI03G00164,VITVI03G00222,VITVI03G00239,VITVI03…
GO:MF	rRNA binding	GO:0019843	0.000311648	3.50634	108	373	8	35134	VITVI00G00615,VITVI03G01408,VITVI05G01632,VITVI06G00107,VITVI08G00757,VITVI09G00136,VITVI13G00568,VITVI15G00719
GO:MF	oxidoreductase activity, acting on a heme group of donors	GO:0016675	0.000326452	3.48618	6	373	3	35134	VITVI00G04351,VITVI03G04370,VITVI12G00211
GO:MF	cytochrome-c oxidase activity	GO:0004129	0.000326452	3.48618	6	373	3	35134	VITVI00G04351,VITVI03G04370,VITVI12G00211
GO:MF	oxidoreductase activity, acting on NAD(P)H	GO:0016651	0.000349019	3.45715	81	373	7	35134	VITVI09G02081,VITVI09G02087,VITVI00G00610,VITVI09G02052,VITVI09G02058,VITVI10G04002,VITVI00G04419
GO:MF	chlorophyll binding	GO:0016168	0.000378867	3.42151	34	373	5	35134	VITVI00G04318,VITVI00G04871,VITVI13G00384,VITVI18G00619,VITVI18G00661
GO:MF	ATP binding	GO:0005524	0.000529373	3.27624	3051	373	56	35134	VITVI10G04559,VITVI01G01546,VITVI01G01578,VITVI01G00183,VITVI01G00272,VITVI02G00627,VITVI02G00097,VITVI02G00137,VITVI02G00992,VITVI02G01139,VITVI03G00222,VITVI03G00239,VITVI03G00265,VITVI03G00447,VITVI04G00423,VITVI05G00277,VITVI05G01864,VITVI05G01494,VITVI06G00139,VITVI06G00692,VITVI06G01430,VITVI07G00368,VITVI07G01821,VITVI07G00210,VITVI08G01180,VITVI08G01538,VITVI08G01539,VITVI08G01693,VITVI08…
GO:MF	adenyl ribonucleotide binding	GO:0032559	0.000656339	3.18287	3902	373	67	35134	VITVI10G04559,VITVI00G04871,VITVI01G01546,VITVI01G01578,VITVI01G00183,VITVI01G00272,VITVI02G00627,VITVI02G00097,VITVI02G00137,VITVI02G00992,VITVI02G01139,VITVI03G00222,VITVI03G00239,VITVI03G00265,VITVI03G00447,VITVI04G00423,VITVI05G00277,VITVI05G01864,VITVI05G01494,VITVI06G00139,VITVI06G00692,VITVI06G01430,VITVI07G00368,VITVI07G01821,VITVI07G00210,VITVI08G01180,VITVI08G01538,VITVI08G01539,VITVI08…
GO:MF	proton transmembrane transporter activity	GO:0015078	0.000822103	3.08507	163	373	9	35134	VITVI01G02307,VITVI00G04351,VITVI10G04559,VITVI03G04370,VITVI09G00006,VITVI09G01381,VITVI12G00211,VITVI14G00346,VITVI19G04613
GO:MF	transition metal ion binding	GO:0046914	0.00093297	3.03013	1840	373	38	35134	VITVI10G00219,VITVI00G04318,VITVI00G04351,VITVI01G00183,VITVI02G00627,VITVI03G00511,VITVI04G00150,VITVI05G00513,VITVI05G00518,VITVI05G00538,VITVI05G01113,VITVI05G02077,VITVI06G00011,VITVI06G00315,VITVI06G01700,VITVI06G00729,VITVI06G04438,VITVI07G00331,VITVI07G00530,VITVI07G00675,VITVI08G01591,VITVI08G01815,VITVI08G01054,VITVI08G01113,VITVI09G00365,VITVI10G00848,VITVI10G00471,VITVI12G00181,VITVI12…
GO:MF	electron transporter, transferring electrons within the cyclic electron transport pathway of photosynthesis activity	GO:0045156	0.00371423	2.43013	13	373	3	35134	VITVI00G04318,VITVI00G04871,VITVI13G00384
GO:MF	structural molecule activity	GO:0005198	0.00421517	2.37519	559	373	16	35134	VITVI00G00615,VITVI01G02258,VITVI03G01408,VITVI05G00455,VITVI05G01632,VITVI07G04673,VITVI08G01462,VITVI08G00757,VITVI09G00136,VITVI10G01963,VITVI13G00568,VITVI13G01774,VITVI13G00905,VITVI15G00719,VITVI17G00305,VITVI19G00375
GO:MF	mRNA binding	GO:0003729	0.00481312	2.31757	511	373	15	35134	VITVI07G01253,VITVI09G02103,VITVI03G01408,VITVI03G00189,VITVI03G00515,VITVI04G00141,VITVI05G01830,VITVI06G00107,VITVI07G01109,VITVI08G01927,VITVI08G01113,VITVI14G02025,VITVI15G00513,VITVI17G00986,VITVI19G00674
GO:MF	NAD binding	GO:0051287	0.00565203	2.2478	94	373	6	35134	VITVI09G02081,VITVI03G00447,VITVI10G04002,VITVI15G00452,VITVI15G01188,VITVI17G00154
GO:MF	inorganic cation transmembrane transporter activity	GO:0022890	0.00565203	2.2478	412	373	13	35134	VITVI01G02307,VITVI00G04351,VITVI10G04559,VITVI03G04370,VITVI06G00262,VITVI09G00006,VITVI09G01320,VITVI09G01381,VITVI12G00211,VITVI14G00346,VITVI14G01835,VITVI14G02018,VITVI19G04613
GO:MF	ATP-dependent activity	GO:0140657	0.00693679	2.15884	1087	373	24	35134	VITVI10G04559,VITVI02G00627,VITVI02G00992,VITVI03G00265,VITVI03G00447,VITVI04G00423,VITVI05G00277,VITVI05G01864,VITVI06G00692,VITVI07G00368,VITVI08G01002,VITVI08G01013,VITVI08G00869,VITVI09G00006,VITVI09G04100,VITVI09G01320,VITVI10G00571,VITVI10G00948,VITVI14G01835,VITVI15G00993,VITVI16G00869,VITVI18G00411,VITVI18G00619,VITVI19G04613
GO:MF	oxygen evolving activity	GO:0010242	0.00693679	2.15884	4	373	2	35134	VITVI00G04318,VITVI13G00384
GO:MF	ligase activity, forming carbon-sulfur bonds	GO:0016877	0.00862989	2.06399	40	373	4	35134	VITVI01G01561,VITVI06G00692,VITVI10G00571,VITVI11G01257
GO:MF	monoatomic cation transmembrane transporter activity	GO:0008324	0.0087823	2.05639	436	373	13	35134	VITVI01G02307,VITVI00G04351,VITVI10G04559,VITVI03G04370,VITVI06G00262,VITVI09G00006,VITVI09G01320,VITVI09G01381,VITVI12G00211,VITVI14G00346,VITVI14G01835,VITVI14G02018,VITVI19G04613
GO:MF	active monoatomic ion transmembrane transporter activity	GO:0022853	0.00904678	2.04351	187	373	8	35134	VITVI00G04351,VITVI10G04559,VITVI03G04370,VITVI09G00006,VITVI09G01320,VITVI09G01381,VITVI12G00211,VITVI14G00346
GO:MF	histone binding	GO:0042393	0.00929005	2.03198	71	373	5	35134	VITVI03G00355,VITVI04G00141,VITVI05G01864,VITVI07G01538,VITVI19G00757
GO:MF	monoatomic cation channel activity	GO:0005261	0.0123965	1.9067	76	373	5	35134	VITVI01G02307,VITVI10G04559,VITVI06G00262,VITVI14G02018,VITVI19G04613
GO:MF	inorganic molecular entity transmembrane transporter activity	GO:0015318	0.013344	1.87471	518	373	14	35134	VITVI01G02307,VITVI00G04351,VITVI10G04559,VITVI03G04370,VITVI06G00262,VITVI09G00006,VITVI09G00500,VITVI09G01320,VITVI09G01381,VITVI12G00211,VITVI14G00346,VITVI14G01835,VITVI14G02018,VITVI19G04613
GO:MF	RNA helicase activity	GO:0003724	0.0156157	1.80644	81	373	5	35134	VITVI02G00627,VITVI03G00265,VITVI05G00277,VITVI15G00993,VITVI16G00869
GO:MF	ATP-dependent activity, acting on RNA	GO:0008186	0.0156157	1.80644	81	373	5	35134	VITVI02G00627,VITVI03G00265,VITVI05G00277,VITVI15G00993,VITVI16G00869
GO:MF	malate dehydrogenase activity	GO:0016615	0.0179773	1.74528	24	373	3	35134	VITVI10G00554,VITVI15G00452,VITVI15G01188
GO:MF	oxidoreductase activity	GO:0016491	0.0183285	1.73687	2191	373	38	35134	VITVI09G02081,VITVI09G02087,VITVI09G02103,VITVI00G04318,VITVI00G00610,VITVI00G04351,VITVI00G04361,VITVI09G02052,VITVI09G02058,VITVI00G04871,VITVI01G00556,VITVI03G00164,VITVI03G00447,VITVI03G04370,VITVI04G00433,VITVI04G02210,VITVI04G01557,VITVI06G00210,VITVI06G00729,VITVI08G00008,VITVI10G00554,VITVI10G00796,VITVI10G04002,VITVI11G01184,VITVI12G00211,VITVI13G00384,VITVI00G04419,VITVI14G00112,VITVI15…
GO:MF	ribulose-bisphosphate carboxylase activity	GO:0016984	0.0194635	1.71078	7	373	2	35134	VITVI07G01982,VITVI16G00291
GO:MF	transporter activity	GO:0005215	0.0267605	1.57251	1579	373	29	35134	VITVI09G02081,VITVI09G02087,VITVI09G02088,VITVI01G02307,VITVI00G00610,VITVI00G04351,VITVI09G02052,VITVI09G02058,VITVI10G04559,VITVI03G04370,VITVI04G00423,VITVI06G00262,VITVI08G01013,VITVI08G00869,VITVI09G00006,VITVI09G00500,VITVI09G01320,VITVI09G01381,VITVI10G04002,VITVI11G00505,VITVI12G00211,VITVI00G04419,VITVI14G00346,VITVI14G01835,VITVI14G01307,VITVI14G02018,VITVI17G00833,VITVI18G00392,VITVI19…
GO:MF	proton-transporting ATP synthase activity, rotational mechanism	GO:0046933	0.0318638	1.4967	30	373	3	35134	VITVI01G02307,VITVI10G04559,VITVI19G04613
GO:MF	transmembrane transporter activity	GO:0022857	0.0318638	1.4967	1530	373	28	35134	VITVI09G02081,VITVI09G02087,VITVI09G02088,VITVI01G02307,VITVI00G00610,VITVI00G04351,VITVI09G02052,VITVI09G02058,VITVI10G04559,VITVI03G04370,VITVI04G00423,VITVI06G00262,VITVI08G01013,VITVI09G00006,VITVI09G00500,VITVI09G01320,VITVI09G01381,VITVI10G04002,VITVI11G00505,VITVI12G00211,VITVI00G04419,VITVI14G00346,VITVI14G01835,VITVI14G01307,VITVI14G02018,VITVI17G00833,VITVI18G00392,VITVI19G04613
GO:MF	proton channel activity	GO:0015252	0.0332823	1.47779	31	373	3	35134	VITVI01G02307,VITVI10G04559,VITVI19G04613
GO:MF	aminopeptidase activity	GO:0004177	0.0332823	1.47779	31	373	3	35134	VITVI04G01238,VITVI10G01553,VITVI16G01897
GO:MF	phosphotransferase activity, phosphate group as acceptor	GO:0016776	0.0332823	1.47779	31	373	3	35134	VITVI02G00137,VITVI06G00692,VITVI08G01538
GO:MF	modification-dependent protein binding	GO:0140030	0.0359035	1.44486	32	373	3	35134	VITVI04G00555,VITVI08G01002,VITVI19G00757
GO:MF	nucleoside diphosphate kinase activity	GO:0004550	0.0361026	1.44246	10	373	2	35134	VITVI02G00137,VITVI06G00692
GO:MF	nucleocytoplasmic carrier activity	GO:0140142	0.038067	1.41945	33	373	3	35134	VITVI08G00892,VITVI14G00122,VITVI15G01571
GO:MF	monoatomic ion transmembrane transporter activity	GO:0015075	0.0399414	1.39858	539	373	13	35134	VITVI01G02307,VITVI00G04351,VITVI10G04559,VITVI03G04370,VITVI06G00262,VITVI09G00006,VITVI09G01320,VITVI09G01381,VITVI12G00211,VITVI14G00346,VITVI14G01835,VITVI14G02018,VITVI19G04613
GO:MF	amino acid binding	GO:0016597	0.0402756	1.39496	34	373	3	35134	VITVI01G00183,VITVI06G00432,VITVI08G01614
GO:MF	catalytic activity, acting on a protein	GO:0140096	0.0432105	1.36441	3362	373	51	35134	VITVI01G01546,VITVI01G01578,VITVI01G00272,VITVI02G00097,VITVI02G01139,VITVI03G00222,VITVI03G00239,VITVI04G01238,VITVI04G01024,VITVI05G00277,VITVI05G01494,VITVI06G00139,VITVI06G00315,VITVI06G00392,VITVI06G00644,VITVI06G00692,VITVI06G01242,VITVI06G01430,VITVI07G00368,VITVI07G01821,VITVI07G00210,VITVI08G01180,VITVI08G00200,VITVI08G01054,VITVI09G00096,VITVI09G00136,VITVI09G00151,VITVI09G01262,VITVI10…
GO:MF	kinase activity	GO:0016301	0.0432105	1.36441	2184	373	36	35134	VITVI01G01546,VITVI01G01578,VITVI01G00272,VITVI02G00097,VITVI02G00137,VITVI02G01139,VITVI03G00222,VITVI03G00239,VITVI05G01494,VITVI05G01516,VITVI06G00139,VITVI06G00692,VITVI06G01430,VITVI07G01821,VITVI07G00210,VITVI08G01538,VITVI08G01539,VITVI09G00136,VITVI10G00946,VITVI12G00075,VITVI12G00181,VITVI12G02179,VITVI13G00384,VITVI13G00537,VITVI13G00052,VITVI13G01805,VITVI14G04425,VITVI14G01756,VITVI15…
GO:MF	ubiquitin-like modifier activating enzyme activity	GO:0008641	0.048036	1.31843	12	373	2	35134	VITVI06G00692,VITVI10G00571
GO:BP	cellular process	GO:0009987	2.6285e-14	13.5803	14813	373	238	35134	VITVI07G00077,VITVI09G02081,VITVI09G02087,VITVI09G02088,VITVI00G04219,VITVI09G02103,VITVI00G04224,VITVI01G02307,VITVI00G04318,VITVI00G00610,VITVI00G00615,VITVI00G04351,VITVI09G02052,VITVI09G02058,VITVI10G04559,VITVI00G04871,VITVI01G01546,VITVI01G01578,VITVI01G02258,VITVI01G00071,VITVI01G00183,VITVI01G00272,VITVI01G01722,VITVI01G01822,VITVI02G00627,VITVI02G01492,VITVI02G00008,VITVI02G00018,VITVI02…
GO:BP	biological_process	GO:0008150	9.22301e-13	12.0351	18606	373	272	35134	VITVI07G00077,VITVI09G02081,VITVI09G02087,VITVI09G02088,VITVI00G04219,VITVI09G02103,VITVI00G04224,VITVI01G02307,VITVI00G04318,VITVI00G00610,VITVI00G00615,VITVI00G04351,VITVI00G04361,VITVI09G02052,VITVI09G02058,VITVI10G04559,VITVI00G04871,VITVI01G01546,VITVI01G01578,VITVI01G02258,VITVI01G00071,VITVI01G00183,VITVI01G00272,VITVI01G01722,VITVI01G01822,VITVI02G00627,VITVI02G01492,VITVI02G00008,VITVI02…
GO:BP	metabolic process	GO:0008152	3.42192e-12	11.4657	13524	373	217	35134	VITVI07G00077,VITVI09G02081,VITVI09G02087,VITVI09G02103,VITVI00G04224,VITVI01G02307,VITVI00G04318,VITVI00G00610,VITVI00G04351,VITVI00G04361,VITVI09G02052,VITVI09G02058,VITVI10G04559,VITVI00G04871,VITVI01G01546,VITVI01G01578,VITVI01G02258,VITVI01G00071,VITVI01G00183,VITVI01G00272,VITVI01G01722,VITVI01G01822,VITVI02G00627,VITVI02G00014,VITVI02G00018,VITVI02G00097,VITVI02G00137,VITVI02G00146,VITVI02…
GO:BP	cellular metabolic process	GO:0044237	6.86725e-12	11.1632	10831	373	185	35134	VITVI07G00077,VITVI09G02081,VITVI09G02087,VITVI09G02103,VITVI00G04224,VITVI01G02307,VITVI00G04318,VITVI00G00610,VITVI00G04351,VITVI09G02052,VITVI09G02058,VITVI10G04559,VITVI00G04871,VITVI01G01546,VITVI01G01578,VITVI01G02258,VITVI01G00071,VITVI01G00183,VITVI01G00272,VITVI01G01722,VITVI01G01822,VITVI02G00627,VITVI02G00018,VITVI02G00097,VITVI02G00137,VITVI02G00992,VITVI02G01139,VITVI03G01408,VITVI03…
GO:BP	generation of precursor metabolites and energy	GO:0006091	1.52535e-10	9.81663	416	373	26	35134	VITVI09G02081,VITVI09G02087,VITVI09G02103,VITVI00G04224,VITVI01G02307,VITVI00G04318,VITVI00G00610,VITVI00G04351,VITVI09G02052,VITVI09G02058,VITVI00G04871,VITVI03G04370,VITVI04G01557,VITVI05G00538,VITVI08G01506,VITVI08G01539,VITVI10G00554,VITVI10G04002,VITVI10G00073,VITVI12G00211,VITVI13G00384,VITVI00G04419,VITVI18G00504,VITVI18G00619,VITVI18G00661,VITVI19G00690
GO:BP	electron transport chain	GO:0022900	6.71847e-10	9.17273	193	373	18	35134	VITVI09G02081,VITVI09G02087,VITVI09G02103,VITVI00G04224,VITVI00G04318,VITVI00G00610,VITVI00G04351,VITVI09G02052,VITVI09G02058,VITVI00G04871,VITVI03G04370,VITVI10G04002,VITVI12G00211,VITVI13G00384,VITVI00G04419,VITVI18G00619,VITVI18G00661,VITVI19G00690
GO:BP	aerobic respiration	GO:0009060	4.62562e-09	8.33483	116	373	14	35134	VITVI09G02081,VITVI09G02087,VITVI00G04224,VITVI01G02307,VITVI00G00610,VITVI00G04351,VITVI09G02052,VITVI09G02058,VITVI03G04370,VITVI04G01557,VITVI10G00554,VITVI10G04002,VITVI10G00073,VITVI12G00211
GO:BP	nitrogen compound metabolic process	GO:0006807	5.61088e-09	8.25097	10133	373	167	35134	VITVI07G00077,VITVI01G02307,VITVI10G04559,VITVI01G01546,VITVI01G01578,VITVI01G02258,VITVI01G00071,VITVI01G00183,VITVI01G00272,VITVI01G01722,VITVI01G01822,VITVI02G00627,VITVI02G00014,VITVI02G00018,VITVI02G00097,VITVI02G00137,VITVI02G00992,VITVI02G01139,VITVI03G01408,VITVI03G00222,VITVI03G00239,VITVI03G00265,VITVI03G00511,VITVI03G00454,VITVI03G00447,VITVI03G00335,VITVI04G00141,VITVI04G00291,VITVI04…
GO:BP	primary metabolic process	GO:0044238	7.99457e-09	8.0972	11731	373	185	35134	VITVI07G00077,VITVI00G04224,VITVI01G02307,VITVI00G04361,VITVI10G04559,VITVI01G01546,VITVI01G01578,VITVI01G02258,VITVI01G00071,VITVI01G00183,VITVI01G00272,VITVI01G01722,VITVI01G01822,VITVI02G00627,VITVI02G00014,VITVI02G00018,VITVI02G00097,VITVI02G00137,VITVI02G00146,VITVI02G00992,VITVI02G01139,VITVI03G01408,VITVI03G00222,VITVI03G00239,VITVI03G00265,VITVI03G00511,VITVI03G00454,VITVI03G00447,VITVI03…
GO:BP	cellular respiration	GO:0045333	1.2401e-08	7.90654	128	373	14	35134	VITVI09G02081,VITVI09G02087,VITVI00G04224,VITVI01G02307,VITVI00G00610,VITVI00G04351,VITVI09G02052,VITVI09G02058,VITVI03G04370,VITVI04G01557,VITVI10G00554,VITVI10G04002,VITVI10G00073,VITVI12G00211
GO:BP	organic substance metabolic process	GO:0071704	3.13274e-08	7.50408	12549	373	192	35134	VITVI07G00077,VITVI01G02307,VITVI00G04361,VITVI10G04559,VITVI01G01546,VITVI01G01578,VITVI01G02258,VITVI01G00071,VITVI01G00183,VITVI01G00272,VITVI01G01722,VITVI01G01822,VITVI02G00627,VITVI02G00014,VITVI02G00018,VITVI02G00097,VITVI02G00137,VITVI02G00146,VITVI02G00992,VITVI02G01139,VITVI03G01408,VITVI03G00222,VITVI03G00239,VITVI03G00265,VITVI03G00515,VITVI03G00511,VITVI03G00454,VITVI03G00447,VITVI03…
GO:BP	organonitrogen compound metabolic process	GO:1901564	4.27731e-08	7.36883	5778	373	109	35134	VITVI01G02307,VITVI10G04559,VITVI01G01546,VITVI01G01578,VITVI01G02258,VITVI01G00071,VITVI01G00183,VITVI01G00272,VITVI01G01822,VITVI02G00014,VITVI02G00097,VITVI02G00137,VITVI02G01139,VITVI03G01408,VITVI03G00222,VITVI03G00239,VITVI03G00447,VITVI03G00335,VITVI04G00555,VITVI04G01231,VITVI04G01492,VITVI04G01024,VITVI05G01830,VITVI05G00455,VITVI05G00538,VITVI05G01632,VITVI05G01494,VITVI06G00022,VITVI06…
GO:BP	energy derivation by oxidation of organic compounds	GO:0015980	5.08052e-08	7.29409	145	373	14	35134	VITVI09G02081,VITVI09G02087,VITVI00G04224,VITVI01G02307,VITVI00G00610,VITVI00G04351,VITVI09G02052,VITVI09G02058,VITVI03G04370,VITVI04G01557,VITVI10G00554,VITVI10G04002,VITVI10G00073,VITVI12G00211
GO:BP	macromolecule metabolic process	GO:0043170	1.24114e-07	6.90618	9741	373	157	35134	VITVI07G00077,VITVI01G01546,VITVI01G01578,VITVI01G02258,VITVI01G00071,VITVI01G00183,VITVI01G00272,VITVI01G01722,VITVI01G01822,VITVI02G00627,VITVI02G00014,VITVI02G00018,VITVI02G00097,VITVI02G00992,VITVI02G01139,VITVI03G01408,VITVI03G00222,VITVI03G00239,VITVI03G00265,VITVI03G00515,VITVI03G00511,VITVI03G00454,VITVI03G00335,VITVI04G00141,VITVI04G00291,VITVI04G00555,VITVI04G01231,VITVI04G01024,VITVI04…
GO:BP	organonitrogen compound biosynthetic process	GO:1901566	1.26444e-07	6.8981	1565	373	45	35134	VITVI01G02307,VITVI10G04559,VITVI01G02258,VITVI01G00183,VITVI01G01822,VITVI02G00137,VITVI03G01408,VITVI03G00447,VITVI04G01231,VITVI04G01492,VITVI04G01024,VITVI05G01830,VITVI05G00455,VITVI05G00538,VITVI05G01632,VITVI06G00107,VITVI06G04107,VITVI06G00692,VITVI07G04673,VITVI08G01462,VITVI08G01538,VITVI08G01693,VITVI08G00114,VITVI08G00757,VITVI09G00136,VITVI09G00151,VITVI10G00571,VITVI10G01963,VITVI11…
GO:BP	oxidative phosphorylation	GO:0006119	5.57278e-07	6.25393	56	373	9	35134	VITVI09G02081,VITVI09G02087,VITVI00G04224,VITVI01G02307,VITVI00G04351,VITVI09G02052,VITVI09G02058,VITVI03G04370,VITVI12G00211
GO:BP	protein metabolic process	GO:0019538	1.56189e-06	5.80635	4830	373	91	35134	VITVI01G01546,VITVI01G01578,VITVI01G02258,VITVI01G00071,VITVI01G00183,VITVI01G00272,VITVI01G01822,VITVI02G00014,VITVI02G00097,VITVI02G01139,VITVI03G01408,VITVI03G00222,VITVI03G00239,VITVI03G00335,VITVI04G00555,VITVI04G01231,VITVI04G01024,VITVI05G01830,VITVI05G00455,VITVI05G01632,VITVI05G01494,VITVI06G00022,VITVI06G00139,VITVI06G00315,VITVI06G04107,VITVI06G00375,VITVI06G00392,VITVI06G00644,VITVI06…
GO:BP	cellular nitrogen compound metabolic process	GO:0034641	1.68766e-06	5.77271	5978	373	106	35134	VITVI07G00077,VITVI01G02307,VITVI10G04559,VITVI01G02258,VITVI01G00183,VITVI01G00272,VITVI01G01722,VITVI02G00627,VITVI02G00018,VITVI02G00137,VITVI02G00992,VITVI03G01408,VITVI03G00222,VITVI03G00265,VITVI03G00511,VITVI03G00454,VITVI04G00141,VITVI04G00291,VITVI04G01231,VITVI04G01745,VITVI05G01830,VITVI05G01864,VITVI05G00455,VITVI05G00462,VITVI05G00513,VITVI05G00518,VITVI05G00538,VITVI05G01113,VITVI05…
GO:BP	ATP synthesis coupled electron transport	GO:0042773	2.02749e-06	5.69304	47	373	8	35134	VITVI09G02081,VITVI09G02087,VITVI00G04224,VITVI00G04351,VITVI09G02052,VITVI09G02058,VITVI03G04370,VITVI12G00211
GO:BP	macromolecule modification	GO:0043412	4.38665e-06	5.35787	3642	373	73	35134	VITVI01G01546,VITVI01G01578,VITVI01G00183,VITVI01G00272,VITVI01G01822,VITVI02G00014,VITVI02G00018,VITVI02G00097,VITVI02G01139,VITVI03G00222,VITVI03G00239,VITVI03G00511,VITVI03G00335,VITVI04G00291,VITVI04G01231,VITVI04G01024,VITVI05G01830,VITVI05G00513,VITVI05G00518,VITVI05G00538,VITVI05G01113,VITVI05G01117,VITVI05G02077,VITVI05G01494,VITVI06G00011,VITVI06G00139,VITVI06G00315,VITVI06G00375,VITVI06…
GO:BP	peptide metabolic process	GO:0006518	4.38665e-06	5.35787	821	373	28	35134	VITVI01G02258,VITVI01G00183,VITVI03G01408,VITVI05G01830,VITVI05G00455,VITVI05G01632,VITVI06G04107,VITVI06G01242,VITVI07G04673,VITVI08G01462,VITVI08G01693,VITVI08G00114,VITVI08G00757,VITVI09G00136,VITVI10G01963,VITVI11G00058,VITVI11G00224,VITVI13G00568,VITVI13G00656,VITVI13G01774,VITVI15G00513,VITVI15G00554,VITVI15G00719,VITVI16G01087,VITVI17G00305,VITVI17G01266,VITVI18G01035,VITVI19G00375
GO:BP	translation	GO:0006412	5.48996e-06	5.26043	781	373	27	35134	VITVI01G02258,VITVI01G00183,VITVI03G01408,VITVI05G01830,VITVI05G00455,VITVI05G01632,VITVI06G04107,VITVI07G04673,VITVI08G01462,VITVI08G01693,VITVI08G00114,VITVI08G00757,VITVI09G00136,VITVI10G01963,VITVI11G00058,VITVI11G00224,VITVI13G00568,VITVI13G00656,VITVI13G01774,VITVI15G00513,VITVI15G00554,VITVI15G00719,VITVI16G01087,VITVI17G00305,VITVI17G01266,VITVI18G01035,VITVI19G00375
GO:BP	peptide biosynthetic process	GO:0043043	5.6681e-06	5.24656	784	373	27	35134	VITVI01G02258,VITVI01G00183,VITVI03G01408,VITVI05G01830,VITVI05G00455,VITVI05G01632,VITVI06G04107,VITVI07G04673,VITVI08G01462,VITVI08G01693,VITVI08G00114,VITVI08G00757,VITVI09G00136,VITVI10G01963,VITVI11G00058,VITVI11G00224,VITVI13G00568,VITVI13G00656,VITVI13G01774,VITVI15G00513,VITVI15G00554,VITVI15G00719,VITVI16G01087,VITVI17G00305,VITVI17G01266,VITVI18G01035,VITVI19G00375
GO:BP	amide metabolic process	GO:0043603	5.74811e-06	5.24047	942	373	30	35134	VITVI01G02258,VITVI01G00183,VITVI03G01408,VITVI05G01830,VITVI05G00455,VITVI05G01632,VITVI06G04107,VITVI06G01242,VITVI07G04673,VITVI08G01462,VITVI08G01693,VITVI08G00114,VITVI08G00757,VITVI09G00136,VITVI09G00151,VITVI10G01963,VITVI10G00073,VITVI11G00058,VITVI11G00224,VITVI13G00568,VITVI13G00656,VITVI13G01774,VITVI15G00513,VITVI15G00554,VITVI15G00719,VITVI16G01087,VITVI17G00305,VITVI17G01266,VITVI18…
GO:BP	amide biosynthetic process	GO:0043604	6.32887e-06	5.19867	843	373	28	35134	VITVI01G02258,VITVI01G00183,VITVI03G01408,VITVI05G01830,VITVI05G00455,VITVI05G01632,VITVI06G04107,VITVI07G04673,VITVI08G01462,VITVI08G01693,VITVI08G00114,VITVI08G00757,VITVI09G00136,VITVI09G00151,VITVI10G01963,VITVI11G00058,VITVI11G00224,VITVI13G00568,VITVI13G00656,VITVI13G01774,VITVI15G00513,VITVI15G00554,VITVI15G00719,VITVI16G01087,VITVI17G00305,VITVI17G01266,VITVI18G01035,VITVI19G00375
GO:BP	photosynthesis	GO:0015979	9.56658e-06	5.01924	164	373	12	35134	VITVI09G02103,VITVI00G04318,VITVI09G02052,VITVI00G04871,VITVI05G00538,VITVI10G04002,VITVI11G01528,VITVI12G02416,VITVI13G00384,VITVI16G00367,VITVI18G00619,VITVI18G00661
GO:BP	respiratory electron transport chain	GO:0022904	1.0295e-05	4.98737	60	373	8	35134	VITVI09G02081,VITVI09G02087,VITVI00G04224,VITVI00G04351,VITVI09G02052,VITVI09G02058,VITVI03G04370,VITVI12G00211
GO:BP	nucleobase-containing compound metabolic process	GO:0006139	2.68223e-05	4.5715	5272	373	92	35134	VITVI07G00077,VITVI01G02307,VITVI10G04559,VITVI01G00183,VITVI01G00272,VITVI01G01722,VITVI02G00627,VITVI02G00018,VITVI02G00137,VITVI02G00992,VITVI03G00222,VITVI03G00265,VITVI03G00511,VITVI03G00454,VITVI04G00141,VITVI04G00291,VITVI04G01231,VITVI04G01745,VITVI05G01830,VITVI05G01864,VITVI05G00455,VITVI05G00462,VITVI05G00513,VITVI05G00518,VITVI05G00538,VITVI05G01113,VITVI05G01117,VITVI05G02077,VITVI05…
GO:BP	cellular aromatic compound metabolic process	GO:0006725	7.01688e-05	4.15386	5710	373	96	35134	VITVI07G00077,VITVI01G02307,VITVI10G04559,VITVI01G00183,VITVI01G00272,VITVI01G01722,VITVI02G00627,VITVI02G00018,VITVI02G00137,VITVI02G00992,VITVI03G00222,VITVI03G00265,VITVI03G00511,VITVI03G00454,VITVI04G00141,VITVI04G00291,VITVI04G01231,VITVI04G01492,VITVI04G01745,VITVI05G01830,VITVI05G01864,VITVI05G00455,VITVI05G00462,VITVI05G00513,VITVI05G00518,VITVI05G00538,VITVI05G01113,VITVI05G01117,VITVI05…
GO:BP	organic cyclic compound metabolic process	GO:1901360	7.01688e-05	4.15386	5789	373	97	35134	VITVI07G00077,VITVI01G02307,VITVI00G04361,VITVI10G04559,VITVI01G00183,VITVI01G00272,VITVI01G01722,VITVI02G00627,VITVI02G00018,VITVI02G00137,VITVI02G00992,VITVI03G00222,VITVI03G00265,VITVI03G00511,VITVI03G00454,VITVI04G00141,VITVI04G00291,VITVI04G01231,VITVI04G01492,VITVI04G01745,VITVI05G01830,VITVI05G01864,VITVI05G00455,VITVI05G00462,VITVI05G00513,VITVI05G00518,VITVI05G00538,VITVI05G01113,VITVI05…
GO:BP	heterocycle metabolic process	GO:0046483	8.19506e-05	4.08645	5500	373	93	35134	VITVI07G00077,VITVI01G02307,VITVI10G04559,VITVI01G00183,VITVI01G00272,VITVI01G01722,VITVI02G00627,VITVI02G00018,VITVI02G00137,VITVI02G00992,VITVI03G00222,VITVI03G00265,VITVI03G00511,VITVI03G00454,VITVI04G00141,VITVI04G00291,VITVI04G01231,VITVI04G01745,VITVI05G01830,VITVI05G01864,VITVI05G00455,VITVI05G00462,VITVI05G00513,VITVI05G00518,VITVI05G00538,VITVI05G01113,VITVI05G01117,VITVI05G02077,VITVI05…
GO:BP	photosynthesis, light reaction	GO:0019684	0.000118618	3.92585	84	373	8	35134	VITVI09G02103,VITVI00G04318,VITVI09G02052,VITVI00G04871,VITVI05G00538,VITVI10G04002,VITVI13G00384,VITVI18G00661
GO:BP	RNA modification	GO:0009451	0.000168801	3.77263	734	373	23	35134	VITVI01G00183,VITVI02G00018,VITVI03G00511,VITVI04G00291,VITVI05G00513,VITVI05G00518,VITVI05G00538,VITVI05G01113,VITVI05G01117,VITVI05G02077,VITVI06G00011,VITVI06G04438,VITVI07G00331,VITVI08G01068,VITVI09G00153,VITVI09G00225,VITVI09G00365,VITVI10G00552,VITVI12G01964,VITVI13G00656,VITVI15G00156,VITVI16G00870,VITVI18G01237
GO:BP	proton transmembrane transport	GO:1902600	0.000185279	3.73217	151	373	10	35134	VITVI01G02307,VITVI00G04351,VITVI09G02058,VITVI10G04559,VITVI03G04370,VITVI09G00006,VITVI09G01381,VITVI12G00211,VITVI14G00346,VITVI19G04613
GO:BP	nucleic acid metabolic process	GO:0090304	0.000196059	3.70761	4928	373	84	35134	VITVI07G00077,VITVI01G00183,VITVI01G00272,VITVI01G01722,VITVI02G00627,VITVI02G00018,VITVI02G00992,VITVI03G00222,VITVI03G00265,VITVI03G00511,VITVI03G00454,VITVI04G00141,VITVI04G00291,VITVI04G01231,VITVI04G01745,VITVI05G01830,VITVI05G01864,VITVI05G00455,VITVI05G00462,VITVI05G00513,VITVI05G00518,VITVI05G00538,VITVI05G01113,VITVI05G01117,VITVI05G02077,VITVI05G01494,VITVI06G00011,VITVI06G01573,VITVI06…
GO:BP	RNA metabolic process	GO:0016070	0.000214878	3.66781	3731	373	68	35134	VITVI07G00077,VITVI01G00183,VITVI01G00272,VITVI01G01722,VITVI02G00627,VITVI02G00018,VITVI03G00222,VITVI03G00265,VITVI03G00511,VITVI03G00454,VITVI04G00141,VITVI04G00291,VITVI04G01745,VITVI05G01830,VITVI05G01864,VITVI05G00455,VITVI05G00462,VITVI05G00513,VITVI05G00518,VITVI05G00538,VITVI05G01113,VITVI05G01117,VITVI05G02077,VITVI06G00011,VITVI06G01573,VITVI06G00107,VITVI06G01050,VITVI06G01169,VITVI06…
GO:BP	electron transport coupled proton transport	GO:0015990	0.000716255	3.14493	6	373	3	35134	VITVI09G02058,VITVI03G04370,VITVI12G00211
GO:BP	energy coupled proton transmembrane transport, against electrochemical gradient	GO:0015988	0.000716255	3.14493	6	373	3	35134	VITVI09G02058,VITVI03G04370,VITVI12G00211
GO:BP	catabolic process	GO:0009056	0.000833249	3.07923	1556	373	35	35134	VITVI02G00627,VITVI04G00555,VITVI05G01830,VITVI05G04047,VITVI06G00392,VITVI06G00692,VITVI06G00729,VITVI07G00408,VITVI07G00210,VITVI08G01180,VITVI08G01506,VITVI08G01539,VITVI08G01815,VITVI08G00200,VITVI08G01002,VITVI10G00571,VITVI10G00796,VITVI10G00816,VITVI10G00073,VITVI11G00058,VITVI12G00263,VITVI14G00070,VITVI14G02501,VITVI14G00191,VITVI14G01934,VITVI15G01113,VITVI15G00746,VITVI16G00870,VITVI16…
GO:BP	ribonucleoside triphosphate biosynthetic process	GO:0009201	0.000837667	3.07693	56	373	6	35134	VITVI01G02307,VITVI10G04559,VITVI02G00137,VITVI06G00692,VITVI08G01538,VITVI19G04613
GO:BP	macromolecule biosynthetic process	GO:0009059	0.000887917	3.05163	4838	373	80	35134	VITVI07G00077,VITVI01G02258,VITVI01G00071,VITVI01G00183,VITVI01G00272,VITVI01G01722,VITVI01G01822,VITVI02G00627,VITVI03G01408,VITVI03G00222,VITVI03G00265,VITVI03G00515,VITVI03G00454,VITVI04G00141,VITVI04G01231,VITVI04G01024,VITVI04G01745,VITVI05G01830,VITVI05G01864,VITVI05G00455,VITVI05G00462,VITVI05G01632,VITVI05G01516,VITVI06G01573,VITVI06G00107,VITVI06G04107,VITVI06G01050,VITVI06G01169,VITVI06…
GO:BP	nucleoside triphosphate biosynthetic process	GO:0009142	0.00118171	2.92749	60	373	6	35134	VITVI01G02307,VITVI10G04559,VITVI02G00137,VITVI06G00692,VITVI08G01538,VITVI19G04613
GO:BP	photosynthetic electron transport chain	GO:0009767	0.00118171	2.92749	37	373	5	35134	VITVI09G02103,VITVI00G04318,VITVI00G04871,VITVI13G00384,VITVI18G00661
[truncated: 194 more rows]

## Sheet: K5_GOterm
Source	Term Name	Term ID	Adjusted P Value	Negative log10 of Adjusted P Value	Term Size	Query Size	Intersection Size	Effective Domain Size	Intersections
[truncated: 107 more rows]

[truncated: 10 more sheets: K6_GOterm, K7_GOterm, K8_GOterm, K9_GOterm, K10_GOterm, K11_GOterm, K12_GOterm, K13_GOterm, K14_GOterm, K15_GOterm]
