# Supplementary material for: Transcriptome Profiling of a Salt Excluder Hybrid Grapevine Rootstock ‘Ruggeri’ throughout Salinity
Source: Plants (Basel). 2024 Mar 14;13(6):837. doi: 10.3390/plants13060837 (PMC10974295; doi:10.3390/plants13060837)
Supplement: Supplementary file 1 [file plants-13-00837-s001.zip › Tabel S5.xlsx]

## Sheet: M1_Sig_GO
Table S5: The GO-term information of the gene list of each significanlty correlated WGCNA module. Each sheet tab contains GO-term of each significanlty correlated WGCNA module (M1_GOterm, M3_GO_term, M11_GOterm, M28_GO_term, M29_GO_term, M32_GO_term).
Source	Term Name	Term ID	Adjusted P Value	Negative log10 of Adjusted P Value	Term Size	Query Size	Intersection Size	Effective Domain Size	Intersections
GO:MF	molecular_function	GO:0003674	0.000189769	3.72177	21589	279	210	35134	VITVI07G01273,VITVI13G00233,VITVI10G02222,VITVI10G00307,VITVI10G04150,VITVI10G00271,VITVI07G04609,VITVI00G04337,VITVI01G02229,VITVI01G02230,VITVI01G02232,VITVI01G00122,VITVI01G04095,VITVI01G00483,VITVI01G00554,VITVI01G00556,VITVI01G00858,VITVI01G00860,VITVI01G02099,VITVI01G01794,VITVI02G00650,VITVI02G00717,VITVI02G00034,VITVI02G00382,VITVI02G00395,VITVI02G00407,VITVI02G04111,VITVI02G00462,VITVI03…
GO:MF	signaling receptor activity	GO:0038023	0.00145072	2.83842	216	279	10	35134	VITVI05G00065,VITVI06G00518,VITVI07G02291,VITVI07G02294,VITVI08G02347,VITVI14G01373,VITVI14G01367,VITVI14G03072,VITVI14G03074,VITVI17G00644
GO:MF	molecular transducer activity	GO:0060089	0.00179524	2.74588	232	279	10	35134	VITVI05G00065,VITVI06G00518,VITVI07G02291,VITVI07G02294,VITVI08G02347,VITVI14G01373,VITVI14G01367,VITVI14G03072,VITVI14G03074,VITVI17G00644
GO:MF	transcription regulator activity	GO:0140110	0.0112284	1.94968	1166	279	22	35134	VITVI10G00271,VITVI02G00407,VITVI03G00500,VITVI03G00630,VITVI04G00190,VITVI05G00270,VITVI06G00505,VITVI07G00455,VITVI07G02069,VITVI07G01613,VITVI11G00045,VITVI11G00046,VITVI13G01916,VITVI15G00947,VITVI15G01021,VITVI16G01434,VITVI16G04340,VITVI18G00725,VITVI18G00843,VITVI18G02398,VITVI18G04287,VITVI18G02490
GO:MF	DNA-binding transcription factor activity	GO:0003700	0.0112284	1.94968	1012	279	20	35134	VITVI10G00271,VITVI02G00407,VITVI03G00500,VITVI03G00630,VITVI04G00190,VITVI06G00505,VITVI07G00455,VITVI07G02069,VITVI11G00045,VITVI11G00046,VITVI13G01916,VITVI15G00947,VITVI15G01021,VITVI16G01434,VITVI16G04340,VITVI18G00725,VITVI18G00843,VITVI18G02398,VITVI18G04287,VITVI18G02490
GO:MF	glycosyltransferase activity	GO:0016757	0.0127275	1.89526	802	279	17	35134	VITVI10G00307,VITVI01G00860,VITVI01G02099,VITVI07G01692,VITVI07G00034,VITVI08G01581,VITVI08G02289,VITVI08G01695,VITVI11G01674,VITVI11G01676,VITVI13G00358,VITVI13G00417,VITVI13G02028,VITVI13G01783,VITVI14G00608,VITVI17G00439,VITVI17G00642
GO:MF	catalytic activity	GO:0003824	0.026859	1.57091	11701	279	119	35134	VITVI10G02222,VITVI10G00307,VITVI00G04337,VITVI01G00122,VITVI01G04095,VITVI01G00483,VITVI01G00554,VITVI01G00556,VITVI01G00860,VITVI01G02099,VITVI01G01794,VITVI02G00650,VITVI02G00717,VITVI02G00034,VITVI02G00382,VITVI02G00395,VITVI02G04111,VITVI02G00462,VITVI03G01071,VITVI03G00086,VITVI03G01419,VITVI03G01434,VITVI03G00217,VITVI03G00227,VITVI03G01571,VITVI03G00481,VITVI03G04162,VITVI03G00433,VITVI03…
GO:MF	hexosyltransferase activity	GO:0016758	0.026859	1.57091	501	279	12	35134	VITVI10G00307,VITVI07G01692,VITVI07G00034,VITVI08G01581,VITVI08G02289,VITVI11G01674,VITVI11G01676,VITVI13G00417,VITVI13G02028,VITVI14G00608,VITVI17G00439,VITVI17G00642
GO:BP	cellular response to organic substance	GO:0071310	0.00533017	2.27326	588	279	15	35134	VITVI03G00500,VITVI05G00270,VITVI05G00065,VITVI05G01703,VITVI06G00518,VITVI07G00373,VITVI07G02291,VITVI07G02294,VITVI07G02069,VITVI07G01908,VITVI11G00828,VITVI13G02035,VITVI14G03072,VITVI14G03074,VITVI16G01434
GO:BP	regulation of nucleobase-containing compound metabolic process	GO:0019219	0.00533017	2.27326	2105	279	34	35134	VITVI02G00560,VITVI10G00271,VITVI02G00407,VITVI03G00500,VITVI03G00630,VITVI04G00190,VITVI05G00270,VITVI06G00505,VITVI06G01524,VITVI06G01546,VITVI07G00455,VITVI07G02069,VITVI07G01613,VITVI11G00045,VITVI11G00046,VITVI13G00614,VITVI13G01916,VITVI13G02295,VITVI14G02430,VITVI15G00947,VITVI15G01021,VITVI15G00815,VITVI15G01542,VITVI15G01543,VITVI15G01545,VITVI16G01434,VITVI16G04340,VITVI18G00725,VITVI18…
GO:BP	cellular response to endogenous stimulus	GO:0071495	0.00533017	2.27326	519	279	14	35134	VITVI03G00500,VITVI05G00270,VITVI05G00065,VITVI05G01703,VITVI06G00518,VITVI07G02291,VITVI07G02294,VITVI07G02069,VITVI07G01908,VITVI11G00828,VITVI13G02035,VITVI14G03072,VITVI14G03074,VITVI16G01434
GO:BP	external encapsulating structure organization	GO:0045229	0.00533017	2.27326	262	279	11	35134	VITVI10G00307,VITVI02G00433,VITVI04G02247,VITVI05G00076,VITVI07G01692,VITVI07G00034,VITVI10G00032,VITVI11G01674,VITVI11G01676,VITVI11G01279,VITVI19G00442
GO:BP	extracellular structure organization	GO:0043062	0.00533017	2.27326	26	279	4	35134	VITVI05G00076,VITVI10G00032,VITVI11G01279,VITVI19G00442
GO:BP	cell wall organization or biogenesis	GO:0071554	0.00533017	2.27326	391	279	13	35134	VITVI10G00307,VITVI02G00433,VITVI04G02247,VITVI05G00076,VITVI07G01692,VITVI07G00034,VITVI10G00032,VITVI11G00062,VITVI11G01674,VITVI11G01676,VITVI13G00259,VITVI17G00642,VITVI19G00442
GO:BP	cell wall organization	GO:0071555	0.00533017	2.27326	239	279	10	35134	VITVI10G00307,VITVI02G00433,VITVI04G02247,VITVI05G00076,VITVI07G01692,VITVI07G00034,VITVI10G00032,VITVI11G01674,VITVI11G01676,VITVI19G00442
GO:BP	cell wall biogenesis	GO:0042546	0.00533017	2.27326	160	279	8	35134	VITVI05G00076,VITVI07G01692,VITVI10G00032,VITVI11G00062,VITVI11G01674,VITVI11G01676,VITVI13G00259,VITVI19G00442
GO:BP	cellular response to hormone stimulus	GO:0032870	0.00533017	2.27326	514	279	14	35134	VITVI03G00500,VITVI05G00270,VITVI05G00065,VITVI05G01703,VITVI06G00518,VITVI07G02291,VITVI07G02294,VITVI07G02069,VITVI07G01908,VITVI11G00828,VITVI13G02035,VITVI14G03072,VITVI14G03074,VITVI16G01434
GO:BP	extracellular matrix organization	GO:0030198	0.00533017	2.27326	26	279	4	35134	VITVI05G00076,VITVI10G00032,VITVI11G01279,VITVI19G00442
GO:BP	regulation of RNA metabolic process	GO:0051252	0.00533017	2.27326	2028	279	33	35134	VITVI02G00560,VITVI10G00271,VITVI02G00407,VITVI03G00500,VITVI03G00630,VITVI04G00190,VITVI05G00270,VITVI06G00505,VITVI06G01524,VITVI06G01546,VITVI07G00455,VITVI07G02069,VITVI07G01613,VITVI11G00045,VITVI11G00046,VITVI13G00614,VITVI13G01916,VITVI13G02295,VITVI14G02430,VITVI15G00947,VITVI15G01021,VITVI15G00815,VITVI15G01542,VITVI15G01543,VITVI15G01545,VITVI16G01434,VITVI16G04340,VITVI18G00725,VITVI18…
GO:BP	hormone-mediated signaling pathway	GO:0009755	0.00533017	2.27326	508	279	14	35134	VITVI03G00500,VITVI05G00270,VITVI05G00065,VITVI05G01703,VITVI06G00518,VITVI07G02291,VITVI07G02294,VITVI07G02069,VITVI07G01908,VITVI11G00828,VITVI13G02035,VITVI14G03072,VITVI14G03074,VITVI16G01434
GO:BP	regulation of nitrogen compound metabolic process	GO:0051171	0.00964477	2.01571	2396	279	36	35134	VITVI02G00560,VITVI10G00271,VITVI02G00407,VITVI03G00500,VITVI03G00630,VITVI04G00190,VITVI05G00270,VITVI05G00065,VITVI06G00505,VITVI06G01524,VITVI06G01546,VITVI07G00455,VITVI07G02069,VITVI07G01908,VITVI07G01613,VITVI11G00045,VITVI11G00046,VITVI13G00614,VITVI13G01916,VITVI13G02295,VITVI14G02430,VITVI15G00947,VITVI15G01021,VITVI15G00815,VITVI15G01542,VITVI15G01543,VITVI15G01545,VITVI16G01434,VITVI16…
GO:BP	plant-type cell wall organization or biogenesis	GO:0071669	0.00964477	2.01571	149	279	7	35134	VITVI02G00433,VITVI05G00076,VITVI07G01692,VITVI10G00032,VITVI11G00062,VITVI13G00259,VITVI19G00442
GO:BP	regulation of RNA biosynthetic process	GO:2001141	0.00964477	2.01571	1952	279	31	35134	VITVI02G00560,VITVI10G00271,VITVI02G00407,VITVI03G00500,VITVI03G00630,VITVI04G00190,VITVI05G00270,VITVI06G00505,VITVI07G00455,VITVI07G02069,VITVI07G01613,VITVI11G00045,VITVI11G00046,VITVI13G00614,VITVI13G01916,VITVI13G02295,VITVI14G02430,VITVI15G00947,VITVI15G01021,VITVI15G00815,VITVI15G01542,VITVI15G01543,VITVI15G01545,VITVI16G01434,VITVI16G04340,VITVI18G00725,VITVI18G00843,VITVI18G02732,VITVI18…
GO:BP	regulation of DNA-templated transcription	GO:0006355	0.00964477	2.01571	1952	279	31	35134	VITVI02G00560,VITVI10G00271,VITVI02G00407,VITVI03G00500,VITVI03G00630,VITVI04G00190,VITVI05G00270,VITVI06G00505,VITVI07G00455,VITVI07G02069,VITVI07G01613,VITVI11G00045,VITVI11G00046,VITVI13G00614,VITVI13G01916,VITVI13G02295,VITVI14G02430,VITVI15G00947,VITVI15G01021,VITVI15G00815,VITVI15G01542,VITVI15G01543,VITVI15G01545,VITVI16G01434,VITVI16G04340,VITVI18G00725,VITVI18G00843,VITVI18G02732,VITVI18…
GO:BP	cellulose microfibril organization	GO:0010215	0.0105858	1.97527	16	279	3	35134	VITVI05G00076,VITVI10G00032,VITVI19G00442
GO:BP	DNA-templated transcription	GO:0006351	0.0105858	1.97527	2153	279	33	35134	VITVI02G00560,VITVI10G00271,VITVI02G00407,VITVI03G00500,VITVI03G00630,VITVI04G00190,VITVI05G00270,VITVI06G00505,VITVI07G00455,VITVI07G02069,VITVI07G01613,VITVI08G02233,VITVI11G00045,VITVI11G00046,VITVI13G00614,VITVI13G01916,VITVI13G02295,VITVI14G02430,VITVI15G00947,VITVI15G01021,VITVI15G00815,VITVI15G01542,VITVI15G01543,VITVI15G01545,VITVI16G01434,VITVI16G04340,VITVI18G00725,VITVI18G00843,VITVI18…
GO:BP	RNA biosynthetic process	GO:0032774	0.0105858	1.97527	2165	279	33	35134	VITVI02G00560,VITVI10G00271,VITVI02G00407,VITVI03G00500,VITVI03G00630,VITVI04G00190,VITVI05G00270,VITVI06G00505,VITVI07G00455,VITVI07G02069,VITVI07G01613,VITVI08G02233,VITVI11G00045,VITVI11G00046,VITVI13G00614,VITVI13G01916,VITVI13G02295,VITVI14G02430,VITVI15G00947,VITVI15G01021,VITVI15G00815,VITVI15G01542,VITVI15G01543,VITVI15G01545,VITVI16G01434,VITVI16G04340,VITVI18G00725,VITVI18G00843,VITVI18…
GO:BP	plant-type cell wall assembly	GO:0071668	0.0113003	1.94691	17	279	3	35134	VITVI05G00076,VITVI10G00032,VITVI19G00442
GO:BP	cell wall assembly	GO:0070726	0.0113003	1.94691	17	279	3	35134	VITVI05G00076,VITVI10G00032,VITVI19G00442
GO:BP	plant-type cell wall biogenesis	GO:0009832	0.0123698	1.90764	117	279	6	35134	VITVI05G00076,VITVI07G01692,VITVI10G00032,VITVI11G00062,VITVI13G00259,VITVI19G00442
GO:BP	defense response to Gram-negative bacterium	GO:0050829	0.0124084	1.90629	4	279	2	35134	VITVI05G01108,VITVI07G01908
GO:BP	ethylene-activated signaling pathway	GO:0009873	0.0135499	1.86806	79	279	5	35134	VITVI03G00500,VITVI06G00518,VITVI07G02069,VITVI07G01908,VITVI16G01434
GO:BP	cellular response to ethylene stimulus	GO:0071369	0.0137861	1.86056	80	279	5	35134	VITVI03G00500,VITVI06G00518,VITVI07G02069,VITVI07G01908,VITVI16G01434
GO:BP	regulation of cellular process	GO:0050794	0.0143881	1.842	3813	279	49	35134	VITVI02G00560,VITVI10G00271,VITVI02G00407,VITVI03G00227,VITVI03G00500,VITVI03G00630,VITVI04G00190,VITVI05G00270,VITVI05G00065,VITVI05G01703,VITVI05G01454,VITVI06G00505,VITVI06G00518,VITVI06G01524,VITVI06G01546,VITVI07G00373,VITVI07G00455,VITVI07G02291,VITVI07G02294,VITVI07G02069,VITVI07G01908,VITVI07G01613,VITVI09G00273,VITVI11G00045,VITVI11G00046,VITVI11G00828,VITVI13G02035,VITVI13G00614,VITVI13…
GO:BP	regulation of cellular metabolic process	GO:0031323	0.0153149	1.81488	2637	279	37	35134	VITVI02G00560,VITVI10G00271,VITVI02G00407,VITVI03G00500,VITVI03G00630,VITVI04G00190,VITVI05G00270,VITVI05G00065,VITVI05G01703,VITVI06G00505,VITVI06G01524,VITVI06G01546,VITVI07G00455,VITVI07G02069,VITVI07G01908,VITVI07G01613,VITVI11G00045,VITVI11G00046,VITVI13G00614,VITVI13G01916,VITVI13G02295,VITVI14G02430,VITVI15G00947,VITVI15G01021,VITVI15G00815,VITVI15G01542,VITVI15G01543,VITVI15G01545,VITVI16…
GO:BP	regulation of primary metabolic process	GO:0080090	0.0157577	1.80251	2454	279	35	35134	VITVI02G00560,VITVI10G00271,VITVI02G00407,VITVI03G00500,VITVI03G00630,VITVI04G00190,VITVI05G00270,VITVI05G00065,VITVI06G00505,VITVI06G01524,VITVI06G01546,VITVI07G00455,VITVI07G02069,VITVI07G01613,VITVI11G00045,VITVI11G00046,VITVI13G00614,VITVI13G01916,VITVI13G02295,VITVI14G02430,VITVI15G00947,VITVI15G01021,VITVI15G00815,VITVI15G01542,VITVI15G01543,VITVI15G01545,VITVI16G01434,VITVI16G04340,VITVI18…
GO:BP	xyloglucan metabolic process	GO:0010411	0.0192676	1.71517	52	279	4	35134	VITVI11G00062,VITVI11G01674,VITVI11G01676,VITVI17G00642
GO:BP	regulation of biosynthetic process	GO:0009889	0.0192676	1.71517	2399	279	34	35134	VITVI02G00560,VITVI10G00271,VITVI02G00407,VITVI03G00500,VITVI03G00630,VITVI04G00190,VITVI05G00270,VITVI06G00505,VITVI06G01524,VITVI06G01546,VITVI07G00455,VITVI07G02069,VITVI07G01908,VITVI07G01613,VITVI11G00045,VITVI11G00046,VITVI13G00614,VITVI13G01916,VITVI13G02295,VITVI14G02430,VITVI15G00947,VITVI15G01021,VITVI15G00815,VITVI15G01542,VITVI15G01543,VITVI15G01545,VITVI16G01434,VITVI16G04340,VITVI18…
GO:BP	regulation of cellular biosynthetic process	GO:0031326	0.0192676	1.71517	2393	279	34	35134	VITVI02G00560,VITVI10G00271,VITVI02G00407,VITVI03G00500,VITVI03G00630,VITVI04G00190,VITVI05G00270,VITVI06G00505,VITVI06G01524,VITVI06G01546,VITVI07G00455,VITVI07G02069,VITVI07G01908,VITVI07G01613,VITVI11G00045,VITVI11G00046,VITVI13G00614,VITVI13G01916,VITVI13G02295,VITVI14G02430,VITVI15G00947,VITVI15G01021,VITVI15G00815,VITVI15G01542,VITVI15G01543,VITVI15G01545,VITVI16G01434,VITVI16G04340,VITVI18…
GO:BP	plant-type cell wall organization	GO:0009664	0.0214296	1.66899	54	279	4	35134	VITVI02G00433,VITVI05G00076,VITVI10G00032,VITVI19G00442
GO:BP	regulation of gene expression	GO:0010468	0.0214296	1.66899	2328	279	33	35134	VITVI02G00560,VITVI10G00271,VITVI02G00407,VITVI03G00500,VITVI03G00630,VITVI04G00190,VITVI05G00270,VITVI06G00505,VITVI06G01524,VITVI06G01546,VITVI07G00455,VITVI07G02069,VITVI07G01613,VITVI11G00045,VITVI11G00046,VITVI13G00614,VITVI13G01916,VITVI13G02295,VITVI14G02430,VITVI15G00947,VITVI15G01021,VITVI15G00815,VITVI15G01542,VITVI15G01543,VITVI15G01545,VITVI16G01434,VITVI16G04340,VITVI18G00725,VITVI18…
GO:BP	regulation of metabolic process	GO:0019222	0.0247528	1.60638	2742	279	37	35134	VITVI02G00560,VITVI10G00271,VITVI02G00407,VITVI03G00500,VITVI03G00630,VITVI04G00190,VITVI05G00270,VITVI05G00065,VITVI05G01703,VITVI06G00505,VITVI06G01524,VITVI06G01546,VITVI07G00455,VITVI07G02069,VITVI07G01908,VITVI07G01613,VITVI11G00045,VITVI11G00046,VITVI13G00614,VITVI13G01916,VITVI13G02295,VITVI14G02430,VITVI15G00947,VITVI15G01021,VITVI15G00815,VITVI15G01542,VITVI15G01543,VITVI15G01545,VITVI16…
GO:BP	regulation of macromolecule biosynthetic process	GO:0010556	0.0272376	1.56483	2376	279	33	35134	VITVI02G00560,VITVI10G00271,VITVI02G00407,VITVI03G00500,VITVI03G00630,VITVI04G00190,VITVI05G00270,VITVI06G00505,VITVI06G01524,VITVI06G01546,VITVI07G00455,VITVI07G02069,VITVI07G01613,VITVI11G00045,VITVI11G00046,VITVI13G00614,VITVI13G01916,VITVI13G02295,VITVI14G02430,VITVI15G00947,VITVI15G01021,VITVI15G00815,VITVI15G01542,VITVI15G01543,VITVI15G01545,VITVI16G01434,VITVI16G04340,VITVI18G00725,VITVI18…
GO:BP	regulation of biological process	GO:0050789	0.0272376	1.56483	4094	279	50	35134	VITVI02G00560,VITVI10G00271,VITVI02G00407,VITVI03G00227,VITVI03G00500,VITVI03G00630,VITVI04G00190,VITVI05G00270,VITVI05G00065,VITVI05G01703,VITVI05G01454,VITVI06G00505,VITVI06G00518,VITVI06G01524,VITVI06G01546,VITVI07G00373,VITVI07G00455,VITVI07G02291,VITVI07G02294,VITVI07G02069,VITVI07G01908,VITVI07G01613,VITVI09G00273,VITVI10G00138,VITVI11G00045,VITVI11G00046,VITVI11G00828,VITVI13G02035,VITVI13…
GO:BP	cellular response to chemical stimulus	GO:0070887	0.0272376	1.56483	846	279	16	35134	VITVI03G00500,VITVI05G00270,VITVI05G00065,VITVI05G01703,VITVI06G00518,VITVI07G00373,VITVI07G02291,VITVI07G02294,VITVI07G02069,VITVI07G01908,VITVI08G00822,VITVI11G00828,VITVI13G02035,VITVI14G03072,VITVI14G03074,VITVI16G01434
GO:BP	response to ethylene	GO:0009723	0.0272829	1.56411	102	279	5	35134	VITVI03G00500,VITVI06G00518,VITVI07G02069,VITVI07G01908,VITVI16G01434
GO:BP	hemicellulose metabolic process	GO:0010410	0.0302315	1.51954	105	279	5	35134	VITVI07G01692,VITVI11G00062,VITVI11G01674,VITVI11G01676,VITVI17G00642
GO:BP	response to chitin	GO:0010200	0.0326028	1.48675	8	279	2	35134	VITVI03G00630,VITVI06G01682
GO:BP	regulation of defense response to bacterium	GO:1900424	0.0397184	1.40101	9	279	2	35134	VITVI07G01908,VITVI10G00138
GO:BP	regulation of macromolecule metabolic process	GO:0060255	0.0397184	1.40101	2652	279	35	35134	VITVI02G00560,VITVI10G00271,VITVI02G00407,VITVI03G00500,VITVI03G00630,VITVI04G00190,VITVI05G00270,VITVI05G00065,VITVI06G00505,VITVI06G01524,VITVI06G01546,VITVI07G00455,VITVI07G02069,VITVI07G01613,VITVI11G00045,VITVI11G00046,VITVI13G00614,VITVI13G01916,VITVI13G02295,VITVI14G02430,VITVI15G00947,VITVI15G01021,VITVI15G00815,VITVI15G01542,VITVI15G01543,VITVI15G01545,VITVI16G01434,VITVI16G04340,VITVI18…
GO:BP	cell wall polysaccharide metabolic process	GO:0010383	0.0440607	1.35595	117	279	5	35134	VITVI07G01692,VITVI11G00062,VITVI11G01674,VITVI11G01676,VITVI17G00642
GO:CC	cellular anatomical entity	GO:0110165	2.17977e-06	5.66159	17432	279	184	35134	VITVI07G01273,VITVI05G01556,VITVI02G00560,VITVI13G00233,VITVI10G02222,VITVI10G00307,VITVI10G00271,VITVI07G04609,VITVI00G04337,VITVI01G00122,VITVI01G04095,VITVI01G00483,VITVI01G00554,VITVI01G00556,VITVI01G00858,VITVI01G00860,VITVI01G02099,VITVI02G01482,VITVI02G00382,VITVI02G00395,VITVI02G00407,VITVI02G00433,VITVI02G00462,VITVI03G00209,VITVI03G00227,VITVI03G00242,VITVI03G00500,VITVI03G00365,VITVI03…
GO:CC	cellular_component	GO:0005575	2.17977e-06	5.66159	17597	279	185	35134	VITVI07G01273,VITVI05G01556,VITVI02G00560,VITVI13G00233,VITVI10G02222,VITVI10G00307,VITVI10G00271,VITVI07G04609,VITVI00G04337,VITVI01G00122,VITVI01G04095,VITVI01G00483,VITVI01G00554,VITVI01G00556,VITVI01G00858,VITVI01G00860,VITVI01G02099,VITVI02G01482,VITVI02G00382,VITVI02G00395,VITVI02G00407,VITVI02G00433,VITVI02G00462,VITVI03G00209,VITVI03G00227,VITVI03G00242,VITVI03G00500,VITVI03G00365,VITVI03…
GO:CC	cell periphery	GO:0071944	0.00115085	2.93898	1673	279	30	35134	VITVI07G01273,VITVI13G00233,VITVI02G00433,VITVI03G00209,VITVI06G00678,VITVI06G00947,VITVI06G01404,VITVI07G02291,VITVI07G02294,VITVI07G02131,VITVI08G02347,VITVI09G00159,VITVI09G00273,VITVI11G00828,VITVI11G01674,VITVI11G01676,VITVI11G01279,VITVI13G02035,VITVI14G01373,VITVI14G01440,VITVI14G01367,VITVI14G03072,VITVI14G03074,VITVI14G01596,VITVI17G00162,VITVI17G00644,VITVI18G00202,VITVI18G00237,VITVI18…
GO:CC	membrane	GO:0016020	0.00115085	2.93898	9855	279	110	35134	VITVI07G01273,VITVI05G01556,VITVI02G00560,VITVI10G02222,VITVI10G00307,VITVI00G04337,VITVI01G04095,VITVI01G00858,VITVI01G00860,VITVI01G02099,VITVI02G01482,VITVI02G00382,VITVI02G00395,VITVI02G00433,VITVI02G00462,VITVI03G00365,VITVI03G00322,VITVI03G01727,VITVI04G00338,VITVI04G00503,VITVI04G01937,VITVI04G02247,VITVI05G00377,VITVI05G00399,VITVI05G01900,VITVI05G00600,VITVI05G00616,VITVI05G00654,VITVI05…
GO:CC	Golgi apparatus	GO:0005794	0.00291469	2.53541	671	279	16	35134	VITVI10G00307,VITVI01G00860,VITVI02G01482,VITVI05G01108,VITVI05G01454,VITVI07G00373,VITVI07G01692,VITVI07G00034,VITVI11G00062,VITVI12G00122,VITVI12G00753,VITVI13G00358,VITVI14G00608,VITVI14G00061,VITVI17G00642,VITVI18G01243
GO:CC	extracellular space	GO:0005615	0.00291469	2.53541	95	279	6	35134	VITVI03G00242,VITVI18G00424,VITVI18G00425,VITVI18G00432,VITVI18G02584,VITVI18G00433
GO:CC	extracellular region	GO:0005576	0.00687501	2.16273	739	279	16	35134	VITVI02G00433,VITVI03G00209,VITVI03G00242,VITVI06G01033,VITVI07G02131,VITVI08G00822,VITVI08G00853,VITVI11G01674,VITVI11G01676,VITVI17G01451,VITVI18G00424,VITVI18G00425,VITVI18G00432,VITVI18G02584,VITVI18G00433,VITVI18G01131
GO:CC	endomembrane system	GO:0012505	0.0276328	1.55858	1455	279	23	35134	VITVI10G00307,VITVI01G00860,VITVI02G01482,VITVI05G00654,VITVI05G01108,VITVI05G01454,VITVI06G00322,VITVI06G00518,VITVI06G01498,VITVI07G00373,VITVI07G01692,VITVI07G01804,VITVI07G00034,VITVI08G01695,VITVI11G00062,VITVI12G00122,VITVI12G00753,VITVI13G00358,VITVI14G00608,VITVI14G00061,VITVI17G00642,VITVI18G00258,VITVI18G01243
GO:CC	Golgi membrane	GO:0000139	0.0303152	1.51834	220	279	7	35134	VITVI10G00307,VITVI02G01482,VITVI07G01692,VITVI07G00034,VITVI13G00358,VITVI17G00642,VITVI18G01243
GO:CC	trans-Golgi network	GO:0005802	0.0303152	1.51834	113	279	5	35134	VITVI05G01108,VITVI07G00373,VITVI14G00608,VITVI17G00642,VITVI18G01243
GO:CC	plasma membrane	GO:0005886	0.0303152	1.51834	1412	279	22	35134	VITVI07G01273,VITVI06G00678,VITVI06G01404,VITVI07G02291,VITVI07G02294,VITVI07G02131,VITVI08G02347,VITVI09G00159,VITVI11G00828,VITVI13G02035,VITVI14G01373,VITVI14G01440,VITVI14G01367,VITVI14G03072,VITVI14G03074,VITVI14G01596,VITVI17G00162,VITVI17G00644,VITVI18G00202,VITVI18G00237,VITVI18G00270,VITVI18G01610
GO:CC	Golgi apparatus subcompartment	GO:0098791	0.0496505	1.30408	130	279	5	35134	VITVI05G01108,VITVI07G00373,VITVI14G00608,VITVI17G00642,VITVI18G01243

## Sheet: M3_Sig_GO
Source	Term Name	Term ID	Adjusted P Value	Negative log10 of Adjusted P Value	Term Size	Query Size	Intersection Size	Effective Domain Size	Intersections
GO:MF	naringenin 3-dioxygenase activity	GO:0045486	0.00933476	2.0299	2	8	1	35134	VITVI18G01119
GO:MF	2,3-bisphosphoglycerate-dependent phosphoglycerate mutase activity	GO:0046538	0.00933476	2.0299	1	8	1	35134	VITVI18G02571
GO:MF	ATPase activator activity	GO:0001671	0.0186584	1.72913	8	8	1	35134	VITVI08G01072
GO:MF	phosphoglycerate mutase activity	GO:0004619	0.0186584	1.72913	6	8	1	35134	VITVI18G02571
GO:MF	intramolecular transferase activity, phosphotransferases	GO:0016868	0.027968	1.55334	15	8	1	35134	VITVI18G02571
GO:MF	ATPase regulator activity	GO:0060590	0.02951	1.53003	19	8	1	35134	VITVI08G01072
GO:MF	trihydroxystilbene synthase activity	GO:0050350	0.0306072	1.51418	23	8	1	35134	VITVI16G01485
GO:MF	N,N-dimethylaniline monooxygenase activity	GO:0004499	0.0372276	1.42913	32	8	1	35134	VITVI04G00193
GO:MF	oxidoreductase activity, acting on paired donors, with incorporation or reduction of molecular oxygen	GO:0016705	0.0408463	1.38885	653	8	2	35134	VITVI04G00193,VITVI18G01119
GO:CC	PAM complex, Tim23 associated import motor	GO:0001405	0.0382345	1.41754	6	8	1	35134	VITVI08G01072
KEGG	Biosynthesis of secondary metabolites	KEGG:01110	0.00377545	2.42303	681	8	3	35134	VITVI16G01485,VITVI18G02571,VITVI18G01119
KEGG	Metabolic pathways	KEGG:01100	0.00625551	2.20374	1235	8	3	35134	VITVI04G00193,VITVI18G02571,VITVI18G01119
KEGG	KEGG root term	KEGG:00000	0.00625551	2.20374	2608	8	4	35134	VITVI04G00193,VITVI16G01485,VITVI18G02571,VITVI18G01119
KEGG	Taurine and hypotaurine metabolism	KEGG:00430	0.00625551	2.20374	11	8	1	35134	VITVI04G00193
KEGG	Stilbenoid, diarylheptanoid and gingerol biosynthesis	KEGG:00945	0.00946483	2.02389	21	8	1	35134	VITVI16G01485
KEGG	Flavonoid biosynthesis	KEGG:00941	0.00946483	2.02389	25	8	1	35134	VITVI18G01119
KEGG	Glycine, serine and threonine metabolism	KEGG:00260	0.0142514	1.84614	44	8	1	35134	VITVI18G02571
KEGG	Glycolysis / Gluconeogenesis	KEGG:00010	0.0206292	1.68552	73	8	1	35134	VITVI18G02571
KEGG	Biosynthesis of amino acids	KEGG:01230	0.0323254	1.49046	131	8	1	35134	VITVI18G02571
KEGG	Carbon metabolism	KEGG:01200	0.0323254	1.49046	144	8	1	35134	VITVI18G02571

## Sheet: M11_Sig_GO
Source	Term Name	Term ID	Adjusted P Value	Negative log10 of Adjusted P Value	Term Size	Query Size	Intersection Size	Effective Domain Size	Intersections
GO:MF	molecular_function	GO:0003674	7.82946e-39	38.1063	21589	1573	1213	35134	VITVI07G01200,VITVI07G01205,VITVI07G00081,VITVI10G00358,VITVI10G00359,VITVI10G01751,VITVI10G00209,VITVI10G04078,VITVI10G01666,VITVI07G02582,VITVI13G04636,VITVI07G04489,VITVI07G01405,VITVI07G01247,VITVI07G01219,VITVI02G00565,VITVI08G02419,VITVI08G01959,VITVI10G00252,VITVI15G04172,VITVI17G01311,VITVI02G01720,VITVI04G04411,VITVI07G01437,VITVI02G00499,VITVI07G02948,VITVI07G04656,VITVI10G04226,VITVI07…
GO:MF	RNA binding	GO:0003723	4.11242e-38	37.3859	1956	1573	227	35134	VITVI07G01405,VITVI07G02948,VITVI04G01545,VITVI07G04579,VITVI07G02548,VITVI00G04706,VITVI01G01565,VITVI01G00079,VITVI01G00150,VITVI01G00156,VITVI01G00355,VITVI01G00450,VITVI01G00482,VITVI01G00823,VITVI01G04213,VITVI01G00960,VITVI01G01020,VITVI01G02047,VITVI01G02053,VITVI01G01740,VITVI02G00656,VITVI02G00715,VITVI02G00007,VITVI02G01314,VITVI02G01321,VITVI02G00389,VITVI02G01098,VITVI02G04409,VITVI03…
GO:MF	binding	GO:0005488	9.3058e-17	16.0312	15172	1573	851	35134	VITVI07G00081,VITVI10G00359,VITVI10G01751,VITVI13G04636,VITVI07G01405,VITVI07G01219,VITVI08G01959,VITVI10G00252,VITVI15G04172,VITVI17G01311,VITVI07G02948,VITVI07G04656,VITVI10G04226,VITVI10G00387,VITVI05G04409,VITVI10G00417,VITVI04G01545,VITVI00G04504,VITVI00G04505,VITVI07G04579,VITVI04G01541,VITVI07G02548,VITVI00G04706,VITVI02G04136,VITVI07G04646,VITVI00G04860,VITVI01G01302,VITVI01G01457,VITVI01…
GO:MF	nucleic acid binding	GO:0003676	9.3058e-17	16.0312	5249	1573	366	35134	VITVI07G01405,VITVI07G01219,VITVI07G02948,VITVI04G01545,VITVI07G04579,VITVI07G02548,VITVI00G04706,VITVI00G04860,VITVI01G01565,VITVI01G00079,VITVI01G00150,VITVI01G00156,VITVI01G00355,VITVI01G00450,VITVI01G00482,VITVI01G00545,VITVI01G00823,VITVI01G04213,VITVI01G00934,VITVI01G00960,VITVI01G01020,VITVI01G02047,VITVI01G02053,VITVI01G00594,VITVI01G00634,VITVI01G01740,VITVI02G00656,VITVI02G00660,VITVI02…
GO:MF	mRNA binding	GO:0003729	5.31564e-15	14.2744	511	1573	71	35134	VITVI07G02948,VITVI07G02548,VITVI01G00150,VITVI01G00156,VITVI01G00482,VITVI01G00823,VITVI02G00715,VITVI02G01098,VITVI03G00189,VITVI03G00495,VITVI04G00066,VITVI04G00134,VITVI04G00261,VITVI04G02132,VITVI04G01592,VITVI05G00278,VITVI05G00335,VITVI05G00639,VITVI05G00060,VITVI06G00107,VITVI06G00123,VITVI06G00503,VITVI06G00651,VITVI06G04445,VITVI07G00683,VITVI07G00831,VITVI07G01878,VITVI07G00197,VITVI07…
GO:MF	catalytic activity	GO:0003824	5.31564e-15	14.2744	11701	1573	680	35134	VITVI07G01200,VITVI07G01205,VITVI10G04078,VITVI10G01666,VITVI07G02582,VITVI13G04636,VITVI07G04489,VITVI07G01405,VITVI07G01247,VITVI07G01219,VITVI02G00565,VITVI10G00252,VITVI15G04172,VITVI02G01720,VITVI04G04411,VITVI07G01437,VITVI07G04656,VITVI10G04226,VITVI07G03041,VITVI05G04409,VITVI10G00417,VITVI15G04503,VITVI07G03105,VITVI00G04504,VITVI00G04505,VITVI07G04669,VITVI04G01541,VITVI04G02288,VITVI10…
GO:MF	structural molecule activity	GO:0005198	4.45794e-12	11.3509	559	1573	69	35134	VITVI07G04656,VITVI07G02548,VITVI01G01620,VITVI01G02258,VITVI02G00842,VITVI02G01321,VITVI02G00111,VITVI02G00249,VITVI02G00327,VITVI02G00340,VITVI03G01190,VITVI04G00064,VITVI04G00149,VITVI04G02132,VITVI04G01432,VITVI04G01439,VITVI05G00254,VITVI05G00455,VITVI05G01254,VITVI05G00157,VITVI06G00051,VITVI06G01684,VITVI06G01685,VITVI06G00651,VITVI06G01847,VITVI06G01433,VITVI06G01491,VITVI06G04445,VITVI07…
GO:MF	hydrolase activity	GO:0016787	2.04271e-11	10.6898	3763	1573	262	35134	VITVI07G01200,VITVI07G01205,VITVI07G02582,VITVI13G04636,VITVI07G04489,VITVI07G01219,VITVI10G00252,VITVI07G04656,VITVI00G04504,VITVI00G04505,VITVI10G00213,VITVI01G01563,VITVI01G01565,VITVI01G01845,VITVI01G00132,VITVI01G00137,VITVI01G00166,VITVI01G00280,VITVI01G00333,VITVI01G01956,VITVI01G00390,VITVI01G00450,VITVI01G00823,VITVI01G04213,VITVI01G00932,VITVI01G00594,VITVI01G00603,VITVI01G00629,VITVI01…
GO:MF	structural constituent of ribosome	GO:0003735	2.72328e-10	9.56491	390	1573	52	35134	VITVI07G02548,VITVI01G02258,VITVI02G01321,VITVI02G00249,VITVI03G01190,VITVI04G00064,VITVI04G00149,VITVI04G02132,VITVI04G01439,VITVI05G00254,VITVI05G00455,VITVI05G01254,VITVI05G00157,VITVI06G00651,VITVI06G01433,VITVI06G01491,VITVI06G04445,VITVI07G04166,VITVI07G00025,VITVI07G00121,VITVI07G01329,VITVI08G01778,VITVI08G01147,VITVI09G00119,VITVI10G00712,VITVI10G01883,VITVI11G00103,VITVI11G00222,VITVI12…
GO:MF	organic cyclic compound binding	GO:0097159	5.88316e-10	9.23039	10094	1573	574	35134	VITVI07G01405,VITVI07G01219,VITVI07G02948,VITVI07G04656,VITVI10G00417,VITVI04G01545,VITVI00G04504,VITVI00G04505,VITVI07G04579,VITVI07G02548,VITVI00G04706,VITVI07G04646,VITVI00G04860,VITVI01G01565,VITVI01G00031,VITVI01G00079,VITVI01G00133,VITVI01G00137,VITVI01G00150,VITVI01G00156,VITVI01G00355,VITVI01G00390,VITVI01G00450,VITVI01G00482,VITVI01G00526,VITVI01G00545,VITVI01G00823,VITVI01G04213,VITVI01…
GO:MF	heterocyclic compound binding	GO:1901363	6.16854e-10	9.20982	10081	1573	573	35134	VITVI07G01405,VITVI07G01219,VITVI07G02948,VITVI07G04656,VITVI10G00417,VITVI04G01545,VITVI00G04504,VITVI00G04505,VITVI07G04579,VITVI07G02548,VITVI00G04706,VITVI07G04646,VITVI00G04860,VITVI01G01565,VITVI01G00031,VITVI01G00079,VITVI01G00133,VITVI01G00137,VITVI01G00150,VITVI01G00156,VITVI01G00355,VITVI01G00390,VITVI01G00450,VITVI01G00482,VITVI01G00526,VITVI01G00545,VITVI01G00823,VITVI01G04213,VITVI01…
GO:MF	isomerase activity	GO:0016853	2.13722e-06	5.67015	325	1573	39	35134	VITVI07G03105,VITVI01G00442,VITVI01G01705,VITVI01G01779,VITVI03G00097,VITVI03G04055,VITVI03G01568,VITVI04G00261,VITVI04G00264,VITVI05G00977,VITVI05G01320,VITVI06G00160,VITVI06G00213,VITVI06G00284,VITVI06G00346,VITVI06G00643,VITVI06G01518,VITVI07G00508,VITVI07G00128,VITVI08G02190,VITVI08G00941,VITVI09G02008,VITVI11G01211,VITVI12G04066,VITVI12G04607,VITVI12G00353,VITVI12G00453,VITVI13G00602,VITVI13…
GO:MF	catalytic activity, acting on a nucleic acid	GO:0140640	5.33297e-05	4.27303	1028	1573	81	35134	VITVI07G01405,VITVI07G01219,VITVI10G04126,VITVI01G01565,VITVI01G00823,VITVI01G04213,VITVI02G00318,VITVI02G00341,VITVI02G00389,VITVI02G00444,VITVI03G00170,VITVI03G00319,VITVI04G00189,VITVI04G00261,VITVI04G02109,VITVI04G01592,VITVI04G01692,VITVI05G00278,VITVI05G00849,VITVI05G01320,VITVI05G01592,VITVI06G00086,VITVI06G00160,VITVI06G01070,VITVI06G01163,VITVI07G01891,VITVI07G01619,VITVI08G01393,VITVI08…
GO:MF	protein binding	GO:0005515	0.000100068	3.9997	4981	1573	289	35134	VITVI07G00081,VITVI10G00359,VITVI10G01751,VITVI13G04636,VITVI08G01959,VITVI17G01311,VITVI10G04226,VITVI10G00387,VITVI05G04409,VITVI10G00417,VITVI00G04706,VITVI01G01302,VITVI01G01457,VITVI01G01576,VITVI01G00079,VITVI01G00086,VITVI01G00150,VITVI01G00156,VITVI01G00166,VITVI01G00243,VITVI01G00450,VITVI01G00499,VITVI01G00526,VITVI01G00543,VITVI01G00799,VITVI01G00819,VITVI01G04240,VITVI01G01020,VITVI01…
GO:MF	RNA helicase activity	GO:0003724	0.000170437	3.76844	81	1573	15	35134	VITVI01G01565,VITVI01G00823,VITVI02G00389,VITVI05G00278,VITVI06G00086,VITVI06G01070,VITVI11G00152,VITVI13G00111,VITVI13G01841,VITVI15G04674,VITVI14G01940,VITVI15G00993,VITVI17G00262,VITVI17G00388,VITVI18G01543
GO:MF	ATP-dependent activity, acting on RNA	GO:0008186	0.000170437	3.76844	81	1573	15	35134	VITVI01G01565,VITVI01G00823,VITVI02G00389,VITVI05G00278,VITVI06G00086,VITVI06G01070,VITVI11G00152,VITVI13G00111,VITVI13G01841,VITVI15G04674,VITVI14G01940,VITVI15G00993,VITVI17G00262,VITVI17G00388,VITVI18G01543
GO:MF	unfolded protein binding	GO:0051082	0.000215341	3.66687	150	1573	21	35134	VITVI17G01311,VITVI01G00594,VITVI02G00187,VITVI04G01198,VITVI05G01545,VITVI07G00394,VITVI07G01891,VITVI07G02050,VITVI08G00070,VITVI12G00751,VITVI13G01291,VITVI14G01224,VITVI15G00492,VITVI16G01333,VITVI16G01391,VITVI16G01413,VITVI17G00171,VITVI17G00263,VITVI17G01403,VITVI18G01133,VITVI19G00723
GO:MF	rRNA binding	GO:0019843	0.00034274	3.46503	108	1573	17	35134	VITVI02G01321,VITVI05G00157,VITVI06G00107,VITVI06G00651,VITVI06G04445,VITVI07G00323,VITVI07G04166,VITVI07G01999,VITVI07G01329,VITVI09G00119,VITVI10G01883,VITVI12G00164,VITVI13G01540,VITVI13G00106,VITVI14G00746,VITVI15G00377,VITVI17G04155
GO:MF	snoRNA binding	GO:0030515	0.000384314	3.41531	18	1573	7	35134	VITVI08G01588,VITVI08G01813,VITVI10G00908,VITVI13G01540,VITVI14G00383,VITVI17G00141,VITVI18G00099
GO:MF	hydrolase activity, acting on acid anhydrides	GO:0016817	0.000462968	3.33445	878	1573	68	35134	VITVI01G00132,VITVI01G00137,VITVI01G00333,VITVI01G00390,VITVI01G00594,VITVI02G00082,VITVI02G00187,VITVI02G00327,VITVI02G00340,VITVI02G00445,VITVI03G00348,VITVI03G00777,VITVI04G04112,VITVI04G01307,VITVI04G01014,VITVI04G01575,VITVI04G01743,VITVI05G00335,VITVI05G01784,VITVI06G00051,VITVI06G01847,VITVI06G01288,VITVI07G02301,VITVI07G01838,VITVI07G00186,VITVI07G02050,VITVI07G01504,VITVI08G01467,VITVI08…
GO:MF	ribonucleoside triphosphate phosphatase activity	GO:0017111	0.000462968	3.33445	778	1573	62	35134	VITVI01G00137,VITVI01G00333,VITVI01G00390,VITVI01G00594,VITVI02G00082,VITVI02G00187,VITVI02G00327,VITVI02G00340,VITVI03G00348,VITVI03G00777,VITVI04G04112,VITVI04G01307,VITVI04G01014,VITVI04G01575,VITVI04G01743,VITVI05G00335,VITVI05G01784,VITVI06G00051,VITVI06G01847,VITVI06G01288,VITVI07G02301,VITVI07G01838,VITVI07G00186,VITVI07G02050,VITVI07G01504,VITVI08G01467,VITVI08G00177,VITVI08G00956,VITVI08…
GO:MF	protein folding chaperone	GO:0044183	0.000484424	3.31477	124	1573	18	35134	VITVI01G00137,VITVI01G00594,VITVI02G00187,VITVI04G01014,VITVI06G00222,VITVI07G02050,VITVI09G00186,VITVI10G00049,VITVI13G04751,VITVI14G01224,VITVI15G00492,VITVI16G01391,VITVI16G01413,VITVI17G00263,VITVI17G01403,VITVI17G00411,VITVI18G01133,VITVI19G00569
GO:MF	oxidoreductase activity, acting on a sulfur group of donors	GO:0016667	0.000758999	3.11976	105	1573	16	35134	VITVI01G00133,VITVI04G01390,VITVI05G00342,VITVI06G00230,VITVI07G00255,VITVI08G01455,VITVI08G01932,VITVI09G00521,VITVI10G01458,VITVI12G00453,VITVI13G01342,VITVI14G00840,VITVI16G00311,VITVI17G00188,VITVI17G00974,VITVI18G01629
GO:MF	pyrophosphatase activity	GO:0016462	0.000785744	3.10472	863	1573	66	35134	VITVI01G00137,VITVI01G00333,VITVI01G00390,VITVI01G00594,VITVI02G00082,VITVI02G00187,VITVI02G00327,VITVI02G00340,VITVI02G00445,VITVI03G00348,VITVI03G00777,VITVI04G04112,VITVI04G01307,VITVI04G01014,VITVI04G01575,VITVI04G01743,VITVI05G00335,VITVI05G01784,VITVI06G00051,VITVI06G01847,VITVI06G01288,VITVI07G02301,VITVI07G01838,VITVI07G00186,VITVI07G02050,VITVI07G01504,VITVI08G01467,VITVI08G00177,VITVI08…
GO:MF	guanyl nucleotide binding	GO:0019001	0.000871302	3.05983	337	1573	33	35134	VITVI07G04656,VITVI02G00327,VITVI02G00340,VITVI03G00348,VITVI04G00339,VITVI04G04112,VITVI04G01743,VITVI05G00335,VITVI05G01784,VITVI06G00051,VITVI06G00107,VITVI06G01847,VITVI07G00355,VITVI07G00831,VITVI07G01838,VITVI07G00186,VITVI07G01504,VITVI08G01467,VITVI08G00177,VITVI08G00961,VITVI09G01598,VITVI09G00513,VITVI10G00619,VITVI10G01005,VITVI11G00363,VITVI11G00595,VITVI12G02057,VITVI14G00901,VITVI17…
GO:MF	guanyl ribonucleotide binding	GO:0032561	0.000871302	3.05983	337	1573	33	35134	VITVI07G04656,VITVI02G00327,VITVI02G00340,VITVI03G00348,VITVI04G00339,VITVI04G04112,VITVI04G01743,VITVI05G00335,VITVI05G01784,VITVI06G00051,VITVI06G00107,VITVI06G01847,VITVI07G00355,VITVI07G00831,VITVI07G01838,VITVI07G00186,VITVI07G01504,VITVI08G01467,VITVI08G00177,VITVI08G00961,VITVI09G01598,VITVI09G00513,VITVI10G00619,VITVI10G01005,VITVI11G00363,VITVI11G00595,VITVI12G02057,VITVI14G00901,VITVI17…
GO:MF	GTPase activity	GO:0003924	0.000871302	3.05983	249	1573	27	35134	VITVI02G00327,VITVI02G00340,VITVI03G00348,VITVI04G04112,VITVI04G01743,VITVI05G00335,VITVI05G01784,VITVI06G00051,VITVI06G01847,VITVI07G01838,VITVI07G00186,VITVI07G01504,VITVI08G01467,VITVI08G00177,VITVI08G00961,VITVI09G01598,VITVI09G00513,VITVI10G00619,VITVI10G01005,VITVI11G00363,VITVI11G00595,VITVI12G02057,VITVI14G00901,VITVI18G00367,VITVI18G00590,VITVI18G00655,VITVI18G00099
GO:MF	GTP binding	GO:0005525	0.000871302	3.05983	337	1573	33	35134	VITVI07G04656,VITVI02G00327,VITVI02G00340,VITVI03G00348,VITVI04G00339,VITVI04G04112,VITVI04G01743,VITVI05G00335,VITVI05G01784,VITVI06G00051,VITVI06G00107,VITVI06G01847,VITVI07G00355,VITVI07G00831,VITVI07G01838,VITVI07G00186,VITVI07G01504,VITVI08G01467,VITVI08G00177,VITVI08G00961,VITVI09G01598,VITVI09G00513,VITVI10G00619,VITVI10G01005,VITVI11G00363,VITVI11G00595,VITVI12G02057,VITVI14G00901,VITVI17…
GO:MF	hydrolase activity, acting on acid anhydrides, in phosphorus-containing anhydrides	GO:0016818	0.000895534	3.04792	872	1573	66	35134	VITVI01G00137,VITVI01G00333,VITVI01G00390,VITVI01G00594,VITVI02G00082,VITVI02G00187,VITVI02G00327,VITVI02G00340,VITVI02G00445,VITVI03G00348,VITVI03G00777,VITVI04G04112,VITVI04G01307,VITVI04G01014,VITVI04G01575,VITVI04G01743,VITVI05G00335,VITVI05G01784,VITVI06G00051,VITVI06G01847,VITVI06G01288,VITVI07G02301,VITVI07G01838,VITVI07G00186,VITVI07G02050,VITVI07G01504,VITVI08G01467,VITVI08G00177,VITVI08…
GO:MF	purine ribonucleoside triphosphate binding	GO:0035639	0.00124331	2.90542	3364	1573	198	35134	VITVI07G04656,VITVI10G00417,VITVI00G04504,VITVI00G04505,VITVI07G04646,VITVI01G01565,VITVI01G00133,VITVI01G00137,VITVI01G00355,VITVI01G00390,VITVI01G00526,VITVI01G00823,VITVI01G00594,VITVI01G01758,VITVI02G00023,VITVI02G00082,VITVI02G00187,VITVI02G00308,VITVI02G00318,VITVI02G00320,VITVI02G00327,VITVI02G00340,VITVI02G00389,VITVI02G01204,VITVI02G00483,VITVI03G00221,VITVI03G00452,VITVI03G00447,VITVI03…
GO:MF	catalytic activity, acting on RNA	GO:0140098	0.00159493	2.79726	636	1573	51	35134	VITVI07G01405,VITVI10G04126,VITVI01G01565,VITVI01G00823,VITVI01G04213,VITVI02G00318,VITVI02G00341,VITVI02G00389,VITVI04G01592,VITVI05G00278,VITVI06G00086,VITVI06G01070,VITVI07G01891,VITVI07G01619,VITVI08G01393,VITVI08G01871,VITVI09G00157,VITVI09G00224,VITVI10G00055,VITVI11G00095,VITVI11G00152,VITVI11G00316,VITVI12G00115,VITVI12G00317,VITVI12G01620,VITVI12G00367,VITVI12G00465,VITVI13G00286,VITVI13…
GO:MF	ATPase binding	GO:0051117	0.00200774	2.69729	17	1573	6	35134	VITVI13G04636,VITVI01G00166,VITVI03G00356,VITVI06G00348,VITVI07G00422,VITVI14G01006
GO:MF	disulfide oxidoreductase activity	GO:0015036	0.00261802	2.58203	62	1573	11	35134	VITVI04G01390,VITVI05G00342,VITVI07G00255,VITVI08G01455,VITVI09G00521,VITVI10G01458,VITVI12G00453,VITVI13G01342,VITVI14G00840,VITVI17G00188,VITVI18G01629
GO:MF	serine-type peptidase activity	GO:0008236	0.0029591	2.52884	287	1573	28	35134	VITVI13G04636,VITVI01G00166,VITVI02G00422,VITVI03G01575,VITVI03G00356,VITVI03G00708,VITVI03G01621,VITVI05G00278,VITVI06G01362,VITVI07G00414,VITVI07G00422,VITVI07G00612,VITVI09G01502,VITVI11G00327,VITVI11G00331,VITVI11G01134,VITVI11G04164,VITVI13G02008,VITVI13G00576,VITVI13G02067,VITVI14G01006,VITVI14G01228,VITVI14G01390,VITVI14G03060,VITVI15G00764,VITVI16G01344,VITVI18G00769,VITVI18G01162
GO:MF	serine hydrolase activity	GO:0017171	0.0029591	2.52884	287	1573	28	35134	VITVI13G04636,VITVI01G00166,VITVI02G00422,VITVI03G01575,VITVI03G00356,VITVI03G00708,VITVI03G01621,VITVI05G00278,VITVI06G01362,VITVI07G00414,VITVI07G00422,VITVI07G00612,VITVI09G01502,VITVI11G00327,VITVI11G00331,VITVI11G01134,VITVI11G04164,VITVI13G02008,VITVI13G00576,VITVI13G02067,VITVI14G01006,VITVI14G01228,VITVI14G01390,VITVI14G03060,VITVI15G00764,VITVI16G01344,VITVI18G00769,VITVI18G01162
GO:MF	protein-disulfide reductase activity	GO:0015035	0.00343985	2.46346	54	1573	10	35134	VITVI04G01390,VITVI05G00342,VITVI07G00255,VITVI08G01455,VITVI09G00521,VITVI10G01458,VITVI12G00453,VITVI13G01342,VITVI17G00188,VITVI18G01629
GO:MF	ATP-dependent peptidase activity	GO:0004176	0.00420846	2.37588	36	1573	8	35134	VITVI13G04636,VITVI01G00166,VITVI03G00356,VITVI07G00422,VITVI12G00141,VITVI14G01006,VITVI18G02496,VITVI19G01702
GO:MF	cyclosporin A binding	GO:0016018	0.00446348	2.35033	13	1573	5	35134	VITVI01G01705,VITVI03G04055,VITVI06G00643,VITVI07G00508,VITVI14G00560
GO:MF	ATP-dependent activity	GO:0140657	0.0064451	2.19077	1087	1573	74	35134	VITVI13G04636,VITVI01G01565,VITVI01G00137,VITVI01G00166,VITVI01G00333,VITVI01G00390,VITVI01G00823,VITVI01G00594,VITVI02G00082,VITVI02G00187,VITVI02G00320,VITVI02G00389,VITVI03G00447,VITVI03G00356,VITVI03G00777,VITVI04G01307,VITVI04G02109,VITVI04G01014,VITVI05G00237,VITVI05G00278,VITVI05G00849,VITVI06G00086,VITVI06G00160,VITVI06G00348,VITVI06G00510,VITVI06G01070,VITVI06G01288,VITVI06G01306,VITVI07…
GO:MF	nuclease activity	GO:0004518	0.00752243	2.12364	337	1573	30	35134	VITVI01G04213,VITVI02G00341,VITVI04G00189,VITVI04G01592,VITVI04G01692,VITVI05G00849,VITVI05G01592,VITVI06G01163,VITVI07G01891,VITVI07G00171,VITVI07G01619,VITVI08G01393,VITVI08G01829,VITVI10G00908,VITVI10G04308,VITVI11G01370,VITVI11G00316,VITVI12G00367,VITVI12G00465,VITVI13G01253,VITVI13G00975,VITVI14G01730,VITVI14G01895,VITVI15G00752,VITVI16G01007,VITVI17G00076,VITVI17G00132,VITVI17G01000,VITVI18…
GO:MF	cyclin binding	GO:0030332	0.00842126	2.07462	4	1573	3	35134	VITVI04G01364,VITVI08G00019,VITVI18G00040
GO:MF	hydrolase activity, acting on ester bonds	GO:0016788	0.00844936	2.07318	1100	1573	74	35134	VITVI07G04489,VITVI01G01956,VITVI01G04213,VITVI01G00634,VITVI02G00729,VITVI02G00341,VITVI03G00287,VITVI04G00189,VITVI04G00585,VITVI04G01592,VITVI04G01692,VITVI05G00260,VITVI05G00276,VITVI05G00849,VITVI05G00043,VITVI05G01592,VITVI05G01683,VITVI06G00533,VITVI06G00586,VITVI06G01839,VITVI06G01163,VITVI07G00355,VITVI07G01722,VITVI07G01891,VITVI07G00171,VITVI07G01619,VITVI08G01393,VITVI08G01488,VITVI08…
GO:MF	peptidyl-prolyl cis-trans isomerase activity	GO:0003755	0.0101211	1.99477	74	1573	11	35134	VITVI07G03105,VITVI01G01705,VITVI01G01779,VITVI03G04055,VITVI06G00643,VITVI07G00508,VITVI08G00941,VITVI14G00560,VITVI15G00574,VITVI19G01640,VITVI19G00569
GO:MF	structural constituent of cytoskeleton	GO:0005200	0.0108762	1.96352	42	1573	8	35134	VITVI07G04656,VITVI02G00327,VITVI02G00340,VITVI06G00051,VITVI06G01847,VITVI08G00961,VITVI10G01005,VITVI18G00590
GO:MF	serine-type endopeptidase activity	GO:0004252	0.0127906	1.89311	197	1573	20	35134	VITVI13G04636,VITVI01G00166,VITVI02G00422,VITVI03G01575,VITVI03G00356,VITVI05G00278,VITVI07G00414,VITVI07G00422,VITVI07G00612,VITVI09G01502,VITVI11G00327,VITVI11G00331,VITVI11G01134,VITVI13G02008,VITVI14G01006,VITVI14G01228,VITVI15G00764,VITVI16G01344,VITVI18G00769,VITVI18G01162
GO:MF	protein transmembrane transporter activity	GO:0008320	0.0161499	1.79183	35	1573	7	35134	VITVI01G00368,VITVI03G00848,VITVI06G00510,VITVI06G01401,VITVI08G00755,VITVI19G01702,VITVI19G00608
GO:MF	cis-trans isomerase activity	GO:0016859	0.0161499	1.79183	79	1573	11	35134	VITVI07G03105,VITVI01G01705,VITVI01G01779,VITVI03G04055,VITVI06G00643,VITVI07G00508,VITVI08G00941,VITVI14G00560,VITVI15G00574,VITVI19G01640,VITVI19G00569
GO:MF	protein transporter activity	GO:0140318	0.0161499	1.79183	35	1573	7	35134	VITVI01G00368,VITVI03G00848,VITVI06G00510,VITVI06G01401,VITVI08G00755,VITVI19G01702,VITVI19G00608
GO:MF	macromolecule transmembrane transporter activity	GO:0022884	0.0161499	1.79183	35	1573	7	35134	VITVI01G00368,VITVI03G00848,VITVI06G00510,VITVI06G01401,VITVI08G00755,VITVI19G01702,VITVI19G00608
GO:MF	rRNA primary transcript binding	GO:0042134	0.0163591	1.78624	5	1573	3	35134	VITVI07G01999,VITVI13G01540,VITVI14G00746
GO:MF	methylmalonate-semialdehyde dehydrogenase (acylating, NAD) activity	GO:0004491	0.0163591	1.78624	5	1573	3	35134	VITVI07G01405,VITVI03G00892,VITVI12G04066
GO:MF	metal ion binding	GO:0046872	0.0183821	1.7356	3964	1573	217	35134	VITVI07G01219,VITVI10G00252,VITVI15G04172,VITVI17G01311,VITVI00G04706,VITVI02G04136,VITVI01G01563,VITVI01G00031,VITVI01G00337,VITVI01G00355,VITVI01G00442,VITVI01G00482,VITVI01G00932,VITVI01G01020,VITVI01G01740,VITVI01G01762,VITVI01G01782,VITVI02G00618,VITVI02G00656,VITVI02G00691,VITVI02G00715,VITVI02G00276,VITVI02G00316,VITVI02G00341,VITVI02G00444,VITVI02G01100,VITVI02G01640,VITVI03G00043,VITVI03…
GO:MF	DNA nuclease activity	GO:0004536	0.0211447	1.6748	37	1573	7	35134	VITVI04G00189,VITVI04G01692,VITVI05G01592,VITVI06G01163,VITVI15G00752,VITVI16G01007,VITVI17G01000
GO:MF	cation binding	GO:0043169	0.0245324	1.61026	3990	1573	217	35134	VITVI07G01219,VITVI10G00252,VITVI15G04172,VITVI17G01311,VITVI00G04706,VITVI02G04136,VITVI01G01563,VITVI01G00031,VITVI01G00337,VITVI01G00355,VITVI01G00442,VITVI01G00482,VITVI01G00932,VITVI01G01020,VITVI01G01740,VITVI01G01762,VITVI01G01782,VITVI02G00618,VITVI02G00656,VITVI02G00691,VITVI02G00715,VITVI02G00276,VITVI02G00316,VITVI02G00341,VITVI02G00444,VITVI02G01100,VITVI02G01640,VITVI03G00043,VITVI03…
GO:MF	adenylyltransferase activity	GO:0070566	0.0282731	1.54863	29	1573	6	35134	VITVI01G00333,VITVI01G00355,VITVI05G01694,VITVI17G00270,VITVI18G01807,VITVI19G00551
GO:MF	crossover junction DNA endonuclease activity	GO:0008821	0.0288028	1.54057	6	1573	3	35134	VITVI06G01163,VITVI15G00752,VITVI16G01007
GO:MF	protein methyltransferase activity	GO:0008276	0.0294612	1.53075	62	1573	9	35134	VITVI05G04409,VITVI01G00086,VITVI07G02035,VITVI12G00746,VITVI13G01351,VITVI14G01590,VITVI16G01083,VITVI18G02965,VITVI19G01501
GO:MF	peptidase activity	GO:0008233	0.0311825	1.50609	834	1573	56	35134	VITVI07G01200,VITVI07G01205,VITVI07G02582,VITVI13G04636,VITVI01G00166,VITVI01G00603,VITVI02G00422,VITVI02G00547,VITVI03G00286,VITVI03G01575,VITVI03G00485,VITVI03G00356,VITVI03G00708,VITVI03G01621,VITVI04G04156,VITVI05G00278,VITVI05G00430,VITVI05G01082,VITVI06G00316,VITVI06G01362,VITVI07G00414,VITVI07G00422,VITVI07G00612,VITVI08G04286,VITVI08G00113,VITVI09G01502,VITVI10G00567,VITVI10G00591,VITVI11…
GO:MF	lysine N-methyltransferase activity	GO:0016278	0.0311825	1.50609	30	1573	6	35134	VITVI05G04409,VITVI01G00086,VITVI07G02035,VITVI12G00746,VITVI14G01590,VITVI18G02965
GO:MF	protein-lysine N-methyltransferase activity	GO:0016279	0.0311825	1.50609	30	1573	6	35134	VITVI05G04409,VITVI01G00086,VITVI07G02035,VITVI12G00746,VITVI14G01590,VITVI18G02965
GO:MF	endopeptidase activity	GO:0004175	0.0377254	1.42337	520	1573	38	35134	VITVI07G01205,VITVI13G04636,VITVI01G00166,VITVI01G00603,VITVI02G00422,VITVI02G00547,VITVI03G00286,VITVI03G01575,VITVI03G00485,VITVI03G00356,VITVI04G04156,VITVI05G00278,VITVI05G00430,VITVI06G00316,VITVI07G00414,VITVI07G00422,VITVI07G00612,VITVI08G04286,VITVI08G00113,VITVI09G01502,VITVI10G00567,VITVI10G00591,VITVI11G00327,VITVI11G00331,VITVI11G01134,VITVI12G00141,VITVI13G02008,VITVI14G01006,VITVI14…
GO:MF	ion binding	GO:0043167	0.0377918	1.4226	8296	1573	419	35134	VITVI07G01219,VITVI10G00252,VITVI15G04172,VITVI17G01311,VITVI07G04656,VITVI10G00417,VITVI00G04504,VITVI00G04505,VITVI00G04706,VITVI02G04136,VITVI07G04646,VITVI01G01563,VITVI01G01565,VITVI01G00031,VITVI01G00133,VITVI01G00137,VITVI01G00337,VITVI01G00355,VITVI01G00390,VITVI01G00442,VITVI01G00482,VITVI01G00526,VITVI01G00816,VITVI01G00823,VITVI01G00932,VITVI01G01020,VITVI01G00594,VITVI01G01740,VITVI01…
GO:MF	DNA endonuclease activity, producing 3'-phosphomonoesters	GO:0016889	0.0419803	1.37695	7	1573	3	35134	VITVI06G01163,VITVI15G00752,VITVI16G01007
GO:MF	phosphatidic acid binding	GO:0070300	0.0419803	1.37695	7	1573	3	35134	VITVI05G00260,VITVI15G00458,VITVI17G00872
GO:MF	helicase activity	GO:0004386	0.0419803	1.37695	193	1573	18	35134	VITVI01G01565,VITVI01G00823,VITVI02G00389,VITVI05G00278,VITVI06G00086,VITVI06G01070,VITVI11G00152,VITVI12G00003,VITVI13G00111,VITVI13G01841,VITVI15G04674,VITVI14G01436,VITVI14G01940,VITVI15G00993,VITVI17G00262,VITVI17G00388,VITVI18G01543,VITVI19G00675
GO:MF	DNA topoisomerase activity	GO:0003916	0.0462445	1.33494	23	1573	5	35134	VITVI04G00261,VITVI05G01320,VITVI06G00160,VITVI12G04607,VITVI12G00353
GO:BP	biological_process	GO:0008150	8.04656e-44	43.0944	18606	1573	1107	35134	VITVI07G01200,VITVI07G01205,VITVI07G00081,VITVI10G00358,VITVI10G00209,VITVI10G04078,VITVI10G01666,VITVI07G02582,VITVI13G04636,VITVI07G04489,VITVI07G01405,VITVI07G01247,VITVI07G01219,VITVI07G04463,VITVI02G00565,VITVI08G02419,VITVI15G04172,VITVI17G01311,VITVI17G00004,VITVI04G04411,VITVI07G01437,VITVI02G00499,VITVI07G01137,VITVI07G02992,VITVI07G04656,VITVI10G04226,VITVI10G00387,VITVI05G04409,VITVI10…
GO:BP	cellular process	GO:0009987	2.79979e-40	39.5529	14813	1573	929	35134	VITVI07G00081,VITVI10G00358,VITVI10G01666,VITVI07G02582,VITVI07G04489,VITVI07G01405,VITVI07G01247,VITVI07G01219,VITVI07G04463,VITVI08G02419,VITVI17G01311,VITVI17G00004,VITVI04G04411,VITVI07G01137,VITVI07G02992,VITVI07G04656,VITVI10G00387,VITVI05G04409,VITVI10G00417,VITVI04G01545,VITVI00G04504,VITVI00G04505,VITVI07G04669,VITVI07G02548,VITVI04G02288,VITVI00G04706,VITVI10G04126,VITVI13G04616,VITVI07…
GO:BP	metabolic process	GO:0008152	3.04081e-37	36.517	13524	1573	859	35134	VITVI07G01200,VITVI07G01205,VITVI10G00209,VITVI10G04078,VITVI10G01666,VITVI07G02582,VITVI13G04636,VITVI07G01405,VITVI07G01247,VITVI07G01219,VITVI02G00565,VITVI15G04172,VITVI17G01311,VITVI17G00004,VITVI04G04411,VITVI07G01437,VITVI07G01137,VITVI10G04226,VITVI10G00387,VITVI05G04409,VITVI10G00417,VITVI15G04503,VITVI04G01545,VITVI07G03105,VITVI00G04504,VITVI00G04505,VITVI07G04669,VITVI07G02548,VITVI04…
GO:BP	organic substance metabolic process	GO:0071704	1.803e-36	35.744	12549	1573	810	35134	VITVI07G01200,VITVI07G01205,VITVI10G00209,VITVI10G04078,VITVI07G02582,VITVI13G04636,VITVI07G01405,VITVI07G01247,VITVI07G01219,VITVI02G00565,VITVI15G04172,VITVI17G01311,VITVI17G00004,VITVI04G04411,VITVI07G01437,VITVI07G01137,VITVI10G04226,VITVI10G00387,VITVI05G04409,VITVI10G00417,VITVI15G04503,VITVI04G01545,VITVI07G03105,VITVI00G04504,VITVI00G04505,VITVI07G04669,VITVI07G02548,VITVI04G02288,VITVI00…
GO:BP	organic substance biosynthetic process	GO:1901576	6.34924e-33	32.1973	6177	1573	473	35134	VITVI07G02582,VITVI07G01405,VITVI07G01247,VITVI17G01311,VITVI04G04411,VITVI07G01137,VITVI10G00387,VITVI04G01545,VITVI07G04669,VITVI07G02548,VITVI04G02288,VITVI10G04126,VITVI13G04616,VITVI07G04646,VITVI01G01372,VITVI01G01565,VITVI01G02258,VITVI01G04442,VITVI01G00006,VITVI01G00025,VITVI01G00086,VITVI01G00137,VITVI01G00150,VITVI01G00156,VITVI01G00333,VITVI01G00355,VITVI01G04125,VITVI01G00545,VITVI01…
GO:BP	biosynthetic process	GO:0009058	1.44861e-31	30.839	6350	1573	478	35134	VITVI07G02582,VITVI07G01405,VITVI07G01247,VITVI17G01311,VITVI04G04411,VITVI07G01137,VITVI10G00387,VITVI04G01545,VITVI07G04669,VITVI07G02548,VITVI04G02288,VITVI10G04126,VITVI13G04616,VITVI07G04646,VITVI01G01372,VITVI01G01565,VITVI01G02258,VITVI01G04442,VITVI01G00006,VITVI01G00025,VITVI01G00086,VITVI01G00137,VITVI01G00150,VITVI01G00156,VITVI01G00333,VITVI01G00355,VITVI01G04125,VITVI01G00545,VITVI01…
GO:BP	nitrogen compound metabolic process	GO:0006807	4.01299e-31	30.3965	10133	1573	673	35134	VITVI07G01200,VITVI07G01205,VITVI10G00209,VITVI07G02582,VITVI13G04636,VITVI07G01405,VITVI07G01247,VITVI07G01219,VITVI15G04172,VITVI17G01311,VITVI17G00004,VITVI04G04411,VITVI07G01137,VITVI10G04226,VITVI10G00387,VITVI05G04409,VITVI10G00417,VITVI15G04503,VITVI04G01545,VITVI07G03105,VITVI00G04504,VITVI00G04505,VITVI07G04669,VITVI07G02548,VITVI04G02288,VITVI00G04706,VITVI10G04126,VITVI13G04616,VITVI02…
GO:BP	primary metabolic process	GO:0044238	4.10573e-31	30.3866	11731	1573	751	35134	VITVI07G01200,VITVI07G01205,VITVI10G00209,VITVI10G04078,VITVI07G02582,VITVI13G04636,VITVI07G01405,VITVI07G01247,VITVI07G01219,VITVI02G00565,VITVI15G04172,VITVI17G01311,VITVI17G00004,VITVI04G04411,VITVI07G01437,VITVI07G01137,VITVI10G04226,VITVI10G00387,VITVI05G04409,VITVI10G00417,VITVI15G04503,VITVI04G01545,VITVI07G03105,VITVI00G04504,VITVI00G04505,VITVI07G04669,VITVI07G02548,VITVI04G02288,VITVI00…
GO:BP	cellular biosynthetic process	GO:0044249	1.87428e-30	29.7272	6060	1573	458	35134	VITVI07G02582,VITVI07G01405,VITVI07G01247,VITVI17G01311,VITVI04G04411,VITVI07G01137,VITVI10G00387,VITVI04G01545,VITVI07G04669,VITVI07G02548,VITVI04G02288,VITVI10G04126,VITVI13G04616,VITVI01G01372,VITVI01G01565,VITVI01G02258,VITVI01G04442,VITVI01G00006,VITVI01G00025,VITVI01G00086,VITVI01G00137,VITVI01G00150,VITVI01G00156,VITVI01G00333,VITVI01G00355,VITVI01G04125,VITVI01G00545,VITVI01G00934,VITVI01…
GO:BP	cellular component organization or biogenesis	GO:0071840	2.15212e-30	29.6671	2491	1573	246	35134	VITVI08G02419,VITVI17G00004,VITVI07G04656,VITVI10G00387,VITVI05G04409,VITVI04G01545,VITVI01G01457,VITVI01G01620,VITVI01G00006,VITVI01G00025,VITVI01G00086,VITVI01G04125,VITVI01G00543,VITVI01G00590,VITVI01G00599,VITVI01G00628,VITVI02G00735,VITVI02G00842,VITVI02G00274,VITVI02G00327,VITVI02G00340,VITVI02G00341,VITVI02G00975,VITVI02G01098,VITVI02G01173,VITVI03G00089,VITVI03G00235,VITVI03G00512,VITVI03…
GO:BP	cellular nitrogen compound metabolic process	GO:0034641	4.47946e-30	29.3488	5978	1573	452	35134	VITVI07G02582,VITVI07G01405,VITVI07G01219,VITVI07G01137,VITVI10G00387,VITVI04G01545,VITVI07G02548,VITVI04G02288,VITVI00G04706,VITVI10G04126,VITVI01G01565,VITVI01G02258,VITVI01G00006,VITVI01G00025,VITVI01G00079,VITVI01G00086,VITVI01G00132,VITVI01G00150,VITVI01G00156,VITVI01G00333,VITVI01G00355,VITVI01G04125,VITVI01G00545,VITVI01G00934,VITVI01G01020,VITVI01G02047,VITVI01G02053,VITVI01G00634,VITVI01…
GO:BP	cellular metabolic process	GO:0044237	7.53584e-30	29.1229	10831	1573	702	35134	VITVI10G01666,VITVI07G02582,VITVI07G01405,VITVI07G01247,VITVI07G01219,VITVI17G01311,VITVI17G00004,VITVI04G04411,VITVI07G01137,VITVI10G00387,VITVI10G00417,VITVI04G01545,VITVI00G04504,VITVI00G04505,VITVI07G04669,VITVI07G02548,VITVI04G02288,VITVI00G04706,VITVI10G04126,VITVI13G04616,VITVI07G04646,VITVI01G01372,VITVI01G01565,VITVI01G02258,VITVI01G04442,VITVI01G00006,VITVI01G00025,VITVI01G00079,VITVI01…
GO:BP	RNA processing	GO:0006396	6.01932e-29	28.2205	879	1573	126	35134	VITVI07G01405,VITVI10G00387,VITVI04G01545,VITVI10G04126,VITVI01G00006,VITVI01G00150,VITVI01G00156,VITVI01G00355,VITVI01G04125,VITVI01G01020,VITVI01G02047,VITVI01G02053,VITVI02G00656,VITVI02G00007,VITVI02G00341,VITVI04G00134,VITVI04G00152,VITVI04G01192,VITVI04G02028,VITVI05G00335,VITVI05G00455,VITVI05G00639,VITVI05G00799,VITVI05G00836,VITVI05G01254,VITVI05G00147,VITVI05G00125,VITVI05G00049,VITVI05…
GO:BP	macromolecule biosynthetic process	GO:0009059	1.52295e-28	27.8173	4838	1573	383	35134	VITVI07G02582,VITVI07G01405,VITVI17G01311,VITVI04G04411,VITVI07G01137,VITVI10G00387,VITVI04G01545,VITVI07G02548,VITVI10G04126,VITVI01G01372,VITVI01G02258,VITVI01G04442,VITVI01G00006,VITVI01G00025,VITVI01G00086,VITVI01G00137,VITVI01G00150,VITVI01G00156,VITVI01G00355,VITVI01G04125,VITVI01G00545,VITVI01G00934,VITVI01G01020,VITVI01G02047,VITVI01G02053,VITVI01G00594,VITVI01G00613,VITVI01G00628,VITVI01…
GO:BP	gene expression	GO:0010467	2.03798e-28	27.6908	4257	1573	349	35134	VITVI07G02582,VITVI07G01405,VITVI17G01311,VITVI07G01137,VITVI10G00387,VITVI04G01545,VITVI07G02548,VITVI10G04126,VITVI01G02258,VITVI01G00006,VITVI01G00025,VITVI01G00086,VITVI01G00137,VITVI01G00150,VITVI01G00156,VITVI01G00355,VITVI01G04125,VITVI01G00545,VITVI01G00934,VITVI01G01020,VITVI01G02047,VITVI01G02053,VITVI01G00594,VITVI01G00613,VITVI01G00634,VITVI01G01705,VITVI02G00645,VITVI02G00656,VITVI02…
GO:BP	macromolecule metabolic process	GO:0043170	2.51633e-28	27.5992	9741	1573	642	35134	VITVI07G01200,VITVI07G01205,VITVI10G00209,VITVI07G02582,VITVI13G04636,VITVI07G01405,VITVI07G01219,VITVI15G04172,VITVI17G01311,VITVI17G00004,VITVI04G04411,VITVI07G01137,VITVI10G04226,VITVI10G00387,VITVI05G04409,VITVI10G00417,VITVI15G04503,VITVI04G01545,VITVI07G03105,VITVI00G04504,VITVI00G04505,VITVI07G02548,VITVI04G02288,VITVI00G04706,VITVI10G04126,VITVI01G01372,VITVI01G01565,VITVI01G01576,VITVI01…
GO:BP	ribonucleoprotein complex biogenesis	GO:0022613	2.78877e-23	22.5546	474	1573	81	35134	VITVI10G00387,VITVI04G01545,VITVI01G00006,VITVI01G04125,VITVI01G00599,VITVI02G00735,VITVI02G00341,VITVI03G00089,VITVI04G00134,VITVI04G04112,VITVI04G01192,VITVI04G01743,VITVI05G00335,VITVI05G00455,VITVI05G01254,VITVI05G01701,VITVI06G00107,VITVI06G01070,VITVI06G01406,VITVI06G04445,VITVI07G00312,VITVI07G00323,VITVI07G01999,VITVI07G00145,VITVI07G00171,VITVI07G00195,VITVI07G00226,VITVI07G00234,VITVI07…
GO:BP	ribosome biogenesis	GO:0042254	3.43554e-22	21.464	387	1573	71	35134	VITVI04G01545,VITVI01G00006,VITVI01G00599,VITVI02G00735,VITVI02G00341,VITVI03G00089,VITVI04G00134,VITVI04G04112,VITVI04G01192,VITVI04G01743,VITVI05G00335,VITVI05G00455,VITVI05G01254,VITVI05G01701,VITVI06G00107,VITVI06G01070,VITVI06G01406,VITVI06G04445,VITVI07G00312,VITVI07G00323,VITVI07G01999,VITVI07G00171,VITVI07G00195,VITVI07G00226,VITVI07G01619,VITVI07G01162,VITVI07G00025,VITVI08G02190,VITVI08…
GO:BP	heterocycle metabolic process	GO:0046483	1.54825e-21	20.8102	5500	1573	396	35134	VITVI07G01405,VITVI07G01219,VITVI07G01137,VITVI10G00387,VITVI04G01545,VITVI04G02288,VITVI00G04706,VITVI10G04126,VITVI01G01565,VITVI01G00006,VITVI01G00025,VITVI01G00079,VITVI01G00086,VITVI01G00132,VITVI01G00150,VITVI01G00156,VITVI01G00333,VITVI01G00355,VITVI01G04125,VITVI01G00545,VITVI01G00934,VITVI01G01020,VITVI01G02047,VITVI01G02053,VITVI01G01740,VITVI01G01779,VITVI02G00656,VITVI02G00673,VITVI02…
GO:BP	organic cyclic compound metabolic process	GO:1901360	4.07193e-21	20.3902	5789	1573	410	35134	VITVI07G01405,VITVI07G01219,VITVI07G01137,VITVI10G00387,VITVI04G01545,VITVI04G02288,VITVI00G04706,VITVI10G04126,VITVI13G04616,VITVI01G01565,VITVI01G00006,VITVI01G00025,VITVI01G00079,VITVI01G00086,VITVI01G00132,VITVI01G00150,VITVI01G00156,VITVI01G00333,VITVI01G00355,VITVI01G04125,VITVI01G00545,VITVI01G00934,VITVI01G01020,VITVI01G02047,VITVI01G02053,VITVI01G01740,VITVI01G01779,VITVI01G01782,VITVI02…
GO:BP	cellular aromatic compound metabolic process	GO:0006725	7.09481e-20	19.1491	5710	1573	401	35134	VITVI07G01405,VITVI07G01219,VITVI07G01137,VITVI10G00387,VITVI04G01545,VITVI04G02288,VITVI00G04706,VITVI10G04126,VITVI13G04616,VITVI01G01565,VITVI01G00006,VITVI01G00025,VITVI01G00079,VITVI01G00086,VITVI01G00132,VITVI01G00150,VITVI01G00156,VITVI01G00333,VITVI01G00355,VITVI01G04125,VITVI01G00545,VITVI01G00934,VITVI01G01020,VITVI01G02047,VITVI01G02053,VITVI01G01740,VITVI01G01779,VITVI02G00656,VITVI02…
GO:BP	ncRNA processing	GO:0034470	1.41286e-19	18.8499	440	1573	72	35134	VITVI04G01545,VITVI10G04126,VITVI01G00006,VITVI02G00341,VITVI04G00134,VITVI04G01192,VITVI05G00335,VITVI05G00455,VITVI05G01254,VITVI05G01701,VITVI06G00107,VITVI06G01070,VITVI06G04445,VITVI07G00323,VITVI07G01999,VITVI07G00171,VITVI07G00195,VITVI07G00226,VITVI07G01619,VITVI07G01162,VITVI08G02190,VITVI08G01588,VITVI08G01813,VITVI08G01027,VITVI09G00015,VITVI09G00224,VITVI09G00520,VITVI10G00908,VITVI11…
GO:BP	RNA metabolic process	GO:0016070	6.24748e-19	18.2043	3731	1573	288	35134	VITVI07G01405,VITVI07G01137,VITVI10G00387,VITVI04G01545,VITVI00G04706,VITVI10G04126,VITVI01G00006,VITVI01G00025,VITVI01G00079,VITVI01G00086,VITVI01G00150,VITVI01G00156,VITVI01G00355,VITVI01G04125,VITVI01G00545,VITVI01G00934,VITVI01G01020,VITVI01G02047,VITVI01G02053,VITVI01G01740,VITVI02G00656,VITVI02G00673,VITVI02G00715,VITVI02G00007,VITVI02G01314,VITVI02G00121,VITVI02G00286,VITVI02G00318,VITVI02…
GO:BP	cellular component biogenesis	GO:0044085	2.71096e-18	17.5669	1158	1573	126	35134	VITVI08G02419,VITVI17G00004,VITVI10G00387,VITVI04G01545,VITVI01G00006,VITVI01G04125,VITVI01G00599,VITVI01G00628,VITVI02G00735,VITVI02G00842,VITVI02G00341,VITVI03G00089,VITVI03G00447,VITVI03G00373,VITVI04G00134,VITVI04G04112,VITVI04G00465,VITVI04G01192,VITVI04G01432,VITVI04G01623,VITVI04G01743,VITVI05G00237,VITVI05G00335,VITVI05G00455,VITVI05G01254,VITVI05G01701,VITVI06G00107,VITVI06G00222,VITVI06…
GO:BP	cellular component organization	GO:0016043	4.00875e-18	17.397	2116	1573	189	35134	VITVI08G02419,VITVI17G00004,VITVI07G04656,VITVI10G00387,VITVI05G04409,VITVI01G01457,VITVI01G01620,VITVI01G00025,VITVI01G00086,VITVI01G04125,VITVI01G00543,VITVI01G00590,VITVI01G00599,VITVI01G00628,VITVI02G00842,VITVI02G00274,VITVI02G00327,VITVI02G00340,VITVI02G00975,VITVI02G01098,VITVI02G01173,VITVI03G00235,VITVI03G00512,VITVI03G00447,VITVI03G00373,VITVI03G01600,VITVI03G00848,VITVI04G00140,VITVI04…
GO:BP	nucleobase-containing compound metabolic process	GO:0006139	4.89953e-18	17.3098	5272	1573	370	35134	VITVI07G01405,VITVI07G01219,VITVI07G01137,VITVI10G00387,VITVI04G01545,VITVI00G04706,VITVI10G04126,VITVI01G01565,VITVI01G00006,VITVI01G00025,VITVI01G00079,VITVI01G00086,VITVI01G00132,VITVI01G00150,VITVI01G00156,VITVI01G00333,VITVI01G00355,VITVI01G04125,VITVI01G00545,VITVI01G00934,VITVI01G01020,VITVI01G02047,VITVI01G02053,VITVI01G01740,VITVI01G01779,VITVI02G00656,VITVI02G00673,VITVI02G00715,VITVI02…
GO:BP	rRNA metabolic process	GO:0016072	1.12903e-17	16.9473	283	1573	54	35134	VITVI04G01545,VITVI01G00006,VITVI02G00341,VITVI04G00134,VITVI04G01192,VITVI05G00335,VITVI05G00455,VITVI05G01254,VITVI05G01701,VITVI06G00107,VITVI06G01070,VITVI06G04445,VITVI07G00323,VITVI07G01999,VITVI07G00171,VITVI07G00195,VITVI07G00197,VITVI07G00226,VITVI07G01619,VITVI07G01162,VITVI08G02190,VITVI08G01588,VITVI08G01813,VITVI08G01027,VITVI09G00015,VITVI09G00157,VITVI09G00520,VITVI10G00908,VITVI11…
GO:BP	ncRNA metabolic process	GO:0034660	3.5333e-17	16.4518	569	1573	79	35134	VITVI04G01545,VITVI10G04126,VITVI01G00006,VITVI02G00318,VITVI02G00341,VITVI04G00134,VITVI04G01192,VITVI05G00335,VITVI05G00455,VITVI05G01254,VITVI05G01701,VITVI06G00107,VITVI06G01070,VITVI06G04445,VITVI07G00323,VITVI07G01999,VITVI07G00171,VITVI07G00195,VITVI07G00197,VITVI07G00226,VITVI07G01619,VITVI07G01162,VITVI08G02190,VITVI08G01588,VITVI08G01813,VITVI08G01027,VITVI09G00015,VITVI09G00157,VITVI09…
GO:BP	nucleic acid metabolic process	GO:0090304	1.06149e-16	15.9741	4928	1573	346	35134	VITVI07G01405,VITVI07G01219,VITVI07G01137,VITVI10G00387,VITVI04G01545,VITVI00G04706,VITVI10G04126,VITVI01G01565,VITVI01G00006,VITVI01G00025,VITVI01G00079,VITVI01G00086,VITVI01G00150,VITVI01G00156,VITVI01G00355,VITVI01G04125,VITVI01G00545,VITVI01G00934,VITVI01G01020,VITVI01G02047,VITVI01G02053,VITVI01G01740,VITVI02G00656,VITVI02G00673,VITVI02G00715,VITVI02G00007,VITVI02G01314,VITVI02G00121,VITVI02…
GO:BP	rRNA processing	GO:0006364	2.28092e-16	15.6419	272	1573	51	35134	VITVI04G01545,VITVI01G00006,VITVI02G00341,VITVI04G00134,VITVI04G01192,VITVI05G00335,VITVI05G00455,VITVI05G01254,VITVI05G01701,VITVI06G00107,VITVI06G01070,VITVI06G04445,VITVI07G00323,VITVI07G01999,VITVI07G00171,VITVI07G00195,VITVI07G00226,VITVI07G01619,VITVI07G01162,VITVI08G02190,VITVI08G01588,VITVI08G01813,VITVI08G01027,VITVI09G00015,VITVI09G00520,VITVI10G00908,VITVI11G00452,VITVI12G00164,VITVI12…
GO:BP	organelle organization	GO:0006996	6.3373e-14	13.1981	1168	1573	116	35134	VITVI17G00004,VITVI07G04656,VITVI01G01457,VITVI01G01620,VITVI01G00025,VITVI01G00086,VITVI01G00543,VITVI01G00590,VITVI01G00599,VITVI02G00274,VITVI02G00327,VITVI02G00340,VITVI02G00975,VITVI02G01098,VITVI02G01173,VITVI03G00512,VITVI03G00447,VITVI03G00848,VITVI04G00242,VITVI04G00261,VITVI04G00414,VITVI04G00595,VITVI04G01183,VITVI04G01195,VITVI04G01307,VITVI04G01432,VITVI04G01623,VITVI04G01743,VITVI04…
GO:BP	organonitrogen compound biosynthetic process	GO:1901566	1.37565e-13	12.8615	1565	1573	141	35134	VITVI07G02582,VITVI07G01247,VITVI04G04411,VITVI07G04669,VITVI07G02548,VITVI04G02288,VITVI13G04616,VITVI01G01372,VITVI01G02258,VITVI01G04442,VITVI01G00333,VITVI01G00634,VITVI01G01758,VITVI02G01321,VITVI02G00194,VITVI02G00249,VITVI02G00318,VITVI03G01190,VITVI03G01309,VITVI03G00287,VITVI03G00447,VITVI03G00368,VITVI04G00064,VITVI04G00110,VITVI04G00149,VITVI04G01183,VITVI04G01231,VITVI04G02132,VITVI04…
GO:BP	RNA modification	GO:0009451	2.27164e-12	11.6437	734	1573	82	35134	VITVI07G01405,VITVI00G04706,VITVI10G04126,VITVI01G00079,VITVI01G01020,VITVI01G01740,VITVI02G01314,VITVI02G04409,VITVI03G00511,VITVI03G00495,VITVI03G00777,VITVI04G00134,VITVI04G00447,VITVI05G00513,VITVI05G02077,VITVI05G00799,VITVI05G00049,VITVI06G00314,VITVI06G00774,VITVI06G01263,VITVI06G04438,VITVI07G00652,VITVI07G01816,VITVI07G01646,VITVI07G01159,VITVI08G02190,VITVI08G01443,VITVI08G01813,VITVI08…
GO:BP	organonitrogen compound metabolic process	GO:1901564	2.43518e-11	10.6135	5778	1573	367	35134	VITVI07G01200,VITVI07G01205,VITVI10G00209,VITVI07G02582,VITVI13G04636,VITVI07G01405,VITVI07G01247,VITVI15G04172,VITVI17G01311,VITVI17G00004,VITVI04G04411,VITVI10G04226,VITVI05G04409,VITVI10G00417,VITVI15G04503,VITVI07G03105,VITVI00G04504,VITVI00G04505,VITVI07G04669,VITVI07G02548,VITVI04G02288,VITVI13G04616,VITVI02G04136,VITVI01G01372,VITVI01G01563,VITVI01G01576,VITVI01G02258,VITVI01G04442,VITVI01…
GO:BP	translation	GO:0006412	2.54478e-09	8.59435	781	1573	78	35134	VITVI07G02582,VITVI07G02548,VITVI01G02258,VITVI01G00634,VITVI02G01321,VITVI02G00194,VITVI02G00249,VITVI02G00318,VITVI03G01190,VITVI04G00064,VITVI04G00149,VITVI04G02132,VITVI04G01439,VITVI04G01743,VITVI05G00254,VITVI05G00455,VITVI05G01254,VITVI05G00157,VITVI05G00060,VITVI06G00503,VITVI06G00651,VITVI06G00696,VITVI06G01433,VITVI06G01491,VITVI06G04445,VITVI07G00323,VITVI07G04166,VITVI07G01838,VITVI07…
GO:BP	peptide biosynthetic process	GO:0043043	2.9745e-09	8.52659	784	1573	78	35134	VITVI07G02582,VITVI07G02548,VITVI01G02258,VITVI01G00634,VITVI02G01321,VITVI02G00194,VITVI02G00249,VITVI02G00318,VITVI03G01190,VITVI04G00064,VITVI04G00149,VITVI04G02132,VITVI04G01439,VITVI04G01743,VITVI05G00254,VITVI05G00455,VITVI05G01254,VITVI05G00157,VITVI05G00060,VITVI06G00503,VITVI06G00651,VITVI06G00696,VITVI06G01433,VITVI06G01491,VITVI06G04445,VITVI07G00323,VITVI07G04166,VITVI07G01838,VITVI07…
GO:BP	maturation of SSU-rRNA	GO:0030490	4.09626e-09	8.38761	46	1573	16	35134	VITVI01G00006,VITVI02G00341,VITVI04G01192,VITVI05G00455,VITVI05G01254,VITVI05G01701,VITVI06G04445,VITVI08G01588,VITVI09G00015,VITVI09G00520,VITVI11G00452,VITVI12G00264,VITVI13G00711,VITVI15G01001,VITVI18G00540,VITVI18G00099
GO:BP	peptide metabolic process	GO:0006518	4.37596e-09	8.35893	821	1573	80	35134	VITVI07G02582,VITVI07G02548,VITVI01G02258,VITVI01G00634,VITVI02G01321,VITVI02G00194,VITVI02G00249,VITVI02G00318,VITVI03G01190,VITVI04G00064,VITVI04G00149,VITVI04G02132,VITVI04G01439,VITVI04G01743,VITVI05G00254,VITVI05G00455,VITVI05G01254,VITVI05G00157,VITVI05G00060,VITVI06G00503,VITVI06G00651,VITVI06G00696,VITVI06G01433,VITVI06G01491,VITVI06G04445,VITVI07G00323,VITVI07G00612,VITVI07G04166,VITVI07…
GO:BP	plastid organization	GO:0009657	4.55251e-09	8.34175	147	1573	28	35134	VITVI01G01457,VITVI01G00025,VITVI01G00086,VITVI01G00590,VITVI02G00975,VITVI03G00512,VITVI04G01183,VITVI04G01195,VITVI05G00335,VITVI05G00977,VITVI05G01325,VITVI06G00107,VITVI06G00198,VITVI06G00346,VITVI06G00510,VITVI06G01401,VITVI08G01467,VITVI08G00113,VITVI10G01068,VITVI11G00327,VITVI12G00184,VITVI13G01342,VITVI15G04674,VITVI16G01398,VITVI17G00411,VITVI18G00655,VITVI18G00785,VITVI19G00621
GO:BP	ribosomal small subunit biogenesis	GO:0042274	5.18934e-09	8.28489	76	1573	20	35134	VITVI01G00006,VITVI02G00341,VITVI04G01192,VITVI05G00455,VITVI05G01254,VITVI05G01701,VITVI06G04445,VITVI07G00025,VITVI08G01588,VITVI09G00015,VITVI09G00520,VITVI11G00452,VITVI12G00264,VITVI13G00711,VITVI15G01001,VITVI16G01104,VITVI17G04155,VITVI17G00684,VITVI18G00540,VITVI18G00099
GO:BP	mRNA metabolic process	GO:0016071	8.51315e-09	8.06991	489	1573	56	35134	VITVI10G00387,VITVI01G00150,VITVI01G00156,VITVI01G00355,VITVI01G04125,VITVI01G02047,VITVI01G02053,VITVI02G00656,VITVI02G00007,VITVI04G00152,VITVI05G00639,VITVI05G00799,VITVI05G00147,VITVI05G00125,VITVI05G00049,VITVI05G01542,VITVI06G01555,VITVI07G00652,VITVI07G01878,VITVI07G01891,VITVI07G00145,VITVI07G00195,VITVI07G00234,VITVI08G02190,VITVI08G01393,VITVI08G02252,VITVI08G01511,VITVI08G01822,VITVI11…
GO:BP	chloroplast organization	GO:0009658	1.90999e-08	7.71897	117	1573	24	35134	VITVI01G01457,VITVI01G00025,VITVI01G00086,VITVI02G00975,VITVI03G00512,VITVI04G01183,VITVI05G00335,VITVI05G00977,VITVI05G01325,VITVI06G00107,VITVI06G00198,VITVI06G00346,VITVI06G00510,VITVI06G01401,VITVI08G01467,VITVI08G00113,VITVI10G01068,VITVI12G00184,VITVI15G04674,VITVI16G01398,VITVI17G00411,VITVI18G00655,VITVI18G00785,VITVI19G00621
GO:BP	amide biosynthetic process	GO:0043604	3.18307e-08	7.49715	843	1573	79	35134	VITVI07G02582,VITVI07G02548,VITVI01G02258,VITVI01G00634,VITVI02G01321,VITVI02G00194,VITVI02G00249,VITVI02G00318,VITVI03G01190,VITVI04G00064,VITVI04G00149,VITVI04G02132,VITVI04G01439,VITVI04G01743,VITVI05G00254,VITVI05G00455,VITVI05G01254,VITVI05G00157,VITVI05G00060,VITVI06G00503,VITVI06G00651,VITVI06G00696,VITVI06G01433,VITVI06G01491,VITVI06G04445,VITVI07G00323,VITVI07G04166,VITVI07G01838,VITVI07…
GO:BP	mRNA modification	GO:0016556	1.30492e-07	6.88442	30	1573	12	35134	VITVI05G00799,VITVI05G00049,VITVI07G00652,VITVI08G02190,VITVI12G01963,VITVI13G01253,VITVI13G00859,VITVI14G01673,VITVI18G00146,VITVI18G00920,VITVI19G00129,VITVI19G00376
GO:BP	pigment metabolic process	GO:0042440	1.71586e-07	6.76552	101	1573	21	35134	VITVI04G02288,VITVI03G01309,VITVI06G00084,VITVI06G00107,VITVI06G00272,VITVI06G01518,VITVI07G00520,VITVI07G01750,VITVI08G01932,VITVI09G00062,VITVI09G01304,VITVI12G00685,VITVI13G01959,VITVI15G00440,VITVI16G01099,VITVI17G00609,VITVI18G00261,VITVI18G00988,VITVI19G01838,VITVI19G00257,VITVI19G00767
GO:BP	amide metabolic process	GO:0043603	1.99596e-07	6.69985	942	1573	83	35134	VITVI07G02582,VITVI07G02548,VITVI01G01563,VITVI01G02258,VITVI01G00634,VITVI02G01321,VITVI02G00194,VITVI02G00249,VITVI02G00318,VITVI03G01190,VITVI04G00064,VITVI04G00149,VITVI04G02132,VITVI04G01439,VITVI04G01743,VITVI05G00254,VITVI05G00455,VITVI05G01254,VITVI05G00157,VITVI05G00060,VITVI06G00503,VITVI06G00574,VITVI06G00651,VITVI06G00696,VITVI06G01433,VITVI06G01491,VITVI06G04445,VITVI07G00323,VITVI07…
GO:BP	protein metabolic process	GO:0019538	2.97546e-07	6.52645	4830	1573	296	35134	VITVI07G01200,VITVI07G01205,VITVI10G00209,VITVI07G02582,VITVI13G04636,VITVI15G04172,VITVI17G01311,VITVI17G00004,VITVI04G04411,VITVI10G04226,VITVI05G04409,VITVI10G00417,VITVI15G04503,VITVI07G03105,VITVI00G04504,VITVI00G04505,VITVI07G02548,VITVI04G02288,VITVI01G01372,VITVI01G01576,VITVI01G02258,VITVI01G04442,VITVI01G00086,VITVI01G00137,VITVI01G00166,VITVI01G01902,VITVI01G00499,VITVI01G00526,VITVI01…
GO:BP	pigment biosynthetic process	GO:0046148	6.94302e-07	6.15845	81	1573	18	35134	VITVI04G02288,VITVI03G01309,VITVI06G00084,VITVI06G00107,VITVI06G00272,VITVI06G01518,VITVI07G00520,VITVI08G01932,VITVI09G00062,VITVI09G01304,VITVI15G00440,VITVI16G01099,VITVI17G00609,VITVI18G00261,VITVI18G00988,VITVI19G01838,VITVI19G00257,VITVI19G00767
GO:BP	ribosomal large subunit biogenesis	GO:0042273	8.09573e-07	6.09174	91	1573	19	35134	VITVI01G00599,VITVI02G00735,VITVI06G01406,VITVI07G00312,VITVI07G00323,VITVI07G01999,VITVI08G00177,VITVI11G00452,VITVI12G00164,VITVI12G01799,VITVI13G01669,VITVI13G00718,VITVI14G00746,VITVI14G01703,VITVI14G01405,VITVI15G01001,VITVI17G00388,VITVI17G00910,VITVI18G01543
GO:BP	mRNA processing	GO:0006397	8.82744e-07	6.05417	375	1573	43	35134	VITVI10G00387,VITVI01G00150,VITVI01G00156,VITVI01G00355,VITVI01G04125,VITVI01G02047,VITVI01G02053,VITVI02G00656,VITVI02G00007,VITVI04G00152,VITVI05G00639,VITVI05G00799,VITVI05G00147,VITVI05G00125,VITVI05G00049,VITVI05G01542,VITVI06G01555,VITVI07G00652,VITVI07G01878,VITVI07G01891,VITVI07G00145,VITVI07G00234,VITVI08G02252,VITVI08G01511,VITVI08G01822,VITVI11G00170,VITVI11G00452,VITVI11G01656,VITVI11…
GO:BP	cellular nitrogen compound biosynthetic process	GO:0044271	1.0695e-06	5.97082	3408	1573	219	35134	VITVI07G02582,VITVI07G01137,VITVI07G02548,VITVI04G02288,VITVI01G01565,VITVI01G02258,VITVI01G00025,VITVI01G00086,VITVI01G00333,VITVI01G00545,VITVI01G00934,VITVI01G00634,VITVI02G00673,VITVI02G00715,VITVI02G01321,VITVI02G00121,VITVI02G00194,VITVI02G00249,VITVI02G00286,VITVI02G00318,VITVI02G00444,VITVI03G01190,VITVI03G01309,VITVI03G01600,VITVI03G00599,VITVI04G00064,VITVI04G00140,VITVI04G00149,VITVI04…
GO:BP	mitochondrion organization	GO:0007005	1.54361e-06	5.81146	157	1573	25	35134	VITVI17G00004,VITVI02G00274,VITVI02G01098,VITVI02G01173,VITVI03G00848,VITVI04G01307,VITVI05G00849,VITVI06G00198,VITVI06G00510,VITVI07G00603,VITVI07G01797,VITVI08G01419,VITVI08G00070,VITVI09G00574,VITVI10G00528,VITVI12G00706,VITVI13G00036,VITVI13G00193,VITVI14G00131,VITVI14G01545,VITVI14G02991,VITVI16G00146,VITVI19G01702,VITVI19G01725,VITVI19G00608
GO:BP	maturation of SSU-rRNA from tricistronic rRNA transcript (SSU-rRNA, 5.8S rRNA, LSU-rRNA)	GO:0000462	3.22609e-06	5.49132	32	1573	11	35134	VITVI04G01192,VITVI05G00455,VITVI05G01254,VITVI06G04445,VITVI09G00015,VITVI09G00520,VITVI12G00264,VITVI13G00711,VITVI15G01001,VITVI18G00540,VITVI18G00099
GO:BP	porphyrin-containing compound biosynthetic process	GO:0006779	3.91507e-06	5.40726	47	1573	13	35134	VITVI04G02288,VITVI03G01309,VITVI06G00107,VITVI07G00520,VITVI08G01932,VITVI09G00062,VITVI09G01304,VITVI15G00440,VITVI17G00609,VITVI18G00261,VITVI19G01838,VITVI19G00257,VITVI19G00767
GO:BP	tetrapyrrole biosynthetic process	GO:0033014	6.59977e-06	5.18047	49	1573	13	35134	VITVI04G02288,VITVI03G01309,VITVI06G00107,VITVI07G00520,VITVI08G01932,VITVI09G00062,VITVI09G01304,VITVI15G00440,VITVI17G00609,VITVI18G00261,VITVI19G01838,VITVI19G00257,VITVI19G00767
GO:BP	maturation of 5.8S rRNA	GO:0000460	8.72146e-06	5.05941	35	1573	11	35134	VITVI04G01192,VITVI06G01070,VITVI07G01999,VITVI07G00195,VITVI09G00015,VITVI12G00367,VITVI14G00746,VITVI14G01703,VITVI14G01405,VITVI15G01001,VITVI17G00910
GO:BP	protein folding	GO:0006457	1.11977e-05	4.95087	301	1573	35	35134	VITVI17G01311,VITVI01G00137,VITVI01G00594,VITVI01G01705,VITVI02G00645,VITVI02G00187,VITVI03G04055,VITVI04G01198,VITVI04G01014,VITVI05G01545,VITVI06G00222,VITVI06G00284,VITVI06G00643,VITVI07G00394,VITVI07G00508,VITVI07G02050,VITVI08G00070,VITVI09G00186,VITVI10G00022,VITVI10G00049,VITVI12G00288,VITVI13G00602,VITVI13G04751,VITVI14G01224,VITVI14G00560,VITVI15G00492,VITVI16G01391,VITVI16G01413,VITVI17…
GO:BP	porphyrin-containing compound metabolic process	GO:0006778	1.22919e-05	4.91038	69	1573	15	35134	VITVI04G02288,VITVI03G01309,VITVI06G00107,VITVI07G00520,VITVI07G01750,VITVI08G01932,VITVI09G00062,VITVI09G01304,VITVI12G00685,VITVI15G00440,VITVI17G00609,VITVI18G00261,VITVI19G01838,VITVI19G00257,VITVI19G00767
GO:BP	mitochondrial RNA metabolic process	GO:0000959	1.32481e-05	4.87785	44	1573	12	35134	VITVI05G00799,VITVI05G00049,VITVI07G00652,VITVI09G00574,VITVI12G01963,VITVI13G00859,VITVI14G01730,VITVI14G01311,VITVI14G01940,VITVI17G00022,VITVI19G00129,VITVI19G00376
GO:BP	tetrapyrrole metabolic process	GO:0033013	1.44994e-05	4.83865	70	1573	15	35134	VITVI04G02288,VITVI03G01309,VITVI06G00107,VITVI07G00520,VITVI07G01750,VITVI08G01932,VITVI09G00062,VITVI09G01304,VITVI12G00685,VITVI15G00440,VITVI17G00609,VITVI18G00261,VITVI19G01838,VITVI19G00257,VITVI19G00767
GO:BP	RNA splicing	GO:0008380	1.84528e-05	4.73394	268	1573	32	35134	VITVI10G00387,VITVI01G04125,VITVI01G02047,VITVI01G02053,VITVI02G00656,VITVI02G00007,VITVI05G00639,VITVI05G00147,VITVI06G01555,VITVI07G01878,VITVI07G00145,VITVI07G00197,VITVI07G00234,VITVI08G02252,VITVI08G01822,VITVI09G00574,VITVI11G00170,VITVI11G00452,VITVI11G01656,VITVI11G00595,VITVI12G00003,VITVI13G01053,VITVI14G02588,VITVI14G00618,VITVI15G04674,VITVI14G02509,VITVI14G01827,VITVI15G01262,VITVI15…
GO:BP	protein maturation	GO:0051604	2.3813e-05	4.62319	396	1573	41	35134	VITVI17G01311,VITVI01G00137,VITVI01G00594,VITVI01G01705,VITVI02G00645,VITVI02G00187,VITVI03G04055,VITVI03G00485,VITVI04G01198,VITVI04G01014,VITVI05G01545,VITVI06G00222,VITVI06G00284,VITVI06G00643,VITVI07G00394,VITVI07G00508,VITVI07G00612,VITVI07G02050,VITVI08G01468,VITVI08G00070,VITVI09G00186,VITVI10G01564,VITVI10G00022,VITVI10G00049,VITVI11G00327,VITVI12G00288,VITVI13G00602,VITVI13G04751,VITVI14…
GO:BP	cellular response to stress	GO:0033554	3.05165e-05	4.51547	737	1573	63	35134	VITVI07G01219,VITVI17G01311,VITVI01G04442,VITVI01G00133,VITVI02G00729,VITVI02G00111,VITVI02G00187,VITVI02G00444,VITVI03G00389,VITVI03G00319,VITVI04G00189,VITVI04G01198,VITVI04G02109,VITVI04G01014,VITVI04G01611,VITVI04G01692,VITVI05G00396,VITVI05G00849,VITVI05G01545,VITVI06G00284,VITVI06G00314,VITVI06G00358,VITVI07G00337,VITVI07G00574,VITVI07G01797,VITVI07G01891,VITVI08G01932,VITVI08G01143,VITVI08…
GO:BP	cytidine to uridine editing	GO:0016554	3.26888e-05	4.4856	14	1573	7	35134	VITVI05G00799,VITVI05G00049,VITVI07G00652,VITVI12G01963,VITVI13G00859,VITVI19G00129,VITVI19G00370
GO:BP	sno(s)RNA processing	GO:0043144	4.91338e-05	4.30862	10	1573	6	35134	VITVI07G00195,VITVI08G02190,VITVI12G00367,VITVI15G00994,VITVI15G01025,VITVI16G01083
GO:BP	sno(s)RNA metabolic process	GO:0016074	4.91338e-05	4.30862	10	1573	6	35134	VITVI07G00195,VITVI08G02190,VITVI12G00367,VITVI15G00994,VITVI15G01025,VITVI16G01083
GO:BP	macromolecule localization	GO:0033036	5.35331e-05	4.27138	932	1573	74	35134	VITVI07G04463,VITVI08G02419,VITVI04G04411,VITVI07G02992,VITVI01G01372,VITVI01G01620,VITVI01G04442,VITVI01G00139,VITVI01G00368,VITVI01G04240,VITVI01G00590,VITVI01G00599,VITVI01G00613,VITVI02G00662,VITVI02G00007,VITVI02G00111,VITVI02G00274,VITVI02G01173,VITVI03G01411,VITVI03G00848,VITVI04G00125,VITVI04G00242,VITVI04G04112,VITVI04G01014,VITVI04G01571,VITVI05G00260,VITVI05G01255,VITVI05G01264,VITVI05…
GO:BP	establishment of protein localization	GO:0045184	5.63387e-05	4.24919	672	1573	58	35134	VITVI07G04463,VITVI04G04411,VITVI07G02992,VITVI01G01372,VITVI01G01620,VITVI01G04442,VITVI01G00368,VITVI01G04240,VITVI01G00590,VITVI01G00599,VITVI01G00613,VITVI02G00662,VITVI02G00007,VITVI02G00111,VITVI02G00274,VITVI02G01173,VITVI03G01411,VITVI03G00848,VITVI04G00125,VITVI04G00242,VITVI04G04112,VITVI04G01014,VITVI04G01571,VITVI05G01255,VITVI05G01264,VITVI06G00198,VITVI06G00510,VITVI06G01401,VITVI07…
GO:BP	protein localization	GO:0008104	6.28188e-05	4.20191	739	1573	62	35134	VITVI07G04463,VITVI04G04411,VITVI07G02992,VITVI01G01372,VITVI01G01620,VITVI01G04442,VITVI01G00139,VITVI01G00368,VITVI01G04240,VITVI01G00590,VITVI01G00599,VITVI01G00613,VITVI02G00662,VITVI02G00007,VITVI02G00111,VITVI02G00274,VITVI02G01173,VITVI03G01411,VITVI03G00848,VITVI04G00125,VITVI04G00242,VITVI04G04112,VITVI04G01014,VITVI04G01571,VITVI05G01255,VITVI05G01264,VITVI06G00198,VITVI06G00510,VITVI06…
GO:BP	cellular macromolecule localization	GO:0070727	7.06255e-05	4.15104	742	1573	62	35134	VITVI07G04463,VITVI04G04411,VITVI07G02992,VITVI01G01372,VITVI01G01620,VITVI01G04442,VITVI01G00139,VITVI01G00368,VITVI01G04240,VITVI01G00590,VITVI01G00599,VITVI01G00613,VITVI02G00662,VITVI02G00007,VITVI02G00111,VITVI02G00274,VITVI02G01173,VITVI03G01411,VITVI03G00848,VITVI04G00125,VITVI04G00242,VITVI04G04112,VITVI04G01014,VITVI04G01571,VITVI05G01255,VITVI05G01264,VITVI06G00198,VITVI06G00510,VITVI06…
GO:BP	macromolecule modification	GO:0043412	7.27109e-05	4.1384	3642	1573	220	35134	VITVI07G01200,VITVI07G01205,VITVI07G02582,VITVI07G01405,VITVI15G04172,VITVI17G00004,VITVI04G04411,VITVI10G04226,VITVI05G04409,VITVI10G00417,VITVI15G04503,VITVI07G03105,VITVI00G04504,VITVI00G04505,VITVI04G02288,VITVI00G04706,VITVI10G04126,VITVI01G01372,VITVI01G01576,VITVI01G04442,VITVI01G00079,VITVI01G00086,VITVI01G01902,VITVI01G00499,VITVI01G00526,VITVI01G01020,VITVI01G01705,VITVI01G01740,VITVI02…
GO:BP	cellular localization	GO:0051641	8.29334e-05	4.08127	979	1573	76	35134	VITVI07G04463,VITVI04G04411,VITVI07G02992,VITVI01G01372,VITVI01G01620,VITVI01G04442,VITVI01G00139,VITVI01G00368,VITVI01G04240,VITVI01G00590,VITVI01G00599,VITVI01G00613,VITVI02G00662,VITVI02G00007,VITVI02G00111,VITVI02G00274,VITVI02G01173,VITVI03G01411,VITVI03G00848,VITVI04G00125,VITVI04G00242,VITVI04G04112,VITVI04G00595,VITVI04G01014,VITVI04G01571,VITVI05G00260,VITVI05G00888,VITVI05G01255,VITVI05…
GO:BP	protein transport	GO:0015031	8.32696e-05	4.07951	666	1573	57	35134	VITVI07G04463,VITVI04G04411,VITVI07G02992,VITVI01G01372,VITVI01G01620,VITVI01G04442,VITVI01G00368,VITVI01G04240,VITVI01G00599,VITVI01G00613,VITVI02G00662,VITVI02G00007,VITVI02G00111,VITVI02G00274,VITVI02G01173,VITVI03G01411,VITVI03G00848,VITVI04G00125,VITVI04G00242,VITVI04G04112,VITVI04G01014,VITVI04G01571,VITVI05G01255,VITVI05G01264,VITVI06G00198,VITVI06G00510,VITVI06G01401,VITVI07G00603,VITVI07…
GO:BP	base conversion or substitution editing	GO:0016553	8.70627e-05	4.06017	16	1573	7	35134	VITVI05G00799,VITVI05G00049,VITVI07G00652,VITVI12G01963,VITVI13G00859,VITVI19G00129,VITVI19G00370
GO:BP	mitochondrial mRNA modification	GO:0080156	0.000140369	3.85273	17	1573	7	35134	VITVI05G00799,VITVI05G00049,VITVI07G00652,VITVI12G01963,VITVI13G00859,VITVI19G00129,VITVI19G00376
GO:BP	heme biosynthetic process	GO:0006783	0.000182374	3.73904	24	1573	8	35134	VITVI04G02288,VITVI03G01309,VITVI07G00520,VITVI09G01304,VITVI15G00440,VITVI18G00261,VITVI19G01838,VITVI19G00767
GO:BP	RNA 3'-end processing	GO:0031123	0.000182873	3.73785	76	1573	14	35134	VITVI01G00355,VITVI05G01542,VITVI07G00195,VITVI08G02190,VITVI08G01511,VITVI12G00367,VITVI12G00465,VITVI14G01730,VITVI14G01940,VITVI15G01025,VITVI16G01052,VITVI16G01083,VITVI17G00270,VITVI18G01807
GO:BP	cytoplasmic translation	GO:0002181	0.00019922	3.70067	87	1573	15	35134	VITVI01G02258,VITVI02G00249,VITVI04G01439,VITVI06G01433,VITVI07G01838,VITVI11G00152,VITVI11G00222,VITVI13G00522,VITVI13G00718,VITVI14G00159,VITVI14G01385,VITVI16G01711,VITVI16G01054,VITVI18G02360,VITVI19G01663
GO:BP	mitochondrial RNA modification	GO:1900864	0.000209517	3.67878	18	1573	7	35134	VITVI05G00799,VITVI05G00049,VITVI07G00652,VITVI12G01963,VITVI13G00859,VITVI19G00129,VITVI19G00376
GO:BP	response to light stimulus	GO:0009416	0.000209517	3.67878	248	1573	28	35134	VITVI01G00086,VITVI01G00499,VITVI03G00452,VITVI04G01183,VITVI05G00335,VITVI05G00396,VITVI05G00977,VITVI06G00107,VITVI07G00597,VITVI08G01708,VITVI08G00071,VITVI08G00113,VITVI09G00617,VITVI10G00796,VITVI10G00855,VITVI12G01670,VITVI12G02485,VITVI12G00767,VITVI13G01892,VITVI13G01416,VITVI14G01483,VITVI15G00752,VITVI15G00782,VITVI16G00280,VITVI16G01007,VITVI17G00411,VITVI18G01553,VITVI19G00031
GO:BP	protein-containing complex organization	GO:0043933	0.000214465	3.66864	822	1573	65	35134	VITVI17G00004,VITVI10G00387,VITVI05G04409,VITVI01G01620,VITVI01G04125,VITVI02G00842,VITVI03G00373,VITVI03G01600,VITVI04G00140,VITVI04G01432,VITVI04G01714,VITVI05G01542,VITVI06G00027,VITVI06G00222,VITVI06G01684,VITVI06G01685,VITVI06G04445,VITVI07G00323,VITVI07G00943,VITVI07G00145,VITVI07G00234,VITVI07G00025,VITVI08G01767,VITVI08G01822,VITVI08G01165,VITVI08G00113,VITVI09G00115,VITVI09G00157,VITVI09…
GO:BP	RNA splicing, via transesterification reactions with bulged adenosine as nucleophile	GO:0000377	0.000237301	3.6247	223	1573	26	35134	VITVI10G00387,VITVI01G04125,VITVI01G02047,VITVI01G02053,VITVI02G00656,VITVI02G00007,VITVI05G00639,VITVI05G00147,VITVI06G01555,VITVI07G00145,VITVI07G00234,VITVI08G02252,VITVI08G01822,VITVI11G00170,VITVI11G00452,VITVI11G00595,VITVI12G00003,VITVI13G01053,VITVI14G02588,VITVI14G00618,VITVI15G04674,VITVI14G02509,VITVI14G01827,VITVI15G01262,VITVI17G00314,VITVI18G00396
GO:BP	RNA splicing, via transesterification reactions	GO:0000375	0.000237301	3.6247	223	1573	26	35134	VITVI10G00387,VITVI01G04125,VITVI01G02047,VITVI01G02053,VITVI02G00656,VITVI02G00007,VITVI05G00639,VITVI05G00147,VITVI06G01555,VITVI07G00145,VITVI07G00234,VITVI08G02252,VITVI08G01822,VITVI11G00170,VITVI11G00452,VITVI11G00595,VITVI12G00003,VITVI13G01053,VITVI14G02588,VITVI14G00618,VITVI15G04674,VITVI14G02509,VITVI14G01827,VITVI15G01262,VITVI17G00314,VITVI18G00396
GO:BP	small molecule metabolic process	GO:0044281	0.000298038	3.52573	1516	1573	104	35134	VITVI07G01405,VITVI07G01247,VITVI02G00565,VITVI07G01437,VITVI07G04669,VITVI13G04616,VITVI07G04646,VITVI01G01563,VITVI01G01565,VITVI01G00132,VITVI01G00333,VITVI01G00360,VITVI01G00442,VITVI01G00628,VITVI01G01779,VITVI01G01758,VITVI02G00750,VITVI02G00318,VITVI02G00445,VITVI03G00097,VITVI03G00257,VITVI03G00287,VITVI03G00512,VITVI03G00452,VITVI03G00447,VITVI03G00892,VITVI04G00312,VITVI04G00410,VITVI04…
GO:BP	intracellular transport	GO:0046907	0.000314945	3.50177	700	1573	57	35134	VITVI04G04411,VITVI01G01372,VITVI01G01620,VITVI01G00368,VITVI01G04240,VITVI01G00599,VITVI01G00613,VITVI02G00007,VITVI02G00274,VITVI02G01173,VITVI03G01411,VITVI03G00848,VITVI04G00125,VITVI04G00242,VITVI04G04112,VITVI04G01014,VITVI04G01571,VITVI05G00260,VITVI05G00888,VITVI05G01255,VITVI06G00198,VITVI06G00510,VITVI06G00577,VITVI06G01401,VITVI07G00603,VITVI08G01125,VITVI08G00070,VITVI08G00755,VITVI09…
GO:BP	tRNA processing	GO:0008033	0.000351698	3.45383	138	1573	19	35134	VITVI10G04126,VITVI09G00224,VITVI11G00316,VITVI12G00317,VITVI12G01620,VITVI12G00465,VITVI13G01959,VITVI13G00286,VITVI13G00159,VITVI14G01673,VITVI14G01935,VITVI14G03097,VITVI18G00146,VITVI18G00367,VITVI18G02183,VITVI18G00960,VITVI18G01807,VITVI19G00137,VITVI19G00551
GO:BP	mitochondrial transport	GO:0006839	0.000403342	3.39433	52	1573	11	35134	VITVI02G00274,VITVI02G01173,VITVI03G00848,VITVI06G00198,VITVI06G00510,VITVI06G00577,VITVI07G00603,VITVI08G00070,VITVI12G00706,VITVI14G01545,VITVI19G00608
GO:BP	protein-RNA complex assembly	GO:0022618	0.000408111	3.38922	152	1573	20	35134	VITVI10G00387,VITVI01G04125,VITVI06G04445,VITVI07G00323,VITVI07G00145,VITVI07G00234,VITVI07G00025,VITVI08G01822,VITVI09G00520,VITVI12G01799,VITVI13G00522,VITVI13G01225,VITVI13G01669,VITVI13G00718,VITVI14G01385,VITVI15G01262,VITVI16G01104,VITVI17G00684,VITVI18G01543,VITVI18G02360
GO:BP	ribulose bisphosphate carboxylase complex assembly	GO:0110102	0.000470486	3.32745	5	1573	4	35134	VITVI06G00222,VITVI10G00049,VITVI13G04751,VITVI16G00278
GO:BP	regulatory ncRNA 3'-end processing	GO:0043628	0.000470486	3.32745	9	1573	5	35134	VITVI07G00195,VITVI08G02190,VITVI12G00367,VITVI15G01025,VITVI16G01083
GO:BP	sno(s)RNA 3'-end processing	GO:0031126	0.000470486	3.32745	9	1573	5	35134	VITVI07G00195,VITVI08G02190,VITVI12G00367,VITVI15G01025,VITVI16G01083
GO:BP	establishment of localization in cell	GO:0051649	0.000470486	3.32745	729	1573	58	35134	VITVI04G04411,VITVI01G01372,VITVI01G01620,VITVI01G00368,VITVI01G04240,VITVI01G00599,VITVI01G00613,VITVI02G00007,VITVI02G00274,VITVI02G01173,VITVI03G01411,VITVI03G00848,VITVI04G00125,VITVI04G00242,VITVI04G04112,VITVI04G00595,VITVI04G01014,VITVI04G01571,VITVI05G00260,VITVI05G00888,VITVI05G01255,VITVI06G00198,VITVI06G00510,VITVI06G00577,VITVI06G01401,VITVI07G00603,VITVI08G01125,VITVI08G00070,VITVI08…
GO:BP	mitotic cell cycle	GO:0000278	0.000470486	3.32745	275	1573	29	35134	VITVI02G00327,VITVI02G00340,VITVI03G00447,VITVI04G00465,VITVI04G00595,VITVI05G00237,VITVI06G00051,VITVI06G01847,VITVI07G00376,VITVI07G00665,VITVI07G00136,VITVI00G04521,VITVI08G01897,VITVI08G00961,VITVI08G01087,VITVI08G00019,VITVI10G00613,VITVI10G01005,VITVI12G00022,VITVI13G00361,VITVI13G01731,VITVI14G01439,VITVI15G00816,VITVI16G00436,VITVI18G00239,VITVI18G02527,VITVI18G00590,VITVI18G00040,VITVI19…
GO:BP	protein targeting to mitochondrion	GO:0006626	0.000470486	3.32745	44	1573	10	35134	VITVI02G00274,VITVI02G01173,VITVI03G00848,VITVI06G00198,VITVI06G00510,VITVI07G00603,VITVI08G00070,VITVI12G00706,VITVI14G01545,VITVI19G00608
GO:BP	protein-RNA complex organization	GO:0071826	0.000505263	3.29648	155	1573	20	35134	VITVI10G00387,VITVI01G04125,VITVI06G04445,VITVI07G00323,VITVI07G00145,VITVI07G00234,VITVI07G00025,VITVI08G01822,VITVI09G00520,VITVI12G01799,VITVI13G00522,VITVI13G01225,VITVI13G01669,VITVI13G00718,VITVI14G01385,VITVI15G01262,VITVI16G01104,VITVI17G00684,VITVI18G01543,VITVI18G02360
GO:BP	response to radiation	GO:0009314	0.00052149	3.28275	263	1573	28	35134	VITVI01G00086,VITVI01G00499,VITVI03G00452,VITVI04G01183,VITVI05G00335,VITVI05G00396,VITVI05G00977,VITVI06G00107,VITVI07G00597,VITVI08G01708,VITVI08G00071,VITVI08G00113,VITVI09G00617,VITVI10G00796,VITVI10G00855,VITVI12G01670,VITVI12G02485,VITVI12G00767,VITVI13G01892,VITVI13G01416,VITVI14G01483,VITVI15G00752,VITVI15G00782,VITVI16G00280,VITVI16G01007,VITVI17G00411,VITVI18G01553,VITVI19G00031
GO:BP	protein transmembrane transport	GO:0071806	0.000545604	3.26312	85	1573	14	35134	VITVI01G00368,VITVI02G01173,VITVI03G00848,VITVI04G01014,VITVI06G00510,VITVI06G01401,VITVI07G00603,VITVI08G00070,VITVI08G00755,VITVI12G00706,VITVI14G00476,VITVI17G00411,VITVI19G01702,VITVI19G00608
GO:BP	cellular response to oxidative stress	GO:0034599	0.000545604	3.26312	64	1573	12	35134	VITVI01G00133,VITVI02G00444,VITVI06G00358,VITVI08G01932,VITVI08G01143,VITVI10G01476,VITVI11G01651,VITVI15G01020,VITVI16G00280,VITVI16G00311,VITVI17G00974,VITVI19G00621
GO:BP	organic substance transport	GO:0071702	0.000547038	3.26198	1345	1573	93	35134	VITVI10G00358,VITVI07G04489,VITVI07G04463,VITVI08G02419,VITVI04G04411,VITVI07G02992,VITVI01G01372,VITVI01G01541,VITVI01G01620,VITVI01G04442,VITVI01G00368,VITVI01G04240,VITVI01G00599,VITVI01G00613,VITVI01G02299,VITVI02G00662,VITVI02G00007,VITVI02G00066,VITVI02G00068,VITVI02G00111,VITVI02G00274,VITVI02G00320,VITVI02G01173,VITVI03G01411,VITVI03G00848,VITVI04G00125,VITVI04G00242,VITVI04G04112,VITVI04…
GO:BP	establishment of protein localization to mitochondrion	GO:0072655	0.000648943	3.18779	46	1573	10	35134	VITVI02G00274,VITVI02G01173,VITVI03G00848,VITVI06G00198,VITVI06G00510,VITVI07G00603,VITVI08G00070,VITVI12G00706,VITVI14G01545,VITVI19G00608
GO:BP	heme metabolic process	GO:0042168	0.000648943	3.18779	29	1573	8	35134	VITVI04G02288,VITVI03G01309,VITVI07G00520,VITVI09G01304,VITVI15G00440,VITVI18G00261,VITVI19G01838,VITVI19G00767
GO:BP	protein localization to mitochondrion	GO:0070585	0.000648943	3.18779	46	1573	10	35134	VITVI02G00274,VITVI02G01173,VITVI03G00848,VITVI06G00198,VITVI06G00510,VITVI07G00603,VITVI08G00070,VITVI12G00706,VITVI14G01545,VITVI19G00608
GO:BP	cell wall organization	GO:0071555	0.000648943	3.18779	239	1573	26	35134	VITVI08G02419,VITVI01G00628,VITVI03G00235,VITVI04G00465,VITVI04G01231,VITVI05G00276,VITVI05G00043,VITVI07G00665,VITVI08G01587,VITVI08G01897,VITVI08G00805,VITVI09G00018,VITVI10G00613,VITVI10G00031,VITVI12G00586,VITVI13G01731,VITVI14G01184,VITVI15G04656,VITVI14G04048,VITVI14G02897,VITVI14G01995,VITVI15G00781,VITVI16G00717,VITVI17G00103,VITVI17G00480,VITVI17G01206
GO:BP	mitochondrial membrane organization	GO:0007006	0.000728688	3.13746	22	1573	7	35134	VITVI02G00274,VITVI06G00198,VITVI06G00510,VITVI07G01797,VITVI14G01545,VITVI19G01702,VITVI19G00608
GO:BP	endonucleolytic cleavage of tricistronic rRNA transcript (SSU-rRNA, 5.8S rRNA, LSU-rRNA)	GO:0000479	0.000803062	3.09525	10	1573	5	35134	VITVI04G01192,VITVI09G00015,VITVI14G01895,VITVI15G01001,VITVI18G00099
GO:BP	protein-containing complex assembly	GO:0065003	0.000826415	3.0828	500	1573	43	35134	VITVI17G00004,VITVI10G00387,VITVI01G04125,VITVI02G00842,VITVI03G00373,VITVI04G01432,VITVI06G00222,VITVI06G01684,VITVI06G01685,VITVI06G04445,VITVI07G00323,VITVI07G00145,VITVI07G00234,VITVI07G00025,VITVI08G01822,VITVI08G00113,VITVI09G00115,VITVI09G00157,VITVI09G00520,VITVI09G00574,VITVI10G00528,VITVI10G00049,VITVI11G00149,VITVI12G00184,VITVI12G01799,VITVI12G01670,VITVI12G00022,VITVI13G01573,VITVI13…
GO:BP	intracellular protein transport	GO:0006886	0.000848777	3.07121	469	1573	41	35134	VITVI04G04411,VITVI01G01372,VITVI01G01620,VITVI01G00368,VITVI01G04240,VITVI02G00007,VITVI02G00274,VITVI02G01173,VITVI03G01411,VITVI03G00848,VITVI04G00242,VITVI04G04112,VITVI04G01014,VITVI04G01571,VITVI05G01255,VITVI06G00198,VITVI06G00510,VITVI06G01401,VITVI07G00603,VITVI08G00070,VITVI08G00755,VITVI09G00513,VITVI10G00619,VITVI12G02057,VITVI12G04222,VITVI12G00706,VITVI13G00678,VITVI13G01222,VITVI13…
GO:BP	chloroplast rRNA processing	GO:1901259	0.000907341	3.04223	16	1573	6	35134	VITVI06G00107,VITVI08G01027,VITVI13G01777,VITVI14G01655,VITVI17G00958,VITVI18G00785
GO:BP	endoplasmic reticulum unfolded protein response	GO:0030968	0.000952099	3.02132	23	1573	7	35134	VITVI17G01311,VITVI01G04442,VITVI02G00187,VITVI04G01198,VITVI05G01545,VITVI07G01891,VITVI16G01391
GO:BP	maturation of 5.8S rRNA from tricistronic rRNA transcript (SSU-rRNA, 5.8S rRNA, LSU-rRNA)	GO:0000466	0.000952099	3.02132	23	1573	7	35134	VITVI04G01192,VITVI07G00195,VITVI09G00015,VITVI12G00367,VITVI14G01703,VITVI14G01405,VITVI15G01001
GO:BP	regulation of tetrapyrrole metabolic process	GO:1901401	0.0011374	2.94409	6	1573	4	35134	VITVI06G00107,VITVI08G01932,VITVI09G01304,VITVI12G00685
GO:BP	intracellular protein transmembrane transport	GO:0065002	0.00138582	2.85829	71	1573	12	35134	VITVI01G00368,VITVI02G01173,VITVI03G00848,VITVI04G01014,VITVI06G00510,VITVI06G01401,VITVI07G00603,VITVI08G00070,VITVI08G00755,VITVI12G00706,VITVI17G00411,VITVI19G01702
GO:BP	protein targeting	GO:0006605	0.00154962	2.80977	183	1573	21	35134	VITVI04G04411,VITVI01G01372,VITVI02G00274,VITVI02G01173,VITVI03G01411,VITVI03G00848,VITVI04G01014,VITVI06G00198,VITVI06G00510,VITVI06G01401,VITVI07G00603,VITVI08G00070,VITVI08G00755,VITVI12G00706,VITVI13G01291,VITVI14G01545,VITVI14G01999,VITVI16G01333,VITVI17G00411,VITVI19G01702,VITVI19G00608
GO:BP	cellular component assembly	GO:0022607	0.00160411	2.79477	699	1573	54	35134	VITVI08G02419,VITVI17G00004,VITVI10G00387,VITVI01G04125,VITVI02G00842,VITVI03G00447,VITVI03G00373,VITVI04G01432,VITVI04G01623,VITVI04G01743,VITVI05G00237,VITVI06G00222,VITVI06G01684,VITVI06G01685,VITVI06G04445,VITVI07G00323,VITVI07G00136,VITVI07G00145,VITVI07G00234,VITVI07G00025,VITVI08G01464,VITVI08G01468,VITVI08G01822,VITVI08G01087,VITVI08G00113,VITVI09G00115,VITVI09G00157,VITVI09G00520,VITVI09…
GO:BP	tRNA methylation	GO:0030488	0.00162271	2.78976	42	1573	9	35134	VITVI10G04126,VITVI09G00224,VITVI12G01620,VITVI13G01959,VITVI13G00286,VITVI13G00159,VITVI14G01935,VITVI14G03097,VITVI18G00367
GO:BP	Group II intron splicing	GO:0000373	0.00163632	2.78613	25	1573	7	35134	VITVI01G02047,VITVI01G02053,VITVI05G00639,VITVI12G00003,VITVI15G04674,VITVI14G01827,VITVI17G00314
GO:BP	tRNA metabolic process	GO:0006399	0.00181678	2.7407	256	1573	26	35134	VITVI10G04126,VITVI02G00318,VITVI07G00195,VITVI09G00224,VITVI10G00055,VITVI11G00316,VITVI12G00115,VITVI12G00317,VITVI12G01620,VITVI12G00367,VITVI12G00465,VITVI13G01959,VITVI13G00286,VITVI13G00159,VITVI14G01673,VITVI14G01935,VITVI14G03097,VITVI17G00022,VITVI18G00146,VITVI18G02323,VITVI18G00367,VITVI18G02183,VITVI18G00960,VITVI18G01807,VITVI19G00137,VITVI19G00551
GO:BP	chlorophyll metabolic process	GO:0015994	0.0019211	2.71645	43	1573	9	35134	VITVI06G00107,VITVI07G01750,VITVI08G01932,VITVI09G00062,VITVI12G00685,VITVI17G00609,VITVI18G00261,VITVI19G01838,VITVI19G00257
GO:BP	cellular response to chemical stress	GO:0062197	0.00197368	2.70472	74	1573	12	35134	VITVI01G00133,VITVI02G00444,VITVI06G00358,VITVI08G01932,VITVI08G01143,VITVI10G01476,VITVI11G01651,VITVI15G01020,VITVI16G00280,VITVI16G00311,VITVI17G00974,VITVI19G00621
GO:BP	nitrogen compound transport	GO:0071705	0.00197368	2.70472	1038	1573	73	35134	VITVI07G04489,VITVI07G04463,VITVI04G04411,VITVI07G02992,VITVI01G01372,VITVI01G01541,VITVI01G01620,VITVI01G04442,VITVI01G00368,VITVI01G04240,VITVI01G00599,VITVI01G00613,VITVI01G02299,VITVI02G00662,VITVI02G00007,VITVI02G00111,VITVI02G00274,VITVI02G01173,VITVI03G01411,VITVI03G00848,VITVI04G00125,VITVI04G00242,VITVI04G04112,VITVI04G01014,VITVI04G01571,VITVI05G01255,VITVI05G01264,VITVI05G01350,VITVI06…
GO:BP	tRNA modification	GO:0006400	0.00197368	2.70472	97	1573	14	35134	VITVI10G04126,VITVI09G00224,VITVI12G01620,VITVI13G01959,VITVI13G00286,VITVI13G00159,VITVI14G01673,VITVI14G01935,VITVI14G03097,VITVI18G00146,VITVI18G00367,VITVI18G02183,VITVI19G00137,VITVI19G00551
GO:BP	microtubule cytoskeleton organization	GO:0000226	0.00198392	2.70248	147	1573	18	35134	VITVI01G00543,VITVI02G00327,VITVI02G00340,VITVI03G00447,VITVI04G00595,VITVI05G00237,VITVI06G00051,VITVI06G01847,VITVI08G01357,VITVI08G00961,VITVI08G01087,VITVI10G01005,VITVI13G00361,VITVI13G00028,VITVI16G04495,VITVI17G00489,VITVI18G00590,VITVI19G00572
GO:BP	ribosome assembly	GO:0042255	0.00214725	2.66812	64	1573	11	35134	VITVI04G01743,VITVI06G04445,VITVI07G00323,VITVI07G00025,VITVI09G00520,VITVI12G01799,VITVI13G01669,VITVI13G00718,VITVI16G01104,VITVI17G00684,VITVI18G01543
GO:BP	superoxide metabolic process	GO:0006801	0.00238458	2.62259	19	1573	6	35134	VITVI02G00444,VITVI08G01932,VITVI08G00071,VITVI10G01476,VITVI15G01020,VITVI16G00280
GO:BP	external encapsulating structure organization	GO:0045229	0.00247999	2.60555	262	1573	26	35134	VITVI08G02419,VITVI01G00628,VITVI03G00235,VITVI04G00465,VITVI04G01231,VITVI05G00276,VITVI05G00043,VITVI07G00665,VITVI08G01587,VITVI08G01897,VITVI08G00805,VITVI09G00018,VITVI10G00613,VITVI10G00031,VITVI12G00586,VITVI13G01731,VITVI14G01184,VITVI15G04656,VITVI14G04048,VITVI14G02897,VITVI14G01995,VITVI15G00781,VITVI16G00717,VITVI17G00103,VITVI17G00480,VITVI17G01206
GO:BP	chlorophyll biosynthetic process	GO:0015995	0.00257263	2.58962	27	1573	7	35134	VITVI06G00107,VITVI08G01932,VITVI09G00062,VITVI17G00609,VITVI18G00261,VITVI19G01838,VITVI19G00257
GO:BP	protein import into chloroplast stroma	GO:0045037	0.00300505	2.52215	13	1573	5	35134	VITVI06G00510,VITVI06G01401,VITVI08G00755,VITVI17G00411,VITVI19G01702
GO:BP	plastid transcription	GO:0042793	0.00300505	2.52215	13	1573	5	35134	VITVI01G00025,VITVI01G00086,VITVI05G00977,VITVI07G00197,VITVI10G00855
GO:BP	response to abiotic stimulus	GO:0009628	0.00337826	2.47131	604	1573	47	35134	VITVI01G00079,VITVI01G00086,VITVI01G00499,VITVI03G00452,VITVI03G00389,VITVI04G01183,VITVI04G01432,VITVI04G01014,VITVI05G00335,VITVI05G00396,VITVI05G00977,VITVI06G00107,VITVI07G00597,VITVI08G01672,VITVI08G01708,VITVI08G01026,VITVI08G00071,VITVI08G00113,VITVI09G00224,VITVI09G00617,VITVI10G00796,VITVI10G00855,VITVI11G01651,VITVI12G00288,VITVI12G01670,VITVI12G02485,VITVI12G00685,VITVI12G00767,VITVI13…
GO:BP	macromolecule methylation	GO:0043414	0.00376412	2.42434	211	1573	22	35134	VITVI07G01405,VITVI05G04409,VITVI10G04126,VITVI01G00086,VITVI04G00134,VITVI07G02035,VITVI08G01767,VITVI09G00224,VITVI12G01620,VITVI12G00746,VITVI13G01959,VITVI13G00286,VITVI13G00159,VITVI13G01351,VITVI14G01561,VITVI14G01935,VITVI14G03097,VITVI14G01590,VITVI16G01083,VITVI18G00367,VITVI18G00920,VITVI19G01501
GO:BP	small molecule biosynthetic process	GO:0044283	0.00382196	2.41771	574	1573	45	35134	VITVI07G01247,VITVI07G04669,VITVI13G04616,VITVI07G04646,VITVI01G01758,VITVI02G00750,VITVI03G00097,VITVI03G00287,VITVI03G00512,VITVI03G00452,VITVI03G00447,VITVI04G00410,VITVI04G01183,VITVI04G01193,VITVI04G01611,VITVI05G00497,VITVI05G01694,VITVI06G00149,VITVI06G00346,VITVI06G01739,VITVI06G01518,VITVI07G01745,VITVI07G00055,VITVI07G00047,VITVI08G01672,VITVI08G00071,VITVI10G01564,VITVI10G00027,VITVI10…
GO:BP	embryo development ending in seed dormancy	GO:0009793	0.00384673	2.41491	104	1573	14	35134	VITVI03G00495,VITVI05G00335,VITVI05G00060,VITVI06G00198,VITVI06G00833,VITVI06G01401,VITVI07G00831,VITVI07G00197,VITVI13G01222,VITVI14G04618,VITVI17G00411,VITVI18G00655,VITVI18G01061,VITVI19G01702
GO:BP	thylakoid membrane organization	GO:0010027	0.00411664	2.38546	21	1573	6	35134	VITVI01G00086,VITVI01G00590,VITVI04G01195,VITVI05G00335,VITVI08G00113,VITVI11G00327
GO:BP	protein insertion into mitochondrial membrane	GO:0051204	0.00430061	2.36647	14	1573	5	35134	VITVI02G00274,VITVI06G00198,VITVI06G00510,VITVI14G01545,VITVI19G00608
GO:BP	developmental process	GO:0032502	0.00470499	2.32744	1146	1573	77	35134	VITVI08G02419,VITVI01G00031,VITVI01G00287,VITVI02G00645,VITVI02G00308,VITVI02G00341,VITVI03G00495,VITVI03G00452,VITVI04G00158,VITVI04G00287,VITVI04G01231,VITVI04G01396,VITVI04G01714,VITVI05G00335,VITVI05G00382,VITVI05G00060,VITVI05G01542,VITVI06G00107,VITVI06G00160,VITVI06G00198,VITVI06G00259,VITVI06G00272,VITVI06G00368,VITVI06G01676,VITVI06G00833,VITVI06G01401,VITVI06G01491,VITVI07G00355,VITVI07…
GO:BP	maturation of LSU-rRNA	GO:0000470	0.00470499	2.32744	39	1573	8	35134	VITVI07G01999,VITVI11G00452,VITVI12G00164,VITVI14G00746,VITVI14G01703,VITVI14G01405,VITVI17G00388,VITVI17G00910
GO:BP	cellular response to unfolded protein	GO:0034620	0.00478714	2.31992	30	1573	7	35134	VITVI17G01311,VITVI01G04442,VITVI02G00187,VITVI04G01198,VITVI05G01545,VITVI07G01891,VITVI16G01391
GO:BP	response to unfolded protein	GO:0006986	0.00478714	2.31992	30	1573	7	35134	VITVI17G01311,VITVI01G04442,VITVI02G00187,VITVI04G01198,VITVI05G01545,VITVI07G01891,VITVI16G01391
GO:BP	protein localization to organelle	GO:0033365	0.00482043	2.31691	260	1573	25	35134	VITVI01G01620,VITVI01G04240,VITVI01G00590,VITVI02G00274,VITVI02G01173,VITVI03G00848,VITVI04G04112,VITVI04G01014,VITVI06G00198,VITVI06G00510,VITVI06G01401,VITVI07G00603,VITVI08G00070,VITVI08G00755,VITVI09G00513,VITVI11G00279,VITVI12G00706,VITVI13G01222,VITVI14G01545,VITVI14G01999,VITVI15G00613,VITVI16G00436,VITVI17G00411,VITVI19G01702,VITVI19G00608
GO:BP	establishment of protein localization to organelle	GO:0072594	0.00486404	2.313	216	1573	22	35134	VITVI01G01620,VITVI01G04240,VITVI02G00274,VITVI02G01173,VITVI03G00848,VITVI04G04112,VITVI04G01014,VITVI06G00198,VITVI06G00510,VITVI06G01401,VITVI07G00603,VITVI08G00070,VITVI08G00755,VITVI09G00513,VITVI12G00706,VITVI13G01222,VITVI14G01545,VITVI14G01999,VITVI15G00613,VITVI17G00411,VITVI19G01702,VITVI19G00608
GO:BP	embryo development	GO:0009790	0.00486404	2.313	107	1573	14	35134	VITVI03G00495,VITVI05G00335,VITVI05G00060,VITVI06G00198,VITVI06G00833,VITVI06G01401,VITVI07G00831,VITVI07G00197,VITVI13G01222,VITVI14G04618,VITVI17G00411,VITVI18G00655,VITVI18G01061,VITVI19G01702
GO:BP	plastid membrane organization	GO:0009668	0.00506581	2.29535	22	1573	6	35134	VITVI01G00086,VITVI01G00590,VITVI04G01195,VITVI05G00335,VITVI08G00113,VITVI11G00327
GO:BP	protein insertion into membrane	GO:0051205	0.00506581	2.29535	22	1573	6	35134	VITVI01G00590,VITVI02G00274,VITVI06G00198,VITVI06G00510,VITVI14G01545,VITVI19G00608
GO:BP	regulation of tetrapyrrole biosynthetic process	GO:1901463	0.00543585	2.26473	4	1573	3	35134	VITVI06G00107,VITVI08G01932,VITVI09G01304
GO:BP	organic substance catabolic process	GO:1901575	0.00543585	2.26473	1451	1573	93	35134	VITVI07G01200,VITVI07G01205,VITVI13G04636,VITVI07G01405,VITVI17G01311,VITVI01G01563,VITVI01G00166,VITVI01G00360,VITVI01G00932,VITVI01G00603,VITVI01G01738,VITVI02G00842,VITVI02G00187,VITVI02G00236,VITVI03G00097,VITVI03G00206,VITVI03G00356,VITVI03G00892,VITVI04G00152,VITVI04G01198,VITVI04G01364,VITVI04G01378,VITVI05G00396,VITVI05G00612,VITVI05G01082,VITVI05G00094,VITVI05G00089,VITVI05G00043,VITVI05…
GO:BP	response to superoxide	GO:0000303	0.00555061	2.25566	15	1573	5	35134	VITVI02G00444,VITVI08G01932,VITVI10G01476,VITVI15G01020,VITVI16G00280
GO:BP	removal of superoxide radicals	GO:0019430	0.00555061	2.25566	15	1573	5	35134	VITVI02G00444,VITVI08G01932,VITVI10G01476,VITVI15G01020,VITVI16G00280
GO:BP	cellular response to superoxide	GO:0071451	0.00555061	2.25566	15	1573	5	35134	VITVI02G00444,VITVI08G01932,VITVI10G01476,VITVI15G01020,VITVI16G00280
GO:BP	cellular response to oxygen radical	GO:0071450	0.00555061	2.25566	15	1573	5	35134	VITVI02G00444,VITVI08G01932,VITVI10G01476,VITVI15G01020,VITVI16G00280
GO:BP	response to oxygen radical	GO:0000305	0.00555061	2.25566	15	1573	5	35134	VITVI02G00444,VITVI08G01932,VITVI10G01476,VITVI15G01020,VITVI16G00280
GO:BP	cell wall organization or biogenesis	GO:0071554	0.00610918	2.21402	391	1573	33	35134	VITVI08G02419,VITVI01G00628,VITVI01G00629,VITVI03G00206,VITVI03G00235,VITVI04G00465,VITVI04G01231,VITVI05G00276,VITVI05G00094,VITVI05G00089,VITVI05G00043,VITVI07G00376,VITVI07G00665,VITVI08G01587,VITVI08G01897,VITVI08G00805,VITVI09G00018,VITVI10G00613,VITVI10G00031,VITVI12G00586,VITVI13G01731,VITVI14G01184,VITVI15G04656,VITVI14G04048,VITVI14G02897,VITVI14G01995,VITVI15G00781,VITVI16G00717,VITVI16…
GO:BP	cellular response to reactive oxygen species	GO:0034614	0.00620475	2.20728	23	1573	6	35134	VITVI02G00444,VITVI08G01932,VITVI10G01476,VITVI15G01020,VITVI16G00280,VITVI19G00621
GO:BP	positive regulation of cell population proliferation	GO:0008284	0.00621785	2.20636	9	1573	4	35134	VITVI01G00031,VITVI13G01959,VITVI18G00040,VITVI19G00180
GO:BP	protein localization to chloroplast	GO:0072598	0.0065583	2.18321	32	1573	7	35134	VITVI01G00590,VITVI06G00510,VITVI06G01401,VITVI08G00755,VITVI17G00411,VITVI19G01702,VITVI19G00608
GO:BP	mitochondrial gene expression	GO:0140053	0.0066458	2.17745	52	1573	9	35134	VITVI07G02548,VITVI07G00186,VITVI09G00574,VITVI12G00115,VITVI14G01730,VITVI14G01311,VITVI14G01940,VITVI17G00022,VITVI17G01532
GO:BP	RNA methylation	GO:0001510	0.00706047	2.15117	112	1573	14	35134	VITVI07G01405,VITVI10G04126,VITVI04G00134,VITVI09G00224,VITVI12G01620,VITVI13G01959,VITVI13G00286,VITVI13G00159,VITVI14G01561,VITVI14G01935,VITVI14G03097,VITVI16G01083,VITVI18G00367,VITVI18G00920
GO:BP	protoporphyrinogen IX metabolic process	GO:0046501	0.00733648	2.13451	16	1573	5	35134	VITVI04G02288,VITVI03G01309,VITVI07G00520,VITVI18G00261,VITVI19G01838
GO:BP	establishment of protein localization to mitochondrial membrane	GO:0090151	0.00733648	2.13451	16	1573	5	35134	VITVI02G00274,VITVI06G00198,VITVI06G00510,VITVI14G01545,VITVI19G00608
GO:BP	protoporphyrinogen IX biosynthetic process	GO:0006782	0.00733648	2.13451	16	1573	5	35134	VITVI04G02288,VITVI03G01309,VITVI07G00520,VITVI18G00261,VITVI19G01838
GO:BP	cell cycle	GO:0007049	0.00879306	2.05586	551	1573	42	35134	VITVI01G01750,VITVI02G00327,VITVI02G00340,VITVI03G00447,VITVI04G00414,VITVI04G00465,VITVI04G00595,VITVI05G00237,VITVI06G00051,VITVI06G00160,VITVI06G00833,VITVI06G01847,VITVI07G00376,VITVI07G00665,VITVI07G00136,VITVI00G04521,VITVI07G02722,VITVI08G01897,VITVI08G00961,VITVI08G01087,VITVI08G00019,VITVI10G00613,VITVI10G01005,VITVI12G00353,VITVI12G00022,VITVI13G00361,VITVI13G01731,VITVI14G01184,VITVI14…
GO:BP	multicellular organismal-level homeostasis	GO:0048871	0.011467	1.94055	5	1573	3	35134	VITVI10G00605,VITVI17G00299,VITVI19G00180
GO:BP	protein insertion into mitochondrial outer membrane	GO:0045040	0.011467	1.94055	5	1573	3	35134	VITVI06G00198,VITVI06G00510,VITVI14G01545
GO:BP	outer mitochondrial membrane organization	GO:0007008	0.011467	1.94055	5	1573	3	35134	VITVI06G00198,VITVI06G00510,VITVI14G01545
GO:BP	regulation of chlorophyll metabolic process	GO:0090056	0.011467	1.94055	5	1573	3	35134	VITVI06G00107,VITVI08G01932,VITVI12G00685
GO:BP	mRNA pseudouridine synthesis	GO:1990481	0.011467	1.94055	5	1573	3	35134	VITVI08G02190,VITVI14G01673,VITVI18G00146
GO:BP	'de novo' protein folding	GO:0006458	0.012336	1.90882	46	1573	8	35134	VITVI02G00645,VITVI02G00187,VITVI15G00492,VITVI16G01391,VITVI17G00171,VITVI17G00188,VITVI17G01403,VITVI19G00569
GO:BP	lipid homeostasis	GO:0055088	0.0128297	1.89178	36	1573	7	35134	VITVI08G02419,VITVI12G00767,VITVI13G00036,VITVI13G00193,VITVI15G00935,VITVI18G00993,VITVI18G01304
GO:BP	macromolecule catabolic process	GO:0009057	0.0146749	1.83342	851	1573	58	35134	VITVI07G01200,VITVI07G01205,VITVI13G04636,VITVI17G01311,VITVI01G00166,VITVI01G00603,VITVI01G01738,VITVI02G00842,VITVI02G00187,VITVI02G00236,VITVI03G00206,VITVI03G00356,VITVI04G00152,VITVI04G01198,VITVI04G01364,VITVI05G00396,VITVI05G01082,VITVI05G00094,VITVI05G00089,VITVI05G00043,VITVI05G01545,VITVI06G00316,VITVI06G01070,VITVI07G00422,VITVI07G00195,VITVI08G01393,VITVI08G01606,VITVI08G00908,VITVI08…
GO:BP	mitochondrial transmembrane transport	GO:1990542	0.0150382	1.8228	37	1573	7	35134	VITVI02G01173,VITVI03G00848,VITVI06G00577,VITVI07G00603,VITVI08G00070,VITVI12G00706,VITVI15G01020
GO:BP	generation of precursor metabolites and energy	GO:0006091	0.0156642	1.80509	416	1573	33	35134	VITVI10G01666,VITVI17G00004,VITVI01G00360,VITVI01G01984,VITVI01G01779,VITVI02G00211,VITVI02G01640,VITVI03G00097,VITVI04G00366,VITVI04G00602,VITVI04G01280,VITVI04G01383,VITVI05G00612,VITVI05G01694,VITVI06G00574,VITVI06G01144,VITVI06G01487,VITVI08G01621,VITVI08G00102,VITVI08G00113,VITVI09G00617,VITVI09G01304,VITVI10G00129,VITVI11G00488,VITVI11G00708,VITVI12G00151,VITVI12G02485,VITVI14G04596,VITVI15…
GO:BP	ribosome localization	GO:0033750	0.0161389	1.79213	19	1573	5	35134	VITVI01G00599,VITVI04G04112,VITVI09G00015,VITVI09G00513,VITVI15G01001
GO:BP	ribosomal subunit export from nucleus	GO:0000054	0.0161389	1.79213	19	1573	5	35134	VITVI01G00599,VITVI04G04112,VITVI09G00015,VITVI09G00513,VITVI15G01001
GO:BP	homeostatic process	GO:0042592	0.0163257	1.78713	287	1573	25	35134	VITVI08G02419,VITVI02G00068,VITVI04G01751,VITVI06G00348,VITVI07G00465,VITVI08G01932,VITVI08G00642,VITVI09G01592,VITVI10G00605,VITVI10G01458,VITVI10G01621,VITVI12G02020,VITVI12G00767,VITVI13G00036,VITVI13G00193,VITVI13G01342,VITVI15G00925,VITVI15G00935,VITVI17G00299,VITVI17G00578,VITVI18G00993,VITVI18G01114,VITVI18G01304,VITVI19G00145,VITVI19G00180
GO:BP	mitotic cell cycle process	GO:1903047	0.0164522	1.78378	225	1573	21	35134	VITVI03G00447,VITVI04G00465,VITVI04G00595,VITVI05G00237,VITVI07G00376,VITVI07G00665,VITVI07G00136,VITVI00G04521,VITVI08G01897,VITVI08G01087,VITVI08G00019,VITVI10G00613,VITVI12G00022,VITVI13G00361,VITVI13G01731,VITVI14G01439,VITVI15G00816,VITVI16G00436,VITVI18G00239,VITVI18G02527,VITVI18G00040
GO:BP	mismatch repair	GO:0006298	0.0165105	1.78224	28	1573	6	35134	VITVI07G01219,VITVI05G00849,VITVI10G04308,VITVI13G00975,VITVI15G00307,VITVI16G01009
GO:BP	methylation	GO:0032259	0.0165105	1.78224	520	1573	39	35134	VITVI07G01405,VITVI05G04409,VITVI10G04126,VITVI01G00086,VITVI01G01782,VITVI02G00194,VITVI03G01145,VITVI03G00185,VITVI04G00134,VITVI04G00447,VITVI04G02123,VITVI04G01400,VITVI07G02035,VITVI08G01767,VITVI09G00224,VITVI10G00727,VITVI11G01191,VITVI12G00202,VITVI12G01620,VITVI12G00746,VITVI13G01959,VITVI13G00286,VITVI13G00159,VITVI13G01351,VITVI14G01561,VITVI14G01935,VITVI14G03097,VITVI14G01590,VITVI15…
GO:BP	cytoskeleton organization	GO:0007010	0.0165924	1.78009	272	1573	24	35134	VITVI07G04656,VITVI01G00543,VITVI01G00599,VITVI02G00327,VITVI02G00340,VITVI03G00447,VITVI04G00595,VITVI05G00237,VITVI05G00888,VITVI06G00051,VITVI06G01847,VITVI07G01599,VITVI08G01357,VITVI08G00961,VITVI08G01087,VITVI08G01165,VITVI10G01005,VITVI13G00361,VITVI13G00028,VITVI16G04495,VITVI17G00489,VITVI18G00590,VITVI18G00654,VITVI19G00572
GO:BP	catabolic process	GO:0009056	0.0180825	1.74274	1556	1573	95	35134	VITVI07G01200,VITVI07G01205,VITVI13G04636,VITVI07G01405,VITVI17G01311,VITVI01G01563,VITVI01G00166,VITVI01G00360,VITVI01G00932,VITVI01G00603,VITVI01G01738,VITVI02G00842,VITVI02G00187,VITVI02G00236,VITVI03G00097,VITVI03G00206,VITVI03G00356,VITVI03G00892,VITVI04G00152,VITVI04G01198,VITVI04G01364,VITVI04G01378,VITVI04G01623,VITVI05G00396,VITVI05G00612,VITVI05G01082,VITVI05G00094,VITVI05G00089,VITVI05…
GO:BP	peptidyl-lysine monomethylation	GO:0018026	0.0187395	1.72724	12	1573	4	35134	VITVI01G00086,VITVI07G02035,VITVI12G00746,VITVI14G01590
GO:BP	cell division	GO:0051301	0.0189196	1.72309	275	1573	24	35134	VITVI01G01750,VITVI03G00447,VITVI04G00465,VITVI04G00595,VITVI06G00272,VITVI06G00833,VITVI07G00376,VITVI07G00665,VITVI08G01467,VITVI08G01897,VITVI08G00019,VITVI10G00613,VITVI12G00022,VITVI13G01959,VITVI13G00361,VITVI13G01731,VITVI14G01184,VITVI14G00618,VITVI16G01097,VITVI17G00362,VITVI18G00239,VITVI18G02527,VITVI18G00655,VITVI19G00572
GO:BP	establishment of protein localization to chloroplast	GO:0072596	0.0193763	1.71273	29	1573	6	35134	VITVI06G00510,VITVI06G01401,VITVI08G00755,VITVI17G00411,VITVI19G01702,VITVI19G00608
GO:BP	protein targeting to chloroplast	GO:0045036	0.0193763	1.71273	29	1573	6	35134	VITVI06G00510,VITVI06G01401,VITVI08G00755,VITVI17G00411,VITVI19G01702,VITVI19G00608
GO:BP	G1/S transition of mitotic cell cycle	GO:0000082	0.019585	1.70808	6	1573	3	35134	VITVI08G00019,VITVI14G01439,VITVI18G00040
GO:BP	positive regulation of helicase activity	GO:0051096	0.019585	1.70808	6	1573	3	35134	VITVI02G01098,VITVI14G00131,VITVI16G01009
GO:BP	mRNA splicing, via spliceosome	GO:0000398	0.019585	1.70808	199	1573	19	35134	VITVI10G00387,VITVI01G04125,VITVI02G00656,VITVI02G00007,VITVI05G00147,VITVI06G01555,VITVI07G00145,VITVI07G00234,VITVI08G02252,VITVI08G01822,VITVI11G00170,VITVI11G00452,VITVI11G00595,VITVI13G01053,VITVI14G02588,VITVI14G00618,VITVI14G02509,VITVI15G01262,VITVI18G00396
GO:BP	endonucleolytic cleavage in ITS1 to separate SSU-rRNA from 5.8S rRNA and LSU-rRNA from tricistronic rRNA transcript (SSU-rRNA, 5.8S rRNA, LSU-rRNA)	GO:0000447	0.019585	1.70808	6	1573	3	35134	VITVI04G01192,VITVI09G00015,VITVI15G01001
GO:BP	cell cycle G1/S phase transition	GO:0044843	0.019585	1.70808	6	1573	3	35134	VITVI08G00019,VITVI14G01439,VITVI18G00040
GO:BP	protein peptidyl-prolyl isomerization	GO:0000413	0.0217822	1.6619	40	1573	7	35134	VITVI07G03105,VITVI01G01705,VITVI03G04055,VITVI06G00643,VITVI07G00508,VITVI14G00560,VITVI19G01640
GO:BP	DNA-templated transcription termination	GO:0006353	0.0220295	1.65699	75	1573	10	35134	VITVI06G00027,VITVI07G00613,VITVI07G00197,VITVI07G02165,VITVI08G01511,VITVI09G01408,VITVI10G01334,VITVI13G01170,VITVI16G01344,VITVI19G00621
GO:BP	regulation of cellular metabolic process	GO:0031323	0.0228488	1.64114	2637	1573	149	35134	VITVI07G02582,VITVI07G01137,VITVI01G00025,VITVI01G00545,VITVI01G00934,VITVI02G00673,VITVI02G00715,VITVI02G00007,VITVI02G00121,VITVI02G00286,VITVI03G00452,VITVI03G01600,VITVI03G00599,VITVI03G00628,VITVI04G00066,VITVI04G00140,VITVI04G00158,VITVI04G00287,VITVI04G00546,VITVI04G00596,VITVI04G01432,VITVI04G01571,VITVI04G01592,VITVI04G01623,VITVI04G04505,VITVI04G01714,VITVI05G00500,VITVI05G00624,VITVI05…
GO:BP	cellular response to iron ion starvation	GO:0010106	0.0232276	1.634	2	1573	2	35134	VITVI17G00299,VITVI17G00578
GO:BP	heme a metabolic process	GO:0046160	0.0232276	1.634	2	1573	2	35134	VITVI15G00440,VITVI19G00767
GO:BP	positive regulation of tetrapyrrole biosynthetic process	GO:1901465	0.0232276	1.634	2	1573	2	35134	VITVI06G00107,VITVI09G01304
GO:BP	positive regulation of tetrapyrrole metabolic process	GO:1901403	0.0232276	1.634	2	1573	2	35134	VITVI06G00107,VITVI09G01304
GO:BP	heme A biosynthetic process	GO:0006784	0.0232276	1.634	2	1573	2	35134	VITVI15G00440,VITVI19G00767
GO:BP	inner mitochondrial membrane organization	GO:0007007	0.0238482	1.62254	13	1573	4	35134	VITVI02G00274,VITVI07G01797,VITVI19G01702,VITVI19G00608
GO:BP	chromosome organization	GO:0051276	0.0240846	1.61826	266	1573	23	35134	VITVI03G00447,VITVI04G00261,VITVI04G00414,VITVI04G00595,VITVI04G01432,VITVI05G00237,VITVI05G01320,VITVI06G00160,VITVI06G00833,VITVI07G00136,VITVI00G04521,VITVI07G02722,VITVI08G01087,VITVI11G00149,VITVI12G01613,VITVI12G00353,VITVI14G02588,VITVI15G00816,VITVI16G00436,VITVI16G01007,VITVI16G01009,VITVI17G01459,VITVI17G01034
GO:BP	non-membrane-bounded organelle assembly	GO:0140694	0.0240846	1.61826	130	1573	14	35134	VITVI03G00447,VITVI04G01743,VITVI05G00237,VITVI06G04445,VITVI07G00323,VITVI07G00025,VITVI08G01087,VITVI09G00520,VITVI12G01799,VITVI13G01669,VITVI13G00718,VITVI16G01104,VITVI17G00684,VITVI18G01543
GO:BP	amino acid biosynthetic process	GO:0008652	0.0244653	1.61145	204	1573	19	35134	VITVI07G01247,VITVI07G04669,VITVI13G04616,VITVI01G01758,VITVI03G00287,VITVI03G00447,VITVI04G01611,VITVI05G00497,VITVI06G00346,VITVI07G00047,VITVI08G01672,VITVI08G00071,VITVI12G04066,VITVI12G01806,VITVI14G01919,VITVI14G01990,VITVI17G00910,VITVI19G00666,VITVI19G00458
GO:BP	fruit development	GO:0010154	0.0258413	1.58769	160	1573	16	35134	VITVI03G00495,VITVI05G00335,VITVI05G00060,VITVI06G00198,VITVI06G00272,VITVI06G00833,VITVI06G01401,VITVI07G00831,VITVI07G00197,VITVI13G01959,VITVI13G01222,VITVI14G04618,VITVI17G00411,VITVI18G00655,VITVI18G01061,VITVI19G01702
GO:BP	cytokinesis	GO:0000910	0.0278744	1.55479	78	1573	10	35134	VITVI01G01750,VITVI03G00447,VITVI04G00465,VITVI07G00376,VITVI07G00665,VITVI08G01897,VITVI10G00613,VITVI13G00361,VITVI13G01731,VITVI19G00572
GO:BP	protein-DNA complex organization	GO:0071824	0.0294676	1.53065	337	1573	27	35134	VITVI05G04409,VITVI03G01600,VITVI04G00140,VITVI04G01432,VITVI04G01714,VITVI05G01542,VITVI06G01684,VITVI06G01685,VITVI07G00943,VITVI08G01767,VITVI09G00115,VITVI09G00157,VITVI11G00113,VITVI11G00149,VITVI11G01444,VITVI11G01191,VITVI12G00353,VITVI12G00022,VITVI13G01428,VITVI14G02588,VITVI14G00091,VITVI15G00044,VITVI16G01083,VITVI17G00582,VITVI17G01001,VITVI18G02965,VITVI19G00673
GO:BP	polyadenylation-dependent snoRNA 3'-end processing	GO:0071051	0.0294676	1.53065	7	1573	3	35134	VITVI07G00195,VITVI12G00367,VITVI15G01025
GO:BP	regulation of helicase activity	GO:0051095	0.0294676	1.53065	7	1573	3	35134	VITVI02G01098,VITVI14G00131,VITVI16G01009
GO:BP	response to far red light	GO:0010218	0.0294676	1.53065	7	1573	3	35134	VITVI10G00855,VITVI13G01416,VITVI18G01553
GO:BP	positive regulation of mRNA processing	GO:0050685	0.0294676	1.53065	7	1573	3	35134	VITVI02G00007,VITVI05G00147,VITVI08G02252
GO:BP	positive regulation of RNA splicing	GO:0033120	0.0294676	1.53065	7	1573	3	35134	VITVI02G00007,VITVI05G00147,VITVI08G02252
GO:BP	electron transport chain	GO:0022900	0.0294676	1.53065	193	1573	18	35134	VITVI10G01666,VITVI17G00004,VITVI01G01984,VITVI02G00211,VITVI04G00366,VITVI04G00602,VITVI04G01280,VITVI06G01144,VITVI06G01487,VITVI08G01621,VITVI08G00102,VITVI09G00617,VITVI09G01304,VITVI11G00708,VITVI12G00151,VITVI14G04596,VITVI18G04095,VITVI19G00308
GO:BP	response to endoplasmic reticulum stress	GO:0034976	0.0294676	1.53065	79	1573	10	35134	VITVI17G01311,VITVI01G04442,VITVI02G00187,VITVI04G01198,VITVI05G01545,VITVI06G00284,VITVI07G01891,VITVI12G00453,VITVI13G00602,VITVI16G01391
GO:BP	positive regulation of mRNA splicing, via spliceosome	GO:0048026	0.0294676	1.53065	7	1573	3	35134	VITVI02G00007,VITVI05G00147,VITVI08G02252
GO:BP	organic hydroxy compound biosynthetic process	GO:1901617	0.0299714	1.52329	134	1573	14	35134	VITVI01G01782,VITVI03G00185,VITVI03G00512,VITVI06G00213,VITVI06G01739,VITVI07G00696,VITVI07G01745,VITVI10G00027,VITVI12G00767,VITVI14G01887,VITVI16G00278,VITVI18G00993,VITVI18G01304,VITVI18G00043
GO:BP	protein localization to membrane	GO:0072657	0.0302705	1.51898	120	1573	13	35134	VITVI04G04411,VITVI01G01372,VITVI01G01620,VITVI01G00590,VITVI02G00274,VITVI04G01014,VITVI06G00198,VITVI06G00510,VITVI12G01578,VITVI13G01291,VITVI14G01545,VITVI16G01333,VITVI19G00608
GO:BP	oxoacid metabolic process	GO:0043436	0.0311156	1.50702	964	1573	62	35134	VITVI07G01405,VITVI07G01247,VITVI07G04669,VITVI13G04616,VITVI01G00360,VITVI01G01758,VITVI02G00318,VITVI03G00097,VITVI03G00257,VITVI03G00287,VITVI03G00512,VITVI03G00452,VITVI03G00447,VITVI03G00892,VITVI04G00410,VITVI04G01193,VITVI04G01611,VITVI05G00497,VITVI05G00612,VITVI06G00149,VITVI06G00346,VITVI06G00367,VITVI06G00574,VITVI06G00659,VITVI07G00696,VITVI07G01745,VITVI07G00055,VITVI07G00047,VITVI07…
GO:BP	peptidyl-amino acid modification	GO:0018193	0.0314076	1.50297	306	1573	25	35134	VITVI15G04172,VITVI04G04411,VITVI05G04409,VITVI07G03105,VITVI04G02288,VITVI01G01372,VITVI01G00086,VITVI01G01705,VITVI03G04055,VITVI04G00414,VITVI04G01623,VITVI05G01465,VITVI06G00643,VITVI07G00508,VITVI07G02035,VITVI09G00150,VITVI10G01564,VITVI12G00685,VITVI12G00746,VITVI13G01351,VITVI14G00560,VITVI14G01590,VITVI17G00351,VITVI19G00180,VITVI19G01640
GO:BP	organic acid metabolic process	GO:0006082	0.0315467	1.50105	965	1573	62	35134	VITVI07G01405,VITVI07G01247,VITVI07G04669,VITVI13G04616,VITVI01G00360,VITVI01G01758,VITVI02G00318,VITVI03G00097,VITVI03G00257,VITVI03G00287,VITVI03G00512,VITVI03G00452,VITVI03G00447,VITVI03G00892,VITVI04G00410,VITVI04G01193,VITVI04G01611,VITVI05G00497,VITVI05G00612,VITVI06G00149,VITVI06G00346,VITVI06G00367,VITVI06G00574,VITVI06G00659,VITVI07G00696,VITVI07G01745,VITVI07G00055,VITVI07G00047,VITVI07…
GO:BP	multicellular organismal process	GO:0032501	0.0316337	1.49985	928	1573	60	35134	VITVI08G02419,VITVI01G00031,VITVI01G00139,VITVI02G00645,VITVI02G00308,VITVI02G00341,VITVI03G00495,VITVI03G00452,VITVI04G01396,VITVI04G01714,VITVI05G00335,VITVI05G00382,VITVI05G00060,VITVI05G01542,VITVI06G00160,VITVI06G00198,VITVI06G00272,VITVI06G00368,VITVI06G01676,VITVI06G00833,VITVI06G01401,VITVI06G01491,VITVI07G00355,VITVI07G00831,VITVI07G00197,VITVI07G00226,VITVI07G00088,VITVI08G01427,VITVI08…
GO:BP	flavonoid metabolic process	GO:0009812	0.031897	1.49625	23	1573	5	35134	VITVI04G01454,VITVI06G00272,VITVI13G01959,VITVI13G00225,VITVI18G00988
GO:BP	establishment of localization	GO:0051234	0.0323899	1.48959	2732	1573	152	35134	VITVI10G00358,VITVI07G04489,VITVI07G04463,VITVI08G02419,VITVI04G04411,VITVI07G02992,VITVI01G01372,VITVI01G01541,VITVI01G01620,VITVI01G04442,VITVI01G00139,VITVI01G00368,VITVI01G00390,VITVI01G04240,VITVI01G00590,VITVI01G00599,VITVI01G00613,VITVI01G02299,VITVI02G00662,VITVI02G00007,VITVI02G00066,VITVI02G00068,VITVI02G00082,VITVI02G00111,VITVI02G00274,VITVI02G01373,VITVI02G00320,VITVI02G00450,VITVI02…
GO:BP	carboxylic acid metabolic process	GO:0019752	0.0336068	1.47357	950	1573	61	35134	VITVI07G01405,VITVI07G01247,VITVI07G04669,VITVI13G04616,VITVI01G00360,VITVI01G01758,VITVI02G00318,VITVI03G00097,VITVI03G00257,VITVI03G00287,VITVI03G00512,VITVI03G00452,VITVI03G00447,VITVI03G00892,VITVI04G00410,VITVI04G01193,VITVI04G01611,VITVI05G00497,VITVI05G00612,VITVI06G00149,VITVI06G00346,VITVI06G00367,VITVI06G00574,VITVI06G00659,VITVI07G00696,VITVI07G01745,VITVI07G00055,VITVI07G00047,VITVI07…
GO:BP	regulation of cellular biosynthetic process	GO:0031326	0.0336068	1.47357	2393	1573	135	35134	VITVI07G02582,VITVI07G01137,VITVI01G00025,VITVI01G00545,VITVI01G00934,VITVI02G00673,VITVI02G00715,VITVI02G00007,VITVI02G00121,VITVI02G00286,VITVI03G01600,VITVI03G00599,VITVI03G00628,VITVI04G00066,VITVI04G00140,VITVI04G00158,VITVI04G00287,VITVI04G00546,VITVI04G00596,VITVI04G01571,VITVI04G01592,VITVI04G04505,VITVI04G01714,VITVI05G00500,VITVI05G00624,VITVI05G00977,VITVI05G00147,VITVI05G00060,VITVI05…
GO:BP	carbohydrate metabolic process	GO:0005975	0.0344583	1.46271	1178	1573	73	35134	VITVI02G00565,VITVI07G01437,VITVI00G04504,VITVI00G04505,VITVI10G00213,VITVI07G04646,VITVI01G00280,VITVI01G00360,VITVI01G00442,VITVI01G00932,VITVI01G00628,VITVI01G00629,VITVI01G01779,VITVI02G00729,VITVI02G00236,VITVI02G01204,VITVI03G00009,VITVI03G00097,VITVI03G00206,VITVI03G00235,VITVI03G00452,VITVI04G00465,VITVI04G01389,VITVI05G00612,VITVI05G01186,VITVI05G00094,VITVI05G00089,VITVI05G00043,VITVI05…
GO:BP	regulation of macromolecule biosynthetic process	GO:0010556	0.0348045	1.45836	2376	1573	134	35134	VITVI07G02582,VITVI07G01137,VITVI01G00025,VITVI01G00545,VITVI01G00934,VITVI02G00673,VITVI02G00715,VITVI02G00007,VITVI02G00121,VITVI02G00286,VITVI03G01600,VITVI03G00599,VITVI03G00628,VITVI04G00066,VITVI04G00140,VITVI04G00158,VITVI04G00287,VITVI04G00546,VITVI04G00596,VITVI04G01571,VITVI04G01592,VITVI04G04505,VITVI04G01714,VITVI05G00500,VITVI05G00624,VITVI05G00977,VITVI05G00147,VITVI05G00060,VITVI05…
GO:BP	chromatin organization	GO:0006325	0.0349037	1.45713	293	1573	24	35134	VITVI05G04409,VITVI03G01600,VITVI04G00140,VITVI04G01432,VITVI04G01714,VITVI05G01542,VITVI06G01684,VITVI06G01685,VITVI07G00943,VITVI08G01767,VITVI11G00113,VITVI11G00149,VITVI11G01444,VITVI11G01191,VITVI12G00353,VITVI13G01428,VITVI14G02588,VITVI14G00091,VITVI15G00044,VITVI16G01083,VITVI17G00582,VITVI17G01001,VITVI18G02965,VITVI19G00673
GO:BP	response to reactive oxygen species	GO:0000302	0.0351212	1.45443	95	1573	11	35134	VITVI02G00444,VITVI06G00358,VITVI08G01932,VITVI08G01143,VITVI10G01476,VITVI12G02500,VITVI15G01020,VITVI16G00280,VITVI17G00975,VITVI18G01553,VITVI19G00621
GO:BP	organic cyclic compound biosynthetic process	GO:1901362	0.0356159	1.44836	2863	1573	158	35134	VITVI07G01137,VITVI04G02288,VITVI13G04616,VITVI01G01565,VITVI01G00025,VITVI01G00086,VITVI01G00333,VITVI01G00545,VITVI01G00934,VITVI01G01782,VITVI02G00673,VITVI02G00715,VITVI02G00121,VITVI02G00286,VITVI02G00444,VITVI03G01309,VITVI03G00185,VITVI03G01600,VITVI03G00599,VITVI04G00140,VITVI04G00158,VITVI04G00287,VITVI04G00546,VITVI04G00596,VITVI04G01183,VITVI04G01611,VITVI04G01645,VITVI04G04505,VITVI04…
GO:BP	regulation of biosynthetic process	GO:0009889	0.0356586	1.44784	2399	1573	135	35134	VITVI07G02582,VITVI07G01137,VITVI01G00025,VITVI01G00545,VITVI01G00934,VITVI02G00673,VITVI02G00715,VITVI02G00007,VITVI02G00121,VITVI02G00286,VITVI03G01600,VITVI03G00599,VITVI03G00628,VITVI04G00066,VITVI04G00140,VITVI04G00158,VITVI04G00287,VITVI04G00546,VITVI04G00596,VITVI04G01571,VITVI04G01592,VITVI04G04505,VITVI04G01714,VITVI05G00500,VITVI05G00624,VITVI05G00977,VITVI05G00147,VITVI05G00060,VITVI05…
GO:BP	transport	GO:0006810	0.0361893	1.44142	2703	1573	150	35134	VITVI10G00358,VITVI07G04489,VITVI07G04463,VITVI08G02419,VITVI04G04411,VITVI07G02992,VITVI01G01372,VITVI01G01541,VITVI01G01620,VITVI01G04442,VITVI01G00139,VITVI01G00368,VITVI01G00390,VITVI01G04240,VITVI01G00599,VITVI01G00613,VITVI01G02299,VITVI02G00662,VITVI02G00007,VITVI02G00066,VITVI02G00068,VITVI02G00082,VITVI02G00111,VITVI02G00274,VITVI02G01373,VITVI02G00320,VITVI02G00450,VITVI02G01173,VITVI03…
GO:BP	localization within membrane	GO:0051668	0.0361893	1.44142	138	1573	14	35134	VITVI04G04411,VITVI01G01372,VITVI01G01620,VITVI01G00139,VITVI01G00590,VITVI02G00274,VITVI04G01014,VITVI06G00198,VITVI06G00510,VITVI12G01578,VITVI13G01291,VITVI14G01545,VITVI16G01333,VITVI19G00608
GO:BP	biological regulation	GO:0065007	0.0361893	1.44142	4388	1573	232	35134	VITVI07G00081,VITVI10G00209,VITVI07G02582,VITVI17G01311,VITVI02G00499,VITVI07G01137,VITVI01G04442,VITVI01G00025,VITVI01G00031,VITVI01G00545,VITVI01G00816,VITVI01G00934,VITVI01G01762,VITVI02G00645,VITVI02G00673,VITVI02G00715,VITVI02G00007,VITVI02G00023,VITVI02G00111,VITVI02G00121,VITVI02G00187,VITVI02G00286,VITVI02G00308,VITVI02G01098,VITVI03G01411,VITVI03G00452,VITVI03G00447,VITVI03G00773,VITVI03…
GO:BP	establishment of protein localization to membrane	GO:0090150	0.0371037	1.43058	96	1573	11	35134	VITVI04G04411,VITVI01G01372,VITVI01G00590,VITVI02G00274,VITVI04G01014,VITVI06G00198,VITVI06G00510,VITVI13G01291,VITVI14G01545,VITVI16G01333,VITVI19G00608
GO:BP	regulation of gene expression	GO:0010468	0.0398469	1.39961	2328	1573	131	35134	VITVI07G02582,VITVI07G01137,VITVI01G00025,VITVI01G00545,VITVI01G00934,VITVI02G00673,VITVI02G00715,VITVI02G00007,VITVI02G00121,VITVI02G00286,VITVI03G01600,VITVI03G00599,VITVI03G00628,VITVI04G00066,VITVI04G00140,VITVI04G00158,VITVI04G00287,VITVI04G00546,VITVI04G00596,VITVI04G01592,VITVI04G04505,VITVI04G01714,VITVI05G00500,VITVI05G00624,VITVI05G00977,VITVI05G00147,VITVI05G00060,VITVI05G01724,VITVI05…
GO:BP	positive regulation of gene expression	GO:0010628	0.0401566	1.39624	46	1573	7	35134	VITVI02G00007,VITVI05G00147,VITVI06G00027,VITVI07G00195,VITVI08G02252,VITVI14G04618,VITVI17G04155
GO:BP	protein refolding	GO:0042026	0.0402864	1.39484	35	1573	6	35134	VITVI01G00137,VITVI02G00187,VITVI07G00394,VITVI09G00186,VITVI16G01391,VITVI17G00171
GO:BP	positive regulation of ATP-dependent activity	GO:0032781	0.0402864	1.39484	8	1573	3	35134	VITVI02G01098,VITVI14G00131,VITVI16G01009
GO:BP	anatomical structure development	GO:0048856	0.0402864	1.39484	1037	1573	65	35134	VITVI08G02419,VITVI01G00031,VITVI02G00645,VITVI02G00308,VITVI02G00341,VITVI03G00495,VITVI03G00452,VITVI04G01231,VITVI04G01396,VITVI04G01714,VITVI05G00335,VITVI05G00382,VITVI05G00060,VITVI05G01542,VITVI06G00160,VITVI06G00198,VITVI06G00259,VITVI06G00272,VITVI06G00368,VITVI06G01676,VITVI06G00833,VITVI06G01401,VITVI06G01491,VITVI07G00355,VITVI07G00831,VITVI07G00197,VITVI07G00226,VITVI07G00088,VITVI08…
GO:BP	mitochondrial DNA metabolic process	GO:0032042	0.0402864	1.39484	8	1573	3	35134	VITVI02G01098,VITVI05G00849,VITVI14G00131
GO:BP	cell cycle process	GO:0022402	0.0402864	1.39484	416	1573	31	35134	VITVI01G01750,VITVI03G00447,VITVI04G00414,VITVI04G00465,VITVI04G00595,VITVI05G00237,VITVI06G00160,VITVI06G00833,VITVI07G00376,VITVI07G00665,VITVI07G00136,VITVI00G04521,VITVI07G02722,VITVI08G01897,VITVI08G01087,VITVI08G00019,VITVI10G00613,VITVI12G00353,VITVI12G00022,VITVI13G00361,VITVI13G01731,VITVI14G01439,VITVI15G00816,VITVI16G00436,VITVI16G01009,VITVI18G00239,VITVI18G02527,VITVI18G01061,VITVI18…
GO:BP	embryo sac development	GO:0009553	0.0402864	1.39484	35	1573	6	35134	VITVI02G00341,VITVI05G00382,VITVI05G01542,VITVI06G01491,VITVI07G00226,VITVI19G00675
GO:BP	localization	GO:0051179	0.0403944	1.39368	2837	1573	156	35134	VITVI10G00358,VITVI07G04489,VITVI07G04463,VITVI08G02419,VITVI04G04411,VITVI07G02992,VITVI01G01372,VITVI01G01541,VITVI01G01620,VITVI01G04442,VITVI01G00139,VITVI01G00368,VITVI01G00390,VITVI01G04240,VITVI01G00590,VITVI01G00599,VITVI01G00613,VITVI01G02299,VITVI02G00662,VITVI02G00007,VITVI02G00066,VITVI02G00068,VITVI02G00082,VITVI02G00111,VITVI02G00274,VITVI02G01373,VITVI02G00320,VITVI02G00450,VITVI02…
GO:BP	nuclear export	GO:0051168	0.0403944	1.39368	84	1573	10	35134	VITVI01G00599,VITVI01G00613,VITVI04G04112,VITVI08G01125,VITVI09G00015,VITVI09G00513,VITVI11G00440,VITVI12G01613,VITVI15G00613,VITVI15G01001
GO:BP	mRNA polyadenylation	GO:0006378	0.0407541	1.38983	25	1573	5	35134	VITVI01G00355,VITVI05G01542,VITVI08G01511,VITVI16G01052,VITVI17G00270
GO:BP	tetraterpenoid metabolic process	GO:0016108	0.0407541	1.38983	25	1573	5	35134	VITVI06G00084,VITVI06G00107,VITVI06G01518,VITVI07G01853,VITVI16G01099
GO:BP	membrane organization	GO:0061024	0.0407541	1.38983	202	1573	18	35134	VITVI01G00086,VITVI01G00590,VITVI02G00274,VITVI04G00242,VITVI04G01195,VITVI05G00335,VITVI05G01255,VITVI06G00198,VITVI06G00510,VITVI07G01797,VITVI08G00061,VITVI08G00113,VITVI11G00327,VITVI13G00018,VITVI14G01545,VITVI14G01999,VITVI19G01702,VITVI19G00608
GO:BP	carotenoid metabolic process	GO:0016116	0.0407541	1.38983	25	1573	5	35134	VITVI06G00084,VITVI06G00107,VITVI06G01518,VITVI07G01853,VITVI16G01099
GO:BP	protein import into mitochondrial matrix	GO:0030150	0.0407541	1.38983	25	1573	5	35134	VITVI02G01173,VITVI03G00848,VITVI07G00603,VITVI08G00070,VITVI12G00706
GO:BP	protein-containing complex localization	GO:0031503	0.0407541	1.38983	25	1573	5	35134	VITVI01G00599,VITVI04G04112,VITVI09G00015,VITVI09G00513,VITVI15G01001
GO:BP	multicellular organism development	GO:0007275	0.0407541	1.38983	851	1573	55	35134	VITVI08G02419,VITVI01G00031,VITVI02G00645,VITVI02G00308,VITVI02G00341,VITVI03G00495,VITVI03G00452,VITVI04G01396,VITVI04G01714,VITVI05G00335,VITVI05G00382,VITVI05G00060,VITVI05G01542,VITVI06G00160,VITVI06G00198,VITVI06G00272,VITVI06G00368,VITVI06G01676,VITVI06G00833,VITVI06G01401,VITVI06G01491,VITVI07G00355,VITVI07G00831,VITVI07G00197,VITVI07G00226,VITVI07G00088,VITVI08G01427,VITVI08G01708,VITVI09…
GO:BP	ribosomal small subunit assembly	GO:0000028	0.0407541	1.38983	25	1573	5	35134	VITVI06G04445,VITVI07G00025,VITVI09G00520,VITVI16G01104,VITVI17G00684
GO:BP	proteolysis	GO:0006508	0.0407541	1.38983	1192	1573	73	35134	VITVI07G01200,VITVI07G01205,VITVI10G00209,VITVI07G02582,VITVI13G04636,VITVI17G01311,VITVI01G00166,VITVI01G00603,VITVI01G01738,VITVI02G00842,VITVI02G00187,VITVI02G00422,VITVI02G00547,VITVI03G00286,VITVI03G01575,VITVI03G00485,VITVI03G00356,VITVI03G00708,VITVI03G01621,VITVI04G00152,VITVI04G04156,VITVI04G01198,VITVI04G01364,VITVI05G00396,VITVI05G00430,VITVI05G01082,VITVI05G01545,VITVI06G00316,VITVI06…
GO:BP	carboxylic acid biosynthetic process	GO:0046394	0.0411551	1.38558	436	1573	32	35134	VITVI07G01247,VITVI07G04669,VITVI13G04616,VITVI01G01758,VITVI03G00287,VITVI03G00512,VITVI03G00452,VITVI03G00447,VITVI04G00410,VITVI04G01193,VITVI04G01611,VITVI05G00497,VITVI06G00149,VITVI06G00346,VITVI07G01745,VITVI07G00055,VITVI07G00047,VITVI08G01672,VITVI08G00071,VITVI10G01564,VITVI10G00050,VITVI12G04066,VITVI12G01806,VITVI14G01919,VITVI14G01990,VITVI14G02043,VITVI15G00764,VITVI15G00782,VITVI17…
GO:BP	organic acid biosynthetic process	GO:0016053	0.0411551	1.38558	436	1573	32	35134	VITVI07G01247,VITVI07G04669,VITVI13G04616,VITVI01G01758,VITVI03G00287,VITVI03G00512,VITVI03G00452,VITVI03G00447,VITVI04G00410,VITVI04G01193,VITVI04G01611,VITVI05G00497,VITVI06G00149,VITVI06G00346,VITVI07G01745,VITVI07G00055,VITVI07G00047,VITVI08G01672,VITVI08G00071,VITVI10G01564,VITVI10G00050,VITVI12G04066,VITVI12G01806,VITVI14G01919,VITVI14G01990,VITVI14G02043,VITVI15G00764,VITVI15G00782,VITVI17…
GO:BP	regulation of metabolic process	GO:0019222	0.0419054	1.37773	2742	1573	151	35134	VITVI10G00209,VITVI07G02582,VITVI07G01137,VITVI01G00025,VITVI01G00545,VITVI01G00934,VITVI02G00673,VITVI02G00715,VITVI02G00007,VITVI02G00121,VITVI02G00286,VITVI03G00452,VITVI03G01600,VITVI03G00599,VITVI03G00628,VITVI04G00066,VITVI04G00140,VITVI04G00158,VITVI04G00287,VITVI04G00546,VITVI04G00596,VITVI04G01432,VITVI04G01571,VITVI04G01592,VITVI04G01623,VITVI04G04505,VITVI04G01714,VITVI05G00500,VITVI05…
GO:BP	transcription by RNA polymerase I	GO:0006360	0.0476672	1.32178	26	1573	5	35134	VITVI04G01743,VITVI07G00226,VITVI08G01871,VITVI09G00157,VITVI19G00708
GO:BP	regulation of RNA splicing	GO:0043484	0.0476672	1.32178	26	1573	5	35134	VITVI02G00007,VITVI05G00147,VITVI06G01555,VITVI07G01878,VITVI08G02252
GO:BP	reproductive structure development	GO:0048608	0.0480856	1.31798	389	1573	29	35134	VITVI01G00031,VITVI02G00308,VITVI03G00495,VITVI05G00335,VITVI05G00060,VITVI05G01542,VITVI06G00198,VITVI06G00272,VITVI06G00368,VITVI06G01676,VITVI06G00833,VITVI06G01401,VITVI07G00831,VITVI07G00197,VITVI08G01708,VITVI10G00605,VITVI10G00055,VITVI12G00685,VITVI13G01959,VITVI13G01222,VITVI13G01892,VITVI14G04618,VITVI15G00782,VITVI17G00411,VITVI18G00655,VITVI18G01061,VITVI18G01553,VITVI19G00003,VITVI19…
GO:BP	developmental growth	GO:0048589	0.0491168	1.30877	101	1573	11	35134	VITVI01G00031,VITVI02G00645,VITVI04G01231,VITVI04G01396,VITVI06G00272,VITVI10G00605,VITVI13G01959,VITVI14G01401,VITVI15G00782,VITVI18G00644,VITVI19G00180
GO:CC	intracellular anatomical structure	GO:0005622	8.58819e-84	83.0661	10380	1573	830	35134	VITVI07G01205,VITVI13G04636,VITVI07G04489,VITVI07G01405,VITVI07G01247,VITVI07G01219,VITVI02G00565,VITVI08G02419,VITVI17G01311,VITVI17G00004,VITVI04G04411,VITVI07G01137,VITVI07G02948,VITVI07G02992,VITVI07G04656,VITVI10G04226,VITVI07G03041,VITVI10G00387,VITVI05G04409,VITVI04G01545,VITVI07G03105,VITVI07G04669,VITVI07G02548,VITVI04G02288,VITVI13G04616,VITVI07G04646,VITVI01G01284,VITVI01G01372,VITVI01…
GO:CC	intracellular organelle	GO:0043229	4.97037e-71	70.3036	8795	1573	717	35134	VITVI07G01205,VITVI13G04636,VITVI07G04489,VITVI07G01405,VITVI07G01219,VITVI02G00565,VITVI08G02419,VITVI17G01311,VITVI17G00004,VITVI04G04411,VITVI07G01137,VITVI07G02948,VITVI07G02992,VITVI07G04656,VITVI10G04226,VITVI10G00387,VITVI05G04409,VITVI04G01545,VITVI07G03105,VITVI07G02548,VITVI13G04616,VITVI01G01284,VITVI01G01372,VITVI01G01457,VITVI01G01576,VITVI01G01620,VITVI01G02258,VITVI01G04442,VITVI01…
GO:CC	organelle	GO:0043226	6.61731e-71	70.1793	8827	1573	718	35134	VITVI07G01205,VITVI13G04636,VITVI07G04489,VITVI07G01405,VITVI07G01219,VITVI02G00565,VITVI08G02419,VITVI17G01311,VITVI17G00004,VITVI04G04411,VITVI07G01137,VITVI07G02948,VITVI07G02992,VITVI07G04656,VITVI10G04226,VITVI10G00387,VITVI05G04409,VITVI04G01545,VITVI07G03105,VITVI07G02548,VITVI13G04616,VITVI01G01284,VITVI01G01372,VITVI01G01457,VITVI01G01576,VITVI01G01620,VITVI01G02258,VITVI01G04442,VITVI01…
GO:CC	cellular_component	GO:0005575	4.72238e-70	69.3258	17597	1573	1130	35134	VITVI07G01205,VITVI10G00358,VITVI10G04078,VITVI10G01666,VITVI07G01078,VITVI13G04636,VITVI07G04489,VITVI07G01405,VITVI07G01247,VITVI07G01219,VITVI07G04463,VITVI02G00565,VITVI08G02419,VITVI17G01311,VITVI17G00004,VITVI02G01720,VITVI04G04411,VITVI07G04548,VITVI07G01437,VITVI07G01137,VITVI07G02948,VITVI07G02992,VITVI07G04656,VITVI10G04226,VITVI07G03041,VITVI10G00387,VITVI05G04409,VITVI10G00417,VITVI04…
GO:CC	cellular anatomical entity	GO:0110165	1.06811e-69	68.9714	17432	1573	1122	35134	VITVI07G01205,VITVI10G00358,VITVI10G04078,VITVI10G01666,VITVI07G01078,VITVI13G04636,VITVI07G04489,VITVI07G01405,VITVI07G01247,VITVI07G01219,VITVI07G04463,VITVI02G00565,VITVI08G02419,VITVI17G01311,VITVI17G00004,VITVI02G01720,VITVI04G04411,VITVI07G04548,VITVI07G01437,VITVI07G01137,VITVI07G02948,VITVI07G02992,VITVI07G04656,VITVI10G04226,VITVI07G03041,VITVI10G00387,VITVI05G04409,VITVI10G00417,VITVI04…
GO:CC	cytoplasm	GO:0005737	3.29536e-68	67.4821	6370	1573	574	35134	VITVI07G01205,VITVI13G04636,VITVI07G04489,VITVI07G01405,VITVI07G01247,VITVI02G00565,VITVI08G02419,VITVI17G01311,VITVI17G00004,VITVI04G04411,VITVI07G01137,VITVI07G02948,VITVI07G02992,VITVI10G04226,VITVI07G03041,VITVI07G04669,VITVI07G02548,VITVI04G02288,VITVI13G04616,VITVI07G04646,VITVI01G01372,VITVI01G01457,VITVI01G01563,VITVI01G01576,VITVI01G02258,VITVI01G04442,VITVI01G00025,VITVI01G00031,VITVI01…
GO:CC	intracellular membrane-bounded organelle	GO:0043231	1.54727e-58	57.8104	7998	1573	642	35134	VITVI07G01205,VITVI13G04636,VITVI07G04489,VITVI07G01405,VITVI07G01219,VITVI02G00565,VITVI08G02419,VITVI17G01311,VITVI17G00004,VITVI04G04411,VITVI07G01137,VITVI07G02948,VITVI07G02992,VITVI10G04226,VITVI10G00387,VITVI05G04409,VITVI04G01545,VITVI07G03105,VITVI07G02548,VITVI13G04616,VITVI01G01284,VITVI01G01372,VITVI01G01457,VITVI01G01576,VITVI01G01620,VITVI01G04442,VITVI01G00006,VITVI01G00025,VITVI01…
GO:CC	membrane-bounded organelle	GO:0043227	2.3266e-58	57.6333	8046	1573	644	35134	VITVI07G01205,VITVI13G04636,VITVI07G04489,VITVI07G01405,VITVI07G01219,VITVI02G00565,VITVI08G02419,VITVI17G01311,VITVI17G00004,VITVI04G04411,VITVI07G01137,VITVI07G02948,VITVI07G02992,VITVI10G04226,VITVI10G00387,VITVI05G04409,VITVI04G01545,VITVI07G03105,VITVI07G02548,VITVI13G04616,VITVI01G01284,VITVI01G01372,VITVI01G01457,VITVI01G01576,VITVI01G01620,VITVI01G04442,VITVI01G00006,VITVI01G00025,VITVI01…
GO:CC	non-membrane-bounded organelle	GO:0043228	4.19229e-34	33.3775	1823	1573	207	35134	VITVI07G01137,VITVI07G04656,VITVI04G01545,VITVI07G02548,VITVI01G01457,VITVI01G02258,VITVI01G00006,VITVI01G00025,VITVI01G00086,VITVI01G01984,VITVI01G00543,VITVI01G00859,VITVI01G00590,VITVI01G00599,VITVI02G00735,VITVI02G01321,VITVI02G00068,VITVI02G00249,VITVI02G00320,VITVI02G00327,VITVI02G00340,VITVI02G01098,VITVI03G01190,VITVI03G00089,VITVI04G00064,VITVI04G00134,VITVI04G00149,VITVI04G00261,VITVI04…
GO:CC	intracellular non-membrane-bounded organelle	GO:0043232	4.19229e-34	33.3775	1823	1573	207	35134	VITVI07G01137,VITVI07G04656,VITVI04G01545,VITVI07G02548,VITVI01G01457,VITVI01G02258,VITVI01G00006,VITVI01G00025,VITVI01G00086,VITVI01G01984,VITVI01G00543,VITVI01G00859,VITVI01G00590,VITVI01G00599,VITVI02G00735,VITVI02G01321,VITVI02G00068,VITVI02G00249,VITVI02G00320,VITVI02G00327,VITVI02G00340,VITVI02G01098,VITVI03G01190,VITVI03G00089,VITVI04G00064,VITVI04G00134,VITVI04G00149,VITVI04G00261,VITVI04…
GO:CC	protein-containing complex	GO:0032991	9.12746e-28	27.0397	2986	1573	269	35134	VITVI13G04636,VITVI07G02992,VITVI10G00387,VITVI05G04409,VITVI07G03105,VITVI07G02548,VITVI01G01563,VITVI01G01620,VITVI01G02258,VITVI01G00006,VITVI01G00025,VITVI01G00086,VITVI01G00139,VITVI01G00166,VITVI01G00368,VITVI01G01984,VITVI01G00499,VITVI01G04125,VITVI01G02047,VITVI01G02053,VITVI01G00594,VITVI01G00613,VITVI01G01738,VITVI02G00662,VITVI02G00735,VITVI02G00842,VITVI02G00007,VITVI02G01321,VITVI02…
GO:CC	plastid	GO:0009536	4.45032e-27	26.3516	1086	1573	138	35134	VITVI13G04636,VITVI08G02419,VITVI07G01137,VITVI13G04616,VITVI01G01457,VITVI01G00025,VITVI01G00086,VITVI01G00156,VITVI01G00166,VITVI01G00442,VITVI01G01984,VITVI01G00823,VITVI01G00932,VITVI01G01020,VITVI01G00590,VITVI01G01758,VITVI02G00068,VITVI03G00031,VITVI03G00169,VITVI03G00512,VITVI03G00495,VITVI03G00485,VITVI03G00356,VITVI03G00773,VITVI04G01183,VITVI04G01193,VITVI04G01195,VITVI04G01611,VITVI05…
GO:CC	ribonucleoprotein complex	GO:1990904	1.34265e-26	25.872	763	1573	111	35134	VITVI10G00387,VITVI07G03105,VITVI07G02548,VITVI01G02258,VITVI01G00006,VITVI01G04125,VITVI01G02047,VITVI01G02053,VITVI02G00735,VITVI02G00007,VITVI02G01321,VITVI02G00249,VITVI02G00341,VITVI03G01190,VITVI04G00064,VITVI04G00149,VITVI04G01192,VITVI04G02132,VITVI04G01439,VITVI04G01743,VITVI05G00254,VITVI05G00455,VITVI05G01254,VITVI05G00157,VITVI05G00147,VITVI05G01701,VITVI06G00160,VITVI06G00223,VITVI06…
GO:CC	chloroplast	GO:0009507	1.46394e-25	24.8345	1022	1573	130	35134	VITVI08G02419,VITVI07G01137,VITVI13G04616,VITVI01G01457,VITVI01G00025,VITVI01G00086,VITVI01G00156,VITVI01G00442,VITVI01G01984,VITVI01G00823,VITVI01G00932,VITVI01G01020,VITVI01G00590,VITVI01G01758,VITVI02G00068,VITVI03G00031,VITVI03G00169,VITVI03G00512,VITVI03G00495,VITVI03G00485,VITVI03G00773,VITVI04G01183,VITVI04G01193,VITVI04G01195,VITVI04G01611,VITVI05G00335,VITVI05G00612,VITVI05G00639,VITVI05…
GO:CC	nucleolus	GO:0005730	7.84406e-22	21.1055	238	1573	54	35134	VITVI04G01545,VITVI01G00006,VITVI01G00599,VITVI02G00735,VITVI03G00089,VITVI04G00134,VITVI04G01192,VITVI05G00060,VITVI06G01406,VITVI07G00312,VITVI07G00323,VITVI07G00574,VITVI07G00831,VITVI07G01999,VITVI07G00195,VITVI07G00226,VITVI07G01162,VITVI08G02190,VITVI08G01212,VITVI08G01588,VITVI08G01813,VITVI08G01871,VITVI08G00177,VITVI09G00015,VITVI09G00157,VITVI09G00520,VITVI09G00523,VITVI11G00149,VITVI11…
GO:CC	organelle lumen	GO:0043233	9.33125e-18	17.0301	692	1573	89	35134	VITVI05G04409,VITVI04G01545,VITVI07G02548,VITVI01G00006,VITVI01G00599,VITVI02G00735,VITVI02G00187,VITVI02G00274,VITVI02G00341,VITVI02G01098,VITVI03G00089,VITVI04G00134,VITVI04G01192,VITVI04G01198,VITVI04G02028,VITVI05G00254,VITVI05G00060,VITVI05G01545,VITVI06G00284,VITVI06G00314,VITVI06G00651,VITVI06G01406,VITVI07G00312,VITVI07G00323,VITVI07G00574,VITVI07G00831,VITVI07G01999,VITVI07G00195,VITVI07…
GO:CC	intracellular organelle lumen	GO:0070013	9.33125e-18	17.0301	692	1573	89	35134	VITVI05G04409,VITVI04G01545,VITVI07G02548,VITVI01G00006,VITVI01G00599,VITVI02G00735,VITVI02G00187,VITVI02G00274,VITVI02G00341,VITVI02G01098,VITVI03G00089,VITVI04G00134,VITVI04G01192,VITVI04G01198,VITVI04G02028,VITVI05G00254,VITVI05G00060,VITVI05G01545,VITVI06G00284,VITVI06G00314,VITVI06G00651,VITVI06G01406,VITVI07G00312,VITVI07G00323,VITVI07G00574,VITVI07G00831,VITVI07G01999,VITVI07G00195,VITVI07…
GO:CC	membrane-enclosed lumen	GO:0031974	9.33125e-18	17.0301	692	1573	89	35134	VITVI05G04409,VITVI04G01545,VITVI07G02548,VITVI01G00006,VITVI01G00599,VITVI02G00735,VITVI02G00187,VITVI02G00274,VITVI02G00341,VITVI02G01098,VITVI03G00089,VITVI04G00134,VITVI04G01192,VITVI04G01198,VITVI04G02028,VITVI05G00254,VITVI05G00060,VITVI05G01545,VITVI06G00284,VITVI06G00314,VITVI06G00651,VITVI06G01406,VITVI07G00312,VITVI07G00323,VITVI07G00574,VITVI07G00831,VITVI07G01999,VITVI07G00195,VITVI07…
GO:CC	preribosome	GO:0030684	2.48323e-17	16.605	83	1573	29	35134	VITVI01G00006,VITVI02G00735,VITVI02G00341,VITVI04G01192,VITVI05G01701,VITVI07G00323,VITVI07G01999,VITVI07G01162,VITVI08G01588,VITVI09G00015,VITVI09G00520,VITVI10G00908,VITVI11G00452,VITVI12G00264,VITVI12G01799,VITVI12G00029,VITVI13G01540,VITVI13G00711,VITVI14G00383,VITVI14G00746,VITVI14G01703,VITVI14G01405,VITVI15G01001,VITVI16G01514,VITVI16G01083,VITVI17G00141,VITVI17G00910,VITVI18G00540,VITVI18…
GO:CC	nucleus	GO:0005634	4.30388e-15	14.3661	4387	1573	308	35134	VITVI07G01205,VITVI07G01219,VITVI07G02948,VITVI10G04226,VITVI10G00387,VITVI05G04409,VITVI04G01545,VITVI07G03105,VITVI01G01576,VITVI01G01620,VITVI01G00006,VITVI01G00333,VITVI01G00355,VITVI01G00499,VITVI01G04125,VITVI01G00545,VITVI01G00934,VITVI01G04240,VITVI01G00599,VITVI01G00613,VITVI02G00645,VITVI02G00656,VITVI02G00660,VITVI02G00735,VITVI02G00842,VITVI02G00007,VITVI02G00023,VITVI02G00111,VITVI02…
GO:CC	plastid stroma	GO:0009532	1.19245e-14	13.9236	205	1573	41	35134	VITVI13G04636,VITVI07G01137,VITVI01G00025,VITVI01G00086,VITVI01G00166,VITVI01G00442,VITVI01G00932,VITVI01G01758,VITVI03G00356,VITVI03G00773,VITVI04G01193,VITVI04G01195,VITVI04G01611,VITVI05G00335,VITVI05G00612,VITVI05G00977,VITVI06G00107,VITVI06G00230,VITVI06G00346,VITVI07G00422,VITVI07G00128,VITVI08G01932,VITVI09G00617,VITVI09G01304,VITVI10G01476,VITVI10G01458,VITVI10G00027,VITVI12G00115,VITVI12…
GO:CC	mitochondrion	GO:0005739	1.68299e-14	13.7739	879	1573	96	35134	VITVI07G01405,VITVI17G00004,VITVI07G02548,VITVI01G00079,VITVI02G00750,VITVI02G00194,VITVI02G00274,VITVI02G00320,VITVI02G01098,VITVI02G01173,VITVI02G01640,VITVI03G00495,VITVI03G00485,VITVI03G00848,VITVI03G00892,VITVI04G00366,VITVI04G01280,VITVI04G01307,VITVI04G01383,VITVI05G00254,VITVI05G00335,VITVI05G00513,VITVI05G00639,VITVI05G00799,VITVI05G00849,VITVI05G00049,VITVI06G00107,VITVI06G00198,VITVI06…
GO:CC	nuclear lumen	GO:0031981	7.62509e-13	12.1178	549	1573	68	35134	VITVI05G04409,VITVI04G01545,VITVI01G00006,VITVI01G00599,VITVI02G00735,VITVI02G00341,VITVI03G00089,VITVI04G00134,VITVI04G01192,VITVI04G02028,VITVI05G00060,VITVI06G00314,VITVI06G01406,VITVI07G00312,VITVI07G00323,VITVI07G00574,VITVI07G00831,VITVI07G01999,VITVI07G00195,VITVI07G00226,VITVI07G01162,VITVI08G02190,VITVI08G01212,VITVI08G01588,VITVI08G01813,VITVI08G01871,VITVI08G00177,VITVI09G00015,VITVI09…
GO:CC	cytosol	GO:0005829	1.42251e-12	11.8469	1109	1573	107	35134	VITVI07G01205,VITVI07G01247,VITVI07G04646,VITVI01G02258,VITVI01G00360,VITVI01G00499,VITVI01G04125,VITVI01G00594,VITVI02G00645,VITVI02G00729,VITVI02G00842,VITVI02G01321,VITVI02G00249,VITVI02G00436,VITVI03G00097,VITVI03G00512,VITVI03G00452,VITVI04G00064,VITVI04G00149,VITVI04G01364,VITVI04G01439,VITVI04G01571,VITVI04G01623,VITVI04G01743,VITVI05G00382,VITVI05G00455,VITVI05G00961,VITVI05G01254,VITVI05…
GO:CC	cytosolic ribosome	GO:0022626	6.264e-12	11.2031	204	1573	37	35134	VITVI01G02258,VITVI02G01321,VITVI02G00249,VITVI04G00064,VITVI04G00149,VITVI04G01439,VITVI05G00455,VITVI05G01254,VITVI05G00157,VITVI06G01433,VITVI06G01491,VITVI06G04445,VITVI07G04166,VITVI07G00025,VITVI07G01329,VITVI08G01778,VITVI08G01147,VITVI09G00119,VITVI10G00712,VITVI10G01883,VITVI11G00103,VITVI11G00222,VITVI12G00155,VITVI12G00164,VITVI12G01799,VITVI13G04156,VITVI13G01229,VITVI13G00106,VITVI13…
GO:CC	chloroplast stroma	GO:0009570	3.04073e-11	10.517	194	1573	35	35134	VITVI07G01137,VITVI01G00025,VITVI01G00086,VITVI01G00442,VITVI01G00932,VITVI01G01758,VITVI03G00773,VITVI04G01193,VITVI04G01195,VITVI04G01611,VITVI05G00335,VITVI05G00612,VITVI05G00977,VITVI06G00107,VITVI06G00230,VITVI06G00346,VITVI07G00128,VITVI08G01932,VITVI09G00617,VITVI09G01304,VITVI10G01476,VITVI10G01458,VITVI10G00027,VITVI12G00115,VITVI12G02485,VITVI13G04181,VITVI13G00193,VITVI15G04674,VITVI14…
GO:CC	ribosomal subunit	GO:0044391	4.87076e-11	10.3124	262	1573	41	35134	VITVI07G02548,VITVI01G02258,VITVI02G01321,VITVI02G00249,VITVI04G00064,VITVI04G00149,VITVI04G01439,VITVI05G00254,VITVI05G00455,VITVI05G01254,VITVI05G00157,VITVI06G00160,VITVI06G00651,VITVI06G01433,VITVI06G01491,VITVI06G04445,VITVI07G04166,VITVI07G00025,VITVI07G01329,VITVI08G01778,VITVI08G01147,VITVI09G00119,VITVI10G00712,VITVI10G01883,VITVI11G00103,VITVI11G00222,VITVI12G00155,VITVI12G00164,VITVI13…
GO:CC	ribosome	GO:0005840	1.06835e-10	9.97129	426	1573	54	35134	VITVI07G02548,VITVI01G02258,VITVI02G01321,VITVI02G00249,VITVI03G01190,VITVI04G00064,VITVI04G00149,VITVI04G02132,VITVI04G01439,VITVI05G00254,VITVI05G00455,VITVI05G01254,VITVI05G00157,VITVI06G00160,VITVI06G00651,VITVI06G01433,VITVI06G01491,VITVI06G04445,VITVI07G04166,VITVI07G00025,VITVI07G00121,VITVI07G01329,VITVI08G01778,VITVI08G01147,VITVI09G00119,VITVI10G00712,VITVI10G01883,VITVI11G00103,VITVI11…
GO:CC	organelle envelope	GO:0031967	1.66306e-10	9.77909	704	1573	74	35134	VITVI08G02419,VITVI01G01457,VITVI01G01620,VITVI01G01984,VITVI01G00590,VITVI01G00613,VITVI02G00068,VITVI02G00111,VITVI02G00274,VITVI02G00320,VITVI02G01173,VITVI03G00169,VITVI03G00848,VITVI04G00125,VITVI04G01193,VITVI04G01195,VITVI04G01280,VITVI05G00335,VITVI05G01547,VITVI06G00115,VITVI06G00198,VITVI06G00346,VITVI06G00510,VITVI06G00577,VITVI06G01401,VITVI07G00520,VITVI07G00597,VITVI07G00603,VITVI07…
GO:CC	envelope	GO:0031975	1.66306e-10	9.77909	704	1573	74	35134	VITVI08G02419,VITVI01G01457,VITVI01G01620,VITVI01G01984,VITVI01G00590,VITVI01G00613,VITVI02G00068,VITVI02G00111,VITVI02G00274,VITVI02G00320,VITVI02G01173,VITVI03G00169,VITVI03G00848,VITVI04G00125,VITVI04G01193,VITVI04G01195,VITVI04G01280,VITVI05G00335,VITVI05G01547,VITVI06G00115,VITVI06G00198,VITVI06G00346,VITVI06G00510,VITVI06G00577,VITVI06G01401,VITVI07G00520,VITVI07G00597,VITVI07G00603,VITVI07…
GO:CC	nucleoid	GO:0009295	4.65845e-09	8.33176	26	1573	12	35134	VITVI07G01137,VITVI01G00025,VITVI01G00086,VITVI02G01098,VITVI04G01195,VITVI05G00977,VITVI06G00230,VITVI10G01476,VITVI14G00131,VITVI14G01940,VITVI16G00280,VITVI17G00155
GO:CC	plastid envelope	GO:0009526	7.32383e-09	8.13526	346	1573	44	35134	VITVI08G02419,VITVI01G01457,VITVI01G01984,VITVI01G00590,VITVI02G00068,VITVI03G00169,VITVI04G01193,VITVI04G01195,VITVI05G00335,VITVI05G01547,VITVI06G00115,VITVI06G00198,VITVI06G00346,VITVI06G00510,VITVI06G01401,VITVI07G00520,VITVI07G00597,VITVI08G01714,VITVI08G01795,VITVI08G01026,VITVI08G01027,VITVI08G00113,VITVI08G00755,VITVI10G01563,VITVI11G00327,VITVI12G00184,VITVI12G02485,VITVI13G01777,VITVI13…
GO:CC	plastid membrane	GO:0042170	7.30324e-08	7.13648	270	1573	36	35134	VITVI08G02419,VITVI01G01457,VITVI01G01984,VITVI01G00590,VITVI02G00068,VITVI03G00169,VITVI04G01195,VITVI05G00335,VITVI05G01547,VITVI06G00115,VITVI06G00198,VITVI06G00510,VITVI06G01401,VITVI08G01714,VITVI08G01795,VITVI08G01026,VITVI08G01027,VITVI08G00113,VITVI08G00755,VITVI10G01563,VITVI11G00327,VITVI12G00184,VITVI12G02485,VITVI13G01777,VITVI13G01385,VITVI14G01655,VITVI15G01030,VITVI16G00077,VITVI16…
GO:CC	thylakoid	GO:0009579	1.27447e-07	6.89467	276	1573	36	35134	VITVI01G01457,VITVI01G00086,VITVI01G01984,VITVI01G00590,VITVI02G00068,VITVI04G00376,VITVI04G01195,VITVI06G00115,VITVI06G01401,VITVI07G00465,VITVI07G00520,VITVI08G01714,VITVI08G01026,VITVI08G01027,VITVI08G00071,VITVI09G00617,VITVI09G01304,VITVI10G01476,VITVI10G01563,VITVI11G00327,VITVI12G00141,VITVI12G00184,VITVI12G02485,VITVI13G01573,VITVI13G01777,VITVI13G01385,VITVI13G01342,VITVI14G01655,VITVI15…
GO:CC	small-subunit processome	GO:0032040	1.28601e-07	6.89076	47	1573	14	35134	VITVI01G00006,VITVI07G01162,VITVI08G01588,VITVI09G00520,VITVI10G00908,VITVI11G00452,VITVI12G00264,VITVI13G01540,VITVI13G00711,VITVI14G00383,VITVI16G01514,VITVI16G01083,VITVI17G00141,VITVI18G00540
GO:CC	chloroplast thylakoid	GO:0009534	2.60296e-07	6.58453	199	1573	29	35134	VITVI01G01457,VITVI01G00086,VITVI01G01984,VITVI01G00590,VITVI02G00068,VITVI04G01195,VITVI06G00115,VITVI06G01401,VITVI07G00465,VITVI07G00520,VITVI08G01714,VITVI08G01026,VITVI08G01027,VITVI09G01304,VITVI10G01563,VITVI11G00327,VITVI12G00141,VITVI12G00184,VITVI12G02485,VITVI13G01777,VITVI13G01385,VITVI14G01655,VITVI15G01030,VITVI16G01981,VITVI17G00411,VITVI17G00958,VITVI18G02496,VITVI18G00349,VITVI19…
GO:CC	organelle membrane	GO:0031090	2.60296e-07	6.58453	1376	1573	107	35134	VITVI07G04489,VITVI08G02419,VITVI17G01311,VITVI01G01457,VITVI01G01984,VITVI01G00590,VITVI02G00662,VITVI02G00066,VITVI02G00068,VITVI02G00274,VITVI02G00320,VITVI02G01173,VITVI03G00169,VITVI03G00235,VITVI03G00368,VITVI03G00348,VITVI03G00848,VITVI04G00110,VITVI04G01195,VITVI04G01198,VITVI04G01231,VITVI04G01280,VITVI04G01396,VITVI04G01751,VITVI05G00335,VITVI05G01255,VITVI05G01350,VITVI05G01542,VITVI05…
GO:CC	plastid thylakoid	GO:0031976	2.60296e-07	6.58453	199	1573	29	35134	VITVI01G01457,VITVI01G00086,VITVI01G01984,VITVI01G00590,VITVI02G00068,VITVI04G01195,VITVI06G00115,VITVI06G01401,VITVI07G00465,VITVI07G00520,VITVI08G01714,VITVI08G01026,VITVI08G01027,VITVI09G01304,VITVI10G01563,VITVI11G00327,VITVI12G00141,VITVI12G00184,VITVI12G02485,VITVI13G01777,VITVI13G01385,VITVI14G01655,VITVI15G01030,VITVI16G01981,VITVI17G00411,VITVI17G00958,VITVI18G02496,VITVI18G00349,VITVI19…
GO:CC	plastid nucleoid	GO:0042646	4.79938e-07	6.31881	19	1573	9	35134	VITVI07G01137,VITVI01G00025,VITVI01G00086,VITVI04G01195,VITVI05G00977,VITVI06G00230,VITVI10G01476,VITVI16G00280,VITVI17G00155
GO:CC	membrane	GO:0016020	7.66237e-07	6.11564	9855	1573	535	35134	VITVI10G00358,VITVI10G04078,VITVI10G01666,VITVI07G01078,VITVI07G04489,VITVI07G01405,VITVI07G01247,VITVI07G01219,VITVI07G04463,VITVI02G00565,VITVI08G02419,VITVI17G01311,VITVI02G01720,VITVI04G04411,VITVI07G04548,VITVI07G01437,VITVI07G02992,VITVI10G00417,VITVI00G04504,VITVI00G04505,VITVI04G01541,VITVI04G02288,VITVI13G04616,VITVI00G04860,VITVI00G04799,VITVI01G01302,VITVI01G01372,VITVI01G01457,VITVI01…
GO:CC	cytosolic small ribosomal subunit	GO:0022627	1.43503e-06	5.84314	65	1573	15	35134	VITVI04G00149,VITVI05G00455,VITVI05G01254,VITVI05G00157,VITVI06G01491,VITVI06G04445,VITVI07G00025,VITVI09G00119,VITVI11G00103,VITVI13G04156,VITVI13G00106,VITVI13G00905,VITVI16G01104,VITVI17G04155,VITVI17G00684
GO:CC	chloroplast envelope	GO:0009941	1.651e-06	5.78225	205	1573	28	35134	VITVI08G02419,VITVI01G01457,VITVI03G00169,VITVI04G01193,VITVI04G01195,VITVI05G00335,VITVI05G01547,VITVI06G00115,VITVI06G00198,VITVI06G00510,VITVI06G01401,VITVI07G00520,VITVI07G00597,VITVI08G01795,VITVI08G00113,VITVI08G00755,VITVI10G01563,VITVI12G02485,VITVI15G00458,VITVI16G00077,VITVI16G01099,VITVI17G00411,VITVI18G00349,VITVI18G00887,VITVI18G00943,VITVI19G01702,VITVI19G00569,VITVI19G00608
GO:CC	90S preribosome	GO:0030686	2.07441e-06	5.68311	22	1573	9	35134	VITVI01G00006,VITVI04G01192,VITVI07G01162,VITVI08G01588,VITVI09G00015,VITVI09G00520,VITVI12G00029,VITVI13G01540,VITVI14G01703
GO:CC	chloroplast nucleoid	GO:0042644	2.62905e-06	5.5802	17	1573	8	35134	VITVI07G01137,VITVI01G00025,VITVI01G00086,VITVI04G01195,VITVI05G00977,VITVI06G00230,VITVI10G01476,VITVI16G00280
GO:CC	small ribosomal subunit	GO:0015935	2.62989e-06	5.58006	97	1573	18	35134	VITVI04G00149,VITVI05G00455,VITVI05G01254,VITVI05G00157,VITVI06G00160,VITVI06G00651,VITVI06G01491,VITVI06G04445,VITVI07G04166,VITVI07G00025,VITVI09G00119,VITVI11G00103,VITVI13G04156,VITVI13G00106,VITVI13G00905,VITVI16G01104,VITVI17G04155,VITVI17G00684
GO:CC	large ribosomal subunit	GO:0015934	3.94119e-06	5.40437	166	1573	24	35134	VITVI07G02548,VITVI01G02258,VITVI02G01321,VITVI02G00249,VITVI04G00064,VITVI04G01439,VITVI05G00254,VITVI06G01433,VITVI07G04166,VITVI07G01329,VITVI08G01778,VITVI08G01147,VITVI10G00712,VITVI10G01883,VITVI11G00222,VITVI12G00155,VITVI12G00164,VITVI13G01229,VITVI13G00718,VITVI16G01711,VITVI16G01054,VITVI17G01532,VITVI17G00899,VITVI19G01389
GO:CC	plastid thylakoid membrane	GO:0055035	4.58591e-06	5.33857	156	1573	23	35134	VITVI01G01457,VITVI01G01984,VITVI01G00590,VITVI02G00068,VITVI04G01195,VITVI06G00115,VITVI06G01401,VITVI08G01714,VITVI08G01026,VITVI08G01027,VITVI10G01563,VITVI11G00327,VITVI12G00184,VITVI12G02485,VITVI13G01777,VITVI13G01385,VITVI14G01655,VITVI15G01030,VITVI16G01981,VITVI17G00411,VITVI17G00958,VITVI18G00349,VITVI19G00308
GO:CC	preribosome, large subunit precursor	GO:0030687	4.58591e-06	5.33857	24	1573	9	35134	VITVI02G00735,VITVI07G00323,VITVI07G01999,VITVI12G01799,VITVI14G00746,VITVI14G01703,VITVI14G01405,VITVI15G01001,VITVI17G00910
GO:CC	cytosolic large ribosomal subunit	GO:0022625	4.96883e-06	5.30375	134	1573	21	35134	VITVI01G02258,VITVI02G01321,VITVI02G00249,VITVI04G00064,VITVI04G01439,VITVI06G01433,VITVI07G04166,VITVI07G01329,VITVI08G01778,VITVI08G01147,VITVI10G00712,VITVI10G01883,VITVI11G00222,VITVI12G00155,VITVI12G00164,VITVI13G01229,VITVI13G00718,VITVI16G01711,VITVI16G01054,VITVI17G00899,VITVI19G01389
GO:CC	thylakoid membrane	GO:0042651	8.4811e-06	5.07155	186	1573	25	35134	VITVI01G01457,VITVI01G01984,VITVI01G00590,VITVI02G00068,VITVI04G00376,VITVI04G01195,VITVI06G00115,VITVI06G01401,VITVI08G01714,VITVI08G01026,VITVI08G01027,VITVI10G01563,VITVI11G00327,VITVI12G00184,VITVI12G02485,VITVI13G01573,VITVI13G01777,VITVI13G01385,VITVI14G01655,VITVI15G01030,VITVI16G01981,VITVI17G00411,VITVI17G00958,VITVI18G00349,VITVI19G00308
GO:CC	endomembrane system	GO:0012505	9.23663e-06	5.03449	1455	1573	105	35134	VITVI07G04489,VITVI02G00565,VITVI17G01311,VITVI04G04411,VITVI07G02992,VITVI01G01372,VITVI01G01620,VITVI01G04442,VITVI01G00031,VITVI01G00243,VITVI01G00613,VITVI01G00628,VITVI01G01782,VITVI02G00645,VITVI02G00662,VITVI02G00068,VITVI02G00111,VITVI02G00187,VITVI02G00450,VITVI03G00235,VITVI03G00368,VITVI03G00636,VITVI04G00110,VITVI04G00115,VITVI04G00125,VITVI04G00242,VITVI04G00465,VITVI04G01198,VITVI04…
GO:CC	organelle outer membrane	GO:0031968	1.16981e-05	4.93188	228	1573	28	35134	VITVI01G01457,VITVI01G01984,VITVI01G00590,VITVI02G00068,VITVI03G00848,VITVI04G01195,VITVI06G00115,VITVI06G00198,VITVI06G00510,VITVI06G01401,VITVI08G01419,VITVI08G01714,VITVI08G01026,VITVI08G01027,VITVI10G01563,VITVI11G00327,VITVI12G00184,VITVI12G02485,VITVI13G01777,VITVI13G01385,VITVI14G01655,VITVI14G01545,VITVI15G01030,VITVI16G01981,VITVI17G00958,VITVI18G00349,VITVI18G00943,VITVI19G00308
GO:CC	outer membrane	GO:0019867	1.16981e-05	4.93188	228	1573	28	35134	VITVI01G01457,VITVI01G01984,VITVI01G00590,VITVI02G00068,VITVI03G00848,VITVI04G01195,VITVI06G00115,VITVI06G00198,VITVI06G00510,VITVI06G01401,VITVI08G01419,VITVI08G01714,VITVI08G01026,VITVI08G01027,VITVI10G01563,VITVI11G00327,VITVI12G00184,VITVI12G02485,VITVI13G01777,VITVI13G01385,VITVI14G01655,VITVI14G01545,VITVI15G01030,VITVI16G01981,VITVI17G00958,VITVI18G00349,VITVI18G00943,VITVI19G00308
GO:CC	chloroplast thylakoid membrane	GO:0009535	1.37529e-05	4.86161	155	1573	22	35134	VITVI01G01457,VITVI01G01984,VITVI01G00590,VITVI02G00068,VITVI04G01195,VITVI06G00115,VITVI06G01401,VITVI08G01714,VITVI08G01026,VITVI08G01027,VITVI10G01563,VITVI11G00327,VITVI12G00184,VITVI12G02485,VITVI13G01777,VITVI13G01385,VITVI14G01655,VITVI15G01030,VITVI16G01981,VITVI17G00958,VITVI18G00349,VITVI19G00308
GO:CC	catalytic complex	GO:1902494	1.6662e-05	4.77827	1161	1573	87	35134	VITVI13G04636,VITVI10G00387,VITVI05G04409,VITVI07G03105,VITVI01G01563,VITVI01G00025,VITVI01G00086,VITVI01G00166,VITVI01G01984,VITVI01G00499,VITVI01G04125,VITVI01G01738,VITVI02G00842,VITVI03G01411,VITVI03G00368,VITVI03G00356,VITVI04G00376,VITVI04G00414,VITVI04G01193,VITVI04G01231,VITVI04G01280,VITVI04G01364,VITVI04G02028,VITVI04G01571,VITVI04G01611,VITVI05G00396,VITVI05G00977,VITVI05G01694,VITVI05…
GO:CC	endoplasmic reticulum lumen	GO:0005788	5.63682e-05	4.24897	18	1573	7	35134	VITVI02G00187,VITVI04G01198,VITVI05G01545,VITVI06G00284,VITVI12G00453,VITVI13G00602,VITVI16G01391
GO:CC	photosynthetic membrane	GO:0034357	5.71154e-05	4.24325	208	1573	25	35134	VITVI01G01457,VITVI01G01984,VITVI01G00590,VITVI02G00068,VITVI04G00376,VITVI04G01195,VITVI06G00115,VITVI06G01401,VITVI08G01714,VITVI08G01026,VITVI08G01027,VITVI10G01563,VITVI11G00327,VITVI12G00184,VITVI12G02485,VITVI13G01573,VITVI13G01777,VITVI13G01385,VITVI14G01655,VITVI15G01030,VITVI16G01981,VITVI17G00411,VITVI17G00958,VITVI18G00349,VITVI19G00308
GO:CC	nuclear protein-containing complex	GO:0140513	0.000108873	3.96308	755	1573	60	35134	VITVI10G00387,VITVI05G04409,VITVI07G03105,VITVI01G01620,VITVI01G00006,VITVI01G04125,VITVI01G00613,VITVI02G00007,VITVI02G00111,VITVI03G00286,VITVI04G00125,VITVI04G02028,VITVI05G00147,VITVI06G00314,VITVI06G00833,VITVI07G00145,VITVI07G00195,VITVI07G00234,VITVI07G01162,VITVI08G02190,VITVI08G02252,VITVI08G01511,VITVI08G01588,VITVI08G01813,VITVI08G01871,VITVI08G01883,VITVI08G00022,VITVI09G00115,VITVI09…
GO:CC	bounding membrane of organelle	GO:0098588	0.000164696	3.78332	783	1573	61	35134	VITVI07G04489,VITVI01G01457,VITVI01G01984,VITVI01G00590,VITVI02G00662,VITVI02G00066,VITVI02G00068,VITVI03G00235,VITVI03G00348,VITVI03G00848,VITVI04G00110,VITVI04G01195,VITVI04G01396,VITVI05G01255,VITVI05G01350,VITVI06G00115,VITVI06G00198,VITVI06G00259,VITVI06G00348,VITVI06G00510,VITVI06G01331,VITVI06G01346,VITVI06G01401,VITVI07G00243,VITVI08G01419,VITVI08G01714,VITVI08G01026,VITVI08G01027,VITVI10…
GO:CC	plastid-encoded plastid RNA polymerase complex	GO:0000427	0.000263503	3.57921	10	1573	5	35134	VITVI01G00025,VITVI01G00086,VITVI05G00977,VITVI10G00855,VITVI17G00155
GO:CC	preribosome, small subunit precursor	GO:0030688	0.000263503	3.57921	10	1573	5	35134	VITVI01G00006,VITVI02G00341,VITVI05G01701,VITVI09G00015,VITVI18G00099
GO:CC	box C/D RNP complex	GO:0031428	0.000388168	3.41098	6	1573	4	35134	VITVI11G00452,VITVI14G00383,VITVI16G01083,VITVI17G00141
GO:CC	endoplasmic reticulum	GO:0005783	0.000777334	3.10939	607	1573	48	35134	VITVI17G01311,VITVI04G04411,VITVI01G01372,VITVI01G04442,VITVI01G00031,VITVI01G01782,VITVI02G00645,VITVI02G00187,VITVI03G00368,VITVI04G00115,VITVI04G01198,VITVI04G01231,VITVI04G01396,VITVI04G01014,VITVI04G01751,VITVI05G01906,VITVI05G01255,VITVI05G01350,VITVI05G01542,VITVI05G01545,VITVI06G00213,VITVI06G00284,VITVI07G00903,VITVI07G01891,VITVI08G01657,VITVI08G01708,VITVI08G00102,VITVI10G00022,VITVI11…
GO:CC	mitochondrial protein-containing complex	GO:0098798	0.00102049	2.99119	178	1573	20	35134	VITVI07G02548,VITVI02G00274,VITVI02G01173,VITVI03G00848,VITVI04G01280,VITVI05G00254,VITVI06G00198,VITVI06G00510,VITVI06G00651,VITVI07G01797,VITVI08G00070,VITVI10G01883,VITVI12G00706,VITVI14G01545,VITVI14G01311,VITVI14G01940,VITVI14G04596,VITVI17G01532,VITVI19G01702,VITVI19G00608
GO:CC	organelle inner membrane	GO:0019866	0.00102753	2.98821	264	1573	26	35134	VITVI08G02419,VITVI02G00274,VITVI02G00320,VITVI02G01173,VITVI04G01280,VITVI05G00335,VITVI05G01547,VITVI06G01401,VITVI07G00603,VITVI07G01797,VITVI08G00070,VITVI08G00755,VITVI09G01592,VITVI12G00642,VITVI12G00706,VITVI13G00036,VITVI13G00193,VITVI14G04596,VITVI14G02991,VITVI16G00077,VITVI17G00186,VITVI17G00411,VITVI19G00767,VITVI19G01702,VITVI19G01725,VITVI19G00608
GO:CC	endopeptidase Clp complex	GO:0009368	0.00111095	2.9543	13	1573	5	35134	VITVI13G04636,VITVI01G00166,VITVI03G00356,VITVI07G00422,VITVI14G01006
GO:CC	sno(s)RNA-containing ribonucleoprotein complex	GO:0005732	0.00155774	2.8075	21	1573	6	35134	VITVI08G02190,VITVI08G01813,VITVI11G00452,VITVI14G00383,VITVI16G01083,VITVI17G00141
GO:CC	chloroplast inner membrane	GO:0009706	0.00178633	2.74804	39	1573	8	35134	VITVI08G02419,VITVI05G00335,VITVI05G01547,VITVI06G01401,VITVI08G00755,VITVI16G00077,VITVI17G00411,VITVI19G01702
GO:CC	plastid chromosome	GO:0009508	0.00213228	2.67115	4	1573	3	35134	VITVI01G00086,VITVI04G01195,VITVI17G00155
GO:CC	nascent polypeptide-associated complex	GO:0005854	0.00213228	2.67115	4	1573	3	35134	VITVI13G01291,VITVI16G01333,VITVI17G01207
GO:CC	chloroplast membrane	GO:0031969	0.00269686	2.56914	111	1573	14	35134	VITVI08G02419,VITVI03G00169,VITVI05G00335,VITVI05G01547,VITVI06G00510,VITVI06G01401,VITVI08G01795,VITVI08G00113,VITVI08G00755,VITVI16G00077,VITVI16G01099,VITVI17G00411,VITVI18G00943,VITVI19G01702
GO:CC	mitochondrial membrane	GO:0031966	0.00311751	2.50619	270	1573	25	35134	VITVI02G00274,VITVI02G00320,VITVI02G01173,VITVI03G00848,VITVI04G01280,VITVI06G00198,VITVI06G00510,VITVI06G00577,VITVI07G00603,VITVI07G01797,VITVI08G01419,VITVI08G00070,VITVI09G01592,VITVI12G00642,VITVI12G00706,VITVI13G00036,VITVI13G00193,VITVI14G01545,VITVI14G04596,VITVI14G02991,VITVI17G00186,VITVI19G00767,VITVI19G01702,VITVI19G01725,VITVI19G00608
GO:CC	vacuole	GO:0005773	0.00330117	2.48133	366	1573	31	35134	VITVI01G00243,VITVI01G00603,VITVI02G00066,VITVI03G00009,VITVI03G00348,VITVI04G01389,VITVI04G01396,VITVI04G01623,VITVI05G01350,VITVI06G00348,VITVI06G00966,VITVI06G01331,VITVI06G01346,VITVI07G01916,VITVI07G00243,VITVI08G01656,VITVI08G01657,VITVI10G00567,VITVI12G00099,VITVI12G04222,VITVI13G02067,VITVI13G01095,VITVI14G01720,VITVI14G01390,VITVI14G03060,VITVI14G00236,VITVI15G00458,VITVI15G00571,VITVI18…
GO:CC	plastid inner membrane	GO:0009528	0.00330117	2.48133	43	1573	8	35134	VITVI08G02419,VITVI05G00335,VITVI05G01547,VITVI06G01401,VITVI08G00755,VITVI16G00077,VITVI17G00411,VITVI19G01702
GO:CC	outer mitochondrial membrane protein complex	GO:0098799	0.00383589	2.41613	10	1573	4	35134	VITVI03G00848,VITVI06G00198,VITVI06G00510,VITVI14G01545
GO:CC	mitochondrial outer membrane translocase complex	GO:0005742	0.00383589	2.41613	10	1573	4	35134	VITVI03G00848,VITVI06G00198,VITVI06G00510,VITVI14G01545
GO:CC	exosome (RNase complex)	GO:0000178	0.00394079	2.40442	17	1573	5	35134	VITVI04G02028,VITVI07G00195,VITVI12G00367,VITVI14G01940,VITVI15G01025
GO:CC	intracellular protein-containing complex	GO:0140535	0.0041973	2.37703	591	1573	44	35134	VITVI01G00025,VITVI01G00086,VITVI01G00499,VITVI01G00594,VITVI01G01738,VITVI02G00842,VITVI04G00414,VITVI04G01364,VITVI05G00396,VITVI05G00977,VITVI05G01465,VITVI06G00230,VITVI06G00314,VITVI06G00316,VITVI07G00943,VITVI07G02050,VITVI08G01212,VITVI08G01393,VITVI08G01464,VITVI08G01871,VITVI09G00115,VITVI09G00157,VITVI10G00855,VITVI10G00914,VITVI11G00095,VITVI11G00517,VITVI11G00935,VITVI12G00115,VITVI12…
GO:CC	mitochondrial envelope	GO:0005740	0.00434255	2.36226	278	1573	25	35134	VITVI02G00274,VITVI02G00320,VITVI02G01173,VITVI03G00848,VITVI04G01280,VITVI06G00198,VITVI06G00510,VITVI06G00577,VITVI07G00603,VITVI07G01797,VITVI08G01419,VITVI08G00070,VITVI09G01592,VITVI12G00642,VITVI12G00706,VITVI13G00036,VITVI13G00193,VITVI14G01545,VITVI14G04596,VITVI14G02991,VITVI17G00186,VITVI19G00767,VITVI19G01702,VITVI19G01725,VITVI19G00608
GO:CC	exoribonuclease complex	GO:1905354	0.00505915	2.29592	18	1573	5	35134	VITVI04G02028,VITVI07G00195,VITVI12G00367,VITVI14G01940,VITVI15G01025
GO:CC	nuclear exosome (RNase complex)	GO:0000176	0.00545554	2.26316	11	1573	4	35134	VITVI04G02028,VITVI07G00195,VITVI12G00367,VITVI15G01025
GO:CC	Golgi apparatus	GO:0005794	0.00555439	2.25536	671	1573	48	35134	VITVI07G04489,VITVI02G00565,VITVI04G04411,VITVI07G02992,VITVI01G01372,VITVI01G00243,VITVI01G00628,VITVI02G00662,VITVI02G00068,VITVI02G00450,VITVI03G00235,VITVI03G00636,VITVI04G00110,VITVI04G00115,VITVI04G00465,VITVI04G01396,VITVI05G00394,VITVI05G01906,VITVI06G00577,VITVI07G00376,VITVI07G00378,VITVI07G00416,VITVI07G00088,VITVI07G01504,VITVI08G01897,VITVI08G00771,VITVI09G00068,VITVI09G01374,VITVI10…
GO:CC	mitochondrial matrix	GO:0005759	0.00617477	2.20938	109	1573	13	35134	VITVI07G02548,VITVI02G01098,VITVI05G00254,VITVI06G00651,VITVI08G00070,VITVI09G00521,VITVI10G01883,VITVI14G00131,VITVI14G01940,VITVI15G00492,VITVI16G01413,VITVI17G01403,VITVI17G01532
GO:CC	U2-type spliceosomal complex	GO:0005684	0.00797075	2.0985	39	1573	7	35134	VITVI10G00387,VITVI07G00145,VITVI07G00234,VITVI11G00595,VITVI13G01053,VITVI15G01262,VITVI15G00994
GO:CC	Pwp2p-containing subcomplex of 90S preribosome	GO:0034388	0.00810786	2.09109	6	1573	3	35134	VITVI07G01162,VITVI08G01588,VITVI09G00520
GO:CC	endoplasmic reticulum chaperone complex	GO:0034663	0.00810786	2.09109	6	1573	3	35134	VITVI02G00187,VITVI04G01014,VITVI16G01391
GO:CC	spliceosomal complex	GO:0005681	0.00959774	2.01783	143	1573	15	35134	VITVI10G00387,VITVI07G03105,VITVI01G04125,VITVI02G00007,VITVI05G00147,VITVI07G00145,VITVI07G00234,VITVI08G02252,VITVI11G00170,VITVI11G00452,VITVI11G00595,VITVI13G01053,VITVI14G00618,VITVI15G01262,VITVI15G00994
GO:CC	U1 snRNP	GO:0005685	0.00976704	2.01024	21	1573	5	35134	VITVI01G04125,VITVI07G00145,VITVI07G00234,VITVI13G01053,VITVI15G01262
GO:CC	chaperonin-containing T-complex	GO:0005832	0.0100115	1.9995	13	1573	4	35134	VITVI01G00594,VITVI07G02050,VITVI14G01224,VITVI17G00263
GO:CC	microtubule	GO:0005874	0.0103513	1.98501	235	1573	21	35134	VITVI07G04656,VITVI01G00543,VITVI02G00320,VITVI02G00327,VITVI02G00340,VITVI06G00051,VITVI06G01847,VITVI08G02222,VITVI08G01357,VITVI08G01822,VITVI08G00961,VITVI08G01087,VITVI10G01005,VITVI13G00361,VITVI13G00028,VITVI14G01621,VITVI16G04495,VITVI17G00489,VITVI17G00722,VITVI18G00590,VITVI18G00655
GO:CC	microtubule cytoskeleton	GO:0015630	0.0104438	1.98114	267	1573	23	35134	VITVI07G04656,VITVI01G00543,VITVI02G00320,VITVI02G00327,VITVI02G00340,VITVI06G00051,VITVI06G01847,VITVI08G02222,VITVI08G01357,VITVI08G01822,VITVI08G00961,VITVI08G01087,VITVI10G01005,VITVI13G00361,VITVI13G00028,VITVI14G01621,VITVI16G00436,VITVI16G04495,VITVI17G00489,VITVI17G00722,VITVI18G00590,VITVI18G00655,VITVI19G00572
GO:CC	cytoskeleton	GO:0005856	0.0117331	1.93059	385	1573	30	35134	VITVI07G04656,VITVI01G00543,VITVI01G00859,VITVI02G00320,VITVI02G00327,VITVI02G00340,VITVI05G00888,VITVI06G00051,VITVI06G01847,VITVI08G02222,VITVI08G01357,VITVI08G01822,VITVI08G00961,VITVI08G01087,VITVI08G01165,VITVI10G01005,VITVI11G00056,VITVI12G00837,VITVI13G00361,VITVI13G00028,VITVI14G01621,VITVI16G00436,VITVI16G04495,VITVI17G00351,VITVI17G00489,VITVI17G00722,VITVI18G00590,VITVI18G00654,VITVI18…
GO:CC	transferase complex	GO:1990234	0.0118798	1.92519	576	1573	41	35134	VITVI05G04409,VITVI01G00025,VITVI01G00086,VITVI01G00499,VITVI01G01738,VITVI03G00368,VITVI04G00414,VITVI04G01231,VITVI04G01364,VITVI04G01571,VITVI05G00396,VITVI05G00977,VITVI05G01694,VITVI05G01465,VITVI06G00314,VITVI07G00943,VITVI08G01212,VITVI08G01871,VITVI08G00019,VITVI09G00115,VITVI09G00157,VITVI10G00855,VITVI11G00095,VITVI12G00264,VITVI13G00512,VITVI14G01311,VITVI14G02006,VITVI15G00935,VITVI15…
GO:CC	mitochondrial nucleoid	GO:0042645	0.0125491	1.90139	7	1573	3	35134	VITVI02G01098,VITVI14G00131,VITVI14G01940
GO:CC	polymeric cytoskeletal fiber	GO:0099513	0.013915	1.85652	242	1573	21	35134	VITVI07G04656,VITVI01G00543,VITVI02G00320,VITVI02G00327,VITVI02G00340,VITVI06G00051,VITVI06G01847,VITVI08G02222,VITVI08G01357,VITVI08G01822,VITVI08G00961,VITVI08G01087,VITVI10G01005,VITVI13G00361,VITVI13G00028,VITVI14G01621,VITVI16G04495,VITVI17G00489,VITVI17G00722,VITVI18G00590,VITVI18G00655
GO:CC	trans-Golgi network	GO:0005802	0.0211039	1.67564	113	1573	12	35134	VITVI02G00565,VITVI01G00243,VITVI04G00465,VITVI07G00376,VITVI07G00088,VITVI08G01897,VITVI09G01374,VITVI10G00613,VITVI14G00238,VITVI15G01045,VITVI18G00334,VITVI18G00960
GO:CC	organelle subcompartment	GO:0031984	0.0211039	1.67564	438	1573	32	35134	VITVI02G00565,VITVI17G01311,VITVI01G00243,VITVI03G00368,VITVI04G00465,VITVI04G01198,VITVI04G01231,VITVI04G01751,VITVI05G01255,VITVI05G01350,VITVI05G01542,VITVI05G01545,VITVI06G00213,VITVI07G00376,VITVI07G01891,VITVI07G00088,VITVI08G01708,VITVI08G01897,VITVI09G01374,VITVI10G00613,VITVI10G00022,VITVI12G00093,VITVI12G00269,VITVI14G01699,VITVI14G01999,VITVI14G00238,VITVI15G00935,VITVI15G01045,VITVI15…
GO:CC	mitochondrial inner membrane	GO:0005743	0.0211039	1.67564	220	1573	19	35134	VITVI02G00274,VITVI02G00320,VITVI02G01173,VITVI04G01280,VITVI07G00603,VITVI07G01797,VITVI08G00070,VITVI09G01592,VITVI12G00642,VITVI12G00706,VITVI13G00036,VITVI13G00193,VITVI14G04596,VITVI14G02991,VITVI17G00186,VITVI19G00767,VITVI19G01702,VITVI19G01725,VITVI19G00608
GO:CC	spliceosomal tri-snRNP complex	GO:0097526	0.0211039	1.67564	36	1573	6	35134	VITVI01G04125,VITVI07G00145,VITVI11G00452,VITVI11G00595,VITVI13G01053,VITVI15G01262
GO:CC	supramolecular fiber	GO:0099512	0.0211039	1.67564	252	1573	21	35134	VITVI07G04656,VITVI01G00543,VITVI02G00320,VITVI02G00327,VITVI02G00340,VITVI06G00051,VITVI06G01847,VITVI08G02222,VITVI08G01357,VITVI08G01822,VITVI08G00961,VITVI08G01087,VITVI10G01005,VITVI13G00361,VITVI13G00028,VITVI14G01621,VITVI16G04495,VITVI17G00489,VITVI17G00722,VITVI18G00590,VITVI18G00655
GO:CC	supramolecular polymer	GO:0099081	0.0211039	1.67564	252	1573	21	35134	VITVI07G04656,VITVI01G00543,VITVI02G00320,VITVI02G00327,VITVI02G00340,VITVI06G00051,VITVI06G01847,VITVI08G02222,VITVI08G01357,VITVI08G01822,VITVI08G00961,VITVI08G01087,VITVI10G01005,VITVI13G00361,VITVI13G00028,VITVI14G01621,VITVI16G04495,VITVI17G00489,VITVI17G00722,VITVI18G00590,VITVI18G00655
GO:CC	chromatin	GO:0000785	0.0239334	1.621	223	1573	19	35134	VITVI04G01432,VITVI05G01465,VITVI05G01542,VITVI06G01684,VITVI06G01685,VITVI06G00833,VITVI07G00943,VITVI07G00219,VITVI09G00115,VITVI11G00149,VITVI11G01444,VITVI14G02588,VITVI14G00091,VITVI14G01439,VITVI15G00044,VITVI17G00351,VITVI17G00582,VITVI17G01034,VITVI18G02965
GO:CC	U2-type catalytic step 2 spliceosome	GO:0071007	0.0239334	1.621	3	1573	2	35134	VITVI10G00387,VITVI11G00595
GO:CC	box H/ACA RNP complex	GO:0072588	0.0239334	1.621	3	1573	2	35134	VITVI08G02190,VITVI08G01813
GO:CC	box H/ACA snoRNP complex	GO:0031429	0.0239334	1.621	3	1573	2	35134	VITVI08G02190,VITVI08G01813
GO:CC	catalytic step 2 spliceosome	GO:0071013	0.0267908	1.57201	50	1573	7	35134	VITVI10G00387,VITVI07G03105,VITVI01G04125,VITVI07G00145,VITVI11G00595,VITVI13G01053,VITVI15G01262
GO:CC	cortical microtubule cytoskeleton	GO:0030981	0.0287326	1.54162	18	1573	4	35134	VITVI08G01357,VITVI13G00028,VITVI16G04495,VITVI17G00489
GO:CC	cortical microtubule	GO:0055028	0.0287326	1.54162	18	1573	4	35134	VITVI08G01357,VITVI13G00028,VITVI16G04495,VITVI17G00489
GO:CC	protein folding chaperone complex	GO:0101031	0.0287326	1.54162	18	1573	4	35134	VITVI01G00594,VITVI07G02050,VITVI14G01224,VITVI17G00263
GO:CC	U5 snRNP	GO:0005682	0.0287326	1.54162	18	1573	4	35134	VITVI01G04125,VITVI07G00145,VITVI13G01053,VITVI15G01262
GO:CC	protein-DNA complex	GO:0032993	0.0287326	1.54162	261	1573	21	35134	VITVI03G00319,VITVI04G01432,VITVI05G01465,VITVI05G01542,VITVI06G01684,VITVI06G01685,VITVI06G00833,VITVI07G00943,VITVI07G00219,VITVI09G00115,VITVI11G00149,VITVI11G01444,VITVI12G00022,VITVI14G02588,VITVI14G00091,VITVI14G01439,VITVI15G00044,VITVI17G00351,VITVI17G00582,VITVI17G01034,VITVI18G02965
GO:CC	nuclear pore	GO:0005643	0.028884	1.53934	64	1573	8	35134	VITVI01G01620,VITVI01G00613,VITVI02G00111,VITVI04G00125,VITVI11G00787,VITVI12G01613,VITVI14G01575,VITVI15G00613
GO:CC	endoplasmic reticulum protein-containing complex	GO:0140534	0.028884	1.53934	91	1573	10	35134	VITVI02G00187,VITVI03G00368,VITVI04G01231,VITVI04G01014,VITVI07G01891,VITVI14G01699,VITVI15G00935,VITVI15G00882,VITVI16G01391,VITVI17G00132
GO:CC	cytoplasmic exosome (RNase complex)	GO:0000177	0.0317881	1.49774	10	1573	3	35134	VITVI07G00195,VITVI14G01940,VITVI15G01025
GO:CC	transferase complex, transferring phosphorus-containing groups	GO:0061695	0.0317881	1.49774	248	1573	20	35134	VITVI01G00025,VITVI01G00086,VITVI05G00977,VITVI06G00314,VITVI08G01871,VITVI08G00019,VITVI09G00115,VITVI09G00157,VITVI10G00855,VITVI11G00095,VITVI14G01311,VITVI14G02006,VITVI16G01285,VITVI17G00155,VITVI17G00648,VITVI18G00239,VITVI18G02527,VITVI18G00040,VITVI19G00708,VITVI19G01551
GO:CC	mitochondrial large ribosomal subunit	GO:0005762	0.0330399	1.48096	19	1573	4	35134	VITVI07G02548,VITVI05G00254,VITVI10G01883,VITVI17G01532
GO:CC	cortical cytoskeleton	GO:0030863	0.0330399	1.48096	19	1573	4	35134	VITVI08G01357,VITVI13G00028,VITVI16G04495,VITVI17G00489
GO:CC	organellar large ribosomal subunit	GO:0000315	0.0330399	1.48096	19	1573	4	35134	VITVI07G02548,VITVI05G00254,VITVI10G01883,VITVI17G01532
GO:CC	eukaryotic translation initiation factor 3 complex, eIF3m	GO:0071541	0.0406396	1.39105	4	1573	2	35134	VITVI13G00522,VITVI14G01385
GO:CC	mismatch repair complex	GO:0032300	0.0406396	1.39105	11	1573	3	35134	VITVI05G00849,VITVI15G00307,VITVI16G01009
GO:CC	Sm-like protein family complex	GO:0120114	0.0455411	1.3416	70	1573	8	35134	VITVI01G04125,VITVI07G00145,VITVI07G00234,VITVI08G01822,VITVI11G00452,VITVI11G00595,VITVI13G01053,VITVI15G01262
GO:CC	Golgi apparatus subcompartment	GO:0098791	0.0493273	1.30691	130	1573	12	35134	VITVI02G00565,VITVI01G00243,VITVI04G00465,VITVI07G00376,VITVI07G00088,VITVI08G01897,VITVI09G01374,VITVI10G00613,VITVI14G00238,VITVI15G01045,VITVI18G00334,VITVI18G00960
GO:CC	commitment complex	GO:0000243	0.0495058	1.30534	12	1573	3	35134	VITVI07G00145,VITVI07G00234,VITVI15G01262
GO:CC	cyclin-dependent protein kinase holoenzyme complex	GO:0000307	0.0495058	1.30534	58	1573	7	35134	VITVI08G00019,VITVI14G02006,VITVI16G01285,VITVI17G00648,VITVI18G00239,VITVI18G02527,VITVI18G00040
GO:CC	U4 snRNP	GO:0005687	0.0495058	1.30534	12	1573	3	35134	VITVI07G00145,VITVI13G01053,VITVI15G01262
GO:CC	SMN-Sm protein complex	GO:0034719	0.0495058	1.30534	12	1573	3	35134	VITVI07G00145,VITVI08G01822,VITVI15G01262
GO:CC	proteasome regulatory particle, lid subcomplex	GO:0008541	0.0495058	1.30534	12	1573	3	35134	VITVI02G00842,VITVI11G00935,VITVI14G00418
KEGG	KEGG root term	KEGG:00000	4.54386e-22	21.3426	2608	1573	231	35134	VITVI07G01247,VITVI17G01311,VITVI07G03105,VITVI07G02548,VITVI01G01563,VITVI01G00355,VITVI01G00360,VITVI01G00368,VITVI01G00390,VITVI01G00499,VITVI01G00932,VITVI01G00590,VITVI01G01762,VITVI01G01779,VITVI01G01782,VITVI01G01758,VITVI02G00729,VITVI02G00842,VITVI02G00111,VITVI02G00187,VITVI02G00249,VITVI02G00308,VITVI02G00318,VITVI02G00327,VITVI02G00340,VITVI02G00341,VITVI02G01098,VITVI03G01190,VITVI03…
KEGG	Ribosome	KEGG:03010	7.47434e-08	7.12643	166	1573	28	35134	VITVI07G02548,VITVI02G00249,VITVI03G01190,VITVI04G00149,VITVI04G01439,VITVI05G00455,VITVI05G01254,VITVI06G01433,VITVI06G04445,VITVI07G00025,VITVI08G01778,VITVI09G00119,VITVI10G00712,VITVI11G00103,VITVI13G01229,VITVI13G00718,VITVI13G00905,VITVI15G00516,VITVI15G00377,VITVI16G01711,VITVI16G01054,VITVI16G01104,VITVI16G01364,VITVI17G04155,VITVI17G00684,VITVI17G00899,VITVI17G00930,VITVI19G01389
KEGG	Ribosome biogenesis in eukaryotes	KEGG:03008	2.62563e-07	6.58077	46	1573	14	35134	VITVI02G00341,VITVI04G04112,VITVI07G00831,VITVI07G00226,VITVI08G02190,VITVI08G01588,VITVI08G01813,VITVI11G00452,VITVI13G01540,VITVI14G00383,VITVI14G01895,VITVI16G01083,VITVI17G00111,VITVI17G00141
KEGG	Metabolic pathways	KEGG:01100	0.000942075	3.02591	1235	1573	86	35134	VITVI07G01247,VITVI01G01563,VITVI01G00360,VITVI01G00932,VITVI01G01779,VITVI01G01782,VITVI01G01758,VITVI02G00729,VITVI03G00097,VITVI03G00185,VITVI03G00257,VITVI03G00287,VITVI03G00368,VITVI03G00773,VITVI04G00410,VITVI04G01183,VITVI04G01193,VITVI04G01280,VITVI04G01378,VITVI04G01454,VITVI04G01751,VITVI04G00897,VITVI05G00497,VITVI05G00612,VITVI05G00043,VITVI05G01044,VITVI06G00230,VITVI06G00346,VITVI06…
KEGG	Phagosome	KEGG:04145	0.000942075	3.02591	58	1573	11	35134	VITVI17G01311,VITVI02G00327,VITVI02G00340,VITVI04G01198,VITVI05G01545,VITVI06G00051,VITVI06G00348,VITVI06G01847,VITVI08G00961,VITVI10G01005,VITVI18G00590
KEGG	Biosynthesis of amino acids	KEGG:01230	0.00117511	2.92992	131	1573	17	35134	VITVI07G01247,VITVI01G00360,VITVI01G01779,VITVI01G01758,VITVI03G00097,VITVI03G00257,VITVI03G00287,VITVI03G00773,VITVI05G00497,VITVI05G00612,VITVI06G00346,VITVI07G00047,VITVI08G01672,VITVI08G00071,VITVI14G01990,VITVI19G00666,VITVI19G00458
KEGG	Biosynthesis of secondary metabolites	KEGG:01110	0.00117511	2.92992	681	1573	53	35134	VITVI07G01247,VITVI01G00360,VITVI01G00932,VITVI01G01779,VITVI01G01782,VITVI01G01758,VITVI02G00729,VITVI03G00097,VITVI03G00185,VITVI03G00257,VITVI03G00287,VITVI03G00773,VITVI04G00161,VITVI04G00410,VITVI04G01183,VITVI04G01193,VITVI04G01280,VITVI04G01378,VITVI04G01454,VITVI05G00497,VITVI05G00612,VITVI05G01044,VITVI06G00346,VITVI06G00529,VITVI06G01125,VITVI07G00520,VITVI07G01750,VITVI07G00047,VITVI08…
KEGG	Protein processing in endoplasmic reticulum	KEGG:04141	0.00255719	2.59224	141	1573	17	35134	VITVI17G01311,VITVI02G00187,VITVI03G00368,VITVI04G01198,VITVI05G01255,VITVI05G01545,VITVI06G00284,VITVI06G00696,VITVI07G00394,VITVI07G01891,VITVI11G00331,VITVI12G00453,VITVI13G00280,VITVI13G00602,VITVI16G01391,VITVI17G01164,VITVI18G01133
KEGG	Spliceosome	KEGG:03040	0.00406286	2.39117	84	1573	12	35134	VITVI07G01800,VITVI07G00145,VITVI07G00234,VITVI11G00452,VITVI11G01656,VITVI11G00595,VITVI14G02588,VITVI14G02509,VITVI15G01262,VITVI18G00396,VITVI19G00131,VITVI19G00722

## Sheet: M28_Sig_GO
Source	Term Name	Term ID	Adjusted P Value	Negative log10 of Adjusted P Value	Term Size	Query Size	Intersection Size	Effective Domain Size	Intersections
GO:MF	O-methyltransferase activity	GO:0008171	0.00956339	2.01939	72	14	2	35134	VITVI03G00524,VITVI18G01669
GO:MF	caffeoyl-CoA O-methyltransferase activity	GO:0042409	0.00956339	2.01939	1	14	1	35134	VITVI03G00524
GO:MF	methylated histone binding	GO:0035064	0.0334347	1.4758	7	14	1	35134	VITVI07G01672
GO:MF	methylation-dependent protein binding	GO:0140034	0.0334347	1.4758	7	14	1	35134	VITVI07G01672
GO:MF	S-adenosylmethionine-dependent methyltransferase activity	GO:0008757	0.0359949	1.44376	232	14	2	35134	VITVI03G00524,VITVI18G01669
GO:BP	nitrile metabolic process	GO:0050898	0.0262993	1.58006	1	14	1	35134	VITVI12G00727
GO:BP	nitrile biosynthetic process	GO:0080028	0.0262993	1.58006	1	14	1	35134	VITVI12G00727
GO:BP	cellular biosynthetic process	GO:0044249	0.0382718	1.41712	6060	14	8	35134	VITVI03G01420,VITVI03G00524,VITVI06G00153,VITVI07G01672,VITVI08G00292,VITVI09G00215,VITVI12G00727,VITVI18G01669
GO:BP	biosynthetic process	GO:0009058	0.039636	1.40191	6350	14	8	35134	VITVI03G01420,VITVI03G00524,VITVI06G00153,VITVI07G01672,VITVI08G00292,VITVI09G00215,VITVI12G00727,VITVI18G01669
KEGG	Linoleic acid metabolism	KEGG:00591	0.00796507	2.09881	4	14	1	35134	VITVI06G00153
KEGG	alpha-Linolenic acid metabolism	KEGG:00592	0.0257814	1.58869	26	14	1	35134	VITVI06G00153

## Sheet: M29_Sig_GO
Source	Term Name	Term ID	Adjusted P Value	Negative log10 of Adjusted P Value	Term Size	Query Size	Intersection Size	Effective Domain Size	Intersections
GO:BP	quinone biosynthetic process	GO:1901663	0.0113996	1.94311	34	29	2	35134	VITVI07G01947,VITVI11G01467
GO:BP	quinone metabolic process	GO:1901661	0.0113996	1.94311	34	29	2	35134	VITVI07G01947,VITVI11G01467
GO:BP	ketone biosynthetic process	GO:0042181	0.0113996	1.94311	34	29	2	35134	VITVI07G01947,VITVI11G01467
GO:BP	protein-containing complex assembly	GO:0065003	0.0113996	1.94311	500	29	5	35134	VITVI00G04798,VITVI04G01854,VITVI07G00310,VITVI16G00439,VITVI17G01401
GO:BP	response to wounding	GO:0009611	0.0113996	1.94311	34	29	2	35134	VITVI07G01829,VITVI18G00597
GO:BP	response to abiotic stimulus	GO:0009628	0.0113996	1.94311	604	29	5	35134	VITVI02G00310,VITVI07G00310,VITVI07G01829,VITVI07G01947,VITVI13G00350
GO:BP	protein-RNA complex organization	GO:0071826	0.0113996	1.94311	155	29	3	35134	VITVI00G04798,VITVI04G01854,VITVI17G01401
GO:BP	cellular component assembly	GO:0022607	0.0113996	1.94311	699	29	5	35134	VITVI00G04798,VITVI04G01854,VITVI07G00310,VITVI16G00439,VITVI17G01401
GO:BP	response to stimulus	GO:0050896	0.0113996	1.94311	4152	29	11	35134	VITVI02G00310,VITVI06G00647,VITVI06G01533,VITVI07G00310,VITVI07G01829,VITVI07G01947,VITVI08G01887,VITVI08G00091,VITVI13G00350,VITVI15G00817,VITVI18G00597
GO:BP	protein-RNA complex assembly	GO:0022618	0.0113996	1.94311	152	29	3	35134	VITVI00G04798,VITVI04G01854,VITVI17G01401
GO:BP	protein-containing complex organization	GO:0043933	0.0138357	1.859	822	29	5	35134	VITVI00G04798,VITVI04G01854,VITVI07G00310,VITVI16G00439,VITVI17G01401
GO:BP	cellular response to light stimulus	GO:0071482	0.0138357	1.859	41	29	2	35134	VITVI07G01829,VITVI07G01947
GO:BP	response to UV-A	GO:0070141	0.0152458	1.81685	1	29	1	35134	VITVI07G01829
GO:BP	cellular response to UV-A	GO:0071492	0.0152458	1.81685	1	29	1	35134	VITVI07G01829
GO:BP	cellular response to freezing	GO:0071497	0.0152458	1.81685	1	29	1	35134	VITVI13G00350
GO:BP	regulation of lignin biosynthetic process	GO:1901141	0.0152458	1.81685	1	29	1	35134	VITVI13G00350
GO:BP	cellular response to radiation	GO:0071478	0.0152458	1.81685	45	29	2	35134	VITVI07G01829,VITVI07G01947
GO:BP	cellular response to abiotic stimulus	GO:0071214	0.0174628	1.75789	58	29	2	35134	VITVI07G01829,VITVI07G01947
GO:BP	cellular response to environmental stimulus	GO:0104004	0.0174628	1.75789	58	29	2	35134	VITVI07G01829,VITVI07G01947
GO:BP	response to chemical	GO:0042221	0.0185377	1.73194	1490	29	6	35134	VITVI02G00310,VITVI06G01533,VITVI07G00310,VITVI08G01887,VITVI08G00091,VITVI15G00817
GO:BP	dimethylallyl diphosphate biosynthetic process	GO:0050992	0.0233797	1.63116	2	29	1	35134	VITVI04G01175
GO:BP	dimethylallyl diphosphate metabolic process	GO:0050993	0.0233797	1.63116	2	29	1	35134	VITVI04G01175
GO:BP	cellular ketone metabolic process	GO:0042180	0.0233797	1.63116	74	29	2	35134	VITVI07G01947,VITVI11G01467
GO:BP	cellular component biogenesis	GO:0044085	0.0287747	1.54099	1158	29	5	35134	VITVI00G04798,VITVI04G01854,VITVI07G00310,VITVI16G00439,VITVI17G01401
GO:BP	respiratory chain complex III assembly	GO:0017062	0.0287747	1.54099	3	29	1	35134	VITVI16G00439
GO:BP	cellular response to high light intensity	GO:0071486	0.0287747	1.54099	3	29	1	35134	VITVI07G01829
GO:BP	mitochondrial respiratory chain complex III assembly	GO:0034551	0.0287747	1.54099	3	29	1	35134	VITVI16G00439
GO:BP	regulation of localization	GO:0032879	0.0288647	1.53963	91	29	2	35134	VITVI06G00647,VITVI07G00310
GO:BP	response to nitrogen compound	GO:1901698	0.0338742	1.47013	104	29	2	35134	VITVI06G01533,VITVI15G00817
GO:BP	regulation of secondary metabolite biosynthetic process	GO:1900376	0.0338742	1.47013	4	29	1	35134	VITVI13G00350
GO:BP	cellular response to light intensity	GO:0071484	0.0338742	1.47013	4	29	1	35134	VITVI07G01829
GO:BP	response to freezing	GO:0050826	0.039207	1.40664	5	29	1	35134	VITVI13G00350
GO:BP	cellular response to cold	GO:0070417	0.039207	1.40664	5	29	1	35134	VITVI13G00350
GO:BP	phylloquinone metabolic process	GO:0042374	0.0393461	1.4051	7	29	1	35134	VITVI07G01947
GO:BP	regulation of auxin polar transport	GO:2000012	0.0393461	1.4051	6	29	1	35134	VITVI07G00310
GO:BP	calcium ion transmembrane import into cytosol	GO:0097553	0.0393461	1.4051	7	29	1	35134	VITVI06G00647
GO:BP	vitamin K metabolic process	GO:0042373	0.0393461	1.4051	7	29	1	35134	VITVI07G01947
GO:BP	inositol trisphosphate metabolic process	GO:0032957	0.0393461	1.4051	6	29	1	35134	VITVI18G00597
GO:BP	negative regulation of sequestering of calcium ion	GO:0051283	0.0393461	1.4051	7	29	1	35134	VITVI06G00647
GO:BP	regulation of sequestering of calcium ion	GO:0051282	0.0393461	1.4051	7	29	1	35134	VITVI06G00647
GO:BP	release of sequestered calcium ion into cytosol	GO:0051209	0.0393461	1.4051	7	29	1	35134	VITVI06G00647
GO:BP	sequestering of calcium ion	GO:0051208	0.0393461	1.4051	7	29	1	35134	VITVI06G00647
GO:BP	chaperone-mediated protein complex assembly	GO:0051131	0.0393461	1.4051	6	29	1	35134	VITVI07G00310
GO:BP	vitamin K biosynthetic process	GO:0042371	0.0393461	1.4051	7	29	1	35134	VITVI07G01947
GO:BP	cellular response to UV	GO:0034644	0.0393461	1.4051	7	29	1	35134	VITVI07G01829
GO:BP	phylloquinone biosynthetic process	GO:0042372	0.0393461	1.4051	7	29	1	35134	VITVI07G01947
GO:BP	root meristem growth	GO:0010449	0.0439927	1.35662	8	29	1	35134	VITVI07G00310
GO:BP	cellular response to stimulus	GO:0051716	0.0440331	1.35622	2121	29	6	35134	VITVI06G00647,VITVI07G00310,VITVI07G01829,VITVI07G01947,VITVI13G00350,VITVI15G00817
GO:BP	ribonucleoprotein complex biogenesis	GO:0022613	0.0440331	1.35622	474	29	3	35134	VITVI00G04798,VITVI04G01854,VITVI17G01401
GO:BP	fat-soluble vitamin biosynthetic process	GO:0042362	0.0496638	1.30396	10	29	1	35134	VITVI07G01947
GO:BP	inositol phosphate metabolic process	GO:0043647	0.0496638	1.30396	10	29	1	35134	VITVI18G00597
GO:BP	fat-soluble vitamin metabolic process	GO:0006775	0.0496638	1.30396	10	29	1	35134	VITVI07G01947
GO:CC	intracellular anatomical structure	GO:0005622	0.0173731	1.76012	10380	29	18	35134	VITVI00G04798,VITVI02G00310,VITVI03G01303,VITVI04G01854,VITVI04G01175,VITVI04G01182,VITVI07G00310,VITVI07G00814,VITVI07G01829,VITVI07G01947,VITVI11G00909,VITVI11G01467,VITVI13G00350,VITVI15G00817,VITVI15G00263,VITVI16G00439,VITVI17G01401,VITVI18G00597
GO:CC	intracellular membrane-bounded organelle	GO:0043231	0.0466134	1.33149	7998	29	14	35134	VITVI00G04798,VITVI02G00310,VITVI03G01303,VITVI07G00310,VITVI07G00814,VITVI07G01829,VITVI07G01947,VITVI11G00909,VITVI11G01467,VITVI13G00350,VITVI15G00263,VITVI16G00439,VITVI17G01401,VITVI18G00597
GO:CC	membrane-bounded organelle	GO:0043227	0.0466134	1.33149	8046	29	14	35134	VITVI00G04798,VITVI02G00310,VITVI03G01303,VITVI07G00310,VITVI07G00814,VITVI07G01829,VITVI07G01947,VITVI11G00909,VITVI11G01467,VITVI13G00350,VITVI15G00263,VITVI16G00439,VITVI17G01401,VITVI18G00597
GO:CC	cytoplasm	GO:0005737	0.0466134	1.33149	6370	29	12	35134	VITVI02G00310,VITVI04G01854,VITVI04G01175,VITVI04G01182,VITVI07G00310,VITVI07G01829,VITVI07G01947,VITVI11G01467,VITVI15G00817,VITVI16G00439,VITVI17G01401,VITVI18G00597
KEGG	Inositol phosphate metabolism	KEGG:00562	0.0489564	1.31019	30	29	1	35134	VITVI18G00597
KEGG	Cyanoamino acid metabolism	KEGG:00460	0.0489564	1.31019	26	29	1	35134	VITVI06G01533
KEGG	Ubiquinone and other terpenoid-quinone biosynthesis	KEGG:00130	0.0489564	1.31019	27	29	1	35134	VITVI07G01947
KEGG	Phosphatidylinositol signaling system	KEGG:04070	0.0489564	1.31019	26	29	1	35134	VITVI18G00597
KEGG	Sesquiterpenoid and triterpenoid biosynthesis	KEGG:00909	0.0489564	1.31019	9	29	1	35134	VITVI19G00388

## Sheet: M32_Sig_GO
Source	Term Name	Term ID	Adjusted P Value	Negative log10 of Adjusted P Value	Term Size	Query Size	Intersection Size	Effective Domain Size	Intersections
GO:BP	signal transduction	GO:0007165	0.0372656	1.42869	1239	18	4	35134	VITVI08G00027,VITVI13G00351,VITVI16G01442,VITVI16G01437
GO:BP	response to ethylene	GO:0009723	0.0372656	1.42869	102	18	2	35134	VITVI16G01442,VITVI16G01437
GO:BP	hormone-mediated signaling pathway	GO:0009755	0.0372656	1.42869	508	18	3	35134	VITVI08G00027,VITVI16G01442,VITVI16G01437
GO:BP	signaling	GO:0023052	0.0372656	1.42869	1248	18	4	35134	VITVI08G00027,VITVI13G00351,VITVI16G01442,VITVI16G01437
GO:BP	cellular response to hormone stimulus	GO:0032870	0.0372656	1.42869	514	18	3	35134	VITVI08G00027,VITVI16G01442,VITVI16G01437
GO:BP	response to stimulus	GO:0050896	0.0372656	1.42869	4152	18	7	35134	VITVI03G01650,VITVI03G00752,VITVI03G00757,VITVI08G00027,VITVI13G00351,VITVI16G01442,VITVI16G01437
GO:BP	cellular response to organic substance	GO:0071310	0.0372656	1.42869	588	18	3	35134	VITVI08G00027,VITVI16G01442,VITVI16G01437
GO:BP	cellular response to ethylene stimulus	GO:0071369	0.0372656	1.42869	80	18	2	35134	VITVI16G01442,VITVI16G01437
GO:BP	cellular response to endogenous stimulus	GO:0071495	0.0372656	1.42869	519	18	3	35134	VITVI08G00027,VITVI16G01442,VITVI16G01437
GO:BP	phosphorelay signal transduction system	GO:0000160	0.0372656	1.42869	154	18	2	35134	VITVI16G01442,VITVI16G01437
GO:BP	ethylene-activated signaling pathway	GO:0009873	0.0372656	1.42869	79	18	2	35134	VITVI16G01442,VITVI16G01437
GO:BP	cell communication	GO:0007154	0.0428091	1.36846	1329	18	4	35134	VITVI08G00027,VITVI13G00351,VITVI16G01442,VITVI16G01437
GO:BP	plasmodesmata-mediated intercellular transport	GO:0010497	0.0495481	1.30497	10	18	1	35134	VITVI15G04664
GO:CC	extracellular space	GO:0005615	3.27961e-06	5.48418	95	18	4	35134	VITVI03G01650,VITVI03G00752,VITVI03G00757,VITVI07G00549
GO:CC	extracellular region	GO:0005576	0.000304939	3.51579	739	18	5	35134	VITVI03G01650,VITVI03G00752,VITVI03G00757,VITVI07G00549,VITVI15G04664
GO:CC	cellular_component	GO:0005575	0.00368771	2.43324	17597	18	16	35134	VITVI07G04608,VITVI01G00313,VITVI03G01650,VITVI03G00752,VITVI03G00757,VITVI07G00549,VITVI07G00176,VITVI08G00027,VITVI12G00154,VITVI13G00351,VITVI15G04664,VITVI14G01806,VITVI16G01442,VITVI16G01437,VITVI19G00200,VITVI19G00258
GO:CC	cellular anatomical entity	GO:0110165	0.00368771	2.43324	17432	18	16	35134	VITVI07G04608,VITVI01G00313,VITVI03G01650,VITVI03G00752,VITVI03G00757,VITVI07G00549,VITVI07G00176,VITVI08G00027,VITVI12G00154,VITVI13G00351,VITVI15G04664,VITVI14G01806,VITVI16G01442,VITVI16G01437,VITVI19G00200,VITVI19G00258
KEGG	MAPK signaling pathway - plant	KEGG:04016	0.00337178	2.47214	84	18	2	35134	VITVI03G01650,VITVI03G00757
KEGG	Plant-pathogen interaction	KEGG:04626	0.00364362	2.43847	124	18	2	35134	VITVI03G01650,VITVI03G00757
KEGG	Plant hormone signal transduction	KEGG:04075	0.00446057	2.35061	169	18	2	35134	VITVI03G01650,VITVI03G00757
