# Supplementary material for: Transcriptome Profiling of a Salt Excluder Hybrid Grapevine Rootstock ‘Ruggeri’ throughout Salinity
Source: Plants (Basel). 2024 Mar 14;13(6):837. doi: 10.3390/plants13060837 (PMC10974295; doi:10.3390/plants13060837)
Supplement: Supplementary file 1 [file plants-13-00837-s001.zip › Tabel S6.xlsx]

## Sheet: qPCR_ME_Kmeans_data_plus_notIN_
Table S6: The oligonucleotide primers of assessed genes by qPCR and the correlation coefficient between RNA-seq and qPCR data.
Order	GENE ID	Gene Abbreviation	Module	K-means cluster	Function	Best Hit Arabi. Name	Arabi. Defline	Arabi. Symbol	Gene Name	Primer_F	Primer_R	Product Size (bp)	R2	P-Value	Homology
1	VIT_212s0028g03010	GRX480	M1	12	ROS	AT1G28480.1	Thioredoxin superfamily protein	GRX480,roxy19	TXN	TTCAGAGAACGCCGTCATAG	AACCTTCCTCCGATGAACAC	213	0.997	1.15e-08	Thioredoxin superfamily protein
2	VIT_201s0011g06450	NAD(P)-L	M1	11	ROS	AT1G59960.1	NAD(P)-linked oxidoreductase superfamily protein		NO	CTTTGGGGAAACAAAGCAC	AAACGGACGCATAATCCAT	181	0.98	2.35e-06	NAD(P)-linked oxidoreductase superfamily protein
3	VIT_203s0063g01160	2-ODDsL1	M1	8	ROS	AT3G19000.1	2-oxoglutarate (2OG) and Fe(II)-dependent oxygenase superfamily protein		2OGF1	TTCAAGCTGATGGGACTCA	ATTCTCCATCGGTTTTTCG	226	0.998	4.34e-09	2-oxoglutarate (2OG) and Fe(II)-dependent oxygenase superfamily protein
4	VIT_203s0063g01310	2-ODDsL2	M1	8	ROS	AT3G19000.1	2-oxoglutarate (2OG) and Fe(II)-dependent oxygenase superfamily protein		2OGF2	ACCCGTACGCTTGTTCATT	ACAGCATCAGGTGGGTTTT	159	0.994	7.87e-08	2-oxoglutarate (2OG) and Fe(II)-dependent oxygenase superfamily protein
5	VIT_206s0004g06790	2-ODDsL3	M11	2	ROS	AT5G58660.1	2-oxoglutarate (2OG) and Fe(II)-dependent oxygenase superfamily protein		2OGF4	TGGCTAAGTGCAAGTCCAA	CTGCACTTGGCTACGAAAA	225	0.989	4.21e-07	2-oxoglutarate (2OG) and Fe(II)-dependent oxygenase superfamily protein
6	VIT_203s0063g01150	2-ODDsL4	M11	9	ROS	AT3G19000.1	2-oxoglutarate (2OG) and Fe(II)-dependent oxygenase superfamily protein		2OGF3	TTCAAGCTGTTGGGACTCA	TCCATTCTCCATCGGTTTT	229	0.9	0.000328	2-oxoglutarate (2OG) and Fe(II)-dependent oxygenase superfamily protein
7	VIT_215s0048g01710	2-ODDsL5	M11	2	ROS	AT1G23740.1	Oxidoreductase, zinc-binding dehydrogenase family protein		AOR	TGGAGCTTCTGAAGTGGTTG	AATAAACCGCTCTTGGATGG	233	0.995	2.89e-08	Oxidoreductase, zinc-binding dehydrogenase family protein
8	VIT_212s0059g01670	TRZ2	M11	2	ROS	AT2G04530.1	Metallo-hydrolase/oxidoreductase superfamily protein	CPZ,TRZ2	GLY	CCTTGAGGGCAAAAGTTCTC	TAGCGGGAGGAGAAATGAGT	163	0.984	1.34e-06	Metallo-hydrolase/oxidoreductase superfamily protein
9	VIT_206s0004g03550	APX1	M11	9	ROS	AT1G07890.3	ascorbate peroxidase 1	APX1,ATAPX01,ATAPX1,CS1,MEE6	APX1	ATAGCCGTTAGGCTCTTGGA	CGCTGAGACCCATTTGAGTA	232	0.941	6.71e-05	ascorbate peroxidase 1
10	VIT_208s0040g03150	APX2	M11	9	ROS	AT3G09640.1	ascorbate peroxidase 2	APX1B,APX2	APX2	ATCCAACTGCCATCAGACAA	TCCTTGTTCCTCAGCATCAG	156	0.903	0.000294	ascorbate peroxidase 2
11	VIT_208s0007g04600	UGT1	M1	12	Sugar	AT2G36770.1	UDP-Glycosyltransferase superfamily protein		UGT1	TTGGAACTCGACACTGGAA	TGCCATCACACCAAGTTTC	184	0.992	1.64e-07	UDP-Glycosyltransferase superfamily protein
12	VIT_212s0034g00130	UGT2	M1	12	Sugar	AT3G21760.1	UDP-Glycosyltransferase superfamily protein	HYR1	UGT2	GCTCGCTGGATTCGTTATT	ATTGAAATCCAAGCCCTCA	160	0.998	1.52e-09	UDP-Glycosyltransferase superfamily protein
13	VIT_212s0034g00140	UGT3	M1	12	Sugar	AT3G21760.1	UDP-Glycosyltransferase superfamily protein	HYR1	UGT3	TGGCCAATGTATGCAGAAC	ACCCTCGCCTCATTATTCA	170	0.989	3.71e-07	UDP-Glycosyltransferase superfamily protein
14	VIT_212s0055g00020	UGT4	M1	12	Sugar	AT3G21760.1	UDP-Glycosyltransferase superfamily protein	HYR1	UGT4	GATGTTTGCCGAACAACAA	TAAAATGGCCCAAGGAAAA	245	0.998	1.7e-09	UDP-Glycosyltransferase superfamily protein
15	VIT_212s0055g00070	UGT5	M11	12	Sugar	AT3G21760.1	UDP-Glycosyltransferase superfamily protein	HYR1	UGT5	GGACGGCTAGAATTGGAAA	GCGTTGATTTGTTGCTCTG	172	0.984	1.21e-06	UDP-Glycosyltransferase superfamily protein
16	VIT_212s0055g00160	UGT6	M1	12	Sugar	AT3G21760.1	UDP-Glycosyltransferase superfamily protein	HYR1	UGT6	AGCGGTTTTATCCCACTCA	AACCCCAAATCTTTCACCA	156	0.997	1.19e-08	UDP-Glycosyltransferase superfamily protein
17	VIT_212s0055g00180	UGT7	M1	12	Sugar	AT3G21760.1	UDP-Glycosyltransferase superfamily protein	HYR1	UGT7	CTCCCCCAAAGGGTAAAAT	CGTTGATTTGTTGCTCTGC	249	0.998	2.36e-09	UDP-Glycosyltransferase superfamily protein
18	VIT_212s0055g00250	UGT8	M1	12	Sugar	AT3G21760.1	UDP-Glycosyltransferase superfamily protein	HYR1	UGT8	CCATCATGAACTGGCTTGA	CCGTCCGATGTAAAAATCC	231	0.998	1.33e-09	UDP-Glycosyltransferase superfamily protein
19	VIT_212s0055g00290	UGT9	M1	12	Sugar	AT3G21760.1	UDP-Glycosyltransferase superfamily protein	HYR1	UGT9	CTGGGTTCGTTATTGACGTG	CTCAGCATCCGAGTTCTTGA	179	0.997	1.22e-08	UDP-Glycosyltransferase superfamily protein
20	VIT_212s0055g00030	UGT71.1	M1	12	Sugar	AT3G21780.1	UDP-glucosyl transferase 71B6	UGT71B6	UGT71.1	CTCGGGAGATTGAAATTGG	TGTTGGCCATCATGTCTTC	159	0.995	3.58e-08	UDP-glucosyl transferase 71B6
21	VIT_212s0055g00060	UGT71.2	M11	12	Sugar	AT3G21780.1	UDP-glucosyl transferase 71B6	UGT71B6	UGT71.2	CGCTGGGTTCGTTATTGAT	ATTGAAATCCAAGCCCTCA	157	0.932	0.0001	UDP-glucosyl transferase 71B6
22	VIT_212s0055g00310	UGT71.3	M1	12	Sugar	AT3G21780.1	UDP-glucosyl transferase 71B6	UGT71B6	UGT71.3	CACCCAAATGGGATATGGT	CAAAGTCCCTTGGAAATGC	230	0.983	1.48e-06	UDP-glucosyl transferase 71B6
23	VIT_217s0000g02230	JAZ3	M11	2	Hormones	AT3G17860.1	jasmonate-zim-domain protein 3	JAI3,JAZ3,TIFY6B	JAZ3	TATGCCGGTTCAGTGAATGT	TTGGTTCCCCATAAAACCAT	171	0.991	2.27e-07	jasmonate-zim-domain protein 3
24	VIT_218s0001g12880	JMT	M11	2	Hormones	AT1G19640.1	jasmonic acid carboxyl methyltransferase	JMT	JMT	CTTTGTGCACTCCTCTTCCA	TGACAATACCATGCGTCCTT	217	0.997	1.15e-08	jasmonic acid carboxyl methyltransferase
25	VIT_206s0004g01450	LOX2	M11	9	Hormones	AT3G45140.1	lipoxygenase 2	ATLOX2,LOX2	LOX2	CTGGTGACTTTGGGGAGATT	CCTTCTGGTGTTTGTGATGG	205	0.933	9.62e-05	lipoxygenase 2
26	VIT_209s0002g00670	SAUR-72L	M11	9	Hormones	AT3G12830.1	SAUR-like auxin-responsive protein family		SAUR	GTTGAGAGCAAGCAAGTTGG	TGCAGAACCCATATTCCTCA	209	0.732	0.00672	SAUR-like auxin-responsive protein family
27	VIT_207s0031g00720	RRTF1.1	M1	12	TFs	AT4G34410.1	redox responsive transcription factor 1	RRTF1	RRTF1	TCGGAGACGGAATGAAGAT	AACCGCATTCCTGACACTT	204	0.977	4.06e-06	redox responsive transcription factor
28	VIT_203s0063g00460	RRTF1.2	M1	12	TFs	AT4G34410.1	redox responsive transcription factor 1	RRTF1	RRTF2	GCAGCCACTTCAGGAAAAT	CAAAAGCTGTGGGCATTC	171	0.98	2.68e-06	redox responsive transcription factor
29	VIT_218s0001g09850	MYBR1	M1	12	TFs	AT5G67300.1	myb domain protein r1	ATMYB44,ATMYBR1,MYB44,MYBR1	MYBR1	AACTTTGAAGCGGAAATGCT	GGAGCACTGGAATCACTGAA	168	0.996	1.5e-08	myb domain protein r1
30	VIT_218s0122g01300	RWP-RK1.1	M1	12	TFs	AT1G76350.1	Plant regulator RWP-RK family protein		NLP1	AGGAAACTCCTTCCCTGGTT	CCCTCACTTTTTCCTTTTGG	192	0.997	8.27e-09	Plant regulator RWP-RK family protein
31	VIT_218s0122g01310	RWP-RK1.2	M1	12	TFs	AT1G20640.1	Plant regulator RWP-RK family protein		NLP2	TCAGAGCCCTCCATTTTCTT	AGTTTGAGCCAAAGGCAGTT	212	0.996	2.74e-08	Plant regulator RWP-RK family protein
32	VIT_213s0084g00315	TFIIS	M1	12	TFs	AT5G05140.1	Transcription elongation factor (TFIIS) family protein		TCE	ACCAGAAGACAAGCCGAGAT	ATGCCGAAGTTTATGGGAAG	236	0.995	3.65e-08	Transcription elongation factor (TFIIS) family protein
33	VIT_203s0038g01460	LAP5	M1	12	Secondary Metabolites	AT4G34850.1	Chalcone and stilbene synthase family protein	LAP5	CHS	GGAAAAGAGGCTTGACTTGC	AATCAATCCCCACTCACCAT	169	0.992	1.32e-07	Chalcone and stilbene synthase family protein
34	VIT_219s0014g04840	TPS02L	M11	NA	Secondary Metabolites	AT1G70080.1	Terpenoid cyclases/Protein prenyltransferases superfamily protein		TC	TGACGTGTATGGTACACTCGAA	GCCGATATGATCTTCCTTCC	173	0.998	1.5e-09	Terpenoid cyclases/Protein prenyltransferases superfamily protein
35	VIT_212s0134g00040	TPS02	M11	9	Secondary Metabolites	AT4G16730.1	terpene synthase 02	TPS02	TPS2	ACATGTCAAGGTGGTGGAGA	AGTGCAGCCACTTTTGTCAG	151	0.997	1.1e-08	terpene synthase 02
36	VIT_219s0014g04850	TPS21.1	M1	8	Secondary Metabolites	AT5G23960.1	terpene synthase 21	ATTPS21,TPS21	TPS21.1	GCAGGCTCATGGATGATATG	TGACATCCTTCCATGCATTT	156	0.994	7.84e-08	terpene synthase 21
37	VIT_219s0014g04880	TPS21.2	M1	12	Secondary Metabolites	AT5G23960.2	terpene synthase 21	ATTPS21,TPS21	TPS21.2	CTTTTGTCGGAATGGGAGAT	TCCTTGTGTGTTTCCTGCTC	208	0.995	4.2e-08	terpene synthase 21
38	VIT_200s0266g00035	TPS14.1	M11	13	Secondary Metabolites	AT1G61680.1	terpene synthase 14	ATTPS14,TPS14	TPS14.3	AAGGACGAGAATCAGGATGG	AAAATGGATTTGGAGCAAGG	160	0.998	1.33e-09	terpene synthase 14
39	VIT_200s0385g00025	TPS14.2	M11	13	Secondary Metabolites	AT1G61680.1	terpene synthase 14	ATTPS14,TPS14	TPS14.2	TCCGGCTATTGAGACAAGAA	TGTGATCATTGTGCGTGTTC	222	0.996	2.14e-08	terpene synthase 14
40	VIT_200s0572g00010	TPS14.3	M11	13	Secondary Metabolites	AT1G61680.1	terpene synthase 14	ATTPS14,TPS14	TPS14.1	TAGCGATTTTCAAGGCACAG	TTTGTGAGCTCAACCCTCTG	240	0.978	3.51e-06	terpene synthase 14
41	VIT_219s0014g01740	NCX1L	M11	1	Transport	AT1G53210.1	sodium/calcium exchanger family protein / calcium-binding EF hand family protein		SCL	TGTGACCAGACGTACGGATT	ATAAGAATGGCATCGGGAAG	203	0.865	0.000811	sodium/calcium exchanger family protein / calcium-binding EF hand family protein
42	VIT_211s0016g00910	CCX4	M1	12	Transport	AT1G54115.1	cation calcium exchanger 4	ATCCX4,CCX4	CCX4	TGACGGTGAAAAATCCAAAA	GAACAGAGTCACGAGCCAAA	197	0.996	2.52e-08	cation calcium exchanger 4
43	VIT_213s0047g00050	ZIFL1	M11	2	Transport	AT5G13750.2	zinc induced facilitator-like 1	ZIFL1	ZIFL1	TTAATACAGCATGGGGCGTA	CCCAAACGCATAAACAGATG	161	0.989	4.17e-07	zinc induced facilitator-like 1
44	VIT_211s0037g00290	ENODL15	M11	14	Transport	AT4G31840.1	early nodulin-like protein 15	AtENODL15,ENODL15	ENODL15	CACTTCAAAGCCGATCAAGA	TGAACCCAACTCTCAAACCA	224	0.997	1.08e-08	early nodulin-like protein 15
45	VIT_210s0003g05126	CYP71B32	M11	NA	Others	AT3G53305.1	cytochrome P450, family 71, subfamily B, polypeptide 32	CYP71B32	CYP71B	TGCCTGAGAGATTTTTGGGTA	TAAGACCAGGTTTTGCATCG	213	0.985	1.15e-06	cytochrome P450, family 71, subfamily B, polypeptide 32
46	VIT_215s0046g02380	CYP86A8	M1	2	Others	AT2G45970.1	cytochrome P450, family 86, subfamily A, polypeptide 8	CYP86A8,LCR	CYP86A	AAGCCAAGCCAGTTGATCTT	CCACTTCTTCAGCTTCCACA	200	0.99	2.7e-07	cytochrome P450, family 86, subfamily A, polypeptide 8
47	VIT_217s0000g02050	NUDT17	M1	12	Others	AT2G01670.1	nudix hydrolase homolog 17	atnudt17,NUDT17	NUDT17	GGAGGTTGGGAAATTGATG	GCAGCCATCCATCTTCTTT	221	0.945	5.45e-05	nudix hydrolase homolog 17
48	VIT_201s0011g05670	NUDT18	M1	12	Others	AT1G14860.1	nudix hydrolase homolog 18	atnudt18,NUDT18	NUDT18	TGGAGCTTCATGAGCAAAA	TCCACCAATGCTGACAAAC	157	0.992	1.45e-07	nudix hydrolase homolog 18
49	VIT_201s0011g05060	MLP43	M11	14	Others	AT1G70890.1	MLP-like protein 43	MLP43	MLP	CAAGAACAAGACCAGCCTCA	AACGTCATGGACCCTTTTTC	180	0.966	1.28e-05	MLP-like protein 43
50	VIT_203s0038g03400	HCHIB	M11	14	Others	AT3G12500.1	basic chitinase	ATHCHIB,B-CHI,CHI-B,HCHIB,PR-3,PR3	CHIT	GCCTTCTTGGCTCAAACTTC	CCAGCTTGCCCATAGTTGTA	212	0.998	4.05e-09	basic chitinase
51	VIT_203s0063g00750	ABH-L	M11	11	Others	AT1G47480.1	alpha/beta-Hydrolases superfamily protein		ABHD	TCAATTTCCCACCCTTTCTC	GAGAACGTTTCGATGCAGAA	238	0.992	1.33e-07	alpha/beta-Hydrolases superfamily protein
52	VIT_203s0091g01290	SCPL7	M11	2	Others	AT3G10450.1	serine carboxypeptidase-like 7	SCPL7	SCPL7	ATGGCAGGAGGTCTAAATGG	AGGGAAAAGAAGCCTGAACA	231	0.974	5.87e-06	serine carboxypeptidase-like 7
53	VIT_213s0064g01750	BGLU1	M11	14	Others	AT2G44480.1	beta glucosidase 17	BGLU17	BGLU1	AATTTGGGGATCGAGTGAAG	ACTCCGATGATTCCCTTTTG	241	0.993	1.23e-07	beta glucosidase 17
54	VIT_213s0064g01660	BGLU2	M11	14	Others	AT2G44480.1	beta glucosidase 17	BGLU17	BGLU2	CTGGGAACTCTGCAACTGAA	ACTCGCCATATGTGATTGGA	237	0.998	1.38e-09	beta glucosidase 17
55	VIT_212s0059g02670	BAM5	M11	2	Others	AT4G15210.1	beta-amylase 5	AT-BETA-AMY,ATBETA-AMY,BAM5,BMY1,RAM1	BAM5	CCATAGCAAGGATGCTCTCA	GTGCATTCTCACCAGCAACT	168	0.97	8.42e-06	beta-amylase 5
56	VIT_209s0018g01800	HAD-L	M1	8	Others	AT4G25150.1	HAD superfamily, subfamily IIIB acid phosphatase		HAD	GCAGTGGAAACCAACAACA	ACCCAACTTGAGGCTTTCA	153	0.977	3.74e-06	HAD superfamily, subfamily IIIB acid phosphatase
57	VIT_219s0093g00320	GSTU25	M11	1	Others	AT1G17180.1	glutathione S-transferase TAU 25	ATGSTU25,GSTU25	GST	ATGGCAAACAGTGACCACAT	TATCAAGGACTCGCATACGG	216	0.997	5.11e-09	glutathione S-transferase TAU 25
58	VIT_219s0177g00160	COBL10	M1	9	Others	AT3G20580.1	COBRA-like protein 10 precursor	COBL10	COBL	AAGCCTCGGACAGCAACTAT	TCCCCGTATATGCATTCTGA	169	0.998	1.95e-09	COBRA-like protein 10 precursor
59	VIT_200s2536g00010	PCS-L	M11	NA	Others	AT2G17760.1	Eukaryotic aspartyl protease family protein		PCS	CGCAGATTTGTTATGGGTTG	GGCGGCTTAACTTCATCACT	190	0.988	5.75e-07	Eukaryotic aspartyl protease family protein
60	VIT_216s0098g00330	ORG1	M11	14	Others	AT5G53450.1	OBP3-responsive gene 1	ORG1	ORG1	CAAGGGAAATGATCCTTCGT	CTTGGTCCACACAGAAATGG	204	0.988	5.27e-07	OBP3-responsive gene 1
61	VIT_213s0067g02530	ETG1	M1	12	Others	AT2G40550.1	E2F target gene 1	ETG1	E2F1	GGGGTTGAGAATGCAAGATT	AGGCTGGAAAGGCAAAACTA	165	0.997	1.17e-08	E2F target gene 1
